# Supplementary material for: An Evolutionary Perspective on the Origin, Conservation and Binding Partner Acquisition of Tankyrases
Source: MDPI journal article supplement (doi:10.3390/biom12111688), 2022-11-15
Supplement: s1 [file s1]

# AMOT

## Homo sapiens:

>Q4VCS5 [Homo sapiens]  
MRNSEEQPSGGTTVLQRLLQEQLRYGNPSENRSLLAIHQQATGNGPPFPSSGSGNPGPQSD  
VLSPQDHHQQLVAHAA**QSEFGQGE**IQSENLMIMEKQLSPRMQNNELPTYEEAKVQSQYFR  
GQQHASVGAAFYVTGVTNQMRTEGRPSVQRLNPGKMHQDEGLRDLKQGHVRSLSERLMQ  
MSLATSGVKAHPVTSAPLSPFPQNDLYKNPTSSSEFYKAQGPLPNQHSLKGMHRGPP  
EYFPKGMPQSVVCKPQEPGHFYSEHRLNQPGRTEGQLMRYPHPPEYGAARPAQDISLPL  
SARNSQPHSPSSSLTSGGSLPLLQSPSPSTRLSPARHPLVFNQGDHSAHLPRPQQHFLPNQ  
AHQGDHYRLSQPGLSQQQQQQQQHHHHHHHQQQQQQQPPQQQGEAYSAMPRAQPSSASY  
QPVPADYFAIVSRAQMQMVEILSDENRNLRQLEGGCYEKVARLQKVETEIQRVSEAYENLV  
KSSSKREALEKAMRNKLEGEIRRMHDFNRDLRERLETANKQLAEKEYEGSEDTRKTIISQL  
FAKNKESQREKLEIRRMHDFNRDLRERLETANKQLAEKEYEGSEDTRKTIISQL  
DKVEKMQQALVQLQAACEKREQLEHRLRTRLERELESRLRIQQRGNCQPTNVSEYNAAAL  
MELLREKEERILALEADMTKWEQKYLEENVMRHFALDAAATVAAQRDRTTVISHSPNTSYD  
TALEARIQKEEEEILMANKRCLDMEGRIKTLHAQIIIEKDAMIKVLQQRSRKEPSKTEQLS  
CMRPAKSLMSISNAGSGLLSHSSSTLTGSPIMEEKRDDKSWKGLGILLGGDYRAEYVPS  
TSPVFPSTPLLSAHSKTGSRDCTQTERTGESNKTAAVAPISVPAPVAAAAATAAITATA  
ATITTTMVAAPVAVAAAAAPAAAAAPSATAAATAAAVSPAAGQIPAAAAVASAAAAVA  
PSAAAAAAVQVAPAAPVFPAPALVFPVAPAAAQASAPAQTAPTSAPAVAPTPTPTPT  
AVAQAEVPASPATGPGPHRLSIPSLTCNPDKTGPFVFSNTLERKTIPIQLGQEPDAEMV  
EYLI

## Pongo abelii:

>XP\_009233461.1 angiomotin isoform X1 [Pongo abelii]  
MRNSEEQPSGGTTVLQRLLQEQLRYGNPSENRSLLAIHQQATGNGPPFPSSGSGNPGPQSDVLSPQDHHQQ  
LVAAHAA**QSEFGQGE**IQSENLMIMEKQLSPRMQNNELPTYEEAKVQSQYFRGQQHASVGAAFYVTGVTNQK  
MRTEGRPSVQRLNPGKMHQDEGLRDLKQGHVRSLSERLMQMSLATSGVKAHPVTSAPLSPFPQNDLYKN  
PTSSSEFYKAQGPLPNQHSLKGMHRGPPPEYFPKGMPQSVVCKPQEPGHFYSEHRLNQPGRTEGQLMR  
YQHPPEYGAARPAQDISLPLSARNSQPHSPSSSLTSGGSLPLLQSPSPSTRLSPARHPLVFNQGDHSAHL  
PRPQQHFLPNQAHQGDHYRLSQPGLSQQQQQQQQHHHHHHHQQQQQQQPPQQQGEAYSAMPRAQPSSASY  
QPVPADYFAIVSRAQMQMVEILSDENRNLRQLEGGCYEKVARLQKVETEIQRVSEAYENLVKSSSKREALEK  
AMRNKLEGEIRRMHDFNRDLRERLETANKQLAEKEYEGSEDTRKTIISQLFAKNKESQREKLEAEALATA  
RSTNEDQRRHIEIRDQALSNAAQAVVLEELKKQVYVVDKVEKMQQALVQLQAACEKREQLEHRLRTRL  
ERLELESRLIQQRQNCQPTNVSEYNAAALMELLREKEERILALEADMTKWEQKYLEENVMRHFALDAAAT  
VAAQRDRTTVISHSPNTSYDTALEARIQKEEEEILMANKRCLDMEGRIKTLHAQIIIEKDAMIKVLQQRSRK  
EPSKTEQLSCMRPAKSLMSISNAGSGLLSHSSSTLTGSPIMEEKRDDKSWKGLGILLGGDYRAEYVPS  
TSPVFPSTPLLSAHSKTGSRDCTQTERTGESNKTAAVAPISVPAPVAAAAATAAITATAATITTTMVAAP  
PVAAAAAPAAAAAAAPSPATAAAIAAAVSPAAGQIPAAASVASAAVAPFAAAAAAVQVAPAAP  
APVFPAPALVFPVAPAAAQASAPAQTAPTSAPAVAPTPTPTPTPAVAQAEVPASPATGPGPHRLSVPSLT  
CNPDKTGPFVFSNTLERKTIPIQLGQEPDAEMVEYLI

## Mus musculus:

>NP\_695231.3 angiomotin isoform 1 [Mus musculus]  
MRSSDDQPSGGTTVLQRLLQEQLRYGNPSENRSLLAIHQQATGNSSPFSTGSGNQGPQNDVLSSQDHHQQ  
QLVAHP**QSEFGQGE**IQSENGVMEKQLSPRMQNNELPTYEEAKVQSQYFRGQQHASVGAAFYVTGVTNQK  
KMRTEGRPSVQRLTPGKMHQDEGLRDLKQGHVRSLSERLMQMSLATSGVKAHPVTSAPLSPFPQNDLYKN  
NATSSSEFYKAQGPPFSGHSLKGMHRGPPPEYFPKGVPQSQSVVCKPQEPGHFYSEHRLNQPGRTEGQLMR  
RYQHPPEYGAARPAQDISLPLSARNSQPHSPSSSLTAGASSLLPLLQSPSPSTRLPQGHLSVQGDHSAH  
LSRHQQHLLSSQSHQGDHYRHQAQSLTSAQQQGEAYSAMPRAQGSASQVPMADPFAMVSRQAQMQMVEIL  
SDENRNLRQLEGGCYEKVARLQKVETEIQRVSEAYENLVKSSSKREALEKAMRNKLEGEIRRMHDFNRDL  
RDLRETANKQLAEKEYEGSEDTRKTIISQLFAKHKNQREKLEAEALATARSTNEDQRRHIEIRDQALSN  
AQAKVVLEELKKQVYVVDKVEKMQQALVQLQAACEKREQLEHRLRTRLERELESRLIQQRQNSQPTN  
ASRYNAAALMELLREKEERILALEADMTKWEQKYLEENVMRHFALDAAATVAAQRDRTTVISHSPNTSYDT  
ALEARIQKEEEEILMANKRCLDMEGRIKTLHAQIIIEKDAMIKVLQQRSRKEPSKTEQLSSMRPAKSLMSI  
SNAGSGLLSHSSSTLTGAPIMEEKRDDKSWKGLGVLLGGDYRVEVPVPTSPVFPSTPLLSAHSKTGSRD  
CTQTERTGESTTAAVTPISAPMAGPVAAAAPAAAINATAATNTATATAATNTIMVAAAPVAVAAAAAPA  
AAAAATPSNAAALAAAAAPATSVSAATSVSAANSISPAAPVAPAAVPPAAPVSPAAPVIPAASALTP  
ATVSPATAATAAVAAATTAATAAAAAATTAIQVAPATSAVPVSPASIPAPATAQASAPTPTQASTPAP  
TEPSPVPVPTPALVQTEGPANPAGSSGPRRLSTPNLMCNPKDPDAPAFHSSTLERKTIPIQLGQEPDAE  
MVEYLI

## Gallus gallus:

>XP\_004940856.2 angiomotin [Gallus gallus]  
MRNSEEQAATTVLQRLLQEQLRYGNPNDRNLLALHQQATGNAPPFNSTGNPASQNEGLSSQDHLVTHA  
V**QSEFGQGE**IQVONSIMEKQLSPRLQNSDELPTYEEAKVQSQYFRGQPHASVGAAFYVTGVTNQMRTEG  
RPTVQRYVSPKVKHQDEGLKDLKQGHVRSLSERLMQLSLATSGVKAHAPVTSAPLSPLSPQSSDPYK  
NSGSSSEFYKNSVQPPSPQSMKGMQGRGPPPEYPKYKNVSTPSMCKPQDSGHFYSDHRVSQQGRSDGPMWR  
YQHPPEYGSVRQNFVQLQQRPPHHSPSSSLTSLGSLTLQSPPPSRLSPSQHQQLPTPSQGDGPIGL  
PRTQQPFLSNQVHQDGLYRLCQPFLLGPOQQGDSYSVMSRAQQIPSPYQMQQVDPFAIVSRAQMQMVEILS  
EENRSLRQELDGCYEKVARLQKLETEIQQVSEAYKNLEKSSSKRDALKAMRNKLEGEIRRLHDFNRDLR  
ERMETANKQLAEKEFEGSEDNRKTIISQLFAQNKETQREKEKLEIELAAARSTNEDQRRHIEIRDQALNNA  
QAKVKVLEELKKQVYVVEKVEKMQQALVQLQAACEKREQLEHRLRTRLERELESRLMQQRQGTQAANV  
SEYNATALMELLREKEERILALEADMTKWEQKYLEESVMRQFALDAAATVAAQRDRTTVISHSPNPSYDTS  
LEARIQKEEEEILLANRRCLDMEGRIKTLHAQIIIEKDAMIKVLQQRSRKEPGKTDQLSSMRPAKSLMSI  
NAGSGLLSHSSSTLSSTPIIEEKRDDKSWKGLGVLLGTEYRSESIPTSPSPVLPTPLLSAHSKTGSRDCT  
STQTRDNGEQSKAAPSPAAPTGRPLTASLPYADKTGDLFHSSTLERKAPVQTMGQDLPDGEMVEYLI

## Xenopus laevis:

>XP\_018085358.1 PREDICTED: angiomotin-like isoform X1 [Xenopus laevis]  
MRTSEEQAATTVLQRLLQEQLRYGNPNENRNLLALHQQATGNVPSYGGGQGSQNEGLTLQDPQLVPHA**QSEFGQGE**IQVENLMKQIPLRSQNSDELPTYEEAKVQSQYFRGQPHTSVGAAFYVTGVTNQMRTEGRPT  
VQVRVSPGKVHQDGLKDLKHGHVRSLSERLMQLSLATSGVKAHAPITSAPLSFQGPDPFKNSDNDMFKN  
FPQGGQGVTEHRGQVYVVEKVNISPLTQCKSEVEFGPHYGEHRGSLQNSDGDGPMRYQHPPEYGAARQ  
QDVQQQIQHRPSHYHSTSSLTSLGSMQLQSPITMSPSQQHPFSPSHGDFYTVPSRAHHIPIVYNVVFQ  
QDVKRSPOSQFGQQQMDPVLRLPPVPSPYQMQNDPPTIVSRAQNMVSLSEENRSLRKELEDYDKV  
ARFQKMEMEIQRISEAYENLVKSSSKRETLEKAMRTLEELIRRIHDFNRDLRERDNTANKQLAAKEFEG  
SEDNKRTIISQLLAQNKETQREKEKLEIEISSRLSTNQDQRRHIEIRDQALNNAQAKVVLEELKKQVY  
VDVKVEKMQQALVQLQAACEKREQLEHRLRTRLERELESRLRIQQRGQNSQSSNVSEYSAATIMELLREKEE  
RVLALAEADMTKWEQKYLEESVMRQFALDAAATVATQRTASISHSPSGSFDTSLEARIQKEEEEILLANR  
RCLVDEGRKIKTLHAQIIIEKDAMIKVLQQRSRKDPKTDQSSTMRPSKSLMSISNAGSGLLSHSSALSSTP  
LIEDKREDKSWKGLGVLLATEYRSESASSTSPSIRPSTPLLCGHSKTGSKDCTQTRGAEQNKPPSVS  
ASPGPGRLATPSPMYNSERTAETVFSSTLDRKNPLPLPLGQDLTDGELVEYLI

Salmo salar:

[illegible]

**Petromyzon marinus:**

XP\_032827792.1 a.giomotin-like protein 1 [Petromyzon marinus]  
 MFDGVRERALERMRAEDNSKGVLRILQIQELRYGVQDNRGLLALQQQATAGSPPTAANAATGAGASHG  
 ALSIAPTS'GAVSLGGAPAAQSSSISTSESLVDLRSEA [redacted] HQSSETPEKQARLALLQQQQ  
 QQQQY'QQQQQ'QQQQQY'QQQQQY'QHHTALEP'LYSEAA'HYSSYSS'LSQGGQGT'VHQRMSSNTGPA  
 FYVTAT'GAGKRGTEGRAVOTPS'PLPMDGGLKQGHVRS'LSERMLQ'TLENGKAGALPLGSSPSS  
 VSSPQSSADFCRLQNGSPQ'PFRDLPGRPFPEY'PFKHIAA'APQGS'PLQLQNTFALQHGHVYFGAEQH  
 LLRYQ'FPPEYNMARTQ'QGMQPMQ'VSSFSASQSGAGSLIS'QMSGAGL'GPMQNLGSMTL'VTAQQT'  
 PMYTGLOGS'SMAHTGAG'GEEELHMLLRSGQ'VELLTENM'LRSESLSEYCGED'KIQKMERVIRISEA  
 VLENKTS'KRLET'ALAKMTKMS'ERLHDFNRDRLDKLRS'NQLKASLR'VEKSEENDKLTAKI'KLKQ  
 AKCKE'RGRLPT'LELELETL'RAQQGAPGAPPT'GEHAAP'AMELLRLKREKRVLEAD'LEADWQKY  
 LEESAPQ'FAMDAANAAT'ERTDT'INANSNP'ASEEY'FLMASRCHDM'RGKINLHQA'ITEKDMIKY  
 LQSRSE'QKQGTSSAT'SLPKSPKSV'PTAANAAS'GPGGLAGLAAK'PMAASP'LEERLQAGTGSF  
 GLVSTELA'EGGSTAVGLSFLR'VSP'PPSPHIFV'KSSKSDSTQ'ETRGAEQ'VSSSHPMPPAAERK  
 KSNLT'PRGSKML'LDVSDRADDRADMMAGAEKLLDGR'PLHMSG'PDQEDQVNMVEHLLI

Branchiostoma belcheri:

No homolog found.

**Drosophila melanogaster:**

No homolog found.

### Hydra vulgaris:

No homolog found.

**Nematostella vectensis:**

No homolog found.

*Amphimedon queenslandica*:

No homolog found.

|                           |                                                                 |                                 |     |
|---------------------------|-----------------------------------------------------------------|---------------------------------|-----|
| XP_032827792.1[P.marinus] |                                                                 | -MGDPYARERALAEEMRAEE-----DMSGKV | 23  |
| XP_014052684.1[S.salar]   | MFRKXASSLRMPRISEENRNWIDRGSSSFHEVRGLRETEMRVADETSSTSNNSNTTV       |                                 | 60  |
| NP_695231.3[M.musculus]   |                                                                 | --MRSDDPPSGGTTV                 | 14  |
| Q4VC55[H.sapiens]         |                                                                 | --MRNSEEPSGGTIV                 | 14  |
| XP_009233461.1[P.abellii] |                                                                 | --MRNSEEPSGGTIV                 | 14  |
| XP_004940856.2[G.gallus]  |                                                                 | --MTNSEEQ--AATTI                | 12  |
| XP_018085358.1[X.laevis]  |                                                                 | --MTNSEEQ--AATTI                | 12  |
|                           |                                                                 | . . *                           |     |
| XP_032827792.1[P.marinus] | LQRLLQEQLRYRGTVDNRGLLATQQOATAGSPTPANAAATGAGAHSALSLAPTSLGAVS     |                                 | 83  |
| XP_014052684.1[S.salar]   | LQRLLQEQLRMGRYGSRNVQLAMQHQQQQQQRRQOE-GVGASQG-YPGHV-             |                                 | 107 |
| NP_695231.3[M.musculus]   | LQRLLQEQLRYGNPNSENRLAIHQATNGSPFSTGSNGNQGP-QNDVL                 |                                 | 62  |
| Q4VC55[H.sapiens]         | LQRLLQEQLRYGNPNSENRLAIHQATNGPFPPFGSGSGNPFP-QSDVI                |                                 | 62  |
| XP_009233461.1[P.abellii] | LQRLLQEQLRYGNPNSENRLAIHQATNGPFPPFGSGSGNPFP-QSDVI                |                                 | 62  |
| XP_004940856.2[G.gallus]  | LQRLLQEQLRYGNPNDRNLRLAHQAATGNAPPFN-TGGPAS-ONEGI                 |                                 | 59  |
| XP_018085358.1[X.laevis]  | LQRLLQEQLRYGNPNDRNLRLAHQAATGNVPYSY-GTPGS-ONEGI                  |                                 | 57  |
|                           | ****.****.                                                      |                                 |     |
| XP_032827792.1[P.marinus] | LOGAPAAAAGSSIISTESLVQDRQSACPLAQHQPMSSETPEKAQQLALLQQALQQQ        |                                 | 146 |
| XP_014052684.1[S.salar]   | GPDNRHDHMVMPIHAIAAFANLQDSGVCKEKSRRGG-                           |                                 | 146 |
| NP_695231.3[M.musculus]   | --SQNDHQQLVAHFADCPQTIGLSQENGWEKO                                |                                 | 96  |
| Q4VC55[H.sapiens]         | --SQDHMQ-QLVAHAACPQTIGLSIQENSELMEO                              |                                 | 95  |
| XP_009233461.1[P.abellii] | --SQDHMQ-QLVAHAACPQTIGLSIQENSELMEO                              |                                 | 95  |
| XP_004940856.2[G.gallus]  | --SQDHP-QLVTFAAACCFPCCTIGVS-LNMKEO                              |                                 | 87  |
| XP_018085358.1[X.laevis]  | TLDQP-QLVFHAACPFCCTIGVEN-LMEKO                                  |                                 | 90  |
|                           | : : * :                                                         |                                 |     |
| XP_032827792.1[P.marinus] | QYYQQQQCQQQQQQYYQQQQYQQHHHTAPELPYEERAKVHSQYSSLQSGGGGT-VHQA      |                                 | 202 |
| XP_014052684.1[S.salar]   | --SSGGGMSSGGGGSSGQNPFDELPTYEAARKVGHQPHGFPHHGQHQQHQQQQQ          |                                 | 199 |
| NP_695231.3[M.musculus]   | --LSPFMQNNELPTYEAARKVQSYFYRQGOH                                 |                                 | 125 |
| Q4VC55[H.sapiens]         | --LSPFMQNNELPTYEAARKVQSYFYRQGOH                                 |                                 | 124 |
| XP_009233461.1[P.abellii] | --LSPFMQNNELPTYEAARKVQSYFYRQGOH                                 |                                 | 124 |
| XP_004940856.2[G.gallus]  | --LSPFLQNNEDLTPLYEARVKVQSYFYRFQOPH                              |                                 | 119 |
| XP_018085358.1[X.laevis]  | --ILPRSQNNEDLTPLYEARVKVQSYFYRFQOPH                              |                                 | 116 |
|                           | *:*::*****:                                                     |                                 |     |
| XP_032827792.1[P.marinus] | MSNTGPSAAFVVYTATVGAQKGRTGRPAVRTSP-LPIMQDGDLKKELKHGHRVSLSERLMQ   |                                 | 261 |
| XP_014052684.1[S.salar]   | LFPSVGAAFFVTAITNGKRVTRTGRTVQRLSTGGKVHGDGDKLKDKGHVRVSLSERLMQ     |                                 | 259 |
| NP_695231.3[M.musculus]   | --ASVGAAFFVTVGT-NQMKTIEGRFSVQRLTP-GMHMDCEGLRDLDKGHRVSLSERLMQ    |                                 | 181 |
| Q4VC55[H.sapiens]         | --ASVGAAFFVTVGT-NQMKTIEGRFSVRQRP-GMHMDCEGLRDLDKGHRVSLSERLMQ     |                                 | 180 |
| XP_009233461.1[P.abellii] | --ASVGAAFFVTVGT-NQMKTIEGRFSVRQRP-GMHMDCEGLRDLDKGHRVSLSERLMQ     |                                 | 180 |
| XP_004940856.2[G.gallus]  | --ASVGAAFFVTVGT-NQMKTIEGRFTVQRVSP-KGVHQDEGLRKDKGHVRVSLSERLMQ    |                                 | 175 |
| XP_018085358.1[X.laevis]  | --TSVGAFFVTVGT-NQMKTIEGRFTVQRVSP-KGVHQDGLDKLKHGHRVSLSERLMQ      |                                 | 172 |
|                           | *****: *****: *****: *****:                                     |                                 |     |
| XP_032827792.1[P.marinus] | LTLKNKGAQAKPLPLGSSPPSVF-----QSSADFCLRNQJSPF---QRPDY             |                                 | 305 |
| XP_014052684.1[S.salar]   | LSLATSGVKAHAPTSAPLSPQLFP-PGPFDDGYKFS-----GQ                     |                                 | 297 |
| NP_695231.3[M.musculus]   | MSLATSGVKAHPPVTSAPSPLP-----PNDLYLNKNTSSSEFYKAQGPLNHSHSKLGE      |                                 | 235 |
| Q4VC55[H.sapiens]         | MSLATSGVKAHPPVTSAPSPLP-----PNDLYLNKNTSSSEFYKAQGPLNHSHSKLGE      |                                 | 234 |
| XP_009233461.1[P.abellii] | MSLATSGVKAHPPVTSAPSPLP-----PNDLYLNKNTSSSEFYKAQGPLNHSHSKLGE      |                                 | 234 |
| XP_004940856.2[G.gallus]  | LSLATSGVKAHAPTSAPLSPPLSPSQSSSDYPKYNSG-SSEFYKSNVPPPSPSMKMG       |                                 | 221 |
| XP_018085358.1[X.laevis]  | LSLATSGVKAHAPTSAPLSPQ-----PGDFYNKD-SDNMFKN---PPQCQGQKYTE        |                                 | 234 |
|                           | ::*.:.*:.:**.*:                                                 |                                 |     |
| XP_032827792.1[P.marinus] | PRGPPPEYFFPKHAKAAPQSGPLQNLQFTALQHQQHHHVPGAQBHLRYQPPEYNMARQ      |                                 | 365 |
| XP_014052684.1[S.salar]   | HRTGPPPYDFPNKMGSFKSQPOHQEGGHYQEHRRFDPRDQGRNEVPHVRYQPPVEYGSFS    |                                 | 357 |
| NP_695231.3[M.musculus]   | HRGPPPEYFFPGKFQSPQSV---CKSGEPGHIFYSEHRLNQGRTEGQLMKRVQHPPEYGAARA |                                 | 293 |
| Q4VC55[H.sapiens]         | HRGPPPEYFFPGKFQSPQSV---CKFPEGPHYSEHRLNQGRTEGQLMKRVQHPPEYGAARP   |                                 | 292 |
| XP_009233461.1[P.abellii] | HRGPPPEYFFPGKFQSPQSV---CKFPEGPHYSEHRLNQGRTEGQLMKRVQHPPEYGAARP   |                                 | 292 |
| XP_004940856.2[G.gallus]  | RGCPEPEYFKMVYSTPMSC-CFKQSDGHIFTSEHRVLSQRSQCSDCMBRWQHPPEYGSARG   |                                 | 292 |
| XP_018085358.1[X.laevis]  | HRGPPPEYFKMITNSTPLFQ-GKSEKVGFBHYGEHGLSKNRSDBGMMRWQHPPEYGSARG    |                                 | 279 |
|                           | *****:*****:*****:*****:                                        |                                 |     |
| XP_032827792.1[P.marinus] | TQQGM----QPMQNYSHSPASQSGSAGSLSQMS-GAGALGP-----PMQNLGSMITLT      |                                 | 413 |
| XP_014052684.1[S.salar]   | NKESS---VHQSRVHHHTPTSSITSVGLSRAQSTISLNSLASHPSTTHPPQCGDPYAS      |                                 | 412 |
| NP_695231.3[M.musculus]   | TDITSSLISLARNSQPHSTPTSSLTAGASSLPLQLQSPSPSTRLPQGP-H-LVSNQGDHSAH  |                                 | 350 |
| Q4VC55[H.sapiens]         | AQDIS-LPLSANRQPHSTPTSSLTSGG-SLPLQSPSPSTRLSPAR-H-HPLVNQGDHSAH    |                                 | 348 |
| XP_009233461.1[P.abellii] | AQDIS-LPLSANRQPHSTPTSSLTSGG-SLPLQSPSPSTRLSPAR-H-HPLVNQGDHSAH    |                                 | 348 |
| XP_004940856.2[G.gallus]  | NPDVQ-LQLQORRPHHHSPTSSLTSLG-SLTLQSPSPSTRLSRQHOQPLTFPSQGDGPLL    |                                 | 334 |
| XP_018085358.1[X.laevis]  | NPDVQ-QQIQHRPSHYHSPTSSLTSLG-SMLSQLSPTI-MSPSQ-OHPFPSHGDGYFTV     |                                 | 334 |
|                           | : : ** *:                                                       |                                 |     |
| XP_032827792.1[P.marinus] | TA-----VAQPTMY                                                  |                                 | 423 |
| XP_014052684.1[S.salar]   | TGPRS---PQGGSGHGDIYLCGATHPLPQRGHGPFMDHDPYESTSRMHQQQCHHGFQOOQ    |                                 | 472 |
| NP_695231.3[M.musculus]   | LS-RHQDLLSSQSQGHGDIRHRAQ-----ASLT                               |                                 | 377 |
| Q4VC55[H.sapiens]         | LP-RPQGHFLPNQAQGHGDIRLSQ-----PGLSQQQQQQQQQHHHH-H                |                                 |     |

|                           |                                                                              |     |
|---------------------------|------------------------------------------------------------------------------|-----|
|                           | ALRSTNQDQRRIHEIRQDLNNAQAQKVVLKLEELKKQVYVEKVERMQQALQLQAACE                    | 712 |
| NP_695231.3[M.musculus]   | TARSTNDNRQHRIEIRDQALSNAQQRVVKLKEELKKQVYVDVKVEQMQUALVQLQAACE                  | 598 |
| Q4VC55[H.sapiens]         | TARSTNDQRRIHEIRDQALSNAQAQVVVLKLEELKKQVYVDVKVEQMQUALVQLQAACE                  | 618 |
| XP_009233461.1[P.abellii] | TARSTNDNRQHRIEIRDQALSNAQAQVVVLKLEELKKQVYVDVKVEQMQUALVQLQAACE                 | 619 |
| XP_004940856.2[G.gallus]  | AARSTNDQRRIHEIRDQALSNAQAQVVVLKLEELKKQVYVEKVERMQQALQLQAACE                    | 597 |
| XP_018085358.1[X.laevis]  | SIRSTNQDQRRIHEIRDQALNNAAQAQVVVLKLEELKKQVYVDVKVEQMQUALVQLQAACE                | 580 |
|                           | *:* : ***** : :* : ..... : * : * : * : * : * : * : * : * : *                 |     |
| XP_032827792.1[P.marinus] | REQLERLRITRLERELETETRAQQRGAPPFGA-TSEHAAPALMELLEKEERVLAADM                    | 693 |
| XP_014052684.1[S.salar]   | REQLEHLRLTRLERELESLSRMQQRGVQSQQSSSGQEYSATAMHLEHRKEERILALEAD                  | 772 |
| NP_695231.3[M.musculus]   | REQLEHLRLTRLERELESLSRTQQRGQNCPFT-ASEYNAAALMELLEKEERILALEAD                   | 657 |
| Q4VC55[H.sapiens]         | REQLEHLRLTRLERELESLSRTQQRGQNCPFT-VSEYNAAALMELLEKEERILALEAD                   | 678 |
| XP_009233461.1[P.abellii] | REQLEHLRLTRLERELESLSRTQQRGQNCPFT-VSEYNAAALMELLEKEERILALEAD                   | 677 |
| XP_004940856.2[G.gallus]  | REQLEHLRLTRLERELESLSRMQQRGVQSQAAN-VSEYNATALEMLEKEERILALEAD                   | 666 |
| XP_018085358.1[X.laevis]  | REQLEHLRLTRLERELESLSRTQQRGVQSSSN-VSEYSAATLMELLEKEERVLAADM                    | 639 |
|                           | ***** : ***** : * : * : * : * : * : * : * : * : * : * : *                    |     |
| XP_032827792.1[P.marinus] | MWWEQKYLVESAMRFQFMDAAAATAATERDT---TIANSFNASFS-----EEEEF                      | 832 |
| XP_014052684.1[S.salar]   | TKWEQKYLVESVFQPDALDAASVAATQTDSLVSIVSHSPSFSESQGLSVEARIQKEEBI                  | 772 |
| NP_695231.3[M.musculus]   | TKWEQKYLEENWMRHFDALDAATAVAAGRDT--TVISHSPNTSYDT--ALEARIQKEEBI                 | 713 |
| Q4VC55[H.sapiens]         | TKWEQKYLEENWMRHFDALDAATAVAAGRDT--TVISHSPNTSYDT--ALEARIQKEEBI                 | 734 |
| XP_009233461.1[P.abellii] | TKWEQKYLEENWMRHFDALDAATAVAAGRDT--TVISHSPNTSYDT--ALEARIQKEEBI                 | 733 |
| XP_004940856.2[G.gallus]  | TKWEQKYLVESWMRHFDALDAATAVAAGRDT--TVISHSPNSPYDT--SLEARIQKEEBI                 | 712 |
| XP_018085358.1[X.laevis]  | TKWEQKYLVESVMRFQDALDAATAVTGRDT--ASTISHSPNSPYDT--SLEARIQKEEBI                 | 695 |
|                           | :*****:*:*:*:*:*:*:*:*:*:*:*:*:*:*:*:*:*:*:*:                                |     |
| XP_032827792.1[P.marinus] | MLASRRCHDMEGRIKNLHAQIIIEKDAMIKVLQRSKRKEQGKGTESSATSLRPAKSVPSIA                | 800 |
| XP_014052684.1[S.salar]   | LMANRRCLDMESRIKNLHAQIIIEKDAMIKVLHQRSRKDP-NKRDRAQAIMRPFKSLSMTA                | 791 |
| NP_695231.3[M.musculus]   | LMAINKRCLDMEGRIKTLLHAQIIIEKDAMIKVLQQRSKPE-SKTE-QLSMRPFAKSLMSIS               | 871 |
| Q4VC55[H.sapiens]         | LMAINKRCLDMEGRIKTLLHAQIIIEKDAMIKVLQQRSKPE-SKTE-QLSCMRPAKSLMSIS               | 792 |
| XP_009233461.1[P.abellii] | LMAINKRCLDMEGRIKTLLHAQIIIEKDAMIKVLQQRSKPE-SKTE-QLSMRPFAKSLMSIS               | 791 |
| XP_004940856.2[G.gallus]  | LLANRRCLDMEGRIKTLLHAQIIIEKDAMIKVLQQRSKPE-GKTD-QLSMRPFAKSLMSIS                | 770 |
| XP_018085358.1[X.laevis]  | LLANRCVDMEGRIKTLLHAQIIIEKDAMIKVLQQRSKRP-SKTD-QSSMTRPKSLMSIS                  | 753 |
|                           | :::.* ** * *:*****:*****:*****:~::~:::~::~:** :                              |     |
| XP_032827792.1[P.marinus] | AASGSPGGGLASGLAARKPPMAASPSEELEGA--RTGSFSLGYSTELAEGETASVGL                    | 858 |
| XP_014052684.1[S.salar]   | NIG----G---SGLLSHSLLGSSSPIETE-RKDSXMGWSLLGLCGDYREP---L--                     | 936 |
| NP_695231.3[M.musculus]   | NA----G---SGLLSHSSTLTGFIMEEKDRDKSWKSGLLGLLGVDYREP---V-                       | 816 |
| Q4VC55[H.sapiens]         | NA----G---SGLLSHSSTLTGFSPIEEKDRDKSWKSGLLGLLGVDYRAEY---V-                     | 837 |
| XP_009233461.1[P.abellii] | NA----G---SGLLSHSSTLTGFSPIEEKDRDKSWKSGLLGLLDYRAEY---V-                       | 836 |
| XP_004940856.2[G.gallus]  | NA----G---SGLLSHSSTLSTPTILEEKREDKSWKSGLLGLVLTGYRES---I-                      | 815 |
| XP_018085358.1[X.laevis]  | NA----G---SGLLSHSSTLSTPTILEEKREDKSWKSGLLGLVLTGYRES---A-                      | 798 |
|                           | : ~::~** *** :::.:::~::~* ~::~* ~::~* ~::~* ~::~* ~::~* ~::~* ~::~* ~::~*    |     |
| XP_032827792.1[P.marinus] | SPMKRALPLPPPSPH-FTHVXSXXSDSTQTGERAQGEQSSPHMDPAAERKKNTLP                      | 917 |
| XP_014052684.1[S.salar]   | RTEISSSSPVFLPTLGHSGTSGSRDCSTQTDKGQSQGQEAASSKPSTPAL--QSMTLPS                  | 993 |
| NP_695231.3[M.musculus]   | PST--PSPVPPTPLLASAHTSGSRDCSTQTERGSTKTAATVPISPAP-----MAG                      | 866 |
| Q4VC55[H.sapiens]         | APT--PSPVPPTPLLASAHTSGSRDCSTQTERGSTKTAATVPISPAP-----AP                       | 866 |
| XP_009233461.1[P.abellii] | PST--PSPVPPTPLLASAHTSGSRDCSTQTERGSTKTAATVPISPAP-----AP                       | 865 |
| XP_004940856.2[G.gallus]  | PST--PSPVLPTPLLASAHTSGSRDCSTQTDARGNEQKAAPSAPA--P-----TPG                     | 883 |
| XP_018085358.1[X.laevis]  | SST--PSPPIRPTPLLCGSGKDDCCTQTDARGEQNKPRPSVAS--P-----PG                        | 846 |
|                           | ** * ~::~* ~::~* ~::~* ~::~* ~::~* ~::~* ~::~* ~::~* ~::~* ~::~* ~::~* ~::~* |     |
| XP_032827792.1[P.marinus] | GSKM-LPSLHVLRVDARDRA-----DMKMAAGE-----                                       | 944 |
| XP_014052684.1[S.salar]   | RLSS-----                                                                    | 997 |
| NP_695231.3[M.musculus]   | FVAAAAATAAINATAATTNTATTTTMM/VAAAFVAVAAVAAAAA-----TPSPAANA                    | 923 |
| Q4VC55[H.sapiens]         | -VAAAAATAAI-----TATAATITTTTTMM/VAAAAAFVAAAAA-----AAPSPAANA                   | 937 |
| XP_009233461.1[P.abellii] | -VAAAAATAAI-----TATAATITTTTTMM/VAAAFVAAAAAATAAAAAAAAAPATAA                   | 937 |
| XP_004940856.2[G.gallus]  | RLPT-----                                                                    | 867 |
| XP_018085358.1[X.laevis]  | RLAT-----                                                                    | 850 |
|                           | ----                                                                         |     |
| XP_032827792.1[P.marinus] | -----                                                                        | 944 |
| XP_014052684.1[S.salar]   | -----                                                                        | 997 |
| NP_695231.3[M.musculus]   | LAAAAAPATSVAANTSVAANSISPAAPVAAVVPAAFPVPAAPVPAAPAAVQIPAAASLTPTAV              | 983 |
| Q4VC55[H.sapiens]         | TA-----AAVSPAAAGQIPAAASVAS--                                                 | 955 |
| XP_009233461.1[P.abellii] | TA-----AAVSPAAAGQIPAAASVAS--                                                 | 958 |
| XP_004940856.2[G.gallus]  | -----                                                                        | 867 |
| XP_018085358.1[X.laevis]  | -----                                                                        | 850 |
|                           | -----                                                                        |     |
| XP_032827792.1[P.marinus] | -----                                                                        | 944 |
| XP_014052684.1[S.salar]   | -----                                                                        | 997 |
| NP_695231.3[M.musculus]   | SPTAATAATAVAAATTAITAAAAAATTAIVQAPATAPAVPASVPSIPA-----PATAQASPT               | 104 |
| Q4VC55[H.sapiens]         | -----AAAVPAS-AAAAAAAVQVPAAPAFPVALVPPVPAAPAAQAQSPA                            | 999 |
| XP_009233461.1[P.abellii] | -----VAAPVAPAAAAAAVQVPAAPAFPVALVPPVPAAPAAQAQSPA                              | 100 |
| XP_004940856.2[G.gallus]  | -----                                                                        | 867 |
| XP_018085358.1[X.laevis]  | -----                                                                        | 850 |
|                           | -----                                                                        |     |
| XP_032827792.1[P.marinus] | -----                                                                        | 944 |
| XP_014052684.1[S.salar]   | -----                                                                        | 997 |
| NP_695231.3[M.m           |                                                                              |     |
