# Supplementary material for: An Evolutionary Perspective on the Origin, Conservation and Binding Partner Acquisition of Tankyrases
Source: MDPI journal article supplement (doi:10.3390/biom12111688), 2022-11-15
Supplement: s1 [file s1]

# TAB182

## Homo sapiens:

>NP\_203754.2 182 kDa tankyrase-1-binding protein [Homo sapiens]  
MKVSTLTRESSAMASPLPREMEEELVPTGSEPGDTRAKPPVKPKPRALPAKPALPAKPSLLVPVGP RP PPRG  
PLAELPSARKMMMLAGPQPYGGSKRPLPFAPRP AVEASTGGEATQETGKEEAGKEEPPPLTPPARCAAPG  
GVRKAPAPFRPASERFAATTVEEILAKMEQPRKEVLASPDRLWGSRLTFNHDGSSRYGPRTYGTTTAPRD  
EDGSTLFRGWSQEGPVKSPAECREEHSKTPEERSLPSDLAFNGDLAKAASSELPADISKPWIPSSPAPSS  
ENGGPASPLGPAEASGSGPGSPHLHPPDKSSPCHSQLLEAQTPEASQASPCPAVTPSPAS AALPDEGSRH  
TPSPGLPAEGAPEAPRFPSSPPPEVLEPHSLDQPATSPRPLIEVGELLDLTRTFPSSGEEEEAKGDAHLRP  
TSLVQRRFSEGLVQSPSQDQEKLGGS LAALPQGGQS QALDRPFGAESNWSLSQSFEWTFPTRPSGLGVW  
RLDSPPPSPITEASEAAEAAEAGNLAVSSREEGVSQQGAGSAPSGSGSSWVGDDPSMSLTQKGDGES  
QPQPPAVPLEPLPTTETGTPGLPLQQAEEERYESQEPLAGQESPLPLATREAAALPILEPVLGQE QPAAPDQP  
CVLPADAPEPGQALPVEEEAVTLARAETTQARTEAQDLCRASPEPPGPESSSRWLDDLASPPPSGGGAR  
RGAGAE LKDTQSPSTCSEGLLGWSQKDLQSEFGITGDPQPSSFSPPSWCQGASQDYGLGGASPRGDPGLG  
ERDWT SKYQGAGEGSTREWASRCGIGQEEMEASSSQDQSKVSAPGVLTAQDRVVGKPAQLGTQRSQEAD  
VQDWEFRKRDSQGTYSRRDAELQDQEFKGRDSLGTYSRRDVS LGDWEFGKRDSL GAYASQDANEQGQDLG  
KRDHHGRYSSQDADEQDWEFQKR DVS LGTYGSRAAE PQEFGKSAWIRDYSSGSSSRTLDAQDRSFGTR  
PLSSGFSPEEAQQQDEEFKKI PSVEDSLGEGSRDAGRPERGSGGLFSPSTA HVPD GALGQRDQSSWQN  
SDAQSEVGGHQERQAGAGPGGSADLEDGEMGKRGVWGEFSLSVGPQREAAFPSPGQDWSRDFCIEASER  
SYQFGIIGNDRVSGAGSPSSKMEGGHFVPPGKTTAGSV DWTQDLGLRNLEVSSCVSGSGSSEARENAV  
QMGWSGGLSLRDMNLTGCLSESGGSEEPGGIGVGEKDWTS DNVNKS KDLAEVGE GGGHSQARES GVGQTDW  
SGVEAGEFLKSRERGVGQADWTPDLGLRNMAPGAVCSPGEHKLGVGQMDWGNLGLRDL E VTCDDPSGG  
SQGLRGCGVGQMDWTQDLAPRNVELFGAPSEAREHGVGVSQCPEPGLRHNGSLSPGLEARDPLEARELG  
VGETS GPE TQGEDYSSSSLEPHPADPGMETGEALSFGASPGRCPARPPSPSGQLLEEMLAASSSKAVAR  
RESAASGLGGLLEEEGAGAGAAQEEVLEPGRDSPPSW **RQCPDGEAS**QTEDVDGTWSSAARWSDQGPAQT  
SRRPSQGP PARSPQDPSFIEDTEILDSAMYRSRANLGRKRGHRAPIRPGGTLGLSEADSDAHLFQDS  
TEPRASRVSSDEEVVEEPQSRRTMSLGTKGLKVNLPFGLSPSALKAKLRPNRNSAEEGELAESKSSQK  
ESA VQRSKCKVPGLGKPLTLPPKPEKSSGSESSPNWLQALKLKKKKV

## Pongo abelii:

>XP\_002821835.2 182 kDa tankyrase-1-binding protein [Pongo abelii]  
MKVSTLTRESSAMASPLPREMEEELVPTGSEPGDTRAKPPVKPKPRALPAKPALPAKPSLLVPVGP RP PPRG  
PLAELPSARKMMMLAGPQPYGGSKRPLPFAPRP AVEASTGGEATQETGKEEAGKEEPPPLTPPARCAAPG  
GVRKAPAPFRPASERFAATTVEEILAKMEQPRKEVPASPDRLWGSRLTFNHDGSSRYGPRTYGTTTAPRD  
EDGSTLSRGWSQEGPVKSPAECQE EHRKTP EERSLPSDLAFNGDLAKAASSELPADISKPWIPSSPAPSS  
ENGGPASPLGPAEASGSGPGSPHLHSPDKSSPCHSQLLEAQSP EASQASPCSPVTPTAPSAALPDEGSRH  
TPSPGLPAEGAPEAPRFPSSPPPEVLEPHSLDQPATSPQPIEVGELLDLTRTFPSSGEEEEAKGDAHLRP  
TSLVQRRFSEGLVQSPSQDQEKLGGS LAALPQGGQS QALDRPFGAESNWSLSSESFEWTFPTRPSGLGVW  
RLDSPPPSPITEASEAAEAAEAGNLAVSSGEEGVSQQGAGSAPSGSGSSWVGDDPSMSLTQKGDGES  
QPQPPAVPLEPLPTTETGTPGLPLQQAEEERYESQEPLAGQESPLPLATREAAALPILEPVLGQE QPAAPDQP  
CVLPADVP EPGQALPVEEAMTLDR AETTQPRTEAQDLCRASPEPPGPESSSRWLDDLASPPPSGGGAR  
RGAGSELKDAQSPSTCSEGLLGWSQKDLQSEFGITGDPQPSSFSPPSWCQGASQDYGLGGASPRGDPGLG  
ERDWT SKYQGAGEGSTRDWASRCGIGQEEMEASSSQDQSEVSAPGALTAQDRVVGKPAQLGTQRSQEAD  
VQDWEFRKRDSQGTYSRRDAELQDQEFKGRDSLGTYSRRDVS LGDWEFGKRDSL GTYASQDVNEQGQDLG  
KRDHRGRYSSQDADEQDWKFQKR DVS LGTYGSRGAEPQE QEFGKSAWIRDYSSGSSSRTLDAQDRSFGTR  
PLSSGFSPEEAQQQDEEFKKI PSVEDSLGEGSRDAGRPERESGGLFSPSTA HVPD GALGQRDQSSWQN  
SDAQSEVGGHQERQAGAGPGGSADLEDGEMGKRGVWGEFSLSVGPRREAAFPSPGQDWSRDFCIEASER  
SYQFGIIGNDRVSGAGSPSSKMEGGHFVPPGKTTAGSV DWTQDLGLRNLEVSSCVSGSGSSEARENAV  
QMGWSGGLSLRDMNLTGCLSESGGSEEPGGIGVGEKDWTS DNVNKS KDLAEVGE GGGHSQARES GVGQTDW  
SGVEAGEFLKSRERGVGQADWTPDLGLRNMAPGAVCSPGEHKLGVGQMDWGNLGLRDL E VTCDDPSGD  
SQGLRGCGVGQMDWTQDLAPRNVELFGAPSEAREHGVGVSQCPEPGLRHNGSLSPGLEARDPLEARELG  
VGETS GPE TQGEDDSSFSLEPHPADPGMETGEALSFGASPGRRPARPPSPSGQLLEEMLAASSSKAVAQ  
RESAASGLGGLLEEEGAGAGAAQEEVLEPGRDSPPSW **RQCPDGEAS**QTEDVDGTWSSAARWSDQGPAQT  
SRRPSQGP PARSPQDPSFIEDTEILDSAMYRSRANLGRKRGHRAPIRPGGTLGLSEADSDARLFQDS  
TEPRASRVSSDEEVVEEPQSRRTMSLGTKGLKVNLPFGLSPSALKAKLRPNRNSAEEGEPAESKSSQK  
ESA VQRSKCKVSGLGKPLTLPPKPEKSSGSESSPNWLQALKLKKKKV

## Mus musculus:

>NP\_001074729.1 182 kDa tankyrase-1-binding protein [Mus musculus]  
MKGSTLTREGTAMASPLPREMEEELAPVGSEPCDPRAKPPVKPKPRGLPSKPALPAKPSLLVPVGP RP PPRG  
PLAELPSARKMMMLAGPQPYGVSKRPLPFAPRP SAEATAGGDVTVQESGKEDAGKEDLPPLTPPARCAALG  
GVRKAPAPFRPSSERFAACTVEEILAKMEQPRKEILASPDRLWGSRLTFNHDGSSRYGPRTYGA PCPREE  
DSKSPAKGRSQEGTA EIPAE CQE EHSKTPEERNLTSSPAMNGDLAKLACSEAPT DVS KTWVTSSADP VSE  
HGGSTSAVRLANI SV PASESPRLSSRPSPCHSQLSETQSPAASEASSICLPVTPASPSAVLP AEPFGHS  
PSELPAEAA PETLSPNSSPVETVSGHSP EQPPVLLPQLLTGAELPDITRTFP CGEEAAARGHTESRP  
SSLAQRRFSEGLVQPPSQDQEKLGGS LATLPQGQGSQALDRPFGSGTESNWSLSQSFEWTFPTRPSGLG  
WMRLDSPPPSPITEASEAAEAAEADSWAVSGRGEGVSVQVGPCTPPAPESPRKPI SGVQGNPDGISL PQRD  
DGESQRPSPALLPSTVEGPPGAPLLQAKENYEDQEPLVGHESPITLAAREAAPLVLEPALGQQQPTPSDQ  
PCILFVDVPDPEQALSTEEDVVTLGWAETTLPMTEAQEPCSVSP EPTGP ESSSRWLDDLASPPPNSSGA  
RRAAGAE LKDRQSPSTCSEGLLGWAQKDLQSEFGVATDSHSSFGSSWSQDTSQNYLSGGRSPVGD TGL  
GKR DWSKCGGSGEGSTREWASRHSLGQEVIGIGGSQDSEEVVPRERAVGRPAQLGAQGLEADAQQWEF  
GKRESQDPHSHIDKEIQDQEFKGRDSLGSFSTRDASLQDWEFGKRASVSTNQD TDENDQELGMKNLSRGY  
SSQDAEEQDREFEKRDVLIDHGRAT AQNQEF GKSAWFQDYSGGGGSRVLGSGQERGFGIRLSLSSGFS  
PEEAQQQDEEFKKTFVGEDRFCEASRDVGHLEEGASGGLLSPTSPHSRDGAARPKDEGSWQDGDSSQEI  
TRLQGRMQAESQSPTNVLDLKEREQRWAGEFSLGVAAQSEAAFPSPCRQDWSR DVCVEASESSYQFGIIGNDRVSGAGLSPSRKSGGGHFVPPGETKAGAVDWTQDLGLRNLEVSSCVSSEGPSEAREN VVGQMGWSDS  
LGLNNGDLARLQGTGESEEPRLSLVG EKDWTS SVEARNRDLPGQAEVGRHSQARES GVGPEPDWSGAEAGE  
FLKSRERGVGQADWTPDLGLRNMAPGAGCSPGEPRELGVGQVWDGDDLGLRNLEVSCDLESGGSRGCGVG  
QMDWAQDLGLRNRLRCGAPSEVRECGVRVGPDL ELDPKSSGSLSPGLETDPLEARELG VGEISGPE TQ  
GEDSSSPSFETPS EDTGMDTGEAPSLGASPS SCLTRSPPSGSQSLLEGIMTASSSKGAPQRESAASGSRV  
LLEEEGLAAGAGQGE PQFEPSPRAPLPS **RQCPDGEAS**QVEEVDGTWSLTGAARQNEQASAPPPRRPRPRL  
PSCPSED F S FIEDTEILDSAMYRSRANLGRKRGHRAPIRPGGTLGLSETADSDTRLFQDSTEPRASRV  
SSDEEVVEEPQSRRTMSLGTKGLKVNLPFGLSPSALKAKLRSRNSAE EGVTESKSSQKESSVQRSKS  
CKVPGLGKPLTLPPKPEKSSGSESSPNWLQALKLKKKKI

### **Gallus gallus:**

>XP\_040557690.1 182 kDa tankyrase-1-binding protein isoform X1 [Gallus gallus]  
MASQPQSLHPPPLPCASGGAGLAAGSPEKGSRPKPPVVRPKPRVLPKPAVPAKPCLPHPPPAPRHSRPELP  
SAEKINRLAGPQPYSGGGGAALRRPSFTIKSPETPNGKGLSPPPVLTPEDESCSTPSDEVPLAPSTPSRK  
GPAPFKVTPVVFVATKKLERFPGTVEEILAKMDSKEGLGSPDRARLSFFCPDSSSRFGSKTFTAFRRRRPSG  
EADGDSPCGEARQLLQQAEGELCTGGDRCLMVETSSSSPAGPSCAGDPGCLRRPPSPDLSLSLQLGPPGSP  
RPPACPPPGAFFQPSASAPGSPDAPPELLAPGSPTMAPESPESPAQRPTTELLATSIQAPGAPSSVAEPW  
LGASHSPGSPHTPSEGSPTPASPTPGTSQLSPKATCPPGSPESATEPSPPPSPPPELPARASCPPGSPG  
GPDDSLVSSQTPEGPDFSLPPSNRDSGLRRSSEGVLRPPPSEGQGMGLLGGSLGALPQPGDLPAEHLMSG  
ESSWSLSQSFEWTFPTRGVRGLPSPPRSPIQEAADSGLSEEDSDREGAATGSHGDSGDTDGPGLAVTSS  
WGAE GAPCPGGFVAQQEAESEEEEEEGEAE L D S T E L H I V E P S L D S A E P E P F V K A A P D P A P T E A D A S C E  
PTGDFPASLQGLGGFGQDEGSSKGPD A H T D P R W L T E L L A S P R A S G R D P L N T E E Q E G L L G W S R K D L C S E  
F G I G R S H Q A G A F D W S H K A V A R Q G D W P C E M E Q D Q K F R T N S S R N N S C G I S D M N Q Q D R A F G A A E R D W S S N Y K G  
T E L M G D T R L G S S D W S K S H G A G E S C L Q D Q D F S K P T W G T G Y G L D S A G S R E E V G S G K A E W S S P Y S V G H G Q Q Q D  
K E L S S R Q P G W A G K Y G S G D L E T H S G D A A P V W S S E Y G T G D A D I K D R E V T P D W A S K Y S S R D A E T K D K D F T L G W  
A G R S S T G D A G T L D K E F C S S R S A W D S K Y S T R D M E S Q D R E F S P S R P A W S G E Y S T Q D M E S Q D R E F S P S R L A E A  
S E Y S S R D M E I Q D R E F S P S R P A C A E E H S T S D M E S Q D R E F S T S R P T W H R E Y S S R D M E S Q D R E F S P S R P A C T N  
E Y S T S D A E T Q D R E F N P S R P T W H S E Y S S R D M E T Q D R E F S P S R P A C A D E Y I T K N M E S Q D R E F S P N R P A E A S E  
Y S A R D V E T Q D R E L K S N K P A W D D E Y I T K N M E S R D R E F G P S R S V W A S D Y D S M N T E K G E F S S R L S W A G E C S I  
G Q T Q L A N A F G V R K E D L P G L C A P S R P G Q E S S W G S T D Q Q E S G T R D W A E L H L G G A E H Q N Q F G I I G T E R V S D P  
S S T A A S A D G L M S W A N K M R S E V P Q E F R Q P L G D W H S D L S F S T S G I T G K A D E G E F S Q M A W D E G L A A V G S S A Q P  
Q Q A K V E E P G W S Q D L E E A G W S E E L R E A E A R R Q E W A S A F G A R C A A R S Q D F S A G E Q S L G G D G G S A D G N P E N I H  
L S E S S P L G D D A V A E P A A A E P I W G E S A T P R T D P M E Q Q D L P E L A A A P L P A E A A G E T P E T E S E E A P L D S P D G  
K T P V S W E E K R L S V S A S Q P E G L L D L S G Q D F T F L E D T E V L D S T M Y R S K A N L G R K R R H R A P V L R P G A T S E G D S  
W I F Q D S T E P R P A R A A A S S D E E A A E P K S R R V R A S P S G K G V K V L P F P G L T T S A L K A K L R G R N R S V E E G A S P  
V D S K A T P T K D P H V Q R S K S C K I P G L S G K P L A L P P K P E K S S G S D A S P P H W L Q A L K L K K K K S

### **Xenopus laevis:**

No homolog found.

### **Salmo salar:**

No homolog found.

### **Petromyzon marinus:**

No homolog found.

### **Branchiostoma belcheri:**

No homolog found.

### **Drosophila melanogaster:**

No homolog found.

### **Hydra vulgaris:**

No homolog found.

### **Nematostella vectensis:**

No homolog found.

### **Amphimedon queenslandica:**

No homolog found.

|                            |                                                                 |     |
|----------------------------|-----------------------------------------------------------------|-----|
| XP_040557690.1[G.allus]    | ---MASQPQSLHPLPCASGGAGLAAGSPKESGSPRPKPPVRPKPVLVLP-KPAVPAKPCF    | 55  |
| NP_001074729.1[M.musculus] | MKGSTLREGTAMASPLPDQME-EELAPVGSSEPGDPRAPKPPVKPKPGLPSKPAKPAKPSL   | 59  |
| NP_203754.2[H.sapiens]     | MKVSTLRESSAMASPLPREME-EELVPTGSEPGDTRAKPPVPKPRPALPAKPAKPAKPSL    | 59  |
| XP_002821835.2[P.abellii]  | MKVSTLRESSAMASPLPREME-EELVPTGSEPGDTRAKPPVPKPRPALPAKPAKPAKPSL    | 59  |
|                            | : : : * * * . . . * * * * * * * * * * * * * * * *               |     |
| XP_040557690.1[G.allus]    | P---HPPAPAPRHSPRPELPSAEKINRLAGQPYSGGGSGAALR-RPSFTIK-----SPETP   | 106 |
| NP_001074729.1[M.musculus] | LVPVGPFRPPRGPLAELPSARKMMNLGAGPYGVSKRPLFPFAPRPSAEATAGGDVTDQESGK  | 119 |
| NP_203754.2[H.sapiens]     | LVPVGPFRPPRGPLAELPSARKMMNLGAGPYGVSKRPLFPFAPRPAVEASTGGEATQETGK   | 119 |
| XP_002821835.2[P.abellii]  | LVPVGPFRPPRGPLAELPSARKMMNLGAGPYGVSKRPLFPFAPRPAVEASTGGEATQETGK   | 119 |
|                            | * ** *****.* * ***** . . : * : .                                |     |
| XP_040557690.1[G.allus]    | NGKGLSPSPVVLTPEDSCSTPSDEVPLAPSTPSRKGPAPKFPVLPVPVATKLERFPFGTVEE  | 166 |
| NP_001074729.1[M.musculus] | EDGKAGDLPLPTTPARCAALG-----GVRKAPAPFRPSSERFAACTVVE               | 163 |
| NP_203754.2[H.sapiens]     | EEAGKEEPPPLTPPARCAAG-----GVRKAPAPFRPSPASERFAATTVEE              | 163 |
| XP_002821835.2[P.abellii]  | EEAGKEEPPPLTPPARCAAG-----GVRKAPAPFRPSPASERFAATTVEE              | 163 |
|                            | : * . * * * * * : : . . : : * : . : * : . : * * *               |     |
| XP_040557690.1[G.allus]    | ILAKMDS--KEGLGSPDRARL---SPFCPDSSSRFSGKSTFTAFRRRPSGEADGDSGPEARQ  | 222 |
| NP_001074729.1[M.musculus] | ILAKMEQPRKEILASPDRLWGSRLTFNHDGSSRYGPRTYGTTAPR-CPRE--EDSKSPAKRG- | 219 |
| NP_203754.2[H.sapiens]     | ILAKMEQPRKEVLASPDRLWGSRLTFNHDGSSRYGPRTYGTTAPRD--EDGSTLSRGRW-    | 220 |
| XP_002821835.2[P.abellii]  | ILAKMEQPRKEVPASPDRLWGSRLTFNHDGSSRYGPRTYGTTAPRD--EDGSTLSRGRW-    | 220 |
|                            | *****: . * .***** * ****** : : : . * : . .                      |     |
| XP_040557690.1[G.allus]    | LLQQAEGELGTGGDRCLMVE----TSSSSPAGPSGAGDCPGLRRPSPSPDLSLQLGPPG     | 278 |
| NP_001074729.1[M.musculus] | -SQ--EGTAELI-PAECQEEHKSPTPEERNLTSSPAMNGDLAKLACSEAPTDVSKTWTWSSA  | 275 |
| NP_203754.2[H.sapiens]     | -SQ--EGVPKS-PAECREHESKTPTEERSLPSDLAFNGDLAKAASSELPAISKWPISSP     | 276 |
| XP_002821835.2[P.abellii]  | -SQ--EGVPKF-PAECQEEHKTPEERSLPSDLAFNGDLAKAASSELPAISKWPISSP       | 276 |
|                            | * ** * * * * * : : : . . : * : .                                |     |
| XP_040557690.1[G.allus]    | SPRPP--ACPPPGAPFQPSASAGSPDAPPELLAPGSTPTMAPESPESPAQRPTTELL---    | 333 |
| NP_001074729.1[M.musculus] | DPVSEHGGSSTAVRLANS-----VPASESPL--SSRPSSPCHSOLSETQSPA            | 322 |
| NP_203754.2[H.sapiens]     | APSENGGSPASGLPAEAS-----GSGPSCPHLHPDKSSPCHSOLLEAQTPE             | 324 |
| XP_002821835.2[P.abellii]  | APSENGGSPASGLPAEAS-----GSGPSCPHLHPDKSSPCHSOLLEAQSPE             | 324 |
|                            | * : : * : * : * : * : * : * : * : *                             |     |
| XP_040557690.1[G.allus]    | ---ATSIQ---APGAPSSVAEPWLGASHSPGSPHTPSEGSPTPASSTPGTSLSPKATC      | 387 |
| NP_001074729.1[M.musculus] | ASEASSICLVTPASPASAV-LP-----AEPGHSPSSSPLPAEAAETPLSPNNSPVE-       | 372 |
| NP_203754.2[H.sapiens]     | ASQA-SPCPAVTSPASFAA-LP-----DEGSRHTPSGLPAEGAPEAPRPSPPPE-         | 373 |
| XP_002821835.2[P.abellii]  | ASQA-SPCSPVTPATPASA-LP-----DEGSRHTPSGLPAEGAPEAPRPSPPPE-         | 373 |
|                            | * * : * : * * : * * * : * : * : . : .                           |     |
| XP_040557690.1[G.allus]    | PPGSPESATEPSPPPSPPELPARASCPPGSPGGDDSLVSSQTEGPDFS-----LPPSN      | 443 |
| NP_001074729.1[M.musculus] | -----TVSGHHSPEQPPVLLPQLLT-----EGAEVL-DITRTFFCGEEAAAGHTESLR      | 420 |
| NP_203754.2[H.sapiens]     | -----VL-EPHSLDQPPATSPRPLI-----EVGELL-DLTRTFPSGEEEEAKGDAHLRP     | 420 |
| XP_002821835.2[P.abellii]  | -----VL-EPHSLDQPPATSPQFVI-----EVGELL-DLTRTFPSGEEEEAKGDAHLRP     | 420 |
|                            | ***** : * : * : * : * : * : * : *                               |     |
| XP_040557690.1[G.allus]    | RDSGLRRSSEGVLRPPPEGGGMGLLGGSLGALPQPGDL---PAEHLSSGESSWSLSQS      | 499 |
| NP_001074729.1[M.musculus] | SSLAQRRFSEGVLPQPSQD---QEKLGGSLATLPQGGQSALDRPFGSGTESNWSLSQS      | 477 |
| NP_203754.2[H.sapiens]     | TSLVQRRFSEGVLPQPSQD---QEKLGGSALALPQGGQSALALDRPFG--AESNWSLSQS    | 475 |
| XP_002821835.2[P.abellii]  | TSLVQRRFSEGVLPQPSQD---QEKLGGSALALPQGGQSALALDRPFG--AESNWSLSQS    | 475 |
|                            | . * : * * * * : * : : * * * : * * * . . * * * * *               |     |
| XP_040557690.1[G.allus]    | FEWTFPTTR---GVRGLPSPRPSPIQEAADSGLSEEDSD-----REGAAT-----         | 541 |
| NP_001074729.1[M.musculus] | FEWTFPTTRPSGLGVWRDLSPPPSPITEASEAAEAADSWAVSGRGESVQVGQPTTAP       | 537 |
| NP_203754.2[H.sapiens]     | FEWTFPTTRPSGLGVWRDLSPPPSPITEASEAAEAAGNLAIVSSREEGVQSQGAGSAP      | 535 |
| XP_002821835.2[P.abellii]  | FEWTFPTTRPSGLGVWRDLSPPPSPITEASEAAEAAGNLAIVSSGEEGVQSQGAGSAP      | 535 |
|                            | ***** * * * * * * * * * * * : * : *                             |     |
| XP_040557690.1[G.allus]    | -----GSHGDSGTDGPGLAVTSSWGAEG-----APCPGPGVAQQEAESS               | 581 |
| NP_001074729.1[M.musculus] | ESPRKPSIGVQG--NDPGISLPQRDDGESQSPRSPALLP---STVEGPPGAPILLQAKENYE  | 592 |
| NP_203754.2[H.sapiens]     | SGS--GSSWVQG--DDPMSMLTKQGDGSEQQPFPVAPVLEPLPTTEGTGFLPLQQAERYE    | 591 |
| XP_002821835.2[P.abellii]  | SGS--GSSWVQG--DDPMSMLTKQGDGSEQQPFPVAPVLEPLPTTEGTGFLPLQQAERYE    | 591 |
|                            | * . * : * : : . . * . * * * * * : * : *                         |     |
| XP_040557690.1[G.allus]    | EEEEEEGE-----AELDSTELHIVEPSLDSAEPEPPVKAAPDPAPTEADASCEPTGDFP     | 636 |
| NP_001074729.1[M.musculus] | DQEPVLVGHESPIITLAAREALPVLEPALQGGQPTFS-----DQPCILFVDVP           | 639 |
| NP_203754.2[H.sapiens]     | SQEPPLAGQESPLPLATREAAFLPLEVLVGLQEQPAP-----DQPCVLFDAP            | 638 |
| XP_002821835.2[P.abellii]  | SQEPPLAGQESPLPLATREAAFLPLEVLVGLQEQPAP-----DQPCVLFDAPV           | 638 |
|                            | .* * . : * : * * * * * . * * * *                                |     |
| XP_040557690.1[G.allus]    | ASLQGLGG-----PGQDEGSSKGPDAHTDPRWLTELLASPRARASG                  | 677 |
| NP_001074729.1[M.musculus] | DPEQALSTEDDVTLGWAETTLPTMTAEPQCPSPVEPTGESSRWLDDLASSPPNNGS        | 698 |
| NP_203754.2[H.sapiens]     | EPQALPVVEEAVALTARAETQTARTEAQDLCRASPEPPGPESSRWLDDLASSPPSGGG      | 699 |
| XP_002821835.2[P.abellii]  | EPQALPVVEEAAMTLARAETQTARTEAQDLCRASPEPPGPESSRWLDDLASSPPSGGS      | 698 |

|                            |                                                               |      |
|----------------------------|---------------------------------------------------------------|------|
| NF_001074729.1[M.musculus] | CGQSGEGS-----TREWASRHSLGQ-----EVIGIGSQDESEV-----P---VRERA     | 819  |
| NF_203754.2[H.sapiens]     | YGQGAGEGS-----TREWASRCGIGQ-----EEMEASSSQDQSKVS-APGVLT---AQDRV | 824  |
| XP_002821835.2[P.abelii]   | YGQGAGEGS-----TRDWASRCGIGQ-----EEMEASSSQDQSEVS-APGALT---AQDRV | 824  |
|                            | * * . . . * .: .: . * : .: .: *                               |      |
| XP_040557690.1[G.gallus]   | PGWAGKYGSGDLETHSGDAAPVWSSEYGTGDADIKDREVT-PDWASKYSSRDAETKDKDF  | 906  |
| NF_001074729.1[M.musculus] | VGRPAQLGA-----QG-LEADAQQWFGKRESQDPHSIHDKELQDQEF               | 861  |
| NF_203754.2[H.sapiens]     | VGKPAQLGT-----QRSQEAADVQDWEFRKRDSQGTYSRRDAELQDQEF             | 867  |
| XP_002821835.2[P.abelii]   | VGKPAQLGT-----QRSQEAADVQDWEFRKRDSQGTYSRRDAELQDQEF             | 867  |
|                            | * .: *: : ** : : * . : . : * : * : *: *                       |      |
| XP_040557690.1[G.gallus]   | TLGWAGRSSTGDAGTLDKEFCSSRSASWDSKYSTRDMESQDREFSPSRPAWSGEYSTQDME | 966  |
| NF_001074729.1[M.musculus] | GKR-----DSL-----GSFSTRDASLQDWEFGKR--ASVSTN--QDTE              | 895  |
| NF_203754.2[H.sapiens]     | GKR-----DSL-----GTYSRRDVS LGDWEFGKR--DSL GAYASQDAN            | 903  |
| XP_002821835.2[P.abelii]   | GKR-----DSL-----GTYSRRDVS LGDWEFGKR--DSL GTYASQDVN            | 903  |
|                            | . * .: * : * . .: * : * . .: * : *                            |      |
| XP_040557690.1[G.gallus]   | SQDREFSPSRLAEASEYSSRDMEIQDREFSPSRPACAEHSTSDMESQDREFSTSRPTWH   | 1026 |
| NF_001074729.1[M.musculus] | ENDQELGMK--NLSRGYSSQDAEEQDREFEKRDSV-LDIHGSRAQAQQNQE--GKSAWF   | 950  |
| NF_203754.2[H.sapiens]     | EQGQDLGKR--DHHGRYSSQDAEQDWEFQKRDSV-LGTYGSRAAEPQE--GKSAWI      | 958  |
| XP_002821835.2[P.abelii]   | EQGQDLGKR--DHRGRYSSQDAEQDWKFQKRDSV-LGTYGSRGAEPQE--GKSAWI      | 958  |
|                            | .: .: .: .: * : * : * : * . : : * : * : * : *                 |      |
| XP_040557690.1[G.gallus]   | REYSSR----DMESQDREFSPSRPACTNEYSTDAETQDREFNFSRPTWHSEYSSRDME    | 1081 |
| NF_001074729.1[M.musculus] | QDYSSGGGSRVLGSGERGFGRS--LSSGFSPEEAQQQDEEFKKT FVGEDRFCEASRD    | 1008 |
| NF_203754.2[H.sapiens]     | RDYSSGG--SSRTLDAQDRSFGTRP--LSSGFSPEEAQQQDEEFKKTIPSVEDSLGEGSRD | 1015 |
| XP_002821835.2[P.abelii]   | RDYSSGG--SSRTLDAQDRSFGTRP--LSSGFSPEEAQQQDEEFKKTIPSVEDSLGEGSRD | 1015 |
|                            | : : * * : : * : * . : . : * : * : * : * : * . : . :           |      |
| XP_040557690.1[G.gallus]   | -----TQDREFSPSRPACADEYITKNMESQ--DREFSPN--R---PAEASEYSARDVE    | 1127 |
| NF_001074729.1[M.musculus] | VGHLEEGASGGLLSPSTPHSRDGAARPKDEGSWQDGDSSQETRLQGRMQAESQSPTNVD   | 1068 |
| NF_203754.2[H.sapiens]     | AGRPGERGGGLFSPSTAHVPD GALQRDQSSWQNSDASQEVGGHQRQAGAGPGSAD      | 1075 |
| XP_002821835.2[P.abelii]   | AGRPGERESGGLFSPSTAHVPD GALQRDQSSWQNSDASQEVGGHQRQAGAGPGSAD     | 1075 |
|                            | . . : * * * * * * . : .: .: * : * : * : *                     |      |
| XP_040557690.1[G.gallus]   | TQDRELKSNKPANDDEYITKNMESRDREFGFSRSVWASDYDSMNTKEGFSSSRLSWAGE   | 1187 |
| NF_001074729.1[M.musculus] | LED--KEREQRGWAGEFSLGVAAQSEAAFS PG-----                        | 1098 |
| NF_203754.2[H.sapiens]     | LED--GEMGKRGWVGFSLSVGPQREAAFS PG-----                         | 1105 |
| XP_002821835.2[P.abelii]   | LED--GEMGKRGWVGFSLSVGPQREAAFS PG-----                         | 1105 |
|                            | : * : : . * : * : : * : *                                     |      |
| XP_040557690.1[G.gallus]   | CSIGQTQLANAFGVRKEDLPGLCAPSRPGQESSWGSTDQQESGTRDWAEELHLGAEHQN   | 1247 |
| NF_001074729.1[M.musculus] | -----RQDWSRDVCVEASESSY                                        | 1115 |
| NF_203754.2[H.sapiens]     | -----QQDWSRDFCIEASERSY                                        | 1122 |
| XP_002821835.2[P.abelii]   | -----QQDWSRDFCIEASERSY                                        | 1122 |
|                            | : * : * : . : .: * .                                          |      |
| XP_040557690.1[G.gallus]   | QFGIIGTERVSDPSSTA-----                                        | 1264 |
| NF_001074729.1[M.musculus] | QFGIIGNDRVSGAGLSPSRKSGGGHFVPPGKTKAGAVDWTDLGLRNLEVSSCVSGSGPS   | 1175 |
| NF_203754.2[H.sapiens]     | QFGIIGNDRVSGAGFSPSSKMEGGHFVPPGKTTAGSVDWTDQLGLRNLEVSSCVSGSGSS  | 1182 |
| XP_002821835.2[P.abelii]   | QFGIIGNDRVSGAGFSPSSKMEGGHFVPPGKTTAGSVDWTDQLGLRNLEVSSCVSGSGSS  | 1182 |
|                            | *****: * * . : :                                              |      |
| XP_040557690.1[G.gallus]   | ---ASADGLMSWANKMRS-----EVPQEPRQPLGDWHSDFSSTSGITGKA            | 1307 |
| NF_001074729.1[M.musculus] | EARENVVGQMGWSDSLGLNNDLARRLTGSESEEPRLGVGEKDWTSVSEARNRDLPGQA    | 1235 |
| NF_203754.2[H.sapiens]     | EARESAVGQMGWGGGLSLRDMNLTGCLSGSGSEEPGGIVGGEKDWTSVNVKSKDLAEVG   | 1242 |
| XP_002821835.2[P.abelii]   | EARENAVGQMGWGGGLSLRDMNLAGCLSGSGSEEPGGIVGGEKDWTSVNVKSKDLAEVG   | 1242 |
|                            | . . * * .: .: .: * * * * * * * : * : .: .: .                  |      |
| XP_040557690.1[G.gallus]   | DEGEPSQMAWDEGLAAGVSSAQPPQAKVEEPGWSQD-----LEEAGWSEEL--         | 1353 |
| NF_001074729.1[M.musculus] | EVG-----RHSQARES GVGEPDWSGAEAGEFLKSRERGVQADWTPDLGL            | 1280 |
| NF_203754.2[H.sapiens]     | EGG-----GHSQARES GVGQTDWSGVEAGEFLKSRERGVQADWTPDLGL            | 1287 |
| XP_002821835.2[P.abelii]   | EGG-----GHSQARES GVGQTDWSGVEAGEFLKSRERGVQADWTPDLGL            | 1287 |
|                            | : * : * : : * : * : * : * : * : *                             |      |
| XP_040557690.1[G.gallus]   | -----REAEARRQEWASAFGARCAARSQDFSAG-EQSLGGDGGS-----AD           | 1393 |
| NF_001074729.1[M.musculus] | RNMAPGAGCSPGEPRELGVQDWDGDLGLRNLEVSCDLES GGS---RGCVGQMDWAQD    | 1337 |
| NF_203754.2[H.sapiens]     | RNMAPGAVCSPGESKELGVGQMDWGNLGLRLDLEVTCDPDSGGSQGLRGCGVGQMDWTQD  | 1347 |
| XP_002821835.2[P.abelii]   | RNMAPGAVCSPGEHKELGVGQMDWGNLGLRLDLEVTCDPESGDSQGLRGCGVGQMDWTQD  | 1347 |
|                            | : * . : : * .: * * : * : * . * * . *                          |      |
| XP_040557690.1[G.gallus]   | GNPENIHLSE-----SSPPL-----GDDAVAEP                             | 1416 |
| NF_001074729.1[M.musculus] | LGLRNRLCGAPSEVRECGVGRVGPDLGLDPKSSGSLSPGLETDPLEARELGVGETSGP    | 1397 |
| NF_203754.2[H.sapiens]     | LAPQNVFLFGAPSEAREHVGVGVSQCPEPGLRHNGSLSPGLEARDPLEARELGVGETSGP  | 1407 |
| XP_002821835.2[P.abelii]   | LAPRNVFLFGAPSEAREHVGVGVSQCPEPGLRHNGSLSPGLEARDPLEARELGVGETSGP  | 1407 |
|                            | .: .: * * * * * * * : * : *                                   |      |
| XP_040557690.1[G.gallus]   | A-----AAEPIWGESA---TPRTDPMEQDLP-LAAAP----                     | 1446 |
| NF_001074729.1[M.musculus] | ETQGEDSSSPSFETPSEDGTGEAPSLGASPPSCLTRSPSGSQSLLEGIMTASSSKG      | 1457 |
| NF_203754.2[H.sapiens]     | ETQGEDYSSSSLEPHPADPGMETGEALSFGASPGRCFARPPPSGSGQLLEMLAASSSKA   | 1467 |
| XP_002821835.2[P.abelii]   | ETQGEDSSFSLEPHPADPGMETGEALSFGASPGRRPARPPPSGSGQLLEMLAASSSKA    | 1467 |
|                            | . * * * * * * .: * : * : *                                    |      |
| XP_040557690.1[G.gallus]   | -----LPAAEA--G-----E-----TPETESEAPLSDPDGK--                   | 1471 |
| NF_001074729.1[M.musculus] | APQRESAASGSRVLLLEEGLAAGAGQGEPOEPSRAPLPSS--RQPDGEASQVEVDGTWSL  | 1517 |
| NF_203754.2[H.sapiens]     | VARRESAASGLGGLLEEGAGAGAAQEEVLEPGRDSPSPSW--RQPDGEASQTEDVDGTWSG | 1527 |
| XP_002821835.2[P.abelii]   | VAQRESAASGLGGLLEEGAGAGAAQEEVLEPGRDSPSPSW--RQPDGEASQTEDVDGTWSG | 1527 |
|                            | * * . * * * * : : * : * : .: * * .                            |      |
| XP_040557690.1[G.gallus]   | -TPVSWEEKRLSV-SASQPEGL-LDLSGQDFTFLEDTEVLDSTMYRSKANLGRKRRHRAP  | 1528 |
| NF_001074729.1[M.musculus] | TGAARQNEQASAPPPRRPRLGLPSCPSDFSFIEDTEILDSAMYRSRANLGRKRGHRAP    | 1577 |
| NF_203754.2[H.sapiens]     | SAA-RWSDQGPACTSRPSQGP PARSPSQDPSFIEDTEILDSAMYRSRANLGRKRGHRAP  | 1586 |
| XP_002821835.2[P.abelii]   | SAA-RWSDQGPACTSRPSQGP PARSPSQDPSFIEDTEILDSAMYRSRANLGRKRGHRAP  | 1586 |
|                            | .: .: .: * .: * : * : * : * : * : * : *                       |      |

|                            |                                                              |      |
|----------------------------|--------------------------------------------------------------|------|
| XP_040557690.1[G.gallus]   | VLRPGAT-----SEGDSWIFQDSTEPRPARAAASDEEAAEPPKSRVRASPSKGVKV     | 1582 |
| NP_001074729.1[M.musculus] | AIRPGGTLGLSETADSDTRLFQDSTEPRASRV-PSSDEEVVEEPQSRRTMSLGTGKGLKV | 1636 |
| NP_203754.2[H.sapiens]     | VIRPGGTLGLSEAADSDAHLFQDSTEPRASRV-PSSDEEVVEEPQSRRTMSLGTGKGLKV | 1645 |
| XP_002821835.2[P.abelii]   | AIRPGGTLGLSEAADSDARLFQDSTEPRASRV-PSSDEEVVEEPQSRRTMSLGTGKGLKV | 1645 |
|                            | .:***.* :.:* :***** :* . *****.***:***.* * . **:**           |      |
| XP_040557690.1[G.gallus]   | PLFPGLTTSALKAKLRGRNRSVEEGASPVDSKATPTKDPHVQRSKSKIPGLSGKPLALP  | 1642 |
| NP_001074729.1[M.musculus] | NLFPGLSPSALKAKLRSRNRSAEEGEVTE--SKSSQKESVQRSKSKVPGL-GKPLTLP   | 1693 |
| NP_203754.2[H.sapiens]     | NLFPGLSPSALKAKLRPNRNSAEEGELAE--SKSSQKESAVQRSKSKVPGL-GKPLTLP  | 1702 |
| XP_002821835.2[P.abelii]   | NLFPGLSPSALKAKLRPNRNSAEEGEPAE--SKSSQKESAVQRSKSKVSGL-GKPLTLP  | 1702 |
|                            | *****: ***** ***.*** . : * : *****: ** ****:**               |      |
| XP_040557690.1[G.gallus]   | PKPEKSSGSDASPPHWLQALKLKKKKS                                  | 1669 |
| NP_001074729.1[M.musculus] | PKPEKSSGSEGSSPNWLQALKLKKKKI                                  | 1720 |
| NP_203754.2[H.sapiens]     | PKPEKSSGSEGSSPNWLQALKLKKKKV                                  | 1729 |
| XP_002821835.2[P.abelii]   | PKPEKSSGSEGSSPNWLQALKLKKKKV                                  | 1729 |
|                            | *****:.* *:*****                                             |      |
