# Supplementary material for: An Evolutionary Perspective on the Origin, Conservation and Binding Partner Acquisition of Tankyrases
Source: MDPI journal article supplement (doi:10.3390/biom12111688), 2022-11-15
Supplement: s1 [file s1]

# RNF146

## Homo sapiens:

>sp|Q9NTX7|RN146\_HUMAN E3 ubiquitin-protein ligase RNF146 OS=Homo sapiens OX=9606 GN=RNF146 PE=1 SV=1  
MMAGCGEIDHSINMLPTNRKANESCNTAPSLTVPECAICLQTCVHPVSLPCKHVFCYLCVKGASWLKKRC  
VKGASWLKKRCALCRQEIPEDFLDKPTLLSPEELKAASRGNGEYAWYYEGRNGWQYDER  
TSRELEDAFSKGGKNTLEIAGFLYVADLENMVQYRRNEHGRRRRIKRDIIIDIPKKGAVAG  
LRLDCDANTVNLA**RESSADGAD**SVSAQSGASVQPLVSSVRPLTSVDGQLTSPATPSPDAS  
TSLEDSFAHLQLSGDNTAE**RSHRGE**EDHESPSSGRVPAPDTSIEETESDASSDSEDVS  
AVVAQHSLTQQRLVSNANQTVPDRSDRSGTD**RSVA**GGGTVSVSV**RSRRPDGQC**TVTEV

## Pongo abelii:

>NP\_001128751.1 E3 ubiquitin-protein ligase RNF146 [Pongo abelii]  
MAGCGEIDHSINMLPTNRKANESCNTAPSLTVPECAICLQTCVHPVSLPCKHVFCYLCVKGASWLKKRC  
ALCRQEIPEDFLDKPTLLSPEELKAASRGNGEYAWYYEGRNGWQYDERTSRELEDAFSKGGKNTLEIAG  
FLYVADLENMVQYRRNEHGRRRRIKRDIIIDIPKKGAVAGLRLDCDANTVNLA**RESSADGAD**SVSAQSGAS  
VQPLVSSVRPLTSVDGQLTSPATPSPDASTSLEDSFAHLQLSGDNTAE**RSHRGE**EDHESPSSGRVPAP  
DTSIEETESDASSDSEDVAVVAQHSLTQQRLVSNANQTVPDRSDRSGTD**RSVA**GGGTVSVSV**RSRRPD**  
**GQC**TVTEV

## Mus musculus:

>BAE31549.1 unnamed protein product [Mus musculus]  
MEMAGCGEIDHSINMLPTNRKANESCNTAPSLTVPECAICLQTCVHPVSLPCKHVFCYLCVKGASWLKKRC  
ALCRQEIPEDFLDKPTLLSPEELKAASRGNGEYAWYYEGRNGWQYDERTSRELEDAFSKGGKNTLEIAG  
FLYVADLENMVQYRRNEHGRRRRIKRDIIIDIPKKGAVAGLRLDCDNTNVNLA**RESSADGAD**SGSAQTG  
ASVQLAVPSSSTRPLTSVDGQLTSPVTPSPDAGISLEDSFAHLQLSGDSIAE**RSHRGE**EDHESPSSGRV  
PDTSEETESDASSDSEDAPVVVAQHSLTQQRLVPLVFNQNTVADQSDRSGTD**RSVA**GGGTVMSVNV**RSRRP**  
**DGQC**TVTEV

## Gallus gallus:

>XP\_015139929.3 E3 ubiquitin-protein ligase RNF146 [Gallus gallus]  
MAGCGEIDHSINMLPTNRKNTNESCANAAAPSLTVPECAICLQTCVHPVSLPCKHVFCYLCVKGASWLKKRC  
ALCRQEIPEDFLDKPTLLSPEELKAASRGNGEYAWYYEGRNGWQYDERTSRELEDAFSKGGKSTLEMLIA  
GFLYIADLENMVQYRRNEHGRRRRIKRDIIIDIPKKGAVAGLRLDCDNTNVNLA**RESSADGAD**SLTGGAAA  
VQPLVPVPSARPLPSLDGQLMSPSTPSPDASTSLENSFAHLQINGDSMAE**RSHRGE**EDHESSSSGRVPAP  
PDTSEETESDASSDSEDVSAFLQQHPSSAQQRHLNANANQSGAD**RSVA**GGGANASV**RSRRPDGQC**TVT  
EV

## Xenopus laevis:

>XP\_018118669.1 E3 ubiquitin-protein ligase rnf146 [Xenopus laevis]  
MAGCGEVSHSANMLPTNKKLGPECSNAPSSSVPECAICLQICVHPVSLPCKHIFCYLCVKGASWLKKRC  
ALCRQEIPEDFLDKPTLLSPEELKSASRGNGEYAWYYEGRNGWQYDERTSRELEDAFTKGGKSTLEMLIA  
GFLYIADLENMVQYRRNEHGRRRRIKRDIVDIPKKGAVAGLRLCEDPANLNLA**RESSADGAD**NMAALGASS  
SQPAPVLPARLHTSLTTASQVLSHSDVTNSLENSFAELQIGDPVIC**RNNIGE**EGGQPLINPRMPFPNA  
VLEEPEPSSDSNDHGSFALQHHSFLGNP

## Salmo salar:

>NP\_001167373.1 E3 ubiquitin-protein ligase rnf146 [Salmo salar]  
MASCGEVDHSVSLPSSKSGSDSACSGSSSPALPVEPECAICLQSCVHPVQLPCRHVFCFLVKGASW  
QSKRCALCRQEVPEDFLEHPTLLSPEELKTGGRGATGDNAWYYEGRNGWQYDERTSRELEDAFTKGGKKT  
AEMLIAGFLYVADLENMVQYRRNEHGRRRRIKRDIVDIPKKGAVAGLRLDEGGVQGSAAAG**RNSADGAD**  
TSAAAVQAAAAAATTVLSAPARPPTSLGGQPGSPTSPLEDTALLHISPTDAPE**AEVGE**EEEAATA  
TPSMSSSPNTYADGSGDWSDDDEGDGEAVPEPQRLRLGESLVDRSPPGAEESSSSSV**RSRRPDGQC**TEV

## Petromyzon marinus:

>tr|S4R4W7|S4R4W7\_PETMA E3 ubiquitin-protein ligase OS=Petromyzon marinus OX=7757 PE=4 SV=1  
VPDCAICLQPCVHPARLPCRHVFCFLCAKGVALQSRRCALCRSEIPPDFLERPTLLCSTS  
DGVPLKPRTANAWYYEGRNGWQYDERTSAELEAFARGSTTMEMLIAGLYVADLEAMV  
QYRRSEPSRRRRMKRDLLSAPKKGVAGLRLDLTAPAVSPAHASGVGDVDRAVAGTSSGSG  
SVVAGGLLASAGPSTITVASPSPVSVATSSTLSVDPLFDSGATSSFPSPRPATFAPQHQ  
MRAVVGPPSPADSDSDRDEEDQYEDNEGAASISRQLAGM**RLGRSGAV**IDTAAEQQSS  
AAPRSATLHVRS**RDGRPDGQY**TVTDV

## Branchiostoma belcheri:

>XP\_019623976.1 PREDICTED: E3 ubiquitin-protein ligase rnf146-like [Branchiostoma belcheri]  
MAESRSVASAETSLSQSSAKKRREKEMABTATGQKPGGEMIPCAVCLQTCVQPVRLPCTHIFCYLCV  
KVAVQSKRCALCRQEIPIEYLERPELVKPIKVTEQEGEEEEVYCWFEYGRNGWQYDERTNABLEDA  
YTKKSGSCELLLAGFLYIIDFVNMLQFRRNDPSRRRIKRDLTNTPKKGAVAGVRLPAPAP**MAPADGVE**  
GANEAGTGGSRSAVTSRATKSTRGPADHEDDSNEDTNRAEEDSTSIEDVTDQSARGNARQSPDSLQHQ  
TPTQEEDDGDGTNSTGGAEMSEVMRL**RSRLGRGSH**SSRSGLVLAVLQGQVSSVANVMA**REEIFGDS**  
DESD

## Drosophila melanogaster:

>tr|B7Z078|B7Z078\_DROME E3 ubiquitin-protein ligase OS=Drosophila melanogaster OX=7227 GN=Rnf146 PE=2 SV=1  
MSQQRSTEQIAASNNNTSDVIALDDDEDTDVQVFAALRPTAPVIDLCVSPSTSAAAAA  
AAAAHSGGGSGEDPAVGASGASGAASDSDSLASSPDEGALATGVDAAAAVSGEDSPSAAAA  
ALECPICLQTCIHPARLPCGHIFCFLCVKGAVAYKNRRCAKCRREIPAFLDHPQLVNGIE  
DICTT**RATEDGQY**WYYEGRNGWQYDDRTSQDIEDAFKGDKSCITILVAGVYIYVDLEQL  
VQQRQNEPTRCRVRKDLATIPKKGAVAGLRIEGNQVTSDTVFSRPTNTANPTTVAAAASS  
FISTIAATDAARIASDIIGSTLAHADELTRGLTASNLDLSSGQSNSNTNSNDAGRS  
PASSPASSMQDLITRDLRNTQQVIAHNQHTIDLFEQALNDFQALAMRNYVSSDSEENN  
QDQEHRLRE**REQLAGGQY**QPSNDNPQR

## Hydra vulgaris:

>XP\_01255516.1 E3 ubiquitin-protein ligase rnf146 [Hydra vulgaris]

MTYCWVDSNPDCAVCLQQCLQPVQLPCKHIFCFLCLKGFAYRSKRCALCRSVIELEYFNNPIIHKVREKE  
DVSSSTSNKVSVNLSPTSITYNWFYEGRNGWQYDERASLILEKAFSNSKKNCIELIAGFLYVVDFERMV  
QYRKDNLARLRKVKRDSDDTLKGVAGIKLPKEIENKPD SKNVINKKELLTNTSDQLNNNQETLATERP  
FINLASDLSQNSSGVNEVLYGIQQVALKD

### Nematostella vectensis:

>XP\_048581887.1 E3 ubiquitin-protein ligase rnf146 isoform X1 [Nematostella vectensis]  
MAEGPENVKERQSDISSSKEDVSDSAEPVKNAVVVHLSTPRYLVSYCCIFGDTSEEEVLQNI FELDYQPD  
CPVCLQQA SYFVRLPCGHMFCFLCIKGVALKSRKCAICRQPISPDYLDKPTLVKVVSGQSSSDKAPSDP  
PADEVVWFYEGRNGWQYDTRKTSKEVESAFKGGKRSC TLLIAGFLYLIDFENMFQMRNEFGRRRIKRD  
KPNAD **RKGAGITL** LKGLTVSELADLKNQTTETSTADNQW TSTEDVSVQALSGSPTEAANRD CDD SASSTS  
DKESAPDETTFEACFMLMQPLIAHSESYHNSPVLGDVNAPS

### Amphimedon queenslandica:

>XP\_003383131.1 PREDICTED: E3 ubiquitin-protein ligase RNF146-like [Amphimedon queenslandica]  
MADSENSKKQGQYGD SKSLEEKKKKSES LDKEGDRVVQVEKDLSKLKIKEDIVPFDMKCPICQDKSRHP  
LTLPCGHTFCYLCIKGVYARQKV CALCRQAIPQH CIVSPPGTGE **REEEEGRK**TCWY YEA KSGGWWEYEE R  
VRQELEIHYQSLQINNEDNQDQGQFVIYVSGFPYVVDFAKMIQYRQDKPNRSRRRIKREKGVAAEEGELVR  
GVAGIPIAPSI RQDDN

## Alignment

|                                  |                                                                |     |
|----------------------------------|----------------------------------------------------------------|-----|
| Q9NTX7 [H.sapiens]               | -----MMAGC-----                                                | 5   |
| NP_001128751.1 [P.abelii]        | -----MAGC-----                                                 | 4   |
| BAE31549.1 [M.musculus]          | -----MEMAGC-----                                               | 6   |
| XP_015139929.3 [G.gallus]        | -----MAGC-----                                                 | 4   |
| XP_018118669.1 [X.laevis]        | -----MAGC-----                                                 | 4   |
| NP_001167373.1 [S.salar]         | -----MASC-----                                                 | 4   |
| XP_032825805.1 [P.marinus]       | -----MSGC-----                                                 | 4   |
| XP_019623976.1 [B.belcheri]      | MAESRS-----VASAETSLRQSSAK-----KR-----                          | 22  |
| AAI48063.1 [D.melanogaster]      | MSQQRSTEQIAASNNTSDVIALDDD-----ED-TDVQFVAALRPTAPVIDLCVSPSTSA    | 54  |
| XP_012555516.1 [H.vulgaris]      | -----                                                          | 0   |
| XP_048581887.1 [N.vectensis]     | MAEGPENVK-----ERQSDISSSKEDVSDSAEPVKNAVYVY-LSTPRYLVSYC-----     | 47  |
| XP_003383131.1 [A.queenslandica] | -----MA-----                                                   | 2   |
| Q9NTX7 [H.sapiens]               | -----GEIDHSINMLPTNRK-----ANES-----CSN-----                     | 27  |
| NP_001128751.1 [P.abelii]        | -----GEIDHSINMLPTNRK-----ANES-----CSN-----                     | 26  |
| BAE31549.1 [M.musculus]          | -----GEIDHSINMLPTNKK-----ANES-----CSN-----                     | 28  |
| XP_015139929.3 [G.gallus]        | -----GEIDHSINMLPTNRK-----TNES-----CAN-----                     | 26  |
| XP_018118669.1 [X.laevis]        | -----GEVSHSANMLPTNKK-----LGEP-----CSN-----                     | 26  |
| NP_001167373.1 [S.salar]         | -----GEVDHSVSSLPSKK-----GSGDSACSGSSG-----                      | 31  |
| XP_032825805.1 [P.marinus]       | -----RVLTGDEP--P-----SAGVGPGEA-----                            | 22  |
| XP_019623976.1 [B.belcheri]      | -----REKEEMA-----ETATGQK-----                                  | 36  |
| AAI48063.1 [D.melanogaster]      | AAAAAAAAAHSGGGSGEDPAVGSASGAAASDTSLASSPDEGALATGVDAAAVSGEDS      | 114 |
| XP_012555516.1 [H.vulgaris]      | -----MT-----                                                   | 2   |
| XP_048581887.1 [N.vectensis]     | -----CIFGDTE-----EEEVQN-----                                   | 61  |
| XP_003383131.1 [A.queenslandica] | -----DSENSKKGQYGDSSKLEE--KEKKRKSESL---DKEGDRVVQVEKD-LSKLKIK    | 50  |
| Q9NTX7 [H.sapiens]               | TAPSLTVPECAICLQTCVHPVSLPCKHVFICYLCVKGASWLGRKRCALCRQEIPEDFLDKPT | 87  |
| NP_001128751.1 [P.abelii]        | TAPSLTVPECAICLQTCVHPVSLPCKHVFICYLCVKGASWLGRKRCALCRQEIPEDFLDKPT | 86  |
| BAE31549.1 [M.musculus]          | TAPSLTVPECAICLQTCVHPVSLPCKHVFICYLCVKGASWLGRKRCALCRQEIPEDFLDKPT | 88  |
| XP_015139929.3 [G.gallus]        | AAPSLTVPECAICLQTCVHPVSLPCKHVFICYLCVKGASWLGRKRCALCRQEIPEDFLDKPT | 86  |
| XP_018118669.1 [X.laevis]        | SAPSSSVPECAICLQTCVHPVSLPCKHVFICYLCVKGASWLGRKRCALCRQEIPEDFLDKPT | 86  |
| NP_001167373.1 [S.salar]         | SSPALVPPECAICLQSCVHPVQLPCRHFVFCFLCVKGASWQSKRCALCRQEVPEDFLEHPT  | 91  |
| XP_032825805.1 [P.marinus]       | PPARPVVPECAICLQSCVHPARLPCRHFVFCFLCAKGVALQSRRCALCRSEIIPDFLERPT  | 82  |
| XP_019623976.1 [B.belcheri]      | PGGEDMIPECAVCLQTCVQVPRLPCTHIFCYLCVKGVANQSKRCALCRQEIPIEYLERPE   | 174 |
| AAI48063.1 [D.melanogaster]      | PSAAAALECPICLQTCIHPARLPCGHIFCFLCVKGAVYNRRRCAMCRREIPAEFLDHPQ    | 96  |
| XP_012555516.1 [H.vulgaris]      | YCWVDSNPDCAVCLQCCQLPVQLPCKHIFCFLCLKGFAYSKRRCALCRSVIELEYFNNPI   | 62  |
| XP_048581887.1 [N.vectensis]     | IFELDYQDPCVCLQQASYVPRVLP CGHMFCLCIKGVALSRKCAICRQPISPDYLDKPT    | 121 |
| XP_003383131.1 [A.queenslandica] | EDIVPFDMKCPICQDKSRHPLTGPCHTFCYLCIKGVYARQKVCALCRQAI PQHCVTSPP   | 110 |
|                                  | . : * : . * * * * * : * : * : * : * : . : *                    |     |
| Q9NTX7 [H.sapiens]               | LLSPEELK-----AASR-----G-NGEYAWYIEGR-NGWMQYDERTS                | 122 |
| NP_001128751.1 [P.abelii]        | LLSPEELK-----AASR-----G-NGEYAWYIEGR-NGWMQYDERTS                | 121 |
| BAE31549.1 [M.musculus]          | LLSPEELK-----AASR-----G-NGEYAWYIEGR-NGWMQYDERTS                | 123 |
| XP_015139929.3 [G.gallus]        | LLSPEELK-----AASR-----G-NGEYAWYIEGR-NGWMQYDERTS                | 121 |
| XP_018118669.1 [X.laevis]        | LLSPEELK-----SASR-----G-NGEYAWYIEGR-NGWMQYDERTS                | 121 |
| NP_001167373.1 [S.salar]         | LLSPEELK-----TGGR-----GATGDNAMYIEGR-NGWMQYDERTS                | 127 |
| XP_032825805.1 [P.marinus]       | LLCSTSDGQPLAQQQRRPSASMGVAGGASEGVPLKPRATANAMYIEGR-NGWMQYDERTS   | 141 |
| XP_019623976.1 [B.belcheri]      | LVKPIKVTEEQ-----E-----GEEEEVYCWYIEGR-NGWMQYDERTN               | 134 |
| AAI48063.1 [D.melanogaster]      | LVNGIEDICTT-----RATEDFGWYIEGR-NGWMQYDERTS                      | 210 |
| XP_012555516.1 [H.vulgaris]      | LIKVKREKEDVSSSTSNKVSVN-----LSTPSITYNWFYIEGR-NGWMQYDERAS        | 109 |
| XP_048581887.1 [N.vectensis]     | LVKVVSGQSSSSD-----KAP-----SDPPADEYVWFYIEGR-NGWMQYDRTKS         | 163 |
| XP_003383131.1 [A.queenslandica] | GTGERE-----EEEGRKTCWYIEAKSGGWYIEERVIR                          | 142 |
|                                  | . : * : . * * * * * : * : * : * : * : . : *                    |     |
| Q9NTX7 [H.sapiens]               | RELEDAFSKG-----KKNTEMLIAGFLYVADLENMVQYRRNEHGRRRRIKRDIDI        | 173 |
| NP_001128751.1 [P.abelii]        | RELEDAFSKG-----KKNTEMLIAGFLYVADLENMVQYRRNEHGRRRRIKRDIDI        | 172 |
| BAE31549.1 [M.musculus]          | RELEDAFSKG-----KKNTEMLIAGFLYVADLENMVQYRRNEHGRRRRIKRDIDI        | 174 |
| XP_015139929.3 [G.gallus]        | RELEDAFSKG-----KKSTEMLIAGFLYVADLENMVQYRRNEHGRRRRIKRDIDI        | 172 |
| XP_018118669.1 [X.laevis]        | RELEDAFTKG-----KKSTEMLIAGFLYVADLENMVQYRRNEHGRRRRIKRDIVDI       | 172 |
| NP_001167373.1 [S.salar]         | RELEDAFSKG-----KKTAEMLIAGFLYVADLENMVQYRRNEHGRRRRIKRDIVDI       | 178 |
| XP_032825805.1 [P.marinus]       | AELEEAFAARG-----STTMEMLIAGFLYVADLEAMVQYRRSEPSRRRMKRDLLSA       | 192 |
| XP_019623976.1 [B.belcheri]      | AELDAYTKK-----KKSCCELLIAGFLYIIDFVNMQLFRNDPSRRRIKRDLTNT         | 185 |
| AAI48063.1 [D.melanogaster]      | QDIEDAFKKG-----DKSCTILVAGVYVVVDLEQLVQQRQNEPTRCRVRKRDLATI       | 261 |
| XP_012555516.1 [H.vulgaris]      | LILEKAFSNS-----KKNCEILIAGFLYVVDFERMVQYRKDNLARLKRVRKSDSDST      | 160 |
| XP_048581887.1 [N.vectensis]     | KEVESAFKGG-----KRSCTLLIAGFLYLIDFENFMQRRNEPGRRRRIKRDKPNA        | 214 |
| XP_003383131.1 [A.queenslandica] | QLELIHYQSLQINNEDNQDQGQFVIYVSGFFVVDFAKMIQYRQDKPNRSRIKREKQVA     | 202 |
|                                  | . : * : . : * : * : * : * : * : . : * : * : * : * : . : *      |     |
| Q9NTX7 [H.sapiens]               | P-----KKGVAGLRLCDANTVNL---ARESSADGADSVSAQS-----                | 208 |
| NP_001128751.1 [P.abelii]        | P-----KKGVAGLRLCDANTVNL---ARESSADGADSVSAQS-----                | 207 |
| BAE31549.1 [M.musculus]          | P-----KKGVAGLRLCDTNTVNL---ARESSADGADSGSAQT-----                | 209 |
| XP_015139929.3 [G.gallus]        | P-----KKGVAGLRLCDTNSVNL---ARESSADGADSTLTGG-----                | 207 |
| XP_018118669.1 [X.laevis]        | P-----KKGVAGLRLECDPANLNL---ARESSADGADNMALG-----                | 207 |
| NP_001167373.1 [S.salar]         | P-----KKGVAGLRLDTEGGVQGSAAACRGNSADGADTSAAAVQAAA-----           | 220 |
| XP_032825805.1 [P.marinus]       | P-----KKGVAGLRDLDTAPAVSPA---HASGVGDVDRAVAGTSSGSGSVVAGGFSMLSS   | 244 |
| XP_019623976.1 [B.belcheri]      | P-----KKGVAGVRLPAPAPRNAP---ADGVGEGAGEGATGSSRS---VAVTSRATKST    | 223 |
| AAI48063.1 [D.melanogaster]      | P-----KKGVAGLRLEQVTSDFVFS---RPTNTANPTTVAAASS-----FIST          | 304 |
| XP_012555516.1 [H.vulgaris]      | D-----LKGVAGIKLPKEIENKP-D---SKNVINKKELLTNTSDN-----             | 196 |
| XP_048581887.1 [N.vectensis]     | D-----RKGVAGIRLKLTVSRELAD---LKNQT---TETSTADN-----              | 247 |
| XP_003383131.1 [A.queenslandica] | EEGEELVRGVAGIPIAPSIRQDDN-----                                  | 226 |
|                                  | . : * * * : .                                                  |     |
| Q9NTX7 [H.sapiens]               | -----GASVQPLV-SSVRPLTSSVDGQ---LTSFA-----                       | 233 |
| NP_001128751.1 [P.abelii]        | -----GASVQPLV-SSVRPLTSSVDGQ---LTSFA-----                       | 232 |
| BAE31549.1 [M.musculus]          | -----GASVQLAVPSSTRPLTSSVDGQ---LTSFV-----                       | 235 |
| XP_015139929.3 [G.gallus]        | -----AAAVQPLVPVSARPLPLSLDGQ---LMSPS-----                       | 233 |
| XP_018118669.1 [X.laevis]        | -----ASSSQPAPVLPARLHTSLT-T---TASQV-----                        | 232 |
| NP_001167373.1 [S.salar]         | -----AAPAATTVLSAPARPPTSLGGQ---LCSPT-----                       | 247 |
| XP_032825805.1 [P.marinus]       | AASVSSSGLSAAALGVSSAAGGVSASGGLLASAGPSTITVASPSSPVSSVATS---STLSV  | 302 |
| XP_019623976.1 [B.belcheri]      | RGPADHEDDSDNEDTNNR-----AE---EDSTSEDVTDQSARGN---ARQSP           | 272 |
| AAI48063.1 [D.melanogaster]      | IAA-----TDAAIRIASDIIGSTLAHADEL-T---RGLTASN-LNDDLSSSDSFSICT     | 352 |
| XP_012555516.1 [H.vulgaris]      | -----QLNNQET-----LA-----                                       | 206 |
| XP_048581887.1 [N.vectensis]     | -----QWTSTEDV-----SVQALSGS---PTEA-----                         | 267 |
| XP_003383131.1 [A.queenslandica] | -----                                                          | 226 |
| Q9NTX7 [H.sapiens]               | TPSPDAST-----SLEDSFAHLQL-----SGDNTAE---RSH--RGELEE---DHESP-    | 273 |
| NP_001128751.1 [P.abelii]        | TPSPDAST-----SLEDSFAHLQL-----SGDNTAE---RSH--RGELEE---DHESP-    | 272 |
| BAE31549.1 [M.musculus]          | TPSPDAGI-----SLEDSFAHLQL-----SGDSIAE---RSH--RGELEE---DHESP-    | 275 |
| XP_015139929.3 [G.gallus]        | TPSPDAST-----SLENSFAHLQI-----NGDSMAE---RSH--RGELEE---DHESP-    | 273 |
| XP_018118669.1 [X.laevis]        | LSHSDVTN-----SLENSFAELQI-----GD-FVIG---RNN--IGELEE---GQPL--    | 270 |
| NP_001167373.1 [S.salar]         | S-----P-----SLEDTLALLHI-----SPTDAPE---RAE--VGELEE---EATAT-     | 281 |
| XP_032825805.1 [P.marinus]       | DPLPDSGATSSFP-SRPATFAPQHQMRAVFPSPADSDSSD-RDDEQDYEDNEGAA        | 359 |
| XP_019623976.1 [B.belcheri]      | D-----SL---RQ---HTPTQEEDDDGDTNSTGGAE-SE-----                   | 302 |
| AAI48063.1 [D.melanogaster]      | PPLLLT-AKCVFVASLISTV-YLKLY-----                                | 376 |
| XP_012555516.1 [H.vulgaris]      | -----T---ERFPFINASDLQNSSGVNEVLYG-----                          | 231 |
| XP_048581887.1 [N.vectensis]     | -----A---NRDCDSASSTSDKESAPDETTHE-----                          | 292 |
| XP_003383131.1 [A.queenslandica] | -----                                                          | 226 |

|                                  |                                                                  |     |
|----------------------------------|------------------------------------------------------------------|-----|
| Q9NTX7 [H.sapiens]               |                                                                  |     |
| NP_001128751.1 [P.abelii]        | --SS-----GR-----VPA-PD--TSIEETESDASSDSE--D-VSA                   | 301 |
| BAE31549.1 [M.musculus]          | --SS-----GR-----VPA-PD--TSIEETESDASSDSE--D-VSA                   | 300 |
| XP_015139929.3 [G.gallus]        | --SS-----GR-----VP---D--TSVEETESDASSDSE--D-APV                   | 301 |
| XP_018118669.1 [X.laavis]        | --SS-----GR-----VPA-PD--TSVEETESDASSDSE--D-VSA                   | 301 |
| NP_001167373.1 [S.salar]         | --IN-----FR-----MPP-FN--AVLEEPEPSDSND-----HGS                    | 295 |
| XP_032825805.1 [P.marinus]       | --PS-----MS-----SS-FN--TYAD--GSGDWSDDDEG--D-GEA                  | 307 |
| XP_019623976.1 [B.belcheri]      | SISRQLAGMRLGRSGQISLAGEGGGSSRAVYAA-PH--LAEDDGSRLLGRRRTNMPPFP      | 416 |
| AAL48063.1 [D.melanogaster]      | --MVRMLQKSRLLGRGSDSSRSGLQAVLQQVSSVANVAMAREEIPGDSSDSED-----       | 354 |
| XP_012555516.1 [H.vulgaris]      | -----IQQVALK-----D-----                                          | 376 |
| XP_048581887.1 [N.vectensis]     | FACFMLMQPLTAHSESYHNSPVLG-----DVNA-----P-----S-----               | 239 |
| XP_003383131.1 [A.queenslandica] | -----                                                            | 322 |
|                                  | -----                                                            | 226 |
| Q9NTX7 [H.sapiens]               |                                                                  |     |
| NP_001128751.1 [P.abelii]        | VV-AQHSLTQQRLLVSN-----ANQTVFDRSDRSGTDRSV-A-----                  | 336 |
| BAE31549.1 [M.musculus]          | VV-AQHSLTQQRLLVSN-----ANQTVFDRSDRSGTDRSV-A-----                  | 335 |
| XP_015139929.3 [G.gallus]        | VV-AQHSLTQQRPLVFN-----GNQTVADQSDRSGTDRSV-A-----                  | 336 |
| XP_018118669.1 [X.laavis]        | PL-QQHPSSAQQR-----HLNANANQSGADRPV-A-----                         | 329 |
| NP_001167373.1 [S.salar]         | PA-LQHHSFLGNP-----                                               | 307 |
| XP_032825805.1 [P.marinus]       | VEPREQRLRLGES-----LVDRSPPG-----                                  | 328 |
| XP_019623976.1 [B.belcheri]      | PPPHRQPALLPDSLAARQDSGTGRPLRASERLTAHQHGAHGAESSGGGGTGGAVIDT        | 476 |
| AAL48063.1 [D.melanogaster]      | -----                                                            | 354 |
| XP_012555516.1 [H.vulgaris]      | -----                                                            | 376 |
| XP_048581887.1 [N.vectensis]     | -----                                                            | 239 |
| XP_003383131.1 [A.queenslandica] | -----                                                            | 322 |
|                                  | -----                                                            | 226 |
| Q9NTX7 [H.sapiens]               |                                                                  |     |
| NP_001128751.1 [P.abelii]        | -----GGGTVSVSVRSRRPDGQCTVTEV-----                                | 359 |
| BAE31549.1 [M.musculus]          | -----GGGTVSVSVRSRRPDGQCTVTEV-----                                | 358 |
| XP_015139929.3 [G.gallus]        | -----GGRTMSVNVRSRRPDGQCTVTEV-----                                | 359 |
| XP_018118669.1 [X.laavis]        | -----GGGVANASVRSRRPDGQCTVTEV-----                                | 352 |
| NP_001167373.1 [S.salar]         | -----AEASSSSSVRSRRPDGQCTEV-----                                  | 307 |
| XP_032825805.1 [P.marinus]       | AEAQQQSAAPRSATLHVRSRDGRPDGQCTVTDVVNSAIIILLYMWVLGEPLGTQRGARAA     | 349 |
| XP_019623976.1 [B.belcheri]      | -----                                                            | 536 |
| AAL48063.1 [D.melanogaster]      | -----                                                            | 354 |
| XP_012555516.1 [H.vulgaris]      | -----                                                            | 376 |
| XP_048581887.1 [N.vectensis]     | -----                                                            | 239 |
| XP_003383131.1 [A.queenslandica] | -----                                                            | 322 |
|                                  | -----                                                            | 226 |
| Q9NTX7 [H.sapiens]               |                                                                  |     |
| NP_001128751.1 [P.abelii]        | -----                                                            | 359 |
| BAE31549.1 [M.musculus]          | -----                                                            | 358 |
| XP_015139929.3 [G.gallus]        | -----                                                            | 359 |
| XP_018118669.1 [X.laavis]        | -----                                                            | 352 |
| NP_001167373.1 [S.salar]         | -----                                                            | 307 |
| XP_032825805.1 [P.marinus]       | SSYRRVRGGGLCTYTFVIFPDLACASLAQSMRDADPDEEDSDRIHNKDRTRSPDRKGDLE     | 349 |
| XP_019623976.1 [B.belcheri]      | -----                                                            | 596 |
| AAL48063.1 [D.melanogaster]      | -----                                                            | 354 |
| XP_012555516.1 [H.vulgaris]      | -----                                                            | 376 |
| XP_048581887.1 [N.vectensis]     | -----                                                            | 239 |
| XP_003383131.1 [A.queenslandica] | -----                                                            | 322 |
|                                  | -----                                                            | 226 |
| Q9NTX7 [H.sapiens]               |                                                                  |     |
| NP_001128751.1 [P.abelii]        | -----                                                            | 359 |
| BAE31549.1 [M.musculus]          | -----                                                            | 358 |
| XP_015139929.3 [G.gallus]        | -----                                                            | 359 |
| XP_018118669.1 [X.laavis]        | -----                                                            | 352 |
| NP_001167373.1 [S.salar]         | -----                                                            | 307 |
| XP_032825805.1 [P.marinus]       | AASPVDGVDVSKDLDETSERIQQLESALGNATLRLHKLESADVREAGGARGHSGITRSLQK    | 349 |
| XP_019623976.1 [B.belcheri]      | -----                                                            | 656 |
| AAL48063.1 [D.melanogaster]      | -----                                                            | 354 |
| XP_012555516.1 [H.vulgaris]      | -----                                                            | 376 |
| XP_048581887.1 [N.vectensis]     | -----                                                            | 239 |
| XP_003383131.1 [A.queenslandica] | -----                                                            | 322 |
|                                  | -----                                                            | 226 |
| Q9NTX7 [H.sapiens]               |                                                                  |     |
| NP_001128751.1 [P.abelii]        | -----                                                            | 359 |
| BAE31549.1 [M.musculus]          | -----                                                            | 358 |
| XP_015139929.3 [G.gallus]        | -----                                                            | 359 |
| XP_018118669.1 [X.laavis]        | -----                                                            | 352 |
| NP_001167373.1 [S.salar]         | -----                                                            | 307 |
| XP_032825805.1 [P.marinus]       | KVLEQARNIQTQLQHSNRHLERKVTELESREPREVTRRKILNRQPYTSTTTNDDDDGDDDDDED | 349 |
| XP_019623976.1 [B.belcheri]      | -----                                                            | 716 |
| AAL48063.1 [D.melanogaster]      | -----                                                            | 354 |
| XP_012555516.1 [H.vulgaris]      | -----                                                            | 376 |
| XP_048581887.1 [N.vectensis]     | -----                                                            | 239 |
| XP_003383131.1 [A.queenslandica] | -----                                                            | 322 |
|                                  | -----                                                            | 226 |
| Q9NTX7 [H.sapiens]               |                                                                  |     |
| NP_001128751.1 [P.abelii]        | -----                                                            | 359 |
| BAE31549.1 [M.musculus]          | -----                                                            | 358 |
| XP_015139929.3 [G.gallus]        | -----                                                            | 359 |
| XP_018118669.1 [X.laavis]        | -----                                                            | 352 |
| NP_001167373.1 [S.salar]         | -----                                                            | 307 |
| XP_032825805.1 [P.marinus]       | DEDDNDDDDDEEDDAHDDDDDKNNEVSRHQSSDEAQPKNRLHGGKSGHNTTAVQGRAR       | 349 |
| XP_019623976.1 [B.belcheri]      | -----                                                            | 776 |
| AAL48063.1 [D.melanogaster]      | -----                                                            | 354 |
| XP_012555516.1 [H.vulgaris]      | -----                                                            | 376 |
| XP_048581887.1 [N.vectensis]     | -----                                                            | 239 |
| XP_003383131.1 [A.queenslandica] | -----                                                            | 322 |
|                                  | -----                                                            | 226 |
| Q9NTX7 [H.sapiens]               |                                                                  |     |
| NP_001128751.1 [P.abelii]        | -----                                                            | 359 |
| BAE31549.1 [M.musculus]          | -----                                                            | 358 |
| XP_015139929.3 [G.gallus]        | -----                                                            | 359 |
| XP_018118669.1 [X.laavis]        | -----                                                            | 352 |
| NP_001167373.1 [S.salar]         | -----                                                            | 307 |
| XP_032825805.1 [P.marinus]       | GAQVITRELRGATASAEETGRDTTAAGVPAGPGGPYQDCAEYRSQGTSGIYVLHVFNTSH     | 349 |
| XP_019623976.1 [B.belcheri]      | -----                                                            | 836 |
| AAL48063.1 [D.melanogaster]      | -----                                                            | 354 |
| XP_012555516.1 [H.vulgaris]      | -----                                                            | 376 |
| XP_048581887.1 [N.vectensis]     | -----                                                            | 239 |
| XP_003383131.1 [A.queenslandica] | -----                                                            | 322 |
|                                  | -----                                                            | 226 |
| Q9NTX7 [H.sapiens]               |                                                                  |     |
|                                  | -----                                                            | 359 |

|                                 |                                                              |      |
|---------------------------------|--------------------------------------------------------------|------|
| NP_001128751.1[P.abelii]        | -----                                                        | 358  |
| BAE31549.1[M.musculus]          | -----                                                        | 359  |
| XP_015139929.3[G.gallus]        | -----                                                        | 352  |
| XP_018118669.1[X.laavis]        | -----                                                        | 307  |
| NP_001167373.1[S.salar]         | -----                                                        | 349  |
| XP_032825805.1[P.marinus]       | TLKVYCDMQTGGGWTVPQRREDGHINFNRPWQDYKLGFGSADREYWLGNAAVHVLTSRR  | 896  |
| XP_019623976.1[B.belcheri]      | -----                                                        | 354  |
| AAL48063.1[D.melanogaster]      | -----                                                        | 376  |
| XP_012555516.1[H.vulgaris]      | -----                                                        | 239  |
| XP_048581887.1[N.vectensis]     | -----                                                        | 322  |
| XP_003383131.1[A.queenslandica] | -----                                                        | 226  |
|                                 |                                                              |      |
| Q9NTX7[H.sapiens]               | -----                                                        | 359  |
| NP_001128751.1[P.abelii]        | -----                                                        | 358  |
| BAE31549.1[M.musculus]          | -----                                                        | 359  |
| XP_015139929.3[G.gallus]        | -----                                                        | 352  |
| XP_018118669.1[X.laavis]        | -----                                                        | 307  |
| NP_001167373.1[S.salar]         | -----                                                        | 349  |
| XP_032825805.1[P.marinus]       | PQALRILLWDWDENQAYASYARFTLRGEAARYRLLVSGFSGTAGRYSSLAQSGAEFSTRD | 956  |
| XP_019623976.1[B.belcheri]      | -----                                                        | 354  |
| AAL48063.1[D.melanogaster]      | -----                                                        | 376  |
| XP_012555516.1[H.vulgaris]      | -----                                                        | 239  |
| XP_048581887.1[N.vectensis]     | -----                                                        | 322  |
| XP_003383131.1[A.queenslandica] | -----                                                        | 226  |
|                                 |                                                              |      |
| Q9NTX7[H.sapiens]               | -----                                                        | 359  |
| NP_001128751.1[P.abelii]        | -----                                                        | 358  |
| BAE31549.1[M.musculus]          | -----                                                        | 359  |
| XP_015139929.3[G.gallus]        | -----                                                        | 352  |
| XP_018118669.1[X.laavis]        | -----                                                        | 307  |
| NP_001167373.1[S.salar]         | -----                                                        | 349  |
| XP_032825805.1[P.marinus]       | QDHDRCQCKCAQLSSGGWWEACGSPNLNGQFFPKGSHYGHFNGIKWHYWRGASYSLKAS  | 1016 |
| XP_019623976.1[B.belcheri]      | -----                                                        | 354  |
| AAL48063.1[D.melanogaster]      | -----                                                        | 376  |
| XP_012555516.1[H.vulgaris]      | -----                                                        | 239  |
| XP_048581887.1[N.vectensis]     | -----                                                        | 322  |
| XP_003383131.1[A.queenslandica] | -----                                                        | 226  |
|                                 |                                                              |      |
| Q9NTX7[H.sapiens]               | -----                                                        | 359  |
| NP_001128751.1[P.abelii]        | -----                                                        | 358  |
| BAE31549.1[M.musculus]          | -----                                                        | 359  |
| XP_015139929.3[G.gallus]        | -----                                                        | 352  |
| XP_018118669.1[X.laavis]        | -----                                                        | 307  |
| NP_001167373.1[S.salar]         | -----                                                        | 349  |
| XP_032825805.1[P.marinus]       | TMMIRPADF                                                    | 1025 |
| XP_019623976.1[B.belcheri]      | -----                                                        | 354  |
| AAL48063.1[D.melanogaster]      | -----                                                        | 376  |
| XP_012555516.1[H.vulgaris]      | -----                                                        | 239  |
| XP_048581887.1[N.vectensis]     | -----                                                        | 322  |
| XP_003383131.1[A.queenslandica] | -----                                                        | 226  |
