# Supplementary material for: An Evolutionary Perspective on the Origin, Conservation and Binding Partner Acquisition of Tankyrases
Source: MDPI journal article supplement (doi:10.3390/biom12111688), 2022-11-15
Supplement: s1 [file s1]

# Golgin-45

## Homo sapiens:

>sp|Q9H2G9|G045 HUMAN Golgin-45 OS=Homo sapiens OX=9606 GN=BLZF1 PE=1 SV=2  
MTTKNLETKVTVTSSPFI**SGAGDGQW**TEEPPKSVEVTSQVSRKHHSLSQSPWKKAVPSES  
GVLQLGKMLTEKAMEVKAVRILVPKAAITHDIPNKNTKVKSLGHHKGEFLGQSEGVIEPN  
KELSEVKNVLEKLNKNSERRLLQDKEGLSNQLRVQTEVNRRELKLLVASVGDDLQYHFERL  
AREKNQLILENEALGRNTAQLSEQLERMSIQCDVWRSKFLASRVMADEL TNSRAALQRQN  
RDAHGAIQDLLSEREQFRQEMIATQKLEELLVSLQWGREQTYSPSVQPHSTAELALTNH  
KLAKAVNSHLLGNVGINNQKKIPSTVEFCSTPAEKMAETVLRILDPVTCKESSPDNPFPE  
SSPTTLATKKNIGRFHPYTRYENITFNCCNHCRGELIAL

## Pongo abelii:

>NP\_001126836.1 golgin-45 [Pongo abelii]  
MTTKNLETKVTVTSSPFI**SGAGDGQW**TEEPPKSVEITSGVQSRKHHSLSQSPWKKAVPSESPGVLQLGKMLT  
EKAMEVKAVRILVPKAAITHDIPNKNTKVKSLGHHKGEFLGQSEGVIEPNKELSEVKNVLEKLNKNSERRL  
LQDKEGLSNQLRVQTEVNRRELKLLVASVGDDLQYHFERLAREKNQLILENEALGRNTAQLSEQLERMSI  
QCDVWRSKFLASRVMADEL TNSRAVLQRQNRDAHGAIQDLLSEREQFRQEMIATQKLEELLVSLQWGRE  
QTYSPSVQPHSTAELALTNHKLAKAVNSHLLGNVGINNQKKIPSTVEFCSTPAEKMAETVLRILDPVTC  
ESSPDDPFFESSPTTLATKKNIGRFHPYTRYENITFNCCNHCQGELIAL

## Mus musculus:

>NP\_001153680.1 golgin-45 isoform b [Mus musculus]  
MEKMTTKLKSSENKILTSTPI**SGAGDGQW**TEEPPKSVEVTHGVQPINQHVLPSPRKKVSSDSPGVLQLGK  
ILNERTVEEAVRIFVPKAAITHDIPTKNTKVKSLGHHREELHNQAEVVDPRKELSEVKVLEKLNKSE  
RRLLDQKEGLSNQLRVQTEINRELKLLVASVGDDPQYHFERLAREKNQLILENEALGRNTAQLSEQLER  
MSIQCDVWRSKFLASRVMADEL TNFRVVLQRQNRDAQSAIQDLLSEREQFRQEMTSQKFLLEELLVSLQW  
GREQTYSPNTPHQSTADLALTNHGLAQAIHAHLLGNVGISHQKKIPTTVEFCSTPAEKMAEKVLRILDPV  
ACTESSPDNQFAESSPTTLTTLTKNIGRFHPYTRYENITFNCCNHCQGELIAL

## Gallus gallus:

>XP\_004938283.1 golgin-45 [Gallus gallus]  
MTSLKEVDYASSPI**SGAGDGQW**TEQMGESLEVSAASATNHQVRHSPQKKAVSSLSPGVLQLGQIHADKS  
VEVEAVRILVPKAAITHVVAATKNAKVAKSAGHKDAFHQSDGTADPKKEQTELKNAIEKLNSEKRLIQD  
KEGLSNQLRIQTEVNRRELKLLVASVGDDLQYHFERMAREKNQLILENEVLGRNLSQLEQLERMSIQCD  
VWRSKFLASRVMADEL TNTRAILQRQTRDAQTAIQDLLNERDQFRQEMIHTQKLEELMVLQWGRQQT  
YPSAQPYTTTELASVNCKLAKAVSSHLLGNVGTSSPKKTSVAVEFCNTPAEKMAERVLRVLDPAARTETS  
TEASFSETSPSSFLSTKKNIGRFHPYTRYEDITFNCCDHCQGELIAL

## Xenopus laevis:

>NP\_001088348.2 Golgin-45 [Xenopus laevis]  
MAATMETLKTLATSTPI**SGAGDGQW**TEAPLKSEVNSPHTKATQSPRKKSTVSPSLSPGVLQLGKMQSDKA  
VEIEAIRILIPKAAITHATTATKNSKHLESNHGSSTELAESVTDVPWKQLSPELKSITLEKLNKNSERRLLQDKE  
GLANQLKVQTEVNRRELKLLVASVGDDLQYHFERMAREKNQLILENEVLNQNTAQLSEQLERMSIQCDVW  
RSKFLASRVMADEL TNIRTNLQRQNRDAQSALQDLLSEREQFRHEMSETQKLTLEALLVSLQWGRQKTYAP  
IPQPHTTTELIAANLKLAKSIQSHLIGNTGSDHQKPAAKPIEYCSTPAENMAETVLKALDPVSCDNDSSD  
ISLSDDSPFLLAKKNIGRFHPYTRYENITFNCCNQCQRELIAV

## Salmo salar:

>XP\_014008079.1 PREDICTED: golgin-45-like [Salmo salar]  
MSTAVADRGSVHPI**SGAGDGQW**TDEPPVAKEIGVVDTPLFVSPLLKVASPKQSPKTTHTPSPASLQHS  
STPOQSFRASPRDIASAFQLPGVLHLGKVPREACVVVEAVRIVVPRAAISRSQGHMGPAEEKGEAWAGQO  
MEERPSPSLPLEDLRGAMEKLQNSERRLLQDKEGLLNQLHVQTEVNRRELKLLVASVGDDLQYHFERLA  
REKNQMLDNEALGRSLASTAEQLERMSIQCDVWRKFLASRVMAEELTNARVSLQHQTREAQSAITDLL  
SERDEFSRDMMLTHRSLEQLLVLQWGRQQTYYPSAQPLSTGELSLANHKLAEAINSRLLGKGVPGVSSS  
GAGLKKRGQASELFNSTHTPAEKMAEKVLKILDPISCSDNEEKISPLSISDSSPSAFLTNKKSIGRFHPY  
TRYENITFNCCERCSGDILVL

## Petromyzon marinus:

>XP\_032834970.1 golgin-45 [Petromyzon marinus]  
MATTLTRDGTGWPAQVS**SGFADGQW**VTADGAGGDPAKRRPAGSSSSPPLPVRVSQPAPRSSWQHRRPPAKP  
APQHHLHPQPRPLSPAAAAAATPLPHRPQQQQQQQPVVPLAGGQVELTVVQIQVPKEAILHHSARSPLA  
LELGVKPDLSLEAGGSAAAAAAATAALRQEVKELKVEVKRLEESERRLMDDKESVVSQLSRSQTEVNRE  
LKLLVASVGDDLQFHFERAVRERGRQAQAEQELSRSLASASEQLERIGIQCDVWRSKFLASRVMSSEVA  
GARVHALRFLFREQSAVHDLFSERTQLCVDLQDTHRLLLEELVLALQWGRQPTYSLGTRRAHNSLELAEAC  
TTLASLLTQRLGGGSGVSKSPFPAAAGGGGAAGGAAGGGGAAGGGGAAGGGGAAGGGGAAGGAAVAAQPPAQL  
CSTAERMAQQVLRMTEVRMTDFMLVDDAAGGAAGRLLTSKPSGRGFHPYTRYEHITFTCCSRCTGDIVV  
V

## Branchiostoma belcheri:

>XP\_019628762.1 PREDICTED: golgin-45-like [Branchiostoma belcheri]  
MESAFFPAVKPQAHSSQSKKTT**SLHGGGGR**DSTLNAMRRSQLSRTRSETRIFGVQGFQKPKLINDVPLSS  
AKITQFKAEMEERGSSDLQYQFERMAREKAQLSVHDHNLVQQYADLSEEVERLSIQCDVWRSKFLGSRQTQV  
SQLIDLRNAIYQQFGKAAIDNVMKERAPIRKEMVETYRYLLDQLVKALRWGKQPQLQQAANPRNMKELV  
QANHRLVSAVSAQLLGNIKPMNSANQETVESGIGLTNAEAAATQVLNMNFDLQLLSPESAAPVGRMGRF  
HPQHYYEITVNCCNKCKGEIKVV

## Drosophila melanogaster:

>NP\_649889.1 uncharacterized protein Dmel\_CG9356, isoform A [Drosophila melanogaster]  
MEANEASMPGTDKQSAQ**STGSDGQW**QPENSGAAKTESEIPASADVDNKVKRPQLSRKDSSVVQEAVMGRK  
TSTSGSHSNLPLPLGLHTLYRRPENVTRSLAPVVKGELVQMRPRLVTSADSLPEHKKTAKPKFVPEPY  
PGAVNPMSIPTNKKHIRDKNNLDIAVLVDQVSTLRKTQELTETTTDIKETDTASSHEVNSLKEELAKMR  
DERNYFQAQYKFQTVQNSSELKSLVASVGEDLQTRVNLLTEDKLQLARALLDTANNLTHTHTEQIEFLAQ  
CEVWRSKFLASSVMEELARWKADLTQKQLLNESTRQLLHATHQIREIQLDMLKQLKFLAKIRFLNLP  
ADVLSLSAENLNLQRMVLHTGVCIPEETLKLSSASTSPLCEAEKYAVRALEFISQPLMATDEAIRALFD  
QAQRPHYVQSPASEVTFACDNQQLDKMQ

**Hydra vulgaris:**

>XP\_002164131.1 PREDICTED: golgin-45-like [Hydra vulgaris]  
MEPSILKISRFPALNLNQDEITKEPTFGDQSVASKNVLPKDEFSNIEKIKLFSPPNFQLNQEQAIRP  
HNPDEDLIKYLSSSTRPHIPDQELLESLQSKVKFLQEYNEKLIDEKLKVSHQLATQTQINNELKNLLVASI  
GDDLETRYEKMILNRIQSDLELKRILNLVEEYQEEKQAYIQVDVWRSKFLASRVMNEELTQWKSALYYK  
YRDSHTALQSLLEEHSKIRVLNDATRIGLIKIAELLNSKDALDSEMRLTLVDTAFINHDLVESLIEIIE  
ESSWAEPKNEIKQNIFFKQFKNHLKEIYVLPSELSTAEQLAHEIVNTGTIQTEELVRMRDYLAHNRISH  
FLSTNYHVTYNCCNSCKGRIIHL

**Nematostella vectensis:**

>XP\_001635606.1 golgin-45 [Nematostella vectensis]  
MNSLEPHALKMERIPKPGSDIVDYSKVPSGSDGSHSGAALEPTDTRKPHALKQKQPIHFSFGHVELML  
ESDTEEKEEGTKNTENDTIRKHPKATKSTPVLNQIERTSVDSSTQGNNDTHIFIKEEPKQEIILQSSAS  
TLCDKPTGSSTEELKKLQSKVEELEEQTSLTDEKTKLTIQLGIQTEVNSDLKLLVASMEEELNRMEA  
LAHRNAQLRVEVEHWQTLCD EYAEESDRLAIDCDVWRKFMASRMSDQLTCWKTTLYTRYQALAAALQR  
MLDERDELKHVYLVHTTRLLESLDYVVKSGGSFSDTLMDRHPIQGQSILEMATITSCLAQDVTAQVQGFI  
PSGSLPTHALLLNEEKEPALDSTPAEKMALQLLTSSIELQSDDVPSVDSSVLRRMGQYIGNSYHSRLMT  
NSFRVTYDCCDRCTGPVHV

**Amphimedon queenslandica:**

>XP\_019850840.1 PREDICTED: golgin-45-like [Amphimedon queenslandica]  
MESCRRRKQALKEKYLKKAQDLISKKKYEKYKVTDVSWSDPLITSTPLITRTRSTLPSSLRLSPHRDITE  
LERMIEDQNKAMKELKRLLLLASVGGEMGTEIETLIRDKVTLESKLNHSITELMEMNEEIEGLTIECDVWK  
CKVLASRLLI DELREWGNHYHLSVNTLQTLLDERDQLMNHKAIHQVLVNNISRKLMSTSSSTANSTASGI  
KIATVTVPVLQPIHQGCNVLELAKNTSVAVQMISDKISARHEATPMPSSLSLNTSLTEGEKLAHKLLYPV  
PKETTPTSRGLPHLSFSEKTLMEQRKHQQARTLPWTD DRHDGNNDIANNNSYFCNKCNGRAIMI I

XP\_019850840.1[A. queenslandica] 0  
 NP\_649889.1[D.melanogaster] -----MEANESAMPQPTDKSQAC[SGVAKG]QPENSGAAKTESEIPASADVNDKV 1  
 XP\_002164131.1[H.vulgaris] -----MEPSLTKISRFALNIN--QDEITKE[SGVAKG]PQENSGAAKTESEIPASADVNDKV 1  
 XP\_001635606.1[N.vectensis] -----MNSLEPHALKMERIPKPGSDIVDYSKV[SGVAKG]QPENSGAAKTESEIPASADVNDKV 41  
 XP\_019628762.1[B.belcheri] -----MNSLEPHALKMERIPKPGSDIVDYSKV[SGVAKG]QPENSGAAKTESEIPASADVNDKV 52  
 XP\_032834970.1[P.marinus] -----MNTTLTRDGTGWPQAVS[SGVAKG]VTADGAGGGDPAPKAPGAGSSSS 0  
 XP\_014008079.1[S.salar] -----MSTAADVADRGSVHPV[SGVAKG]TDEPVPKAEI---GVVDFTPL--F 46  
 NP\_001088348.2[X.laewis] -----MAAMETLTKLATSTPLRGT[SGVAKG]TEAPLKSEVN--SF 37  
 XP\_004938283.1[G.gallus] -----MTSLKVDVYASSIP[SGVAKG]TEAPLKSEVN--SAGASAT 41  
 NP\_001153680.1[M.musculus] -----KMTTLKSENGKILSTSP[SGVAKG]TEEPKPSVEV---THGVPQFI 39  
 Q9H2G9[H.sapiens] -----MTTNKLETKVITVTS[SGVAKG]TEEPKPSVEV---TSVGQSR 46  
 NP\_001126836.1[P.abelii] -----MTTNKLETKVITVTS[SGVAKG]TEEPKPSVEI---TSVGQSR 42  
  
 XP\_019850840.1[A. queenslandica] 0  
 NP\_649889.1[D.melanogaster] -----KRPQLSRKSDSVVQEAVMGRKSTTSSGHSS-----NLP.LPLGLHTLYRPFENQ 96  
 XP\_002164131.1[H.vulgaris] -----LQKQ-----KPQIHFSPGHVLEMLSDTEEEKECTKNTENDTIRGHFKK 67  
 XP\_001635606.1[N.vectensis] -----LQKQ-----KPQIHFSPGHVLEMLSDTEEEKECTKNTENDTIRGHFKK 95  
 XP\_019628762.1[B.belcheri] -----PPLPVRS--VQP-----APRS--SWQHRPPA-----KP-APQHHLHPQHPFELS 0  
 XP\_032834970.1[P.marinus] -----SVPLLKVAS--PKQ-----SKPT--T--HPSPA-----SLQHSHPSTFTQSPRA-S 80  
 XP\_014008079.1[S.salar] -----N-----N-----HQTQSPFRK 47  
 NP\_001088348.2[X.laewis] -----K-----K-----HQTQSPFRK 49  
 XP\_004938283.1[G.gallus] -----N-----N-----HQTQSPFRK 47  
 NP\_001153680.1[M.musculus] -----K-----K-----HQTQSPFRK 56  
 Q9H2G9[H.sapiens] -----K-----K-----HQTQSPFRK 52  
 NP\_001126836.1[P.abelii] -----K-----K-----HQTQSPFRK 52  
  
 XP\_019850840.1[A. queenslandica] 0  
 NP\_649889.1[D.melanogaster] -----KRPQLSRKSDSVVQEAVMGRKSTTSSGHSS-----NLP.LPLGLHTLYRPFENQ 96  
 XP\_002164131.1[H.vulgaris] -----LQKQ-----KPQIHFSPGHVLEMLSDTEEEKECTKNTENDTIRGHFKK 67  
 XP\_001635606.1[N.vectensis] -----LQKQ-----KPQIHFSPGHVLEMLSDTEEEKECTKNTENDTIRGHFKK 95  
 XP\_019628762.1[B.belcheri] -----PPLPVRS--VQP-----APRS--SWQHRPPA-----KP-APQHHLHPQHPFELS 0  
 XP\_032834970.1[P.marinus] -----SVPLLKVAS--PKQ-----SKPT--T--HPSPA-----SLQHSHPSTFTQSPRA-S 80  
 XP\_014008079.1[S.salar] -----N-----N-----HQTQSPFRK 47  
 NP\_001088348.2[X.laewis] -----K-----K-----HQTQSPFRK 49  
 XP\_004938283.1[G.gallus] -----N-----N-----HQTQSPFRK 47  
 NP\_001153680.1[M.musculus] -----K-----K-----HQTQSPFRK 56  
 Q9H2G9[H.sapiens] -----K-----K-----HQTQSPFRK 52  
 NP\_001126836.1[P.abelii] -----K-----K-----HQTQSPFRK 52  
  
 XP\_019850840.1[A. queenslandica] 0  
 NP\_649889.1[D.melanogaster] -----KRPQLSRKSDSVVQEAVMGRKSTTSSGHSS-----NLP.LPLGLHTLYRPFENQ 96  
 XP\_002164131.1[H.vulgaris] -----LQKQ-----KPQIHFSPGHVLEMLSDTEEEKECTKNTENDTIRGHFKK 67  
 XP\_001635606.1[N.vectensis] -----LQKQ-----KPQIHFSPGHVLEMLSDTEEEKECTKNTENDTIRGHFKK 95  
 XP\_019628762.1[B.belcheri] -----PPLPVRS--VQP-----APRS--SWQHRPPA-----KP-APQHHLHPQHPFELS 0  
 XP\_032834970.1[P.marinus] -----SVPLLKVAS--PKQ-----SKPT--T--HPSPA-----SLQHSHPSTFTQSPRA-S 80  
 XP\_014008079.1[S.salar] -----N-----N-----HQTQSPFRK 47  
 NP\_001088348.2[X.laewis] -----K-----K-----HQTQSPFRK 49  
 XP\_004938283.1[G.gallus] -----N-----N-----HQTQSPFRK 47  
 NP\_001153680.1[M.musculus] -----K-----K-----HQTQSPFRK 56  
 Q9H2G9[H.sapiens] -----K-----K-----HQTQSPFRK 52  
 NP\_001126836.1[P.abelii] -----K-----K-----HQTQSPFRK 52  
  
 XP\_019850840.1[A. queenslandica] 0  
 NP\_649889.1[D.melanogaster] -----KRPQLSRKSDSVVQEAVMGRKSTTSSGHSS-----NLP.LPLGLHTLYRPFENQ 96  
 XP\_002164131.1[H.vulgaris] -----LQKQ-----KPQIHFSPGHVLEMLSDTEEEKECTKNTENDTIRGHFKK 67  
 XP\_001635606.1[N.vectensis] -----LQKQ-----KPQIHFSPGHVLEMLSDTEEEKECTKNTENDTIRGHFKK 95  
 XP\_019628762.1[B.belcheri] -----PPLPVRS--VQP-----APRS--SWQHRPPA-----KP-APQHHLHPQHPFELS 0  
 XP\_032834970.1[P.marinus] -----SVPLLKVAS--PKQ-----SKPT--T--HPSPA-----SLQHSHPSTFTQSPRA-S 80  
 XP\_014008079.1[S.salar] -----N-----N-----HQTQSPFRK 47  
 NP\_001088348.2[X.laewis] -----K-----K-----HQTQSPFRK 49  
 XP\_004938283.1[G.gallus] -----N-----N-----HQTQSPFRK 47  
 NP\_001153680.1[M.musculus] -----K-----K-----HQTQSPFRK 56  
 Q9H2G9[H.sapiens] -----K-----K-----HQTQSPFRK 52  
 NP\_001126836.1[P.abelii] -----K-----K-----HQTQSPFRK 52  
  
 XP\_019850840.1[A. queenslandica] 0  
 NP\_649889.1[D.melanogaster] -----KRPQLSRKSDSVVQEAVMGRKSTTSSGHSS-----NLP.LPLGLHTLYRPFENQ 96  
 XP\_002164131.1[H.vulgaris] -----LQKQ-----KPQIHFSPGHVLEMLSDTEEEKECTKNTENDTIRGHFKK 67  
 XP\_001635606.1[N.vectensis] -----LQKQ-----KPQIHFSPGHVLEMLSDTEEEKECTKNTENDTIRGHFKK 95  
 XP\_019628762.1[B.belcheri] -----PPLPVRS--VQP-----APRS--SWQHRPPA-----KP-APQHHLHPQHPFELS 0  
 XP\_032834970.1[P.marinus] -----SVPLLKVAS--PKQ-----SKPT--T--HPSPA-----SLQHSHPSTFTQSPRA-S 80  
 XP\_014008079.1[S.salar] -----N-----N-----HQTQSPFRK 47  
 NP\_001088348.2[X.laewis] -----K-----K-----HQTQSPFRK 49  
 XP\_004938283.1[G.gallus] -----N-----N-----HQTQSPFRK 47  
 NP\_001153680.1[M.musculus] -----K-----K-----HQTQSPFRK 56  
 Q9H2G9[H.sapiens] -----K-----K-----HQTQSPFRK 52  
 NP\_001126836.1[P.abelii] -----K-----K-----HQTQSPFRK 52  
  
 XP\_019850840.1[A. queenslandica] 0  
 NP\_649889.1[D.melanogaster] -----KRPQLSRKSDSVVQEAVMGRKSTTSSGHSS-----NLP.LPLGLHTLYRPFENQ 96  
 XP\_002164131.1[H.vulgaris] -----LQKQ-----KPQIHFSPGHVLEMLSDTEEEKECTKNTENDTIRGHFKK 67  
 XP\_001635606.1[N.vectensis] -----LQKQ-----KPQIHFSPGHVLEMLSDTEEEKECTKNTENDTIRGHFKK 95  
 XP\_019628762.1[B.belcheri] -----PPLPVRS--VQP-----APRS--SWQHRPPA-----KP-APQHHLHPQHPFELS 0  
 XP\_032834970.1[P.marinus] -----SVPLLKVAS--PKQ-----SKPT--T--HPSPA-----SLQHSHPSTFTQSPRA-S 80  
 XP\_014008079.1[S.salar] -----N-----N-----HQTQSPFRK 47  
 NP\_001088348.2[X.laewis] -----K-----K-----HQTQSPFRK 49  
 XP\_004938283.1[G.gallus] -----N-----N-----HQTQSPFRK 47  
 NP\_001153680.1[M.musculus] -----K-----K-----HQTQSPFRK 56  
 Q9H2G9[H.sapiens] -----K-----K-----HQTQSPFRK 52  
 NP\_001126836.1[P.abelii] -----K-----K-----HQTQSPFRK 52  
  
 XP\_019850840.1[A. queenslandica] 0  
 NP\_649889.1[D.melanogaster] -----KRPQLSRKSDSVVQEAVMGRKSTTSSGHSS-----NLP.LPLGLHTLYRPFENQ 96  
 XP\_002164131.1[H.vulgaris] -----LQKQ-----KPQIHFSPGHVLEMLSDTEEEKECTKNTENDTIRGHFKK 67  
 XP\_001635606.1[N.vectensis] -----LQKQ-----KPQIHFSPGHVLEMLSDTEEEKECTKNTENDTIRGHFKK 95  
 XP\_019628762.1[B.belcheri] -----PPLPVRS--VQP-----APRS--SWQHRPPA-----KP-APQHHLHPQHPFELS 0  
 XP\_032834970.1[P.marinus] -----SVPLLKVAS--PKQ-----SKPT--T--HPSPA-----SLQHSHPSTFTQSPRA-S 80  
 XP\_014008079.1[S.salar] -----N-----N-----HQTQSPFRK 47  
 NP\_001088348.2[X.laewis] -----K-----K-----HQTQSPFRK 49  
 XP\_004938283.1[G.gallus] -----N-----N-----HQTQSPFRK 47  
 NP\_001153680.1[M.musculus] -----K-----K-----HQTQSPFRK 56  
 Q9H2G9[H.sapiens] -----K-----K-----HQTQSPFRK 52  
 NP
