# Supplementary material for: An Evolutionary Perspective on the Origin, Conservation and Binding Partner Acquisition of Tankyrases
Source: MDPI journal article supplement (doi:10.3390/biom12111688), 2022-11-15
Supplement: s1 [file s1]

# TNKS2

## Sequences :

>NP\_079511.1 poly [ADP-ribose] polymerase tankyrase-2 [Homo sapiens]  
MSGRRCAGGAACASAAAEAVEPAARELFEACRNGDVERVKRLVTPEKVNSRDTAGRKSTPLHFAAGFGR  
KDVVEYLLQNGANVQARDDGGLIPLHNACSFGHAENVNLLLRHGADPNARDNNWYTPLHEAAIKGKIDVC  
IVLLQHGAEP TIRNTDGR TALDLADPSAKAVLTGEYKKDELLESARSNGNEEKMMALLTPLNVNCHASDGR  
KSTPLHLAAGYNRVKIVQLLQLQHGADVHAKDKGDLVPLHNACSYGHYEVTELLVKHGACVNAMD LWQFT  
LHEAASKNRVEVCSLLLSYGADPTLLNCHNKS AIDLAPTQPKERLAYEFKGHSL LQAAREADVTRIKKH  
LSLEMVNFKHPQTHETALHCAAASPYPKRKQICE LLRRKGANINEKTKEFLTPLHVASEKAHNDVVEVV  
KHEAKVNALDNLGQTS LHRAAYCGHLQTCRLLLSYGC DPNI I SLQGFTALQMGNE NVQQLLQEGISLGNS  
EADRQLLEAAKAGDVETVKKLC TVQSVNCRDIEGRQSTPLHFAAGYNRVSVVEYLLQHGADVHAKDKGGL  
VPLHNACSYGHYEAELLVKHGAVVNADLWKFTPLHEAAAKGKYEICKLLLQHGADPTKKNRDGNTPLD  
LVKDGDTDIQDLLRGDAALLDAAKKGCLARVKKLSSPDNVNCRDTQGRHSTPLHLAAGYNNLEVAEYLLQ  
HGADVNAQDKGGLIPLHNAASYGHVDVAALLIKYNACVNATDKWAFTPLHEAAQKGR TQLCALLLAHGAD  
PTLKNQEGQTPLDLVSADDVSALLTAAMPSPSALPSCYKQV LNVGRSPGATADALSSGSPSSLSAASS  
LDNLSSGSFSELSVVSSSGTEGASSLEKKEVPGVDFSITQFVRNLGLEHLM DIFEREQITLDVLVEMGHK  
ELKEIGINAYGHRHKLKIGVERLISGQQGLNPYLTANTSSG GTI LIDLSPDDKEFQSVEEEMQSTVREHR  
DGGHAGGI FNRYN I LKIQKVCNKKLWERYTHRRKEVSEENHNHANERMLFHGSPFFVNAI I HKGFDERHAY  
IGGMFGAGIYFAENSSKSNQVYVYGIGGTGCPVHKDRSCYICHRQLLFCRVTLGKSF LQFSAMKMAHSPF  
GHSVTVGRPSVNGLALAEYVIYRGEQAYPEYLITYQIMRPEGMVDG

>XP\_024109627.1 tankyrase-2 [Pongo abelii]  
MSGRRCAGGAACASAAAEAVEPAARELFEACRNGDVERVKRLVTPEKVNSRDTAGRKSTPLHFAAGFGR  
KDVVEYLLQNGANVQARDDGGLIPLHNACSFGHAENVNLLLRHGADPNARDNNWYTPLHEAAIKGKIDVC  
IVLLQHGAEP TIRNTDGR TALDLADPSAKAVLTGEYKKDELLESARSNGNEEKMMALLTPLNVNCHASDGR  
KSTPLHLAAGYNRVKIVQLLQLQHGADVHAKDKGDLVPLHNACSYGHYEVTELLVKHGACVNAMD LWQFT  
LHEAASKNRVEVCSLLLSYGADPTLLNCHNKS AIDLAPTQPKERLAYEFKGHSL LQAAREADVTRIKKH  
LSLEMVNFKHPQTHETALHCAAASPYPKRKQICE LLRRKGANINEKTKEFLTPLHVASEKAHNDVVEVV  
KHEAKVNALDNLGQTS LHRAAYCGHLQTCRLLLSYGC DPNI I SLQGFTALQMGNE NVQQLLQEGISLGNS  
EADRQLLEAAKAGDVETVKKLC TVQSVNCRDIEGRQSTPLHFAAGYNRVSVVEYLLQHGADVHAKDKGGL  
VPLHNACSYGHYEAELLVKHGAVVNADLWKFTPLHEAAAKGKYEICKLLLQHGADPTKKNRDGNTPLD  
LVKDGDTDIQDLLRGDAALLDAAKKGCLARVKKLSSPDNVNCRDTQGRHSTPLHLAAGYNNLEVAEYLLQ  
HGADVNAQDKGGLIPLHNAASYGHVDVAALLIKYNACVNATDKWAFTPLHEAAQKGR TQLCALLLAHGAD  
PTLKNQEGQTPLDLVSADDVSALLTAAMPSPSALPSCYKQV LNVGRSPGATADALSSGSPSSLSAASS  
LDNLSSGSFSELSVVSSSGTEGTSLEKKEVPGVDFSITQFVRNLGLEHLM DIFEREQITLDVLVEMGHK  
ELKEIGINAYGHRHKLKIGVERLISGQQGLNPYLTANTSSG GTI LIDLSPDDKEFQSVEEEMQSTVREHR  
DGGHAGGI FNRYN I LKIQKVCNKKLWERYTHRRKEVSEENHNHANERMLFHGSPFFVNAI I HKGFDERHAY  
IGGMFGAGIYFAENSSKSNQVYVYGIGGTGCPVHKDRSCYICHRQLLFCRVTLGKSF LQFSAMKMAHSPF  
GHSVTVGRPSVNGLALAEYVIYRGEQAYPEYLITYQIMRPEGMVDG

>NP\_001157107.1 poly [ADP-ribose] polymerase tankyrase-2 [Mus musculus]  
MSGRRCAGGAACASAGAEAVEPSARELFEACRNGDVERVKRLVTPEKVNSRDTAGRKSTPLHFAAGFGR  
KDVVEYLLQNGANVQARDDGGLIPLHNACSFGHAENVNLLLRHGADPNARDNNWYTPLHEAAIKGKIDVC  
IVLLQHGAEP TIRNTDGR TALDLADPSAKAVLTGDYKKDELLESARSNGNEEKMMALLTPLNVNCHASDGR  
KSTPLHLAAGYNRVKIVQLLQLLHGADVHAKDKGDLVPLHNACSYGHYEVTELLVKHGACVNAMD LWQFT  
LHEAASKNRIVEVCSLLLSYGADPTLLNCHNKS AIDLAPTQPKERLSYEFKGHSL LQAAREADVTRIKKH  
LSLEMVNFKHPQTHETALHCAAASPYPKRKQICE LLRRKGANTNEKTKEFLTPLHVASENAHNDVVEVV  
KHEAKVNALDNLGQTS LHRAAHCGHLQTCRLLLSYGC DPNI I SLQGFTALQMGNE NVQQLLQEGASLGHS  
EADRQLLEAAKAGDVETVKKLC TVQSVNCRDIEGRQSTPLHFAAGYNRVSVVEYLLQHGADVHAKDKGGL  
VPLHNACSYGHYEAELLVKHGAVVNADLWKFTPLHEAAAKGKYEICKLLLQHGADPTKKNRDGNTPLD  
LVKDGDTDIQDLLRGDAALLDAAKKGCLARVKKLSSPDNVNCRDTQGRHSTPLHLAAGYNNLEVAEYLLQ  
HGADVNAQDKGGLIPLHNAASYGHVDVAALLIKYNACVNATDKWAFTPLHEAAQKGR TQLCALLLAHGAD  
PTLKNQEGQTPLDLVSADDVSALLTAAMPSPSALPSCYKQV LNVGRSPGATADALSSGSPSSLSAASS  
LDNLSSGSFSELSA VSSAAEGATGQRKEDSGIDFSITQFVRNLGLEHLM DIFEREQITLDVLVEMGHK  
ELKEIGINAYGHRHKLKIGVERLISGQQGLNPYLTANNSSG GTI LIDLSPDDKEFQSVEEEMQSTVREHR  
DGGHAGGVFNRYN I LKIQKVCNKKLWERYTHRRKEVSEENHNHANERMLFHGSPFFVNAI I HKGFDERHAY  
IGGMFGAGIYFAENSSKNQVYVYGIGGTGCPVHKDRSCYICHRQLLFCRVTLGKSF LQFSAMKMAHSPF  
GHSVTVGRPSVNGLALAEYVIYRGEQAYPEYLITYQIVRPEGMVDG

>NP\_989672.2 poly [ADP-ribose] polymerase tankyrase-2 [Gallus gallus]  
MAARRCAGGAALAEAPGCSAVEPARELFEACRNGDVERVKRLVNPENVNSRDTAGRKSSPLHFAAGFG  
KDVVEYLLQSGANVHARDDGGLIPLHNACSFGHAENVNLLLRHGADPNARDNNWYTPLHEAAIKGKTVD  
CIVLLQHGAEP TIRNTDGR TALDLADPSAKAVLTGEYKKDELLESARSNGNEEKMSLLTPLNVNCHASDG  
RKSTPLHLAAGYNRVKIVQLLQLQHGADVHAKDKGDLVPLHNACSYGHYEVTELLVKHGACVNAMD LWQFT  
PLHEAASKNRVEVCSLLLSYGADPTLLNCHNKS TIDLAPTQPKERLAYEFKGHSL LQAARESDVARIKK  
HLSLETNVNFKHPQTHETALHCAAASPYPKRKQVCELLRRKGANINEKTKDFLPLHVASEKAHNDVVEVV  
VKHEAKVNALDNLGQTS LHRAAHCGHLQTCRLLLSGCDPSIVSLQGFTALQMGNE SVQQLLQEGIP LIGN  
SDADQLLEAAKAGDVTVKKLC TVQSVNCRDIEGRQSTPLHFAAGYNRVSVVEYLLQHGADVHAKDKGG  
LVPLHNACSYGHYEAELLVKHGAVVNADLWKFTPLHEAAAKGKYEICKLLLQHGADPTKKNRDGNTPLD  
LVKDGDTDIQDLLRGDAALLDAAKKGCLARVKKLSPDNVNCRD TQGRHSTPLHLAAGYNNLEVAEYLLQ  
HGADVNAQDKGGLIPLHNAASYGHVDVAALLIKYNACVNATDKWAFTPLHEAAQKGR TQLCALLLAHGA  
DPTLKNQEGQTPLDLVTADDVSALLTAAMPSPSALPSCYKQVIVSVQTSSTADPLSSVSPSSLSAAS  
SLDNLSSGSFSELP SVVTGNSAEAGATVLEKKEVSGVDFSINQFVRNLGLEHLIDIFEREQITLDVLVEMGH  
KELKEIGINAYGHRHKLKIGVERLISGQQGLNPYLTANTSSG GTI LIDLSPDDKEFQSVEEEMQSTVREHR  
DGGHAGGVFNRYN I LKIQKVCNKKLWERYTHRRKEVSEENHNHANERMLFHGSPFFVNAI I HKGFDERHAY  
IGGMFGAGIYFAENSSKNQVYVYGIGGTGCPVHKDRSCYICHRQLLFCRVTLGKSF LQFSAMKMAHSP  
PGHHSVTVGRPSVNGLALAEYVIYRGEQAYPEYLITYQIVKPEATTEA

>XP\_018082988.1 poly [ADP-ribose] polymerase tankyrase-2 [Xenopus laevis]  
MSGRRCAGASGAASHGNIGAGGEPAARELFEACRNGDVERVKRLVNSDNVNSRDTAGRKSTPLHFAAGFG  
KDVVEHLLQSGANVHARDDGGLIPLHNACSFGHAENVSLLLRHGADPNARDNNWYTPLHEAAIKGKTIDV  
CIVL FQHGAEP TIRNTDSR TALDLS DPSAKAVLTGEYKKDELLESARSNGNEEKMMALLTPLNVNCHASDG  
RKSTPLHLAAGYNRVKIVQLLQLQHGADVHAKDKGDLVPLHNACSYGHYEVTELLVKHGASVNAMD LWQFT  
SLHEAASKNRVEVCSLLLSYGADPTMLNCHNKS AIDLAPTQPKERLSYEFKGHSL LQAAREADLTRIKK  
HLSLETNVNFKHPQTHDTALHCAAASPYPKRKQVCELLFRKGANVNEKTKDFLPLHTASDKAHNDIVELL  
IKHEAKVNALDNLGQTS LHRAAHCGHLQTCRLLLSGCDPSIVSLQGFTALQMGNE SVQQLLQEGLPFSN  
SDADQLLEAAKAGDLDVVKLC TSQSVNCRDVEGRQSTPLHFAAGYNRAVVEYLLQHGADVHAKDKGG  
LVALHNACSYGHYEVTELLVKHGAVINADLWKFTPLHEAAAKGKYEICKLLLHGADSTKKNRDGNTPLD  
LVKDGDTDIQDLLRGDAALLDAAKKGCVSRVKKLC TPNVNCRD TQGRHSTPLHLAAGYNNLEVAEYLLQ  
HGADVNAQDKGGLIPLHNAASYGHVDVAALLIKYNACVNANDKWAFTPLHEAAQKGR TQLCALLLAHGA  
DPALKNQEGQAPLDLVTADDVRALLTAAMP PAALPTPYKFLNVPQSTTAIAALSSVSPSSLSAAS  
SLDNLSSGSFSETTSVSGAEGASGLDKKQGVDLNINQFLRN LGLEHLIDIFEREQITLDVLVEMGHKE  
FKEIGISAYGHRHKLKIGVERLISGQQGLNPYLTANTSSG GTI LIDLSPDDKEFQSVEEEMQSTVREHR  
DGGHAGGVFTKYN I LKIQKVCNKKLWERYTHRRKEVSEENHNHANERMLFHGSPFFVNAI I HKGFDERHAY  
IGGMFGAGIYFAENSSKNQVYVYGIGGTGCPVHKDRSCYVCHRQLLFCRVTLGKSF LQFSAMKMAHSPG  
HHSVTVGRPSVNGLALAEYVIYRGEQAYPEYLITYQIMKPEAVAE G

>XP\_014034742.2 poly [ADP-ribose] polymerase tankyrase-2 isoform X1 [Salmo salar]  
MASVAFRWGSA NTSKLYIYENTTFLMSTRQCSRV LGGVSPGVDT PRSGEPNREIFEACRNGDVERVR  
RLVRPENVNSRDTAGRKSTPLHFAAGFGR RDVVDYLLQNGANVHARDEGGLVSLHNACSFHSEVVNLLR  
RHGADANSRDNWSYTPLHEAAIKGSEV CIVLQHGAEP TIRNTDGR TALDLAEASTKAVLTGEYKDDL  
LESARSGNEEDKIMALLTPLNVNCHASDGRKSSPLHLAAGYNRVKTVQLLLKHGADVHAKDKGDLVPLHNA  
CSYGHYEVTDILVKQGACVNAMD LWQFTPLHEAASKNRVDVCSLLSVSYGADPTFLNCHNQSAIDLSPTPQ  
LKERLAYEFRGHALLQAAREADL PRLKHL SLETTITFKHPLTHETALHCAATSPYPKRKQVCELLRRKGA  
NVNEKTKDFLPLHLASEKSHNDI TEVLVKHEAKVNALDNLGQ TALHRAAHCGHLQTCRLL LKAGCDPLV  
MSLQGFSPSQMGNE SVQEILHEGT LIGNSVDVQ LLEASKSGDLEIVKKLCTMQNVNCRDVEGRQSTPLH

FAAGYNRVSVVEYLLHGGADVHAKDKGGLVPLHNACSYGHYEAELLVHGAVVNIADLWKFTPLHEAAAA  
KGKYEICKLLLQHGADPTKKNRDGSTPLDLVKDGTMDQDLLRGDAALLDAAKKGCLARVEKLCSPDNVN  
CRDAQGRHSTLLHLAAGYNNLEVAEYLLQHGAEVNSQDKGGLPLHNAASYGHVDVAALLIKYDACVNAT  
DKWAFTPLHEAAQKGRQTLCALLLAHGADPALRNQEGQSPDLVTVDVVRALLTAAMPSPALPGCYKPKQV  
ISMSFSPGVVVVPPSLASASTPLSTLASRNSLDNQATASTCTAFPELALLGPSGAVGTDNKEVPGVDLSI  
QGFLNNLQLEHLLIEFEREQITLDVLVEMGHKELKEIGINAYGHRHKIKGVKERLISGQPSLNPYTLTANT  
ANSGTILIDLVSDDKEFQLVEEELQSTIREHRDGLAGGVFNRYNIVKIQKVNCKKLWERYTHRRKEVSE  
EENHNHNERMLFHGSPFFVNAIHKGFDERHAYIGMGFAGIYFAENSSKSNQIVYIGGGTGCPHLKDRS  
CYVCQRHLLFCRVTLGKSLFQFSAMKMAHSPPGHHSVTGRPSVNGLSLAEVVIYRGEQAYPEYLITYQIL  
KPDASVDG

>XP\_032806710.1 poly [ADP-ribose] polymerase tankyrase-2 [Petromyzon marinus]  
MAARRAHLASPPSSSSSLSPSSGSLDTTTAAAAAAATTTAAAAATTTAAVSATSPSTPTAAA  
AAAVAAAAATGSGPGSGQDSSADGGDAGKELFEACRNGDVRGVKRLVPLNVNARDTTGRKSTPLHFAAG  
FGRKDVVEHLLQNGANVHARDGGGLIPLHNACSFGHAEEVNNLLRQGADPNARDNNWYTPLEHAAIKGKI  
DVCIVLLQHGADPGIRNTDGTALDLAEPATAKAVLTGEYKDELLEAARSNEEKLMAILLPLNVNCHAS  
DGRKSTPLHLAAGYNRVRIVQLLQHGADVHAKDKGGLVPLHNACSYGHYEVTELLVKHGASVNAMDLMQ  
FPLHEAASKNRVEVCSLLSYGADPTLLNCHSKSAIDLAPTSSELKERLVYEFRGHSLQAAREADVTRV  
KKHLGLDINFKHPQTHETALHCAVASPYPKRKQVSELLRRKGANVNEKTKDLLPLHVASDKAHNDVID  
VLLKHGAKINVTDSLQGTSLHRAAHAGHLTTCRLLLSHGCDPNLPSLQGGTAAQLGNEVSQQILHESSLP  
VRNSDVEHQLLEAAKAGDLDTVKQLCTTQTVNCRDMEGRHSTPLHFAAGYNRVSVVEYLLQHGADVHAKD  
KGGLVPLHNACSYGHYEAELLVKRGAVVNVDLWKFTPLHEAATAKGYEICKLLLKHGADPTKKNRDGN  
TPDLIVKEGDDTDQDLLRGDAALLDAAKKGCLARVQKLCSENVNCRDSQGRNSTPLHLAAGYNNLEVAE  
YLLHGGADVNAQDKGGLIPLHNAASYGHVDIAALLIKYSACVNATDKWAFTPLEHAAQKGRQTLCALLLA  
HGADSPMKHQEGQTPLDLATADDVRALLIDAMPPEALPVTHKPPSIPTIAATSAATAALAGTTPALAS  
LAPSPVPSGASAGAGVPLLASPSVPASLSAASSMDSLTGACGVAPSPVAGAIAGAAGDGTLLGAC  
GVSAAGATGPAKDPKRSADFEIPGLDMNINMFKGLGLDHLRDIPEKEQITLDVLADMGHEELKEIGIN  
AYGHRHKLKGVRELLGAQGGLAYPGANFYLSYHTTAQGTLLIDLPPDKVEQSVDEMQSTIREHKDG  
GQAGGVFNRYNVIKIQKVNCKKLWERYTHRRKEVTEENHNHNERMLFHGSPFFINAINKGFDERHAYIG  
MGFAGIYFAENSSKSNQIVYIGGGTGCPVHKDRSCYICQRQMLFCRVTLGKSLFQFSAMKMAHSPPGH  
HSVIGRPSVNGLAFAEVVIYRGEQAYPEYLITYQILKPECTPDLTSAAGQKS

>XP\_019641281.1 PREDICTED: tankyrase-1-like isoform X1 [Branchiostoma belcheri]  
MAGRRAMLSDDRIHCDESSGCRELFEACRNGDVARVKKLITPQNVDNARDTAGRKTPLHFAAGFGRKDVV  
EHLNQNGANVHARDGGGLIPLHNACSFGHAEEVNTLLRNGADPNARDNNWYTPLEHAAIKGKIDVCIVLL  
QNQADPSIRNTDGTALDLAEPASAKTVLTGDYKDELLEAARSGNEDKLMALLPLNVNCHASDGRKSTP  
LHLAAGYNRVRIVQLLQHGADVHAKDKGGLVPLHNACSYGHFEVTELLKHGASVNAMDLMQFTPLHEA  
ASKSRIEVCSSLLSHGADPTLLNCHSKSAIDVASTPELQEKLSYEFKGHCLLDGARQTDMAKVKHLLQLD  
IVNFKPHYTHDTALHCAALSPYPKRRQITELLIRKGANLDKNKEFTPLPHVASDKCYIDVMEVLLKHGA  
KVNALDSLQTALHRGAHCGHVQACRLLLSFGVDPSIVSLQGVTAQMATEAVQQLMHEDPPSGPADECD  
QLLEAAKAGDLEAVKVLNCPHTVNCRDVNRHSTPLHFAAGYNRVAVVEYLLQHGADVHAKDKGGLVPLH  
NACSYGHYEVCELLKHGAVVNVDLWKFTPLHEAATAKGYEICKLLLKHGADPNKNRDGNTPDLIVDR  
GDDTDQDLLRGDAALLDAAKGNLARVQKLATPENINCRDQTQGRNSTPLHLAAGYNNVVAEFLLENGAD  
VNAQDKGGLIPLHNACSYGHVEIAQLLIKYGTCVNATDRWNFTPLHEAAQKGRQTLCALLAHGADPTMK  
NOEQGTPLDLATAEDVRALLVDAMPQPSLPAAITAAVTKAASPISSPTTSPSTFQVLSITASMSDHLVGA  
VGAGQGGDGAIDRSVAGESELDMDTISSFLQGLGLNQLLDINFKQITLDILBEMGHEELKEIGINAYGH  
RHKLIKGVREILGGTGTTLNPLYTPALGSHGTILLDLSDDKEYQSVVEEVQSTIRQHKDQQQAGGIFNR  
YNNVIKIQKVNCKKLWRYVHRKEVSEENHNQSNERMFLFHGSPFFINAINKGFDERHAYIGMGFAGIYF  
AENSSKSNQIVYIGGGTGCPHKDRSCYICQRQMLFCRVTLGKAFQLQFSAMKMAHAPPGHHSVIGRPSV  
GGLNFAEYVIYRGEQAFPEYLITYQIVKPEAPASPDPQK

>NP\_651410.1 tankyrase, isoform A [Drosophila melanogaster]  
MANSRSRAILSVNLDAVMANDPLRELFACKTGEIAKVKKLITPQTVNARDTAGRKTPLHFAAGYGRR  
EVVEFLLNSGASIQACDEGGLHPLHNCCSFGHAEEVRLLLKAGASPNNTDNWNYTPLEHAAASKGVDDVCL  
ALLQHGANTIRNSEQKTPLELADAEATRPVLTEYRKDELLEAARSGAEDRLALLTPLNVNCHASDGRR  
STPLHLAAGYNRIGIVEILLANGADVHAKDKGGLVPLHNACSYGHFDVTKLLIQAGANVNANDLWAFTP  
LEHAAASKRVEVCSSLLSRGADPTLLNCHSKSAIDAAPTELRLERIAFEYKGHCLLDACRCKDVSRAKKVL  
CAEIVNVPHPYTGDTPLHLAVVSPDGKRRQIMELLTRKGLSLENEKNKAFPLTPLHAAELLLHYDAMEVLLK  
QQAKNALDSLGGTPLHRCARDEQAVRLLLSYAADTNIVSLEGLTAAQLASDSVLKLLKNPDPSETHLLE  
AARAGHDLTVRRIVLAMPISVNCRDLDGRHSTPLHFAAGFNRVPVVGQFLLEHGAENVYAADKGGVPLHNA  
CSYGHYEVTELLVHGANVNSVDLWKFTPLHEAATAKGYDICKLLLKHGADPMKNRDGATPADIVKESD  
HDVAELLRGPALLDAAKGNLARVQRLVTPESINCRDAQGRNSTPLHLAAGYNNFECAEYLLLENGADVN  
AQDKGGLIPLHNACSYGHLDIAALLIKHKTVVNATDKWGTPLHEAAQKGRQTLCSSLLAHGADVAMNQ  
EGQTPIELATADDVKCLLDAMATSLSQQALSASTQSLTSSSPADPATAAAPGTSSSSSSAILSPFTTET  
VLLPTGASMILSVVPFLPSSSTRISPAQGAEEANGAEGSSDDLLPDADTTNVSGFPLSSQQLHHLIELF  
EREQITLDILAEMGHDDLKQGVSAYGRHKILKGIAQLRSTTIGINNVLCTLLVDLPDDKEFVAVEE  
EMQATIREHRDNGQAGGYETRYNIRVQVKQNRKLWERYAHRQEBIAEENFLQSNERMFLFHGSPFFINAIV  
QRGFDERHAYIGMGFAGIYFAHSSKSNQIVYIGGGTGCPSHKDRSCYVCPRQLLLCRVALGKSLFYQ  
SAMKMAHAPPGHHSVIGRPSAGGLHFAEYVIYRGEQSYPEYLITYQIVKPDSSSGSTEDTR

>XP\_032220531.1 poly [ADP-ribose] polymerase tankyrase-1-like [Nematostella vectensis]  
MPQAKMASKKLASNPFTLSDPDCEGRELFEACRNGDVKVRKLVNNSNVNVRDTAGRKSPLHFAA  
GFRKEVEVVEYLLQCGADVHAMDGGGLIPLHNACSFGHAEEVRIILSHGADANARDNNWYTPLEHAAVKGK  
VDVCVLLQHGADPNIRNTDGTALDVAEAAKLVLTGDYKDELLEGARSGNEEKLMSLLTPLNVNCHA  
SDGRKSTPLHLAAGYNRVGVVQLLLKHGADVHAKDKGGLVPLHNACSYGHFEVTELLKHGASVNAMDLMW  
QFTPLHEAASKARVEVCALLHGGADPTLLNCHSKSAIDAAPTELQEKLLSEFGKHQILEAAKGDCTAK  
IKKLTITETINFQHPLTDLTDLHVAVASSSPKKKGVIETLLKKGADPNQKNSSYAPLHVAAEKLFEAM  
EELLKHAKKNAIDSAQGTALHVAAIAGQVQACRVLMNSGADPTCQTFGQYTAFEVAPFVQKVLHNEE  
SPSPVSDAEKQLLEAAKTGDETVNKLTAQTVNCRDLGRCSTPLHFAAGYNNRVVVEYLLNAGAHVA  
KMGKGLVPLHNACSYGHVKEIAYNVNVDLWKFTPLHEAATAKGYEICKLLLKHGADPMKNRD  
GYTFLDLVKEGSDVADLLRGDAALLDAAKGNLIRITKLATPENINCRDQTQGRNSTPLHLAAGYNHVA  
AEYLLHGGADVNAQDKGGLIPLHNACSYGHVDIAALLIRYNTDVNATDRWLFTPLHEAAQKGRQTLCALL  
LAHGAESPKNQEGQSPVDLATAEDVKLLGDAMLSTQTTSVSTAPVAKVPAPVTATAGATPATGPISG  
MAPLSQANSSLLANSPAGHDGAFSNRSVEAQGEAVRSISAVHPGLDVGVDVQGLDGLQLNKLKEIFERE  
QISWDVLDVMGHEELKEIGIHAYGHRHKILKAVKEKISGMGLGLGPFSTSVQVQSVIQELSMVDKDFASV  
ADEMQSTIVEHRDNGTAGGVTSYTIILKIERVNTKLWEKYVYRREIADSNHNHANERMLFHGSPFFINA  
IVQKGFQDRHAYIGMGFAGIYFAHSSKSNQIVYIGGGTGCPCHKDRSCYVCPRQLLLCRVALGKSLFYQ  
FSAVKMAHAPPGHHSVIGRPSGGLSFAEYVIYRGEQAYPEYLITYQIVKPDSSSGSTEDTR

>XP\_047128184.1 poly [ADP-ribose] polymerase tankyrase-2-like isoform X1 [Hydra vulgaris]  
MALGRPNRAMPSSRNVSASNFMDDGGVHENDSGRELFEACRTGDVIRVRYLIQNNVDNMRDTAGRKTPL  
HFAAGFGRKDIVVEYLLDAGADVHARDGGGLIPLHNACSFHGEVTELLSLRHADVARNARDNNWYTPLEHAA  
IKGKVEVCIALQHGADPLIRNTDGTARDLAEATAKAVLTGEYKKEELDSARSGCEEKMLSLITSLNV  
NHAGDGRKSTPLHLAAGYNRTRIVEILLKHGADVHAKDKGGLVPLHNACSYGHYEVTELLVKHGASVNA  
MDLMQFTPLHEAASKMREIVCTLLSYGADPTVLNCHSKTAIDVAPVQELKDKLLYEYRGHTYLEAVKSS  
DLSKIKRIAPDVLNPFVHPLTLNSALHVCALSTSARDRVADFLIKKGCNMMFCNKRQKLTPLHLCAGNND  
VVVEILLKAGADCNVNEESQSPHLIAAGSGHAHCYILLMGADPTIRNSGVTFAQVGTESVQKIFQ  
ARLEPMKDVLDNLLEASKTGDFELIQSLCTPQVAKCRDVAGRSTPLHFAAGYNNRMDIVEHLLRGADV  
HAKDKGGLVPLHNACSYGHFEIAELLVHGANVNAADYWKFTPLHEAATAKGFDCIKLLKHGADPKKKN  
HEGYTFLDLVKEGFPDVADLLRGDAALLDAAKGNLAKVMKLVTHQNINCRDPTLGRNSTPLHLAAGYNHV  
EYAEYLLLEFGADVNAQDKGGLIPLHNACSYGHVDIAALLIKYKADVNTARWLFTPLHEAAQKGRQTLCALL  
LLTHGANANMKHQEGQTPIDLATADDVQVLLQDSMVSKEVMQITSNTCISKSPINSPQVLPISNDLSP  
QLEFPQGLTKPSTANQNLLESPNCSDGLQTKRLRQAEGTNPLDIDIGTFLSSLQLEFLHEIFISREQITM  
DVLIEMGPDQKLEIGIVAYGHRHKILKGVKERLAGAGCTIVGEPFLSNINASGPNTILQELSMDEKDYQS  
VAEEMQSTVVEHKDGGVAGGISRSYSSSLKIERVINKKLWDKYYYQRKVADANHNHNERNMLFHGSPFFIN  
AIVQKGFDERHAYIGMGFAGIYFAHSSKSNQIVYIGGGTGCPVHKDRSCYDCKRQIILCRVTLGKFF  
FQNSAMKMAHAPPGHHSVIGRPSGGLSYPEYVYRGEQAYPEYLITYKIERPNTLSSCQSAVD

>XP\_019848937.1 PREDICTED: tankyrase-2-like [Amphimedon queenslandica]  
MDTRDHAQIPGDSRQTSQSIEEGESADKNTGDLARLFEACKNGDITVQNLIQQRQSSANERDLHGRKS  
TPLHFAAGFGRRDIVKFLIEKGAHVDFRDEGGLIPLHNCSFQGHVDVVQLLNSGANPNQADNWKFSPLH  
EAAIKGADVCI VLLQHGADSSLNTDRKAPIDLANGAREVLLGTYRQDELLEAAKVGEQLLMQILTP  
LNVNCHASDGRKSTPLHLAAGYNRTSIVQLLLQGDADVHAKDKGGLVPLHNACSYGHYEAELLKYGAS  
INVTDLQWFTPLQEAASKGRSDVCSLLLAHGANPSIANCHGKTAFNLPAPSEEFRRKLDSEYRGYQLAAA

EDGGIILLKKLLSSQLLKFHQHTLDTLLHKAVLSKSSNRQSVI DALLKRGINLNI GNKENMTPLICA AK  
KGILEVVEQLVQRGANINHQDINGMTSLHWAVQNEHAQICRYLLSSGANPSIVNNQGQTIYQLKTSDTIQ  
LILKNEPPVSQFEIEQQLLEAARNSDLEILKKICTPQNVNCRDTKGRMSTPLHFAAGYNRVTVVEFLEN  
GADVHAKDKGGLVPLHNACSYGHYEAELLVKYKANVNAMDLMKFTPLHEAAAKEKYDICKLLLKNGANV  
HSKNRDNLTPIDLVKDPKSDLADLLRGE PALLDAAKKGEIERVKKLLTEDNVNCRDEYGRNSTPLHLAAG  
YNHLDVVEYLL ENKADVNAKDKGGLVPLHNASSYGHVDVASLLIRYNSVINATDRWNFTPLHEAAQKGRT  
QVCSLLIIHGADVILKNQEGQIPLDLATADDVIALQDAMMKDIPLTIPPAEKEAKSNIVNKG LTAAGAS  
LLASELVLGDGVDDKNCMVTQQRGGPAGVGDSKGFMSYRGGGDAPPWHNVTVKDLILELELGHVEL  
FEREQITDILIEMNODDLSIGITAFGVHRLLKRIR ELVQGNNEEYFVGVTTKPTQTQLIELSSDD  
KEPITDADLMQSTICEHRDDGKAGGVFDSYELKIERIVNTKVWERYKYRKEVAESNNNCANELMLFHG  
SPFPVPIVHNGFDERHAYIGGMFGAGIYFAEHSKSNQVYVYIGGGNGCPEHKNRSCYTC LRKLLLCRVV  
LGKPVQYTA VRIAHAPPGHHSVIGRPSAGGLNYPEVVIYRGEQAYPEYIITFRIKKPSATDSMSSSSSL  
DMSNNT

## Alignment

```
XP_019848937.1[A.queenslandica] -----
NP_651410.1[D.melanogaster] -----
XP_047128184.1[H.vulgaris] -----
XP_032220531.1[N.vectensis] -----
XP_014034742.2[S.salar] MA-----SVARFWGS-----ANT-----NSKLYIYE
XP_018082988.1[X.laevis] -----
NP_989672.2[G.gallus] -----
NP_001157107.1[M.musculus] -----
NP_079511.1[H.sapiens] -----
XP_024109627.1[P.abelii] -----
XP_032806710.1[P.marinus] -----
XP_019641281.1[B.belcheri] MAARRAHLASPPSSSSSLSPSSGSLDTTAAAAAAAATTTAAAAAATTTAAAMTTTAAVSA

```

```
XP_019848937.1[A.queenslandica] -----MDTRDHQAKIPGDSRQTSQSIEEGESADKNTGDLARLFEACKNGDIDTVQNLIQQ
NP_651410.1[D.melanogaster] -----MANSSRSR--ALLSVNLDAVMANDPLRELFEACKTGEIAKVKKLIT-
XP_047128184.1[H.vulgaris] -----MALGRPNRAMPSPR--RNS--VASNFMDDGVHENDSGRELFEACRTGVDVIRVYLIQN
XP_032220531.1[N.vectensis] -----MPCQAKMAS--KKL--ASNPTFLSDPDVCEGGRELFEACRNGDVSKVRKLVTN
XP_014034742.2[S.salar] NTPPLMSTRQCSR-----VLGL--GVVSPGVDTPRSQEPNREIFEACRNGDVERVRKLV-
XP_018082988.1[X.laevis] -----MSGRRACG-----ASGS--AASHG--NIGAGGEPARELFEACRNGDVERVRKLVN-
NP_989672.2[G.gallus] -----MAARRCAG-----GAAA--LAEAF--GCGSAVEPARELFEACRNGDVERVRKLV-
NP_001157107.1[M.musculus] -----MSGRRACG-----GGAA--CAS--A--GAEAVEPARELFEACRNGDVERVRKLV-
NP_079511.1[H.sapiens] -----MSGRRACG-----GGAA--CAS--A--AAEAVEPARELFEACRNGDVERVRKLV-
XP_024109627.1[P.abelii] -----MSGRRACG-----GGAA--CAS--A--AAEAMEPARELFEACRNGDVERVRKLV-
XP_032806710.1[P.marinus] TSSPSTTAAAAAAVAAAAATGS--GPSGQDSADGDGAKELFEACRNGDVRVRKLV-
XP_019641281.1[B.belcheri] -----MAGRR--AMLSSDRICHDESSGCRELFEACRNGDVARVKKLIT-

```

```
XP_019848937.1[A.queenslandica] RQSSANERDLHGRKSTPLHFAAGFGRRDIVKFLIEKGAVHDFRDEGLIPLHNSCSFGHV
NP_651410.1[D.melanogaster] P-QTVNARDTAGRKSTPLHFAAGYGRREVVEFLNLSGASTQACDEGLHPLHNCSSFHGA
XP_047128184.1[H.vulgaris] N-WDVNMRDTAGRKSTPLHFAAGFGRKDIVEYLLDAGADVHARDGGILIPLHNACSFHGV
XP_032220531.1[N.vectensis] N-SNVNVRDTAGRKSSPLHFAAGFGRKEVVEYLLQCGADVHAMDGGILIPLHNACSFHGA
XP_014034742.2[S.salar] P-ENVNSRDTAGRKSTPLHFAAGFGRRDVVEYLLQNGANVHARDEGLVSLHNACSFGHS
XP_018082988.1[X.laevis] S-DNVNSRDTAGRKSTPLHFAAGFGRKDVVEHLLQSGANVHARDGGILIPIHNACSFHGA
NP_989672.2[G.gallus] P-ENVNSRDTAGRKSSPLHFAAGFGRKDVVEYLLQSGANVHARDGGILIPLHNACSFHGA
NP_001157107.1[M.musculus] P-EKVNSRDTAGRKSTPLHFAAGFGRKDVVEYLLQNGANVQARDGGILIPLHNACSFHGA
NP_079511.1[H.sapiens] P-EKVNSRDTAGRKSTPLHFAAGFGRKDVVEYLLQNGANVQARDGGILIPLHNACSFHGA
XP_024109627.1[P.abelii] P-EKVNSRDTAGRKSTPLHFAAGFGRKDVVEYLLQNGANVQARDGGILIPLHNACSFHGA
XP_032806710.1[P.marinus] P-LNVNARDTTGRKSTPLHFAAGFGRKDVVEHLLQNGANVHARDGGILIPLHNACSFHGA
XP_019641281.1[B.belcheri] P-QNVNARDTAGRKSTPLHFAAGFGRKDVVEHLLQNGANVHARDGGILIPLHNACSFHGA

```

```
XP_019848937.1[A.queenslandica] DVVQLLLSNGANPNAQDNWKFSPLEHAAIKGKADVCIVLLQHGADSSLLNTRDKAPIDLA
NP_651410.1[D.melanogaster] EVVRLLLKAGASPTNTDNNWYTPLHEAAISKGKDVDCVIALLQGHANHTIRNSEQKTPLELA
XP_047128184.1[H.vulgaris] EVTLSSLRHADVNARDNNWYTPLHEAAIKGKVEVCIALLQHGADPLIRNTDGTARTDLA
XP_032220531.1[N.vectensis] EVVRILLSHGADANARDNNWYTPLHEAAVKGKDVDCVIVLLQHGADPNIRNTDGTALDVA
XP_014034742.2[S.salar] EVVNLLLRHGADANSRDNNWYTPLHEAAIKGKSEVCIVLLQHGAEPTIRNTDGR TALDLA
XP_018082988.1[X.laevis] EVVSLLLRHGADPNARDNNWYTPLHEAAIKGKIDVCIVLFQHGADPTIRNTDGR TALDLS
NP_989672.2[G.gallus] EVVNLLLRHGADPNARDNNWYTPLHEAAIKGKIDVCIVLLQHGAEPTIRNTDGR TALDLA
NP_001157107.1[M.musculus] EVVNLLLRHGADPNARDNNWYTPLHEAAIKGKIDVCIVLLQHGAEPTIRNTDGR TALDLA
NP_079511.1[H.sapiens] EVVNLLLRHGADPNARDNNWYTPLHEAAIKGKIDVCIVLLQHGAEPTIRNTDGR TALDLA
XP_024109627.1[P.abelii] EVVNLLLRHGADPNARDNNWYTPLHEAAIKGKIDVCIVLLQHGAEPTIRNTDGR TALDLA
XP_032806710.1[P.marinus] EVVNLLLRQGADPNARDNNWYTPLHEAAIKGKIDVCIVLLQHGADPGIRNTDGTALDLA
XP_019641281.1[B.belcheri] EVVTLTLRNGADPNARDNNWYTPLHEAAIKGKIDVCIVLLQNGADPSIRNTDGTALDLA

```

```
XP_019848937.1[A.queenslandica] NGQAREVLLGTGYRQDELLEAAKVGEQLLMQILTPLNVNCHASDGRRSTPLHLAGYNNRT
NP_651410.1[D.melanogaster] DEATRPVLTGEYRKDELLEAARSGAEDRLLALLTPPLNVNCHASDGRRSTPLHLAGYNNRI
XP_047128184.1[H.vulgaris] EATAKAVLTGEYKDELLEDSARSNGEEKMALLTPPLNVNCHADGRKSTPLHLAGYNNRT
XP_032220531.1[N.vectensis] EAAKVLVTGDYKDELLEDSARSNGEEKLMSLLTPPLNVNCHADGRKSTPLHLAGYNNRV
XP_014034742.2[S.salar] EASTKAVLTGEYKDELLEDSARSNGEEDKLMALLTPPLNVNCHASDGRKSSPLHLAGYNNRV
XP_018082988.1[X.laevis] DPSAKAVLTGEYKDELLEDSARSNGEEKMALLTPPLNVNCHASDGRKSTPLHLAGYNNRV
NP_989672.2[G.gallus] DPSAKAVLTGEYKDELLEDSARSNGEEKMALLTPPLNVNCHASDGRKSTPLHLAGYNNRV
NP_001157107.1[M.musculus] DPSAKAVLTGDYKDELLEDSARSNGEEKMALLTPPLNVNCHASDGRKSTPLHLAGYNNRV
NP_079511.1[H.sapiens] DPSAKAVLTGEYKDELLEDSARSNGEEKMALLTPPLNVNCHASDGRKSTPLHLAGYNNRV
XP_024109627.1[P.abelii] DPSAKAVLTGEYKDELLEDSARSNGEEKMALLTPPLNVNCHASDGRKSTPLHLAGYNNRV
XP_032806710.1[P.marinus] EPTAKAVLTGEYKDELLEAARSNGEEKLMALLTPPLNVNCHASDGRKSTPLHLAGYNNRV
XP_019641281.1[B.belcheri] EPSAKTVLTGDYKDELLEAARSNGEEDKLMALLTPPLNVNCHASDGRKSTPLHLAGYNNRV

```

```
XP_019848937.1[A.queenslandica] SIVQLLLKQGDVHAKDKGGLVPLHNACSYGHYVEAELLKYGASINVTDLWQFTPLQEA
NP_651410.1[D.melanogaster] GIVEILLANGADVHAKDKGGLVPLHNACSYGHFVDVTKLLIQAGANVNANDLWQFTPLHEA
XP_047128184.1[H.vulgaris] RIVEILLKHGADVHAKDKGGLVPLHNACSYGHYEVTELLVKHGASVNAMD LQWFTPLHEA
XP_032220531.1[N.vectensis] GVVQLLLKHGADVHAKDKGGLVPLHNACSYGHFEVTELLIKHGASVNAMD LQWFTPLHEA
XP_014034742.2[S.salar] KTVQLLLKHGADVHAKDKGDLVPLHNACSYGHYEVTDILVKQGCACVNAMD LQWFTPLHEA
XP_018082988.1[X.laevis] KIVQLLLKHGADVHAKDKGDLVPLHNACSYGHYEVTELLVKHGASVNAMD LQWFTSLHEA
NP_989672.2[G.gallus] KIVQLLLKHGADVHAKDKGDLVPLHNACSYGHYEVTELLVKHGACVNAMD LQWFTPLHEA
NP_001157107.1[M.musculus] KIVQLLLKHGADVHAKDKGDLVPLHNACSYGHYEVTELLVKHGACVNAMD LQWFTPLHEA
NP_079511.1[H.sapiens] KIVQLLLKHGADVHAKDKGDLVPLHNACSYGHYEVTELLVKHGACVNAMD LQWFTPLHEA
XP_024109627.1[P.abelii] KIVQLLLKHGADVHAKDKGDLVPLHNACSYGHYEVTELLVKHGACVNAMD LQWFTPLHEA
XP_032806710.1[P.marinus] RIVQLLLKHGADVHAKDKGGLVPLHNACSYGHYEVTELLVKHGASVNAMD LQWFTPLHEA
XP_019641281.1[B.belcheri] RIVQLILQHGADVHAKDKGGLVPLHNACSYGHFEVTELLIKHGASVNAMD LQWFTPLHEA

```

```
XP_019848937.1[A.queenslandica] ASKGRSDVCSLLLAHGAFNPSIANCHGKTAFNAPSEEFKKKLDSEYRGYQLLAAEDGGI
NP_651410.1[D.melanogaster] ASKSRVEVCSLLLSRGADPTLLNCHSKSAIDAPATRELRIEAFYKGCILLDACRKCVD
XP_047128184.1[H.vulgaris] ASKMRIEVCITLLLSYGADPTVLNCHSKSAIDVAPVQELKDKLLIYEGHTYILEAVKSSDL
XP_032220531.1[N.vectensis] ASKARVEVCALLLGHGADPTLLNCHSKSAIDAPATKELQEKLLSEFKGHQILEAAKGCDT
XP_014034742.2[S.salar] ASKNRVDCVCSLLSVSYGADPTFLNCHNQSAIDLSPTPQLKERLAYEPRFGHALLQAAREADL
XP_018082988.1[X.laevis] ASKNRVEVCSSLLLSYGADPTMLNCHNKS AIDLAPTPQLKERLSYEFKGHSL LQAAREADL
NP_989672.2[G.gallus] ASKNRVEVCSSLLLSYGADPTLLNCHNKSITIDLAPTPQLKERLAYEPRFGHSL LQAARESDV
NP_001157107.1[M.musculus] ASKNRVEVCSSLLLSYGADPTLLNCHNKS AIDLAPTAQLKERLSYEFKGHSL LQAAREADV
NP_079511.1[H.sapiens] ASKNRVEVCSSLLLSYGADPTLLNCHNKS AIDLAPTPQLKERLAYEPRFGHSL LQAAREADV
XP_024109627.1[P.abelii] ASKNRVEVCSSLLLSYGADPTLLNCHNKS AIDLAPTPQLKERLAYEPRFGHSL LQAAREADV
XP_032806710.1[P.marinus] ASKNRVEVCSSLLLSYGADPTLLNCHSKSAIDLAPTSELKERLAYEPRFGHSL LQAAREADV
XP_019641281.1[B.belcheri] ASKSRVEVCSSLLLSHGADPTLLNCHSKSAIDVASTPELQEKLSYEFKGCILLDGAARQTD

```

```
XP_019848937.1[A.queenslandica] ILLKKLLSSQLLKFOHQHTLDTLLHKAIVLSKSNRQSVIDALLKRGINLIGNKENMTPL
NP_651410.1[D.melanogaster] SPAKKLVCAEIVNVPHPYTGDTPLHLAVVSPDGKRQKQIMELLTRKGSLLNEKNKAF LTP
XP_047128184.1[H.vulgaris] SKIKRIIAPDLNVFHP LTNLSALHVCALSTS AKRDVADFLIKKGCNMFNCQK LTP
XP_032220531.1[N.vectensis] AKIKKLTITTEINFQHPLTDLTPHLVAVASSPPKKRGVITELLKKGADPNLQNKSSYAPL
XP_014034742.2[S.salar] PRLLKHL SLEITITFKHPLTHETALHCAASTPYPKRKQVCELLLRKGANVNEKT KDFLTP
XP_018082988.1[X.laevis] TRIKKHLSLEIVNFKHPQTHETALHCAASPPYPKRKQVCELLFRKGANVNEKT KDFLTP
NP_989672.2[G.gallus] ARIKKHLSLEIVNFKHPQTHETALHCAASPPYPKRKQVCELLLRKGANIN EKT KDFLTP
NP_001157107.1[M.musculus] TRIKKHLSLEMVNFKHPQTHETALHCAASPPYPKRKQICELLLRKGANIN EKT KDFLTP
NP_079511.1[H.sapiens] TRIKKHLSLEMVNFKHPQTHETALHCAASPPYPKRKQICELLLRKGANIN EKT KDFLTP
XP_024109627.1[P.abelii] TRIKKHLSLEMVNFKHPQTHETALHCAASPPYPKRKQICELLLRKGANIN EKT KDFLTP
XP_032806710.1[P.marinus] TRVKKHLGLDINFKHPQTHETALHCAVASPPYPKRKQVSELLLRKGANVNEKT KDLLTP
XP_019641281.1[B.belcheri] AKVKKHLGLDINFKHPQTHETALHCAALSPYPKRKQITELLIRKGANLNDKNKEFLTP

```

[illegible]

NP\_651410.1[D.melanogaster] GASMLSPVPVPLPLSSSTRISPAQG-----AEANGAEGSSSD---DLLPADDTITN 893  
XP\_047128184.1[H.vulgaris] -----K--PSTANQNLL-----LSEPCNSDGLQTKRLRDQAEQTNPLDID 886  
XP\_032220531.1[N.vectensis] -----S--PAGHGDGAFSNRSV-SEA-----QGEAVRSISAVHPGLDVD 890  
XP\_014034742.2[S.salar] TASTCTAFPELPAL-----LGPSSGAV-----GTDNKEVPGVDLS 909  
XP\_018082988.1[X.laervis] ----ASSFSETTSVSS-----GGAEGAS-----GLDK-KDEGVLDLN 876  
NP\_989672.2[G.gallus] ----SGSFSELPVVG-----TNSAEGAT-----VLEKKEVSGVDPS 878  
NP\_001157107.1[M.musculus] ----SGSFSELSAVVS-----SSAAEGAT-----GLQRKEDSGIDFS 877  
NP\_079511.1[H.sapiens] ----SGSFSELSVVVS-----SGTEGAS-----SLEKKEVPGVDPS 877  
XP\_024109627.1[P.abeli] ----SGSFSELSVVVS-----SSGTEGTS-----SLEKKEVPGVDPS 877  
XP\_032806710.1[P.marinus] GACGVAPSPVPAGAIG--AGAAGDGTLLGACGVSAADGATGPADKPDRSADFEYPLGLDMN 1009  
XP\_019641281.1[B.belcheri] GAVGGA-----CQGDGA-----IDRSAGESELDMT 865

XP\_019848937.1[A.queenslandica] VKDILTELELGHVLEFEREQITDILIEMNNGDDLQSIGITAFGVRHRLKRIRELVQGN 954  
NP\_651410.1[D.melanogaster] VSGFLSSQQLHHLIELFEREQITLDILAEMGHDDLKQVGSAYGFRHKILKGIAQLRSTT 953  
XP\_047128184.1[H.vulgaris] IGTFLSSLQLEFLHEIFEREQITMDVLTEMGPDLKEIGIVAYGHRHKILKGVKERLAGA 946  
XP\_032220531.1[N.vectensis] VGQFLDGLQLNNLKEIFEREQISWDVLVMGHEELKEIGIHAYGHRHKILKAVKEKISGM 950  
XP\_014034742.2[S.salar] IQGFLNNLGLLEHLEIFEREQITLDVLVEMGHKEKEIGINAYGHRHKILKGVRLISGP 969  
XP\_018082988.1[X.laervis] INQFLRNLGLEHLIDVFEREQITLDVLVEMGHKEKEIGINAYGHRHKILKGVRLISGQ 936  
NP\_989672.2[G.gallus] INQFVRNLGLEHLIDVFEREQITLDVLVEMGHKEKEIGINAYGHRHKILKGVRLISGQ 938  
NP\_001157107.1[M.musculus] ITQFIRNLGLEHLMIDFEREQITLDVLVEMGHKEKEIGINAYGHRHKILKGVRLISGQ 937  
NP\_079511.1[H.sapiens] ITQFVRNLGLEHLMIDFEREQITLDVLVEMGHKEKEIGINAYGHRHKILKGVRLISGQ 937  
XP\_024109627.1[P.abeli] ITQFLRNLGLEHLMIDFEREQITLDVLVEMGHKEKEIGINAYGHRHKILKGVRLISGQ 937  
XP\_032806710.1[P.marinus] INMFLKGLGLDHLRIDFEKEQITLDVLADMGHEELKEIGINAYGHRHKILKGVRLISGQ 1069  
XP\_019641281.1[B.belcheri] ISSFLQQLGLNQLLDIFNKEQITLDILGEMGHEELKEIGINAYGHRHKILKGVRELGGT 925  
: : \* :\*: :\*: :\* :. :.: :\*: :\* :\*: :\* :.

XP\_019848937.1[A.queenslandica] NEEY-----PVGWTTKPTQGTQLIELSSDDKEFIDTADLMQSTICEHRDDGKAGGVFDS 1009  
NP\_651410.1[D.melanogaster] GIGN-----NVNLCITLVDLLPDDKEFVAVEEEMQATIREHRDNGQAGGVFTR 1001  
XP\_047128184.1[H.vulgaris] GCTIV--GEPFLSNINASGNTILQELSMDEKDYQSVAAEEMQSTVVEHKDGGVAGGIFSR 1004  
XP\_032220531.1[N.vectensis] GLG-----LGPFTST--SQVQGSVIQELSMVDKFAVVADEEMQSTVEHRDSDTAGGVFTS 1003  
XP\_014034742.2[S.salar] Q-----GLNPYLTINTANSSTILIDLVSDDKEFQVLEVEELQSTIREHRDGLAGGVFNR 1023  
XP\_018082988.1[X.laervis] H-----GLNPYLTINTSNSSTILIDLAPDDKEFLSVEEEMQSTVREHRDGGHAGGVFTK 990  
NP\_989672.2[G.gallus] Q-----GLNPYLTINTSSSGTLLIDLSSEKFEQSVSEEMQSTVREHRDGGHAGGVFNR 992  
NP\_001157107.1[M.musculus] Q-----GLNPYLTINTSSSGTLLIDLSPPDDKEFQSVSEEMQSTVREHRDGGHAGGVFNR 991  
NP\_079511.1[H.sapiens] Q-----GLNPYLTINTSSSGTLLIDLSPPDDKEFQSVSEEMQSTVREHRDGGHAGGIFNR 991  
XP\_024109627.1[P.abeli] Q-----GLNPYLTINTSSSGTLLIDLSPPDDKEFQSVSEEMQSTVREHRDGGHAGGIFNR 991  
XP\_032806710.1[P.marinus] QGGLAYPGANPYLSYHTTAQGTLLIDLPPDDKEQSVSEEMQSTIREHKDGGQAGGVFNR 1129  
XP\_019641281.1[B.belcheri] GT-----TLNPYLTALGSGHTLITDLSPPDDKEQSVSEVEEQSTIRQHKKDQAGGIFNR 980  
: : \* :\*: :\*: :\* :. :.: :\*: :\* :\*: :\* :.

XP\_019848937.1[A.queenslandica] YEILKIERIVNTKWERYKYRRKEVAEENNNNCANELMLFHGSPFPVYIVHNGFDERHAYI 1069  
NP\_651410.1[D.melanogaster] YNIRVQKVQNRKLWERYAHRQELAEENFLQSNERMFLFHGSPFFINAVIQRGFDERHAYI 1061  
XP\_047128184.1[H.vulgaris] YSSLKIERIVNKKLWERYQRRQVADANNNHNERMLFHGSPFFINAVIQRGFDERHAYI 1064  
XP\_032220531.1[N.vectensis] YTLIKIERIVNTKWERYKYRRKEVAEENNNNCANELMLFHGSPFFINAVIQRGFDERHAYI 1063  
XP\_014034742.2[S.salar] YNIVIKIQKVNKKLWERYTHRRKEVSEENNNHNSNERMLFHGSPFFINAVIHKGFERHAYI 1083  
XP\_018082988.1[X.laervis] YNILKIQKVNKKLWERYTHRRKEVSEENNNHNSNERMLFHGSPFFINAVIHKGFERHAYI 1050  
NP\_989672.2[G.gallus] YNILKIQKVNKKLWERYTHRRKEVSEENNNHNERMLFHGSPFFINAVIHKGFERHAYI 1052  
NP\_001157107.1[M.musculus] YNILKIQKVNKKLWERYTHRRKEVSEENNNHNERMLFHGSPFFINAVIHKGFERHAYI 1051  
NP\_079511.1[H.sapiens] YNILKIQKVNKKLWERYTHRRKEVSEENNNHNERMLFHGSPFFINAVIHKGFERHAYI 1051  
XP\_024109627.1[P.abeli] YNILKIQKVNKKLWERYTHRRKEVSEENNNHNERMLFHGSPFFINAVIHKGFERHAYI 1051  
XP\_032806710.1[P.marinus] YNVIKIQKVNKKLWERYTHRRKEVSEENNNHNERMLFHGSPFFINAVIHKGFERHAYI 1189  
XP\_019641281.1[B.belcheri] YNVIKIQKVNKKLWERYTHRRKEVSEENNNHNSNERMLFHGSPFFINAVIHKGFERHAYI 1040  
\* :.: :\*: :\*: :\*: :\* :. :.: :\*: :\* :\*: :\* :.

XP\_019848937.1[A.queenslandica] GGMFGAGIYFAEHSSSKSNQYVYVIGGGNGCPEHKNRSCYTCLRKLLRCRVVLGKPFVEQYT 1129  
NP\_651410.1[D.melanogaster] GGMFGAGIYFAEHSSSKSNQYVYVIGGGIGCPSHKDRSCYVCPRQLLLRCRVLGRKSLQYS 1121  
XP\_047128184.1[H.vulgaris] GGMFGAGIYFAEHSSSKSNQYVYVIGGGSGCPCVHKDRSCYDCKRQILLCRVTLGKPFQNS 1124  
XP\_032220531.1[N.vectensis] GGMFGAGIYFAEHSSSKSNQYVYVIGGGSGCPTHKDRSCYSCERQQLLLRCRVLGRKPFYQFS 1123  
XP\_014034742.2[S.salar] GGMFGAGIYFAEHSSSKSNQYVYVIGGGTGCPPLHKDRSCYVCQRHLLFCRVTLGKSLFQFS 1143  
XP\_018082988.1[X.laervis] GGMFGAGIYFAEHSSSKSNQYVYVIGGGTGCPPLHKDRSCYVCHRQLLFCRVTLGKSLFQFS 1110  
NP\_989672.2[G.gallus] GGMFGAGIYFAEHSSSKSNQYVYVIGGGTGCPPLHKDRSCYVCHRQLLFCRVTLGKSLFQFS 1112  
NP\_001157107.1[M.musculus] GGMFGAGIYFAEHSSSKSNQYVYVIGGGTGCPPLHKDRSCYVCHRQLLFCRVTLGKSLFQFS 1111  
NP\_079511.1[H.sapiens] GGMFGAGIYFAEHSSSKSNQYVYVIGGGTGCPVHKDRSCYVCHRQLLFCRVTLGKSLFQFS 1111  
XP\_024109627.1[P.abeli] GGMFGAGIYFAEHSSSKSNQYVYVIGGGTGCPVHKDRSCYVCHRQLLFCRVTLGKSLFQFS 1111  
XP\_032806710.1[P.marinus] GGMFGAGIYFAEHSSSKSNQYVYVIGGGTGCPVHKDRSCYVCHRQLLFCRVTLGKSLFQFS 1249  
XP\_019641281.1[B.belcheri] GGMFGAGIYFAEHSSSKSNQYVYVIGGGTGCPPLHKDRSCYVCHRQLLFCRVTLGKSLFQFS 1100  
\*\*\*\*\*:\*\*\*\*\* :\* :\*: :\* :.: :\*: :\* :. :.

XP\_019848937.1[A.queenslandica] AVRIAHAPFGHHSVIGRPSAGGLNYPEYVYIRGEQAYPEYIITFRIKKPSATDSMSSSSS 1189  
NP\_651410.1[D.melanogaster] AMKMAHAPPGHHSVIGRPSAGGLHFAEYVYIRGEQAYPEYLITYQIVKPDSSSGTEDTR 1181  
XP\_047128184.1[H.vulgaris] AMKMAHAPPGHHSVIGRPSAGGLSYPEYVYIRGEQAYPEYLITYKIERPNTLSSCQSAVD 1184  
XP\_032220531.1[N.vectensis] AVKMAHAPPGHHSVIGRPSAGGLSFAEYVYIRGEQAYPEYLITYKINKPDT----- 1174  
XP\_014034742.2[S.salar] AMKMAHSPPGHHSVIGRPSVNGLSLAEYVYIRGEQAYPEYLITYQILKPDASVDG----- 1198  
XP\_018082988.1[X.laervis] AMKMAHSPPGHHSVIGRPSVNGLSLAEYVYIRGEQAYPEYIITYQIMKPEAVAE----- 1165  
NP\_989672.2[G.gallus] AMKMAHSPPGHHSVIGRPSVNGLSLAEYVYIRGEQAYPEYLITYQIVKPEATTEA----- 1167  
NP\_001157107.1[M.musculus] AMKMAHSPPGHHSVIGRPSVNGLSLAEYVYIRGEQAYPEYLITYQIVRPEGMVDG----- 1166  
NP\_079511.1[H.sapiens] AMKMAHSPPGHHSVIGRPSVNGLSLAEYVYIRGEQAYPEYLITYQIMRPEGMVDG----- 1166  
XP\_024109627.1[P.abeli] AMKMAHSPPGHHSVIGRPSVNGLSLAEYVYIRGEQAYPEYLITYQIMRPEGMVDG----- 1166  
XP\_032806710.1[P.marinus] AMKMAHSPPGHHSVIGRPSVNGLSLAEYVYIRGEQAYPEYLITYQILKECTPDLTSAAG 1309  
XP\_019641281.1[B.belcheri] AMKMAHAPPGHHSVIGRPSVGLNFAEYVYIRGEQAYPEYLITYQIVKPEAPAPSPDQK 1160  
\*.: :\*: :\*: :\* :. :. :. :\*: :\*: :\*: :\* :.

XP\_019848937.1[A.queenslandica] LDMSNNNT 1196  
NP\_651410.1[D.melanogaster] ----- 1181  
XP\_047128184.1[H.vulgaris] ----- 1184  
XP\_032220531.1[N.vectensis] ----- 1174  
XP\_014034742.2[S.salar] ----- 1198  
XP\_018082988.1[X.laervis] ----- 1165  
NP\_989672.2[G.gallus] ----- 1167  
NP\_001157107.1[M.musculus] ----- 1166  
NP\_079511.1[H.sapiens] ----- 1166  
XP\_024109627.1[P.abeli] ----- 1166  
XP\_032806710.1[P.marinus] QKS----- 1312  
XP\_019641281.1[B.belcheri] ----- 1160

## Percent identity matrix:

```
#
#
# Percent Identity Matrix - created by Clustal2.1
#
#
1: XP_019848937.1[A.queenslandica] 100.00 56.09 56.91 60.57 56.97 58.58 59.06 58.93 58.93 59.02 57.73 58.79
2: NP_651410.1[D.melanogaster] 56.09 100.00 60.07 65.63 64.35 66.16 66.55 66.52 66.34 66.34 65.70 68.40
3: XP_047128184.1[H.vulgaris] 56.91 60.07 100.00 67.19 63.13 64.35 65.11 65.26 65.08 65.26 63.82 65.67
4: XP_032220531.1[N.vectensis] 60.57 65.63 67.19 100.00 67.66 69.42 70.76 70.21 70.21 70.12 70.17 71.87
5: XP_014034742.2[S.salar] 56.97 64.35 63.13 67.66 100.00 81.77 84.71 83.23 83.92 83.92 76.38 73.16
6: XP_018082988.1[X.laevis] 58.58 66.16 64.35 69.42 81.77 100.00 88.76 87.29 87.97 87.97 80.43 77.10
7: NP_989672.2[G.gallus] 59.06 66.55 65.11 70.76 84.71 88.76 100.00 92.80 93.65 93.40 82.26 78.00
8: NP_001157107.1[M.musculus] 58.93 66.52 65.26 70.21 83.23 87.29 92.80 100.00 97.26 97.00 81.56 78.43
9: NP_079511.1[H.sapiens] 58.93 66.34 65.08 70.21 83.92 87.97 93.65 97.26 100.00 99.66 81.90 78.16
10: XP_024109627.1[P.abelii] 59.02 66.34 65.26 70.12 83.92 87.97 93.40 97.00 99.66 100.00 81.90 78.25
11: XP_032806710.1[P.marinus] 57.73 65.70 63.82 70.17 76.38 80.43 82.26 81.56 81.90 81.90 100.00 80.00
12: XP_019641281.1[B.belcheri] 58.79 68.40 65.67 71.87 73.16 77.10 78.00 78.43 78.16 78.25 80.00 100.00
```
