# Supplementary material for: An Evolutionary Perspective on the Origin, Conservation and Binding Partner Acquisition of Tankyrases
Source: MDPI journal article supplement (doi:10.3390/biom12111688), 2022-11-15
Supplement: s1 [file s1]

# USP25

## Homo sapiens:

>Q9UHP3 [Homo sapiens]  
MTVEQNVLQSSAAQKHQQTFLNQLREITGINDTQILQQALKDSNGNLELAVAFLTAKNAK  
TPQOEETTTYQTALPGNDRIYISVGSQADTNVIDLTGDDKDDLQRAIALSLAESNRAFRET  
GITDEEQAISRVLEASIAENKACLKRTPTTEVWRDSRNPYDRKRQDKAPVGLKNVGNTCWF  
SAVIQSLFNLLEFRRLVLNYPSPNAQDLPRNQKEHRNLPFMRLERLYFALLVGTTRKRYV  
DPSRAVEILKDAFKSNDSSQQQDVSEFTHKLLDWLEDAFQMAEEETDEEKPKNPMVELFY  
GRFLAVGVLEGGKFENTEMFGQYPLQVNGFKDLHECLEAAMIEGIESLHSENSGKSGQE  
HWFTELPFVLTFFELSRFENQALGRPEKIHNNKLEFPQVLYLDRYMHRNREITRIKREEIK  
RLKDYLVTLQQRLELYLSYSGGPKRFPPLVDVLQYALEFASSKPVCTSPVDDIDASSPPSG  
SIPSTLPSTTEQQGALSSEL PSTSPSSVAAISSRSVIHKPFTQSRIPDLPMPHPAPRHI  
TEEELSVLSECLHRWRTIEINTDRDQESISRIHRTIELMYSDKSMIQVPYRLHAVLVHE  
GQANAGHYWAYIFDHRESRWMKYNDIAVTKSWEELVRDSFGGYRNASAYCLMYINDKAQ  
FLIQEEFNKETGGPLVGIETLPPDLRDFVEEDNQRFKELEEWDAQLAQKALQEKLLASQ  
KLRESETSVTTAAAGDPEYLEQPSRSDFSKHLKEETIQITKASHEHEDKSPETVLQSA  
IKLEYARLVKLAQEDTPPETDYRLHHVVVYFIQNQAPKKIIEKTLLEQFGDRNLSFDERC  
HNIMKVAQAKLEMIKPEEVNLEEYEEWHQDYRKFRETTMYLIIIGLENFQRESYIDSLLFL  
ICAYQNNKELLSKGLYRGHDEELISHYRRECLLKLNQAAELFESGDEGVNNGLIIMNE  
FIVPFLPLLVDMEEEKDILAVEDMNRNWCYSYLGQEMEPHLQEKLTDFLPKLLDCSMEIK  
SFHEPPKLPYSYTHELCERFARIMLSLS

## Pongo abelii:

>XP\_024095245.1 ubiquitin carboxyl-terminal hydrolase 25 isoform X3 [Pongo abelii]  
MTVEQNVLQSSAAQKHQQTFLNQLREITGINDTQILQQALKDSNGNLELAVAFLTAKNAKTPQOEETTTY  
QTALPGNDRIYISVGSQADTNVIDLTGDDKDDLQRAIALSLAESNRAFRETGITDEEQAISRVLEASIAEN  
KACLKRTPTAEVWRDSRNPYDRKRQDKAPVGLKNVGNTCWFSAVIQSLFNLLEFRRLVLNYPSPNAQDL  
RNQKEHRNLPFMRLERLYFALLVGTTRKRYVDPSRAVEILKDAFKSNDSSQQQDVSEFTHKLLDWLEDAFQ  
MAEEETDEEKPKNPMVELFYGRFLAVGVLEGGKFENTEMFGQYPLQVNGFKDLHECLEAAMIEGIESLH  
SENSGKSGQEHWFTELPFVLTFFELSRFENQALGRPEKIHNNKLEFPQVLYLDRYMHRNREITRIKREEIK  
RLKDYLVTLQQRLELYLSYSGGPKRFPPLVDVLQYALEFASSKPVCTSPVDDIDASSPPSGSIPSTLPST  
TEQQGAPSSSEL PSTSPSSVAAISSRSVIHKPFTQSRIPDLPMPHPAPRHI  
TEEELSVLSECLHRWRTIEINTDRDQESISRIHRTIELMYSDKSMIQVPYRLHAVLVHEGQANAGHYWAYIFDHRESRWMKYNDIAVT  
KSWEELVRDSFGGYRNASAYCLMYINDKAQFLIQEEFNKETGGPLVGIETLPPDLRDFVEEDNQRFKE  
LEEWDAQLAQKALQEKLLASQKLRESETSVTTAAAGDPEYLEQPSRSDFSKHLKEETIQITKASHEHED  
KSPETVLQSAIKLEYARLVKLAQEDTPPETDYRLHHVVVYFIQNQAPKKIIEKTLLEQFGDRNLSFDERC  
HNIMKVAQAKLEMIKPEEVNLEEYEEWHQDYRKFRETTMYLIIIGLENFQRESYIDSLLFLICAYQNNKGL  
LSKGLYRGHDEELISHYRRECLLKLNQAAELFESGDEGVNNGLIIMNEFIVPFLPLLVDMEEEKDIL  
AVEDMNRNWCYSYLGQEMEPHLQEKLTDFLPKLLDCSMEIKSFHEPPKLPYSYTHELCERFARIMLSLS

## Mus musculus:

>NP\_038946.2 ubiquitin carboxyl-terminal hydrolase 25 [Mus musculus]  
MTVEQNVLQSSAAQKHQQTFLNQLREITGINDAQILQQALKDSNGNLELAVAFLTAKNAKTPQOEETGY  
QTALPGNDRIYISVGSQADANVIDLTGDDKDDLQRAIALSLAESNRAFRETGITDEEQAISRVLEASIAEN  
KACLKRTPTIEVWRDSRNPYDRKRQDKAPVGLKNVGNTCWFSAVIQSLFNLLEFRRLVLNYPSPNAQDL  
RNQKEHRNLPFMRLERLYFALLVGTTRKRYVDPSRAVEILKDAFKSNDSSQQQDVSEFTHKLLDWLEDAFQ  
MAEEETDEEKPKNPMVELFYGRFLAMGVLEGGKFENTEMFGQYPLQVNGFKDLHECLEAAMIEGIESLH  
SDNSGKSGQEHWFTELPFVLTFFELSRFENQALGRPEKIHNNKLEFPQVLYLDRYMHRNREITRIKREEIK  
RLKDYLVTLQQRLELYLSYSGGPKRFPPLVDVLQYALEFASSKPVCTSPVDDIDASSASGPLSPQSLPST  
TEQQGPCASDLPSSSPASGAALPLRSVIHKPFTQSRIPDLPMPHPAPRHI  
TEEELCVLESCLHRWRTIEINTDRDQESISRIHRTIELMYSDKSMIQVPYRLHAVLVHEGQANAGHYWAYIFDHRESRWMKYNDIAVT  
KSWEELVRDSFGGYRNASAYCLMYIDDKAQFLIQEEFNKETGQALVGMETLPPDLRDFVEEDNQRFKE  
LEEWDTQLAQRSLQEKLLAAPKLREAEASATTAAQGGADYLEQPSRSDLSKHWKEETLRVIAKASHDLED  
KGPETVLQSAIKLEYARLVKLAQEDTPPETDYRLHHVVVYFIQNQAPKKIIEKTLLEQFGDRNLSFDERC  
HNIMKVAQAKLEMIKPEEVNLEEYEEWHQDYRKFRETTMYLIIIGLENFQRESYIDSLLFLICAYQNNKGL  
LSKGLYRGHDEELISHYRRECLLKLNQAAELFESGDEGVNNGLIIMNEFIVPFLPLLVDMEEEKDIL  
AVEDMNRNWCYSYLGQMEANLQEKLTDFLPKLLDCSTEIKGFHEPPKLPYSYSAHELCEERFARIMLSLS

## Gallus gallus:

>XP\_040518387.1 ubiquitin carboxyl-terminal hydrolase 25 isoform X5 [Gallus gallus]  
MTVEQNVLQPGGAQKHQQTFLNQLREITGINDIQVLQQALKDSNGNLELAVAFLTAKNAKVPQOEETYYQ  
QTALPGNDRIYISVGSQADTNVIDLTGDDKDDLQRAIALSLEESNRAFRETGITDEEQAISRVLEASIAEN  
KASLKRTHTPEVMSDSPNPYDRKRQDNCVPGLKNVGNTCWFSAVIQSLFNLLEFRRLVLNFPSPANAQDL  
RNQKEHRNLPFMRLERLYFALLVGSKRKYVDPSRAVEILKDAFKSNDSSQQQDVSEFTHKLLDWLEDAFQ  
IAEEERDGEKPKNPMVELFYGRFLAVGVLEGGKFENTEMFGQYPLQVNGFKDLHECLEAAMIEGIESLH  
SENSAKSGQEHWFTELPFVLTFFELSRFENQALGRPEKIHNNKLEFPPILYLDRYMHNKREITRIKREIK  
RLKEYLVTLQQRLELYLSYSGGPKRFPPLVDVLQYALEFASSKPVCTSPVDDL GASAPSSGTLPAQTSPST  
IEQQGSSSDVPSTSPVQSRISVIHKPFTQSRIPDLPMPHPAPRHI  
TEEELSVLGCLHRWRTIEVNDTRDLQESISRIHRTIELMYFDKTMIQVPYRLHAVLVHEGQANAGHYWAYIYDHHQNRWMKYNDISVTKSTWEE  
ERDSFGGYRNASAYCLMYINDKEQYLIEEEFNKETGGIIVGMDTLPSDLRDYVKEDNKRFEKELEEWDAE  
LAQKAEQEKLLSQIFRAPAFSPAPFQAGEPPEYLEQPSRTDLSKHLKEDSVQAINKALASEQDRGPEAVLQ  
MIAIKLEYARLVKLAQEDTPPETDYRLHHVVVYFIQNQAPKKIIEKTLLEQFGDRNLSFDERC  
HNIMKVAQAKLEMIKPEEVNLEEYEEWHQDYRNFRETTMYLIIIGLENFQRESYIDSLLFLICAYQNNKGL  
LSKGLYRGHDEELISHYRRECLLKLNQAAELFESGDEGVNNGLIIMNEFIVPFLPLLVDMEEEKDIL  
AVEDMNRNWCYSYLGQEMEPNLQEKLTDFLPKLLDCSTEIKGFNDPPKLPYSYTHELCERYARIMLSLS

## Xenopus laevis:

>OCT93923.1 hypothetical protein XELAEV\_18011587mg [Xenopus laevis]  
MTVEQNVLQONSQKHQQTFLNQLREITGINDLQVLQQALKDSNGNLELAVAFLTAKNAKLPQOEETYYQ  
TALPNNDRYISVGSQADTNVIDLTVDKDDLQRAIALSLEESNRTFRETGITDEEQAISRVLEASIAENK  
ACKLRTHTPEVMSDSPNPYDRKRQDNCVPGLKNVGNTCWFSAVIQSLFNLLEFRRLVLNYPSPSAQDVPR  
NQKEHRNLPFMRLERLYFSLMVSSKRKYVDPSRAVEILKDAFKSNDSSQQQDVSEFTHKLLDWLEDAFQIK  
AEERDGEKPKNPMVELFYGRFLAVGVHEGGKFENTEMFGQYPLQVNGFKDLHECLEAAMIEGIESLH  
SENSGKSGQEHWFTELPFVLTFFELSRFENQALGRPEKIHNNKLEFPCLYDRYMHNKREITRLKREIKR  
LKDHLVTVLQQRLELYLSYSGGPKRFPPLADVLQYALEFASSKPVCTSPVEDIDVSAPSSGCVATQTMQSTT  
EHQGSASASETLPTQSRISVIHKPFTQSRIPDLPMPHPAPRNI  
TDEELSVLGCLHRWRTIEVNDTRDLQDSIGRIHRTIELMYSDKQMQVPYKLVHAVLVHEGQANAGHYWAYIFDHHEQRWMKYNDISVTKSWEELER  
DSFGGYRNASAYCLMYINDEEKLMAQEEYDKETGGQVLKGMIDILPLDREYIKEDNKRFEKELEAWDEQL  
RKAEQAEKLLSQIFRAPAFSPAPFQAGEPPEYLEQPSRTDLSKHLKEDSVQAINKALASEQDRGPEAVLQ  
MIAIKLEYARLVKLAQEDTPPETDYRLHHVVVYFIQNQAPKKIIEKTLLEQFGDRNLSFDERC  
HNIMKVAQAKLEMIKPEEVNLEEYEEWHQDYRNFRETTMYLIIIGLENFQRESYIDSLLFLICAYQNNKGL  
LSKGLYRGHDEELISHYRRECLLKLNQAAELFESGDEGVNNGLIIMNEFIVPFLPLLVDMEEEKDILAVEDMNRN  
WCYSYLGQEMEPNLQEKLTDFLPKLLDCSTEIKGLNDPPKLPNFSTHELCEERFARIMLSLS

**Salmo salar:**

>XP\_013993323.1 PREDICTED: ubiquitin carboxyl-terminal hydrolase 25-like isoform X9 [Salmo salar]  
MTVEQNVLQQHSQKHQQTLNQLREVVTGTTDVQLLQQALQVSNGLDAEAVAFLTEKNAKVPQQDEAAYYQ  
TTQVGNDRYISVGSQADTNVIDLTGDDKDDLQRAIALSLEESSRAFRETGITDEEQAISRVLEASIAENK  
ASLKRTHTEVWSDSPNPHDRKRMCNCPVGLKNVGNTCWFSFSAVQSLEFNLLFQRLVLHYSPPARVQDLPR  
NQKEHRNLPFQJELRNLFSLMVGSKRKYVDPSRAVEILKDAFKSSESQQQDVSEFTHKLLDWLEDAFMK  
AEDREGEKFPKNFMVELFGRFQAVGVLEGGKFENTEMFGQPLQVNGFKDLHECLEAMIEGEIESLSHS  
SAENSASKQGEHWFTELPVLTFFELSRTEFQVALGRPEKIHNNKLEFPFMLYMDRYMDNRNIEATIKREI  
RRLKEQILLQQRLERYLSYSGSGPKRFLADVLYAMEPASSKPVCTSPLEDIDTSAPPGGTTGQILLPAL  
STAEQGPSCTLPEGLAAAPTQAPSTQQRVPVHKPFTHSRLPDPDPMHPAPRHITHEELRVLEGCLHRWRS  
EVENOTHDLQGSISRIRHTIELMYSDKSMQVPPRLHAVLVHEGQANAGHYWAYIDPHQQRWMMKYNDIS  
VTKSWEELVRDSFGGYRNASAYCLMYINDKKPFLIEEFDKETGQMLSGLDKLPDLKAVVKEDNGLFD  
KEMEEWDKLQARKAQEKLALAAAAAATAETTTSHQPMSTESPSPDSWGPDQDPEYMEQSPSTDSDKHLQ  
EDTERAISKAAAEQGEERSPEGLLTAAIKVETRLRLRFAQEDTAPENDYRLQHVIYVYIHNQAPKKILER  
TLIMQFADRNLSFDERCKSIMKVARAKLDLVKPEEVNMEEYEMWHQDYRNFRETTFIMIGLELFQKKCF  
VEALMYLITYSYQYNRELLVKGLYRGHNDELIGHYRRECLLKLNENAARMFESGEEPEVCNGLSIMNELVV  
PCPIPLLVDHTEKDLLAVEDMNRNWCYSLGQEMEPNLQEKLTDFLPKLLDCSTEIKSFHDPFKLPTYSTL  
ELVERYGRVMASLCRVADGS

**Petromyzon marinus:**

>XP\_032826770.1 ubiquitin carboxyl-terminal hydrolase 25-like isoform X3 [Petromyzon marinus]  
MADRQMTVMTVEHRETAGIPSRNNQIILNQLREITGNSDVIALQQALQAAQGDVSQAVALLTETPNQNA  
GCALSSSQSHRSLFNQSQNSTGVIDLTGDDKDDLQRAIALSLQETSERAVRADLTTEEQDISRVLEESLA  
EASGPGGVKRRKSDPCACSCPRGEGDASGGGAEEGEVAVSAVRAGAPVGLKNVGNTCWFSAVVQSLFHL  
PQFRRLILGFTLPDSRLQNFQSENERVGLCFKRELRLVLFALMVGSVRGFVPSPAVHILKGAFRGADTQQ  
DYSSEFTHKLLDWLEDAFRISABESRAKLLDVKPEEVNMEEYEMWHQDYRNFRETTFIMIGLELFQKKCF  
HDLHECLEHAHTAGDIEQQQSQPPACASSQQLWFSELPVLTLELSRFNFTEVGRPEKIHRSLEFPDT  
IYMDRYMESNKKEVTRIKRDEIRRLSEQQSHLQQTLARYQSYSGSPQRYPLVDILSCALQFASTPTATVLL  
PPTSVLNHHGPPSSAAKPPCTLSNHHVTTSPVTSSSQVVSNNIALFPPIVESTPIPTSNHHVSSSAASP  
VLTHNHSDLSSTVPPPTMQSTNRVLSPTSLEPIPVPLTNHVAPSCATTSTPTTINSHTAPSPAFLIHIA  
STNHVAPPTVVKSPADRALLVDDTGPVLINGVAELGVALPPSDESSQPKAEALDINGDLSSESTAA  
PGCVVADGEVHQLRQQQPPSAAAAVACSAPEPHHTQERHGARARQEVPAQKSGEQNRTGDPFPFGQRT  
ADSQASVSLQQGSLQGEAMQVDTLQENVQGEEEGSGQKQDITQQQGLAQGESNQQTETQQRFDLQSEAN  
QVSLIQDMQQQHHRGNVQQEHVQGGNPQQGNFQQENSEQCKEQEGSTQQCDVQRVQAVEARQEGGRLEW  
HGPCAPQAVTALELVRVLSRWNSQVQRELQDLQDSICRIKRTIDLMYTDKTRFQLPYRLHAVLVHDG  
QMAAGHYWAYVREHARLPAASASSSSSSSGNSASSNSVSGASDESSGSDSCWRKFNDRVSRASWEL  
VRDSYGGGARSASAYCLVYVNARAHDTSELAGAVGDLSSLSPALRDLVAKDNHRFLSEMAMRNGNGPER  
PAEPDADAREPGQRAEPREHEQEERRHEHGGEQAPARAAPAAAAAASREGEESGAAREQERADKHSQ  
TNSLQGEAEPTREVRVDGRARAGEREETRVHEGRAPDVASISETQRQGEADGSASLPGREGTSAPSPSPS  
GTEEYMKVGPDTTEKPKRVERVVEVSIPIDVGTIVVQAEEHGYNDEVMLTPAMQGVLMAVARARLVREAQ  
PEATLIEAFKVEYARLRTLAQESYPDASSPASPPAPAGASGAAATAWRGREERLEHVVIYLFQNEAPNR  
VVERALLEQFADRNLSYDEQLIKIMVAQAKLQEISPEDMDPAEYQKWHQEYELFRQVCVYLVMGIEKYQ  
EGRYTEALPCTMHAAHNEELLARQKRRGVRRDVLARYRRVVRVNEACALFTGTGDVAQATRLSLAAMT  
ELVLVPMALLAPLQSSCGGDAAGEAAVARESOLCAVELMERDWCYSYLGRDMSSELQELLDFLPRLD  
YQPEPAPPTQLTTPPLQGGPPPPPPPPSETKCESSGGENWRGLRAPRLKAYSPHTLAERKMAEVLVRNRP  
EA

**Branchiostoma belcheri:**

>XP\_019624636.1 PREDICTED: ubiquitin carboxyl-terminal hydrolase 25-like [Branchiostoma belcheri]  
MSEFILDHAYQAGKGDIAEVVSIITNQNSVSLVTNNRNDEVQVQVQVRNAQRPSQAGRPDGRANTQEPAGV  
IDLTADTEDKDQEDLQRAIALSLQEAQTANTANRPGCECRPKRRKSSVSDNVQETPREPGWVGLKNVG  
NTCWFSAVQSLEFHLPVFRDLVLGFRFFPKDPANPSRESLVLHFMQJELRCLFARMQGSNRKYIDPCTCVVK  
SLRELIFFRAGETQQDVSEFTHKLLDLLEEAFTIVQRRQSTQPGSSASANTSSENGDKKSNPMLDLFYGR  
IQAEGMHAGKMFTNQQTVGQYTLQVNGFKDLHESLEGATAGQIEITGHEEGATKSGLEHWFTHLPVLT  
ELSRFEFNQKLGKAEKIHKKLEFPKFLYMDRYLVNKKELTRLKREEMKMKKEEMDTLQAKLDSFNLYSGS  
YKRLPLPLDKYTLTEFAEKSTVQTVDGQVRSNGSGSSKAANGNHNGSEKKTDEEDGSSDDFEVISAV  
HSADSLACLSSKKTLDAVATKKAAPVPTSEEMAIPSKVHPCPHVTKHEELAVLQTLRRWRHEAEKEVKG  
LQDRILLYLQAKIENLYEDNSLKQVPYQLHAVLVHEGQASAGHYWAYVRDHTQNRLKFNVDVTVTGMSWGE  
LLRESEGGYHHASAYCLMYIDITRKDLVEVKLQWSQYDELKMLVLAENERFIAQQRDLESKQRRTMVRE  
EDPPANHRGGQTTSESSSGEVADQPIQGEHRVVDVQRKQFPQVKPFVTTETQQGVRLGRTSQQSTPLD  
HSGHVLQAMKMTLLEVSNGVDGYEGNRFNSNIETFGACPLQVQGYSNLHDSLEGMAARELEPANHGDTQNSG  
QEHWFTELPVLTFFMLSPFLNQSGRAEKIHEKLFQKCTYMDRYMERKELSRAREEVKTLKRRHL  
LKSSLDRYNTYSGSAKRSPIQDILDSALNFVRSTPPSDSTDVEMHTPIPGSPVTFGTTSAGPSTLSDRT  
PSLHAPRVYTESELETIATSLRRWRTEVEQVDLIDSTLSLKEVEEAISVMYNDEEMKTIPIRYLVAVLVHE  
QANGGHYWAYINDPLDRWRKFNIDITVSEVTWEEVERESLGGVRNVSAVCLLYCDARREEVIRAGNTE  
VLSAELQQVMNEDNASFEQLRDWDEKQAKAAKEAKSQALVVARPDLVDAEASCAVSPRAHSPAARASE  
SVLTANGLVPSLVDSGKLTIDEAITQWCNNEKTRLDKLAREYPEYPGDVRLLEHLGIYLMRCSAPDF  
TVECALIESVIDEVKAKDQSLMPYRKRVPQELEREKGTDRAADYKRKWEYMTFKLINSCFLTGLEHFHS  
QKYKSELPYLVHAYELNRLSDPTNNARMSDQRLLAHCRVCFKLKNELAISLFESDDYKTLCEGLDLVS  
EQVVPCTPQLVTSFYAEDREAEHMRNNWFTYLGKTVDEKREQELQDFLPKLLDGSDTGNFEEMRPPFVY  
RPTNSKDLCERFTRAMEIVHANMPPAAKA

**Drosophila melanogaster:**

No homolog found.

**Hydra vulgaris:**

No homolog found.

**Nematostella vectensis:**

>XP\_032229076.1 ubiquitin carboxyl-terminal hydrolase 25 [Nematostella vectensis]  
MTVEYPPSSMKKVTQENEAIHQCEITGVSIIEAQNAFAAGNYNVDEAISILTQSNLKSSTTHHVKKTFPV  
EQEEVILDTKDDKDDDDLEKAIALSLSQESQAGQPGGITAEEQDISRVLEASLIENKPGQKKRRKGDPMWM  
FVDPVNYPIDRKKVEGTPVGVGNVGNTCWFSFSAVQALFHLFVFRKLVLYGYPQPAANEQKDAHQLLFMLELR  
KLFALLVASRKKYVDPDKAIEILKEALQYNGSDSNPGNQQDVSEFTHKLEWLEDTFNTSEKEEEKSQAN  
SSSSNPFVELFFGQSKVDGYEGNRFNSNIETFGACPLQVQGYSNLHDSLEGMAARELEPANHGDTQNSG  
QEHWFTELPVLTFFMLSPFLNQSGRAEKIHEKLFQKCTYMDRYMERKELSRAREEVKTLKRRHL  
LKSSLDRYNTYSGSAKRSPIQDILDSALNFVRSTPPSDSTDVEMHTPIPGSPVTFGTTSAGPSTLSDRT  
PSLHAPRVYTESELETIATSLRRWRTEVEQVDLIDSTLSLKEVEEAISVMYNDEEMKTIPIRYLVAVLVHE  
QANGGHYWAYINDPLDRWRKFNIDITVSEVTWEEVERESLGGVRNVSAVCLLYCDARREEVIRAGNTE  
VLSAELQQVMNEDNASFEQLRDWDEKQAKAAKEAKSQALVVARPDLVDAEASCAVSPRAHSPAARASE  
SVLTANGLVPSLVDSGKLTIDEAITQWCNNEKTRLDKLAREYPEYPGDVRLLEHLGIYLMRCSAPDF  
TVECALIESVIDEVKAKDQSLMPYRKRVPQELEREKGTDRAADYKRKWEYMTFKLINSCFLTGLEHFHS  
QKYKSELPYLVHAYELNRLSDPTNNARMSDQRLLAHCRVCFKLKNELAISLFESDDYKTLCEGLDLVS  
EQVVPCTPQLVTSFYAEDREAEHMRNNWFTYLGKTVDEKREQELQDFLPKLLDGSDTGNFEEMRPPFVY  
RPTNSKDLCERFTRAMEIVHANMPPAAKA

**Amphimedon queenslandica:**

>XP\_019852971.1 PREDICTED: ubiquitin carboxyl-terminal hydrolase 25-like isoform X2 [Amphimedon queenslandica]  
MTSTAEVMSDKAKQDIMQLQEIFGITSTEAENSYQYKNSLSDAIVGLSSLQENGRVSLLEAAIKSPHS  
SESTSGDTSGLVATCANPNPMAAPAGGGGMAADSDQPTGSTNTNPIDLTQESQDDLDQALALSIGQMQH  
QGGGTSLEQJELKALASIAETHTEYGVPSRVDPDLNPHERKKIEGFLGLKNIGNTCWFSFSAVQSLEN  
TPAFRDSLHFNKTSQTEEDLPHCVLFVLELQKLFALLLESHQRYIDPKQAIDLNASFQTLGNHMQ  
QDVSEFKHLLLEWIEDAFNYQDKTKNNPIELFTGECVTEGKINETSFVNRSQGAFPVQIEGHAHLHDS

LEAATVNTEMEQETWFTHLPPVLVLELSRFKYNQLTGQAEKIHDSLSFDKTLYLDRYLHSNASQTRLLRK  
EMGLLRQPMRKIEETLKSSRLEGLVGAEGASPNVQEEGRSPSRSGSKEEVEFVRKWLEQWRSEMDTEISE  
LKSSLSATRESLDAVYSDPSMNRTSYHLHSVLVHQQASRGHYWAYVRKKKTKKKRKATREMGIQASYLDD  
EQTEEEGVDKSSSEKREEGEGHEDMEVTTTGGDTDVETFSPLSSCEPSSGPASVAPPEVKREEGSKED  
EEEEIWLKYNDVSVTTVDWEEVKRESFGRRGGESACNSNGPGTNTSAYCLLYVNSEAAKTWREEVHLLSLG  
LQRYIAYHNLAFERELKAYDLKVQLQQLTSSEGKELIKPAKAVRFEYPKGEEDPGASTNGGHDMMALAS  
DAKRARAGSPSNLEDMQIDLDNLPPVDPALNLQLSMRLSDKLQMFIQDVPGTIIESRLLTDFHYAHACQT  
SEKVRQAILLYEHVIQDLKRENDLNMSLLARKYFVEICKDPQIYQELQDVRLLYSRFCSCCYHFIQSVNEA  
KRN5WCLSLAHLINCPLYN5SISAQAGDKYSLDQQLGRFRCKALLMVSEIGTVAFTSGEVSSIVIGND  
YIVPGLKAFSLHPPFGDD5ILEKVREWCQCILDQSSLTEDDSKXLADLLMKIVEDYSKAPNIKIPQAFPSN  
FDTQRLAAQYTTAYKTLTSEILL

### Alignment

[illegible]

|                                 |                                                                  |      |
|---------------------------------|------------------------------------------------------------------|------|
| XP_032826770.1[P.marinus]       | ASTPPATVLLPPTSLVNHKGPPSSAAKPPCTLTSTNHVTTSPVSSSQVVSTNNIALFPIVE    | 540  |
| XP_032229076.1[N.vectensis]     | VRSTPP-----SDSTDVEMHT-----                                       | 466  |
| XP_013993323.1[S.salar]         | ASSKPV-----CTSPLEDIDT-----                                       | 475  |
| OCT93923.1[X.laevis]            | ASSKPV-----CTSPVEDIDV-----                                       | 473  |
| XP_040518387.1[G.gallus]        | ASSKPV-----CTSPVDDLGA-----                                       | 474  |
| NP_038946.2[M.musculus]         | ASSKPV-----CTSPVDDIDA-----                                       | 474  |
| Q9UHP3[H.sapiens]               | ASSKPV-----CTSPVDDIDA-----                                       | 474  |
| XP_024095245.1[P.abelii]        | ASSKPV-----CTSPVDDIDA-----                                       | 474  |
|                                 |                                                                  |      |
| XP_019852971.1[A.queenslandica] | -----GVL-----                                                    | 445  |
| XP_019624636.1[B.belcheri]      | -----GHNG-----                                                   | 468  |
| XP_032826770.1[P.marinus]       | STPIPSTNHVSSSAASPIVLTTNHSDLSTVPPTPMQSTNKRVLSPSTSLPIPVPLTNH       | 600  |
| XP_032229076.1[N.vectensis]     | -----PIPGSP-----                                                 | 472  |
| XP_013993323.1[S.salar]         | -----SAPPGGTTG-----                                              | 484  |
| OCT93923.1[X.laevis]            | -----SAPPSGCV-----                                               | 482  |
| XP_040518387.1[G.gallus]        | -----SAPSSGTL-----                                               | 483  |
| NP_038946.2[M.musculus]         | -----SSSASGPL-----                                               | 483  |
| Q9UHP3[H.sapiens]               | -----SSPPSGSIP-----                                              | 483  |
| XP_024095245.1[P.abelii]        | -----SSPPSGSIP-----                                              | 483  |
|                                 |                                                                  |      |
| XP_019852971.1[A.queenslandica] | -----GAEG-----                                                   | 449  |
| XP_019624636.1[B.belcheri]      | -----SEKKTDEEDGSSDDFEVI-----SAV-----                             | 490  |
| XP_032826770.1[P.marinus]       | VAPSCATTSTPTTISINHAPSPAVLPPIHIASSTNHVAPPTVVKSPADRALLVDDTGPFVLIN  | 660  |
| XP_032229076.1[N.vectensis]     | -----VTFGTTSAGST-----                                            | 484  |
| XP_013993323.1[S.salar]         | -----QLPALSTAEQCPSTLP-----                                       | 502  |
| OCT93923.1[X.laevis]            | -----TQTMQSTTEHQGSSSAS-----                                      | 499  |
| XP_040518387.1[G.gallus]        | -----AQTSPSTIEQQGPSSSDV-----                                     | 501  |
| NP_038946.2[M.musculus]         | -----SQSLPSTTEQQGPCASDL-----                                     | 501  |
| Q9UHP3[H.sapiens]               | -----SQTLPSTTEQQGALSSEL-----                                     | 501  |
| XP_024095245.1[P.abelii]        | -----SQTLPSTTEQQGAPSSSEL-----                                    | 501  |
|                                 |                                                                  |      |
| XP_019852971.1[A.queenslandica] | -----H-----                                                      | 449  |
| XP_019624636.1[B.belcheri]      | -----H-----S-----                                                | 492  |
| XP_032826770.1[P.marinus]       | GVAELGVALPSSDESSKQPKAEALDINGDLSESESTAAPGCVVADGEVHQLRQQPQPSSA     | 720  |
| XP_032229076.1[N.vectensis]     | -----EGL-----                                                    | 484  |
| XP_013993323.1[S.salar]         | -----EGL-----                                                    | 505  |
| OCT93923.1[X.laevis]            | -----P-S-----                                                    | 499  |
| XP_040518387.1[G.gallus]        | -----P-S-----                                                    | 503  |
| NP_038946.2[M.musculus]         | -----P-S-----                                                    | 503  |
| Q9UHP3[H.sapiens]               | -----P-S-----                                                    | 503  |
| XP_024095245.1[P.abelii]        | -----P-S-----                                                    | 503  |
|                                 |                                                                  |      |
| XP_019852971.1[A.queenslandica] | -----ADSLACLSSKKT-----                                           | 449  |
| XP_019624636.1[B.belcheri]      | AAAVACSAPEPHHTQERHGARQEVPAQQKSGEQNRTGDPPPPTEQRTADSQQASVLQ        | 503  |
| XP_032826770.1[P.marinus]       | -----AAAPTQAP-----STQQRVPIH-----                                 | 780  |
| XP_032229076.1[N.vectensis]     | -----ETQ-----LPTQSRVPIH-----                                     | 484  |
| XP_013993323.1[S.salar]         | -----TSP-----VQSRVPIH-----                                       | 522  |
| OCT93923.1[X.laevis]            | -----SSSPASGA-----ALPLRSVPIH-----                                | 511  |
| XP_040518387.1[G.gallus]        | -----T-SPSSVA-----AISRSVPIH-----                                 | 513  |
| NP_038946.2[M.musculus]         | -----T-SPSSVA-----AISRSVPIH-----                                 | 520  |
| Q9UHP3[H.sapiens]               | -----T-SPSSVA-----AISRSVPIH-----                                 | 519  |
| XP_024095245.1[P.abelii]        | -----T-SPSSVA-----AISRSVPIH-----                                 | 519  |
|                                 |                                                                  |      |
| XP_019852971.1[A.queenslandica] | -----QGSLQEQEAMQVDTLQENVQQGEEEGSQQKIDITQQQQLAQGESNQQTQQRFDLQSEAN | 449  |
| XP_019624636.1[B.belcheri]      | -----K-----                                                      | 503  |
| XP_032826770.1[P.marinus]       | -----K-----                                                      | 840  |
| XP_032229076.1[N.vectensis]     | -----K-----                                                      | 484  |
| XP_013993323.1[S.salar]         | -----K-----                                                      | 523  |
| OCT93923.1[X.laevis]            | -----K-----                                                      | 512  |
| XP_040518387.1[G.gallus]        | -----K-----                                                      | 514  |
| NP_038946.2[M.musculus]         | -----K-----                                                      | 521  |
| Q9UHP3[H.sapiens]               | -----K-----                                                      | 520  |
| XP_024095245.1[P.abelii]        | -----K-----                                                      | 520  |
|                                 |                                                                  |      |
| XP_019852971.1[A.queenslandica] | -----LDA-----VATKKAAPVP-----                                     | 449  |
| XP_019624636.1[B.belcheri]      | QVSLLLQDMQQQHRGNVQGEHVQQGNPQQGNFQQENSEQCKEQQEGSTQQCDVQRVQAVE     | 516  |
| XP_032826770.1[P.marinus]       | -----LSD-----                                                    | 900  |
| XP_032229076.1[N.vectensis]     | -----PFTQ-----                                                   | 487  |
| XP_013993323.1[S.salar]         | -----PFTQ-----                                                   | 527  |
| OCT93923.1[X.laevis]            | -----PFTQ-----                                                   | 516  |
| XP_040518387.1[G.gallus]        | -----PFTQ-----                                                   | 518  |
| NP_038946.2[M.musculus]         | -----PFTQ-----                                                   | 525  |
| Q9UHP3[H.sapiens]               | -----PFTQ-----                                                   | 524  |
| XP_024095245.1[P.abelii]        | -----PFTQ-----                                                   | 524  |
|                                 |                                                                  |      |
| XP_019852971.1[A.queenslandica] | ---ASPNVQEGRPSPRSGSKEEVFVRKWLQWRSEMDTEISELSSSLSATRESLDVAV        | 506  |
| XP_019624636.1[B.belcheri]      | TSEEMAIPSKVHIPCPHVHTKEELAVLQTCCLRWRHEAEKVKGLQDRILYLQAKIENLY      | 576  |
| XP_032826770.1[P.marinus]       | ARQEGGRLEWHGCPAPQAVTALELELRAVLRSRWNQVQRELQDLQDSICRIKRTIDILMY     | 960  |
| XP_032229076.1[N.vectensis]     | ---T---RTPSLHPAPRYVTELELETIATSLSRWRTEVEQDVLQDLSLKEVEEASVMY       | 541  |
| XP_013993323.1[S.salar]         | ---SRLPPDLPMHPAPRHITEELRVLEGCLHRWRSEVENDTHDLQDSISRIHRTIELMY      | 584  |
| OCT93923.1[X.laevis]            | ---SRIPPDLPMPHPAPRHITEELSVLEGCLHRWRTEVETDTRDLQDSISRIHRTIELMY     | 573  |
| XP_040518387.1[G.gallus]        | ---SRIPPDLPMPHPAPRHITEELSVLEGCLHRWRTEVENDTRDLQDSISRIHRTIELMY     | 575  |
| NP_038946.2[M.musculus]         | ---SRIPPDLPMPHPAPRHITEELSVLEGCLHRWRTEVENDTRDLQDSISRIHRTIELMY     | 582  |
| Q9UHP3[H.sapiens]               | ---SRIPPDLPMPHPAPRHITEELSVLEGCLHRWRTEVENDTRDLQDSISRIHRTIELMY     | 581  |
| XP_024095245.1[P.abelii]        | ---SRIPPDLPMPHPAPRHITEELSVLEGCLHRWRTEVENDTRDLQDSISRIHRTIELMY     | 581  |
|                                 |                                                                  |      |
| XP_019852971.1[A.queenslandica] | SDPSMNRSTYHLHSLVHQQASRGHYWAYVRKKTKKKRATREMGQIASYLDDEQTEEE        | 566  |
| XP_019624636.1[B.belcheri]      | EDNSLKQVPYQLHAVLVHEGQASAGHYWAYVRDHT-----S-----                   | 611  |
| XP_032826770.1[P.marinus]       | TDKTFRQLPYRLHAVLVHDDGQAMAGHYWAYVREHARLPAAAASSSS-----             | 1008 |
| XP_032229076.1[N.vectensis]     | NOEEMKTIPIYRLHAVLVHEGQANAGHYWAYINDPL-----                        | 576  |
| XP_013993323.1[S.salar]         | SDKSMQVVFRLHAVLVHEGQANAGHYWAYIYDPH-----                          | 619  |
| OCT93923.1[X.laevis]            | SDKSMQVVPYRLHAVLVHEGQANAGHYWAYIFDHH-----                         | 608  |
| XP_040518387.1[G.gallus]        | FDKSMIQVVPYRLHAVLVHEGQANAGHYWAYIYDHH-----                        | 610  |
| NP_038946.2[M.musculus]         | SDKSMIQVVPYRLHAVLVHEGQANAGHYWAYIYDHR-----                        | 617  |
| Q9UHP3[H.sapiens]               | SDKSMIQVVPYRLHAVLVHEGQANAGHYWAYIYDHR-----                        | 616  |
| XP_024095245.1[P.abelii]        | SDKSMIQVVPYRLHAVLVHEGQANAGHYWAYIYDHR-----                        | 616  |
|                                 |                                                                  |      |
| XP_019852971.1[A.queenslandica] | GVDKSSSEKKEEGEGHEDMEVTTTGGDDTVETFSPLSSCEPSSGPASVAPPEVKKEEG       | 626  |
| XP_019624636.1[B.belcheri]      | -----SSGNSASSNSNSVSGASD-----                                     | 611  |
| XP_032826770.1[P.marinus]       | -----SSGNSASSNSNSVSGASD-----                                     | 1025 |
| XP_032229076.1[N.vectensis]     | -----                                                            | 576  |
| XP_013993323.1[S.salar]         | -----                                                            | 619  |
| OCT93923.1[X.laevis]            | -----                                                            | 608  |
| XP_040518387.1[G.gallus]        | -----                                                            | 610  |
| NP_038946.2[M.musculus]         | -----                                                            | 617  |

|                                 |                                                                     |      |
|---------------------------------|---------------------------------------------------------------------|------|
| Q9UHP3[H.sapiens]               | -----                                                               | 616  |
| XP_024095245.1[P.abelii]        | -----                                                               | 616  |
| XP_019852971.1[A.queenslandica] | SKEDDEEIIWLKYNDSVTTVDWEEVKRESFGRGESACNSNGPGTNTSAYCLLYVNSEA          | 686  |
| XP_019624636.1[B.belcheri]      | -----QNRWLKFNVDVVTGMSWGLLRESEGG-Y-----HHASAYCLMYIDITR               | 654  |
| XP_032826770.1[P.marinus]       | ESSGSDSCWRKFNDVRVSRASWELVRDSYGGGA-----RSASAYCLYVYNARA               | 1074 |
| XP_032229076.1[N.vectensis]     | -----DRWRKFNDDTVSEVTWEEVERESLGG-Y-----RNVSYAYCLLYCDARR              | 619  |
| XP_013993323.1[S.salar]         | -----QQRWKMKNYDISVTKSSWEEELVRDSFGG-Y-----RNASAYCLMYINDKK            | 662  |
| XP_032229076.1[N.vectensis]     | -----EQRWKMKNYDISVTKSSWEEELVRDSFGG-Y-----RNASAYCLMYINDEE            | 651  |
| XP_040518387.1[G.gallus]        | -----QNRWKMKNYDISVTKSSWEEELVRDSFGG-Y-----RNASAYCLMYINDKE            | 653  |
| NP_038946.2[M.musculus]         | -----ESRWKMKNYDIATVTKSSWEEELVRDSFGG-Y-----RNASAYCLMYIDDKA           | 660  |
| Q9UHP3[H.sapiens]               | -----ESRWKMKNYDIATVTKSSWEEELVRDSFGG-Y-----RNASAYCLMYINDKA           | 659  |
| XP_024095245.1[P.abelii]        | -----ESRWKMKNYDIATVTKSSWEEELVRDSFGG-Y-----RNASAYCLMYINDKA           | 659  |
|                                 | : * *: * : * *: * * : * *: * :                                      |      |
| XP_019852971.1[A.queenslandica] | AKTWREE-----VHLLSLGLQRYIAYHNLAFERELKAYDLKVQLQQLTSS--E               | 733  |
| XP_019624636.1[B.belcheri]      | KDLVEVKLQW-----SQYDELKLMVLAENERFIAQQRDLESKQRRTMVVR----              | 699  |
| XP_032826770.1[P.marinus]       | HDFTSEL-----AGEAVGDLSSLSPALRDLVAKDNHRFLSEAMMRGNPGERPAEPADARE        | 1130 |
| XP_032229076.1[N.vectensis]     | EEVIRAGN-----TPEVLSAELQQMVEDNASFEQLRDWDEKQAKAAKEAKS----             | 667  |
| XP_013993323.1[S.salar]         | PFLIEEEFDKETGQMLSGLDKLPDSLDAKYVKEDNGLFDKMEEDWDLQARKAQEKL---         | 719  |
| XP_032229076.1[N.vectensis]     | KCLMQEEYDKETGQVLKGMIDILPLDLREYIKEDNRRFEKELEEDWDLQARKAQEKL---        | 708  |
| XP_040518387.1[G.gallus]        | QYLIEEEFNKETGQILVGMIDTLPDLRDFVEEDNRRFEKELEEDWDLQARKAQEKL---         | 710  |
| NP_038946.2[M.musculus]         | QFLIQEEFNKETGQALVGMETLPPDLRDFVEEDNRRFEKELEEDWDLQARKAQEKL---         | 717  |
| Q9UHP3[H.sapiens]               | QFLIQEEFNKETGQPLVGIEITLPPDLRDFVEEDNRRFEKELEEDWDLQARKAQEKL---        | 716  |
| XP_024095245.1[P.abelii]        | QFLIQEEFNKETGQPLVGIEITLPPDLRDFVEEDNRRFEKELEEDWDLQARKAQEKL---        | 716  |
|                                 | : * : * : * *: * :                                                  |      |
| XP_019852971.1[A.queenslandica] | -G-----KEL-----IKPAKAVRFE-YPK-----                                  | 750  |
| XP_019624636.1[B.belcheri]      | -----EEDPPAN-----HGRGQGTSESSSSEVA--                                 | 723  |
| XP_032826770.1[P.marinus]       | PGQRAEPREHEQEERRHEGGEQAPARAAPAAAAAASREGGSGGAAREQERADKHSQ            | 1190 |
| XP_032229076.1[N.vectensis]     | -----QALVVARPDLVLA-----EA-----                                      | 683  |
| XP_013993323.1[S.salar]         | -----ALAAAA-----ATA-----ET-----                                     | 731  |
| XP_032229076.1[N.vectensis]     | -----ILAQKAL-----K-----                                             | 716  |
| XP_040518387.1[G.gallus]        | -----LSQIPR-----                                                    | 716  |
| NP_038946.2[M.musculus]         | -----LAAPKLR-----E-----                                             | 725  |
| Q9UHP3[H.sapiens]               | -----LASQKLR-----E-----                                             | 724  |
| XP_024095245.1[P.abelii]        | -----LASQKLR-----E-----                                             | 724  |
| XP_019852971.1[A.queenslandica] | -----                                                               | 750  |
| XP_019624636.1[B.belcheri]      | -----DQPIQ-----GQEHVRDVQRKQ-----P                                   | 741  |
| XP_032826770.1[P.marinus]       | TNSLEQEAEPTRERVDGRARAGEREETRVHEGRAPDVASISSETQRQGSADGSASLPGR         | 1250 |
| XP_032229076.1[N.vectensis]     | -----SCAVSP-----                                                    | 693  |
| XP_013993323.1[S.salar]         | -----TTSHQ-----MSTE-----                                            | 741  |
| XP_032229076.1[N.vectensis]     | -----                                                               | 716  |
| XP_040518387.1[G.gallus]        | -----A-----                                                         | 717  |
| NP_038946.2[M.musculus]         | -----A-----                                                         | 726  |
| Q9UHP3[H.sapiens]               | -----S-----                                                         | 725  |
| XP_024095245.1[P.abelii]        | -----S-----                                                         | 725  |
| XP_019852971.1[A.queenslandica] | GEEDPGASTNGGHDMMALASDAKRARAGSPSNLEDMQIDLDNLFPVDPALLNQ-----          | 803  |
| XP_019624636.1[B.belcheri]      | PQVKPKPVTTETQQGVRLGRSTQQSTP-----LD-----HSGH-----                    | 774  |
| XP_032826770.1[P.marinus]       | GTSAPSPSPSGTEEYMKVGPDTPTTEKP-----RVERVVEV-----SIPDVGTVVQAEHGYND     | 1304 |
| XP_032229076.1[N.vectensis]     | AAAA-----SES-----VLTA-----NLGVL-----                                | 710  |
| XP_013993323.1[S.salar]         | PSPDPSWGPQQDPEYMEQPSPTDDSKH-----LQED-----TERAI-----                 | 777  |
| XP_032229076.1[N.vectensis]     | QAPLVAAAPNEPEYMEQPARADAPNE-----TSEE-----TTNVI-----                  | 752  |
| XP_040518387.1[G.gallus]        | PAPSPAPVQAGEPEYLEQPSKRTDLSKH-----LKED-----SVQAI-----                | 753  |
| NP_038946.2[M.musculus]         | EASATTAAQA-GGADYLEQPSKSDLSKH-----WKEE-----TLRVI-----                | 761  |
| Q9UHP3[H.sapiens]               | ETSVTTAAQAAGDPEYLEQPSRSDFSKH-----LKEE-----TIQII-----                | 761  |
| XP_024095245.1[P.abelii]        | ETSVTTAAQAAGDPEYLEQPSRSDFSKH-----LKEE-----TIRII-----                | 761  |
|                                 | : :                                                                 |      |
| XP_019852971.1[A.queenslandica] | -----LSMRLSDKLMQFIQDVPGTIIIESRLL-----                               | 829  |
| XP_019624636.1[B.belcheri]      | -----VL-----QATMKITILEVSNIEQEQGPEK-----ALIKAVNIEYHRLSLVEKIGISR----- | 820  |
| XP_032826770.1[P.marinus]       | EVMLTPAMQGVLMVAVARARLVREAQGPAA-----TLIEAFRVEYARLRLTAQESYPDASSP      | 1360 |
| XP_032229076.1[N.vectensis]     | -----P-S-----LVDSGSKLTIIDEAITQWNCNEKTRLDKLAREYPPY-----              | 749  |
| XP_013993323.1[S.salar]         | -----S-KAAAEQEEERSPEG-----LLTAAIKVEYTRLLRFAQEDTA-P-----             | 815  |
| XP_032229076.1[N.vectensis]     | -----T-QAATE-SEDKGPEA-----VLQMAIKTEYARLVKLQEDPL-P-----              | 789  |
| XP_040518387.1[G.gallus]        | -----N-KALAE-QEDRGPEA-----IMDTAIKLEYTRLLKLQEDPP-P-----              | 790  |
| NP_038946.2[M.musculus]         | -----A-KASHD-LEDKGPET-----VLQSAIKLEYARLVKLQEDTP-P-----              | 798  |
| Q9UHP3[H.sapiens]               | -----T-KASHE-HEDKSPET-----VLQSAIKLEYARLVKLQEDTP-P-----              | 798  |
| XP_024095245.1[P.abelii]        | -----T-KASHE-HEDKSPET-----VLQSAIKLEYARLVKLQEDTP-P-----              | 798  |
|                                 | : :                                                                 |      |
| XP_019852971.1[A.queenslandica] | -----TDFHYAHACQTSSEKVRQAILYEHVIQD-LKR-EN                            | 861  |
| XP_019624636.1[B.belcheri]      | -----QYDPRLEHCVVYLIINGAARVIVERTLVEQFADRGLSGDSK                      | 861  |
| XP_032826770.1[P.marinus]       | ASPPPLAPAGASGAATWAGREERLEHVYIYLFQNEAPNRVVERALLEQFADRNLSYDEQ         | 1420 |
| XP_032229076.1[N.vectensis]     | -----PGDVRLEHLGTYLMLKCSAPDFTYVECALLESYDEVHAKDQS                     | 790  |
| XP_013993323.1[S.salar]         | -----ENDYRLQHVIVYFTHNQAPKKIIEKTLLEQFADRNLSDFER                      | 856  |
| XP_032229076.1[N.vectensis]     | -----EIDYRLQHAIVYFIQSQAPKKIIEKTLLEQFADRNLSDFER                      | 830  |
| XP_040518387.1[G.gallus]        | -----ECDYRLRHAIVYFIQSQAPKKIIEKTLLEQFADRNLSDFER                      | 831  |
| NP_038946.2[M.musculus]         | -----ETDYRLHHVYFIQSQAPKKIIEKTLLEQFADRNLSDFER                        | 839  |
| Q9UHP3[H.sapiens]               | -----ETDYRLHHVYFIQSQAPKKIIEKTLLEQFADRNLSDFER                        | 839  |
| XP_024095245.1[P.abelii]        | -----ETDYRLHHVYFIQSQAPKKIIEKTLLEQFADRNLSDFER                        | 839  |
|                                 | : * : * : * *: * * : * *: * :                                       |      |
| XP_019852971.1[A.queenslandica] | DLNMSLIARKYFVEICKDPQIYQELQDVRLLYSRFSCCYHFQISVNEAKRNSWCLSLAH         | 921  |
| XP_019624636.1[B.belcheri]      | STIEMKVAQSKLIMQLSEENLKAYEKWHADYGLFQKTVMLLGLGIEFFHQERFPEALTY         | 921  |
| XP_032826770.1[P.marinus]       | LKIMKVAQAKLQEISPEDMDPAEYQKWHQYELFRQVCVYLVMGIEKYQGRVTEALPC           | 1480 |
| XP_032229076.1[N.vectensis]     | LMPYRKVKQVEFLERE-KGTDRADYKRWKEMMTYFKLINSCLFTGLEHFSQKYKESLPY         | 849  |
| XP_013993323.1[S.salar]         | CKSIMKVARAKLDLVKPEEVNMEYEMHQDYRNFRETTTIFIMIGLELFGKKCFVEALMY         | 916  |
| XP_032229076.1[N.vectensis]     | CRNIMKVAQAKLEMIKPEDEVNMEYERKWHQDYRNFRETTTIILIGLELFGQNSYVEALLY       | 890  |
| XP_040518387.1[G.gallus]        | CRNIMKVAQAKLEMIKPEDEVNMEYERKWHQDYRNFRETTTIILIGLELFGQNSYVEALLY       | 891  |
| NP_038946.2[M.musculus]         | CHNIMKVAQAKLEMIKPEEVNLEEYEEWHADYKFRETTTIILIGLENFQRESYIDSLLF         | 899  |
| Q9UHP3[H.sapiens]               | CHNIMKVAQAKLEMIKPEEVNLEEYEEWHADYKFRETTTIILIGLENFQRESYIDSLLF         | 899  |
| XP_024095245.1[P.abelii]        | CHNIMKVAQAKLEMIKPEEVNLEEYEEWHADYKFRETTTIILIGLENFQRESYIDSLLF         | 899  |
|                                 | : : : * : * : * : * : * : * :                                       |      |
| XP_019852971.1[A.queenslandica] | IINCIFYLNSISAAQAGDK-YSLDQQLLGRFRCKALLMVSIEGTVAFTSGEVS---SSIVI       | 977  |
| XP_019624636.1[B.belcheri]      | LVHAWTYNQQLLGEKKNYIMADSSLTTHYRTQCLKLSLSEQACSLFESGDTEVDEGLQL         | 981  |
| XP_032826770.1[P.marinus]       | LMHAHVAEENELAR-QOR-RGVRRDVLARYRVVCRVRNVEACALFTGTGDVAQATSLAV         | 1538 |
| XP_032229076.1[N.vectensis]     | LVHAYELNRKLSDPNTNA-RSMDQRLLAHCRVCFCLKLNELASLFSDDYKTLCEGLDL          | 908  |
| XP_013993323.1[S.salar]         | LIYSYQYNKELLVK-GLY-RGHDELISHYRRECLLKLNENAMFESGEEPEVNCGLSI           | 974  |
| XP_032229076.1[N.vectensis]     | LIYGYQYNKELLVK-GLY-RGHDELISHYRRECLLKLNENAMFESGEEPEVNCGLSI           | 948  |
| XP_040518387.1[G.gallus]        | LIYAYQNNKELLVK-GPY-RGHDEELISHYRRECLLKLNENAMFESGDDQEVNNGLI           | 949  |
| NP_038946.2[M.musculus]         | LIYAYQNNKELLVK-GPY-RGHDEELISHYRRECLLKLNENAMFESGDDQEVNNGLI           | 957  |
| Q9UHP3[H.sapiens]               | LICAYQNNKELLVK-GLY-RGHDEELISHYRRECLLKLNENAMFESGDDQEVNNGLI           | 957  |
| XP_024095245.1[P.abelii]        | LICAYQNNKELLVK-GLY-RGHDEELISHYRRECLLKLNENAMFESGDDQEVNNGLI           | 957  |
|                                 | : : * : * : * : * : * : * :                                         |      |
| XP_019852971.1[A.queenslandica] | GNDIYIVPGLKAFSLHP-----FPFGDSILEKVRREWCQCLDQSSLETDDSD                | 1022 |
| XP_019624636.1[B.belcheri]      | MVELVVPQCMALQELG-----GTDSQDAIEAIEIRSNWCYDLQG-DLPDWCQ                | 1026 |

|                                 |                                          |                                |      |
|---------------------------------|------------------------------------------|--------------------------------|------|
| XP_032826770.1[P.marinus]       | MTLVLPLAMALLAPLGSSCEGGDAGDEAAVARES       | DLCAVELMRDRWCSYLGRDDMASELQ     | 1598 |
| XP_032229076.1[N.vectensis]     | VSEQVVPCIPQLVTSP-----                    | Y-AEDREAVEHMRNNWFTYLGQ-TVDEKRQ | 952  |
| XP_013993323.1[S.salar]         | MNELVVPCIPLLLVHD-----                    | T-EKDLLAVEDMRNRWCSYLGQ-EMEPNLQ | 1018 |
| OCT93923.1[X.laevis]            | MNELIVPCIPLLLVDD-----                    | MEEKDIVAVEDMRNRWCSYLGQ-EMEPNLQ | 993  |
| XP_040518387.1[G.gallus]        | MNELIVPCIPLLLVDE-----                    | MEEKDIVAVEDMRNRWCSYLGQ-EMEPNLQ | 994  |
| NP_038946.2[M.musculus]         | MNEFIVPFPLPLLVDD-----                    | MEEKDILAVEDMRNRWCSYLGQ-EMEANLQ | 1002 |
| Q9UHP3[H.sapiens]               | MNEFIVPFPLPLLVDE-----                    | MEEKDILAVEDMRNRWCSYLGQ-EMEPHLQ | 1002 |
| XP_024095245.1[P.abelii]        | MNEFIVPFPLPLLVDE-----                    | MEEKDILAVEDMRNRWCSYLGQ-EMEPHLQ | 1002 |
|                                 | : : * : :                                | * * : * . * * . :              |      |
| XP_019852971.1[A.queenslandica] | DKLADLLMKIVEDYSKAPNIK-----               | IPQA                           | 1047 |
| XP_019624636.1[B.belcheri]      | EKLQDFLPQLLDCSGD-----                    | LQQLRTPPA                      | 1051 |
| XP_032826770.1[P.marinus]       | ELLTDFLPRLLDYQPE-PAPPTQLTPPLQGPPPPPPPPSE | PKCESSGENWRGLRAPPR             | 1657 |
| XP_032229076.1[N.vectensis]     | EKLQDFLPKLLDGGTD-----                    | GNFEEMRPPPV                    | 979  |
| XP_013993323.1[S.salar]         | EKLTDFLPKLLDCSTE-----                    | IKSFHDPPK                      | 1043 |
| OCT93923.1[X.laevis]            | EKLTDFLPKLLDCSTE-----                    | IKGLNDPPK                      | 1018 |
| XP_040518387.1[G.gallus]        | EKLTDFLPKLLDCSTE-----                    | IKGFNDPPK                      | 1019 |
| NP_038946.2[M.musculus]         | EKLTDFLPKLLDCSTE-----                    | IKGFHEPPK                      | 1027 |
| Q9UHP3[H.sapiens]               | EKLTDFLPKLLDCSME-----                    | IKSFHEPPK                      | 1027 |
| XP_024095245.1[P.abelii]        | EKLTDFLPKLLDCSME-----                    | IKSFHEPPK                      | 1027 |
|                                 | : * * * : : : :                          | *                              |      |
| XP_019852971.1[A.queenslandica] | PSNFDTQRLAAQYTTAYKTLTSEILL----           | 1073                           |      |
| XP_019624636.1[B.belcheri]      | V--WPSQHIAEFSTVMQAVVLAEPDITVD--          | 1078                           |      |
| XP_032826770.1[P.marinus]       | LKAYSPHTLAERMAEVLVRNR--                  | PREA--                         | 1682 |
| XP_032229076.1[N.vectensis]     | MRPTNSKDLCEFRFRAMEIVHANMFFAANKA          | 1009                           |      |
| XP_013993323.1[S.salar]         | LPTYSTLELVERYGRVMASLC--                  | WFAALGR                        | 1071 |
| OCT93923.1[X.laevis]            | LPNFSHELCECFARIMLSLSR--                  | MFALGR                         | 1046 |
| XP_040518387.1[G.gallus]        | LPSYSTHELCECFARIMLSLSR--                 | TFALGR                         | 1047 |
| NP_038946.2[M.musculus]         | LPSYSTHELCECFARIMLSLSR--                 | TFALGR                         | 1055 |
| Q9UHP3[H.sapiens]               | LPSYSTHELCECFARIMLSLSR--                 | TFALGR                         | 1055 |
| XP_024095245.1[P.abelii]        | LPSYSTHELCECFARIMLSLSR--                 | TFALGR                         | 1055 |
|                                 | *                                        |                                |      |
