# Supplementary material for: An Evolutionary Perspective on the Origin, Conservation and Binding Partner Acquisition of Tankyrases
Source: MDPI journal article supplement (doi:10.3390/biom12111688), 2022-11-15
Supplement: s1 [file s1]

# PEX14

## Homo sapiens:

>O75381 PEX14 [Homo sapiens]  
MASSEQAEQPSQPSSTPGSENVLPREPLIATAVKFLQNSRVRQSPLATRRAFLKKKGLTD  
EEDIMAFQSGTADEPSSLGPATQVVVPQPHLISQPYSPAGSRWRDYGALAIIMAGIA  
FGFHQLYKKYLLPLILGGREDRKQLERMEAGLSELSGSVAQTVTQLQTTLASVQELLIQQ  
QQKIQELAHELAAAKATTSTNWILESQNINELKSEINSLKGLLLNRRQFPSPSPAKIPS  
WQIPVKSPSPSSPAAVNHHSSSDISPVSNESTSSSPGKEGHSPEGSTVTYHLLGPQEEGE  
GVVDVKGVQV**RMEVQGE**EKKREDKEDEEDEDVSHVDEEDCLGVQRED**RGSGSG**NEQ  
VEKLRRPEGASNESESD

## Pongo abelii:

>XP\_024109019.1 peroxisomal membrane protein PEX14 isoform X1 [Pongo abelii]  
MASSEQAEQPSQPSSTPGSENVLPREPLIATAVKFLQNSRVRQSPLATRRAFLKKKGLTDEEIDMAFQQS  
GTAADEPSSLGPATQVVVPQPHLVSQPYSPAGSRWRDYGALAIIMAGIAFGFHQLYKKYLLPLILGGRE  
DRKQLERMEAGLSELSGSVAQTVTQLQTTLASVQELLIQQQQKIQELAHELAAAKATTSTNWILESQNIN  
ELKSEINSLKGLLLNRRQFPSPSPAKIPSWOIPVKSPSPSSPAAVNHHSSSDISPVSNESTSSSPGKEG  
HSPGSGTVTYHLLGPQEEGEGGVVDVKGV**RMEVQGE**EKKREDKEDEEDEDVSHVDEEDCLGVQRED**RGSGSG**NEQVEKLRRPEGASNESESD

## Mus musculus:

>NP\_062755.1 peroxisomal membrane protein PEX14 [Mus musculus]  
MASSEQAEQPNQPSSPPGSENVVPREPLIATAVKFLQNSRVRQSPLATRRAFLKKKGLTDEEIDLAFQQS  
GTAADEPSSLGPATPVVPQPHLTPQPYSPRGSWRDYGALAIIMAGIAFGFHQLYKRYLLPLILGGRE  
DRKQLERMAASLSELSGTVAQTVTQVTTLASVQELLRQQQQKQVQELAHELATAKATTSTNWILESQNIN  
ELKSEINSLKGLLLNRRQFPSPSPAKIPSWOIPVKSSSPSSPAAVNHHSSSDISPVSNESTSSSPGKDS  
HSPGSGTATYHLLGPQEEGEGVLGVKGV**RMEVQGE**EKKREDKEDEEDEDVSHVDEEDVLGVQRED**RGSGSG**NEQVEKLRRPEGASNETERD

## Gallus gallus:

>XP\_001234697.3 peroxisomal membrane protein PEX14 [Gallus gallus]  
MASSEQAEQPSQAGSSPATENAAAREPLIVTAVKFLQNPVRVQSPATRRAFLKKKGLTDEEIDLAFQQS  
GTSADEPSPGFPSSQLVPAQPAHPVYVNPFGSRWRDYGALAIIMAGIAFGFHQLYKKYLLPLIMGKEDR  
KQLQRIESNIAEMSGSVTQTQVTLQTLAAVQEMLIQQQQKIQELTQELAAKATTSTNWILESQNINEL  
KSEIYSIKGLLLNRRQFPSPSPAKIPSWOIPVKSPSPSNPVVANHHSSSDISPVSNESTTSPVKENHS  
PEGSKVCHLLSTEEGNKAVIDKSGV**RMEVQGE**EKKRENKRNEEEDEDEDVSHVDEEECMGVQTED  
**RGSGSG**NEQVEKLRRPEGASNENEID

## Xenopus laevis:

>XP\_018081136.1 PREDICTED: peroxisomal membrane protein PEX14-like [Xenopus laevis]  
MASSSQDQDSQGGSPSLINEKIVPRDQLIATAVKFLQNPVRVQSPVATRKEFLKKKGLSNEEIELAQQS  
GTVHDDPGLVTHGTGIPHTPGSSQLAVQQFSPPGSRWREYALAIILAGIAFGFHQLYKRYLLPLILGGRE  
SRKQLQRIESGVSEMSGSVTQTQVTLQTLAAVQELLIQQQQKIQELSELASAKASSSTNTILESQNIQ  
ELKSEIYSIKGLLLNRRQFPSPSPASKIPAWOIPVKPPTLPSPAVLNHHSSSDISPVSNESGSSSPVKEI  
HSPGTGKSSHHGLTTEESEIDVQTQV**RMEVQGE**EENEDDVQPDQDCIGVQTED**RGSGSG**NEQVQDK  
LRRPEGASNEMDC

## Salmo salar:

>XP\_014001298.1 PREDICTED: peroxisomal membrane protein PEX14 [Salmo salar]  
MASSQPDQDPQTQPRAPSRDDVAPREAMIATAVKFLQNHKVRQSPLETRKVFLLKKKGLTDKBIELAIQRSG  
STDEPLALTVPVGQYVPLLDQQLAIPYSPRGYRWRDYGALTVIMMGMAFGHHLYKKYILPLIMGSKEDK  
KHQRIESNIAEMSGTLTQTQVTLQTLATVQDLLVQQQKIHDLSELSTSEASSSTNRILDTQTIGDL  
KAEISGLKGLLLGRRQFPASPSVPKIPSWQMPFLKPDITSTSSPINHTNHHSSSDISPVSNESASSSPIKDG  
HHSPPQDALGPDGAGHLNGKNGVGLGGGATLPLDLKDQV**RMEVQGE**EKKKEEDVKEEKEEEEEEEDDVS  
HVDEEHLVSPAED**RGSGSG**NEQVQDKLRRPEGASNESEVD

## Petromyzon marinus:

>XP\_032819505.1 peroxisomal membrane protein PEX14-like isoform X3 [Petromyzon marinus]  
MADTEREVDVAVIGNASREHLVDTAFAKFLKNPRVAGSPPNIQRAFLRKKKGLTDVIEDVFLRAGVHRGTSL  
AHAQHLAQSPAGPPASRHSWRWRDYGALSAVIAAIGFGINRLYKWLAAVRAAEAQRLTDVETVSAMAAS  
LTHAVTQLQTSVAGTHELLSRQKQLERLTDDTAVSKASGPLLADLRTEIASIKGLMLGRKQFPFCPPNSA  
AILPSWQLALKPSTSTGTTISSTMTSQDVNAATNKEQQLQPRENTDTLTGSSSENVSSSDISPSISHESASP  
GLDSEVHTLKAEGKVNLSLQSLTQNGEVGGDFIHQHQDEDEVITEVCVLTKTVEAQGENEVD

## Branchiostoma belcheri:

>XP\_019628140.1 PREDICTED: LOW QUALITY PROTEIN: peroxisomal membrane protein PEX14-like [Branchiostoma belcheri]  
MAAPDPKSSPKDEGSPSDVPLNPEPRQCMETAVKFLQNPVRVQSAFAQRAFLQKKGLTNEEIQLAIEK  
SGTASDETNPPPPPPQAQSTAPVFLQPPVIVPVSPTSXKWRMGAVIVLVGGALYGLYRLFQAYLVPLW  
KTRQEEQRRLERIEAAVTELSASVNYKTVGELQTSMGVVQQAALTKQSDRVQIEISMELAAGKSTARVFESQS  
VSELKAEITSLKGLLLSRXYTKYLTDHYTFPPTPSPTPIIPSWQMEPVDSSASSSSKPAATTSSEVSPAEO  
PLPADSNHAAETLDVAQNNGPSAQTVSTSESSEDTSSSIHVHNSNPLDDLSSGEMEAKGQMEVKGQMEV  
KGEEVTAENVHQGEEDNREETVIKEA

## Drosophila melanogaster:

>NP\_649253.1 peroxin 14 [Drosophila melanogaster]  
MSSNNTDQDGTVMATATSVQNQDVEAGVDEQLPRESLITTAVSFLQNTKVRHTTLTIKQKQFLRSKGLTAH  
BIQLACERAGVFTQDPNKNPNPNPTVISIGSQLHALQPQPTVLGRIREIIHSAALFSGVVYAVYIFWKQY  
IAPYLFKGSKKKAVDEVLDIDKKVETRNDLNKEILAVRDLITTQQREHAQQLNREFSNFRSDDLDAIKG  
LLNLRKQFAGPVAPIAVPSIPAWQLAGSPHHHHRHSGSDNEKGGDAGSGSGSSETVVTFNKSDSLEIM

## Hydra vulgaris:

>XP\_004208685.1 PREDICTED: peroxisomal membrane protein PEX14-like [Hydra vulgaris]  
MKVDSNEEDVSKKVDVAVRFLSNPNVKSINKESEAFLSKGLNDEMELNAMQKASSECEIAESNRKWSIF  
TYFKGIVILGAGILSAANYAYKAYILPPIVAHEIKDDGRIERLGEISVQAMKDDIKQHTVELSSTLKDIQTVL  
EKQHKVIVILLQESIQNSPFDHTTLADIKAELSNVKTMMLSRKQFPKAPFTQQSNEIPAWQRVDNKKKTVDV

STDDTSSSETI

### **Nematostella vectensis:**

>XP\_032228851.1 peroxisomal membrane protein PEX14-like [Nematostella vectensis]  
MADPKEANMEEATNADSKQKKIATAVKFLQNPRVRSTPMSQRRAFLEKKGLTKEEIDLAVEQSGTAGDVV  
SVQAPSAITPYQTQVQRVAPLPYTWRGYLGAAVIGGSLGYIIVTVFKKFILPLITHKKQKDERLRAIENS  
VGELSNVMDTVGGVQTTLDSVQKLLIEQQKQIICLSADLSSTQEKVEQLPTESYSVNDLKSEIISLKGL  
LLNRKAFPSPLDNSTPAGIPSWQRAVTA GADSRITDSASTSFAASKRNDGGQITESGTYNSSRKKASYE  
SEHKSMNGEISSEKKKKTPEKKETPPEVPQEMEHSNHNESDITDTNTVKSAITNENLDDAVLVDSQDI  
SLQSNDTSSASSLSDMSANASFNEESIAFSSTCIKVPFAEASKSEELPSASAIEVD

### **Amphimedon queenslandica:**

>XP\_003385343.1 PREDICTED: peroxisomal membrane protein PEX14-like [Amphimedon queenslandica]  
MAAMSSESTSAASSPEVNGASTDPIKGSFVPRDSSYSEFMRRLLPERQKLLDIAVKFLINPRVVNSNDDD  
KIAFLNKKGLNEEEIYWVRQEAAASRPAPSLAVPAPPTSLALTTPTQATPTLTHLVIRGVLVGSMTGFIY  
WIKGVVSKWFDLKVQQRHQVLEERVQEI RTTLETMTMQLQTTLSIKVLLERQQEQITQLSSTQSNVV  
ASNELRTINSELSTLKGLLLNHRHQFPTPQKDNLSLPPGIPSWQRNTSLPPLNTNGSSKEQEASGDGGG  
GGGESSTGTTVQQNSNNNDNDEEDDD

## Alignment

|                                 |                                                               |     |
|---------------------------------|---------------------------------------------------------------|-----|
| NP_649253.1[D.melanogaster]     | MSSNNTD-----TG-D-----TTVMATATSVQNDVEAGVDEQLPRESLITTAVSF       | 44  |
| XP_003385343.1[A.queenslandica] | MAAMSSSESTSAASSPEVNGASTDPIKGSFVPRDSS---YSEFMRRLLPERQKLLDIAVKF | 57  |
| XP_032819505.1[P.marinus]       | MADT-----ER-----E-----VDVIGNASREHLVDTAFAKF                    | 27  |
| XP_004208685.1[H.vulgaris]      | MADP-----KEA-----N-----MKEVSDNEDVDSKKVDVAVRF                  | 20  |
| XP_032228851.1[N.vectensis]     | MAAP-----DPKSSPKDEGSP-----MEEATNADSKQKQIATAVKF                | 28  |
| XP_019628140.1[B.belcheri]      | MASS-----EQP--DPOTQP-R-----SDVPLNPEFRQQMIIATAVKF              | 36  |
| XP_014001298.1[S.salar]         | MASS-----DQT--DQSVQCGP-----APSRDDVAPREMIATAVKF                | 34  |
| XP_018081136.1[X.laevius]       | MASS-----EQA-EQPSQAGS-----SPATENAAAREPLIVTAVKF                | 35  |
| XP_001234697.3[G.gallus]        | MASS-----EQA-EQPSQPS--TPGSENVLPREPLIATAVKF                    | 35  |
| 075381[H.sapiens]               | MASS-----EQA-EQPSQPS--TPGSENVLPREPLIATAVKF                    | 35  |
| XP_024109019.1[P.abelii]        | MASS-----EQA-EQNPQPS--PPGSENVVPREPLIATAVKF                    | 35  |
| NP_062755.1[M.musculus]         | . : * . *                                                     |     |
| NP_649253.1[D.melanogaster]     | LQNTKVRHTTLIQKQFLRSKGLTAHEIQLACERAGVFTQDPNKPFPNPNFTVISIGSQLH  | 104 |
| XP_003385343.1[A.queenslandica] | LINPRVVNSNDDDKIAFLNKKGLNEEIIYWRQEASRPAPSIAVPAPPTSLALT--PTQ    | 116 |
| XP_032819505.1[P.marinus]       | LKNPRVAGSPPNIQRAFLRKKGLTDVEIEDVFLRAGVHRGTSLAHAQH-----LAQSP    | 80  |
| XP_004208685.1[H.vulgaris]      | LSNPNVKSTNKESKEAFLKSKGLNDMEILNAMQKASSECEIA-----               | 62  |
| XP_032228851.1[N.vectensis]     | LQNPRVKRSTPMSQRRAFLEKKGLTKEEIDLAVEQSGTAGDVSVQAPS-----A        | 77  |
| XP_019628140.1[B.belcheri]      | LQNPRVRQSAFAQRRRAFLKKGTLNEEIQLAIEKSGTASDETNPPTPPPAQVASTAPVP   | 96  |
| XP_014001298.1[S.salar]         | LQNHKVRQSPLETRKVFLLKKGLTDKEIELAQRSGST--DEPLALTPV-----GPQYP    | 86  |
| XP_018081136.1[X.laevius]       | LQNPVRVRQSPVATRKFEFLKKGLSNEEIELAQSGSGTVHDDPGLVTHT-----GIPHT   | 88  |
| XP_001234697.3[G.gallus]        | LQNSRVVRQSPLATRAFLKKKGLTDEEIDLAFQSGSGTSADEPQSPGPS-----SQLVP   | 88  |
| 075381[H.sapiens]               | LQNSRVVRQSPLATRAFLKKKGLTDEEIDMAFQSGSGTAADEPSSLGPA-----TQVVP   | 88  |
| XP_024109019.1[P.abelii]        | LQNSRVVRQSPLATRAFLKKKGLTDEEIDMAFQSGSGTAADEPSSLGPA-----TQVVP   | 88  |
| NP_062755.1[M.musculus]         | * * . * : : * . * . * . * . * . *                             |     |
| NP_649253.1[D.melanogaster]     | ALQ-----PQPTVLGRIREIISHAALFSGVVYAVYIFWKQYIAPYLF-GKSKK----KA   | 153 |
| XP_003385343.1[A.queenslandica] | ATP-----TLTH--LVIRGVLVSGMFGIYFIWKGVVSKWFDLSKVQOERHOV          | 162 |
| XP_032819505.1[P.marinus]       | AGP-----PASRHSWRWRDVGALSAVIAAGFGINRKYKWL-----A-VRAEAQRLTD     | 129 |
| XP_004208685.1[H.vulgaris]      | -----ESNKWSIF--TYFKGIVIGAGISAAANYKAYILPVYA-HEIKDDGRIER        | 110 |
| XP_032228851.1[N.vectensis]     | ITPYQTQVQRVAPLPYTWRGYLGAAVIGGSLGYIIVTVFKKFIPLIT-HKKQKDERLRA   | 136 |
| XP_019628140.1[B.belcheri]      | LQPPPVIV-----PVSPWSKWRDMGAVILVGGALYGLYRLFQAYILPWK--TRQEEQRLER | 152 |
| XP_014001298.1[S.salar]         | LDDPQLAPIPYSPRGYRWRYDGAITVIMGMAGFPHHLYKKYILPLIM-GSKEDKKHLQR   | 145 |
| XP_018081136.1[X.laevius]       | GPSSQLAVQQFSPGSRWREYGALAIIMAGIAGFGHQLYKKYLLPLII-GGREDRKQLQR   | 147 |
| XP_001234697.3[G.gallus]        | AQPAHPV---VYNPPGSRWRDYDALAIIMAGIAGFGHQLYKKYLLPLIM-GGREDRKQLQR | 145 |
| 075381[H.sapiens]               | VQPPHLISQPYSPAGSRWRDYDALAIIMAGIAGFGHQLYKKYLLPLII-GGREDRKQLQR  | 147 |
| XP_024109019.1[P.abelii]        | VQPPHLVSPQYSPAGSRWRDYDALAIIMAGIAGFGHQLYKKYLLPLII-GGREDRKQLQR  | 147 |
| NP_062755.1[M.musculus]         | VQPPHLTPQPYSPGSRWRDYDALAIIMAGIAGFGHQLYKKYLLPLII-GGREDRKQLQR   | 147 |
| NP_649253.1[D.melanogaster]     | VDEVLDIDKKVETRTNDLNKEILAVRDLITQQREHAQQIL-----N                | 195 |
| XP_003385343.1[A.queenslandica] | LEERVQEIIRTTLETTMQRLQQTLLSIKVLLEQQEQIT--TQLSSQT-----SNVVAS    | 212 |
| XP_032819505.1[P.marinus]       | VESTVSAMAASLTTHAVTQLQTSVAGTHELLSRQKQL-ERLTDTDVATSKAS-----G    | 180 |
| XP_004208685.1[H.vulgaris]      | LGESVQAMKDDIKQHTYELSELSTLKDQITVLEKQHKVI-VLLQES-----IQNSPFDH   | 161 |
| XP_032228851.1[N.vectensis]     | IENSUVGELSNSVMDTVGGVQTTLDSVKLLLEQQQKI-ICLSADLSSTQEK-VEQLPTES  | 194 |
| XP_019628140.1[B.belcheri]      | IEAAVTELSASVNKTVGELQTSMGVVQQALTQKSDRV-QEISMELAAKG---STARVFES  | 208 |
| XP_014001298.1[S.salar]         | IESNIAEMSGTLTQTVTQLQOTLAIVQDLLVQQQKI-HDLSQELSTSEASSTNRI-LDT   | 204 |
| XP_018081136.1[X.laevius]       | IESGVSEMSGSVTQTVTQLQOTTLAAVQELLIQQQKI-QELSLELSASKASSNTNILES   | 206 |
| XP_001234697.3[G.gallus]        | IESNIAEMSGSVTQTVTQLQOTTLAAVQELMIQQQKI-QELTQELAASKATTSTNWILES  | 204 |
| 075381[H.sapiens]               | MEAGLSELSGSVAQTVTQLQOTTLASVQELLIQQQKI-QELAHELAAAKATTSTNWILES  | 206 |
| XP_024109019.1[P.abelii]        | MEAGLSELSGSVAQTVTQLQOTTLASVQELLIQQQKI-QELAHELAAAKATTSTNWILES  | 206 |
| NP_062755.1[M.musculus]         | MAASLSSELGTVQTVTQVQOTTLASVQELLRQQQKV-QELAHELATAKATTSTNWILES   | 206 |
| NP_649253.1[D.melanogaster]     | REFSNFRSLDAIKGLLLNRR-----QFAGPVAP---IAVPSIPAWQLAGSPHHHHR      | 244 |
| XP_003385343.1[A.queenslandica] | NELRTINSELSTLKGILLNRR-----QFPTPKQDNLSLPPGISWQRNTSLPLPNT       | 263 |
| XP_032819505.1[P.marinus]       | PLLADLRTEIASIKGLMLGRK-----QFPC--PP--NSAAILPWSQLALKFPSTSTG     | 227 |
| XP_004208685.1[H.vulgaris]      | TTLADIKAEILSNVKTMMLSRK-----QFFKAPRT--QGSNELPAWQRVDNKKVTDV     | 210 |
| XP_032228851.1[N.vectensis]     | YSVNDLKSEIISLKGILLNRR-----AFPSBLDN--STPACTIPSWQRVATGADSR      | 243 |
| XP_019628140.1[B.belcheri]      | QSVSELKAEIISLKGILLSRXVTKYKLTDHVTFPP--TP--SPTPIPSWQMEFVDSASSS  | 264 |
| XP_014001298.1[S.salar]         | QTIGDLKAEIISLKGILLGR--O-----OFFA--SP--SVKPIPSWQMLPKFDTI-S     | 249 |
| XP_018081136.1[X.laevius]       | QNIQELKSEIYSLKGILLNRR-----QFPP--SP--S-ASKIPAWQIPVKPPTL--      | 248 |
| XP_001234697.3[G.gallus]        | QVINELKSEIYSLKGILLNRR-----QFPP--SP--S-APKIPSWQIPVKPSSP--      | 250 |
| 075381[H.sapiens]               | QVINELKSEINSLKGILLNRR-----QFPP--SP--S-APKIPSWQIPVKPSSP--      | 250 |
| XP_024109019.1[P.abelii]        | QVINELKSEINSLKGILLNRR-----QFPP--SP--S-APKIPSWQIPVKPSSP--      | 250 |
| NP_062755.1[M.musculus]         | QVINELKSEINSLKGILLNRR-----QFPP--SP--S-APKIPSWQIPVKSSSP--      | 250 |
| NP_649253.1[D.melanogaster]     | HSGSDDNEKG-----DDAGSGS                                        | 261 |
| XP_003385343.1[A.queenslandica] | TNGSSKE--SQDVNAATNKEQQLQPRENTDTLGSSENVSSSDISPISHESASPLDSEVH   | 283 |
| XP_032819505.1[P.marinus]       | TTISSMTQSDVNAATNKEQQLQPRENTDTLGSSENVSSSDISPISHESASPLDSEVH     | 287 |
| XP_004208685.1[H.vulgaris]      | STDDTS--SQDVNAATNKEQQLQPRENTDTLGSSENVSSSDISPISHESASPLDSEVH    | 221 |
| XP_032228851.1[N.vectensis]     | TTDSAST-----SPAAS-----KRNKDDG                                 | 262 |
| XP_019628140.1[B.belcheri]      | SSKPAT-----TSSEVSPAQPL----PADSN-                              | 287 |
| XP_014001298.1[S.salar]         | TSSPSIN-----HTNSSSDISPVSNEASASSSPKKG-                         | 280 |
| XP_018081136.1[X.laevius]       | -PSPAVL-----NHHSSSDISPVSNEASASSSPKKEI-                        | 280 |
| XP_001234697.3[G.gallus]        | -SSPAV-----NHHSSSDISPVSNESTSSSPGKEG-                          | 278 |
| 075381[H.sapiens]               | -SSPAV-----NHHSSSDISPVSNESTSSSPGKEG-                          | 280 |
| XP_024109019.1[P.abelii]        | -SSPAV-----NHHSSSDISPVSNESTSSSPGKEG-                          | 280 |
| NP_062755.1[M.musculus]         | -SSPAV-----NHHSSSDISPVSNESTSSSPGKDS-                          | 280 |
| NP_649253.1[D.melanogaster]     | GSSETEVVTKNSDS-SL-----EIM-----                                | 280 |
| XP_003385343.1[A.queenslandica] | ESSTGTTVQQNSNN-----KVNSLQSLTQNGEVGD-                          | 297 |
| XP_032819505.1[P.marinus]       | TLKAEG-----KVNSLQSLTQNGEVGD-                                  | 309 |
| XP_004208685.1[H.vulgaris]      | QITESG---TYNSS-RK-----KASYESEHKSMNGEISSEKKKKTPPEK             | 221 |
| XP_032228851.1[N.vectensis]     | HAAETLDVAQNGPSAQKTVSTSESSEDTSSIVHVSNDLDSGGEEMA--KGQMEVK       | 345 |
| XP_019628140.1[B.belcheri]      | HHSQDQALG---GPDGA-----HGLNGKNGVGLGG-GAT--LPPLDLK              | 305 |
| XP_014001298.1[S.salar]         | HSPEGT-----KGSSHHLLGLTEE-----ESEIDVQ                          | 317 |
| XP_018081136.1[X.laevius]       | HSPEGS-----KVSCHLLSTEEG---N--KAVIDVK                          | 304 |
| XP_001234697.3[G.gallus]        | HSPEGS-----TVTYHLLGPQEE---G--EGVVDVK                          | 306 |
| 075381[H.sapiens]               | HSPEGS-----TVTYHLLGPQEE---G--EGVVDVK                          | 306 |
| XP_024109019.1[P.abelii]        | HSPEGS-----TATYHLLGPQEE---G--EGVLDVK                          | 306 |
| NP_062755.1[M.musculus]         | HSPEGS-----TATYHLLGPQEE---G--EGVLDVK                          | 306 |
| NP_649253.1[D.melanogaster]     | -----DN-----NDEEDDD                                           | 280 |
| XP_003385343.1[A.queenslandica] | -----GFI--HQHOD-----EDEDVI-                                   | 306 |
| XP_032819505.1[P.marinus]       | -----GFI--HQHOD-----EDEDVI-                                   | 323 |
| XP_004208685.1[H.vulgaris]      | KETPPEVVPQEMEH--SHHSNESSDPTNTVKSAITNENLDDAVLDSQDISLQNDTSA     | 221 |
| XP_032228851.1[N.vectensis]     | G--QMEVKGEEVTAENVHQQ--E-----EDNREETVI-                        | 359 |
| XP_019628140.1[B.belcheri]      | DQVRMEVQGEEEKKEEDVKEEKEE-----EEEEEDDVS                        | 373 |
| XP_014001298.1[S.salar]         | TQVRMEVQGEENEDD-----V-----                                    | 322 |
| XP_018081136.1[X.laevius]       | SQVRMEVQGEEEKRENK-RNEEEE-----EDEDDDVS                         | 336 |
| XP_001234697.3[G.gallus]        | GQVRMEVQGEEEKREDK-ED--E-----EDEDDDVS                          | 335 |
| 075381[H.sapiens]               | GQVRMEVQGEEEKREDK-ED--E-----EDEDDDVS                          | 335 |
| XP_024109019.1[P.abelii]        | GQVRMEVQGEEEKREDK-ED--E-----D-DEDDVS                          | 335 |
| NP_062755.1[M.musculus]         | GQVRMEVQGEEEKREDK-ED--E-----D-DEDDVS                          | 334 |

|                                 |                                                    |     |
|---------------------------------|----------------------------------------------------|-----|
| NP_649253.1[D.melanogaster]     | -----                                              | 280 |
| XP_003385343.1[A.queenslandica] | -----                                              | 306 |
| XP_032819505.1[P.marinus]       | -----TEVCVLTKVEAQGENEVD-----                       | 341 |
| XP_004208685.1[H.vulgaris]      | -----                                              | 221 |
| XP_032228851.1[N.vectensis]     | SSLSDMSANASFNEESIAFSSTCIKVPAAASKSEELPSAS-----AIEVD | 404 |
| XP_019628140.1[B.belcheri]      | -----K--EA-----                                    | 376 |
| XP_014001298.1[S.salar]         | -----HVDEEEHLSVPAEDSRGGDGGQNEQVDKLRPPEGASNESEVD    | 392 |
| XP_018081136.1[X.laevis]        | -----VQPEDCIGVQTEDSRGGDGGQNEQVDKLRPPEGASNEMDC-     | 363 |
| XP_001234697.3[G.gallus]        | -----HVDEEECMGVQTEDSRGGDGGQNEQVEKLRPPEGASNENEID    | 378 |
| O75381[H.sapiens]               | -----HVDEEDCLGVQREDSRGGDGGQNEQVEKLRPPEGASNESERD    | 377 |
| XP_024109019.1[P.abelii]        | -----HVDEEDCLGVQREDSRGGDGGQNEQVEKLRPPEGASNESERD    | 377 |
| NP_062755.1[M.musculus]         | -----HVDEEDVLGVQREDSRGGDGGQNEQVEKLRPPEGASNETERD    | 376 |
