# Supplementary material for: An Evolutionary Perspective on the Origin, Conservation and Binding Partner Acquisition of Tankyrases
Source: MDPI journal article supplement (doi:10.3390/biom12111688), 2022-11-15
Supplement: s1 [file s1]

# SOX9

## Homo sapiens:

>NP\_000337.1 transcription factor SOX-9 [Homo sapiens]  
MNLDDPFMKMTDEQEKGLSGAPSPMTSEDSAGSPCPSGSGSDTENTRPPQENTFPKGEFDLKKESEEDKFFVCIREAVSQVLKGYDWTLPMPVVRVNGSSKNKPHVKRPMNAFMVWAQAARRKLADQYPHLHNAELSKTLGKLWRLNNESEKRPFV  
EEAERLRVQHKKHDPYKYQPRRRKSVKNGQAEAEAEATEQTHISPNALFKALQADSPHSSSGMSEVHSPGEHSGSQSQGPPTPTTPTKTDVQPGKADLKREG**RPLQEGGR**QPPIDF**RDVDIGEL**SSDVISNIETFDVNEFDQYLPNGHGPVPATH  
GQVITYTSGYISSTAATPASAGHVWMSKQQAAPPPPPQPPQAPPAQAPPPQQAAPFQQPAAPFQQQAHTLTTLSSEPGSQQRTHIKTEQLSPSHYSEQQHQSFQQIAYSFPNLPHYSPSYPTITRSQYDTDHQNSSSYSHAAGQGTGLYST  
FTYMNPAQRPMYTPADIATSGVPSIPQTHSPQHWEQPVYITQLTRP

## Pongo abelii:

>XP\_009250264.1 transcription factor SOX-9 [Pongo abelii]  
MNLDDPFMKMTDEQEKGLSGAPSPMTSEDSAGSPCPSGSGSDTENTRPPQENTFPKGEFDLKKESEEDKFFVCIREAVSQVLKGYDWTLPMPVVRVNGSSKNKPHVKRPMNAFMVWAQAARRKLADQYPHLHNAELSKTLGKLWRLNNESEKRPFV  
EEAERLRVQHKKHDPYKYQPRRRKSVKNGQAEAEAEATEQTHISPNALFKALQADSPHSSSGMSEVHSPGEHSGSQSQGPPTPTTPTKTDVQPGKADLKREG**RPLQEGGR**QPPIDF**RDVDIGEL**SSDVISNIETFDVNEFDQYLPNGHGPVPATH  
GQVITYTSGYISSTAATPASAGHVWMSKQQAAPPPPPQPPQAPPAQAPPPQQAAPFQQPAAPFQQQAHTLTTLSSEPGSQQRTHIKTEQLSPSHYSEQQHQSFQQIAYSFPNLPHYSPSYPTITRSQYDTDHQNSSSYSHAAGQGTGLYST  
FTYMNPAQRPMYTPADIATSGVPSIPQTHSPQHWEQPVYITQLTRP

## Mus musculus:

>NP\_035578.3 transcription factor SOX-9 [Mus musculus]  
MNLDDPFMKMTDEQEKGLSGAPSPMTSEDSAGSPCPSGSGSDTENTRPPQENTFPKGEFDLKKESEEDKFFVCIREAVSQVLKGYDWTLPMPVVRVNGSSKNKPHVKRPMNAFMVWAQAARRKLADQYPHLHNAELSKTLGKLWRLNNESEKRPFV  
EEAERLRVQHKKHDPYKYQPRRRKSVKNGQAEAEAEATEQTHISPNALFKALQADSPHSSSGMSEVHSPGEHSGSQSQGPPTPTTPTKTDVQAGKVDLKREG**RPLALGGR**QPPIDF**RDVDIGEL**SSDVISNIETFDVNEFDQYLPNGHGPVPATH  
GQVITYTSGYISSTAATPATAGHVWMSKQQAAPPPPPQPPQAPPAQAPPPQQAAPFQQPAAPFQQQAHTLTTLSSEPGSQQRTHIKTEQLSPSHYSEQQHQSFQQIAYSFPNLPHYSPSYPTITRSQYDADHQNSGSYSHAAGQSGSLYSTFT  
YMNPAQRPMYTPADIATSGVPSIPQTHSPQHWEQPVYITQLTRP

## Gallus gallus:

>NP\_989612.1 transcription factor SOX-9 [Gallus gallus]  
MNLDDPFMKMTDEQDKCISDAPSPMTSEDSAGSPCPSGSGSDTENTRPPQENTFPKGDQDLKKESEDEKFFVCIREAVSQVLKGYDWTLPMPVVRVNGSSKNKPHVKRPMNAFMVWAQAARRKLADQYPHLHNAELSKTLGKLWRLNNESEKRPFV  
EEAERLRVQHKKHDPYKYQPRRRKSVKNGQSEQEESGEQTHISPNALFKALQADSPQSSSSISEVHSPGEHSGSQSQGPPTPTTPTKTDAAQPGKQDLKREG**RPLAGGGR**QPPHIDF**RDVDIGEL**SSDVISNIETFDVNEFDQYLPNGHGPVPA  
THGQVITYSGTYGISSSASSPAGAHAWMKQPPQPQPQAPPAQAHTLPALSGEQGPAQQRPHIKTEQLSPSHYSEQQHQSFQQQQQQQQLGYGSFNLQHYSSSYPTITRSQYDYTEHQNSGSYSHAAGQSGGLYSTFTYMNPTQRPMYTP  
ADTSGVPSIPQTHSPQHWEQPVYITQLTRP

## Xenopus laevis:

>NP\_001087942.1 transcription factor Sox-9-B [Xenopus laevis]  
MNLDDPFMKMTDEQDKCLSDAPSPMTSEDSAGSPCPSGSGSDTENTRPPQENTFPKGDQEMKKETDEKFFVCIREAVSQVLKGYDWTLPMPVVRVNGSSKNKPHVKRPMNAFMVWAQAARRKLADQYPHLHNAELSKTLGKLWRLNNESEKRPFV  
EEAERLRVQHKKHDPYKYQPRRRKSVKNGQSEQDDSAEQTHISPNALFKALQADSPHSTSSMSEVHSPGEHSGSQSQGPPTPTTPTKTDVQPGKADLKREG**RPLQESGR**QPPHIDF**RDVDIGEL**SSSEVISTTETFDVNEFDQYLPNGHGPVGSA  
QAPYTGSGYISSTFATSAGGSAMWSKQQQSQQHQSLSTINSEQSQSQQRTHIKTEQLSPSHYSDQQQHQSPQQLNYSFNLQHYSSSYPTITRAQYDYTEHQNSGSYSHAAGQSGGLYSTFTYMNPTQRPMYTPADIATDGVPSIPQTHSPQHW  
EQPVYITQLTRP

## Salmo salar:

>XP\_014034661.1 transcription factor Sox-9-A-like [Salmo salar]  
MNLDDPFMKMTDEQDKCLSDAPSPMTSEDSAGSPCPSGSGSDTENTRPSENGLMGPDGPLVEFKKDDDDKFFVCIRDVAVSQVLKGYDWTLPMPVVRVNGSSKNKPHVKRPMNAFMVWAQAARRKLADQYPHLHNAELSKTLGKLWRLNNEGEKR  
PFVEEAERLRVQHKKHDPYKYQPRRRKSMKNQSESEEDGSEQTHISPGAIFKALQADSPASSIGEVHSPGEHSGSQSQGPPTPTTPTKTDIAGKVDLKREG**RPLQEGTG**RQLNIDF**RDVDIGEL**SSDVISNIDTDFVNEFDQYLPNGHGPAG  
GTAAGQVSYNGTYGISSSAVSQAAGGTAGHSWMTKSSQSQQQHSLTTLGSGEQGNQRTPTTHIKTEQLSPSHYNDQQNSPPQHVTYGSFNLQHYSSSSYPTITRAQYDFDSHQGGTNSYSHAAGQSGGLYSFSSYMSPSQRPMYTPADIATTG  
VPSVPQTHSPQQHWQQPVYITQLSRP

## Petromyzon marinus:

>XP\_032830402.1 transcription factor Sox-9-A [Petromyzon marinus]  
MMSDEQHDKXMSDVSPDMSSENCSSVSPADSLAGSDSDQSCGSKRCSDREDGAGASGLLLAAGGGVLDGGVVFLGLRDAGSGKKMEDDDKFPACIREAVSQVLKGYDWTLPMPVVRVNGSSKSKPHVKRPMNAFMVWAQAARRKLADQYPHLH  
NAELSKTLGKLWRLNNESEKRPFVEEAERLRVQHKKHDPYKYQPRRRKSGKNGQSESDSGEQTHITTAIYKALQADSPADVHSPGEHSGSQSQGPPTPTTPTKTDVQSNKLDIKREG**RPLQEGGR**QQIDFSNVDIRLSREVINSMESFDVN  
EFDQYLPNGHGHGQSVASYGTYGISINGHAWLSKQQQQQQQQQQHTLSSPPPPPFAISSSPQRAHVKTQLSPSHYSDQQQHQSPQQQQQQHQSPQQQQQQQQQQFQAQAQAQQVQQQQQLGGYSPFSIQHYGAAVPAISRQSYADHH  
HHHHHHQSSAAAAHYSGHSAGTAGLYSGFSMGPSRQSPYTPITADIATGVPSIPQTHSPSWEQPVYITQLTRP

## Branchiostoma belcheri:

>XP\_019645392.1 PREDICTED: transcription factor Sox-10-like [Branchiostoma belcheri]  
MSETEPTVEVKEEPAEIELSKREREDTDEESSSSGSEDESGPSDRKRHKFPSPQIREAVSNVLKGYDWTLPMPVVRVNGSSKSKPHVKRPMNAFMVWAQAARRKLADQYPHLHNAELSKTLGKLWRLNNEDEKRPFIEEAERLRVQHKKHDPYKY  
QPRRRKSNKANQSGDEAGSEASPISANTLFLKALQAESPTGSEPHSPEDLKGPSPHDGSVGVTTPSSQAPPTPTTPTKQDQMGTALKADGMRDPTSNLTAIHRDGPHHHHHPQGHGHPNIDFSNVDIGPLDVMSMESFDFVEFDQYLPNGH  
PASASGHHPSHPPTYSYSQMSSAATTTVTSSSSMWAKQNTSPRDNSQEQLRPLVKMEQEHLPPPPPYQTPHPHPASSYNYQPYSSYQHSPPRPQYTDYPPPAHSPQQYFSPHPTSSSIPPPYNYMAPQORSLYPTVAGAPSTWEPYSYQLARP

## Drosophila melanogaster:

>CAB63903.1 Sox100B protein [Drosophila melanogaster]  
MSDSSSSNCTKDRAPVEALVLANYALKAEQKAQGGGRKEDERITTAVMKVLGYDWNVLQASAKAPSRDKKEHIKRPMAFMVWAQAARRVMSKQYPHLQNSELSKSLGKLWKNLKDSDKKPFMEFAEKLRTMTHKQEHDPDYKYQPRRKKARV  
LPSQHSQGDGSGPGEMTLATMGSSSGKPRSSNSNGQRRAGKGNAAADLGSCAATISHANVGSSSDVFSNEAFMKSILNSACAASIMEQSLTLETGLDSCSTASSMSSLTPPATPYNVAPSNAKASAANNPSSLLRLQLEPVANAGDGYGVLLEAG  
REYVAIGEVNYQGSQAGSVGAEGGGAGQEMDFLENINGYGGYTSRVSYPAYSYPANGGHFATEEQQQQALQASEALNYKAAADIDPEKIDQYFMDQMLPMTQHHPHHTHPLHPLHHSPPPLNSASLSACSASSSQQFVAEYIEHGLYS  
PAASSAQNPNGFGQPYANGAASMTPTLGDPAQQLQSQQQEQQHNPQSQHLLWGTYTVYNNP

## Hydra vulgaris:

>XP\_002161752.2 PREDICTED: transcription factor SOX-18-like [Hydra vulgaris]  
MMAAESTNSFATHVIGNNITHAVSQEQKGEQYOSTTISLSAEAAQCLKNLGBEGILCDDALLRLTMSSTSEHGETEFLDTKNSRVKRPMMNSFMWAQTARKKLAEKYPHLHNAHLSKMLGKLWMLSPDEKQPYVLEASRLDKLKHDEHPEYK  
YPRRRPKGLKRGYSTPTTIVISPTTSKPYTIPNSNARIVHAPENENLISRAEAAQIVYATDGMQYIYAVQKSGTPTTMAHHHNGNSVIVSPNTQIPITLVQSTSAPTSNTSYPAYVTVPMPATSTAIFHPAIPVQGVGHTPAFVLRSSYPGNSILSP  
SAIPIAYHNIDHRTIESHMQPNQHIKTESTNTIVTKPDGETIVIIQRPIDGHVVPFQLREVPSGATNTITVVPQSQVIQQHIVQTPNNQETKIL

## Nematostella vectensis:

>XP\_001630037.1 transcription factor SOX-9 [Nematostella vectensis]  
MDKKTVEQQVQAVLGLTDGQSVRNHQLNSAIAVNHVLGDYDWSLILPLVVRNGIKTKPHVKRPMNAFMVWAQAARRKLADQYPHLHNAELSKTLGKLWKLNDSEKKPFIEEAERLRIKHKREHPDYKYQPRRKKQKGNNGDAGDATISA  
DILLKVLKDGSKLVNPNNGDASASCASPESVSDGEVSSSESCVSPETPTAVPVKNEDVKNEDALSAPQGFPSCKSKDDSNSHAIQVQNGSAHLQQNRRRSFSSFAGDKRRDLSLSCPPIKKRALIPVSSPEVLPTSLDDIFPPSPSPSSDSSIPSHQHREDTLP  
LTHFEF  
SSYREFMVQLQKLPSSEGFFPNRVAPSATMQQRNQPDNSFFPFSESEVNVCSLAATRQPAFLSPSPSTSGTSSSSNSGRTHTLWK

## Amphimedon queenslandica:

>NP\_001266245.1 uncharacterized protein LOC100631786 [Amphimedon queenslandica]  
MSAGLDQYTVTLQAGSPSCSSLSPPSYQSNLLDVCVDGTATHVHHNGSGRGGNGGSGAGKKEHIKRPMAFMVWAQLERRKMTTEFFDMHNAEISRRLGKLWRLNLSREKQPYIEESERLRIQHMKQYPDYKYRPRRKKGGKKPKPVNNTSYL  
GGNDSSGEYYPTTPTTSSSSNCSCGAGIRAPVPTCSIAVQCSMELGEHVIEREPPSSPKQTAETISIQVNGSAHLQQNRRRSFSSFAGDKRRDLSLSCPPIKKRALIPVSSPEVLPTSLDDIFPPSPSPSSDSSIPSHQHREDTLP  
LTHFEF  
MDPLMPYDPSAVDLALSGSSALSSSSTAASNVLNLNLTFLPLQSSAATSIFSFPNIDSCSTTFDFPELPSDFADIPAGNASEFDTISITLLST

## Alignment

|                                  |                                                                            |     |
|----------------------------------|----------------------------------------------------------------------------|-----|
| XP_002161752.2[H.vulgaris]       | -----MMAASETNSNFATHVIQNNNITHAVSQEQRKGEGYSTTISLSEAAQCLKN---                 | 51  |
| NP_0012626245.1[A.queenslandica] | -----MSAGDLQYT-----VILQQAPSPSCSSLSPPSSPY-----                              | 30  |
| CAB63903.1[D.melanogaster]       | -----MSDSSSSNCTKDR-----                                                    | 13  |
| XP_001630037.1[N.vectensis]      | -----M-----                                                                | 1   |
| XP_019645392.1[B.belcheri]       | -----MSETETPVEVKEE-----PAEL-----ES--LK--R                                  | 22  |
| XP_032830402.1[P.marinus]        | -----MMSDE-QHD-----KHMSDVPSFPMSENCVSGSPADSLAGSDSDSCGSGSKRCS                | 43  |
| XP_014034661.1[S.salar]          | MNLLDPFLKMTD-EQD-----KCLSDAPSPMSSEDS-AGSPCPSPGSGSDT-----                   | 48  |
| NP_989612.1[G.gallus]            | MNLLDPFMKMTD-EQD-----KCLSDAPSPMTSDEDS-AGSPCPSPGSGSDT-----                  | 43  |
| NP_001087942.1[X.laervis]        | MNLLDPFMKMTD-EQD-----KCLSGAPSPMTSEDS-AGSPCPSPGSGSDT-----                   | 43  |
| NP_000337.1[H.sapiens]           | MNLLDPFMKMTD-EQE-----KGLSGAPSPMTSEDS-AGSPCPSPGSGSDT-----                   | 43  |
| XP_009250264.1[P.abelii]         | MNLLDPFMKMTD-EQE-----KGLSGAPSPMTSEDS-AGSPCPSPGSGSDT-----                   | 43  |
| NP_035578.3[M.musculus]          | MNLLDPFMKMTD-EQE-----KGLSGAPSPMTSEDS-AGSPCPSPGSGSDT-----                   | 43  |
| XP_002161752.2[H.vulgaris]       | -----LG-----E-----EGILCDDA-----LLRL                                        | 66  |
| NP_0012626245.1[A.queenslandica] | -----QSNLLDVCDDGTATHVHH-----                                               | 48  |
| CAB63903.1[D.melanogaster]       | -----AKPVEALVLANYALK-AEQ-----KEAQGQ-----GGRKEDERITTAVMKVLGY                | 57  |
| XP_001630037.1[N.vectensis]      | D-----KKVTEQQVQAVLGLD-----TDGSQVRNHQLSNAIASAVNHVLDGY                       | 43  |
| XP_019645392.1[B.belcheri]       | EREDTDD-----EESSSGSEDDGSGPSDRKRHKFPSPQIREAVSNVLKGY                         | 65  |
| XP_032830402.1[P.marinus]        | DREDGAGASGLLLAGGPGVGLDGGVVFGLGRDAGSGKMKDEDDKFPACIREAVSQVLKGY               | 108 |
| XP_014034661.1[S.salar]          | --ENTRPSENGLLMGPDGP-----LVEFFKKDDDKFPVCIRDAVSQVLKGY                        | 87  |
| NP_989612.1[G.gallus]            | --ENTRPQENTFPKQDP-----DLKKESEDEKFPVCIREAVSQVLKGY                           | 84  |
| NP_001087942.1[X.laervis]        | --ENTRPQENTFPKQDQ-----EMKKEDEDEKFPVCIREAVSQVLKGY                           | 84  |
| NP_000337.1[H.sapiens]           | --ENTRPQENTFPKGEPP-----DLKKESEEDKFPVCIREAVSQVLKGY                          | 84  |
| XP_009250264.1[P.abelii]         | --ENTRPQENTFPKGEPP-----DLKKESEEDKFPVCIREAVSQVLKGY                          | 84  |
| NP_035578.3[M.musculus]          | --ENTRPQENTFPKGEPP-----DLKKESEEDKFPVCIREAVSQVLKGY                          | 84  |
| XP_002161752.2[H.vulgaris]       | TMSSTSEHGTEFLDTKNSRVKRPMSFMVWAQTARKKKLAEKYPHLHNAHLSKMLGKLWK                | 126 |
| NP_0012626245.1[A.queenslandica] | --NGSGRGGNGSGAGKKEHKRPMAFMVWAQLERRKMTTEFPDMHNAEISRRGLKLWR                  | 106 |
| CAB63903.1[D.melanogaster]       | DWNLVQASAKAP--SDRKKKEHKRPMAFMVWAQAARRVMSKQYPHLQNSSELSKGLKWK                | 116 |
| XP_001630037.1[N.vectensis]      | DWSLIPLPVRVNGIKTKQKPHVKRPMAFMVWAQAARRKLADQYPHLHNAELSKTLGKLWK               | 103 |
| XP_019645392.1[B.belcheri]       | DWTLVPMPVRVNGSSSKSPHVKKRPMNAFMVWAQAARRKLADQYPHLHNAELSKTLGKLWR              | 125 |
| XP_032830402.1[P.marinus]        | DWTLVPMPVRVNGSSSKSPHVKKRPMNAFMVWAQAARRKLADQYPHLHNAELSKTLGKLWR              | 168 |
| XP_014034661.1[S.salar]          | DWTLVPMPVRVNGSSSKNKPHVKKRPMNAFMVWAQAARRKLADQYPHLHNAELSKTLGKLWR             | 147 |
| NP_989612.1[G.gallus]            | DWTLVPMPVRVNGSSSKNKPHVKKRPMNAFMVWAQAARRKLADQYPHLHNAELSKTLGKLWR             | 144 |
| NP_001087942.1[X.laervis]        | DWTLVPMPVRVNGSSSKNKPHVKKRPMNAFMVWAQAARRKLADQYPHLHNAELSKTLGKLWR             | 144 |
| NP_000337.1[H.sapiens]           | DWTLVPMPVRVNGSSSKNKPHVKKRPMNAFMVWAQAARRKLADQYPHLHNAELSKTLGKLWR             | 144 |
| XP_009250264.1[P.abelii]         | DWTLVPMPVRVNGSSSKNKPHVKKRPMNAFMVWAQAARRKLADQYPHLHNAELSKTLGKLWR             | 144 |
| NP_035578.3[M.musculus]          | DWTLVPMPVRVNGSSSKNKPHVKKRPMNAFMVWAQAARRKLADQYPHLHNAELSKTLGKLWR             | 144 |
| XP_002161752.2[H.vulgaris]       | MLSPDEKQPVYLEASRLDKLHKDEHPYKYRPRRRPKGLRGYSTPTMIVSPPTTSKPYT                 | 186 |
| NP_0012626245.1[A.queenslandica] | LLSDREKQPPIEESERLRIQHMKQYPDYKYRPRKKGGKKPKPVNNTSYLGGNDGSGEEY-               | 165 |
| CAB63903.1[D.melanogaster]       | NLKDSDKKPFMEFAEKLRMTHKQEHDPDYKYRPRKKKARVLPSQHS-----GDGSGPGPE               | 170 |
| XP_001630037.1[N.vectensis]      | LLNDEKKKPFIEEAERLRIKHKREHPDYKYRPRKKQKGNNGNDA-----GD-----AT                 | 152 |
| XP_019645392.1[B.belcheri]       | MLNDEKRPPIEAAERLRVQHKKDHPDYKYRPRRRKSKNKGQSG-----DEAGSEASP                  | 179 |
| XP_032830402.1[P.marinus]        | LLSENEKRPFVEEAERLRVQHKKDHPDYKYRPRRRSKGNKGQSES-----DSSGEQTH                 | 221 |
| XP_014034661.1[S.salar]          | LLNEGEKRPFVEEAERLRVQHKKDHPDYKYRPRRRSKMKGQSES-----EDGSEQTH                  | 200 |
| NP_989612.1[G.gallus]            | LLNESEKRPFVEEAERLRVQHKKDHPDYKYRPRRRSKVKGQSEQ-----EEGSEQTH                  | 197 |
| NP_001087942.1[X.laervis]        | LLNEGEKRPFVEEAERLRVQHKKDHPDYKYRPRRRSKVKGQSEQ-----DDSAEQTH                  | 197 |
| NP_000337.1[H.sapiens]           | LLNESEKRPFVEEAERLRVQHKKDHPDYKYRPRRRSKVKGQAEA-----EEATEQTH                  | 197 |
| XP_009250264.1[P.abelii]         | LLNESEKRPFVEEAERLRVQHKKDHPDYKYRPRRRSKVKGQAEA-----EEATEQTH                  | 197 |
| NP_035578.3[M.musculus]          | LLNESEKRPFVEEAERLRVQHKKDHPDYKYRPRRRSKVKGQAEA-----EEATEQTH                  | 197 |
| XP_002161752.2[H.vulgaris]       | IPSN-WARIVHA-PENENLISPRAEAAQIVVATDGMQ-----                                 | 221 |
| NP_0012626245.1[A.queenslandica] | -YPT-TM-----PTSSS-NSCSCGAGIRRAPVPTCSIAVQCSMELGEHVIEREPSPK                  | 215 |
| CAB63903.1[D.melanogaster]       | MTLSATMGSSGK-PRSSNSNGQRAGKGNAADLGSCAATIS-----HAN-----                      | 214 |
| XP_001630037.1[N.vectensis]      | ISADDLLKVLKGDGSKLVPNNGDASA-----SCA-----S-----                              | 181 |
| XP_019645392.1[B.belcheri]       | ISANTLFKALQAESPTGSE-----PH-----S-----                                      | 201 |
| XP_032830402.1[P.marinus]        | ITTNAIYKALQADSPS-----                                                      | 237 |
| XP_014034661.1[S.salar]          | ISPGAIFKALQADS-PAS-----SI-----                                             | 220 |
| NP_989612.1[G.gallus]            | ISPNAIFKALQADSPQSSS-----SI-----                                            | 218 |
| NP_001087942.1[X.laervis]        | ISPNAIFKALQADSPHSTS-----SM-----                                            | 218 |
| NP_000337.1[H.sapiens]           | ISPNAIFKALQADSPHSSS-----GM-----                                            | 218 |
| XP_009250264.1[P.abelii]         | ISPNAIFKALQADSPHSSS-----GM-----                                            | 218 |
| NP_035578.3[M.musculus]          | ISPNAIFKALQADSPHSSS-----GM-----                                            | 218 |
| XP_002161752.2[H.vulgaris]       | ---YYAVQKGS-----FTPTMAHHGNS---VIVSPTN---QPI                                | 252 |
| NP_0012626245.1[A.queenslandica] | QTAETISIQVNGSAHLQNNRRSFSSFAGDKRPRDLSLSCPPI-KKRALIP---VSSPPE                | 271 |
| CAB63903.1[D.melanogaster]       | -----VGSSSSDVF-----SNEAFMKSLSNACAASLMESLIETGLDS---PC                       | 254 |
| XP_001630037.1[N.vectensis]      | -----PE-SV-----S-----DGEVSSSES                                             | 195 |
| XP_019645392.1[B.belcheri]       | -----PEDLK-----G-----PSPHDGSVG                                             | 216 |
| XP_032830402.1[P.marinus]        | -----ADVH-----S-----PGEHS---                                               | 247 |
| XP_014034661.1[S.salar]          | -----GEVH-----S-----PGEHS---                                               | 230 |
| NP_989612.1[G.gallus]            | -----SEVH-----S-----PGEHS---                                               | 228 |
| NP_001087942.1[X.laervis]        | -----SEVH-----S-----PGEHS---                                               | 228 |
| NP_000337.1[H.sapiens]           | -----SEVH-----S-----PGEHS---                                               | 228 |
| XP_009250264.1[P.abelii]         | -----SEVH-----S-----PGEHS---                                               | 228 |
| NP_035578.3[M.musculus]          | -----SEVH-----S-----PGEHS---                                               | 228 |
| XP_002161752.2[H.vulgaris]       | TLVQSTSAPTSNYPAYVTVPMPATSTAI FHPITAI PVQGVH-TPAFVLRSSYPG-----              | 304 |
| NP_0012626245.1[A.queenslandica] | VLPTSLDDIFPPSPSSSDSS-----                                                  | 291 |
| CAB63903.1[D.melanogaster]       | STASSMSSLTPPATPYNVAPSNAKA-----SAA-----NNPSLLRLQLSEPVANAGDG                 | 302 |
| XP_001630037.1[N.vectensis]      | C--SVSPSPETPTAVPV-----KNEDVKNDEALSAQ---PGF-----                            | 226 |
| XP_019645392.1[B.belcheri]       | VTPSSQAPPTPTPTPKQDQM---T-----ALKADGMKRDPTSNTL---TAIHRDGP                   | 263 |
| XP_032830402.1[P.marinus]        | --GQSQQPPTPTPTPKTDV-QSNKL-----DLKREG-----                                  | 275 |
| XP_014034661.1[S.salar]          | --GQSQQPPTPTPTPKTDI-QAGKV-----DLKREG-----                                  | 258 |
| NP_989612.1[G.gallus]            | --GQSQQPPTPTPTPKTDAQPGQK-----DLKREG-----                                   | 257 |
| NP_001087942.1[X.laervis]        | --GQSQQPPTPTPTPKTDV-QPKK-----DLKREG-----                                   | 256 |
| NP_000337.1[H.sapiens]           | --GQSQQPPTPTPTPKTDV-QPKA-----DLKREG-----                                   | 256 |
| XP_009250264.1[P.abelii]         | --GQSQQPPTPTPTPKTDV-QPKA-----DLKREG-----                                   | 256 |
| NP_035578.3[M.musculus]          | --GQSQQPPTPTPTPKTDV-QAGKV-----DLKREG-----                                  | 256 |
| XP_002161752.2[H.vulgaris]       | SNILSPS---AIPAIYHNI DHRTIESHMQPNQHIKTESTNTIVKTPDGETIVIIQRPIDG              | 361 |
| NP_0012626245.1[A.queenslandica] | --PISHQHRE-----DT-----LPTLHFEFMDPLMPYDP                                    | 319 |
| CAB63903.1[D.melanogaster]       | YGVVLEAGREY-----VAIGEVNYSQGSAGVQSG-----A-----EGGG                          | 336 |
| XP_001630037.1[N.vectensis]      | --P-SCSKDDSDNSHAIDFDVGDLT-----DLM-A-----MGVDSTEFDQYLPITYSQ                 | 271 |
| XP_019645392.1[B.belcheri]       | HHHHHPQGHGHPNIDFSNVDIGPL-----DVMS-----MESFDVEEFDQYLPNGH                    | 310 |
| XP_032830402.1[P.marinus]        | <b>RPLQEGGRQ</b> Q--IDFSNVDIRELSR-----EVISN-----MESFDVNEFDQYLPNGH          | 321 |
| XP_014034661.1[S.salar]          | <b>RPLQEGTGR</b> QLNIDF <b>RDVDIGEL</b> SS-----DVISH-----IDTFDVNEFDQYLPNGH | 306 |
| NP_989612.1[G.gallus]            | <b>RPLAQEGGR</b> QPHIDF <b>RDVDIGEL</b> SS-----DVISN-----IETFDVNEFDQYLPNGH | 305 |
| NP_001087942.1[X.laervis]        | <b>RPLQESGRQ</b> PHIDF <b>RDVDIGEL</b> SS-----EVISt-----IETFDVNEFDQYLPNGH  | 304 |
| NP_000337.1[H.sapiens]           | <b>RPLPQGRQ</b> PP-IDF <b>RDVDIGEL</b> SS-----DVISN-----IETFDVNEFDQYLPNGH  | 303 |

|                                 |                                                               |     |
|---------------------------------|---------------------------------------------------------------|-----|
| XP_009250264.1[P.abelii]        | -RFLPEGGRRPP-IDFRDVDIGELSS-----DVISN-----IETFDVNEFDQYLPPNGH   | 303 |
| NP_035578.3[M.musculus]         | -RFLAEGGRPP-IDFRDVDIGELSS-----DVISN-----IETFDVNEFDQYLPPNGH    | 303 |
| XP_002161752.2[H.vulgaris]      | HVVFPQLREVP--SGATNTITVVPQ---SQVIQQHIVQTPNNQE-----TKIL----     | 404 |
| NP_001266245.1[A.queenslandica] | SAVDLALSGSS-----SALSSSTAAS--NVLSLNTF-----FLQ-----             | 351 |
| CAB63903.1[D.melanogaster]      | AGQEMDFLENIINGYGGYTGSRVSYPAY--SYFANGGHFATEEQQQQALQASEALNYPKPA | 395 |
| XP_001630037.1[N.vectensis]     | ALLDSLTITKAINT---TQINTQ-----SLSNSRFTTTSQAVQSFPFLPSYREFMVQ-    | 319 |
| XP_019645392.1[B.belcheri]      | PASASGHHSHPPYTSYSQMSSSAT--TVTSSSSWMAKQNTS--PRONSQEQRLPVK-     | 364 |
| XP_032830402.1[P.marinus]       | PGHGQSVAA---SYGGT-----GYSINGHAWLSKQOQQ--QOQQQQQH-----         | 359 |
| XP_014034661.1[S.salar]         | PGAPGTAAGQV--SYNGTYGISSSAVSQAAGGTAGHSWMTKSQSQ-----            | 349 |
| NP_989612.1[G.gallus]           | PGVPATHGQVT--TYSGTYGISSSSASP---AGAGHAMMAKQOQP--PPQPP-----     | 350 |
| NP_001087942.1[X.laervis]       | PGVGS--AQA--PYTGSYGISSTPSAT--TGAGSAMMSKQOQQ--P-----           | 342 |
| NP_000337.1[H.sapiens]          | PGVPATHGQV--TYTGSYGISSTAATP---ASAGHVMSKQOQAP--PPPPQPPQAPPA-   | 355 |
| XP_009250264.1[P.abelii]        | PGVPATHGQV--TYTGSYGISSTAATP---AGAGHVMSKQOQAP--PPPPQPPQAPPA-   | 355 |
| NP_035578.3[M.musculus]         | PGVPATHGQV--TYTGSYGISSTAATP---ATAGHVMSKQOQAP--PPPPQPPQAPQA-   | 355 |
| XP_002161752.2[H.vulgaris]      | -----                                                         | 404 |
| NP_001266245.1[A.queenslandica] | -----                                                         | 351 |
| CAB63903.1[D.melanogaster]      | ADIDPKEDIQYFMDQMLPMTQHHPHHTPLHHLHHSPLNNSASLSS--ACSSASSQQP     | 454 |
| XP_001630037.1[N.vectensis]     | -----LQKLPESEGSFPPNR-----EHLPPPPPPQYTP-----H-----PP           | 335 |
| XP_019645392.1[B.belcheri]      | -----MEQ-----EHLPPPPPPQYTP-----H-----PP                       | 382 |
| XP_032830402.1[P.marinus]       | -----TLSSPPPPPPPAISSPEQRAHVKTQLS                              | 386 |
| XP_014034661.1[S.salar]         | -----QQHSLTTLGSQGGQGNQRTPTTHIKTEQLS                           | 379 |
| NP_989612.1[G.gallus]           | -----A--QPPAQHTLPALSQE--QG--PAQQRPHIKTEQLS                    | 381 |
| NP_001087942.1[X.laervis]       | -----QHSLSSTINSE--QS--QSQRTHIKTEQLS                           | 369 |
| NP_000337.1[H.sapiens]          | -----PQAPPQQAAPPQQAAPP--QQPOAHTLTTLSS--P--GQSQRTHIKTEQLS      | 403 |
| XP_009250264.1[P.abelii]        | -----PQAPPQQAAPPQQAAPP--QQPOAHTLTTLSS--P--GQSQRTHIKTEQLS      | 403 |
| NP_035578.3[M.musculus]         | -----PQAPPQQAAPPQQAAPP--QQQAHTLTTLSS--P--GQSQRTHIKTEQLS       | 401 |
| XP_002161752.2[H.vulgaris]      | -----                                                         | 404 |
| NP_001266245.1[A.queenslandica] | -----SSAATSIFSPFNIDSC                                         | 367 |
| CAB63903.1[D.melanogaster]      | VAEYIEHLGYSPAASS-----ASQNPNGFPQQPYAN                          | 485 |
| XP_001630037.1[N.vectensis]     | PSATMQQ-----RNQPSNSFFPFSESEV                                  | 359 |
| XP_019645392.1[B.belcheri]      | ASSYNYQPQYS-----SYQHSPPRPQYT-----                             | 405 |
| XP_032830402.1[P.marinus]       | PSHYSDQQQQQQQPPQQQHSPPQQQQQQQQQPPQQAQQAQQVQQQQQLGYSFPFSIQHY   | 446 |
| XP_014034661.1[S.salar]         | PSHYNDQQNSS-----PPQHVITYGSFNLQHY                              | 405 |
| NP_989612.1[G.gallus]           | PSHYSEQQHSFPQ-----QQ-----QQQQQLGYGSFNLQHY                     | 413 |
| NP_001087942.1[X.laervis]       | PSHYSDQQQ-----QHSPPQLNYSFNLQHY                                | 395 |
| NP_000337.1[H.sapiens]          | PSHYSEQ-Q-----QHSPPQIAYSFPNLPHY                               | 428 |
| XP_009250264.1[P.abelii]        | PSHYSEQ-Q-----QHSPPQIAYSFPNLPHY                               | 428 |
| NP_035578.3[M.musculus]         | PSHYSEQ-Q-----QHSPPQIAYSFPNLPHY                               | 426 |
| XP_002161752.2[H.vulgaris]      | -----                                                         | 404 |
| NP_001266245.1[A.queenslandica] | STDFDPELPSDFADIFAQNAS-----EFD-----TSITTLTST-----              | 400 |
| CAB63903.1[D.melanogaster]      | GAASMTPTLGDPAPOQE-----LQSQQQEQQHONPSQHHLWGTYTYVNP-----        | 529 |
| XP_001630037.1[N.vectensis]     | NVCSSLAATRQ-----PAFLSS--PSTSGTLSSSSNSGRHT--                   | 394 |
| XP_019645392.1[B.belcheri]      | ---DYPPPAHS-----PQOFYSFH--PTSSSIPPPYNYMAPQRSL                 | 441 |
| XP_032830402.1[P.marinus]       | GAAVVPAISRQYSYADHHHHHHHHQSSAAAAAYSGHSAGTAGLYSGFSYMGFSQRPS     | 506 |
| XP_014034661.1[S.salar]         | SSSSYPSITRAQYDFSDHGG-----TNSYSSHAAGQGQSGLYSFSSYMSFSQRPM       | 456 |
| NP_989612.1[G.gallus]           | GS-SYPPITRSQYDYTEHQNS-----GSYYSHA-AGQSGGLYSTFTYMNFTQRPM       | 461 |
| NP_001087942.1[X.laervis]       | SS-SYPTITRAQYDYTEHQGS-----NSYYTHA-SGQNSGLYNFTYMNFSQRPM        | 443 |
| NP_000337.1[H.sapiens]          | SP-SYPPITRSQYDYTDHQNS-----SSYYSHA-AGQGTGLYSTFTYMNPAQRPM       | 476 |
| XP_009250264.1[P.abelii]        | SP-SYPPITRSQYDYTDHQNS-----SSYYSHA-AGQGTGLYSTFTYMNPAQRPM       | 476 |
| NP_035578.3[M.musculus]         | SP-SYPPITRSQYDYADHQNS-----GSYYSHA-AGQSGGLYSTFTYMNPAQRPM       | 474 |
| XP_002161752.2[H.vulgaris]      | -----                                                         | 404 |
| NP_001266245.1[A.queenslandica] | -----                                                         | 400 |
| CAB63903.1[D.melanogaster]      | -----                                                         | 529 |
| XP_001630037.1[N.vectensis]     | -----LIWK-----                                                | 398 |
| XP_019645392.1[B.belcheri]      | YPTVAGAP-----STWE--PSYTQLARP                                  | 462 |
| XP_032830402.1[P.marinus]       | YTPIDATGVPSIPQPHSPP-SWE-QPVYTQLTRP                            | 539 |
| XP_014034661.1[S.salar]         | YTPIDATTGVPSIPQTHSPQHQHWDQPVYVYQLSRP                          | 491 |
| NP_989612.1[G.gallus]           | YTPIDATSGVPSIPQTHSPQ-HWE-QPVYTQLTRP                           | 494 |
| NP_001087942.1[X.laervis]       | YTPIDATTGVPSIPQTHSPQ-HWE-QPVYTQLTRP                           | 476 |
| NP_000337.1[H.sapiens]          | YTPIDATSGVPSIPQTHSPQ-HWE-QPVYTQLTRP                           | 509 |
| XP_009250264.1[P.abelii]        | YTPIDATSGVPSIPQTHSPQ-HWE-QPVYTQLTRP                           | 509 |
| NP_035578.3[M.musculus]         | YTPIDATSGVPSIPQTHSPQ-HWE-QPVYTQLTRP                           | 507 |
