# Supplementary material for: An Evolutionary Perspective on the Origin, Conservation and Binding Partner Acquisition of Tankyrases
Source: MDPI journal article supplement (doi:10.3390/biom12111688), 2022-11-15
Supplement: s1 [file s1]

# Cytochrome C

## Sequences :

```
>NP_061820.1 cytochrome c [Homo sapiens]
MGDVEKGKKIFIMKCSQCHTVEKGGKHKTGPNLHGLFGRKTGQAPGYSYTAANKNKGIWGEDTLMLEYL
NPKKYIPGTMIFVGIKKKEERADLIAYLKATNE

>NP_001124639.1 cytochrome c [Pongo abelii]
MGDVEKGKKIFIMKCSQCHTVEKGGKHKTGPNLHGLFGRKTGQAPGYSYTAANKNKGIWGEDTLMLEYL
NPKKYIPGTMIFVGIKKKEERADLIAYLKATNE

>NP_031834.1 cytochrome c, somatic [Mus musculus]
MGDVEKGKKIFVQKCAQCHTVEKGGKHKTGPNLHGLFGRKTGQAAGFSYTDANKNKGITWGEDTLMLEYL
NPKKYIPGTMIFAGIKKKSERVDLIAYLKDATSK

>NP_001072946.1 cytochrome c [Gallus gallus]
MGDIEKGKKIFVQKCSQCHTVEKGGKHKTGPNLHGLFGRKTGQAEGFSYTDANKNKGITWGEDTLMLEYL
NPKKYIPGTMIFAGIKKKSERVDLIAYLKDATSK

>NP_001085462.1 cytochrome c, somatic A [Xenopus laevis]
MGDAEKGKKIFIQKCAQCHTVEKTGKHKTGPNLWGLFGRKTGQAAGFSYTDANKSKGIVWGEDTLFEYLE
NPKKYIPGTMIFAGIKKKNERLDLIAYLKSTSE

>XP_014028790.1 cytochrome c [Salmo salar]
MGDIAGKKKAFVQKCAQCHTVEGGKHKVGPNLWGLFGRKTGQAEGYSYTDANKSKGIWETDTLMTYLE
NPKKYIPGTMIFAGIKKKGERADLIAYLKSATS

>XP_032813079.1 cytochrome c, somatic-like [Petromyzon marinus]
MADVEKGKKVVFVQKCSQCHTVEGGKHKTGPNLWGLFGRKTGQAPGYSYTDANKSKGITWEEDTLVYYLE
NPKKYIPGTMIFAGIKKKDERNNLIAYLKSTSD

>XP_019613432.1 PREDICTED: cytochrome c, testis-specific [Branchiostoma belcheri]
MADAVKNGNPEKGKKVVFVQKCAQCHTVEAGGKHKTGPNLNLGLFGRKTGQAAGFSYTDANKNKGITWAEDT
LWIYLENPKKYIPGTMIFAGLKKKGERADLISYLKESTSS

>NP_001285984.1 cytochrome c proximal, isoform B [Drosophila melanogaster]
MGVPAGDVEKGKKLFVQRCAQCHTVEAGGKHKVGPNLHGLIGRKTGQAAGFAYTDANKAKGITWNEDTLF
EYLENPKKYIPGTMIFAGLKKPNERGDLIAYLKSATK

>XP_001635381.1 cytochrome c [Nematostella vectensis]
MGDATKGAQVFKTKAQCHTVEAGGKHKTGPNLHGLFGRKTGQAEGFSYTTANQNKGITWGEDTLMVYLE
NPKKYIPGTMVIFAGIKKKNERLDLIAYLKQETS

>XP_004209990.1 cytochrome c [Hydra vulgaris]
MGAEEKIPTGDATKGAQVFKQCAQCHVIDQSGKHKTGPNLYGLIGRKTGQAAGFSYTTANQNKGITWNKD
TLMWYLENPSKYIPGTMVIFAGIKKKQERADLIAYLEEECKK

>XP_003388937.1 PREDICTED: cytochrome c-like [Amphimedon queenslandica]
MRSFLLQRTLDSVVTEKGVVTGYHCISLKAEKEKALQRRSILQLLGKMSIPQGDPAAGAKIFKQRCACQ
HTTEAGGKHKTGPNLHGLFGRKTGQAAGFTYTTQANKSKGITWGEDTLFVYLEAPKKYIPGTMVIFAGLKK
PQERADLIAHLKEATK
```

Alignment

|                                 |                                                                |     |
|---------------------------------|----------------------------------------------------------------|-----|
| XP_003388937.1[A.queenslandica] | MRSFLQRTLDVVTKEGVVVTGYHCISLKAAEEKEKALQRRSILQLLGKMSIPQGD        | 60  |
| XP_004209990.1[H.vulgaris]      | -----MGAEKIPTGDATKGA                                           | 15  |
| NP_001285984.1[D.melanogaster]  | -----MGVPAGDVEKGG                                              | 12  |
| XP_019613432.1[B.belcheri]      | -----MADAVKNGNPEKGG                                            | 14  |
| XP_001635381.1[N.vectensis]     | -----MGDATKGA                                                  | 8   |
| XP_032813079.1[P.marinus]       | -----MGDVEKGG                                                  | 8   |
| XP_014028790.1[S.salar]         | -----MGDIAKGG                                                  | 8   |
| NP_001085462.1[X.laervis]       | -----MGDAEKGG                                                  | 8   |
| NP_061820.1[H.sapiens]          | -----MGDVEKGG                                                  | 8   |
| NP_001124639.1[P.abelii]        | -----MGDVEKGG                                                  | 8   |
| NP_031834.1[M.musculus]         | -----MGDVEKGG                                                  | 8   |
| NP_001072946.1[G.gallus]        | -----MGDIEKGG                                                  | 8   |
|                                 | ..: :*                                                         |     |
| XP_003388937.1[A.queenslandica] | KIFKQRCACQCHTTEAGGKHKGTGPNLHGLFGRKTGQAPGFTYTQANKSKGITWGEDTLFVY | 120 |
| XP_004209990.1[H.vulgaris]      | KVFQKRCACQCHVIDQSGKHKGTGPNLYGLIGRKTGQAPGFSYTDANKQNGITWNKDTLMVY | 75  |
| NP_001285984.1[D.melanogaster]  | KLFVQRCACQCHTVEAGGKHKVGPNLHGLIGRKTGQAGFAYTDANKKAGITWNEDTLFEY   | 72  |
| XP_019613432.1[B.belcheri]      | KVFVQKCAQCHTVEAGGKHKGTGPNLHGLFGRKTGQAPGFSYTDANKKAGITWAEDTLMIY  | 74  |
| XP_001635381.1[N.vectensis]     | KVFPTKCAQCHTVEAGGKHKGTGPNLHGLFGRKTGQAGGFSYTDANKNGKITWGEDTLMVY  | 68  |
| XP_032813079.1[P.marinus]       | KVFVKCSQCHTVEAGGKHKGTGPNLHGLFGRKTGQAPGFSYTDANKSKGITWEEDTLVYV   | 68  |
| XP_014028790.1[S.salar]         | KAFVQKCAQCHTVENGGKHKVGPNLHGLFGRKTGQAGGFSYTDANKSKGIITWEDTLMTY   | 68  |
| NP_001085462.1[X.laervis]       | KIFIQKCAQCHTVEKTGKHKGTGPNLHGLFGRKTGQAPGFSYTDANKSKGIWGEDTLFEY   | 68  |
| NP_061820.1[H.sapiens]          | KIFIMKCSQCHTVEKGGKHKGTGPNLHGLFGRKTGQAPGFSYTDANKNGKITWGEDTLMEY  | 68  |
| NP_001124639.1[P.abelii]        | KIFIMKCSQCHTVEKGGKHKGTGPNLHGLFGRKTGQAPGFSYTDANKNGKITWGEDTLMEY  | 68  |
| NP_031834.1[M.musculus]         | KIFVOKCAQCHTVEKGGKHKGTGPNLHGLFGRKTGQAGGFSYTDANKNGKITWGEDTLMEY  | 68  |
| NP_001072946.1[G.gallus]        | KIFVOKCSQCHTVEKGGKHKGTGPNLHGLFGRKTGQAGGFSYTDANKNGKITWGEDTLMEY  | 68  |
|                                 | * * :*:***. : ****.*** **;***** *:*** **: *** * *** *          |     |
| XP_003388937.1[A.queenslandica] | LEAPKKYIPGTRMVFAGLKKPQERADLIAHLKEATK-                          | 156 |
| XP_004209990.1[H.vulgaris]      | LENPSKYIPGTRMVFAGIKKKQERADLIALEECECK                           | 112 |
| NP_001285984.1[D.melanogaster]  | LENPKKYIPGTRMVFAGLKKPNERGDLIAYLKSATK-                          | 108 |
| XP_019613432.1[B.belcheri]      | LENPKKYIPGTRMVFAGLKKKGERADLIAYLKESTSS                          | 111 |
| XP_001635381.1[N.vectensis]     | LENPKKYIPGTRMVFAGIKKKNERLDLIAYLKQETSS                          | 104 |
| XP_032813079.1[P.marinus]       | LENPKKYIPGTRMIFAGIKKKDERNNLIAYLKSTSD                           | 105 |
| XP_014028790.1[S.salar]         | LENPKKYIPGTRMIFAGIKKKGERADLIAYLKSTSS-                          | 104 |
| NP_001085462.1[X.laervis]       | LENPKKYIPGTRMIFAGIKKKNERLDLIAYLKSTSE                           | 105 |
| NP_061820.1[H.sapiens]          | LENPKKYIPGTRMIFVGIKKKEERADLIAYLKKATNE                          | 105 |
| NP_001124639.1[P.abelii]        | LENPKKYIPGTRMIFVGIKKKEERADLIAYLKKATNE                          | 105 |
| NP_031834.1[M.musculus]         | LENPKKYIPGTRMIFAGIKKKGERADLIAYLKKATNE                          | 105 |
| NP_001072946.1[G.gallus]        | LENPKKYIPGTRMIFAGIKKKSERVDLIAYLKDATSK                          | 105 |
|                                 | ** *.*****:*.*:** ** :*:*:*. .                                 |     |

## Percent identity matrix:

```
#
#
# Percent Identity Matrix - created by Clustal2.1
#
#
1: XP_003388937.1[A.queenslandica] 100.00 72.97 77.78 73.64 77.88 72.12 73.08 75.96 74.04 74.04 77.88 75.96
2: XP_004209990.1[H.vulgaris] 72.97 100.00 68.52 69.37 77.88 67.62 67.31 69.52 66.67 66.67 70.48 69.52
3: NP_001285984.1[D.melanogaster] 77.78 68.52 100.00 76.85 75.96 76.92 78.85 79.81 76.92 76.92 84.62 81.73
4: XP_019613432.1[B.belcheri] 73.64 69.37 76.85 100.00 80.77 80.95 79.81 80.95 77.14 77.14 83.81 81.90
5: XP_001635381.1[N.vectensis] 77.88 77.88 75.96 80.77 100.00 78.85 78.85 82.69 79.81 79.81 83.65 84.62
6: XP_032813079.1[P.marinus] 72.12 67.62 76.92 80.95 78.85 100.00 83.65 84.76 81.90 81.90 83.81 83.81
7: XP_014028790.1[S.salar] 73.08 67.31 78.85 79.81 78.85 83.65 100.00 82.69 81.73 81.73 85.58 85.58
8: NP_001085462.1[X.laevis] 75.96 69.52 79.81 80.95 82.69 84.76 82.69 100.00 85.71 85.71 88.57 86.67
9: NP_061820.1[H.sapiens] 74.04 66.67 76.92 77.14 79.81 81.90 81.73 85.71 100.00 100.00 91.43 87.62
10: NP_001124639.1[P.abelii] 74.04 66.67 76.92 77.14 79.81 81.90 81.73 85.71 100.00 100.00 91.43 87.62
11: NP_031834.1[M.musculus] 77.88 70.48 84.62 83.81 83.65 83.81 85.58 88.57 91.43 91.43 100.00 92.38
12: NP_001072946.1[G.gallus] 75.96 69.52 81.73 81.90 84.62 83.81 85.58 86.67 87.62 87.62 92.38 100.00
```
