# Supplementary material for: An Evolutionary Perspective on the Origin, Conservation and Binding Partner Acquisition of Tankyrases
Source: MDPI journal article supplement (doi:10.3390/biom12111688), 2022-11-15
Supplement: s1 [file s1]

# PARP16

## Sequences :

>NP\_001303872.1 protein mono-ADP-ribosyltransferase PARP16 isoform 2 [Homo sapiens]  
MQPFGWAAAREAAAGRDMLAADLRCSLFASALQSYKRDSVLRPFPPSYARGDCKDFEALLADASKLPNLKE  
LLQSSGDNHKKRAWDLVSWILSSKVLTIHSAGKAEFEKIQKLTGAPHTFVPAPDFLFEIEYFDPANAKFYE  
TKGERDLIYAFHGSRLNFHFSIIHNGLHCHLNKTSLFEGEGTYLTSDLSLALIYSPHGHGWQHSLLGPILS  
CVAVCEVIDHPDVKQCQTKKKDSKEIDRRRARIKHSEGGDIPPKYFVVTNNQLLRVKYLLVYSQKPPKRAS  
SQLSWFSSSHWFTVMISLYLLLLLIVSVINSSAFQHFWNRRAK

>XP\_009248197.1 mono [ADP-ribose] polymerase PARP16 isoform X2 [Pongo abelii]  
MQPFGWAAAREAAAGRDMLAADLRCSLFASALQSYKRDSVLRPFPPSYARGDCKDFEALLADASKLPNLKE  
LLQSSGDNHKKRAWDLVSWILSSKVLTIHSAGKAEFEKIQKLTGAPHTFVPAPDFLFEIEYFDPANAKFYE  
TKGERDLIYAFHGSRLNFHFSIIHNGLHCHLNKTSLFEGEGTYLTSDLSLALIYSPHGHGWQHSLLGPILS  
CVAVCEVIDHPDVKQCQTKKKDSKEIDRRRARIKHSEGGDIPPKYFVVTNNQLLRVKYLLVYSQKPPKRAS  
SQLSWFSSSHWFTIMISLYLLLLLIVSVINSSAFQHFWNRRAK

>AAH55447.1 Poly (ADP-ribose) polymerase family, member 16 [Mus musculus]  
MQLSNRAAAAREASRDVLAADLRCSLFASALQSYKRDSVLRPFPPSYARHDCDKDFEALLADTGRLPNLKE  
LLQSSRDTRQAWDLVSWILSSKILTIHSAKKAEFEKIQQLTGAPHTFVPPTDFLFEIEYFDPANSRFYE  
TKGERDLIYAFHGSRLNFHFSIIHNGLHCHLNKTSLFEGEGTYLTSDLSLALIYSPHGHGWQHSLLGPILS  
CVAVCEVIDHPDVKQCQTKKKDSKEIDRRRARIKHSEGGDIPPKYFVVTNNQLLRVKYLLVYSQKPPKRAS  
SQLSWLSSHWFMIMSLYLLLLLIVSVTNSSAFHHFWNRVRAK

>XP\_015147741.1 protein mono-ADP-ribosyltransferase PARP16 isoform X2 [Gallus gallus]  
MGPPRLGEAVREAVRPDLGAELRCSLFAAALQSYKRDSVLRPFPPSYRGGAADASKDFEALLADTEALPG  
LKELLGAAPSABERTWDLLSWILSPKTTFTIQSIKKQEYEKIQELTGMSGAAVPAPDFLFEVTVCDQMNAK  
FAGTRGEQDLIYAFHGSRLNFHFSIIHNGLHCHLNKTSLFEGEGTYLTSDLSLALIYSPHGLGWQRSTLGS  
ILSCVAVCEIIDHPDVKQCQVKKKDSSEIDRKRARARNSEGGDVQKYFVVTNNQLLQVKYLLVYSQKQHR  
RPSGQSSWFSTRFAITMMLYLLLLLMVIGASNSAFLYYWHRMFYSEG

>XP\_018108776.1 protein mono-ADP-ribosyltransferase PARP16 [Xenopus laevis]  
MVEEIIITRDLISADLKCSLFAAALKSYKRDSVLRPFPPALYTSQYKDFDALITDSSALPGLPEI IQDKNN  
RDQKLVNLLRWILSKDLFTVKSVPKDYEEIQALPGSPSHALPTPDFLFELEYCEKLSAKFQETRGRDRL  
IYAFHGSRLNFHFSIIHNGLHCHLNKTSLFEGEGTYLTSDLGLALLYSPHGGQWTRSMGLGPVLSVAMCEM  
IDHPDVKCAQKKKDSSEIDRKRARARNSEGGDVQKYFVVTNNQLLRVKYLMVYSQEQPRRRPRQPTWFS  
KHRFAIMTLYLFIILIGLSSSKAFTYHWNRLLGWRP

>XP\_045544515.1 protein mono-ADP-ribosyltransferase PARP16-like isoform X2 [Salmo salar]  
MQPFLPDPAVRELVCCLHRDPAADLRCSLFAAQNWKYKRDSVLRPPYPRYIRDRDTKEFDLLSDVSS  
LFGVRELVRLRGEGADHHLALTHWVLSSKSPAVKTLQKDEYAKLCNLTSEGISSTVPDFLFELEYCDQM  
NAKFEKTRAGRDLFYAFHGSRLNFHFSIIHNGLHCHLNKTSLFEGEGTYLTSDLMAVLVSPHGNGWDRSL  
LGPLLS CVAVCEVIDHPDVKQVKRKDSEITDRQSRARNSEGGVEPKYFVVTNNQLLRVKYLLVYSQR  
RHLSRHSGRGSWLVRHFAIMMSLYLLLLLIVIGAFNSTTFLSFWNRLFR

>XP\_032804273.1 protein mono-ADP-ribosyltransferase PARP16 isoform X2 [Petromyzon marinus]  
MLAEAEARGWEPAHQAAEEGGGGGEGGGDHEDGRGVPRPGDAVREALRGDPGAADLRSLVAAALLG  
YRHSLLRPFPSGYPNGGEDGKDFLTALLADMSAVPSVQQLREDVDVAPRIELLEHWALTSKHFTVCSQR  
KDEFKLEALTGSPGVVPAPDFVFSVTYSETAERRFREMRGELDILYAYHGSRLNFHFSIIHNGLHCHL  
NKLTALFEGEGTYLTSDLSLALLYSPHSQAWRLSALGAALSCVAVCEVIDHPDVKQVKRKDADGLDRRAR  
ARHSEGGDVQKYFVVTNNQLLRVRYLLLYARKSQHHSIPWQRSWLGHRFAVGMAVYGLILLLLGALNS  
PTVLHYWRRYLSGD

>XP\_019627055.1 PREDICTED: mono [ADP-ribose] polymerase PARP16-like isoform X2 [Branchiostoma belcheri]  
MTEDVRYNVRKLEGDVLAADLQLSLFAAALLSYRHDTVLRPFPPGFARQNDKDFPALKSVVMKGLSGVK  
ELLQDSRVTSDAQTLQLVHWVLETRNFHLRSCEPAEYKEVQRLTGYSNTNIPPPSHMFEVVHSESTDARF  
EETRQDRSLFYAFHGSRLDNFHSIIHNGLHAHLNKNLSLFEGEGTYLSGDLGVSI IYSHKGQGWDRSMLGET  
MSCVAVCEVIDMPKVVKSYKEENGRAKNKDKHEVPEKYIYVSNELLRVKIVLVYAEKARFRVQAPSF  
FQRHKFFILMTLYVIVLAVIGAANSFNLQYYLRKFFR

>XP\_032233915.1 protein mono-ADP-ribosyltransferase PARP16 [Nematostella vectensis]  
MDDSEVEKETQLERIVGKLRSDGFPACDLRMCLFVAALSYRHDSILRPYPYPVGLREDGSKNIQKLTNLS  
IPSLSALNDSCLPVGWMLLDWVLLKKFPDVKTLDKSMFQIEKKTGHSYSNSTEPDYIFEIQYHENNAL  
NARFALSEECEVL IYAYHGSRLNFHFSIIHNGLHSHLNKNSLFEGEGTYLSSDLNVSIMYSTYQAWNSG  
LGEKLS CVAVCEVLNHPDVKCSLEDPRAATSSPERRRSGSGASSVRARAKGEGGDVDRYYVQNNQLL  
RVKYLIVYAEKRPQRTQRTPPGTWFARLLIYIIGLVLLGSRTRAFHKLASYLQKEDTHL

>XP\_002164087.1 protein mono-ADP-ribosyltransferase PARP16 [Hydra vulgaris]  
MTSISEQVSIILSNDLLAAELKALFTSALNSYRHDSCLRPPFNIFGDTCDKNIAVKQMSLLSEFRPLA  
EMVNIISLMSEDCQKMIHWALDSKIYSSKTCNKHVDDVQKKTGCSYQVQPDYIFEIKYNTFSSQKFD  
LAKMYGVKYGFHGSMDNFHFSIYNVNLQVHMVKNVFGEGVYLSDDLVSMPYIISSGFTWQHSKLGQQIS  
CVAVCEVLDPGVKCTMKTVNGANRSRANSEAGEVPKYFVVTSSDLRVVKYIFVFTDKTEKRNSAKCG  
MLCFRYPVLSIMLAYMLLLAFVSIWNSKTFQLIWRNRYWYKKKF

>XP\_019855808.1 PREDICTED: mono [ADP-ribose] polymerase PARP16-like [Amphimedon queenslandica]  
MSKDDGDGASTGTQLKVNELREALSKDMAGCDCLLSLFWALSYYRHDTVLRYPYNPQFILSNQDKDIDG  
LRSVPKTLPGINEVQQLDSDDDRVTITLYDICTCKTGRFLSFKPGDKFLSIESQTSVPAHKVQPYCFEL  
QYSSEREKQRTASEYGTFLAYHGSRMENFHSIIHNGLLSHMKNVIGFEGTYLTSDLSCVMFNPSAT  
SWTKSSLPCLSMMAVCEVVSHPDIRSRVQHGGEPSINQKVPERYFVVTNDEMLRVKYLIVFAQERGRPS  
PTRRWFNSNHKVMVMFVLYLFLLLFLGLWNSRYVSRLYNQYTRRYITL

## Alignment

|                                 |                                                               |                              |     |
|---------------------------------|---------------------------------------------------------------|------------------------------|-----|
| XP_019855808.1[A.queenslandica] | -----MSKDDGGDASTG-----                                        | TLQLKVNELREALSKDMAGCDCL      | 35  |
| XP_002164087.1[H.vulgaris]      | -----                                                         | MTSISEQVSIILSNDLLAAELK       | 22  |
| XP_032233915.1[N.vectensis]     | -----                                                         | MDDSVKEETQLERVIGKLRSDGFCADLR | 28  |
| XP_019627055.1[B.belcheri]      | -----                                                         | MTEDVRTNVREKLEGDVLAADLQ      | 23  |
| XP_032804273.1[P.marinus]       | MLAEAEARGWEPANQAAEEEGGGGGGGEDDHEDGDRVGPGRGDAVREALGDPGAADLR    |                              | 60  |
| XP_045544515.1[S.salar]         | -----                                                         | MQPFLFPDAVRELVCSLRHDPVADLR   | 28  |
| XP_018108776.1[X.laervis]       | -----                                                         | ---MVEEIIITROLLSADLK         | 16  |
| XP_015147741.1[G.gallus]        | -----                                                         | MGFPRLGGEAVREAVRDPPLGAELR    | 24  |
| AAH55447.1[M.musculus]          | -----                                                         | MQLSNRAAAAREAASRDVLAADLR     | 23  |
| NP_001303872.1[H.sapiens]       | -----                                                         | MQPSGWAAAREAAGRDLAADLR       | 23  |
| XP_009248197.1[P.abelii]        | -----                                                         | MQPSGWAAAREAAGRDLAADLR       | 23  |
|                                 |                                                               | * ..:                        |     |
| XP_019855808.1[A.queenslandica] | LSLFWALSYYRHDTVLRPPYPNQFILSN-GDKDIDGLRSVFKTLFGLNEVVQQLD-SLDD  |                              | 93  |
| XP_002164087.1[H.vulgaris]      | LALFTSALNSYRHDSCLRPPFNIFGDTCKNIADVQMKSLSEFRPLAEMVNIIS-LMSE    |                              | 81  |
| XP_032233915.1[N.vectensis]     | MCLFVAALLESYRHDSILRPPYPVGLRED-GSKNIQKLTNLSSSIPSLALNNDSC--LEP  |                              | 85  |
| XP_019627055.1[B.belcheri]      | LSLFAAALLSYRHDTVLRPPFPFGFARQN-DEKDFALKSVMKLSGVKELLQDSRVTSDA   |                              | 82  |
| XP_032804273.1[P.marinus]       | LSLFAAALLGYRRHSLRPPFPGYNGGDEGKDFTALLADMSAVPSVQQLREDV-DVAP     |                              | 119 |
| XP_045544515.1[S.salar]         | CSLFWAAANQYKRDSVLRPPYPPIYIRDR-DTKEFDELLSDVSSLPGVRELVRLRP-GEAD |                              | 86  |
| XP_018108776.1[X.laervis]       | CSLFWAALKSYKRDSVLRPPFPALYTSDQ--YKDFDALITDSSALPGLPEI IQDN-NRDQ |                              | 73  |
| XP_015147741.1[G.gallus]        | CSLFAAALKSYRRDSVLRPPFSRYGGADAASKDFEALLADTEALPGLKELLGAAP-SAE   |                              | 83  |
| AAH55447.1[M.musculus]          | CSLFSALQSYKRDSVLRPPFPASYARHD--CKDFEALLADTGRPLNKLKELLQSSR-DTDK |                              | 80  |
| NP_001303872.1[H.sapiens]       | CSLFSALQSYKRDSVLRPPFPASYARGD--CKDFEALLADASKPLNKLKELLQSSG-DNHK |                              | 80  |
| XP_009248197.1[P.abelii]        | CSLFSALQSYKRDSVLRPPFPSSYARGD--CKDFEALLADASKPLNKLKELLQSSG-DNHK |                              | 80  |
|                                 | .*.*.*.:.*.:***.*                                             | : : : *                      |     |
| XP_019855808.1[A.queenslandica] | RVITLLYDIICTGFRLSFKPGDKFSLIESQTSVPAHKV-OPYCFPELQYSSE--REEKW   |                              | 150 |
| XP_002164087.1[H.vulgaris]      | DCQKMIHWALDSKIYSSKTCNKHVFDDVQKKTGCCSSYQV-OPDYIFEIKYNTF--SSQKF |                              | 138 |
| XP_032233915.1[N.vectensis]     | GVMSLLDWLL--KKFDVKTLDKSMFQEIIEKKTGHSSYNSTEDPYIFEIQYHENNALNARF |                              | 144 |
| XP_019627055.1[B.belcheri]      | QTLQLVHWVLETRNFHLRSCPEAEYKEVQRLTGYTSTNIPPPSHMFVSVHSES--TDARF  |                              | 140 |
| XP_032804273.1[P.marinus]       | RILELLHWALTYSKHFTVCSQRKDEFSKIEALTGSPGVPVPAPDFVFSVTYSET--AERRF |                              | 177 |
| XP_045544515.1[S.salar]         | HHLALTHWLSSSKSFAVKTLQKDEYAKLNLTESEGISTVPDPDLFELEYCDQ--MNAKF   |                              | 144 |
| XP_018108776.1[X.laervis]       | KVLNLLRWILSSDKLFTVKSVPKDKYEEIQALPGSPSHALTPDFLFELEYCEK--LSAKF  |                              | 131 |
| XP_015147741.1[G.gallus]        | RTWDLWSILSPKTTFTIQSIKKQYEEKIQELTGMSGAAPAPDFLFEVITYCDQ--MNAKF  |                              | 141 |
| AAH55447.1[M.musculus]          | QAWDLVSWILSSKILTIHSAKKAEFEKIQQLTGAPHTVPVTPDFLFEIYFDP--ANSRF   |                              | 138 |
| NP_001303872.1[H.sapiens]       | RAWDLVSWILSSKVLTIHSAGKAEFEKIQKLTGAPHTVPVAPDFLFEIYFDP--ANAKF   |                              | 138 |
| XP_009248197.1[P.abelii]        | RAWDLVSWILSSKVLTIHSAGKAEFEKIQKLTGAPHTVPVAPDFLFEIYFDP--ANAKF   |                              | 138 |
|                                 | : : : : *                                                     | .*.: : . :                   |     |
| XP_019855808.1[A.queenslandica] | QRTASEGYFTFLAYHGSRMENFHSIAHNGLLSHMKNVGIFGEGTYLTDLSVCMNFPSPSAT |                              | 210 |
| XP_002164087.1[H.vulgaris]      | DDLAKMIGVKYGFHSGSRMDNFHSIVNGLQVHMVQNAVPEGVYLSDDLSPMPYISSGF    |                              | 198 |
| XP_032233915.1[N.vectensis]     | LALSECEVLYAYHGSRLENFHSILHNLGHSLHAKNSLFGEGTYLSDSLNVSIMYSTYSQ   |                              | 204 |
| XP_019627055.1[B.belcheri]      | EETQRDSRLFYAFHGSRILDNFHSILHNLGHSLHAKNSLFGEGTYLSDSLNVSIIYSHKQ  |                              | 200 |
| XP_032804273.1[P.marinus]       | REMRGELDILYAYHGSRLENFHSILHNLGHSLHAKNSLFGEGTYLTDLSLALLYSPHSQ   |                              | 237 |
| XP_045544515.1[S.salar]         | EKTRAGRDLFYAFHGSRLENFHSILHNLGHSLHAKNSLFGEGTYLTDLSMAVLYSPHGN   |                              | 204 |
| XP_018108776.1[X.laervis]       | QETRGRDRDLFYAFHGSRLENFHSILHNLGHSLHAKNSLFGEGTYLTDLSLALLYSPHGO  |                              | 191 |
| XP_015147741.1[G.gallus]        | AETRGECDLIFYAFHGSRLENFHSILHNLGHSLHAKNSLFGEGTYLTDLSLALLYSPHGL  |                              | 201 |
| AAH55447.1[M.musculus]          | YETKGERDLIFYAFHGSRLENFHSILHNLGHSLHAKNSLFGEGTYLTDLSLALIYSPHGH  |                              | 198 |
| NP_001303872.1[H.sapiens]       | YETKGERDLIFYAFHGSRLENFHSILHNLGHSLHAKNSLFGEGTYLTDLSLALIYSPHGH  |                              | 198 |
| XP_009248197.1[P.abelii]        | YETKGERDLIFYAFHGSRLENFHSILHNLGHSLHAKNSLFGEGTYLTDLSLALIYSPHGH  |                              | 198 |
|                                 | .:****.:****.*** *: : .:****.*: **.: : .                      |                              |     |
| XP_019855808.1[A.queenslandica] | SWTKSSLPPLCSMMMAVCEVSHPDIRSRVQHGG-----                        | EPSIN                        | 248 |
| XP_002164087.1[H.vulgaris]      | TWQHSKLQQQISCVAVCEVLDPHGPKCTMTVN-----                         | GANRSRANNSEA                 | 243 |
| XP_032233915.1[N.vectensis]     | AWSNSGLGEKLSCVAVCEVLNHPDVKCSLEDPRATSSPERRRSGSGASSVRARAKGSEG   |                              | 264 |
| XP_019627055.1[B.belcheri]      | GWDRSMLGETMSCVAVCEVIMDPKYVK-----                              | SKVEEENGRAKNKDK              | 242 |
| XP_032804273.1[P.marinus]       | AWRLSALGAALSCVAVCEVIDHPDVKKQVKRKD-----                        | ADGLDRRRRARARHSEG            | 286 |
| XP_045544515.1[S.salar]         | GWKRSLLGPLLSCVAVCEVIDHPDVKKQVKRKD-----                        | SETIDRRRARARHSEG             | 253 |
| XP_018108776.1[X.laervis]       | GWTRSMLGPVLSCVAVCEVIDHPDVKKQAKKKD-----                        | SSEIDRRRARARHSEG             | 240 |
| XP_015147741.1[G.gallus]        | GWQRSTLGSILSCVAVCEVIDHPDVKKQVKKKD-----                        | SSEIDRRRARARHSEG             | 250 |
| AAH55447.1[M.musculus]          | GWQHSLLGPLLSCVAVCEVIDHPDVKKQVKKKD-----                        | SKEIDRRRARIKHSEG             | 247 |
| NP_001303872.1[H.sapiens]       | GWQHSLLGPLLSCVAVCEVIDHPDVKKQVKKKD-----                        | SKEIDRRRARIKHSEG             | 247 |
| XP_009248197.1[P.abelii]        | GWQHSLLGPLLSCVAVCEVIDHPDVKKQVKKKD-----                        | SKEIDRRRARIKHSEG             | 247 |
|                                 | * * * * *:***.: *                                             | . .                          |     |
| XP_019855808.1[A.queenslandica] | QKVPERYFVVNTDEMLRVKYLIVFAQERGR--PSPTRRWFSNHKWMVFLYLFLLLFLG    |                              | 306 |
| XP_002164087.1[H.vulgaris]      | GEVPKKYFVVNTSSDLRVKYLIVFTDKTEKRNSAKCGMLCFRYPVLSIMLAYMLLAFVS   |                              | 303 |
| XP_032233915.1[N.vectensis]     | GDVPDRYVYVQNNQLLRVKYLLVYAEKRPQRNTQRTQ---PGTWFAILLIIYIIGLVLLG  |                              | 321 |
| XP_019627055.1[B.belcheri]      | HEVPKERYIVSNNELLRVKYLIVYAEKAR-PRVQAPSFFQRHKFFILMTLYVIVLAVIG   |                              | 301 |
| XP_032804273.1[P.marinus]       | GDVPQKYFVVNTNQLLRVKYLLLYARKSQHHSIPWQRSWLGRHRFAVGMVYGLILLLLG   |                              | 346 |
| XP_045544515.1[S.salar]         | GEVPQKYFVVNTNQLLRVKYLLVYSQRRHLSRHSRGSWLVRRHFAMMSLYLILLLIVIG   |                              | 313 |
| XP_018108776.1[X.laervis]       | GDVPQKYFVVNTNQLLRVKYLLVYSQEQPR-RPRQPTWFSKHRFAIMMTLYFILILIG    |                              | 299 |
| XP_015147741.1[G.gallus]        | GDVPQKYFVVNTNQLLQVKYLLVYSQKQHR-RPSGQSSWFSTHRFAIMMTLYLILLMVG   |                              | 309 |
| AAH55447.1[M.musculus]          | GEIPPKYFVVNTNQLLRVKYLLVYSQKQPK-RASSQLSWLSSHMFVIMMSLYLILLLIVS  |                              | 306 |
| NP_001303872.1[H.sapiens]       | GDIPPKYFVVNTNQLLRVKYLLVYSQKPPK-RASSQLSWFSSHMTVMISLYLILLLIVS   |                              | 306 |
| XP_009248197.1[P.abelii]        | GDIPPKYFVVNTNQLLRVKYLLVYSQKPPK-RASSQLSWFSSHMTVMISLYLILLLIVS   |                              | 306 |
|                                 | ..*.*.*.:****.*.: : : *                                       | .*.: *                       |     |
| XP_019855808.1[A.queenslandica] | LWNSRYVSRLYNQYTRYITL                                          |                              | 327 |
| XP_002164087.1[H.vulgaris]      | INNSKTFQLIWRNYWYKKKF-                                         |                              | 323 |
| XP_032233915.1[N.vectensis]     | LSRTRAFHKLASYLQKEDTHL                                         |                              | 342 |
| XP_019627055.1[B.belcheri]      | AANSFNLQYYLRKFFR----                                          |                              | 317 |
| XP_032804273.1[P.marinus]       | ALNSPTVLHYWRKRLSGD----                                        |                              | 364 |
| XP_045544515.1[S.salar]         | AFNSTTFLSFWNRFLR----                                          |                              | 329 |
| XP_018108776.1[X.laervis]       | LSSSKAFTYHWNRLGWRP----                                        |                              | 318 |
| XP_015147741.1[G.gallus]        | ASNSAPFLYVYHMRMFYSEG----                                      |                              | 328 |
| AAH55447.1[M.musculus]          | VTNSSAFPHFWNRVKR----                                          |                              | 322 |
| NP_001303872.1[H.sapiens]       | VINSSAFQHFWRNAKR----                                          |                              | 322 |
| XP_009248197.1[P.abelii]        | VINSSAFQHFWRNAKR----                                          |                              | 322 |
|                                 | : :                                                           |                              |     |

## Percent identity matrix:

```
#
#
# Percent Identity Matrix - created by Clustal2.1
#
#
1: XP_019855808.1[A.queenslandica] 100.00 31.95 35.48 36.51 34.88 37.74 39.34 37.06 38.19 38.51 38.19
2: XP_002164087.1[H.vulgaris] 31.95 100.00 37.22 34.41 34.27 36.79 35.46 36.14 38.29 38.29 38.29
3: XP_032233915.1[N.vectensis] 35.48 37.22 100.00 41.80 44.79 42.90 46.01 42.86 42.27 42.90 43.22
4: XP_019627055.1[B.belcheri] 36.51 34.41 41.80 100.00 43.35 45.89 47.73 46.52 46.35 44.44 44.13
5: XP_032804273.1[P.marinus] 34.88 34.27 44.79 43.35 100.00 54.71 55.21 59.94 55.90 57.14 56.83
6: XP_045544515.1[S.salar] 37.74 36.79 42.90 45.89 54.71 100.00 62.22 62.96 60.25 59.63 59.63
7: XP_018108776.1[X.laevis] 39.34 35.46 46.01 47.73 55.21 62.22 100.00 66.35 62.86 62.86 62.54
8: XP_015147741.1[G.gallus] 37.06 36.14 42.86 46.52 59.94 62.96 66.35 100.00 68.63 69.25 69.57
9: AAH55447.1[M.musculus] 38.19 38.29 42.27 46.35 55.90 60.25 62.86 68.63 100.00 90.68 90.06
10: NP_001303872.1[H.sapiens] 38.51 38.29 42.90 44.44 57.14 59.63 62.86 69.25 90.68 100.00 98.76
11: XP_009248197.1[P.abelii] 38.19 38.29 43.22 44.13 56.83 59.63 62.54 69.57 90.06 98.76 100.00
```
