# Supplementary material for: An Evolutionary Perspective on the Origin, Conservation and Binding Partner Acquisition of Tankyrases
Source: MDPI journal article supplement (doi:10.3390/biom12111688), 2022-11-15
Supplement: s1 [file s1]

# MERIT40

## Homo sapiens:

```
>sp|Q9NWV8|BAB1_HUMAN BRISC and BRCA1-A complex member 1 OS=Homo sapiens OX=9606 GN=BAB1 PE=1 SV=1
MEVAEPSSPTEEEEEEHSAEPRPT[SNPECA]DRAVGAQASVGS[SEGECH]ASADD
GSLNTSGAGPKSWQVPPEPEVQIRTPRVNCPKVIICLDLSEMSLPKLESFNGSKTNA
LNVSQKMIEMFVRTKHKIDKSHEFALVVNDDTAWLSGLTSDPRELCSCLYDLETASCST
FNLEGLFSLIQQKTELPTENVQTI PPPYVVVRTILVYSRPPCQPQFSLTEPMKKMFQCPY
FFFDVVYIHNGTEEEKSEMSWKDMFAFMGSLDTKGTSYKYEVALAGPALELHNCMAKLLA
HPLQRPCQSHASYSLLEEDEAEIEVEATV
```

## Pongo abelii:

```
>NP_001126315.1 BRISC and BRCA1-A complex member 1 [Pongo abelii]
MEVPEPSSPTEEEEEEHSAEPRPT[SNPECA]DRAVGAQASVGS[SEGECH]ASADDGSPNTSGAGP
KSNQVPPPAPEVQIRTPRVNCPKVIICLDLSEMSLPKLESFNGSKTNALNVSQKMIEMFVRTKHKIDK
SHEFALVVNDDTAWLSGLTSDPRELCSCLYDLETASCSTFNLEGLFSLIQQKTELPTENVQTI PPPYV
VRTILVYSRPPCQPQFSLTEPMKKMFQCPYFFFDVVYIHNGTEEEKSEMSWKDMFAFMGSLDTKGTSYKY
EVALAGPALELHNCMAKLLAHPLQRPCQSHASYSLLEEDEATEVEATV
```

## Mus musculus:

```
>NP_080912.2 BRISC and BRCA1-A complex member 1 [Mus musculus]
MEVAEANSPTEEEEEEGEETISEPRPT[SNPECA]DRALGAQASVGS[SEGECH]ATADGGAASVP
GAGPKPQVPPASASEVQIRTPRVNCPKVIICLDLSEMSVPKLESFNGSRTNALNVSQKVMEMFVRTKH
KIDKSHEFALVVNDDSAWLSGLTSDPRELCSCLYDLETASCSTFNLEGLFSLIQQKTELPTENVQTI PP
PPYVVVRTILVYSRPPCQPQFSLTEPMKKMFQCPYFFFDIVYIHNGTEEEKEDMSWKDMFAFMGSLDTKGA
SYKYEVALAGPALELHNCMAKLLAHPLQRPCQTHASYSLLEEDEEAGEEATV
```

## Gallus gallus:

```
>XP_015155591.1 BRISC and BRCA1-A complex member 1 isoform X3 [Gallus gallus]
MERSCGMDTSGPGSAEEEEKAPQRPRPT[SNPECA]DRALSAQSSVGN[SEGECH]ASSEDS PQGTAA
PDGTAWFGPAHPPPEVQVKTFRVNCPEKVIICLDLAEEMALPKLESFNGSKTNALNLSQKMIEMFVRTKH
KIDKSHEFALVVNDATWLSGFTSDPREVCSCLYDLETNVCKSFNLGLENLIQQKTELPTVDNVQTI PP
PPYVVVRTILVLGRPCQCPQFSVSEGMKKMLQCPYFFFDVVYIHNGAEKEDETSWKELYAFFGSLDTKGT
NRYREVTLTGPALELHNCMAKLLAHPLQRPCQSHAAYSLLGEDPEVEATV
```

## Xenopus laevis:

```
>NP_001086385.1 BRISC and BRCA1-A complex member 1 [Xenopus laevis]
MDNSTETFSMDTSEPLEEGEQTHERPHT[SNPECA]DRGVVHQAGVGS[SEGECH]AQVEDPLPTTTT
VPNTSTPPPTLEFQLKTPRVNCPKVIICLDLSEEMSTQKLESFNGSKANALNVSQKMIEMFVRTKHKID
KRHEFALVVANNEAMWLSGFTSDPREVCSCLYDLETNVCESNLEGLFNLIQQRTEFFVTDNVQTI PPPY
VVRILLYSRPASQPALALTDMNKKMQCPYFFFDIVYIHNGSEEEELCWKIDFGFFSSLDSKGTSYKYE
VSTITGPALELHNCMARLLAHPLQRPCQSHAAYSLLEEEESEPEVTV
```

## Salmo salar:

```
>XP_013979057.1 PREDICTED: BRISC and BRCA1-A complex member 1 [Salmo salar]
MEYTPQPGPADGEERSVELRPRPT[SNPECA]DRRSSTGSLGNSNPSTPQPAVGS[SEGECH]STSDSPFSS
TTTTVSATTAQTVAPIVAATVNAIVGLPTPTPVAKDRPKPTQAPPFLTPTTPIPTAEFQLRAIPRVNCPK
VIICLDLSEEMSSQKLESFNGSKTNALNLSQKMIEMFVRTKHKIDKRHEFALVVNDALWLSGFTSDPRE
LCSCLYDLDTNVCEFNLEDLLSVIRQKIDLPLMDNIQTIPPPFVVRTLLYSRHAGQLQFSPSDAVNSM
LLSPYFFFDVVYILHNGAEQGEASWRDITYTSCNLDKSGTCYHEVSVLCGPAIELHNCMAKLLSHPLQR
PFQSHASYSLLEGDDPQDVEATV
```

## Petromyzon marinus:

No homolog found.

## Branchiostoma belcheri:

```
>XP_019620522.1 PREDICTED: BRISC and BRCA1-A complex member 1-like [Branchiostoma belcheri]
MSSTASTTEESVLPDPTTVSESARSESDEVVSTQEEEEKEEEKKDPPRDETPHTENEELNSLASTVSSS
QDSQSSDGTIHVLLPKVNCPEKIVVCLDMSKEMTSRHVSRDGSQFSPLSLAKRVIEIFVRTKSRMDRK
HQFALVILHDAPTLMLESELLSPHLFLDALYVHQPPADDNQSIETFNAICDLDRKCLSYVVEVATNVNMTF
HNHMAKLLAHPLQRPQSDTYTKLQSNBEVS
```

## Drosophila melanogaster:

No homolog found.

## Hydra vulgaris:

No homolog found.

## Nematostella vectensis:

```
>XP_032232271.1 BRISC and BRCA1-A complex member 1 isoform X1 [Nematostella vectensis]
MSKQLPETDLIDLSDDKDADSQRSSPVILTKPHKNHNTGKGRKGEKVKQEKSGKGHESPSHSIGDSL
NSNDSPDRRLVFWNVCQEKIILCLDSLNMNEKSFPSKKAPDFTAYQFVRKAAKIFVNNKAMLINSIHEF
GVITLADDAWYQQFESNPDICTLLDLHLPSEEDNQDTFDMCKLFQTCQRIALPEVEDPALPPPVVIR
VIMYGRSCHPPHFTDRSQMLRELLQSPYFFFDVLVHVELPSENNQCEAIYDSFCLEDEDELDGYMLEVS
RSTSRFLDHMAILLAHPLQRPKQRTFYELQNRDDNETT
```

## Amphimedon queenslandica:

```
>XP_019851282.1 PREDICTED: BRISC and BRCA1-A complex member 1-like [Amphimedon queenslandica]
MADNTISVSSSISNASVLSFDNAQDIHPSCPEKIVFCIDVSEDVSIITTVKSKDRGDLPLFTVWKNALTQF
VFNKSMGMKHEFALMILTDKANMFCDFSSDPLVSDALTSLENVQEYDSFDTSSIFSAIYENCPPPSVC
VGSSMSPPPFTVVRVILYGRSHCLPVYRGESEAHSELMASPHFFLDLVLYSHDPTGHTNVQCYSIFDILSEI
YKPKPALVLDSANLVKLYNFFAKLLAHPLQRPVQSMMDNRLISQVT
```

## Alignment

|                                 |                                                                      |     |
|---------------------------------|----------------------------------------------------------------------|-----|
| XP_013979057.1[S.salar]         | -----METPQGPADGEERSVELRPRT <b>RSNPEGAED</b> RRSSSTGSLGNSNPS          | 45  |
| NP_001086385.1[X.laevis]        | -----MDNSTEETFS-MDTSEPLEEGEQTHEQRPHTR <b>RSNPEGAED</b> RGVV-----     | 43  |
| XP_015155591.1[G.gallus]        | MERSCGMDTSGPG-----SAAEEEEKKAPEQRPRTR <b>RSNPEGAED</b> RALS-----      | 43  |
| NP_080912.2[M.musculus]         | -----MEVAEANSPTEEEEEEEEGEETISEPRPHTR <b>RSNPEGAED</b> RALG-----      | 44  |
| Q9NWV8[H.sapiens]               | -----MEVAEPSSPTEEEEEE-----EEHSAEPRPRTR <b>RSNPEGAED</b> RAVG-----    | 40  |
| NP_001126315.1[P.abelii]        | -----MEVPEPSSPTEEEEEE-----EEHSAEPRPRTR <b>RSNPEGAED</b> RAVG-----    | 40  |
| XP_019851282.1[A.queenslandica] | -----MSSTAS-----TTEESVLPDPTTVSESA-----R-S-ESDEVVSTQE--               | 35  |
| XP_019620522.1[B.belcheri]      | -----MS-----KQLPETDLIDLSDDKDADSQ-RSSPVILTKHPN                        | 34  |
| XP_032232271.1[N.vectensis]     |                                                                      |     |
| XP_013979057.1[S.salar]         | TPQPAVGS <b>SVSGSGG</b> STSDSPSPSTTTTTSATTAQTVAPIVAATVNAIVGLPTPTPAVK | 105 |
| NP_001086385.1[X.laevis]        | -HQAGVGS <b>SESEGE</b> AQVEDPLPTTTT-----                             | 70  |
| XP_015155591.1[G.gallus]        | -AQSSVGN <b>SESEGE</b> ASSEDSFGQTAA-----                             | 70  |
| NP_080912.2[M.musculus]         | -AQASVGS <b>SESEGE</b> ATADGGAASVFG-----                             | 71  |
| Q9NWV8[H.sapiens]               | -AQASVGS <b>SESEGE</b> ASADGSLNTSG-----                              | 67  |
| NP_001126315.1[P.abelii]        | -AQASVGS <b>SESEGE</b> ASADGSPNTSG-----                              | 67  |
| XP_019851282.1[A.queenslandica] | -----M-----ADN-----                                                  | 4   |
| XP_019620522.1[B.belcheri]      | -----EEEEEEKKDPPRDETPHTENE-ELNSL-----AST-----                        | 66  |
| XP_032232271.1[N.vectensis]     | KHNTGKGRKGEEKVQ-EKSGKGGHESPS-----HS-----                             | 63  |
| XP_013979057.1[S.salar]         | DRPKPTQAPPPLTPPIPTTAEQFLRAPRVNCEPKVIIICLDLSEEMSSQKLESFNGSKTNA        | 165 |
| NP_001086385.1[X.laevis]        | -----VPTNSTPPTLEFQLKTRPRVNCPEKVIIICLDLSEEMSTQKLESFNGSKANA            | 121 |
| XP_015155591.1[G.gallus]        | -----PDGTAMPGBAHPPEVQVKTTRPVNCEPKVIIICLDLAEEMALPKLESFNGSKTNA         | 124 |
| NP_080912.2[M.musculus]         | -----AGPKPQVVPAS-ASEVQIRTPRVNCEPKVIIICLDLSEEMSVPKLESFNGSKTNA         | 124 |
| Q9NWV8[H.sapiens]               | -----AGPKSQWVPPP-APEVQIRTPRVNCEPKVIIICLDLSEEMSLPKLESFNGSKTNA         | 120 |
| NP_001126315.1[P.abelii]        | -----AGPKSQWVPPP-APEVQIRTPRVNCEPKVIIICLDLSEEMSLPKLESFNGSKTNA         | 120 |
| XP_019851282.1[A.queenslandica] | -----ISVSSSISNASVLSFDENAQDIHPSCEPKIVFCIDVSEDVSIITTVKSKDRGDLPL        | 59  |
| XP_019620522.1[B.belcheri]      | -----VSSSQDSQDSSDGTIHVLLPKVNCPEKIVVCLDMSKEMTSRHVSSRDGSQLFSP          | 119 |
| XP_032232271.1[N.vectensis]     | -----IGDSLSLNSNDSNDPRFLVPWNQCQEKIILCLDLSEMEMNEKSFPSKAPDFTA           | 116 |
|                                 | . * * * : : . * : : : : . * *                                        |     |
| XP_013979057.1[S.salar]         | LNISQKMIEMFVRTKHKIDKRHEFALVVVNDLAWLSGFTSDPRELCSCLYDLDTN---V          | 222 |
| NP_001086385.1[X.laevis]        | LNSSQKMIEMFVRTKHKIDKRHEFALVVANNEAMWLSGFTSDPREVCSCLYDLETN---V         | 178 |
| XP_015155591.1[G.gallus]        | LNISQKMIEMFVRTKHKIDKSHEFALVVVNDATWLSGFTSDPREVCSCLYDLETN---V          | 181 |
| NP_080912.2[M.musculus]         | LNVSQKMIEMFVRTKHKIDKSHEFALVVVNDASAWLSGLTSDPRELCSCLYDLETA---S         | 181 |
| Q9NWV8[H.sapiens]               | LNVSQKMIEMFVRTKHKIDKSHEFALVVVNDTAWLSGLTSDPRELCSCLYDLETA---S          | 177 |
| NP_001126315.1[P.abelii]        | LNVSQKMIEMFVRTKHKIDKSHEFALVVVNDTAWLSGLTSDPRELCSCLYDLETA---S          | 177 |
| XP_019851282.1[A.queenslandica] | FTVWKNALTQFVFNKSMGM-KHEFALMILTDKANWCFDSSDPQLVSDALTSLENVQ-EK          | 117 |
| XP_019620522.1[B.belcheri]      | LSLAKRVIEIFVRTKSRMRDKHQFALVILH-----                                  | 149 |
| XP_032232271.1[N.vectensis]     | YQFVRKAAKIFVNNKAMLNSIHEFGVITLADATWYQQFESNPDMCITLLDHLNPSEEDN          | 176 |
|                                 | : : * * . * : : * * : : :                                            |     |
| XP_013979057.1[S.salar]         | CETFNLEDLLSVIRQKIDLPLM-DNIQTIPPPFPVVVTRLLIYSRHAGQLQFSPS--DAVNS       | 279 |
| NP_001086385.1[X.laevis]        | CESFNLEGLFNLIQORTEFPVT-DNVQTIPPPYPVVRIILIYSRSPASQPALAT--DNMKK        | 235 |
| XP_015155591.1[G.gallus]        | CKSFNLDGLFNLIQOKTELPVT-DNVQTIPPPYPVVRIILVLRPGCQPFQFSVS--EQMKK        | 238 |
| NP_080912.2[M.musculus]         | CSTFNLEGLFSLIQOKTELPVT-ENVQTIPPPYPVVRIILVYSRPFCQPFQFSLT--EPMKK       | 238 |
| Q9NWV8[H.sapiens]               | CSTFNLEGLFSLIQOKTELPVT-ENVQTIPPPYPVVRIILVYSRPFCQPFQFSLT--EPMKK       | 234 |
| NP_001126315.1[P.abelii]        | CSTFNLEGLFSLIQOKTELPVT-ENVQTIPPPYPVVRIILVYSRPFCQPFQFSLT--EPMKK       | 234 |
| XP_019851282.1[A.queenslandica] | YDSFDTSSIFSIAIYENCPPPSVCVGSMSPPFFIVRVIIILYGRSHCLPVYRGES-EAHSE        | 176 |
| XP_019620522.1[B.belcheri]      | -----DAPTLMLESE-----                                                 | 158 |
| XP_032232271.1[N.vectensis]     | QDTFDMELFQETICQRIALPE--VEDPALPPYPVIRVIMYGRSHCPPHFTDRSRQMLRE          | 234 |
|                                 | .                                                                    |     |
| XP_013979057.1[S.salar]         | MLLSPYFFFDVYVYLNHGAEEQGDEASWRDIYFSFCNLDSKGTGYHFEVSLCGPAIELHNC        | 339 |
| NP_001086385.1[X.laevis]        | MLQCPYFFFDVYVYIHNHGSSE--EELCWKDIFFGSSLDSKGTGYKYEVSITGPAIELHNC        | 293 |
| XP_015155591.1[G.gallus]        | MLQCPYFFFDVYVYIHNHGAEEKEDETSWKELYAFFGSLDTKGTNYRYEVLITGPAVELHNC       | 298 |
| NP_080912.2[M.musculus]         | MFQCPYFFFDVYVYIHNHTEEEKEDMSWKDMFAFMGSLDTKGASYKYEVALAGPAIELHNC        | 298 |
| Q9NWV8[H.sapiens]               | MFQCPYFFFDVYVYIHNHTEEEKEDMSWKDMFAFMGSLDTKGTGYKYEVALAGPAIELHNC        | 294 |
| NP_001126315.1[P.abelii]        | MFQCPYFFFDVYVYIHNHTEEEKEDMSWKDMFAFMGSLDTKGTGYKYEVALAGPAIELHNC        | 294 |
| XP_019851282.1[A.queenslandica] | LMASPHFLDLVLYSHDEPTG---HNVCQSIFDILSEIYPKPKALVLDWSA--NLVKLYNF         | 213 |
| XP_019620522.1[B.belcheri]      | LLLSPHFLDALVYHQPPAD---DNQSTIEIFNAICLDLRKCLSYVEYVAT--NVTMFHHH         | 231 |
| XP_032232271.1[N.vectensis]     | LLQSPYFFFDVYVYHELPSSE---NNQCEAIYDSFCELDEDEGYMLEVSR--STSRFLDH         | 289 |
|                                 | : : . * : : * * : : : : . * : : :                                    |     |
| XP_013979057.1[S.salar]         | MAKLLSHPLQRPFPQSHASYSLLLEGDDPDQDVEATV-                               | 373 |
| NP_001086385.1[X.laevis]        | MAKLLAHLQRPFPQSHAAYSLLLEEEESPESEVTV-                                 | 328 |
| XP_015155591.1[G.gallus]        | MAKLLAHLQRPFPQSHAAYSLLLEGDEPPEVEATV-                                 | 332 |
| NP_080912.2[M.musculus]         | MAKLLAHLQRPQCPQSHASYSLLLEDEEAGEEATV-                                 | 333 |
| Q9NWV8[H.sapiens]               | MAKLLAHLQRPQCPQSHASYSLLLEDEEAIEVEATV-                                | 329 |
| NP_001126315.1[P.abelii]        | MAKLLAHLQRPQCPQSHASYSLLLEDEEAIEVEATV-                                | 329 |
| XP_019851282.1[A.queenslandica] | FAKLLAHLQRPVQSMMDNRLISQKT-----                                       | 257 |
| XP_019620522.1[B.belcheri]      | MAKLLAHLQRPQASDITYKQLQSNEEVS-----                                    | 241 |
| XP_032232271.1[N.vectensis]     | MAILLAHLQRPKQRDTFYELQNRDDNETT-----                                   | 319 |
|                                 | : * * : * * * * * . * . .                                            |     |
