# Supplementary material for: An Evolutionary Perspective on the Origin, Conservation and Binding Partner Acquisition of Tankyrases
Source: MDPI journal article supplement (doi:10.3390/biom12111688), 2022-11-15
Supplement: s1 [file s1]

# Axin1

## Homo sapiens:

>NP\_003493.1 axin-1 isoform a [Homo sapiens]  
MNITQEQGFPDLDGASFTEDAP**RPFPVPGEE**GELVSTDPRPASYSFCSGKGVGIKETSTATPRRSDLLDGYEPEGSASPTPPYLKWAESLHSLDDQDGISLFRTFLKQEGCADLLDFWFACTGFRKLEPCDSNEEKRLKLARAIYRKYILDNNGI  
VSRQIKPATKSF1KGCIMQKLLIDPAMFDQAQTEIQATMEENTYPSFLKSDIYLEYTRTGESPKVCSDDSSGSGTGKGISGLYPLTNEDEEWKCDQDMEDDGRDAAPGRLPKQLLLETAAPRVSSRRYSEGREFRYGSWREPVNPYYVNAGY  
ALAPATSANDESQQSLSSDADTSLTSDSVGDIPPYIRKQHRREMQUESVQVNGRVPLPHIPRTYRVPKVEVRVEPQKFAEELIHRLEAVQRTREAEKELEERLKRVRMEEEGEDGDPSSGPPGCHKLPPAPAWHHFFPRCVDMGACGLRDAHEE  
NPESILDEHVQRVRLTTPGRQSPGPGGHRSPDSGHVAKMPVALGGAASGHGKHVPKSGAKLDAAGLHHHRHHVHHVHHSTARPKEQVEAEATRAAQSSFAWGLEPHSHGARSRGYSESVGAAPNASDGLAHSKGVGVACKRNAKKAESGKSASTEVP  
GASEDAEKNQKIQMWIIEGEKEISRHRRTGHGSSGTRKPKPHENSRLPSLEHPWAGPQLRTSVQPSHLFIQDPTMPHPAPNPLTLQLEEARRRLEEEKRAAPSKQRYVQEVMRGRACVRPACAPVLHVPAVSDMELSETETRSQRKVGGS  
SAQPCDSIVVAYYFCGEPPIPYRTLVRGRAVTLGQFKELLTKKGSYRYFFKKVSDDEFDCGVVFEEVREDAVLVFEEKIIGKVEKVD

## Pongo abelii:

>Xp\_024089076.1 axin-1 isoform X1 [Pongo abelii]  
MNITQEQGFPDLDGASFTEDAP**RPFPVPGEE**GELVSTDPRPASYSFCSGKGVGIKETSTATPRRSDLLDGYEPEGSASPTPPYLKWAESLHSLDDQDGISLFRTFLKQEGCADLLDFWFACTGFRKLEPCDSNEEKRLKLARAIYRKYILDNNGI  
VSRQIKPATKSF1KGCIMQKLLIDPAMFDQAQTEIQATMEENTYPSFLKSDIYLEYTRTGESPKVCSDDSSGSGTGKGISGLYPLTNEDEEWKCDQDMEDDGRDAAPGRLPKQLLLETAAPRVSSRRYSEGREFRYGSWREPVNPYYVNAGY  
ALAPATSANDESQQSLSSDADTSLTSDSVGDIPPYIRKQHRREMQUESVQVNGRVPLPHIPRTYRVPKVEVRVEPQKFAEELIHRLEAVQRTREAEKELEERLKRVRMEEEGEDGDPSSGPPGCHKLPPAPAWHHFFPRCVDMGACGLRDAHEE  
NPESILDEHVQRVRLTTPGRQSPGPGGHRSPDSGHVAKMPVALGGAASGHGKHVPKSGVKLDAAGLHHHRHHVHHVHHSTGRPKQVEAEATRAAQSSFAWGPPEPHSHGAKSRGYSESVGAAPNASDGLAHSKGAGVACKRNAKKAESGKSASTEVP  
GASEDVEKNQKIQMWIIEGEKEISRHRRTGHGSSGTRKPKPHENSRLPSLERPGAHVHPWAGPQLRTSVQPSHLFIQDPTMPHPAPNPLTLQLEEARRRLEEEKRAAPSKQRYVQEVMRGRACVRPACAPVLHVPAVSDMELSETETRSQR  
KVGSGSAQPCDSIVVAYYFCGEPPIPYRTLVRGRAVTLGQFKELLTKKGSYRYFFKKVSDDEFDCGVVFEEVREDAVLVFEEKIIGKVEKVD

## Mus musculus:

>EDL22489.1 axin 1, isoform CRA a [Mus musculus]  
MQSPKMNVDQGGFPDLDGASFTEDAP**RPFPVPGEE**GELVSTDPRPASYSFCSGKGTISKSETSTATPRRSDLLDGYEPEGSASPTPPYLKWAESLHSLDDQDGISLFRTFLKQEGCADLLDFWFACTGFRKLEPCDSNEEKRLKLARAIYRKYILDNNGI  
DSNGIVSRQIKPATKSF1KDCVMKQIIDPAMFDQAQTEIQSTMEENTYPSFLKSDIYLEYTRTGESPKVCSDDSSGSGTGKGISGLYPLTNEDEEWKCDQDADEDDGRDPLPPSRLTQKLLLETAAPRAPSSRRYSEGRELRYGSWREPVNPYY  
VNSGYALAPATSANDESQQSLSSDADTSLTSDSVGDIPPYIRKQHRREMQUESIQVNGRVPLPHIPRTYRMKPKEIRVEPQKFAEELIHRLEAVQRTREAEKELEERLKRVRMVCYSCSDSTAVSPQEEEGEDGEMPSGPMAHKLPSVPAWHH  
FFPRPVYDMGSGSLRDAHEENPESILDEHVQRVRLTTPGQSPGPGGHRSPDSGHVAKTAVLGGTASGHGKHVPKLGKLDAGLHHHRHHVHHVHHNSARPKEQMEAEVARRVQSSFSWGPTEHTGHAKPRSYSENAGTTLTLAGDLAFGKGTSAPSKR  
NTKKAESGKNANAEVPSTTEDAEKNQKIQMWIIEGEKEISRHRKAGHGSSGLRQQAHESSRPLSIERPGAHVHPWVAQLRNVVQPSHLFIQDPTMPNPNPAPNPLTLQLEEARRRLEEEKRAANKLPKQRYVQAVMQRGRTCVRPACAPVLSVVP  
AVSDLELSETETRSQRKAGGGSAPPCCDSIVVAYYFCGEPPIPYRTLVRGRAVTLGQFKELLTKKGSYRYFFKKVSDDEFDCGVVFEEVREDAVLVFEEKIIGKVEKVD

## Gallus gallus:

>NP\_990275.1 axin-1 [Gallus gallus]  
MNITQEQGFPDLDGASFTEDAP**RPFPVPGEE**GELVSTDPRPVSHGFYSKSDAVRNETSTATPRRSDLLDGYEPEGSASPTPPYLKWAESLHSLDDQDGINLFRNFLQQENCVDLLDFWFACTGFRKLEPCVSNEEKRLKLAKAIYKKYILDNNGI  
VSRQIKPATKSF1KDCVMKQIIDPAMFDQAQTEIQCIEMDNTYPLFKSDIYLEYTRTGESPKVYSDPSSGSGTGKGLGYPLTNEDEEWKCDQDTEPAASRDSAPSSRLTQKLLLETAAPRATSTRYSEGREFRHSGWREPVNPYYNTGY  
AMAPATSANDESQQSMSSDADTMSLTSDSVGDIPPYIRLKRQHRREMQUESAKANGRVPLPHIPRTYRMPKDIHVDPEKFAEELINRLEAGVLRDREAQRLEERLKRVRRAEEEGDDADISTSTSPSHRLPPGGHQPQHNPNRPYSDI  
EENPESILDEHVQRVRLTTPGQSPGPGGHRSPKPRSPSESHGLKLSGTLGTIPPGHKHTTKSGMKLDAANLYHHKHVYHHIHHHSMMPKEQIEAEATQRVQNSFAMNVDSHNYATKSNNYSENLQMAVPMDSLGYSKGKALSCKRNKIKTKTDSG  
KSDGANVYEMPFGSPEDVERNQKIQMWIIEGEKEISRHKKTNHGSSGVKKQLSHDMVRPLSIERPVAVHHVWVAQLRNVVQPSHFFIQDPTMPNPNPAPNPLTLQLEEARRRLEEEKRAKGLPLKQLRKLQKPKRPGSGASQPCENIVVAYYFCGEPPIY  
RTLVRGRVTLGQFKELLTKKGNRYRYFFKKVSDDEFDCGVVFEEVREDDTLPIFEEKIIGKVEKID

## Xenopus laevis:

>NP\_001089251.1 axin 1 S homeolog [Xenopus laevis]  
MSVKAKGFPDLDGGSFTEDAP**RPFPVPGEE**GELITTDQRPFSHTYYSLKNDGIKNETSTATPRRPDLLDGYEPEGSASPTPPYLKWAESLHSLDDQDGINLFRNFLQQENCVDLLDFWFACTGFRKLEPNDSKVEKRLKLAKAIYKKYVLDNNGI  
VSRQIKPATKSF1KDCVLQIQIDAMFDQAQTEIQMMEDNTYPVFLKSDIYLEYTTIGESPKNYSDQSSGSGTGKGSGLYPLTNEDEEWKCDQGEQERESVSPSSLFSQKLLDSSSHCAGSNRRLSDGREFRPGTWREPVNPYYNTGYSG  
APVTSANDESQQSMSSDADTMSLTSDSVGDIPPYLRKRYHRREMQUESANANGRGPLPHIPRTYTMPKDIHVDPEKFAEELINRLEAGVLRDREAQRLEERLKRVRRAEEEGDDGDVSSGSPVISHKLPSGPMHHNYSRYSDSGCVMQIRDAHEE  
NPESILDEHVQRVRLTTPGQSPGTGRHSPKPRSPDGHLKSKTLPGLSGLTMTQTHGKHSSKSGKVDSNLHHHKHVYHHLHHHGKVPKEQIEAEVTQRVQNTYPNWNAESHNYATKSRYNAESMGMAPNPMDSLAYSGKVSMLSKRNAKKADVGS  
ESASVEYVPAPEDAERHQKIQMWIMEGEKEISRHKSNHSSSSAKKQPPPELSRPLSIERPGAHVHPWVAQLRNVVQPSHFFIQDPTMPNPNPAPNPLTLQLEEARRRLEEEKRAAKMPKQRYVQEVIGRQRCVSRPAYIPLLNVPVAVSDMDLS  
EAELEKPKQKTVSSPQPCENIVVAYYFCGEPPIPYRTVMKGRVTLGQFKELLTKKGNRYRYFFKKVSDDEFDCGVVFEEVREDDMLPIFEEKIIGKVEKID

## Salmo salar:

>Xp\_014059686.1 PREDICTED: axin-1-like isoform X1 [Salmo salar]  
MDAIVNSGVKGVKQCYLVLDGGSFTEDAP**RPFPVPGEE**GELVSSDPRPYGHOFYSFKSEILKNEASTATPRRPDLLDGYEPEGSASPTPPYLKWAESLHSLDDQDGILHFLRTFLKQEECADVLDWFPACTGFRKLEANEQGQEEKKLKLAKAIYK  
YILDNNGIYSDQIKPATKSF1KDCVMKRLIDPAMFDQAQTEIQTMEEINTYPLFKSDIYLEYTRTGESPKVYSDQCSVSGGKVLGYPLTNEDEEWKCDHLEEEQGESDPTPSNRKLQKLLQETASQRTVSTKRFQDSHEYKRVRLWQEPIN  
PYYVNTGYAMAPATSANDESQQSMSSASDVTLSLTSDSVGDIPPYKQRKQHRREMHESAKANANGRVPLPHIPRTNRIPKDHIVEPEKFAADLISRLGEVQREAREQKELEERLKRVRLEEEGEDADISTSTSPSHRLPPGGHQPQHNPNRPYSDI  
GYSGLARLPDAHEENPESILDDHVQRVRLTTPGQSPGTGRHSPKPRSPDGFGPGKVPKGMPPTTGPGKHPARLKGGEAEASHQYHHKHVHHIHHHPAGGPKPEQVEADAAMRVNNGNFWHGTQHNHYGSKSRNYADGTCGSPMDPMGYSKSGKSTLS  
KRSFKKAEVARTFEVVPVTEDEVNQKIQMWIMEGEAVNRKKSYPGSGTTGSKTTPSSHEVSRSPSVERPGAHVHPWVAQLRNVVQPSHFFIQDPTMPNPNPAPNPLTLQLEEARRRLEEEKKKTGTTLQTKQRYVMVEVIGRGAARAPALFPPLSVVP  
AVSDTELSEEHVKTKKPACENITVAYYFCGEPPIPYRTSVKGRVMVLGQFKELLTKKGSYRYFFKKVSDNDFDCGVVFEEVREDDAILPIFEEKIIGKVEKID

## Petromyzon marinus:

>XP\_032816874.1 axin-1-like [Petromyzon marinus]  
MSVSEKLRQLRDLDSHIIENAITR**RPFPVPGRE**GKVNVMVPEHCNDPGLARANGVKGGSGDGFVGRMMQPRRM  
DGDLDGYEPEGSASPTPPYVRWAESELPALLEDDQDGTSLFRAFLQEDEDVCDLLDFWFACTGFRKTDGDKRAK  
LAKAIYKKFIKDNAGIVRLQIGISITRTGVKECIASKRIDSTMFDRAQEEVQTEAMENAYPAFLRSDVYLA  
YARSGGSESPRCFADPLPAGFPMAMKGLDSPGLQTVKEDEVLSYDSQQTHKRWPEVHCGRMPTGGSSCFSV  
ASPRAVGRMPSEKGGKGYRNPFLWPGNVPNPYHMNSGYGRAFPASSANDSEQSLSSDAMTDMDTMSMTDSSVD  
GIPPYRLRSCASARDTRQSAKDSGRTEVVHIIPTRSRLPKDMVVEPAKFASELSIRLERLQREDAQEAL EE  
RLRRVRAEEEGEGFPVATATCQASTTQVAAGCGGGGQMAAVPVFSFLSEPEDDDPESILDEHVSVMKPT  
GCQSPFHGHGGGAGRPSPSPSRPHFGVVRQAAALAIKGEAGTAAAGASSASQSHHRTVYHHHHHHI  
HHHAASKAREQLEVEBAQRVYGGGGGGGGVGTAESEFFYAAKSRNGAENLPGITNTLPLTSNKPQTGL  
KKSSEGESGKAEEAPLEECPITRVLEEVPDRFRIQWMNVQGEKEAGRHAKTTTTSSGSSKSGSSEATPRA  
AHAWSGVATAPQRAPAVGTQPSQPFVQDQMPPLPAPNPLTLQLEEARRRLEEEKRSARVPFRSPQTQET  
LQRNRSFORQAGSQNPNSSPSILDLADRELKAGKSAQVEASDSVVVYVFCGETIPIYRTSVRGHVLT  
GHFKELLTKKGYRYFFKKAASEDFDCGVVVEQDDAILPIYEERINGKVERIE

## Branchiostoma belcheri:

>XP\_019639671.1 PREDICTED: axin-1-like isoform X1 [Branchiostoma belcheri]  
MS1GQVEYLQDTGGSKFTEDLPTSAR**RPFPVPGEE**TESNHGSQHSSSNTKSEYSTKSDYSKSDYSHSSAGTPRRNTCNDLGEFEPEGSASPTPPYLRWADNLQALLSDKDGSQFLGLYLENEDSKHLLDFYFAVNGYKKLDPLDDKTQRLAKVYAKY  
IKEGKGLSHRVKPGTGQYLAKNIDCKPLDISITFDQAQLEIEKFMEENAYRLFLESIDYLCYCRNGGEVSNQVVTELANTSNGVNLTTGAILAPLPTLHENVELSTEDTMETRLPLTAEHLLATSQIRLRSRDRERLRTGNGPNYHQTYAP  
APATSANDESILQSLSGSTDDTMSLTSDSIDLGDVSNHRRRRRQLKGMQRQDAQRNGNVMYCPPFPQPTQRLPKEMKMMEPKKFAELLIAKLEKVKQDRENKERLDEQLRRMEGDCGASQASGESQASGADPTQPRLFLPMDTTSIDDDPES  
ILDEHVSRLVLTGPCRSPPGRHSVPVRPNKSHISGVPHVFSFGALAGASAMAHNRSRPKDVSKRDSGLDGSTEAETVTHYKHYYHHHHHHHPKSRDGLGEQTEMETQKRVQRDSEMYTTQSRVHQDSMGGTAEISLRHDAREVVVKGKRGGRKEEG  
EPFLALPVEITDRFGKWDWMEEGEGERYRGGVNREPKFKSSKTASATSHRSSGKASSAKKPLAYNTRSTPSMERPAVTAERVMPQPMQDQMPVLPNPNPLCLEEARRRLEVEKSTKSGSRHVVDGARKDKGKLPQSKRVPAVSDLEP  
EEETRKPQVKKPSAMSMVSGDNTVAYYFCGEPPIPYRTLPGKIDTLAIFKNSITKRGNYRYFFKCTSEFSGNAVQVEDEDEDLPLWEGKIIGKVERIE

## Drosophila melanogaster:

>AAD24886.1 D-Axin [Drosophila melanogaster]  
MSGHSPSGIRKHDWNECSG**RPFPVPGEE**SRVKMTEGVADTSKNSSPSYLNWARTLNHLLDREDGVLEFKKYVEEEAPAYNDHNLNFYFACEGLKQOTDPEKIQIGAIYRFLRKSQLSISDDLRAQIKAITNPFIPLSPHIFDPMQRHVVEVTIR  
DNITYPTFLCSEMYLTITQMSAQBERCTISSGATSGSASGSSGSSLAGACALPPTTASGKQQLPOLVLPQAFINLPSVSVSGPPAGTCSASGVYGPPTSASSSGSISATDTLFRSSTLPTLHEDVLSLDCDFEKVQMQEGSSGLSGSVGA  
GARAPDYPIRLTRDLLIATQKKRLEIRPGAAGVYVNPSTNTNYSVYNSRVDSEKRAVSSGSDTSDTMSISCSMDGRPIYQRRHSSTESKAIQASAMANKETNTFQVIPRTQRLHSHNEHRPLKEELVSLLLPKLEEVRKKQDLLEERARERP  
GAALLNTERSASDRAPAEALIREKFPALDEMDQDQLDQHVSRWKDQTPHRSPTGMSPCCP1PSRRATDMSIDHSGVSDGMAE5LGHSMKHKSMPDHSSCSRKLNTKWPMSMTDSIGSMFSADTITYKYDASSRSGSSASKLEEAKRRLDEPR  
RSRRYAQPMQHLQQPLASFSSSGGSISLPHQFPPLPAKPPETIVVFSFCEEPVYRIKIPGTQTLRQFKDYLPRRGHFRFFFKTHCEDPDSVPIQEEIVNDSILPLFGDKAMGLVKPSD

## Hydra vulgaris:

>XP\_002155943.3 PREDICTED: uncharacterized protein LOC100206389 [Hydra vulgaris]  
MSSTALRPTFMGKAVTINFEESLSKSNINNKSIVANMHIKENGSYCENFNNTSYPNFEKWKDNFQVLEDEEGMRTFYEFGLTDQISVIFDCWYSCKTYRKRLPNKAAAEVYSRFVRIKDSRVPISDQARNNLALRLRANDITETLLLEIEQ  
EIFANLRDVCYPKFLKSDFFTFYCETNGQVAHIPSEFHRLNQGVISKMQHNLPTLTEDYADIYHTQASESGEDFHHCNDYVPMPFTFQSRTQRMDSMKQLAPEQFAKLLTEKLERLLLDREAENFTDPQLLNQNVLSSHGLPIQRSYKPAISDV  
DSQSWVMPASVRYSVAGASSTSGSCVNIIEQYPKYRNLAQDFLNAVHHGIRNHLGECQCISCQDCSRNSHHYIQESYFDSQELIKNEIFSKSNFDQSQLFNKLEYNTHNAFIQPAEPPPLVDTSKIYAMMEKNERQEKQNNYVAPSPIVRHKKLQ  
NVPEAPIAQDHNMLLPQPDGTGTVLTEVKRVLEEPKSTRRLSRSHQQRPSNVHGDHMSAISDPSYDQRHRHVGNWSSFSDTNSVVSYNPSQISSVPSCASRLWNQYGYEYEPKNELLYRGRHLSQDGMKRNENSVNHRDRHSDRDLKSTRRS  
HSDVSHPLSETRSERTHGSGNSKRTSKNSTTITYYFDTEPIPYRITIPSSSEVTLGQFKAETKRGNFRIFFKTIISAEDGEIVNEELRSDDEYLPKYNKNIIGKIEKVE

## Nematostella vectensis:

>XP\_001636924.1 axin-1 [Nematostella vectensis]  
MSEELCSTMLEFATISVSSSESDFASVSEAGIVKDDDLKSSVAQLTPRRFTSRDLQENRDRLCITDEDKLAPLGFEPEGRAVSSPTCYCERWANSFTDLLNDSGNSLFYKYLRRREGASILLDFSRECEAYRRMVPTSTQMRTTAKTLFQKFVYPRQ  
FCELLGVKDTTRTQIAHHVNDQPADPALFDGAYAEVVSVMKKCHYVGFVNSNLYKDFQAHRTDTETLTGERTPQYPGRYHSGYLPPLPEEKVLGFGEIEEEEQFELDQSCKDAIRYPYIRSAHDEQDARKLLHAPMKDIISQYYPSPVPLASRT  
ESENQSLSSDALTDDTLSTLSMTTTEGGMTDTS DGLSIPNRSRRRRGAAHKSRNGGPLPHFFVPRSHRMPKEAKNPLQPEEFAKILISKLEKVKLERELMEREASNLGICESEYGGQSKKILQEALENKQROGKIPLCTMAMSALPPMQDDAS  
SLSASNHGSSSSKSTNAQVITAGSTVRDSSSSGSTHRRSRHSHHSTKTPKQEQECADKDSDLASAQGKDPSPRSNTKPANTARPDCCIPLFTLNHQRIQLQWMEMGEEELRQOKTQKVRHQSPSSSSSRGSSKSRQSSSTKGSEHYSNHPSPQPIAQD  
PLMPPLPQPEATTVLGEVARRLVATKEMDKSRHHHHKHSKTSVDDISDSVSSCQEKIGSSSTCSCSATDCSSCAQMSLSYDINHAPSYIASSTLSSIPSSASNYPSDTKSKSDSGISGTTRKKEKHNAITIIYWLWGEPIAYRTSLPGKHITL  
GQFKTLIMRKGEFRYFFKTKTEDRECEVVVEEVKEDKMMLPTFEGKIVGKVEKVD

## Amphimedon queenslandica:

>NP\_001266244.1 axin [Amphimedon queenslandica]  
MAAIVSGNDHELALAEALQRIGGEPGTDEEDDEELSVVEYDEEQRPAPTASVVS GPAPETTTNGDNGAGGGGRYEVPEPIYIGTPSNSVPLKEVLGEYRSFMLFRRLKDKQCITRNLQFWLACEYYHTQMPLEGIAKAAKIYCRFLKSSAPLHV  
SILEATKRKICTIVQLGSPPGYTLFLEAQEVYNQMEVNELQQFLCSDSFSECSQFPTRGPTQNMYGVSVDIGFQPSPRYRNGGSLHSSDDSTSVTSFASQEDVGSHTHTQVLCPLPHHTKSVYTPRNAHSDTEHSSSHPRRQYAGPTTHISRNVL  
TQNQFYIEICEKLSAVQRDRATAMKQARNAIARIAGKSYEDIMSIDWFDTPFAIKYVCFDDEGTVAGADDGLHSPPLSLPPPHKQSVGKRTTVESSDTPPSSSTSGAPSHHLISFGLKEIQEALRDLDIASQVRQKRSTLTMSSSASSYISDSGVGE  
SNLPSSSGGGPGSSGHNRLSNRVHAYLQNRQRTVSQQSREAAQQLVATMLMNNVSPSDELNPHYHNGRRSYANYPGAYSSDDSSSCFTATSHSSNSEFFVPRRPHPLYGDSNDESRQQSHHHSRYPPGMRRLAPSNRPPSSRYLPQQTTPN  
QPPQQQLSTSNRAISPVSHPSSKSSSDTLVAYSWEGKTYANKLQVSLTLGFEKRMFKRKQYRFFFKSFCEELNDVILEEISDNSVTPLPLHEGKIYVQVEGITD

## Alignment

|                                  |                                                                        |     |
|----------------------------------|------------------------------------------------------------------------|-----|
| NP_001266244.1 [A.queenslandica] | -----MAAIVSGNDHELALALEALQ <b>RIGGEGPTDEEDDEELS</b> VVEYDEEEQRPPAPTASVV | 55  |
| XP_002155943.3 [H.vulgaris]      | -----MSSTL <b>PTTWG</b> SAV                                            | 16  |
| AAD24886.1 [D.melanogaster]      | -----MS-----GHPSG-----I--RKHD-----DNECSG <b>RPFPVPGEE</b> SR           | 29  |
| XP_001636924.1 [N.vectensis]     | -----MSIGVQ--EYLQD-----TGGSKFT-----ELCSTML <b>TPATPTG</b> SS           | 20  |
| XP_019639671.1 [B.belcheri]      | -----MSV--SEKLQRLD-----LSHIIEN-----AL---TRFPVPG <b>RG</b> SK           | 35  |
| XP_032816874.1 [P.marinus]       | MDAVNMSVGDYGVGLVD-----LGGSFT-----ED---AP <b>RPVPGEE</b> GE             | 32  |
| XP_014059686.1 [S.salar]         | MQSPYMN--VQEQGFPLD-----LGASFT-----ED---AP <b>RPVPGEE</b> GE            | 36  |
| EDL22489.1 [M.musculus]          | -----MN--IQEQGFPLD-----LGASFT-----ED---AP <b>RPVPGEE</b> GE            | 31  |
| NP_003493.1 [H.sapiens]          | -----MN--IQEQGFPLD-----LGASFT-----ED---AP <b>RPVPGEE</b> GE            | 31  |
| XP_024089076.1 [P.abelii]        | -----MN--IQEQGFPLD-----LGASFT-----ED---AP <b>RPVPGEE</b> GE            | 31  |
| NP_990275.1 [G.gallus]           | -----MN--IQEQGFPLD-----LGASFT-----ED---AP <b>RPVPGEE</b> GE            | 31  |
| NP_001089251.1 [X.laevis]        | -----MS--VKAKGFPLD-----LGGSFT-----ED---AP <b>RPVPGEE</b> GE            | 31  |
|                                  | *****                                                                  |     |
| NP_001266244.1 [A.queenslandica] | SG-----PAP-----ETTNGD                                                  | 67  |
| XP_002155943.3 [H.vulgaris]      | TINFEKSLKSNINNK-----SKVANM-----HYIKE                                   | 43  |
| AAD24886.1 [D.melanogaster]      | VKKMTEG-----ESDFASVSEAGIVKDDDLKSSVAQLTPRRFTRSDLQENRDLCTDEDKLAP         | 36  |
| XP_001636924.1 [N.vectensis]     | SNHGSQHSSSNTKSEYSTKSDYSKSDYSHSSAGTTPR-----RTNCD                        | 71  |
| XP_019639671.1 [B.belcheri]      | VNVWPEHCNDPLGARA-NGVKGGSGLDGFVRMMPR-----RMDGD                          | 73  |
| XP_032816874.1 [P.marinus]       | LVSSDGRPYGHGFY----SFKGTSILKNEASTATPR-----RPDL                          | 74  |
| XP_014059686.1 [S.salar]         | EDL22489.1 [M.musculus]                                                | 72  |
| NP_003493.1 [H.sapiens]          | LVSTDPSPASYSFC-----SGKGVGIGKETSTATPR-----RSDLD                         | 67  |
| XP_024089076.1 [P.abelii]        | LVSTDPSPASYSFC-----SGKGVGIGKETSTATPR-----RSDLD                         | 67  |
| NP_990275.1 [G.gallus]           | LVSTDPSPASYSFC-----SGKGVGIGKETSTATPR-----RSDLD                         | 67  |
| NP_001089251.1 [X.laevis]        | LITTDQRFPSTYY-----SLKNDGIKNETSTATPR-----RPDL                           | 67  |
|                                  |                                                                        |     |
| NP_001266244.1 [A.queenslandica] | NGAGGGGRYEVPEPYIGTPSPNSVPLKEVLGEYRSFMLFRFLKQDC--ITRNLFQWLACE           | 125 |
| XP_002155943.3 [H.vulgaris]      | NGSYCENFNNTSYPNFEKW--KDNFQVLLDEDEGMRTFYEFGLTDQ--ISVIFDCWYSCK           | 99  |
| AAD24886.1 [D.melanogaster]      | ---VADTSKNSSPSYL-NW--ARTLNHLLEDRDGVLFYKYVEEAPAYNDHNFYFACE              | 90  |
| XP_001636924.1 [N.vectensis]     | LGFEPEGRAVSPTPYCERW--ANSFTDLNDSNGSNLKYKLRREG--ASILLDFRECE              | 127 |
| XP_019639671.1 [B.belcheri]      | LGFEPEGSASPTPPYL-RW--ADNLQALLSDKDGSQLGLYLENED--SKHLLDFYFAVN            | 132 |
| XP_032816874.1 [P.marinus]       | LGFEPEGSASPTPPYL-RW--AESLPALLEDQDQGSILFRAFLQED--CVDLLDFWFACS           | 128 |
| XP_014059686.1 [S.salar]         | LGFEPEGSASPTPPYL-KW--AESLSHLLDDQDGIHLFRTFLKQEE--CADVLDWFFACT           | 129 |
| EDL22489.1 [M.musculus]          | LGFEPEGSASPTPPYL-KW--AESLSHLLDDQDGIHLFRTFLKQEE--CADVLDWFFACT           | 127 |
| NP_003493.1 [H.sapiens]          | LGFEPEGSASPTPPYL-KW--AESLSHLLDDQDGIHLFRTFLKQEE--CADVLDWFFACT           | 122 |
| XP_024089076.1 [P.abelii]        | LGFEPEGSASPTPPYL-KW--AESLSHLLDDQDGIHLFRTFLKQEE--CADVLDWFFACT           | 122 |
| NP_990275.1 [G.gallus]           | LGFEPEGSASPTPPYL-KW--AESLSHLLDDQDGIHLFRTFLKQEE--CADVLDWFFACT           | 122 |
| NP_001089251.1 [X.laevis]        | LGFEPEGSASPTPPYL-KW--AESLSHLLDDQDGIHLFRTFLKQEE--CADVLDWFFACT           | 122 |
|                                  | : * : . * : : :                                                        |     |
| NP_001266244.1 [A.queenslandica] | YHHTQMPLEG-----IKAAKAIYCRFLKSSAP--LHVSILEATKRKICTIVQLGSPPGY            | 177 |
| XP_002155943.3 [H.vulgaris]      | TYRKRLPNKA-----AAKEVYSRFRVRIKDSRVPISDQA---RNNLALRLANDITE               | 147 |
| AAD24886.1 [D.melanogaster]      | GLKQQTDD----PEKIKQIGAIYRFLRK-SQ--LSISDDLAQIK--AIKTNPEIPLSP             | 140 |
| XP_001636924.1 [N.vectensis]     | AYRRMVPSTQ-----MRTTAKTLFQKFVYPRQ--FCELLGVKDTTRTQIAHVNDQPADP            | 181 |
| XP_019639671.1 [B.belcheri]      | GYKKLDPLD-----DKTORLAKVYVAKYIKEGK--GILSHRVKPGTKYLAKNIDCKPLDI           | 186 |
| XP_032816874.1 [P.marinus]       | GFRKTD-----GDKRAKLAKAIYKKYIKDNA--GIVLRQIGSITRTGVKECIASKRIDS            | 180 |
| XP_014059686.1 [S.salar]         | GFRKLEANEGQGEKKLKLAKAIYKKYILDDN--GIVSRQIKPATKSFIKDCVMKRLHIDP           | 187 |
| EDL22489.1 [M.musculus]          | GFRKLEPCDS-NEEKRLKLARAIYKKYILDDN--GIVSRQIKPATKSFIKDCVMKRLHIDP          | 184 |
| NP_003493.1 [H.sapiens]          | GFRKLEPCDS-NEEKRLKLARAIYKKYILDDN--GIVSRQIKPATKSFIKDCVMKRLHIDP          | 179 |
| XP_024089076.1 [P.abelii]        | GFRKLEPCDS-NEEKRLKLARAIYKKYILDDN--GIVSRQIKPATKSFIKDCVMKRLHIDP          | 179 |
| NP_990275.1 [G.gallus]           | GFRKLEPCDS-NEEKRLKLAKAIYKKYILDDN--GIVSRQIKPATKSFIKDCVMKRLHIDP          | 179 |
| NP_001089251.1 [X.laevis]        | GFRKLEPCDS-NEEKRLKLAKAIYKKYILDDN--GIVSRQIKPATKSFIKDCVMKRLHIDP          | 179 |
|                                  | : : :                                                                  |     |
| NP_001266244.1 [A.queenslandica] | TLFLEAQEQEVYNQMEVNELQQFLCSDSFSECSQFPTRGPTQNNY-G--SVSGDIG----           | 229 |
| XP_002155943.3 [H.vulgaris]      | TLILLEIEQEIFANLRDVCYPKFLKSDFFTFYCETNGQVAHISEFHRIN-----                 | 196 |
| AAD24886.1 [D.melanogaster]      | HIFDPMQRHVEVTIRNDYPTFLCSEMYILYIQQMSAQERCTSSGA-TGSGSAGSSSGG             | 199 |
| XP_001636924.1 [N.vectensis]     | ALFDGAIYAEVVSVMKCHYGVFNSNLNKKDPTQAHRDTEITL-----GERTP-----              | 229 |
| XP_019639671.1 [B.belcheri]      | SIFDQAQLEIEKFMENAYRFLFESDIYLYQYCRNGGEVSPNQVYTELANTSNGVC-               | 241 |
| XP_032816874.1 [P.marinus]       | TMFDRAQEEVQTAMEENAYPAPLRSDDVYLAVARSGGESPRCA--DPLPAGFMAM----            | 233 |
| XP_014059686.1 [S.salar]         | AMFDQAQTEIQMTMEENTYPLFLKSDIYLEYTRTGSESPKLYS--DQCSVSG-GG----            | 239 |
| EDL22489.1 [M.musculus]          | AMFDQAQTEIQMTMEENTYPSFLKSDIYLEYTRTGSESPKLYS--DQSSSGSG-TG----           | 236 |
| NP_003493.1 [H.sapiens]          | AMFDQAQTEIQMTMEENTYPSFLKSDIYLEYTRTGSESPKLYS--DQSSSGSG-TG----           | 231 |
| XP_024089076.1 [P.abelii]        | AMFDQAQTEIQMTMEENTYPSFLKSDIYLEYTRTGSESPKLYS--DQSSSGSG-TG----           | 231 |
| NP_990275.1 [G.gallus]           | DMFDQAQTEIQCMIEDNTYPLFLKSDIYLEYTRTGSESPKIYS--DPSSSGSG-TG----           | 231 |
| NP_001089251.1 [X.laevis]        | AMFDQAQMEIQSMMEDNTYPVFLKSDIYLEYTRTIGGESPKNYS--DQSSSGSG-TG----          | 231 |
|                                  | : : . * : :                                                            |     |
| NP_001266244.1 [A.queenslandica] | -----                                                                  | 229 |
| XP_002155943.3 [H.vulgaris]      | -----                                                                  | 196 |
| AAD24886.1 [D.melanogaster]      | GSSLAGACALPPTTASGRQQLPQLVPPGAFINLPSVSSVSGPPAGTCSASGSVYGPSTAS           | 259 |
| XP_001636924.1 [N.vectensis]     | -----                                                                  | 229 |
| XP_019639671.1 [B.belcheri]      | -----                                                                  | 241 |
| XP_032816874.1 [P.marinus]       | -----                                                                  | 233 |
| XP_014059686.1 [S.salar]         | -----                                                                  | 239 |
| EDL22489.1 [M.musculus]          | -----                                                                  | 236 |
| NP_003493.1 [H.sapiens]          | -----                                                                  | 231 |
| XP_024089076.1 [P.abelii]        | -----                                                                  | 231 |
| NP_990275.1 [G.gallus]           | -----                                                                  | 231 |
| NP_001089251.1 [X.laevis]        | -----                                                                  | 231 |
|                                  |                                                                        |     |
| NP_001266244.1 [A.queenslandica] | -----FQPSRYRNGGS--LHS-----SDDSTSVSF-----A-----                         | 254 |
| XP_002155943.3 [H.vulgaris]      | -----QGVISKMQHNLPTLTEDYADIYHTQAS-----                                  | 223 |
| AAD24886.1 [D.melanogaster]      | SSGSISATDTLPRSSTPLTLHEDSVLSLCCDFEKVQMQEGGSLGSGVAGARAPDYPI              | 319 |
| XP_001636924.1 [N.vectensis]     | -----QYPGRYHSGYLPTLPEEKVLGFGEETEEQFELD-----                            | 263 |
| XP_019639671.1 [B.belcheri]      | -----NLTTGAILAPLPTLHENVELSTEDTMTET-----L-----                          | 272 |
| XP_032816874.1 [P.marinus]       | -----KGL--DSPGLQTVKEDEVLSYDSQQTTHRWPEVHCGMR-----                       | 270 |
| XP_014059686.1 [S.salar]         | -----KVL-----PGYLP TLNDEEWRCDHELEQQESDPTPSNR-----                      | 274 |
| EDL22489.1 [M.musculus]          | -----KGM-----SGYLP TLNDEEWRCKDQADEDDGRDPLPPSR-----                     | 271 |
| NP_003493.1 [H.sapiens]          | -----KGI-----SGYLP TLNDEEWRCKDQMEDDDGRDAAPPGR-----                     | 266 |
| XP_024089076.1 [P.abelii]        | -----KGI-----SGYLP TLNDEEWRCKDQMEDDDGRDAAPPGR-----                     | 266 |
| NP_990275.1 [G.gallus]           | -----KGL-----PGYLP TLNDEEWRCKDQTEPEASRDSAPSSR-----                     | 266 |
| NP_001089251.1 [X.laevis]        | -----KGP-----SGYLP TLNDEEWRCKDQGEQ--ERESVPSFL-----                     | 264 |
|                                  | : :                                                                    |     |
| NP_001266244.1 [A.queenslandica] | -----SEDVGS---THTQVLCLPHHTKSIVYTPRNAHS--DTEH                           | 287 |
| XP_002155943.3 [H.vulgaris]      | -----ESGEDFHH---H---CND-----Y-----                                     | 236 |
| AAD24886.1 [D.melanogaster]      | RLTRDLLLATQKRR-----LEIRPPGAHGYYVNPSTNTSYVP--NSRVDSE                    | 365 |
| XP_001636924.1 [N.vectensis]     | ---QSKCD--AIRYPYIRSA-HDEQDARKLLH--APMKDII SQYYPSVPLASRTESEN            | 314 |
| XP_019639671.1 [B.belcheri]      | PLTAEHLLATSQIRL-----RSDSRDRERLTRG--GNPYH--QTYAPAPATSANDEL              | 321 |
| XP_032816874.1 [P.marinus]       | PTGGSSCSFVASPRVGMPSSEKGGKYRNLWPNGPVNPNHMSGYGRAPASSANDEQ                | 330 |
| XP_014059686.1 [S.salar]         | LTQKLLQETASQRTVSTKRF-QDSHEYRVLWQ-EPVNPYYVNTGYAMAPATSANDEQ              | 331 |
| EDL22489.1 [M.musculus]          | LTQKLLLETAAPRAPSSRRY-NEGRELRYGWSR-EPVNPYYVNTGYALAPATSANDEQ             | 328 |
| NP_003493.1 [H.sapiens]          | LPQKLLLETAAPRVSSRRY-SEGREFRYGWSR-EPVNPYYVNTGYALAPATSANDEQ              | 323 |
| XP_024089076.1 [P.abelii]        | LPQKLLLETAAPRVSSRRY-SEGREFRYGWSR-EPVNPYYVNTGYALAPATSANDEQ              | 323 |
| NP_990275.1 [G.gallus]           | LTQKLLLETAQRATSTRY-SEGREFRYGWSR-EPVNPYYVNTGYAMAPATSANDEQ               | 323 |
| NP_001089251.1 [X.laevis]        | FSQKLILDSSSHCAGSNRRL-SDGREFRPGTWR-EPVNPYYVNTGYGAPVTSANDEQ              | 321 |

|                                 |                                                                |     |
|---------------------------------|----------------------------------------------------------------|-----|
| NP_001266244.1[A.queenslandica] | SSSH-----P-----RR-----QQ                                       | 296 |
| XP_002155943.3[H.vulgaris]      | -----VPE-----                                                  | 239 |
| AAD24886.1[D.melanogaster]      | ASVSSGGRTSDTMSI-----SSCSMDGRPIYQIR-RHSSTESKAIRQSAMANKET        | 414 |
| XP_001636924.1[N.vectensis]     | QSLSSDA-LTDDTLSTLSMTTTEGMDTDS-DGLSIPRNSRRR-----RGAHKSRRNGGPL   | 368 |
| XP_019639671.1[B.belcheri]      | QSLSSE--QTDDTMSL-----TDSSIDLGVSNHRRRRRLQGMQRQDAQRNGV           | 369 |
| XP_032816874.1[P.marinus]       | SLSSDA--MTDDTMSM-----TDSSVDGIPPYRLRSCAS--RUTRQSAKDSGR          | 375 |
| XP_014059686.1[S.salar]         | QSMSSA--SDVDTLSL-----TDSSVDGIPPYRIRKQHR--REMHESAKANGRV         | 376 |
| EDL22489.1[M.musculus]          | QSLSS--DADTSL-----TDSSVDGIPPYRIRKQHR--REMHESTQVNGRV            | 371 |
| NP_003493.1[H.sapiens]          | QSLSS--DADTSL-----TDSSVDGIPPYRIRKQHR--REMQUESVQVNGRV           | 366 |
| XP_024089076.1[P.abelii]        | QSLSS--DADTSL-----PDSSVDGIPPYRIRKQHR--REMQUESVQVNGRV           | 366 |
| NP_990275.1[G.gallus]           | QSMSS--DADTMSL-----TDSSIDGIPPYRLRKQHR--REMQUESAKANGRV          | 366 |
| NP_001089251.1[X.laervis]       | QSMSS--DADTMSL-----TDSSVDGIPPYRLRKQHR--REMQUESANANGRV          | 364 |
| NP_001266244.1[A.queenslandica] | YAGPTTHISR-----K--VLTQNQFYIEVCEKLSAVQDRDTAMQQRARNIARIAGKSY     | 348 |
| XP_002155943.3[H.vulgaris]      | --MPTFQSRQRMDSMKQ--LAPEQFAKLLTEKLERLLLDREAENFTDPQLLNQNVLS-     | 293 |
| AAD24886.1[D.melanogaster]      | --NTFQVIPRTQRLHSNEHRPLKEEELVSLLPKLEEVKRRQDLEERARNRFGAALLTN     | 472 |
| XP_001636924.1[N.vectensis]     | --PHFPFVPRSHRMPKEAKNPLQPEEFKAILISKLEKVKLERELMEREASNLSGI---CE   | 423 |
| XP_019639671.1[B.belcheri]      | MCYPPFPQPRQRLPKEMK-MMEPKFAELLIAKLEKVKQDRENKERLDEQLRMEGDCG      | 428 |
| XP_032816874.1[P.marinus]       | ---EVVHIPRTSRLPKDMV--VEPAKFAELISRLEQLQREDAQEAELEERLRVRAE--     | 428 |
| XP_014059686.1[S.salar]         | ---PLPHIPRTNRIPKDIH--VEPEKFAADLISRLQVQREDAQEAELEERLRVRLE--     | 429 |
| EDL22489.1[M.musculus]          | ---PLPHIPRTYRMPKEIR--VEPQKFAELIHRLEAVQRTREAEKLEERLRVRMVCP      | 426 |
| NP_003493.1[H.sapiens]          | ---PLPHIPRTYRVPKEVR--VEPQKFAELIHRLEAVQRTREAEKLEERLRVRME--      | 419 |
| XP_024089076.1[P.abelii]        | ---PLPHIPRTYRVPKEVR--VEPQKFAELIHRLEAVQRTREAEKLEERLRVRME--      | 419 |
| NP_990275.1[G.gallus]           | ---PLPHIPRTYRMPKDIH--VEPEKFAELINRLEQVQREDAQEAEKLEERLRVRAE--    | 419 |
| NP_001089251.1[X.laervis]       | ---PLPHIPRTYRMPKDIH--VDPEKFAELINRLEQVLDREAQRLERLRVRAE--        | 417 |
| NP_001266244.1[A.queenslandica] | EDIMSIDMFDTPAIIKYVCFDDEGTVAGADGL---HSP-----                    | 384 |
| XP_002155943.3[H.vulgaris]      | -----SHGLPIQ---RSYKP-----                                      | 305 |
| AAD24886.1[D.melanogaster]      | ERS-----SA---SDRA-----                                         | 481 |
| XP_001636924.1[N.vectensis]     | SEY-----GQSK-----                                              | 430 |
| XP_019639671.1[B.belcheri]      | ASQAS-----GESQASGADPT-----                                     | 445 |
| XP_032816874.1[P.marinus]       | -----EEGEGGPVATATCQA-----STTQVAAGCG                            | 454 |
| XP_014059686.1[S.salar]         | -----EEGEDADISTSTSFSSHRLPGGHPQHYNPRYSIDIGS                     | 468 |
| EDL22489.1[M.musculus]          | YSCSDSTA-----VSPQEEEGEDGEMSPG-MASHKLPSPVPA-WHHFPPRYVDMGCS      | 476 |
| NP_003493.1[H.sapiens]          | -----EEGEDGDPSSGPPGCHKLPPAPA-WHHFPPRCVDMGCA                    | 457 |
| XP_024089076.1[P.abelii]        | -----EEGEDGDPSSGPPGCHKLPPAPA-WHHFPPRCVDMGCA                    | 457 |
| NP_990275.1[G.gallus]           | -----EEGEDADISSGSPVISHKMPSAQF-FHHFAPRYSEMCA                    | 457 |
| NP_001089251.1[X.laervis]       | -----EEGDDGVSSGPSIISHKLPSPGP-MHHYNSRYSDSGCV                    | 455 |
| NP_001266244.1[A.queenslandica] | -----PLSLPPPH---KQSVGKR-----TT-----                            | 401 |
| XP_002155943.3[H.vulgaris]      | -----ALSVDV-----SQSWVM-----P---PASVRY-----                     | 324 |
| AAD24886.1[D.melanogaster]      | -----FAEAIREKFPALDEDNDQDILDQH---VSRVMKQDTPHRSPTGMSPCPPIPS-     | 529 |
| XP_001636924.1[N.vectensis]     | -----KSILQEALENKQKQKI-----PLCTMAMSALPP----                     | 459 |
| XP_019639671.1[B.belcheri]      | ---QPRLPFLMDDTTISDDDPESILDEH---VSRVLQT-----PGCRSPGRHSPV----    | 489 |
| XP_032816874.1[P.marinus]       | GGGQMAAVPVSFLSPEDDDDPESILDEH---VSRVMKT-----PGCQSPGHHGGGGAG     | 505 |
| XP_014059686.1[S.salar]         | G-----LALRPDAHEENPESILDDH---VQVRMKT-----PGCQSPGTGRHS---P       | 508 |
| EDL22489.1[M.musculus]          | G-----L--R-DAHEENPESILDEH---VQVRMKT-----PGCQSPGPHR-----        | 511 |
| NP_003493.1[H.sapiens]          | G-----L--R-DAHEENPESILDEH---VQVRMKT-----PGCQSPGPHR-----        | 492 |
| XP_024089076.1[P.abelii]        | G-----L--R-DAHEENPESILDEH---VQVRMKT-----PGCQSPGPHR-----        | 492 |
| NP_990275.1[G.gallus]           | G-----MQMR-DAHEENPESILDEH---VQVRMKT-----PGCQSPGPHRHS---P       | 496 |
| NP_001089251.1[X.laervis]       | G-----MQMR-DAHEENPESILDEH---VQVRMKT-----PGCQSPGTGRHS---P       | 494 |
| NP_001266244.1[A.queenslandica] | -----VESSDTPPSSTSG-----                                        | 418 |
| XP_002155943.3[H.vulgaris]      | -----SVAGASSTSGSCVNIQYPKYRNLAQDFL-NAV-----                     | 356 |
| AAD24886.1[D.melanogaster]      | ---RRKTATH-----DSGMVDGAMSLSGHSM-----                           | 553 |
| XP_001636924.1[N.vectensis]     | ---MQDDASSLSA-----SNHGSSSSKSTNAQV---TAGSVTRDSSSSSGSTHRRS---    | 503 |
| XP_019639671.1[B.belcheri]      | ---RPNKSHISGVPHVSPFAGALAGASAMAWNHRRG---PKDVSKRDSGLGDSTEAEVT    | 543 |
| XP_032816874.1[P.marinus]       | KPRSDSRPHPG-----VVRPQALAAIKGAETA---AAGQASS-AS---QSHHRTVY       | 554 |
| XP_014059686.1[S.salar]         | KSRSPDGPFPGGK-----VPGQMPPTT---GPGKHP-----ARLGPKEAA---SHQYHHKH- | 553 |
| EDL22489.1[M.musculus]          | ---SPDSGHVAK-----TA-VLGGTAS---GHGKHV---PKLGLKLDTA---GLHHHRHV-  | 553 |
| NP_003493.1[H.sapiens]          | ---SPDSGHVAK-----MPVALGGAAS---GHGKHV---PKSGAKLDAA---GLHHHRHV-  | 535 |
| XP_024089076.1[P.abelii]        | ---SPDSGHVAK-----MPVALGGAAS---GHGKHA---PKSGVKLDAA---GLHHHRHV-  | 535 |
| NP_990275.1[G.gallus]           | KPRSPESGHLGK-----LSGTLGTIPP---GHGKHT---TKSGMKLDAA---NLHYHKKHV- | 542 |
| NP_001089251.1[X.laervis]       | KPRSPDGHLSKT-----LPGLGTMQT---GHGKHS---SKSGKVDSG---NLHHHKKHV-   | 540 |
| NP_001266244.1[A.queenslandica] | -----HLISFGLKE-IQEALR-DLDIASQVRQKRSTL-----MSSSASSYISDSGVGE     | 465 |
| XP_002155943.3[H.vulgaris]      | -----HHGIRNHLGE-----CQCISCQDCSRN-----SHHYIQES--YF              | 388 |
| AAD24886.1[D.melanogaster]      | -----KHKSMPD-----HSSCSRKLTN--KWP-----                          | 574 |
| XP_001636924.1[N.vectensis]     | -----RH--SHHSTKTPKQ---EQECAD-----KDSDLA                        | 520 |
| XP_019639671.1[B.belcheri]      | HYHKYYYHHHHHHPKSRDGLKQTEMETQRKVQR-----DSEMYTTQSRVHQ            | 597 |
| XP_032816874.1[P.marinus]       | HHHHHHH1HHHAASKARE-----QLEVEAAQRVYGGGGGGGGVNGTAESFFYAAKSRNGA   | 601 |
| XP_014059686.1[S.salar]         | ---VHHIHPAGGKPK-----QVEADAAMRVNNGNFHW-----GTEHNYGSKSRNYA       | 599 |
| EDL22489.1[M.musculus]          | ---HHVHHN--SARPK-----QMEAEVARRVQSSFSW-----GPETHGHA-KPRSYS      | 596 |
| NP_003493.1[H.sapiens]          | ---HHVHHN--TARPK-----QVEAEATRAQSSFAW-----GLEPHSGHARSRGYS       | 579 |
| XP_024089076.1[P.abelii]        | ---HHVHHN--TGRPK-----QVEAEATRAQSSFAW-----GLEPHSGHARSRGYS       | 579 |
| NP_990275.1[G.gallus]           | ---YHHLHHHSMKPK-----QIEAEATQRVQNSPAW-----NVDSHNHYATKSRNYA      | 587 |
| NP_001089251.1[X.laervis]       | ---YHHLHHHGGVKPK-----QIEAEVTRQVQNTYPW-----NAESHNYATKSRNYA      | 585 |
| NP_001266244.1[A.queenslandica] | SNLPSSSGSGPGPSS-----GHNSRLSNRVHAYLQNOQ-----R-----VTSQQSERE     | 508 |
| XP_002155943.3[H.vulgaris]      | DSQ-----EL-----IKNEIFSKSNFDQSLFNKLEYTNHAFI--QPAEPFPLV          | 431 |
| AAD24886.1[D.melanogaster]      | -SM-----NTD-----SG-----ISMFSAD--                               | 588 |
| XP_001636924.1[N.vectensis]     | SAQ-----GKDPS-----RSNTKPANTA-----RP-----DDCIPFTLT              | 556 |
| XP_019639671.1[B.belcheri]      | DSM-----GGT---AESLRHDARREVVGKRGGRGKE-----EGEP---FLALPVETD      | 631 |
| XP_032816874.1[P.marinus]       | ENL-----P--PGITNTLPTSNKPGTLGKKSXSGSGSK---AEEAPLEEGRIRVLEEVP    | 659 |
| XP_014059686.1[S.salar]         | DGT-----GPSMPDPMGYSSKSTLSKRSFKKAEV-----RTFE--VPVPTEDVE         | 643 |
| EDL22489.1[M.musculus]          | ENA-----GTTLS-AGDLAFGGKTSAPSKRNKKAESGK---N--ANAE--VPSTTEDAE    | 643 |
| NP_003493.1[H.sapiens]          | ESV-----GAAPNASDGLAHSGKVGACKRNKKAESGK---S--ASTE--VPGASEDAE     | 627 |
| XP_024089076.1[P.abelii]        | ESV-----GAAPNASDGLAHSGKAGVACKRNKKAESGK---S--ASTE--VPGASEDVE    | 627 |
| NP_990275.1[G.gallus]           | ENL-----GMAPVPMSDLGYSKGASLLSKRNIKKTDSGK---SDGANYE--MPGSPEDVE   | 637 |
| NP_001089251.1[X.laervis]       | ESM-----GMAPNPMDSLAYSGKVMKSKRNKKAADVKG---SESASYE--VPAPVEDAE    | 635 |
| NP_001266244.1[A.queenslandica] | AQAQLVATMLMNNVSPSDE-LN---PYHNGR---RSYANYPGAYSSDDSSSCTATSH      | 560 |
| XP_002155943.3[H.vulgaris]      | DTSKIYAMMEKNERQEKQNNYVA-----                                   | 454 |
| AAD24886.1[D.melanogaster]      | -----TVT---KYKD-----AS-----                                    | 597 |
| XP_001636924.1[N.vectensis]     | NHQRIQLQWMMEGEELRQOKTQKVR-----HQSPSSSSSRGSSK-----              | 595 |
| XP_019639671.1[B.belcheri]      | RFGKVDWMMEGEERERYRGGVNVREPKFKRSSKTASQATHRSSGKASSSAAKPP-LAYNT   | 690 |
| XP_032816874.1[P.marinus]       | DRFRIMQWMVQGEKEAGRHAKT-----TTTSSGSPSK-----                     | 691 |
| XP_014059686.1[S.salar]         | RNQKILQWMMEGEAVRNKKSFY-----GSTTGSKKTP--SSHEV                   | 680 |
| EDL22489.1[M.musculus]          | KNQKIMQWIIIEGEKEISRHRKA-----GHGSSGLRKKQ-QAHES                  | 680 |
| NP_003493.1[H.sapiens]          | KNQKIMQWIIIEGEKEISRHRRT-----GHGSSGTRKKP-QPHEN                  | 664 |
| XP_024089076.1[P.abelii]        | KNQKIMQWIIIEGEKEISRHRRT-----GHGSSGTRKKP-QPHEN                  | 664 |
| NP_990275.1[G.gallus]           | RNQKILQWIIIEGEKEISRHKKT-----NHGSSGVKKQ--LSHDM                  | 674 |
| NP_001089251.1[X.laervis]       | RHQKILQWIMEGEKEISRHKKS-----NHSSSSAKKQ--PPPEL                   | 672 |
| NP_001266244.1[A.queenslandica] | SSNEEFFVPRRPHL-----YGDSDNESRQQSHHSRYPPGMRR                     | 599 |

|                                 |                                                               |     |
|---------------------------------|---------------------------------------------------------------|-----|
| XP_002155943.3[H.vulgaris]      | --PSPIV-----RHKKLQNVPEAPIAQDHNMLLPQPDGTGTVLTVKRV              | 496 |
| AAD24886.1[D.melanogaster]      | SR-----SGSSTASKLEEAKRR                                        | 614 |
| XP_001636924.1[N.vectensis]     | SRQSS-STKG-----SEHYSNHHKPSQPIAQDPLMPPLQPEATTVLGEVARR          | 641 |
| XP_019639671.1[B.belcheri]      | SRPTSMERPAV-----TAEVRPMQPFMQDTPMPVLPQPNPLICLEEARRR            | 735 |
| XP_032816874.1[P.marinus]       | --KGSEATPRAAHAWSGVATAQRAPAVGTQPSQPFVQDGPMPPLPAPNPLTQLEEARRR   | 749 |
| XP_014059686.1[S.salar]         | SRPSSVERPGAVHPWVSAQL-----RNVVQPSHPFIQDPTMPNPNAPNPLTQLEEARRR   | 734 |
| EDL22489.1[M.musculus]          | SRPLSIERPGAVHPWVSAQL-----RNSVQPSHLFIQDPTMPNPNAPNPLTQLEEARRR   | 734 |
| NP_003493.1[H.sapiens]          | SRPLSLE-----HFWAGFQL-----RTSVQPSHLFIQDPTMPHPAPNPLTQLEEARRR    | 713 |
| XP_024089076.1[P.abelii]        | SRPLSLEPGAVHPWAGFQL-----RTSVQPSHLFIQDPTMPHPAPNPLTQLEEARRR     | 718 |
| NP_990275.1[G.gallus]           | VRPLSIERPVAHVHPWVSAQL-----RNVVQPSHPFIQDPTMPNPNAPNPLTQLEEARRR  | 728 |
| NP_001089251.1[X.laevis]        | SRPLSIERPGAVHPWVSAQL-----RNVVQPSHPFIQDPTMPNPNAPNPLTQLEEARRR   | 726 |
|                                 | *                                                             |     |
| NP_001266244.1[A.queenslandica] | LAPSNRRPPSSRYLPQQTTP-----                                     | 619 |
| XP_002155943.3[H.vulgaris]      | LEEPKSTRRLSRSHQQ--RPSNHVGDHMSAYSDFSYDQRHRHVGNWSSFSDTNSVVSYN   | 554 |
| AAD24886.1[D.melanogaster]      | LEDEFRRSRRYAQPFMQHLSQQFLASFSSSG-----GS-----                   | 647 |
| XP_001636924.1[N.vectensis]     | LVATKEMDKKSRHHHKKHRSKTSVDDISDSV-----SSCQEKIGSSTCSCSA-----     | 688 |
| XP_019639671.1[B.belcheri]      | LVEKSSSTKGSS-----RH--V--VD-S--GARKDKG-----                    | 759 |
| XP_032816874.1[P.marinus]       | LLEEEKRSARVPP-----RSRQ--TQETLQRN-----RSFQRA-----              | 781 |
| XP_014059686.1[S.salar]         | LEEEKKKTGTLTQT--KQRY--VMEVIQRG-----RAAARPA-----               | 766 |
| EDL22489.1[M.musculus]          | LEEEKKRANKLPS--KQRY--VQAVMQRG-----RTCVRPA-----                | 766 |
| NP_003493.1[H.sapiens]          | LEEEKKRASRAPS--KQRY--VQEVMRRG-----RACVRPA-----                | 745 |
| XP_024089076.1[P.abelii]        | LEEEKKRASRAPS--KQRY--VQEVMRRG-----RACVRPA-----                | 750 |
| NP_990275.1[G.gallus]           | LEEEKKRAGKLPL--KQR-----                                       | 744 |
| NP_001089251.1[X.laevis]        | LEEEKKRAAKMPQ--KQRY--VQEVQIRG-----RCSVRPA-----                | 758 |
|                                 | *                                                             |     |
| NP_001266244.1[A.queenslandica] | -----                                                         | 619 |
| XP_002155943.3[H.vulgaris]      | PSQISSVSPSCASRLWNQYGYEFPKNELLYRGRHLSQDGMKRNENSVNHRDRHSRDLKS   | 614 |
| AAD24886.1[D.melanogaster]      | -----                                                         | 647 |
| XP_001636924.1[N.vectensis]     | -----TDCSSCAQSMIL--SYDINHPPAPSYIA-----S                       | 713 |
| XP_019639671.1[B.belcheri]      | -----KL-----                                                  | 761 |
| XP_032816874.1[P.marinus]       | -----GS-----                                                  | 783 |
| XP_014059686.1[S.salar]         | -----LF-----                                                  | 768 |
| EDL22489.1[M.musculus]          | -----CA-----                                                  | 768 |
| NP_003493.1[H.sapiens]          | -----CA-----                                                  | 747 |
| XP_024089076.1[P.abelii]        | -----CA-----                                                  | 752 |
| NP_990275.1[G.gallus]           | -----                                                         | 744 |
| NP_001089251.1[X.laevis]        | -----YI-----                                                  | 760 |
| NP_001266244.1[A.queenslandica] | ----NQP-----PQQQLSTSNRAISPSVHPSSKSSSDTLVAYSWEQK--TYANKLQV     | 666 |
| XP_002155943.3[H.vulgaris]      | TRRSDDVHSDVSHPLSE---TRSERTHGSGN--SKRTSKNNTTITYYFDTEPIPYRITIPS | 669 |
| AAD24886.1[D.melanogaster]      | -----ISLPH-----Q-----FP--PLPAKPPETIIVVFSFCEEPVPIYRIKIPG       | 683 |
| XP_001636924.1[N.vectensis]     | STLSSIPSSASNYPSD--TKSKSDSGISGTT--RKKEKHNTATILYMLWGEPIAYRTSLPG | 770 |
| XP_019639671.1[B.belcheri]      | PQSKVVPVAVSDLEPEEETRKQPVKK--PAS--MMSVSGDNTVVGYYFCGEPIPYRTTLPG | 817 |
| XP_032816874.1[P.marinus]       | QNPNSSPSID---LDADRELKA-GK--KSA--CQVEASDSVVVYVYFCGEPIPYRTSVRG  | 835 |
| XP_014059686.1[S.salar]         | PPLSVVPAVSDTELSE-SEHKVTKK-----PACENITVAYYFCGEPIPYRTSVRG       | 817 |
| EDL22489.1[M.musculus]          | PVLGVVPAVSDLELSE-TETKSQRK--AGG--GSAPPDCDSIVVAYYFCGEPIPYRTLVRG | 823 |
| NP_003493.1[H.sapiens]          | PVLHVVPVAVSDMELSE-TETRSQRK--VGG--GSAQPCDSIVVAYYFCGEPIPYRTLVRG | 802 |
| XP_024089076.1[P.abelii]        | PVLRVVPAVSDMELSE-TETRSQRK--VSG--GSAQPCDSIVVAYYFCGEPIPYRTLVRG  | 807 |
| NP_990275.1[G.gallus]           | -----LKPQKR--PGS--GASQPCENIVVAYYFCGEPIPYRTLVRG                | 781 |
| NP_001089251.1[X.laevis]        | PLLNVPVAVSDMDLSE-AELKPQK--TVS--SPSQPCENIVVAYYFCGEPIPYRTMVKG   | 815 |
|                                 | : : : * :                                                     |     |
| NP_001266244.1[A.queenslandica] | SCLTLGEFKEKMFRRKQYRFFFKSFCEELN-DVILEEISDNSVTLPLHEGKIVGQVEGI   | 725 |
| XP_002155943.3[H.vulgaris]      | SEVTLGQFKA--ETKRGNFRYFFKTTISAE-DGEIVNEELRSDDEYLPYRNKIIIGKIEKV | 726 |
| AAD24886.1[D.melanogaster]      | TQPTLRQFKDY-LPRRGHFRYFFKTHCEDPDSPIQEEIVNDSDLPLFGDKAMGLVKPS    | 742 |
| XP_001636924.1[N.vectensis]     | KHITLQGFCTL-IMRKGEFRYFFKTTEDRECEVVYEEVKEDKMMMLPTFEGKIVGKVEKV  | 829 |
| XP_019639671.1[B.belcheri]      | KDITLAIKFNK-ITKRGNYRYFFKCTSTEFGSNAVYQEVTEDEDLLPLMEGWKIVGKVERI | 876 |
| XP_032816874.1[P.marinus]       | HVLTGLGHFKEL-LTKKGYRYRYFKKASEDFDCGVVYEEVQDDAILPIFEEKIKGKVERI  | 894 |
| XP_014059686.1[S.salar]         | RMVMLGQFKEL-LTKKGSYRYRYFKKVSNDF--GVVFEVREDDAILPIFEEKIKGKVEKI  | 874 |
| EDL22489.1[M.musculus]          | RAVTLGQFKEL-LTKKGSYRYRYFKKVSDEFDCGVVFEVREDEAVLPVFEKIKGKVEKV   | 882 |
| NP_003493.1[H.sapiens]          | RAVTLGQFKEL-LTKKGSYRYRYFKKVSDEFDCGVVFEVREDEAVLPVFEKIKGKVEKV   | 861 |
| XP_024089076.1[P.abelii]        | RAVTLGQFKEL-LTKKGSYRYRYFKKVSDEFDCGVVFEVREDEAILPVFEKIKGKVEKV   | 866 |
| NP_990275.1[G.gallus]           | RVVTLGQFKEL-LTKKGNRYRYRYFKKVSDEFDCGVVFEVREDDTILPIFEEKIKGKVEKI | 840 |
| NP_001089251.1[X.laevis]        | RVVTLGQFKEL-LTKKGNRYRYRYFKKVSDEFDCGVVFEVREDDMILPIFEEKIKGKVEKI | 874 |
|                                 | * ** : : * : : * : : * * * * :                                |     |
| NP_001266244.1[A.queenslandica] | TD 727                                                        |     |
| XP_002155943.3[H.vulgaris]      | E- 727                                                        |     |
| AAD24886.1[D.melanogaster]      | D- 743                                                        |     |
| XP_001636924.1[N.vectensis]     | DS 831                                                        |     |
| XP_019639671.1[B.belcheri]      | E- 877                                                        |     |
| XP_032816874.1[P.marinus]       | E- 895                                                        |     |
| XP_014059686.1[S.salar]         | D- 875                                                        |     |
| EDL22489.1[M.musculus]          | D- 883                                                        |     |
| NP_003493.1[H.sapiens]          | D- 862                                                        |     |
| XP_024089076.1[P.abelii]        | D- 867                                                        |     |
| NP_990275.1[G.gallus]           | D- 841                                                        |     |
| NP_001089251.1[X.laevis]        | D- 875                                                        |     |
