# Supplementary material for: An Evolutionary Perspective on the Origin, Conservation and Binding Partner Acquisition of Tankyrases
Source: MDPI journal article supplement (doi:10.3390/biom12111688), 2022-11-15
Supplement: s1 [file s1]

>TNKS1[H.sapiens][NP\_003738.2]

MAASRRSQHHHHHHQQQLQPAPGASAPPPPPPLSPGLAPGTTASPTASGLAPFASPRHGLALPEGDGSRDPPDRPRSPDP  
VDGTSCCSTTSTICTVAAAPVVPVAVSTSSAAGVAPNPAGSGSNSSSSSSPTSSSSSSPSSPGSSLAESPEAAGVSSTAPLG  
PGAAGPGTGVPVAVSGALRELLEACRNGDVSrvKRLVDAANVNNAKDMAGRKSSPLHFAAGFGRKDVVEHLLQMGANVHARDGG  
LIPLHNACSFghAEVVSLLLQCGADPNARDNWNYPPLHEAAIKGKIDVCIVLLQHGAADPNIRNTDGKSALDLADPSAKAVLTG  
EYKKDELLEAARSNGNEEKLMAALLTPLNVNCHASDGRKSTPLHLAAGYNRVRIVQLLLQHGAADVHAKDKGGLVPLHNACSYGHY  
EVTETLLKHGACVNAMDWQFTPLHEAASKNRVEVCSLLLSHGADPTLVNCHGKSASVDMAPTPELRERLTIEFKGHSLLQAAR  
EADLAKVKKTLALEIINFKQPQSHETALHCAVASLHPKRKQVTELLLRKGANVNEKNKDFMTPLHVAAERAHNDVMEVLHKHG  
AKMNALDTLGQTALHRAALAGHLQTCRLLLSYGSDPSIISLQGFATAQMGNEAVQQILSESTPIRTSDVDYRLLLEASKAGDLE  
TVKQLCSSQNVNCRDLEGRHSTPLHFAAGYNRVSVVEYLLHHGADVHAKDKGGLVPLHNACSYGHYEVAELLVRHGASVNVAD  
LWKFTPLHEAAAKGKYEICKLLLKHGADPTKKNRDGNTPLDLVKEGDTDIQDLLRGDAALLDAAKKGCLARVQKLCTPENINC  
RDTQGRNSTPLHLAAGYNNLEVAEYLLHGHGADVNAQDKGGLIPLHNAASYGHVDIAALLIKYNTCVNATDKWAFTPLHEAAQK  
GRTQLCALLLAHGADPTMKNQEGQTPDLATADDIRALLIDAMPPEALPTCFKPQATVVSASLISPASTPSCLSAASSIDNLT  
GPLAELAVGGASNAGDGAAGTERKEGEVAGLDMNISQFLKSLGLEHLRDI FETEQITLDVLADMGHEELKEIGINAYGHRHKL  
IKGVERLLGGQQGTNPYLTFHCVNQGTILLDLAPEDKEYQSVEEEMQSTIREHRDGGNAGGIFNRYNVIRIQKVVNKKLRERF  
CHRQKEVSEENHNHNHNERMLFHGSPFINAIIHKGFDERHAYIGGMFGAGIYFAENSSKSNQYVYGIGGGTGCPTHKDRSCYIC  
HRQMLFCRVTLGKSFLQFSTMKMAHAPPGHHSVIGRPSVNGLAYAEYVIYRGEQAYPEYLITYQIMKPEAPSQTATAAEQKT

>TNKS2[H.sapiens][AAK13463.1]

MSGRRCAGGGAACASAAAEAVEPAARELFEACRNGDVERVKRLVTPEKVNSRD TAGRKSTPLHFAAGFGRKDVVEYLLQNGAN  
VQARDDGGLIPLHNACSFghAEVVSLLL RHGADPNARDNWNYPPLHEAAIKGKIDVCIVLLQHGA EPTIRNTDGR TALDLADP  
SAKAVLTGEYKKDELLESARSGNEEKMMAALLTPLNVNCHASDGRKSTPLHLAAGYNRVKIVQLLLQHGAADVHAKDKGDLVPLH  
NACSYGHYEVTETLLVKHGACVNAMDWQFTPLHEAASKNRVEVCSLLLSYGADPTLLNCHNKS AIDLAPT PQLKERLAYEFKG  
HSL LQAAREADVTRIKKHL SLEMVNFKHPQTHETALHCAA SPYPKRKQICELL LRKGANINEKTKEFLT PLHVASEKAHNDV  
VEVVVKHEAKVNALDNLGQTS LHRAAYCGHLQTCRLLLSY GCDPNIISLQGF TALQMGNENVQQLLQEGISLGNSEADRQ LLE  
AAKAGDVETVKKLCTVQSVNCRDIEGRQSTPLHFAAGYNRVSVVEYLLQHGAADVHAKDKGGLVPLHNACSYGHYEVAELLVKH  
GAVVNVADLWKFTPLHEAAAKGKYEICKLLLQHGAADPTKKNRDGNTPLDLVKDGDTDIQDLLRGDAALLDAAKKGCLARVKKL  
SSPDNVNCRDRTQGRHSTPLHLAAGYNNLEVAEYLLQHGAADVNAQDKGGLIPLHNAASYGHVDVAALLIKYNACVNATDKWAFT  
PLHEAAQKGRTQLCALLLAHGADPTLKNQEGQTPDLVVSADDVSALLTAAMPSPALPSCYKPVNLNGVRS PGATADALSSGSPS  
SPSSLSAASSLDNLSGSFSELSSVSSSGTEGASSLEKKEVPGVDFSITQFVRNLGLEHLMDIFEREQITLDVLVEMGHKELK  
EIGINAYGHRHKL IKGVERLISGQQGLNPYLTLNTSGSGTILIDLSPDDKEFQSVEEEMQSTVREHRDGGHAGGIFNRYN I LK  
IQKVCNKKLWERYTHRREK VSEENHNHANERMLFHGSPFINAIIHKGFDERHAYIGGMFGAGIYFAENSSKSNQYVYGIGGGT  
GCPVHKDRSCYICHRQLLFCRVTLGKSFLQFSAMKMAHSPPGHHSVTGRPSVNGLALAEYVIYRGEQAYPEYLITYQIMRPEG  
MVDG

>TNKS1[P.abelii][XP\_024106876.1]

MAASRRSQHHHHHHQQQLQPAPGASAPPPPPPLSPGLAPGTTASPTASGLAPFASPRHGLALPEGDGSRDPPDRPRSPDP  
VDGTSCCSTTSTICTVTAAPVVPVAVSTSSAVGAPNPAGSGSNSSSSSSPTSSSSSSPSSPGSSLAESPEAAGVSSTAPLG  
PGAAGPGTGVPVAVSGALRELLEACRNGDVSrvKRLVDAANVNNAKDMAGRKSSPLHFAAGFGRKDVVEHLLQMGANVHARDGG  
LIPLHNACSFghAEVVSLLLQCGADPNARDNWNYPPLHEAAIKGKIDVCIVLLQHGAADPNIRNTDGKSALDLADPSAKAVLTG  
EYKKDELLEAARSNGNEEKLMAALLTPLNVNCHASDGRKSTPLHLAAGYNRVRIVQLLLQHGAADVHAKDKGGLVPLHNACSYGHY  
EVTETLLKHGACVNAMDWQFTPLHEAASKNRVEVCSLLLSHGADPTLVNCHGKSASVDMAPTPELRERLTIEFKGHSLLQAAR  
EADLAKVKKTLALEIINFKQPQSHETALHCAVASLHPKRKQVTELLLRKGANVNEKNKDFMTPLHVAAERAHNDVMEVLHKHG  
AKMNALDTLGQTALHRAALAGHLQTCRLLLSYGSDPSIISLQGFATAQMGNEAVQQILSESTPIRTSDVDYRLLLEASKAGDLE  
TVKQLCSPQNVNCRDLEGRHSTPLHFAAGYNRVSVVEYLLHHGADVHAKDKGGLVPLHNACSYGHYEVAELLVRHGASVNVAD  
LWKFTPLHEAAAKGKYEICKLLLKHGADPTKKNRDGNTPLDLVKEGDTDIQDLLRGDAALLDAAKKGCLARVQKLCTPENINC  
RDTQGRNSTPLHLAAGYNNLEVAEYLLHGHGADVNAQDKGGLIPLHNAASYGHVDIAALLIKYNTCVNATDKWAFTPLHEAAQK  
GRTQLCALLLAHGADPTMKNQEGQTPDLATADDIRALLIDAMPPEALPTCFKPQATVVSASLISPASTPSCLSAASSIDNLT  
GPLAELAVGGASNAGDGAAGTERKEGEIAGLDMNISQFLKSLGLEHLRDI FETEQITLDVLADMGHEELKEIGINAYGHRHKL  
IKGVERLLGGQQGTNPYLTFHCVNQGTILLDLAPEDKEYQSVEEEMQSTIREHRDGGNAGGIFNRYNVIRIQKVVNKKLRERF  
CHRQKEVSEENHNHNHNERMLFHGSPFINAIIHKGFDERHAYIGGMFGAGIYFAENSSKSNQYVYGIGGGTGCPTHKDRSCYIC  
HRQMLFCRVTLGKSFLQFSTMKMAHAPPGHHSVIGRPSVNGLAYAEYVIYRGEQAYPEYLITYQIMKPEAPSQTATAAEQKT

>TNKS2[P.abelii][XP\_024109627.1]

MSGRRCAGGGAACASAAAEAMEPAARELFEACRNGDVERVKRLVTPEKVNSRD TAGRKSTPLHFAAGFGRKDVVEYLLQNGAN  
VQARDDGGLIPLHNACSFghAEVVSLLL RHGADPNARDNWNYPPLHEAAIKGKIDVCIVLLQHGA EPTIRNTDGR TALDLADP  
SAKAVLTGEYKKDELLESARSGNEEKMMAALLTPLNVNCHASDGRKSTPLHLAAGYNRVKIVQLLLQHGAADVHAKDKGDLVPLH  
NACSYGHYEVTETLLVKHGACVNAMDWQFTPLHEAASKNRVEVCSLLLSYGADPTLLNCHNKS AIDLAPT PQLKERLAYEFKG  
HSL LQAAREADVTRIKKHL SLEMVNFKHPQTHETALHCAA SPYPKRKQICELL LRKGANINEKTKEFLT PLHVASEKAHNDV  
VEVVVKHEAKVNALDNLGQTS LHRAAYCGHLQTCRLLLSY GCDPNIISLQGF TALQMGNENVQQLLQEGISLGNSEADRQ LLE  
AAKAGDVETVKKLCTVQSVNCRDIEGRQSTPLHFAAGYNRVSVVEYLLQHGAADVHAKDKGGLVPLHNACSYGHYEVAELLVKH  
GAVVNVADLWKFTPLHEAAAKGKYEICKLLLQHGAADPTKKNRDGNTPLDLVKDGDTDIQDLLRGDAALLDAAKKGCLARVKKL  
SSPDNVNCRDRTQGRHSTPLHLAAGYNNLEVAEYLLQHGAADVNAQDKGGLIPLHNAASYGHVDVAALLIKYNACVNATDKWAFT  
PLHEAAQKGRTQLCALLLAHGADPTLKNQEGQTPDLVVSADDVSALLTAAMPSPALPSCYKPVNLNGVRS PGAPADALSSGSPS  
SPSSLSAASSLDNLSGSFSELSSVSSSGTEGTSSLEKKEVPGVDFSITQFLRNLGLEHLMDIFEREQITLDVLVEMGHKELK  
EIGINAYGHRHKL IKGVERLISGQQGLNPYLTLNTSGSGTILIDLSPDDKEFQSVEEEMQSTVREHRDGGHAGGIFNRYN I LK  
IQKVCNKKLWERYTHRREK VSEENHNHANERMLFHGSPFINAIIHKGFDERHAYIGGMFGAGIYFAENSSKSNQYVYGIGGGT

GCPVHKDRSCYICHRQLLFCRVTLGKSFLQFSAMKMAHSPPGHHSVTGRPSVNGLALAEYVIYRGEQAYPEYLITYQIMRPEG  
MVDG

>TNKS1[M.musculus][EDL35446.1]

GKMAASRRSQHHHHHHQQQLQPAPGASAPPPPPPLSPGLAPGTPASPTAGGLAPFASPRHGLALPEGDGSRDPPDRPRSP  
DPVDGAVCTVAAPAAVPAASAAGVAPTAPAGGGGGGNNSSASSASSPTSSSSSSPSSPGSSLAESPEAAGVGSTATLGAGAAG  
LGPVPAVSGALRELLEACRNGDVSrvKRLVDAANVNAKDMAGRKSSPLHFAAGFGRKDVVEHLLQMGANVHARDDGGLIPLH  
NACSFghAEVVSLLLCQGADPNARDNWNYPthLHEAAIKGKIDVCIVLLQHGDPNIRNTDGKSALDLADPSAKAVLTGEYKKD  
ELLEAARSgNEEKLmALLTPLNVNCHASDGRKSTPLHLAAGYNRVRIvQLLQHGDVHAKDKGGLVPLHNACSYGHYEVTel  
LLKHGACVNAMDLWQFTPLHEAASKNRVEVCSLLLSHGADPTLVNCHGKSAVDMAPTPELRERLTyEFKGHSLlQAAREADLA  
KVKKTLAlEIINFKQPQSHETALHCAVASLHPKRKQVAELLLRKGANVNEKNKDFMTPLHVAAERAHNDVMEVLHKGAKMNA  
LDSLGGQTALHRAALAGHLQTCRLLLSYGSDPSIISLQGFTAAQMGNEAVQqILSESTPMRTSDVDYRLLEASKAGDLETvKQL  
CSPQNVNCRDLEGRHSTPLHFAAGYNRVSVVEYLLHHGADVHAKDKGGLVPLHNACSYGHYEVAELLVRHGASVNVADLWKFT  
PLHEAAAKGKYeICKLLKHGADPTKKNRDGNTPLDLVKEGDTDIQDLLRGDAALLDAAKKGCLARVQKLCTPENINCRDTQG  
RNSTPLHLAAGYNNLEVAEYLLLEHGADVNAQDKGGLIPLHNAASYGHVDIAALLIKYNTCVNATDKWAFtPLHEAAQKGRTQL  
CALLLAHGADPTMKNQEGQTPLDLATADDIRALLIDAMPEALPTCFKQPATVVSASLISPASTPSCLSAASSIDNLTGPlTD  
LAVGASNAGDGAAGAERKEGEVAGLDMNISQFLKSLGLEHLRDIfeTeQITLDVLADMGHEELKEIGINAYGHRHKLlKGVE  
RLGGQGTNPYLTFHCVNQGTILLDLAPEDKEYQSVEEEMQSTIREHRDGGNAGGIfnRYNVIRIQKVVNKKLRERfCHRQK  
EVSEENHNHhNERMLFHGSPFINAIiHKGFDERHAYIGGMFGAGIYFAENSSKSNQYVYIGGGTGCPthKDRSCYICHRQML  
FCRVTLGKSFLQFSTMKMAHAPPGHHSVIGRPSVNGLAYAEYVIYRGEQAYPEYLITYQIMKPEAPSQTATAAEQKT

>TNKS2[M.musculus][NP\_001157107.1]

MSGRRcAGGGAACASAGAEAVEPSARELFEACRNGDVERVkrLVtPEKvNSRDtAGRKSTPLHFAAGFGRKDVVEYLLQNGAN  
VQARDDGGLIPLHNACSFghAEVvNLLlQHGDAPNARDNWNYPthLHEAAIKGKIDVCIVLLQHGAePTIRNTDGRTALDLADP  
SAKAVLTGDYKKDELLESARSGNEEKmALLTPLNVNCHASDGRKSTPLHLAAGYNRVKIvQLLlHHGADVHAKDKGDLVPLH  
NACSYGHYEVTellVKhGACVNAMDLWQFTPLHEAASKNRIEVCsLLLSYGADPTLLNCHNKSAIDLAPtAQlKERLSyEFKG  
HSLlQAAREADVtRIKKHLSLEmvNFKHPQThETALHCAAASPYPKRKQICeLLLRKGANTNEKtKEfLTPLHVASENAHNDV  
VEVVVKHEAKVNALDSLQGTSLHRAAHCGHLQTCRLLLSYGCDPNIIISLQGFTALQMGNEENVQqLLQEGASLGhSEADRQlLE  
AAKAGDVETVKKLCTVQSVNCRDIEGRQSTPLHFAAGYNRVSVVEYLLQHGDVHAKDKGGLVPLHNACSYGHYEVAELLVKH  
GAVNVADLWKFTPLHEAAAKGKYeICKLLlQHGAADPTKKNRDGNTPLDLVKDGDTDIQLDRLRGDAALLDAAKKGCLARVKKL  
SSPDNVNCRDTQGRHSTPLHLAAGYNNLEVAEYLLlQHGDVNNAQDKGGLIPLHNAASYGHVDVAALLIKYNACVNATDKWAFt  
PLHEAAQKGRTQLCALLAHGADPTLKNQEGQTPLDLVSADDSALLTAAMPpSALPTCYKpQVLsgVRGPATADALSSGpS  
SPSSLSAASSLDNLsgSFSELSAVVSSSAAGATGLQRKEDSGIDFSITQfIRNLGLEHLMDIFEREQITLDVLVEMGHKElK  
EIGINAYGHRHKLlKGVeRLISGQqGLNPYLTLNNSGSGTILIDLSPDDKEfQSVEEEMQSTVREHRDGGHAGGVfnRYNIlK  
IQKVCNKKLWERYThRRKEVSEENHNhANERMLFHGSPFVNAIiHKGFDERHAYIGGMFGAGIYFAENSSKSNQYVYIGGGT  
GCPiHKDRSCYICHRQLLFCRVTLGKSFLQFSAMKMAHSPPGHHSVTGRPSVNGLALAEYVIYRGEQAYPEYLITYQIVRPEG  
MVDG

>TNKS1[G.gallus][NP\_989671.1]

MAAPPRRSQHHHHHHGPPPPPGPASPPAAASPPRSPSLAPAElGPAAQRHSLAGPEGEAPPDAERPPAPECESEGAAPGPPPGS  
GSSSGSSASSSSSSSSSTSSSVASSPAAESPEAAGPSGAFRELLACRNGDVTRVkrLVdAGNVNAKDMAGRKSTPLHFAAGFG  
RKDVVEHLLQTGANVHARDDGGLIPLHNACSFghAEVVSLLLCQGADPNARDNWNYPthLHEAAIKGKIDVCIVLLQHGDAPNI  
RNTDGKSALDLADPSAEAVLTGEYKKDELLEAARSgNEEKLmALLTPLNVNCHASDGRKSTPLHLAAGYNRVRIvQLLlQHGA  
DVHAKDKGGLVPLHNACSYGHYEVTellLKHGACVNAMDLWQFTPLHEAASKNRVEVCSLLLSHGADPTLVNCHGKSAVDMAP  
TPELRERLTyEFKGHSLlQAAREADLAKVKKTLAlEIINFKQPQSHETALHCAVAHVHPKRKQVTELLLRKANVNEKNKDFM  
TPLHVAAEKAHNDVMEVLHKGAKMNAldTLGQTALHRAALAGHLQTCRLLlNYGSDPSIISLQGFTAAQIGNEAVQqILSES  
TPVRTSDVDYRLLEASKAGDLETvKQLCSPQNVNCRDLEGRHSTPLHFAAGYNRVSVVEYLLHHGADVHAKDKGGLVPLHNAC  
SYGHYEVAELLVRHGASVNVADLWKFTPLHEAAAKGKYeICKLLlKHGADPTKKNRDGNTPLDLVKEGDTDIQDLLRGDAALL  
DAAKKGCLARVQKLCTPENINCRDTQGRNSTPLHLAAGYNNLEVAEYLLLEHGADVNAQDKGGLIPLHNAASYGHVDIAALLIK  
YNTCVNATDKWAFtPLHEAAQKGRTQLCALLAHGADPTMKNQEGQTPLDLATADDIRALLIDAMPEALPTCFKLQATVVSAS  
SLISPASTPSCLSAASSIDNLTGPlAEALAVGGASNTGDGAAGTERKEGEVSGLDMNITQFLKSLGLEHLRDIfeTeQITLDVL  
ADMGHEELKEIGINAYGHRHKLlKGVeRLlGGQGTNPYLTFHCVSQGTILLDLAPDDKEYQSVEEEMQSTIREHRDGGNAGG  
IFNRYNVIRIQKVVNKKLRERfCHRQKEVSEENHNHhNERMLFHGSPFINAIiHKGFDERHAYIGGMFGAGIYFAENSSKSNQ  
YVYIGGGTGCPthKDRSCYICHRQMLFCRVTLGKSFLQFSTMKMAHAPPGHHSVIGRPSVNGLAYAEYVIYRGEQAYPEYLI  
TYQIVKPEAPSQTGTAAEQKT

>TNKS2[G.gallus][NP\_989672.1]

MAARRCAGGAALAEAPGCGSAVEPARELFEACRNGDVERVkrLVrPENvNSRDtAGRKSSPLHFAAGFGRKDVVEYLLQSGA  
NVHARDDGGLIPLHNACSFghAEVvNLLlRHGANPNARDNWNYPthLHEAAIKGKTdVCIVLLQHGAePTIRNTDGRTALDLAD  
PSAKAVLTGEYKKDELLESARSGNEEKmSLLTPLNVNCHASDGRKSTPLHLAAGYNRVKIvQLLlQHGDVHAKDKGDLVPL  
HNACSYGHYEVTellVKhGACVNAMDLWQFTPLHEAASKNRVEVCSLLLSYGADPTLLNCHNKSTIDLAPtPQlKERLAYEFK  
GHSLlQAARESDVARIKHLSLEtVNFKHPQThETALHCAAASPYPKRKQVCeLLLRKANINEKtKDFLTPLHVASEKAHND  
VVEVVVKHEAKVNALDNLGQTSLHRAAHCGHLQTCRLLlSSGCDPSIVSlQGFTALQMGNESVQqLLQEGIFLGNsDADRQlL  
EAAKAGDVDTVKKLCTVQSVNCRDIEGRQSTPLHFAAGYNRVSVVEYLLlQHGDVHAKDKGGLVPLHNACSYGHYEVAELLVK  
HGAVNVADLWKFTPLHEAAAKGKYeICKLLlQHGAADPPKKNRDGNTPLDLVKDGDTDIQLDRLRGDAALLDAAKKGCLARVKK  
LCPDNVNCRDTQGRHSTPLHLAAGYNNLEVAEYLLlQHGDVNNAQDKGGLIPLHNAASYGHVDVAALLIKYNACVNATDKWAF  
TPLHEAAQKGRTQLCALLAHGADPTLKNQEGQTPLDLVTADDVSALLTAAMPpSALPSCYKpQVISVSQTASSTADPLSSVP  
SSPSSLSAASSLDNLsgSFSELPsvVGTNSAAGATVLEKKEVSGVDFSINQfVRNLGLEHLIDIFEREQITLDVLVEMGHKEl

KEIGINAYGHRHKIIKIGVERLISGQQGLNPYLTLNTSSSGTLLIDLSSSEDFEQSVVEEMQSTVREHRDGGHAGGVFNRYNII  
KIQKVCNKKLWERYTHRRKEVSEENHNHANERMLFHGSPFVNAIIHKGFDERHAYIGGMFGAGIYFAENSSKSNQYVYGIGGG  
TGCPIHKDRSCYVCHRQLLFCRVTLGKSFLQFSAMKMAHSPPGHHSVTGRPSVNGLALAEYVIYRGEQAYPEYLITYQIVKPE  
ATTEA

>TNKS1[X.laevis][XP\_018099068.1]  
MAAPSRSSQQQQVPTAAAGQSSQPPSASPPLSPSSRRAASCLSPPCSPETNALSLSREGPDSEPEGEAASQPGITPRPLSPPP  
GEEANILSPTSSLPPAPAPSSGSSSSSSSSPSSNSLCTGGSPAESPESGVIGGVSSVGIGPGDPLSAVSGAFRELFEACRNGDV  
SRVRRLLLEPANVNAKDMAGRKSTPLHFAAGFGRKDVVEHLLQTGANVHARDDGGLIPLHNACSFHGAEVVTLTLLCQGADPNAR  
DNWNYTPLHEASIKGKIDVCIVLLQHGADPNIRNTDGKSALDLADPSSKTVLTGEYKKDELLEAARSGNEEKLMAALLTPLNVN  
CHASDGRKSTPLHLAAGYNRVQIVQLLLQHGADVHAKDKGGLVPLHNACSYGHFEVTESSLKHGACVNAMDWQFTPLHEAAS  
KNRVEVCSLLLSHGADPTLVNCHGKSAVDMAPTPELKERLSYEFKGHSLLLQAAREADLAKVKKTLALEIINFKQPQSHETALH  
CAVASLHPKRKQITELLRLKGASVNEKNKDFMTPLHVAERAHNDVVEVLHKGAKMNALDTLGQ TALHRAALGGHLQTCRLL  
LSFGSDASIVSLQGFTAAQMGNEAVQQILNESTPVRTSDVDYRLLEASKAGDLDIVKQLCSSQNVNCRDLEGRHSTPLHFAAG  
YNRVSVVEYLLHHGADVHAKDKGGLVPLHNACSYGHYEVAELLVRHGASVNVADLWKFTPLHEAAAKGKYEICKLLLLKHGADP  
TKKNRDGNTPLDLVKDGDTDIQDLLRGDAALLDAAKKGCLARVQKLCQTQENINCRDTQGRNSTPLHLAAGYNNLEVAEYLL  
EHGADVNAQDKGGLIPLHNAASYGHVDIAALLIKYNTCVNATDKWAFTPLHEAAQKGRQTQCALLLAHGADPTMKNQESQTPDL  
ATADDIRALLIDAMPPEALPSCFKPQATVVSASIISSPPTPSCLSAASSIDNLTGPLAELAVGGVSNAGDGAAGTERKEGEV  
VLDININQFLKSLGLEHLRDI FETEQITLVDLADMGHEELKEIGINAYGHRHKLIKIGVERLLGGQQGTNPYLTFFHCVSQGT  
VLDLASDDKEYQSVVEEMQNSIREHRDGGNAGGVFNRYNVIRIQKVVNKKLRERFCHRQKEVSEENHNHNHNERMLFHGSPFNA  
IIHKGFDERHAYIGGMFGAGIYFAENSSKSNQYVYGIGGGTGCPTHKDRSCYICHRQMLFCRVTLGKSFLQFSTMKMAHAPPG  
HHSVIGRPSVNGLAYAEYVIYRGEQAYPEYLITYQIMKPETPLQAATTAEQKT

>TNKS2[X.laevis][XP\_018082988.1]  
MSGRRCAGASGSAASHGNI GAGGEPARELFEACRNGDVERVRKLVNSDNVNSRDTAGRKSTPLHFAAGFGRKDVVEHLLQSGA  
NVHARDDGGLIPIHNACSFHGAEVVSLLLRHGADPNARDNWNYPPLHEAAIKGKIDVCIVLQHGADPTIRNTDSRTALDLS  
PSAKAVLTGEYKKDELLESARSGNEEKLMAALLTPLNVNCHASDGRKSTPLHLAAGYNRVKIVQLLLQHGADVHAKDKGDLVPL  
HNACSYGHYEVTETLLVKHGASVNAMDWQFTSLHEAASKNRVEVCSLLLSYGADPTMLNCHNKSALDLAPTQPKERLSYEFK  
GHSLLLQAAREADLTRIKKHSLEIVNFKHPQTHDTALHCAASSPYPKRKQVCELLFRKGANVNEKTKDFLTPLHIASDKAHND  
IVELLIKHEAKVNALDNLGQTSLHRAAHCGHLQTCRLLNSGCDPVSIVSLQGFTALQMGNESVQQLLQEGLPFSNSDADSQ  
LL EAAKAGDLDVVKKLTQSQVNCRDVEGRQSTPLHFAAGYNRVAVVEYLLQHGADVHAKDKGGLVPLHNACSYGHYEVTETLLV  
KGAVINVADLWKFTPLHEAAAKGKYEICKLLLLHGADSTKKNRDGNTPLDLVKDGDTDIQDLLRGDAALLDAAKKGCVSRVKK  
LCTPENVNCRDTQGRHSTPLHLAAGYNNLEVAEYLLQHGADVNAADKGGLIPLHNAASYGHVDVAALLIKYNACVNANDKWAF  
TPLHEAAQKGRQTQCALLLAHGADPALKNQEGQAPLDLVTADDVRALLTAAMPAPALPTFYKQQLLNVPQBPSTTAIAALSSVP  
LSSPTLSAASSLDNLASSFSETTSVSSGGAEGASGLDKKDEGVLDNLINQFLRNLGLEHLIDVFEREQITLVDLIEMGHKEFKE  
IGISAYGHRHKIIKIGVERLISGQHGLNPYLTLNTSNSGTILIDLAPDDKEFLSVEEEMQSTVREHRDGGHAGGVFTKYNIILKI  
QKVCNKKLWEKYTHRQKEVTEENHNHNSNERMLFHGSPFVNAIIHKGFDERHAYIGGMFGAGIYFAENSSKSNQYVYGIGGGT  
GCPIHKDRSCYVCHRQLLFCRVTLGKSFLQFSAMKMAHSPPGHHSVTGRPSVNGLALAEYVIYRGEQAYPEYIIITYQIMKPEAV  
AEG

>TNKS1[S.salar][XP\_014017013.1]  
MAVSRSSQQQQGNLLSPFRNGSLSVSPPGSPSLNLVTATLVPPDGERGCSTGMENPLASPDQLQTSALSSGSSTSPTTTTSGG  
GSSSVSSPGSGGTPDGDGSGIGGAFRELFEACRNGDVSRVKRLVDSVNVNAKDMAGRKSTPLHFAAGFGRKDVVDHLLQTGAN  
VHARDDGGLIPLHNACSFHGAEVVSLLLCQGADPNARDNWNYPPLHEAAIKGKIDVCIVLLQHGADPNIRNTDGKSALDLADP  
SAKAVLTGEYKKDELLEAARSGNEEKLMAALLTPLNVNCHASDGRKSTPLHLAAGYNRVRIVQLLLQHGADVHAKDKGGLVPLH  
NACSYGHFEVTELLLLKHGACVNAMDWQFTPLHEAASKNRVEVCSLLLSHGADPTLLNCHSKSAVDMAPTPELKERLTYEFKG  
HSLLLQAAREADMAKVKKTLALEIISFKHPQTNETALHCAVASPHPKRKQVTELLLRKGANINEKNKDFMTALHVASERAHNDI  
LEVLLQHGAKVNAVDTLGQ TALHRAALAGHIQTCRLLLSYGADPAIVSLQGFTASQMGNEAVQQILNENVPTNSDVIDYRFL  
EAAKAGDLDTVQQLCTPQNVNCRDLEGRHSTPLHFAAGYNRVAVVEYLLHHGADVHAKDKGGLVPLHNACSYGHYEVAELLVRH  
GASVNVADLWKFTPLHEAAAKGKYEICKLLLLKHGADPTKKNRDGNMPLDMVKDGDTDIQDLLRGDAALLDAAKKGCLARVQKL  
CSPENINCRDTQGRNSTPLHLAAGYNNLEVAEYLLHAGADVNAQDKGGLIPLHNAASYGHVDIAALLIKFNTCVNATDKWAFT  
PLHEAAQKGRQTQCALLLAHGADPTMKNQEGQTALDLATADDIRALLMDAMPDPALPSCFKPQATVVSAGSVISPASTPSCLS  
AASSIDNLAGPLNELGAAGTSGVADGATGSDRKEGELVMDLNMNISQFLKSLGLEHLRDI FEREQISLDVLADMGHEELKEIGI  
NAYGHRHKLIKIGVERLLGGQQGANPYLTFFHCANQGTVLIDLAPDDKEGQSVVEEEMQSTIREHRDGGNAGGVFSRYNIIKIQKV  
VNKKLRERYTHRQKEISDENHNHNHNERMLFHGSPFINAIIHKGFDERHAYIGGMFGAGIYFAENSSKSNQYVYGIGGGTGCPT  
HKDRSCYLCHRQMLFCRVTLGKSFLQFSAMKMAHAPPGHHSVIGRPSVNGLAYAEYVIYRGEQAYPEYLITYQILKPESTATS  
AAGEDQKS

>TNKS2[S.salar][XP\_014034742.1]  
MASVARFWGSANTNSKLYIYENTTPLMSTRQCSRVLGLGGVFPVGVDTPRSSEPNIREFEACRNGDVERVRRLVRPENVNSRDT  
AGRKSTPLHFAAGFGRDGVVDYLLQNGANVHARDEGGLVSLHNACSFHGHSEVVNLLLRHGADANSRDNWSYTPLHEAAIKGKS  
EVCIVLLQHGAEPTIRNTDGRTALDLAEASTKAVLTGEYRKDDLLESARSGNEDKLMAALLTPLNVNCHASDGRKSSPLHLAAG  
YNRVKTVQLLLKHGADVHAKDKGDLVPLHNACSYGHYEVTDLIVKQGACVNAMDWQFTPLHEAASKNRVDVCSLLVSYGADP  
TFLNCHNQSAIDLSPTPQLKERLAYEFRGHALLQAAREADLRLKKHLSLETITFKHPLTHETALHCAATSPYPKRKQVCELL  
LRKGANVNEKTKDFLTPLHLASEKSHNDIEVLVKHEAKVNALDNLGQ TALHRAAHCGHLQTCRLLLKAGCDPLVMSLQGFSP  
SQMGNESVQEILHEGTLIGNSDVDWQLEASKSGDLEIVKKLCTMQNVNCRDVEGRQSTPLHFAAGYNRVSVVEYLLHHGADV  
HAKDKGGLVPLHNACSYGHYEVAELLVIHGAVVNIADLWKFTPLHEAAAKGKYEICKLLQHGADPTKKNRDGSTPLDLVKDG  
DTDMQDLLRGDAALLDAAKKGCLARVEKLCSPDNVNCRDAQGRHSTLLHLAAGYNNLEVAEYLLQHGAEVNSQDKGGLIPLHN

AASYGHVDVAALLIKYDACVNATDKWAFTPLHEAAQKGRQTQLCALLLAHGADPALRNQEGQSPLDLVTVDVDRALLTAAMPSPS  
ALPGCYKPVVISMSSPVGVVPPSLASASTPLSTLASRNSLDNQATASTCTAFPELPALLGPGSGAVGTDNKEVPGVDLSIGQF  
LNNLGLEHLLLEIFEREQITLDVLVEMGHKELKEIGINAYGHRHKIKGVERLISGPQSLNPYLTNTANS GTILIDLVSDDKE  
FQLVEEELQSTIREHRDGGLAGGVFNRYNIVKIQKVCNKKLWERYTHRREKVESEENHNHNSNERMLFHGSPFVNAI IHKGFDER  
HAYIGMFGAGIYFAENSSKSNQYVYIGGGTGCKHLKDRSCYVCQRHLLFCRVTLGKSFLQFSAMKMAHSPFGHHSVTGRPS  
VNGLSLAEYVIYRGEQAYPEYLITYQILKPDASVDG

>TNKS[P.marinus][XP\_032806710.1]

MAARRAHLASPPSSSSSLSPSSGSLDTTTAAAAAAAATTTAAAAAATTTAAAMTTTAAVSATSSPSTTAAAAAAVAAAAATGSG  
PGSGQDSSADGGDAGKELFEACRNGDVGRVKRLVSPNLVNARDTTGRKSTPLHFAAGFGRKDVVEHLLQNGANVHARDDDGGLI  
PLHNACSFGHAENVNLLLRQGADPNARDNWNYPPLHEAAIKGKIDVCIVLLQHGADPGIRNTDGKTALDLAEPTAKAVLTGEY  
KKDELEEAARSGNEEKLMALLTPLNVNCHASDGRKSTPLHLAAGYNRVIRIVQLLLQHGADVHAKDKGGLVPLHNACSYGHYEV  
TELLVKHGASVNAMD LWQFTPLHEAASKNRVEVCSLLLSYGADPTLLNCHSKSAIDLAPTSELKERLVYEFRGHSLQAAREA  
DVTRVKKHLGLDIINFKHPQTHETALHCAVASPYPKRKQVSELLLRKGANVNEKTKDLLTPLHVASDKAHNDVIDVLLKHGAK  
INVTDSLQGTSLHRAAHAGHLTTTCRLLLSHGCDPNLPSLQGFATAAQLGNESVQQILHESLTPVRNSDVEHQLLEAAKAGDLDT  
VKQLCTTQTVCNCRDMEGRHSTPLHFAAGYNRVSVVEYLLQHGADVHAKDKGGLVPLHNACSYGHYEVAEELLVKRGAVNVNADL  
WKFTPLHEAAAKGKYEICKLLLKHGADPTKKNRDGNTPLDLVKEGDTDIQDLLRGDAALLDAAKKGCLARVQKLCSEGENVNC  
DSQGRNSTPLHLAAGYNNLEVAEYLLLEHGADVNAQDKGGLIPLHNAASYGHVDIAALLIKYSACVNATDKWAFTPLHEAAQK  
RTQLCALLLAHGADPSMKNQEGQTPLDLATADDVRALLIDAMPPEALPVTHKPPSIPTIAATSAAATAALALGPTPALASLAP  
SPVPSGASASGAGGVPLLASPSSTPASLSAASSMDSLTGACGVAPSPVPAGAIAGAAGDGTLLGACGVSADGATGPADKPD  
RSADFEIPGLDMNINMFLKGLGLDHLRDI FEKEQITLDVLADMGHEELKEIGINAYGHRHKIKGVERLLGAQQGGLAYPGAN  
PYLSYHTTAQGTLLIDLPPDDKEYQSVEDEMQSTIREHKDGGQAGGVFNRYNVIKIQKVRNKKLWERYTHRREKVEEENHNHH  
NERMLFHGSPFINAI INKGFDERHAYIGMFGAGIYFAENSSKSNQYVYIGGGTGCPVHKDRSCYICQRQMLFCRVTLGKSF  
LQFSAMKMAHSPFGHHSVIGRPSVNGLAFAEYVIYRGEQAYPEYLITYQILKPECTPDLTSAAGQKS

>TNKS[B.belcheri][XP\_019641281.1]

MAGRAMLSSDRIHCDESSGCRELFEACRNGDVARVKKLITPQNVNARDTAGRKSTPLHFAAGFGRKDVVEHLLQNGANVHAR  
DDGGLIPLHNACSFHAEVVTLLLRNGADPNARDNWNYPPLHEAAIKGKIDVCIVLLQNGADPSIRNTDGKTALDLAEPSAKT  
VLTGDYKKDELLEAARSGNEDKLMALLTPLNVNCHASDGRKSTPLHLAAGYNRVIRIVQLLI QHGADVHAKDKGGLVPLHNAC  
YGHFEVTELLLKHGASVNAMD LWQFTPLHEAASKSRIEVCSSLLLSHGADPTLLNCHSKSAIDVASTPELQEKLSYEFKGHCLL  
DGARQTDMAKVKKHLQLDIVNFKHPYTHDTALHCAALSPYPKRRQITELLIRKGANLNDKNKEFLTPLHVASDKYIDVMEVL  
LKHGAKVNALDSLQGTALHRGAHCHGVQACRLLLSFGVDPISIVSLQGVATAAQMATEAVQQMLHEDPPSGPADECDQLEAAKA  
GDLEAVKVLCPNPTVCNCRDVNCRHSTPLHFAAGYNRVAVVEYLLQHGADVHAKDKGGLVPLHNACSYGHYEVCELLLKHGAVV  
NVADLWKFTPLHEAAAKGKYEICKLLLKHGADPNKKNRDNTPLDLVRDGDTDI QDLLRGDAALLDAAKGNLARVQKLATPE  
NINCRDTQGRNSTPLHLAAGYNNVEVAEFLENGADVNAQDKGGLIPLHNASSYGHVEIAQLLIKYGTCVNATDRWNFTPLHE  
AAQKGRQTQLCALLLAHGADPTMKNQEGQTPLDLATAEDVRALLVDAMPQSLPAAITAATVKAASPISSPSTTPSSTPGVLST  
ASSMDHLVGAVGGAGQGDGAIDRSAGEGESLLDMTISSEFLQQLGLNLQDLDFNKEQITLDILGEMGHEELKEIGVNAYGHRHK  
LIKGVERILGGTGHTLPIYLTALGSHGTILTDLSDDKEYQSVEEVQSTIRQHKDQGGAGGIFNRYNVIKIQKVRNKRLED  
RYVHRREKVESEENHNQSNERMLFHGSPFINAI INKGFDERHAYIGMFGAGIYFAENSSKSNQYVYIGGGTGCP IHKDRSCY  
ICQRQMLFCRVTLGKAFLQFSAMKMAHAPPGHHSVIGRPSVGGLNFAEYVIYRGEQAFPEYLITYQIVKPEAPAAPSPDQK

>TNKS[D.melanogaster][NP\_651410.1]

MANSSRSRAILSVNLDVAMANDPLRELFEACKTGEIAKVKKLITPQTVNARDTAGRKSTPLHFAAGYGRREVVEFLLNSGASI  
QACDEGLHPLHNCCSFGHAENVRLLLKAGASPNTTDWNYPPLHEAASKGKVDVCLALLQHGANTIRNSEQKTPLELAD  
TRPVLTGEYRKDELLEAARSGAEDRLLALLTPLNVNCHASDGRNSTPLHLAAGYNRIGIVEILLANGADVHAKDKGGLVPLHN  
ACSYGHFDVTKLLIQAGANVNANDLWAFPLHEAASKSRVEVCSLLLSRGADPTLLNCHSKSAIDAAPTREL RERIAFEYKGH  
CLLDACRKCDVSRAKKLVC AEIVNFVHPYTGDTPLHLAVVSPDGKRKQLMELLTRKGSLLNEKNKAFLTPLHLAAELLHYDAM  
EVLLKQGAQVNALDSLQGTPLHRCARDEQAVRLLLSYAADTNIVSLEGLTAAQLASDSVLKLLKNPPDSETHLLEAAKAGDL  
TVRRIVLNNPISVNCRDLDGRHSTPLHFAAGFNRPVQVFLLEHGAEVYAADKGGLVPLHNACSYGHYEVTELLVKHGANNV  
SDLWKFTPLHEAAAKGYDICKLLLKHGADPMKKNRDGTADLVKESDHDVAELLRGPSSALLDAAKGNLARVQRLVTPESI  
NCRDAQGRNSTPLHLAAGYNNFECAEYLLENGADVNAQDKGGLIPLHNASSYGHLDIAALLIKHKT VVNATDKWGFTPLHEAA  
QKGRQTQCSLLLAHGADAYMKNQEGQTPIELATADDVKCLLDAMATSLSQQALSASTQSLTSSSPAPDATAAAAPGTSSSSS  
SAILSPTTETVLLPTGASMILSVPVPLPLSSSTRISPAQGAEEANGAEGSSDDLLPADTITNVSGFLSSQQLHHLIELFERE  
QITLDILAEMGHDDLKQVGVSAYGFRHKILKGIAQLRSTTGIGNNVNLC TLLVDLLPDDKEFVAVEEEMQATIREHRDNGQAG  
GYFTRYNIIRVQKVQNRKLWERYAHRREQEIAEENFLQSNERMLFHGSPFINAIVQRGFDERHAYIGMFGAGIYFAEHSSKSN  
QYVYIGGGIGCPSHKDKSCYVCPRLLLCRVALGKSFLQYSAMKMAHAPPGHHSVVGSRPSAGGLHFAEYVVYRGEQSYPEYL  
ITYQIVKPDDSSSGTETDR

>TNKS[N.vectensis][XP\_032220531.1]

MPCQAKMASKKLASNPTFLSDPDVCEGGRELFEACRNGDVSKVRKLVNNSNVNVRD TAGRKSSPLHFAAGFGRKEVVEYLLQ  
CGADVHAMDDGGLIPLHNACSFHAEVVRILLSHGADANARDNWNYPPLHEAAVKGKVDVCVLLQHGADPNIRNTDGKTALD  
VAEAAAKLVLTGDYKDELLEGARSGNEEKLM SLLTPLNVNCHASDGRKSTPLHLAAGYNRVGVVQLLLKHGADVHAKDKGGL  
VPLHNACSYGHFEVTELLIKHGASVNAMD LWQFTPLHEAASKARVEVCALLLHGADPTLLNCHSKSAIDAAPTKE LQEKLLS  
EFKGHQLLEAAKGCDTAKIKKLIT TETINFQHPLTLDTPLHVAVASSSPKKKGV IETLLKKGADPNLQNKSSYAPLHVAAEKG  
LFEAMELLLKHGAKVNAIDSAGQTALHVAAIAGQVQACRVLMNGADPTCQTFQGYTAFEVAPEPVQKVLHVNEESPSPVSDA  
EKQLEAAKTGDL ETVKNLCTAQTVNCRDL DGRCTPLHFAAGYNRVRVVEYLLNGADVHAKDKGGLVPLHNACSYGHYEV  
ELLVKHGAIVNVADLWKFTPLHEAAAKGKYEICQLLLKHGADPQKKNRDGYTPLDLVKEGSDVADLLRGDAALLDAAKGNL  
IRITKLATPENINCRDTQGRNSTPLHLAAGYNHLEVAEYLLLEHGADVNAQDKGGLIPLHNASSYGHVDIAALLIRYNTDVNAT

DRWLFTPLHEAAQKGRTQLCALLLAHGAEPMSKNQEGQSPVDLATAEDVKCLLGDAMLSTQTTSVSTAPVAKVPAPVTATAGA  
ATPATGPISGMAPLSQANSSLLANSPAGHGDGAFSNRSVSEAQGEAVRSISAVHPGLDVDVGQFLDGLQLNNLKEIFEREQIS  
WDVLVDMGHEELKEIGIHAYGHRHKILKAVKEKISGMGLGLGPFSTSQVQGSVIQELSMVDKDFASVADEMQSTIVEHRDSGT  
AGGVFTSYTILKIERVVNTKLWEKYVYRRREIADSNHNHANERMFLFHGSPFINAIVQKGFQQRHAYIGGMFGAGIYFAENSSK  
SNQYVYGIGGGSGCPTHKDRSCYSCERQLLLCRVALGKPFYQFSAVKMAHAPPGHNSVIGRPSGGLSFAEYVIYRGEQAYPE  
YLITYKINKPDT

>TNKS[A.queenslandica][XP\_019848937.1]

MDTRDHQAKIPGDSRQTSQSIEEGESADKNTGDLARLFEACKNGDIDTVQNLIQQRQSSANERDLHGRKSTPLHFAAGFGRRD  
IVKFLIEKGAHVDFRDEGGIPLHNCSFGHVDVVQLLLSNGANPN AQDNWKFSPLEAAIKGKADV CIVLLQH GADSSLLNT  
DRKAPIDLANGQAREVLLGTYRQDELEAAKVGDEQLMQILTPLNVNCHASDGRRSTPLHLAAGYNRTSIVQLLLKQGADVH  
AKDKGGLVPLHNACSYGHYEVAELLLKYGASINVTDLWQFTPLQEAASKGRSDVCSLLLAHGANPSIANCHGKTAFNLAPSEE  
FRKKLDSEYRGYQLLAAEDGGIILLKKLLSSQLLKFQHHQTLDTLLHKAVLSKSSNRQSVIDALLKRGINLNIGNKENMTPL  
ICAAKKGILEVVEQLVQRGANINHQDINGMTSLHWAVQNEHAQICRYLLSSGANPSIVNNQGQTIYQLKTSDTIQLILKNEPP  
VSQFEIEQQLLAARNSDLEILKKICTPQNVNCRDTKGRMSTPLHFAAGYNRVTVVEFLLENGADVHAKDKGGLVPLHNACSY  
GHYEVAELLVKYKANVNAMD LWKFTPLHEAAAKEKYDICKLLLKNGANVH SKNRDNLTPIDL VKDPKSDLADLLRGE PAL LDA  
AKKGEIERVKKLLTEDNVNCRDEYGRNSTPLHLAAGYNHLDVVEYLL ENKADVNAKDKGGLVPLHNASSYGHVDVASLLIRYN  
SVINATDRWNFTPLHEAAQKGRTQVCSLLI IHGADVLYKNQEGQIPLDLATADDVIALQDAMMKDIPLTIPPAEKEAKSNIV  
NKGLTAAGASLLASELV LGDGVDDKNGMVTQQRGGPAGVG DGS DKGFMSYRGGGDAPPWHNVTVKDILTELELGH LVELFER  
EQITIDILIEMN GDDLQSIGITAFGVRHRL LKRIREL VQGNNEEYPVGVT TTKPTQGTQLIELSSDDKEFIDTADLMQSTICE  
HRDDGKAGGVFDSYEILKIERIVNTKV WERYKYRRKEVAESNNNCANELM L F HGSPFVPYIVHNGFDERHAYIGGMFGAGIYF  
AEHSSKSNQYVYGIGGGNGCPEHKNRSCYTCLR KLLL CRVVLGKPV EQYTAVRIA HAPPGHHSVIGRPSAGGLNYPEYVIYRG  
EQAYPEYIITFRIKKPSATDSMSSSSSLDMSNNT

|                                         |                                                                 |     |
|-----------------------------------------|-----------------------------------------------------------------|-----|
| TNKS [A.queenslandica] [XP_019848937.1] | -----                                                           | 0   |
| TNKS [D.melanogaster] [NP_651410.1]     | -----                                                           | 0   |
| TNKS [N.vectensis] [XP_032220531.1]     | -----                                                           | 0   |
| TNKS [P.marinus] [XP_032806710.1]       | -----                                                           | 0   |
| TNKS [B.belcheri] [XP_019641281.1]      | -----                                                           | 0   |
| TNKS1 [S.salar] [XP_014017013.1]        | --MAVSRSSQQQQGN-----LLS                                         | 17  |
| TNKS1 [X.laevius] [XP_018099068.1]      | --MAAPSRSSQQQ-----QVPTAAAGQSSQPPSASPPLSP-----SSRRA-----ASCLSPPC | 46  |
| TNKS1 [G.gallus] [NP_989671.1]          | --MAAPRR-----SQ-HHHHHGPPPPPGPASPPAASPPRSPSLAPAEIG-PA            | 46  |
| TNKS1 [H.sapiens] [NP_003738.2]         | --MAASRRSQHHHHHHQQQLQPAPGASAPPPPPPLSPGLAPGTTT-ASPTASGLAPFA      | 57  |
| TNKS1 [P.abeli] [XP_024106876.1]        | --MAASRRSQHHHHHHQQQLQPAPGASAPPPPPPLSPGLAPGTTT-ASPTASGLAPFA      | 57  |
| TNKS1 [M.musculus] [EDL35446.1]         | GKMAASRRSQHHHHHHQQQLQPAPGASAPPPPPPLSPGLAPGPTT-ASPTAGGLAPFA      | 59  |
| TNKS2 [S.salar] [XP_014034742.1]        | -----                                                           | 0   |
| TNKS2 [X.laevius] [XP_018082988.1]      | -----                                                           | 0   |
| TNKS2 [G.gallus] [NP_989672.1]          | -----                                                           | 0   |
| TNKS2 [M.musculus] [NP_001157107.1]     | -----                                                           | 0   |
| TNKS2 [H.sapiens] [AAK13463.1]          | -----                                                           | 0   |
| TNKS2 [P.abeli] [XP_024109627.1]        | -----                                                           | 0   |
|                                         |                                                                 |     |
| TNKS [A.queenslandica] [XP_019848937.1] | -----                                                           | 0   |
| TNKS [D.melanogaster] [NP_651410.1]     | -----                                                           | 0   |
| TNKS [N.vectensis] [XP_032220531.1]     | -----                                                           | 0   |
| TNKS [P.marinus] [XP_032806710.1]       | -----MAARRAHLASPSSSSSLSPSSGSLDTTTAAAA-----AAAA                  | 36  |
| TNKS [B.belcheri] [XP_019641281.1]      | -----                                                           | 0   |
| TNKS1 [S.salar] [XP_014017013.1]        | PPRNGSLSVSPPGSPSLNL-----VTATLVPPDGERGCSTGMEN-PL-ASPDQTS         | 66  |
| TNKS1 [X.laevius] [XP_018099068.1]      | SPETNALSLSREGPDSEPEGEAASQPGITPRPLSPPPGEAANI-----                | 89  |
| TNKS1 [G.gallus] [NP_989671.1]          | AQRHS-----LAGPECEA-----PPDAERPAPAE-----                         | 70  |
| TNKS1 [H.sapiens] [NP_003738.2]         | SPRHG-----LALPEGDGSRDPPDRPRSPDPVDGTSCCSTTSTICTVAAAPVVPVAV       | 108 |
| TNKS1 [P.abeli] [XP_024106876.1]        | SPRHG-----LALPEGDGSRDPPDRPRSPDPVDGTSCCSTTSTICTVTAAPVVPVAV       | 108 |
| TNKS1 [M.musculus] [EDL35446.1]         | SPRHG-----LALPEGDGSRDPPDRPRSPDPVDGAVCTVA-----APAAVPA            | 102 |
| TNKS2 [S.salar] [XP_014034742.1]        | -----                                                           | 0   |
| TNKS2 [X.laevius] [XP_018082988.1]      | -----                                                           | 0   |
| TNKS2 [G.gallus] [NP_989672.1]          | -----                                                           | 0   |
| TNKS2 [M.musculus] [NP_001157107.1]     | -----                                                           | 0   |
| TNKS2 [H.sapiens] [AAK13463.1]          | -----                                                           | 0   |
| TNKS2 [P.abeli] [XP_024109627.1]        | -----                                                           | 0   |
|                                         |                                                                 |     |
| TNKS [A.queenslandica] [XP_019848937.1] | -----MDTRDHQAKIPGDSR-----Q                                      | 16  |
| TNKS [D.melanogaster] [NP_651410.1]     | -----MANS-----SR                                                | 6   |
| TNKS [N.vectensis] [XP_032220531.1]     | -----MPCQAKMASK                                                 | 10  |
| TNKS [P.marinus] [XP_032806710.1]       | TTTAAAAA-----TTTAAAMTTTAAVSATSSPST-----TAAAAAATAAAAA            | 80  |
| TNKS [B.belcheri] [XP_019641281.1]      | -----MAGRAMLSS                                                  | 10  |
| TNKS1 [S.salar] [XP_014017013.1]        | ALSSGSSTSP-----TTTTSGGSSSVSSP                                   | 91  |
| TNKS1 [X.laevius] [XP_018099068.1]      | --LSPTSSLPPAPSPSSGSSSSS-----SPSSNSLCTGGSPAESPESGIVIGVSSV        | 139 |
| TNKS1 [G.gallus] [NP_989671.1]          | --CSEGAAPGPPPGSGSSGSSASSSSSS-----SSTSSSVASSPAESPE-----          | 114 |
| TNKS1 [H.sapiens] [NP_003738.2]         | STSSAAGVAPNPAGS---GSNNPSSSSSSPSSSSSSPSSPGSSLAESPAAAGVSSSTAPL    | 165 |
| TNKS1 [P.abeli] [XP_024106876.1]        | STSSAAGVAPNPAGS---GSNNPSSSSSSPSSSSSSPSSPGSSLAESPAAAGVSSSTAPL    | 165 |
| TNKS1 [M.musculus] [EDL35446.1]         | --SAAVGVAFTPAGGGGGGNNSSASSASTPSSSSSPSSPGSSLAESPAAAGVSSSTAPL     | 160 |
| TNKS2 [S.salar] [XP_014034742.1]        | -----MA-SVARFWSANTNSKLYI-----YENTTPLMSTRQCSRVL                  | 36  |
| TNKS2 [X.laevius] [XP_018082988.1]      | -----MSGRRCAGAS                                                 | 10  |
| TNKS2 [G.gallus] [NP_989672.1]          | -----MAARRCAGGA                                                 | 10  |
| TNKS2 [M.musculus] [NP_001157107.1]     | -----MSGRRCAGGG                                                 | 10  |
| TNKS2 [H.sapiens] [AAK13463.1]          | -----MSGRRCAGGG                                                 | 10  |
| TNKS2 [P.abeli] [XP_024109627.1]        | -----MSGRRCAGGG                                                 | 10  |
|                                         |                                                                 |     |
| TNKS [A.queenslandica] [XP_019848937.1] | TSQSIEEGESADKNTGDLARLFEACKNGDIDTVQNLIQQRQSSANERDLHGRKSTPLHFA    | 76  |
| TNKS [D.melanogaster] [NP_651410.1]     | SRAILSVNLDVAMANDPLRELFEACKTGEIAKVKKLIT-P-QTVNARDTAGRKSTPLHFA    | 64  |
| TNKS [N.vectensis] [XP_032220531.1]     | KLASNPFTFLSDPDVCEGRELFEACRNGDVSRVKRLVTNN-SNVNVRDTAGRKSSPLHFA    | 69  |
| TNKS [P.marinus] [XP_032806710.1]       | GGSPGSGQDSSADGGDAGKELFEACRNGDVGRVKRLVS-P-LNVNARDTTGRKSTPLHFA    | 138 |
| TNKS [B.belcheri] [XP_019641281.1]      | -----DRIHCDSSGCRELFEACRNGDVSRVKRLIT-P-QNVNARDTAGRKSTPLHFA       | 61  |
| TNKS1 [S.salar] [XP_014017013.1]        | GGSGTTPGDD-SGIGGAFRELFEACRNGDVSRVKRLVD-S-VNVNAKDMAGRKSTPLHFA    | 148 |
| TNKS1 [X.laevius] [XP_018099068.1]      | GI---GPGDPLSAVSGAFRELFEACRNGDVSRVKRLLE-P-ANVNAKDMAGRKSTPLHFA    | 194 |
| TNKS1 [G.gallus] [NP_989671.1]          | -----AAGPSGAFRELLEACRNGDVTRVKRLVD-A-GNVNAKDMAGRKSTPLHFA         | 162 |
| TNKS1 [H.sapiens] [NP_003738.2]         | GPGAAGPGTGVPVAVSGALRELLEACRNGDVSRVKRLVD-A-ANVNAKDMAGRKSTPLHFA   | 223 |
| TNKS1 [P.abeli] [XP_024106876.1]        | GPGAAGPGTGVPVAVSGALRELLEACRNGDVSRVKRLVD-A-ANVNAKDMAGRKSSPLHFA   | 223 |
| TNKS1 [M.musculus] [EDL35446.1]         | GAGAAGLPGVPVAVSGALRELLEACRNGDVSRVKRLVD-A-ANVNAKDMAGRKSSPLHFA    | 218 |
| TNKS2 [S.salar] [XP_014034742.1]        | GLGGVFPVGDTPRSGEPNREIFEACRNGDVERVRLVR-P-ENVNSRDTAGRKSTPLHFA     | 94  |
| TNKS2 [X.laevius] [XP_018082988.1]      | GSAASHGN---IGAGGEPARELFEACRNGDVERVRLVN-S-DNVNSRDTAGRKSTPLHFA    | 66  |
| TNKS2 [G.gallus] [NP_989672.1]          | AALAEAPG---CGSAVEPARELFEACRNGDVERVRLVR-P-ENVNSRDTAGRKSSPLHFA    | 66  |
| TNKS2 [M.musculus] [NP_001157107.1]     | AACAS-AG---AEAVEPSARELFEACRNGDVERVRLVT-P-EKVNSRDTAGRKSTPLHFA    | 65  |
| TNKS2 [H.sapiens] [AAK13463.1]          | AACAS-AA---AEAVEPAARELFEACRNGDVERVRLVT-P-EKVNSRDTAGRKSTPLHFA    | 65  |
| TNKS2 [P.abeli] [XP_024109627.1]        | AACAS-AA---AEAMEPAARELFEACRNGDVERVRLVT-P-EKVNSRDTAGRKSTPLHFA    | 65  |
|                                         |                                                                 |     |
| TNKS [A.queenslandica] [XP_019848937.1] | AGFGRRDIVKFLIEKGAHVDFRDEGLIPLHNCSFQHVDVQVLLSNGANPNADNWK         | 136 |
| TNKS [D.melanogaster] [NP_651410.1]     | AGYGRREVVEFLNSGASIQACDEGLHPLHNCCSFGHAEVVRLLLKAGASPTTNDNWN       | 124 |
| TNKS [N.vectensis] [XP_032220531.1]     | AGFGRKEVVEYLLQCGADVHAMDDGGLIPLHNACSFHAEVVRIILLSHGADANARDNWN     | 129 |
| TNKS [P.marinus] [XP_032806710.1]       | AGFGRKDVVEHLLQNGANVHARDGGGLIPLHNACSFHAEVVNLLLRQGDADPNARDNWN     | 198 |
| TNKS [B.belcheri] [XP_019641281.1]      | AGFGRKDVVEHLLQNGANVHARDGGGLIPLHNACSFHAEVVTLRLRNGADPNARDNWN      | 121 |
| TNKS1 [S.salar] [XP_014017013.1]        | AGFGRKDVVDHLLQTGANVHARDGGGLIPLHNACSFHAEVVSLLLCQGDADPNARDNWN     | 208 |
| TNKS1 [X.laevius] [XP_018099068.1]      | AGFGRKDVVEHLLQTGANVHARDGGGLIPLHNACSFHAEVVTLRLCQGDADPNARDNWN     | 254 |
| TNKS1 [G.gallus] [NP_989671.1]          | AGFGRKDVVEHLLQTGANVHARDGGGLIPLHNACSFHAEVVSLLLCQGDADPNARDNWN     | 222 |
| TNKS1 [H.sapiens] [NP_003738.2]         | AGFGRKDVVEHLLQMGANVHARDGGGLIPLHNACSFHAEVVSLLLCQGDADPNARDNWN     | 283 |
| TNKS1 [P.abeli] [XP_024106876.1]        | AGFGRKDVVEHLLQMGANVHARDGGGLIPLHNACSFHAEVVSLLLCQGDADPNARDNWN     | 283 |
| TNKS1 [M.musculus] [EDL35446.1]         | AGFGRKDVVEHLLQMGANVHARDGGGLIPLHNACSFHAEVVSLLLCQGDADPNARDNWN     | 278 |
| TNKS2 [S.salar] [XP_014034742.1]        | AGFGRDQVVDYLLQNGANVHARDGGGLVSLHNACSFHGEVNVNLLLRHGADANSRDNWSY    | 154 |
| TNKS2 [X.laevius] [XP_018082988.1]      | AGFGRKDVVEHLLQSGANVHARDGGGLIPLHNACSFHAEVVSLLLRHGADPNARDNWN      | 126 |
| TNKS2 [G.gallus] [NP_989672.1]          | AGFGRKDVVEYLLQSGANVHARDGGGLIPLHNACSFHAEVVNLLLRHGADPNARDNWN      | 126 |
| TNKS2 [M.musculus] [NP_001157107.1]     | AGFGRKDVVEYLLQNGANVQARDGGGLIPLHNACSFHAEVVNLLLRHGADPNARDNWN      | 125 |
| TNKS2 [H.sapiens] [AAK13463.1]          | AGFGRKDVVEYLLQNGANVQARDGGGLIPLHNACSFHAEVVNLLLRHGADPNARDNWN      | 125 |
| TNKS2 [P.abeli] [XP_024109627.1]        | AGFGRKDVVEYLLQNGANVQARDGGGLIPLHNACSFHAEVVNLLLRHGADPNARDNWN      | 125 |
|                                         |                                                                 |     |
| TNKS [A.queenslandica] [XP_019848937.1] | SPLHEAAIKGKADVIVLLQHGADSSLLNTDRKAPIDLANGQAREVLLGTYRQDELLEAA     | 196 |
| TNKS [D.melanogaster] [NP_651410.1]     | TPLHEAASGKGVDCVCLALLQGHANHTIRNSEQKTPLELADEATRPVLTGEYRKDELLEAA   | 184 |
| TNKS [N.vectensis] [XP_032220531.1]     | TPLHEAAVKGKGVDCVCLALLQHGADPNIRNTDGKTALDVAEAAKLVLTGDYKKDELLEGA   | 189 |
| TNKS [P.marinus] [XP_032806710.1]       | TPLHEAAIKGKIDVIVLLQHGADPGIRNTDGKTALDLAEPTAKAVLTGEYKKDELLEAA     | 258 |
| TNKS [B.belcheri] [XP_019641281.1]      | TPLHEAAIKGKIDVIVLLQHGADPNIRNTDGKTALDLAEPTAKAVLTGDYKKDELLEAA     | 181 |
| TNKS1 [S.salar] [XP_014017013.1]        | TPLHEAAIKGKIDVIVLLQHGADPNIRNTDGKSALDLADPSAKAVLTGEYKKDELLEAA     | 268 |
| TNKS1 [X.laevius] [XP_018099068.1]      | TPLHEASIKGKIDVIVLLQHGADPNIRNTDGKSALDLADPSKAVLTGEYKKDELLEAA      | 314 |

|                                       |                                                                |     |
|---------------------------------------|----------------------------------------------------------------|-----|
| TNKS1[G.allus][NP_989671.1]           | TPLHEAAIKGKIDVCIIVLLQHGADPNIRNTDGSALDLADPSAEAVLTGEYKKDELLEAA   | 282 |
| TNKS1[H.sapiens][NP_003738.2]         | TPLHEAAIKGKIDVCIIVLLQHGADPNIRNTDGSALDLADPSAKAVLTGEYKKDELLEAA   | 343 |
| TNKS1[P.abelii][XP_024106876.1]       | TPLHEAAIKGKIDVCIIVLLQHGADPNIRNTDGSALDLADPSAKAVLTGEYKKDELLEAA   | 343 |
| TNKS1[M.musculus][EDL35446.1]         | TPLHEAAIKGKIDVCIIVLLQHGADPNIRNTDGSALDLADPSAKAVLTGEYKKDELLEAA   | 338 |
| TNKS2[S.salar][XP_014034742.1]        | TPLHEAAIKGSEVCIVILQHGAEPITRNTDGRALTDLAESTKAVLTGEYKKDELLEAA     | 214 |
| TNKS2[X.laevis][XP_018082988.1]       | TPLHEAAIKGKIDVCIIVLLQHGADPNIRNTDGRALTDLSDPSAKAVLTGEYKKDELLESA  | 186 |
| TNKS2[G.gallus][NP_989672.1]          | TPLHEAAIKGKTDCVIVILQHGAETPIRTNDGRALTDLADPSAKAVLTGEYKKDELLESA   | 186 |
| TNKS2[M.musculus][NP_001157107.1]     | TPLHEAAIKGKIDVCIIVLLQHGAEPTIRNTDGRALTDLADPSAKAVLTGDYKKDELLESA  | 185 |
| TNKS2[H.sapiens][AAK13463.1]          | TPLHEAAIKGKIDVCIIVLLQHGAEPTIRNTDGRALTDLADPSAKAVLTGEYKKDELLESA  | 185 |
| TNKS2[P.abelii][XP_024109627.1]       | TPLHEAAIKGKIDVCIIVLLQHGAEPTIRNTDGRALTDLADPSAKAVLTGEYKKDELLESA  | 185 |
|                                       | :*****:***:*.*.*:**: : *:: : : : : : . ** * * : *****          |     |
| TNKS[A.queenslandica][XP_019848937.1] | KVGDEQLLMQIILTPLNVNCHASDGRSRSTPLHLAGYNRTSIVQLLLKQGADVHAHKDKGGL | 256 |
| TNKS[D.melanogaster][NP_651410.1]     | RSGAEDRLALLTPLNVNCHASDGRSRSTPLHLAGYNRTSIVQLLLKQGADVHAHKDKGGL   | 244 |
| TNKS[N.vectensis][XP_032220531.1]     | RSGNEEKLMSLLTPLNVNCHASDGRKSTPLHLAGYNRVGVQLLLKHGADVHAHKDKGGL    | 249 |
| TNKS[P.marinus][XP_032806710.1]       | RSGNEEKLMSLLTPLNVNCHASDGRKSTPLHLAGYNRVRIVQLLLKHGADVHAHKDKGGL   | 318 |
| TNKS[B.belcheri][XP_019641281.1]      | RSGNEEKLMSLLTPLNVNCHASDGRKSTPLHLAGYNRVRIVQLLLKHGADVHAHKDKGGL   | 241 |
| TNKS1[S.salar][XP_014017013.1]        | RSGNEEKLMSLLTPLNVNCHASDGRKSTPLHLAGYNRVRIVQLLLKHGADVHAHKDKGGL   | 374 |
| TNKS1[X.laevis][XP_018099068.1]       | RSGNEEKLMSLLTPLNVNCHASDGRKSTPLHLAGYNRVRIVQLLLKHGADVHAHKDKGGL   | 374 |
| TNKS1[G.gallus][NP_989671.1]          | RSGNEEKLMSLLTPLNVNCHASDGRKSTPLHLAGYNRVRIVQLLLKHGADVHAHKDKGGL   | 374 |
| TNKS1[H.sapiens][NP_003738.2]         | RSGNEEKLMSLLTPLNVNCHASDGRKSTPLHLAGYNRVRIVQLLLKHGADVHAHKDKGGL   | 402 |
| TNKS1[P.abelii][XP_024106876.1]       | RSGNEEKLMSLLTPLNVNCHASDGRKSTPLHLAGYNRVRIVQLLLKHGADVHAHKDKGGL   | 343 |
| TNKS1[M.musculus][EDL35446.1]         | RSGNEEKLMSLLTPLNVNCHASDGRKSTPLHLAGYNRVRIVQLLLKHGADVHAHKDKGGL   | 403 |
| TNKS2[S.salar][XP_014034742.1]        | RSGNEEKLMSLLTPLNVNCHASDGRKSSPLHLAGYNRVKTVQLLLKHGADVHAHKDKGL    | 274 |
| TNKS2[X.laevis][XP_018082988.1]       | RSGNEEKLMSLLTPLNVNCHASDGRKSTPLHLAGYNRVRIVQLLLKHGADVHAHKDKGL    | 246 |
| TNKS2[G.gallus][NP_989672.1]          | RSGNEEKLMSLLTPLNVNCHASDGRKSTPLHLAGYNRVRIVQLLLKHGADVHAHKDKGL    | 246 |
| TNKS2[M.musculus][NP_001157107.1]     | RSGNEEKLMSLLTPLNVNCHASDGRKSTPLHLAGYNRVRIVQLLLKHGADVHAHKDKGL    | 245 |
| TNKS2[H.sapiens][AAK13463.1]          | RSGNEEKLMSLLTPLNVNCHASDGRKSTPLHLAGYNRVRIVQLLLKHGADVHAHKDKGL    | 245 |
| TNKS2[P.abelii][XP_024109627.1]       | RSGNEEKLMSLLTPLNVNCHASDGRKSTPLHLAGYNRVRIVQLLLKHGADVHAHKDKGL    | 245 |
|                                       | : * *: : *****:*:***** ***: ***** *                            |     |
| TNKS[A.queenslandica][XP_019848937.1] | VPLHNACSYGHYVEAELLKYGASINVTLDWQFTPLQEAAASKRGSDVCSLLSHGANPFI    | 316 |
| TNKS[D.melanogaster][NP_651410.1]     | VPLHNACSYGHFVDTKLLIQAGANVNADLWQFTPLHEAASKRVNVCSSLLSHGADPTL     | 304 |
| TNKS[N.vectensis][XP_032220531.1]     | VPLHNACSYGHFEVTPELLKHGASVNAMDLDWQFTPLHEAASKARVVCALLLGHGADPTL   | 309 |
| TNKS[P.marinus][XP_032806710.1]       | VPLHNACSYGHYEVTPELLKHGASVNAMDLDWQFTPLHEAASKNRVVCSSLISYGADPTL   | 378 |
| TNKS[B.belcheri][XP_019641281.1]      | VPLHNACSYGHFEVTPELLKHGASVNAMDLDWQFTPLHEAASKRSIEVCSSLISHGADPTL  | 301 |
| TNKS1[S.salar][XP_014017013.1]        | VPLHNACSYGHFEVTPELLKHGASVNAMDLDWQFTPLHEAASKNRVVCSSLLSHGADPTL   | 388 |
| TNKS1[X.laevis][XP_018099068.1]       | VPLHNACSYGHFEVTESLLKHGACVNAMDLDWQFTPLHEAASKNRVVCSSLLSHGADPTL   | 434 |
| TNKS1[G.gallus][NP_989671.1]          | VPLHNACSYGHYEVTPELLKHGACVNAMDLDWQFTPLHEAASKNRVVCSSLLSHGADPTL   | 402 |
| TNKS1[H.sapiens][NP_003738.2]         | VPLHNACSYGHYEVTPELLKHGACVNAMDLDWQFTPLHEAASKNRVVCSSLLSHGADPTL   | 463 |
| TNKS1[P.abelii][XP_024106876.1]       | VPLHNACSYGHYEVTPELLKHGACVNAMDLDWQFTPLHEAASKNRVVCSSLLSHGADPTL   | 463 |
| TNKS1[M.musculus][EDL35446.1]         | VPLHNACSYGHYEVTPELLKHGACVNAMDLDWQFTPLHEAASKNRVVCSSLLSHGADPTL   | 458 |
| TNKS2[S.salar][XP_014034742.1]        | VPLHNACSYGHYEVTDIIVKGACVNAMDLDWQFTPLHEAASKNRVVCSSLISYGADPTL    | 334 |
| TNKS2[X.laevis][XP_018082988.1]       | VPLHNACSYGHYEVTPELLKHGASVNAMDLDWQFTSLEAASKNRVVCSSLISYGADPTM    | 306 |
| TNKS2[G.gallus][NP_989672.1]          | VPLHNACSYGHYEVTPELLKHGACVNAMDLDWQFTPLHEAASKNRVVCSSLISYGADPTL   | 306 |
| TNKS2[M.musculus][NP_001157107.1]     | VPLHNACSYGHYEVTPELLKHGACVNAMDLDWQFTPLHEAASKNRVVCSSLISYGADPTL   | 305 |
| TNKS2[H.sapiens][AAK13463.1]          | VPLHNACSYGHYEVTPELLKHGACVNAMDLDWQFTPLHEAASKNRVVCSSLISYGADPTL   | 305 |
| TNKS2[P.abelii][XP_024109627.1]       | VPLHNACSYGHYEVTPELLKHGACVNAMDLDWQFTPLHEAASKNRVVCSSLISYGADPTL   | 305 |
|                                       | *****:*.:**:*.* ** ** * ** * * ** * : ** * : ** * :            |     |
| TNKS[A.queenslandica][XP_019848937.1] | ANCHGTAFNLAPSEEFRRKKLDSERYGQQLLAAREADGGIIILLKLLSSQLLKFPQHQTLD  | 376 |
| TNKS[D.melanogaster][NP_651410.1]     | LNCNKSATDAAPTRELRLERIAFYFKGHCLLDACRKCDVSRAKVLCAEVNFVHPYTGD     | 364 |
| TNKS[N.vectensis][XP_032220531.1]     | LNCNKSATDAAPTKEQLKELLESFFKGHQILEAAKGCDATAIKKLLITTETINFQHLPTLD  | 369 |
| TNKS[P.marinus][XP_032806710.1]       | LNCNKSATDLAPTSSELKERLVIEFFKGHSLLQAAREADLVTRVKHLLGLDINFKHPQTHE  | 438 |
| TNKS[B.belcheri][XP_019641281.1]      | LNCNKSATDVASTPELQEKLSIEFFKGHSLLDGARQDTMAKVKKHLLQDIVNFKPQTHD    | 361 |
| TNKS1[S.salar][XP_014017013.1]        | LNCNKSATDMAPTPELKERLTIEFFKGHSLLQAAREADLAKVKKTLALEIFSKHPQTNTE   | 441 |
| TNKS1[X.laevis][XP_018099068.1]       | VNCHGKSATDMAPTPELKERLTIEFFKGHSLLQAAREADLAKVKKTLALEIFNKQPQSHE   | 494 |
| TNKS1[G.gallus][NP_989671.1]          | VNCHGKSATDMAPTPELRELRITIEFFKGHSLLQAAREADLAKVKKTLALEIFNKQPQSHE  | 462 |
| TNKS1[H.sapiens][NP_003738.2]         | VNCHGKSATDMAPTPELRELRITIEFFKGHSLLQAAREADLAKVKKTLALEIFNKQPQSHE  | 523 |
| TNKS1[P.abelii][XP_024106876.1]       | VNCHGKSATDMAPTPELRELRITIEFFKGHSLLQAAREADLAKVKKTLALEIFNKQPQSHE  | 523 |
| TNKS1[M.musculus][EDL35446.1]         | VNCHGKSATDMAPTPELRELRITIEFFKGHSLLQAAREADLAKVKKTLALEIFNKQPQSHE  | 5   |

|                                         |                                                                                                                               |     |
|-----------------------------------------|-------------------------------------------------------------------------------------------------------------------------------|-----|
| TNKS2 [M.musculus] [NP_001157107.1]     | VNALDSLQGTSLHRAAHCGLQTCRLLSSYGCDPNIISLQGFALTQMGNNVQQLLQEG-                                                                    | 484 |
| TNKS2 [H.sapiens] [AAK13463.1]          | VNALDNLGQTSLSHRAAYCCHLQTCRLLSSYGCDPNIISLQGFALTQMGNNVQQLLQEG-                                                                  | 484 |
| TNKS2 [P.abeli] [XP_024109627.1]        | VNALDNLGQTSLSHRAAYCCHLQTCRLLSSYGCDPNIISLQGFALTQMGNNVQQLLQEG-<br>:* * * * * . . * * : . . . : * : : : . . : : *                | 484 |
|                                         |                                                                                                                               |     |
| TNKS [A.queenslandica] [XP_019848937.1] | EPVVSQFEIEQQLLEAARNSDLEILKKI--CTPQNVNCRDTKGRMSTPLHFAAGYNRVTV                                                                  | 553 |
| TNKS [D.melanogaster] [NP_651410.1]     | -----PDSETHLLEAAKAGDLDTVRRIVLNNPISVNCRLDGRHSTPLHFAAGYNRVTV                                                                    | 535 |
| TNKS [N.vectensis] [XP_032220531.1]     | ESPSFVDAEKQLLEAAKTGDLETVKNL--CTAQTVNCRLDGRHSTPLHFAAGYNRVTV                                                                    | 547 |
| TNKS [P.marinus] [XP_032806710.1]       | SLPVNSDVEHQQLLEAAKAGDLDTVKQL--CTQTQVNCRDMGRHSTPLHFAAGYNRVSV                                                                   | 615 |
| TNKS [B.belcheri] [XP_019641281.1]      | -PPSGPADECDQQLLEAAKAGDLEAVKVL--CNPHTVNCRDVNGRHSSTPLHFAAGYNRVAV                                                                | 537 |
| TNKS1 [S.salar] [XP_014017013.1]        | -VPTNSDSDVYRFLLEAAKAGDLDVQQL--CTPQNVNCRDLEGRHSTPLHFAAGYNRVAV                                                                  | 624 |
| TNKS1 [X.laev] [XP_018099068.1]         | -TPVRTSDVDYRLLLEASKAGDLDIVKQL--CSSQNVNCRDLEGRHSTPLHFAAGYNRVSV                                                                 | 670 |
| TNKS1 [G.gallus] [NP_989671.1]          | -TPVRTSDVDYRLLLEASKAGDLETVKQL--CSPQNVNCRDLEGRHSTPLHFAAGYNRVSV                                                                 | 638 |
| TNKS1 [H.sapiens] [NP_003738.2]         | -TPRTSDVDYRLLLEASKAGDLETVKQL--CSSQNVNCRDLEGRHSTPLHFAAGYNRVSV                                                                  | 699 |
| TNKS1 [P.abeli] [XP_024106876.1]        | -TPRTSDVDYRLLLEASKAGDLETVKQL--CSPQNVNCRDLEGRHSTPLHFAAGYNRVSV                                                                  | 699 |
| TNKS1 [M.musculus] [EDL35446.1]         | -TPMRTSDVDYRLLLEASKAGDLETVKQL--CSPQNVNCRDLEGRHSTPLHFAAGYNRVSV                                                                 | 694 |
| TNKS2 [S.salar] [XP_014034742.1]        | -TLGNSDSDVQQLLEASKSGDLEIVKVL--CTMQNVNCRDVEGRQSTPLHFAAGYNRVSV                                                                  | 570 |
| TNKS2 [X.laev] [XP_018082988.1]         | -LPFSNSDADSQLLEAAKAGDLDVVKVL--CTSQSVNCRDVEGRQSTPLHFAAGYNRVAV                                                                  | 542 |
| TNKS2 [G.gallus] [NP_989672.1]          | -IPLGNSDADRQLLEAAKAGDVTVKKL--CTVQSVNCRDIEGRQSTPLHFAAGYNRVSV                                                                   | 542 |
| TNKS2 [M.musculus] [NP_001157107.1]     | -ASLGHSEADRQLLEAAKAGDVTVKKL--CTVQSVNCRDIEGRQSTPLHFAAGYNRVSV                                                                   | 541 |
| TNKS2 [H.sapiens] [AAK13463.1]          | -ISLGNSEADRQLLEAAKAGDVTVKKL--CTVQSVNCRDIEGRQSTPLHFAAGYNRVSV                                                                   | 541 |
| TNKS2 [P.abeli] [XP_024109627.1]        | -ISLGNSEADRQLLEAAKAGDVTVKKL--CTVQSVNCRDIEGRQSTPLHFAAGYNRVSV<br>: : : : : * : : : : . : : : : * : : : : * : : : : *            | 541 |
|                                         |                                                                                                                               |     |
| TNKS [A.queenslandica] [XP_019848937.1] | VEFLLENGADVHAKDKGGLVPLHNACSYGHYEVAELLVKYKANVNAMDWKFTPLHEAAA                                                                   | 613 |
| TNKS [D.melanogaster] [NP_651410.1]     | VQFLLHEGAEVVAADKGGVPLHNACSYGHYEVTCELLVKHGAVNVNADLWKFTPLHEAAA                                                                  | 595 |
| TNKS [N.vectensis] [XP_032220531.1]     | VEYLLLNGADVHAKDKGGLVPLHNACSYGHYEVAELLVKHGAIVNVADLWKFTPLHEAAA                                                                  | 607 |
| TNKS [P.marinus] [XP_032806710.1]       | VEYLLQHGADVHAKDKGGLVPLHNACSYGHYEVAELLVKRGAVNVNADLWKFTPLHEAAA                                                                  | 675 |
| TNKS [B.belcheri] [XP_019641281.1]      | VEYLLQHGADVHAKDKGGLVPLHNACSYGHYEVCCELLVKHGAVNVNADLWKFTPLHEAAA                                                                 | 597 |
| TNKS1 [S.salar] [XP_014017013.1]        | VEYLLHHGADVHAKDKGGLVPLHNACSYGHYEVAELLVVRHGASVNVNADLWKFTPLHEAAA                                                                | 684 |
| TNKS1 [X.laev] [XP_018099068.1]         | VEYLLHHGADVHAKDKGGLVPLHNACSYGHYEVAELLVVRHGASVNVNADLWKFTPLHEAAA                                                                | 730 |
| TNKS1 [G.gallus] [NP_989671.1]          | VEYLLHHGADVHAKDKGGLVPLHNACSYGHYEVAELLVVRHGASVNVNADLWKFTPLHEAAA                                                                | 698 |
| TNKS1 [H.sapiens] [NP_003738.2]         | VEYLLHHGADVHAKDKGGLVPLHNACSYGHYEVAELLVVRHGASVNVNADLWKFTPLHEAAA                                                                | 759 |
| TNKS1 [P.abeli] [XP_024106876.1]        | VEYLLHHGADVHAKDKGGLVPLHNACSYGHYEVAELLVVRHGASVNVNADLWKFTPLHEAAA                                                                | 759 |
| TNKS1 [M.musculus] [EDL35446.1]         | VEYLLHHGADVHAKDKGGLVPLHNACSYGHYEVAELLVVRHGASVNVNADLWKFTPLHEAAA                                                                | 754 |
| TNKS2 [S.salar] [XP_014034742.1]        | VEYLLQHGADVHAKDKGGLVPLHNACSYGHYEVAELLVHGAVNVNADLWKFTPLHEAAA                                                                   | 630 |
| TNKS2 [X.laev] [XP_018082988.1]         | VEYLLQHGADVHAKDKGGLVPLHNACSYGHYEVTCELLVKHGAVNVNADLWKFTPLHEAAA                                                                 | 602 |
| TNKS2 [G.gallus] [NP_989672.1]          | VEYLLQHGADVHAKDKGGLVPLHNACSYGHYEVAELLVKHGAVNVNADLWKFTPLHEAAA                                                                  | 602 |
| TNKS2 [M.musculus] [NP_001157107.1]     | VEYLLQHGADVHAKDKGGLVPLHNACSYGHYEVAELLVKHGAVNVNADLWKFTPLHEAAA                                                                  | 601 |
| TNKS2 [H.sapiens] [AAK13463.1]          | VEYLLQHGADVHAKDKGGLVPLHNACSYGHYEVAELLVKHGAVNVNADLWKFTPLHEAAA                                                                  | 601 |
| TNKS2 [P.abeli] [XP_024109627.1]        | VEYLLQHGADVHAKDKGGLVPLHNACSYGHYEVAELLVKHGAVNVNADLWKFTPLHEAAA<br>* : : : : * : : : : * : : : : * : : : : * : : : : * : : : : * | 601 |
|                                         |                                                                                                                               |     |
| TNKS [A.queenslandica] [XP_019848937.1] | KEKYDICKLLKNGANVHSKNRDNLPTIDLVDKPKSADLALLRGEFALLDAAKKGEIERV                                                                   | 673 |
| TNKS [D.melanogaster] [NP_651410.1]     | RGKYDICKLLKKGADPMKKNRDGATPADLVKESDHDVAELLRGPALLDAAKKGNLAVR                                                                    | 655 |
| TNKS [N.vectensis] [XP_032220531.1]     | RGKYEICQLLLKKGADPQKNRDGDTPLDLVKEGSDVADLLRGDAALLDAAKKGNLIRI                                                                    | 667 |
| TNKS [P.marinus] [XP_032806710.1]       | RGKYEICKLLKKGADPTKKNRDGNTPLDLVKEGDTDIQDLLRGDAALLDAAKKGNLAVR                                                                   | 735 |
| TNKS [B.belcheri] [XP_019641281.1]      | RGKYEICKLLKKGADPMKKNRDGNTPLDLVRDGDGTDIQDLLRGDAALLDAAKKGNLAVR                                                                  | 657 |
| TNKS1 [S.salar] [XP_014017013.1]        | RGKYEICKLLKKGADPTKKNRDGNMPLDMVKDGDGTDIQDLLRGDAALLDAAKKGNLAVR                                                                  | 744 |
| TNKS1 [X.laev] [XP_018099068.1]         | RGKYEICKLLKKGADPTKKNRDGNTPLDLVKDGDGTDIQDLLRGDAALLDAAKKGNLAVR                                                                  | 790 |
| TNKS1 [G.gallus] [NP_989671.1]          | RGKYEICKLLKKGADPTKKNRDGNTPLDLVKEGDTDIQDLLRGDAALLDAAKKGNLAVR                                                                   | 758 |
| TNKS1 [H.sapiens] [NP_003738.2]         | RGKYEICKLLKKGADPTKKNRDGNTPLDLVKEGDTDIQDLLRGDAALLDAAKKGNLAVR                                                                   | 819 |
| TNKS1 [P.abeli] [XP_024106876.1]        | RGKYEICKLLKKGADPTKKNRDGNTPLDLVKEGDTDIQDLLRGDAALLDAAKKGNLAVR                                                                   | 819 |
| TNKS1 [M.musculus] [EDL35446.1]         | RGKYEICKLLKKGADPTKKNRDGNTPLDLVKEGDTDIQDLLRGDAALLDAAKKGNLAVR                                                                   | 814 |
| TNKS2 [S.salar] [XP_014034742.1]        | RGKYEICKLLQHGADPTKKNRDGSTPLDLVKDGDGTMDQDLLRGDAALLDAAKKGNLAVR                                                                  | 690 |
| TNKS2 [X.laev] [XP_018082988.1]         | RGKYEICKLLKKGADSTKKNRDGNTPLDLVKDGDGTDIQDLLRGDAALLDAAKKGNLAVR                                                                  | 662 |
| TNKS2 [G.gallus] [NP_989672.1]          | RGKYEICKLLQHGADPPKKNRDGNTPLDLVKDGDGTDIQDLLRGDAALLDAAKKGNLAVR                                                                  | 662 |
| TNKS2 [M.musculus] [NP_001157107.1]     | RGKYEICKLLQHGADPTKKNRDGNTPLDLVKDGDGTDIQDLLRGDAALLDAAKKGNLAVR                                                                  | 661 |
| TNKS2 [H.sapiens] [AAK13463.1]          | RGKYEICKLLQHGADPTKKNRDGNTPLDLVKDGDGTDIQDLLRGDAALLDAAKKGNLAVR                                                                  | 661 |
| TNKS2 [P.abeli] [XP_024109627.1]        | RGKYEICKLLQHGADPTKKNRDGNTPLDLVKDGDGTDIQDLLRGDAALLDAAKKGNLAVR<br>* * : : : * : : : * : : : * : : : * : : : * : : : * : : : *   | 661 |
|                                         |                                                                                                                               |     |
| TNKS [A.queenslandica] [XP_019848937.1] | KKLLTEDNVNCRDEYGRNSTPLHLAAGYNNHLDVVEYLLNKAADVNAQDKGGLVPLHNASS                                                                 | 733 |
| TNKS [D.melanogaster] [NP_651410.1]     | QRLVTPESINCRDAQGRNSTPLHLAAGYNNFCAEYLLENGADVNAQDKGGLVPLHNASS                                                                   | 715 |
| TNKS [N.vectensis] [XP_032220531.1]     | TKLATPENINCRDTQGRNSTPLHLAAGYNNHLEVAEYLLHAGADVNAQDKGGLVPLHNASS                                                                 | 727 |
| TNKS [P.marinus] [XP_032806710.1]       | QKLCSENVNCRDSQGRNSTPLHLAAGYNNLEVAEYLLHAGADVNAQDKGGLVPLHNASS                                                                   | 795 |
| TNKS [B.belcheri] [XP_019641281.1]      | QKLATPENINCRDTQGRNSTPLHLAAGYNNVLEVAEYLLHAGADVNAQDKGGLVPLHNASS                                                                 | 717 |
| TNKS1 [S.salar] [XP_014017013.1]        | QKLCSPENINCRDTQGRNSTPLHLAAGYNNLEVAEYLLHAGADVNAQDKGGLVPLHNASS                                                                  | 804 |
| TNKS1 [X.laev] [XP_018099068.1]         | QKLCTQENINCRDTQGRNSTPLHLAAGYNNLEVAEYLLHAGADVNAQDKGGLVPLHNASS                                                                  | 850 |
| TNKS1 [G.gallus] [NP_989671.1]          | QKLCTPENINCRDTQGRNSTPLHLAAGYNNLEVAEYLLHAGADVNAQDKGGLVPLHNASS                                                                  | 818 |
| TNKS1 [H.sapiens] [NP_003738.2]         | QKLCTPENINCRDTQGRNSTPLHLAAGYNNLEVAEYLLHAGADVNAQDKGGLVPLHNASS                                                                  | 879 |
| TNKS1 [P.abeli] [XP_024106876.1]        | QKLCTPENINCRDTQGRNSTPLHLAAGYNNLEVAEYLLHAGADVNAQDKGGLVPLHNASS                                                                  | 879 |
| TNKS1 [M.musculus] [EDL35446.1]         | QKLCTPENINCRDTQGRNSTPLHLAAGYNNLEVAEYLLHAGADVNAQDKGGLVPLHNASS                                                                  | 874 |
| TNKS2 [S.salar] [XP_014034742.1]        | EKLCPDNVNCRDAQGRHSTPLHLAAGYNNLEVAEYLLQHGAEVNSQDKGGLVPLHNASS                                                                   | 750 |
| TNKS2 [X.laev] [XP_018082988.1]         | KKLCTPENVNCRDTQGRHSTPLHLAAGYNNLEVAEYLLQHGADVNAQDKGGLVPLHNASS                                                                  | 722 |
| TNKS2 [G.gallus] [NP_989672.1]          | KKLCPDNVNCRDTQGRHSTPLHLAAGYNNLEVAEYLLQHGADVNAQDKGGLVPLHNASS                                                                   | 722 |
| TNKS2 [M.musculus] [NP_001157107.1]     | KKLSSPDVNCRDTQGRHSTPLHLAAGYNNLEVAEYLLQHGADVNAQDKGGLVPLHNASS                                                                   | 721 |
| TNKS2 [H.sapiens] [AAK13463.1]          | KKLSSPDVNCRDTQGRHSTPLHLAAGYNNLEVAEYLLQHGADVNAQDKGGLVPLHNASS                                                                   | 721 |
| TNKS2 [P.abeli] [XP_024109627.1]        | KKLSSPDVNCRDTQGRHSTPLHLAAGYNNLEVAEYLLQHGADVNAQDKGGLVPLHNASS<br>* : : : : * : : : * : : : * : : : * : : : * : : : * : : : *    | 721 |
|                                         |                                                                                                                               |     |
| TNKS [A.queenslandica] [XP_019848937.1] | YGHVDVASLLIRYNSVINATDRWNFTPLHEAAQKGRQTQVCSLLIHGADVYLLKNQEGQIP                                                                 | 793 |
| TNKS [D.melanogaster] [NP_651410.1]     | YGHLDIAALLIKHKTTVNATDKWFTPLHEAAQKGRQTQLCSLLLAHGADAYMKNQEGQTP                                                                  | 775 |
| TNKS [N.vectensis] [XP_032220531.1]     | YGHVDIAALLIRYNTVNATDRWFTPLHEAAQKGRQTQLCALLEAHGADPMSKNQEGQSP                                                                   | 787 |
| TNKS [P.marinus] [XP_032806710.1]       | YGHVDIAALLIKYSAVNATDKWFTPLHEAAQKGRQTQLCALLEAHGADPMSKNQEGQTP                                                                   | 855 |
| TNKS [B.belcheri] [XP_019641281.1]      | YGHVEIAALLIKYGTVCVNATDRWNFTPLHEAAQKGRQTQLCALLEAHGADPTMKNQEGQTP                                                                | 777 |
| TNKS1 [S.salar] [XP_014017013.1]        | YGHVDIAALLIKFNTCVNATDKWFTPLHEAAQKGRQTQLCALLEAHGADPTMKNQEGQTA                                                                  | 864 |
| TNKS1 [X.laev] [XP_018099068.1]         | YGHVDIAALLIKYNTCVNATDKWFTPLHEAAQKGRQTQLCALLEAHGADPTMKNQESQTP                                                                  | 910 |
| TNKS1 [G.gallus] [NP_989671.1]          | YGHVDIAALLIKYNTCVNATDKWFTPLHEAAQKGRQTQLCALLEAHGADPTMKNQEGQTP                                                                  | 878 |
| TNKS1 [H.sapiens] [NP_003738.2]         | YGHVDIAALLIKYNTCVNATDKWFTPLHEAAQKGRQTQLCALLEAHGADPTMKNQEGQTP                                                                  | 939 |
| TNKS1 [P.abeli] [XP_024106876.1]        | YGHVDIAALLIKYNTCVNATDKWFTPLHEAAQKGRQTQLCALLEAHGADPTMKNQEGQTP                                                                  | 939 |
| TNKS1 [M.musculus] [EDL35446.1]         | YGHVDIAALLIKYNTCVNATDKWFTPLHEAAQKGRQTQLCALLEAHGADPTMKNQEGQTP                                                                  | 934 |
| TNKS2 [S.salar] [XP_014034742.1]        | YGHVDVAALLIKYDACVNATDKWFTPLHEAAQKGRQTQLCALLEAHGADPALRNQEGQSP                                                                  | 810 |
| TNKS2 [X.laev] [XP_018082988.1]         | YGHVDVAALLIKYNACVNANDKWFTPLHEAAQKGRQTQLCALLEAHGADPALRNQEGQAP                                                                  | 782 |
| TNKS2 [G.gallus] [NP_989672.1]          | YGHVDVAALLIKYNACVNATDKWFTPLHEAAQKGRQTQLCALLEAHGADPTLKNQEGQTP                                                                  | 782 |
| TNKS2 [M.musculus] [NP_001157107.1]     | YGHVDVAALLIKYNACVNATDKWFTPLHEAAQKGRQTQLCALLEAHGADPTLKNQEGQTP                                                                  | 781 |
| TNKS2 [H.sapiens] [AAK13463.1]          | YGHVDVAALLIKYNACVNATDKWFTPLHEAAQKGRQTQLCALLEAHGADPTLKNQEGQTP                                                                  | 781 |
| TNKS2 [P.abeli] [XP_024109627.1]        | YGHVDVAALLIKYNACVNATDKWFTPLHEAAQKGRQTQLCALLEAHGADPTLKNQEGQTP<br>* : : : : * : : : * : : : * : : : * : : : * : : : * : : : *   | 781 |
|                                         |                                                                                                                               |     |
| TNKS [A.queenslandica] [XP_019848937.1] | LDLATADDVIALLDAMMKDIPLT-IPPAEKAESNIVN-----KG-----                                                                             | 833 |
| TNKS [D.melanogaster] [NP_651410.1]     | IELATADDVKCLLDAMATSLSQQALSASTQSLTSSSPAPDATAAAGFTSSSSSSSAILS                                                                   | 835 |



|                                       |                                                               |      |
|---------------------------------------|---------------------------------------------------------------|------|
| TNKS[N.vectensis][XP_032220531.1]     | VDLATAEDVKCLLGDMAMSLTQTTSVSTAPVAKVPAPVTAT-AGAA-----           | 831  |
| TNKS[P.marinus][XP_032806710.1]       | LDLATADDVRALLIDAMPPPEALPVTHKPPSIPTIAATSAA-ATAALALGPTPALA--SLA | 912  |
| TNKS[B.belcheri][XP_019641281.1]      | LDLATAEDVRALLIDVAMPPOQSLPAAIATATVKAASP-----                   | 913  |
| TNKS1[S.salar][XP_014017013.1]        | LDLATADDIRALLMDAMPDPDALPSCFKPQATVVVSAGS-----                  | 901  |
| TNKS1[X.laevius][XP_018099068.1]      | LDLATADDIRALLIDAMPPPEALPSCFKPQATVVSA-S-----                   | 946  |
| TNKS1[G.gallus][NP_989671.1]          | LDLATADDIRALLIDAMPPPEALPTCFKLQATVVSA-S-----                   | 914  |
| TNKS1[H.sapiens][NP_003738.2]         | LDLATADDIRALLIDAMPPPEALPTCFKPQATVVSA-S-----                   | 975  |
| TNKS1[P.abelii][XP_024106876.1]       | LDLATADDIRALLIDAMPPPEALPTCFKPQATVVSA-S-----                   | 975  |
| TNKS1[M.musculus][EDL35446.1]         | LDLATADDIRALLIDAMPPPEALPTCFKPQATVVSA-S-----                   | 970  |
| TNKS2[S.salar][XP_014034742.1]        | LDLVTVDVVRALLTAAMPSPALPGCYKQVIVSMSSPV-----                    | 847  |
| TNKS2[X.laevius][XP_018082988.1]      | LDLVTADDVRALLTAAMPPEALPTFYKQQLNVPQPS-----                     | 819  |
| TNKS2[G.gallus][NP_989672.1]          | LDLVTADDVSALLTAAMPSPALPSCYKQVIVSVQTA-----                     | 819  |
| TNKS2[M.musculus][NP_001157107.1]     | LDLVSADDVSALLTAAMPSPALPTCYKQVIVSGVRGP-----                    | 818  |
| TNKS2[H.sapiens][AAK13463.1]          | LDLVSADDVSALLTAAMPSPALPSCYKQVIVLNGVRSP-----                   | 818  |
| TNKS2[P.abelii][XP_024109627.1]       | LDLVSADDVSALLTAAMPSPALPSCYKQVIVLNGVRSP-----                   | 818  |
|                                       | ::*:.:*: ** *                                                 |      |
| TNKS[A.queenslandica][XP_019848937.1] | -----LTAAGASLL-----ASELVLDGVDKNGMVTQ----QRGGPAGV              | 869  |
| TNKS[D.melanogaster][NP_651410.1]     | PTTETVLLPTGASML-----SVP--VPLPLSSSTRISP-----AQG--              | 870  |
| TNKS[N.vectensis][XP_032220531.1]     | -----TPATGPISGMAPLSQANSS-----LLANSFAGHG--                     | 860  |
| TNKS[P.marinus][XP_032806710.1]       | P-----SPVPSGASAGAGGVPLLASPSSTPASLSAASSMDSLTGACGVAPSPVPAIGA    | 968  |
| TNKS[B.belcheri][XP_019641281.1]      | -----ISSPSTTPSSTPGVLTASSMDHLVGA-----V-GG                      | 843  |
| TNKS1[S.salar][XP_014017013.1]        | -----V-----ISPASTPSCLSAASSIDNLAG-----PLNELGAA-GT              | 933  |
| TNKS1[X.laevius][XP_018099068.1]      | -----I-----ISPSTPSCLSAASSIDNLTG-----PLAELAVG-GV               | 978  |
| TNKS1[G.gallus][NP_989671.1]          | -----L-----ISPASTPSCLSAASSIDNLTG-----PLAELAVG-GA              | 946  |
| TNKS1[H.sapiens][NP_003738.2]         | -----L-----ISPASTPSCLSAASSIDNLTG-----PLAELAVG-GA              | 1007 |
| TNKS1[P.abelii][XP_024106876.1]       | -----L-----ISPASTPSCLSAASSIDNLTG-----PLAELAVG-GA              | 1007 |
| TNKS1[M.musculus][EDL35446.1]         | -----L-----ISPASTPSCLSAASSIDNLTG-----PLTDLAVG-GA              | 1002 |
| TNKS2[S.salar][XP_014034742.1]        | -----GVVPPPSLGSSTPLSTLASRSLDNQATSTCTAFPELAL---                | 889  |
| TNKS2[X.laevius][XP_018082988.1]      | -----TTAAALSSVPLSS--PTLSAASSLDNL-----ASSFSETTSV-S             | 857  |
| TNKS2[G.gallus][NP_989672.1]          | -----SSTADPLSSVPSPP--SSLSAASSLDNL-----SGSFSELSPV-VG           | 857  |
| TNKS2[M.musculus][NP_001157107.1]     | -----GATADALSSGSPSP--SSLSAASSLDNL-----SGSFSELSAV-VS           | 856  |
| TNKS2[H.sapiens][AAK13463.1]          | -----GATADALSSGSPSP--SSLSAASSLDNL-----SGSFSELSAV-VS           | 856  |
| TNKS2[P.abelii][XP_024109627.1]       | -----GAPADALSSGSPSP--SSLSAASSLDNL-----SGSFSELSAV-VS           | 856  |
|                                       | *                                                             |      |
| TNKS[A.queenslandica][XP_019848937.1] | GDGSDKGFMSYR-----GGGDAPPVHNWTVKDLITELGHLVELFER                | 913  |
| TNKS[D.melanogaster][NP_651410.1]     | -----AEANGAEAGSSS-----DD-LLPADTITNVSGFLSSQQLHLLIELFER         | 912  |
| TNKS[N.vectensis][XP_032220531.1]     | -----DGAFSNRS-VSE---AQ---GEAVRSISAVHPLGLVDVQFLDGLQLNNLKEIFER  | 909  |
| TNKS[P.marinus][XP_032806710.1]       | GAAGDGTLLGACGVSAADGATGPADKPDARSADFEIPLDMNINMFLKGLDHLRDIPEK    | 1028 |
| TNKS[B.belcheri][XP_019641281.1]      | -----AGQGDGAIDR-----SAVEG-ESLDMTISISSFQQLGLNQLLDIFNK          | 884  |
| TNKS1[S.salar][XP_014017013.1]        | -----SGVADGATGS-----DRKEGELVMLDMNISQFLKSLGLEHLRDIPEK          | 975  |
| TNKS1[X.laevius][XP_018099068.1]      | -----SNAGDGAAGT-----ERKEGEVTVLDININQFLKSLGLEHLRDIPEK          | 1020 |
| TNKS1[G.gallus][NP_989671.1]          | -----SNTGDGAAGT-----ERKEGEVSGLDMNITQFLKSLGLEHLRDIPEK          | 988  |
| TNKS1[H.sapiens][NP_003738.2]         | -----SNAGDGAAGT-----ERKEGEVAGLDMNISQFLKSLGLEHLRDIPEK          | 1049 |
| TNKS1[P.abelii][XP_024106876.1]       | -----SNAGDGAAGT-----ERKEGEIAGLDMNISQFLKSLGLEHLRDIPEK          | 1049 |
| TNKS1[M.musculus][EDL35446.1]         | -----SNAGDGAAGA-----ERKEGEVAGLDMNISQFLKSLGLEHLRDIPEK          | 1044 |
| TNKS2[S.salar][XP_014034742.1]        | -----LGPSGAVGT-----DN--KEVPGVDLSIGQFLNNLGLEHLLIEFER           | 928  |
| TNKS2[X.laevius][XP_018082988.1]      | -----GGAEGASGL-----DK--KDEGVLDNINQFLRNLGLEHLLIDVFER           | 895  |
| TNKS2[G.gallus][NP_989672.1]          | -----TNSAEGATVL-----EK--KEVSGVDFSINQVFNRLGLEHLLIDVFER         | 897  |
| TNKS2[M.musculus][NP_001157107.1]     | -----SSAEGATGL-----QR--KEDSGIDFSITQFIRNLGLEHLLIDVFER          | 896  |
| TNKS2[H.sapiens][AAK13463.1]          | -----SSGTEGASSL-----EK--KEVPGVDFSITQFVFNRLGLEHLLIDVFER        | 896  |
| TNKS2[P.abelii][XP_024109627.1]       | -----SSGTEGTSLL-----EK--KEVPGVDFSITQFLRNLGLEHLLIDVFER         | 896  |
|                                       | : : : * : * : *                                               |      |
| TNKS[A.queenslandica][XP_019848937.1] | EQITIDILIEMGDDQLQSIGITAFGVHRHLLKRIRELVOGNNEEY--P---VGVTTTKPT  | 968  |
| TNKS[D.melanogaster][NP_651410.1]     | EQITLDILAEMGHDDLKQGVSAVGRHKLKLGIAQLRSTTIG-----NNVN            | 960  |
| TNKS[N.vectensis][XP_032220531.1]     | EQISWDVLVDMGHEELKEIGINAYGHRHKLKAVKEKISGMGLG----LGPFSST--SQV   | 962  |
| TNKS[P.marinus][XP_032806710.1]       | EQITLDVLADMGHEELKEIGINAYGHRHKLKIGVERLLGAQQGGLAYPGANPYLSYHTTA  | 1088 |
| TNKS[B.belcheri][XP_019641281.1]      | EQITLDILGEMGHEELKEIGINAYGHRHKLKIGVERLLGGTGT-----TLNPLYTLPALGS | 939  |
| TNKS1[S.salar][XP_014017013.1]        | EQITLDVLADMGHEELKEIGINAYGHRHKLKIGVERLLGGQ-----GANPLYTFHCAN    | 1029 |
| TNKS1[X.laevius][XP_018099068.1]      | EQITLDVLADMGHEELKEIGINAYGHRHKLKIGVERLLGGQ-----GTNPLYTFHCVS    | 1074 |
| TNKS1[G.gallus][NP_989671.1]          | EQITLDVLADMGHEELKEIGINAYGHRHKLKIGVERLLGGQ-----GTNPLYTFHCVS    | 1042 |
| TNKS1[H.sapiens][NP_003738.2]         | EQITLDVLADMGHEELKEIGINAYGHRHKLKIGVERLLGGQ-----GTNPLYTFHCVN    | 1103 |
| TNKS1[P.abelii][XP_024106876.1]       | EQITLDVLADMGHEELKEIGINAYGHRHKLKIGVERLLGGQ-----GTNPLYTFHCVN    | 1103 |
| TNKS1[M.musculus][EDL35446.1]         | EQITLDVLADMGHEELKEIGINAYGHRHKLKIGVERLLGGQ-----GTNPLYTFHCVN    | 1098 |
| TNKS2[S.salar][XP_014034742.1]        | EQITLDVLVEMGHKEELKEIGINAYGHRHKLKIGVERLLISGPQ-----SLNPLYTLNTAN | 982  |
| TNKS2[X.laevius][XP_018082988.1]      | EQITLDVLVEMGHKEELKEIGINAYGHRHKLKIGVERLLISGQH-----GLNPLYTLNTNS | 949  |
| TNKS2[G.gallus][NP_989672.1]          | EQITLDVLVEMGHKEELKEIGINAYGHRHKLKIGVERLLISGQ-----GLNPLYTLNTSS  | 951  |
| TNKS2[M.musculus][NP_001157107.1]     | EQITLDVLVEMGHKEELKEIGINAYGHRHKLKIGVERLLISGQ-----GLNPLYTLNTSSG | 950  |
| TNKS2[H.sapiens][AAK13463.1]          | EQITLDVLVEMGHKEELKEIGINAYGHRHKLKIGVERLLISGQ-----GLNPLYTLNTSG  | 950  |
| TNKS2[P.abelii][XP_024109627.1]       | EQITLDVLVEMGHKEELKEIGINAYGHRHKLKIGVERLLISGQ-----GLNPLYTLNTSG  | 950  |
|                                       | ***: *: *. :.:.:*: *: * *:.* : *                              |      |
| TNKS[A.queenslandica][XP_019848937.1] | QGTQLIELSSDDKEFIDTADLMQSTICEHRDDGKAGGVFDSYEILKIERIVNTKWERYK   | 1028 |
| TNKS[D.melanogaster][NP_651410.1]     | LCTLLVDLLPDDKEFVAVEEEMQATIREHRDNGQAGGYFTRYNIIRVQKVNKRLWERYA   | 1020 |
| TNKS[N.vectensis][XP_032220531.1]     | QGSVIQELSMVDKDFASVADQMSTIREHRDNGAGGVFTSYTILKIERIVNTKLWERYV    | 1022 |
| TNKS[P.marinus][XP_032806710.1]       | QGTLLIDLPPDDKEYQSVDEEMQSTIREHKDGGQAGGVFNRYNVIKIQKVNKRLWERYT   | 1148 |
| TNKS[B.belcheri][XP_019641281.1]      | HGTILTDLSPDDKEYQSVDEEVQSTIREHKDGGQAGGVFNRYNVIKIQKVNKRLWERYV   | 999  |
| TNKS1[S.salar][XP_014017013.1]        | QGTVLIDLAPDDKEQSVDEEEMQSTIREHRDGGNAGGVFSRYNIKIQKVVNKLRLERYT   | 1089 |
| TNKS1[X.laevius][XP_018099068.1]      | QGTVLDDLADDDKEYQSVDEEEMQNSIREHRDGGNAGGVFNRYNVIKIQKVVNKLRLERFC | 1134 |
| TNKS1[G.gallus][NP_989671.1]          | QGTILLDLAPDDKEYQSVDEEEMQSTIREHRDGGNAGGVFNRYNVIKIQKVVNKLRLERFC | 1102 |
| TNKS1[H.sapiens][NP_003738.2]         | QGTILLDLAPDDKEYQSVDEEEMQSTIREHRDGGNAGGVFNRYNVIKIQKVVNKLRLERFC | 1163 |
| TNKS1[P.abelii][XP_024106876.1]       | QGTILLDLAPDDKEYQSVDEEEMQSTIREHRDGGNAGGVFNRYNVIKIQKVVNKLRLERFC | 1163 |
| TNKS1[M.musculus][EDL35446.1]         | QGTILLDLAPDDKEYQSVDEEEMQSTIREHRDGGNAGGVFNRYNVIKIQKVVNKLRLERFC | 1158 |
| TNKS2[S.salar][XP_014034742.1]        | SGTILLDLVSDDDKEFQVVEELQSTIREHRDGGLAGGVFNRYNVIKIQKVCNKLWERYT   | 1042 |
| TNKS2[X.laevius][XP_018082988.1]      | SGTILLDLAPDDKEFQVVEEEMQSTIREHRDGGHAGGVFTKYNIILKIQKVCNKLWERYT  | 1009 |
| TNKS2[G.gallus][NP_989672.1]          | SGTILLDLSSDDKEFQSVDEEEMQSTVREHRDGGHAGGVFNRYNVIKIQKVCNKLWERYT  | 1011 |
| TNKS2[M.musculus][NP_001157107.1]     | SGTILLDLSPDDKEFQSVDEEEMQSTVREHRDGGHAGGVFNRYNVIKIQKVCNKLWERYT  | 1010 |
| TNKS2[H.sapiens][AAK13463.1]          | SGTILLDLSPDDKEFQSVDEEEMQSTVREHRDGGHAGGVFNRYNVIKIQKVCNKLWERYT  | 1010 |
| TNKS2[P.abelii][XP_024109627.1]       | SGTILLDLSPDDKEFQSVDEEEMQSTVREHRDGGHAGGVFNRYNVIKIQKVCNKLWERYT  | 1010 |
|                                       | : : * * : : * : * : * : * : * : * : * : * : * : * : *         |      |
| TNKS[A.queenslandica][XP_019848937.1] | YRRKEVAESNNNCANELMLFHGSPFVPIYVHNGFDERHAYIGGMFGAGIYFAEHSKSNQ   | 1088 |
| TNKS[D.melanogaster][NP_651410.1]     | HRRQEIAEENFLQSNRMLFHGSPFINAIVQRGFDERHAYIGGMFGAGIYFAEHSKSNQ    | 1080 |
| TNKS[N.vectensis][XP_032220531.1]     | YRRREIADSNHNHNERMLFHGSPFINAIVQKQDQQRHAYIGGMFGAGIYFAENS KSNQ   | 1082 |
| TNKS[P.marinus][XP_032806710.1]       | HRRKEVTEENHNHNERMLFHGSPFINAIIKNGFDERHAYIGGMFGAGIYFAENS KSNQ   | 1208 |
| TNKS[B.belcheri][XP_019641281.1]      | HRRKEVSEENHNQSNRMLFHGSPFINAIIKNGFDERHAYIGGMFGAGIYFAENS KSNQ   | 1059 |
| TNKS1[S.salar][XP_014017013.1]        | HRQKEISDENHNHNERMLFHGSPFINAIIKNGFDERHAYIGGMFGAGIYFAENS KSNQ   | 1149 |
| TNKS1[X.laevius][XP_018099068.1]      | HRQKEVSEENHNHNERMLFHGSPFINAIIKNGFDERHAYIGGMFGAGIYFAENS KSNQ   | 1194 |
| TNKS1[G.gallus][NP_989671.1]          | HRQKEVSEENHNHNERMLFHGSPFINAIIKNGFDERHAYIGGMFGAGIYFAENS KSNQ   | 1162 |
| TNKS1[H.sapiens][NP_003738.2]         | HRQKEVSEENHNHNERMLFHGSPFINAIIKNGFDERHAYIGGMFGAGIYFAENS KSNQ   | 1223 |

|                                          |                                                                 |      |
|------------------------------------------|-----------------------------------------------------------------|------|
| TNKS1 [P. abelii] [XP_024106876.1]       | HRQKEVSEENNHNHNERMLFHGSPFFNAI IHKGFDERHAYI IGMGFGAGIYFAENSSKSNQ | 1223 |
| TNKS1 [M. musculus] [EDL35446.1]         | HRQKEVSEENNHNHNERMLFHGSPFFNAI IHKGFDERHAYI IGMGFGAGIYFAENSSKSNQ | 1218 |
| TNKS2 [S. salar] [XP_014034742.1]        | HRKKEVSEENNHNHNERMLFHGSPFFNAI IHKGFDERHAYI IGMGFGAGIYFAENSSKSNQ | 1102 |
| TNKS2 [X. laevis] [XP_018082988.1]       | HRQKEVTEENNHNHNERMLFHGSPFFNAI IHKGFDERHAYI IGMGFGAGIYFAENSSKSNQ | 1069 |
| TNKS2 [G. gallus] [NP_989672.1]          | HRKKEVSEENNHNHNERMLFHGSPFFNAI IHKGFDERHAYI IGMGFGAGIYFAENSSKSNQ | 1071 |
| TNKS2 [M. musculus] [NP_001157107.1]     | HRKKEVSEENNHNHNERMLFHGSPFFNAI IHKGFDERHAYI IGMGFGAGIYFAENSSKSNQ | 1070 |
| TNKS2 [H. sapiens] [AAK13463.1]          | HRKKEVSEENNHNHNERMLFHGSPFFNAI IHKGFDERHAYI IGMGFGAGIYFAENSSKSNQ | 1070 |
| TNKS2 [P. abelii] [XP_024109627.1]       | HRKKEVSEENNHNHNERMLFHGSPFFNAI IHKGFDERHAYI IGMGFGAGIYFAENSSKSNQ | 1070 |
|                                          | ***** ** ***** ** ***** ** ***** ** ***** ** *****              |      |
| TNKS [A. queenslandica] [XP_019848937.1] | VYVIGGGNGCPEHKNRSCYICLRKLLLCRVVLGKFPVQYTVAVTAHAPGGHSHVIGRPS     | 1148 |
| TNKS [D. melanogaster] [NP_651410.1]     | VYVIGGGGICGCPSHKDKSCYVCPRQLLLCRVALGKSFLOYSAMKMAHAPPGGHSHVIGRPS  | 1140 |
| TNKS [N. vectensis] [XP_032220531.1]     | VYVIGGGGCGCPTHKDRSCYICRQMLLLCRVALGKFPFQFSYAVKMAHAPPGGHSHVIGRPS  | 1142 |
| TNKS [P. marinus] [XP_032806710.1]       | VYVIGGGTGCPVHKDRSCYICQRQMLFCRVTLGKSFLOFSAMKMAHSPGGHSHVIGRPS     | 1268 |
| TNKS [B. belcheri] [XP_019641281.1]      | VYVIGGGTGCPICHKDRSCYICQRQMLFCRVTLGKSFLOFSAMKMAHAPPGGHSHVIGRPS   | 1119 |
| TNKS1 [S. salar] [XP_014017013.1]        | VYVIGGGTGCPCTHKDRSCYICHRQMLFCRVTLGKSFLOFSAMKMAHAPPGGHSHVIGRPS   | 1209 |
| TNKS1 [X. laevis] [XP_018099068.1]       | VYVIGGGTGCPCTHKDRSCYICHRQMLFCRVTLGKSFLOFSAMKMAHAPPGGHSHVIGRPS   | 1254 |
| TNKS1 [G. gallus] [NP_989671.1]          | VYVIGGGTGCPCTHKDRSCYICHRQMLFCRVTLGKSFLOFSAMKMAHAPPGGHSHVIGRPS   | 1222 |
| TNKS1 [H. sapiens] [NP_003738.2]         | VYVIGGGTGCPCTHKDRSCYICHRQMLFCRVTLGKSFLOFSAMKMAHAPPGGHSHVIGRPS   | 1283 |
| TNKS1 [P. abelii] [XP_024106876.1]       | VYVIGGGTGCPCTHKDRSCYICHRQMLFCRVTLGKSFLOFSAMKMAHAPPGGHSHVIGRPS   | 1283 |
| TNKS1 [M. musculus] [EDL35446.1]         | VYVIGGGTGCPCTHKDRSCYICHRQMLFCRVTLGKSFLOFSAMKMAHAPPGGHSHVIGRPS   | 1278 |
| TNKS2 [S. salar] [XP_014034742.1]        | VYVIGGGTGCPCLHKDRSCYVCRRHLLFCRVTLGKSFLOFSAMKMAHSPGGHSHVIGRPS    | 1162 |
| TNKS2 [X. laevis] [XP_018082988.1]       | VYVIGGGTGCPICHKDRSCYICVRHQLLFCRVTLGKSFLOFSAMKMAHSPGGHSHVIGRPS   | 1129 |
| TNKS2 [G. gallus] [NP_989672.1]          | VYVIGGGTGCPICHKDRSCYICVRHQLLFCRVTLGKSFLOFSAMKMAHSPGGHSHVIGRPS   | 1131 |
| TNKS2 [M. musculus] [NP_001157107.1]     | VYVIGGGTGCPICHKDRSCYICVRHQLLFCRVTLGKSFLOFSAMKMAHSPGGHSHVIGRPS   | 1130 |
| TNKS2 [H. sapiens] [AAK13463.1]          | VYVIGGGTGCPVHKDRSCYICVRHQLLFCRVTLGKSFLOFSAMKMAHSPGGHSHVIGRPS    | 1130 |
| TNKS2 [P. abelii] [XP_024109627.1]       | VYVIGGGTGCPVHKDRSCYICVRHQLLFCRVTLGKSFLOFSAMKMAHSPGGHSHVIGRPS    | 1130 |
|                                          | ***** ** ***:*** * ***:***.*** * .*::::*.**:****.* ** *         |      |
| TNKS [A. queenslandica] [XP_019848937.1] | AGGLNYPPEYVIYRGEQAYPEYIITFRIKKPSATDSMSSSSSLDMSNNNT              | 1196 |
| TNKS [D. melanogaster] [NP_651410.1]     | AGGLHNFAYVYRGEQSPYELITYQIVKPDSSSGTEDTR----                      | 1181 |
| TNKS [N. vectensis] [XP_032220531.1]     | SGGLSFAEYVIYRGEQAYPEYLITYKINKPDT-----                           | 1174 |
| TNKS [P. marinus] [XP_032806710.1]       | VNGLAFAYEYVIYRGEQAYPEYLITYQILKPECTPDLTSAAGQKS----               | 1312 |
| TNKS [B. belcheri] [XP_019641281.1]      | VNGLNFAEYVIYRGEQAFPEYLITYQIVKPEAPSPADQK-----                    | 1162 |
| TNKS1 [S. salar] [XP_014017013.1]        | VNGLAYAEYVIYRGEQAYPEYLITYQILKPESATSAAGBDQKS----                 | 1253 |
| TNKS1 [X. laevis] [XP_018099068.1]       | VNGLAYAEYVIYRGEQAYPEYLITYQIMKPEAPSTLQAATAEQKT----               | 1298 |
| TNKS1 [G. gallus] [NP_989671.1]          | VNGLAYAEYVIYRGEQAYPEYLITYQIVKPEAPSTGTAAEQKT----                 | 1266 |
| TNKS1 [H. sapiens] [NP_003738.2]         | VNGLAYAEYVIYRGEQAYPEYLITYQIMKPEAPSTATAAEQKT----                 | 1327 |
| TNKS1 [P. abelii] [XP_024106876.1]       | VNGLAYAEYVIYRGEQAYPEYLITYQIMKPEAPSTATAAEQKT----                 | 1327 |
| TNKS1 [M. musculus] [EDL35446.1]         | VNGLAYAEYVIYRGEQAYPEYLITYQIMKPEAPSTATAAEQKT----                 | 1322 |
| TNKS2 [S. salar] [XP_014034742.1]        | VNGLSLAEYVIYRGEQAYPEYLITYQILKPDASVDG-----                       | 1198 |
| TNKS2 [X. laevis] [XP_018082988.1]       | VNGLALAEYVIYRGEQAYPEYLITYQIMKPEAVAEG-----                       | 1165 |
| TNKS2 [G. gallus] [NP_989672.1]          | VNGLALAEYVIYRGEQAYPEYLITYQIVKPEATTEA-----                       | 1167 |
| TNKS2 [M. musculus] [NP_001157107.1]     | VNGLALAEYVIYRGEQAYPEYLITYQIVIRPEGMVDG-----                      | 1166 |
| TNKS2 [H. sapiens] [AAK13463.1]          | VNGLALAEYVIYRGEQAYPEYLITYQIMRPEGMVDG-----                       | 1166 |
| TNKS2 [P. abelii] [XP_024109627.1]       | VNGLALAEYVIYRGEQAYPEYLITYQIMRPEGMVDG-----                       | 1166 |
|                                          | ..** *****:****:***:***: ** *                                   |      |
