# Supplementary material for: An Evolutionary Perspective on the Origin, Conservation and Binding Partner Acquisition of Tankyrases
Source: MDPI journal article supplement (doi:10.3390/biom12111688), 2022-11-15
Supplement: s1 [file s1]

# PARP6

## Sequences :

>NP\_001310451.1 protein mono-ADP-ribosyltransferase PARP6 isoform 1 [Homo sapiens]  
MDIKGQFWNDSDSGDNESEEFLYGVQGSCAADLYRHPQLDADIEAVKEIYSENSVSIREYGTIDDDVID  
LHNISFLDEEVSTAWKVLRTPEIVLRLRFSLSQYLDGPEPSIEVFQPSNKEGFGGLGLQKKILGMFTSQ  
QWKHLSNDFLKTQQEKRHSWFKASGTIKKFRAGLSIFSPIPKSPSPFPIQDSMLKGKLGVPPELRVGRLMN  
RSISCTMKNPKVEVFQYPPSPQAGLLCPQHVLGPPPARTSPLVSGHCKNIPITLEYGFVLQIMKYAEQRIP  
TLNEYCVVCDQHVFNQGSMLKPAVCTREL CVFSFYTLGVMSGAAEEVATGAEEVDLLVAMCRAALES  
PRKSIIFEPYPSVVDPTDKPTLAFNPKKNYERLQKALDSVMSIREMTQGSYLEIKKQMDKLDPLAHPLLQW  
IISNRSRHIVKLP LSR LKFMHTSHQFLLSSPPAKEARFRTAKKLYGSTFAFHGSHIENWHSILRNLGLVN  
ASYTKLQLHGAAYGKGIYLSPISSISFGYSGMGKGQHRMPSKDELVQRYNRMNTIPQTRS IQSRFLQSRN  
LNCIALCEVITSKDLQKHGNIWVCPVSDHVCTRFFVYEDGQVGDANINTQDPKIQKEIMRVIGTQVYTN

>XP\_024087899.1 poly [ADP-ribose] polymerase 6 isoform X2 [Pongo abelii]  
MDIKGQFWNDSDSGDNESEEFLYGVQGSCAADLYRHPQLDADIEAVKEIYSENSVSIREYGTIDDDVID  
LHNISFLDEEVSTAWKVLRTPEIVLRLRFSLSQYLDGPEPSIEVFQPSNKEGFGGLGLQKKILGMFTSQ  
QWKHLSNDFLKTQQEKRHSWFKASGTIKKFRAGLSIFSPIPKSPSPFPIQDSMLKGKLGVPPELRVGRLMN  
RSISCTMKNPKVEVFQYPPSPQAGLLCPQHVLGPPPARTSPLVSGHCKNIPITLEYGFVLQIMKYAEQRIP  
TLNEYCVVCDQHVFNQGSMLKPAVCTREL CVFSFYTLGVMSGAAEEVATGAEEVDLLVAMCRAALES  
PRKSIIFEPYPSVVDPTDKPTLAFNPKKNYERLQKALDSVMSIREMTQGSYLEIKKQMDKLDPLAHPLLQW  
IISNRSRHIVKLP LSR LKFMHTSHQFLLSSPPAKEARFRTAKKLYGSTFAFHGSHIENWHSILRNLGLVN  
ASYTKLQLHGAAYGKGIYLSPISSISFGYSGMGKGQHRMPSKDELVQRYNRMNTIPQTRS IQSRFLQSRN  
LNCIALCEVITSKDLQKHGNIWVCPVSDHVCTRFFVYEDGQVGDANINTQDPKIQKEIMRVIGTQVYTN

>NP\_001192168.1 protein mono-ADP-ribosyltransferase PARP6 isoform 1 [Mus musculus]  
MDIKGQFWNDSDSGDNESEEFLYGVQGSCAADLYRHPQLDADIEAVKEIYSENSVSIREYGTIDDDVID  
LHNISFLDEEVSTAWKVLRTPEIVLRLRFSLSQYLDGPEPSIEVFQPSNKEGFGGLGLQKKILCMFTSQ  
QWKHLSNDFLKTQQEKRHSWFKASGTIKKFRAGLSIFSPIPKSPSPFPIQDSMLKGKLGVPPELRVGRLMN  
RSISCTMKNPKVEVFQYPPSPQAGLLCPQHVLGPPPARTSPLVSGHCKNIPITLEYGFVLQIMKYAEQRIP  
TLNEYCVVCDQHVFNQGSMLKPAVCTREL CVFSFYTLGVMSGAAEEVATGAEEVDLLVAMCRAALES  
PRKSIIFEPYPSVVDPTDKPTLAFNPKKNYERLQKALDSVMSIREMTQGSYLEIKKQMDKLDPLAHPLLQW  
IISNRSRHIVKLP LSR LKFMHTSHQFLLSSPPAKEARFRTAKKLYGSTFAFHGSHIENWHSILRNLGLVN  
ASYTKLQLHGAAYGKGIYLSPISSISFGYSGMGKGQHRMPSKDELVQRYNRMNTIPQTRS IQSRFLQSRN  
LNCIALCEVITSKDLQKHGNIWVCPVSDHVCTRFFVYEDGQVGDANINTQDPKIQKEIMRVIGTQVYTN

>XP\_015134546.2 protein mono-ADP-ribosyltransferase PARP6 isoform X9 [Gallus gallus]  
MGTRQGAARPHSRHGADGRDGSFEGVPAVTSPPARRCRATEARGPDVKARWPPARPAAMRRQGRGQA  
AGSAREMDLKGQHWTTDDSDGDNSEEFLYGVQGTCAADLYRHPQLDADIEAVKEIYSENAVSVREYGTID  
DVIDLDLHNISFLDEEVATAMKVLRTPEIVLRLRFSLSQYLDGPEPSIEVFQPSNKEGFGGLGLQKKILG  
MFTSQWKHLSNDFLKTQQEKRHSWFKTSGTIKKFRAGLSIFSPIPKSPSPFPIQDSMLKGKLGVAPEVRV  
NRLMNRVSCTVRNPKGEVFGYTPSTQAGVAFNVLVGHCKNVPITLEYGFVLQIMKYAEQRIP TLNEYC  
VVCDEQHVFNQGSMLKPAVCTREL CVFSFYTLGVMSGAAEEVATGAEEVDLLVAMCRAALES  
PRKSIIFEPYPSVVDNDPKPTLAFNPKKNYERLQKALDSVMSIREMTQGSYLEIKKQMDKLDPLAHPLLQW  
IISNRSRHIVKLP LSR LKFMHTSHQFLLSSPPAKEARFRTAKKLYGSTFAFHGSHIENWHSILRNLGLVN  
ASYTKLQLHGAAYGKGIYLSPISSISFGYSGMGKGQHRMPSKDELVQRYNRMNTIPQTRS IQSRFLQSRN  
LNCIALCEVITSKDLQKHGNIWVCPVSDHVCTRFFVYEDGQVGDANINTQDPKIQKEIMRVIGTQVYTN

>XP\_041444306.1 protein mono-ADP-ribosyltransferase PARP6 isoform X2 [Xenopus laevis]  
MDIKGHNWPEEDSDGDNECEFLYGVQGTCCADLYRHPQLDADIEAVKEIYSENAVSVREYGTIDDDVID  
LHNIGFLDEEVATAMKVLRTPEIVLRLRFSLSQYLDGPEPTIDVFQPSNRDAFGLGILQKKIVSLFSSH  
QWRYLSNEVLRSQEERRLRVLKRVSGSIKFRAGLSIFSVPVKSPSPFPVQDVSVRSGLTGSDLRSLGTS  
DLRGPRLMNRVSCTLRNPKSELYGSHNPTQPLSSIQVSGHCKNVPITLEYGFVLQIMKYAEQRLPTLNE  
YCVVCDQHVFNQGSMLKPAVCTREL CVFSFYTLGVMSGAAEEVATGAEEVGLLVAMCRAALES  
PRKSIIFEPYPSVVDNDPKPTLAFNPKKNYERLQKALDSVMSIREMTQGSYLEIKKQMDKLDPLAHPLLQW  
IISNRSRHIVKLP LSR LKFMHTSHQFLLSSPPAKEARFRTAKKLYGSTFAFHGSHIENWHSILRNLGLVN  
ASYTKLQLHGAAYGKGIYLSPISSISFGYSGMGKGQHRMPSKDELVQRYNRMNTIPQTRCLQSRFLQSRN  
LNCIALCEVITSKDLQKHGNIWVCPVSDHVCTRFFVYEDGQVGDANINTQDPKIQKEIMRVIGTQVYSG

>XP\_014030859.1 protein mono-ADP-ribosyltransferase PARP6 isoform X4 [Salmo salar]  
MDIKGQSWTDEESDGENESEQFLYGIQGSAAADLYRHPQLDADIEAVKDIYTSADVSVREYGTIDDDVID  
LQNTNISFLDEEVATAMKVLRTPEIILRLRFSLSQYLDGPEPSVEVFQPSNKEGFGSLGLQKKILSTFTSQ  
QWKHLSNEFLKAQQEKRHSWFKAGGTIKKFRAGLSIFSPIPKSPSYPLIQDTVLVKGKLSVPELRVTRLMN  
RSISCTMKNPKGELFSYPNQSQTAVAPARAQAQITTRQLRIELFFSSQAGGHCKNIPITLEYGFVLQIMKY  
SEQRIP TLNEYCVVCDQHVFNQGSMLKPAVCTREL CVFSFYTLGVMSGAAEEVATGAEEVDLLVAMCRA  
ALES  
PRKSIIFEPYPSVVDNDPKPTLAFNPKKNYERLQKALDSVMSIREMTQGSYLEIKKQMDKLDPLA  
HPLLQW  
IISNRSRHIVKLP LSR LKFMHTSHQFLLSSPPAKEARFRTAKKLYGSTFAFHGSHIENWHSILRNLGLVN  
ASYTKLQLHGAAYGKGIYLSPISSISFGYSGMGKGQHRMPTKDELVQRYNRMNTIPQSRPIQS  
RFLQSRNLNCIALCEVITSKDLQKHGNIWVCPVSDHVCTRFFVYEDGQVGDANINTQEPKVIQKEIMRVI  
GTQIYSS

>XP\_032806551.1 protein mono-ADP-ribosyltransferase PARP6-like isoform X1 [Petromyzon marinus]  
MDQDLSAPKWTGEESDGETSEDEFPCGVQVQVADGETHRHPQLDADIESVREKYGDGAQVQIREYGAIDDVA  
VDLHINVGFLDEEIAATAMKVMRTEAVVLR LHFSLSQYLDGPEPSVDVFQPSNKDSFGIGLQKKVLKAFV  
SQQWKHLSNDCLQSQSHSKRLNLLKSSRNAKLRSP LLSHLHRSPSFLPHQDGGGRKRNLEQNGSSQQ  
GNATKTLPLIEHGFQVDTMLYGEQRIPTLNEFCVVCDEPHVFQMGPMKPAVCAARELCVFAFQTLCVMTQ  
AAAEVATGPEVVDLLAMCRSALES  
PRKSIIFDPYPSVVDNDPKALAFNPKKNYERLQKALDSIMSVR  
EMTQGSYLDIKKQMDKQDLSLAHPLLQW  
IISNRSRHIVKLSRQLKFMHTPHQFLLSSPPAKEARFRAA  
KKLYGSFSAFHGSHIENWHSILRNLGLVN  
ASYTKLQLHGAAYGKGIYLSPISSISFGYSGMGKGQHRMESK  
EKVLQNCNRVNTTPIQIKTMQSRFLQSRNLNCIALCEVITSKDLQKHGNIWCPMSDHVCTRFFVYEDGQ  
VGDANINTQDHHQVQAEILRLGMQSVSL

>XP\_019614591.1 PREDICTED: poly [ADP-ribose] polymerase 6-like isoform X5 [Branchiostoma belcheri]  
MHPQLDNDIKSVQRFGAHAINTRIFSSIDDVDAELNIDMSFLDEEIAKAWKNRQEPVIRLHLSFSQY  
LDANEPPKVEVFQPSNKETFGLMQIQKIMETFLSKEWKDLNDRVTAICVPLRPI SARSSSHSHKGASSH  
GKKLQLHEMSKSPQSLSVSSWKVRPKKIDHRHVAQLVDMGFTVEMARNALFMTNRNLEEAINLLLTQPE  
SCRPAAGGGAGSSSFRGTWTSALFLAPSAQQHVVLPAFPSQPLKPATIGDELHLVPCSTERGRTAKTI  
PLEYGFFLAQCLIIYARNRIPTLNEYCVVCDPHIFQNGAMKLPVVCEREVCVFAFQQLGVMRGAADIAT  
GAEEVDLLAMVAKASSHSPRKDLILDPFPSPVVDPDNAKEMVLSPKKKNYDRVNAILDSLMSVREMTQASV  
DMKKQDKDKYAWPFLSWISSNRSRHIVKLPESRRIKFMHTPHQFLLSSPPAKEQAFREAKRQHGSFL  
AFHGSHIENWHSILRNLGLINASGTQHQLHGAAYGSGIYLSPNSSVSFGYSCMGHSHKAARNKALLVTPH  
RKGFLQGCALGCTNQTTAASEKTKGKENTKRFLESDNLTCIALCEVISHKELRKHNNIWWPNPDHVCT  
RFFVYEDGQVGDSDVDTQEKEHQKELIRAIGNMTATD

>XP\_019849465.1 PREDICTED: poly [ADP-ribose] polymerase 6-like [Amphimedon queenslandica]  
MLPEDRQLKSMQDTKYQFLLLSSPPAKEMAFQQAOKLKHGSTFAFHGSHIENWHSIMRKLGLINASGTQYQLN  
GAYAGSGIYLSPHAMTSFGYSNRYDDPSQKQSGSGKQLETLAGKLNITCIALCEVTSKELRRSGDIW  
VCSNSEHVWTRFFVYDTNSATSEASSLHETNRAFKQEIIMHVAVALAKMKLNDSTASKTK

## Alignment

|                                 |                                                                |     |
|---------------------------------|----------------------------------------------------------------|-----|
| XP_019849465.1[A.queenslandica] | -----                                                          | 0   |
| XP_019614591.1[B.belcheri]      | -----                                                          | 0   |
| XP_032806551.1[P.marinus]       | -----                                                          | 0   |
| XP_041444306.1[X.laevis]        | -----                                                          | 0   |
| XP_014030859.1[S.salar]         | -----                                                          | 0   |
| XP_015134546.2[G.gallus]        | MGTQRGAAARPHSRHAGDRDGSFGFAGVPAVTSPPARRCRATEARGPDVKARMPPARPA    | 60  |
| NP_001310451.1[H.sapiens]       | -----                                                          | 0   |
| XP_024087899.1[P.abelii]        | -----                                                          | 0   |
| NP_001192168.1[M.musculus]      | -----                                                          | 0   |
|                                 |                                                                |     |
| XP_019849465.1[A.queenslandica] | -----                                                          | 0   |
| XP_019614591.1[B.belcheri]      | -----MHPQLNDNIK                                                | 10  |
| XP_032806551.1[P.marinus]       | -----MDQDLSAPKWTGEESDGETESDEFFCGVQVNADGETHRHPQLDADIE           | 47  |
| XP_041444306.1[X.laevis]        | -----MDIKGHNWPEEDSDGDNCEGFYLGVGQTCADLYRHPQLDADIE               | 45  |
| XP_014030859.1[S.salar]         | -----MDIKGQSWTDEESDGENESEGFYLGIGQSCAADLYRHPQLDADIE             | 45  |
| XP_015134546.2[G.gallus]        | AWRRQGRGQAAGSAEMDLKGQYWTDDSDGDNSEEFYLGVGQTCADLYRHPQLDADIE      | 120 |
| NP_001310451.1[H.sapiens]       | -----MDIKGFWNDDSDGDNSEEFYLGVGQSCAADLYRHPQLDADIE                | 45  |
| XP_024087899.1[P.abelii]        | -----MDIKGFWNDDSDGDNSEEFYLGVGQSCAADLYRHPQLDADIE                | 45  |
| NP_001192168.1[M.musculus]      | -----MDIKGFWNDDSDGDNSEEFYLGVGQSCAADLYRHPQLDADIE                | 45  |
|                                 |                                                                |     |
| XP_019849465.1[A.queenslandica] | -----                                                          | 0   |
| XP_019614591.1[B.belcheri]      | SVEQRFGAAHINTRIFSSIDDVDAELNIDMSFLDEEIAKAWKVNREQPIVIRLHLSFSQY   | 70  |
| XP_032806551.1[P.marinus]       | SVREKYGQDAVQIREYGAIDDVAVDLHNIVGFLDEEATAWKVMRTEAVVLRHLHFSLSQY   | 107 |
| XP_041444306.1[X.laevis]        | AVKEIYSENNAVSVREYGTIDVDIDLHINIGFLDEEVATAWKVIRTEPIVLRFRSLSQY    | 105 |
| XP_014030859.1[S.salar]         | AVKDIYTSNAVSVREYGTIDVDIDLQINISFLDEEVATAWKVIRTEPIVLRFRSLSQY     | 105 |
| XP_015134546.2[G.gallus]        | AVKEIYSENNAVSVREYGTIDVDIDLHVNISFLDEEVATAWKVIRTEPIVLRFRSLSQY    | 180 |
| NP_001310451.1[H.sapiens]       | AVKEIYSENSVSIREYGTIDVDIDLHINISFLDEEVSTAWKVLRTPEIVLRFRSLSQY     | 105 |
| XP_024087899.1[P.abelii]        | AVKEIYSENSVSIREYGTIDVDIDLHINISFLDEEVSTAWKVLRTPEIVLRFRSLSQY     | 105 |
| NP_001192168.1[M.musculus]      | AVKEIYSENSVSIREYGTIDVDIDLHINISFLDEEVSTAWKVLRTPEIVLRFRSLSQY     | 105 |
|                                 |                                                                |     |
| XP_019849465.1[A.queenslandica] | -----                                                          | 0   |
| XP_019614591.1[B.belcheri]      | LDANEPPKVEVFQPSNKEFTFLGMQIQKIMETFLSKWEKDLSDNRVTAICVPLRPISARS   | 130 |
| XP_032806551.1[P.marinus]       | LDGPE-PSVDVFQPSNKDSFGIGLQKVKLKAFFVSQQWKHLNSDCLQSQHSEKRLNL----  | 162 |
| XP_041444306.1[X.laevis]        | LDGPE-PTIDVFQPSNRDAFGLGQLKKIVLSFSSHQWRYLSNEVLRSQQERRLRW----    | 160 |
| XP_014030859.1[S.salar]         | LDGPE-PSVEVFQPSNKEGFSGLGLKKILSTFTSQQWKHLNSEFLKAQQEKKRHSW----   | 160 |
| XP_015134546.2[G.gallus]        | LDGPE-PSIEVFQPSNKEGFGGLGLQKKILGMFTSQQWKHLNSDFLKTQQEKKRHSW----  | 235 |
| NP_001310451.1[H.sapiens]       | LDGPE-PSIEVFQPSNKEGFGGLGLQKKILGMFTSQQWKHLNSDFLKTQQEKKRHSW----  | 160 |
| XP_024087899.1[P.abelii]        | LDGPE-PSIEVFQPSNKEGFGGLGLQKKILGMFTSQQWKHLNSDFLKTQQEKKRHSW----  | 160 |
| NP_001192168.1[M.musculus]      | LDGPE-PSIEVFQPSNKEGFGGLGLQKKILCMFTSQQWKHLNSDFLKTQQEKKRHSW----  | 160 |
|                                 |                                                                |     |
| XP_019849465.1[A.queenslandica] | -----                                                          | 0   |
| XP_019614591.1[B.belcheri]      | SHSHKGASSHGKLLQLHEMSKSFQSLVSSWK---VRPVYKIH-D-----RHAQVLVDMG    | 181 |
| XP_032806551.1[P.marinus]       | ----LKSSRN-----A-----KKLRSPLSLLSHLRSFSLPHQDGGGGRKRN-----       | 201 |
| XP_041444306.1[X.laevis]        | ----LRVSGS-----I-----KKFRAGLSIFSFPVKPSFPGVQDSVVRSGLTGSDLRSG    | 206 |
| XP_014030859.1[S.salar]         | ----FKAGGT-----I-----KKFRAGLSIFSFPKSPSYPLIQDTVLKGGKLS-----     | 199 |
| XP_015134546.2[G.gallus]        | ----FKTSGT-----I-----KKFRAGLSIFSFPKSPSFVPIQDSVLKGGKLG-----     | 274 |
| NP_001310451.1[H.sapiens]       | ----FKASGT-----I-----KKFRAGLSIFSFPKSPSFPFIQDSMLKGGKLG-----     | 199 |
| XP_024087899.1[P.abelii]        | ----FKASGT-----I-----KKFRAGLSIFSFPKSPSFPFIQDSMLKGGKLG-----     | 199 |
| NP_001192168.1[M.musculus]      | ----FKASGT-----I-----KKFRAGLSIFSFPKSPSFPFIQDSMLKGGKLG-----     | 199 |
|                                 |                                                                |     |
| XP_019849465.1[A.queenslandica] | -----                                                          | 0   |
| XP_019614591.1[B.belcheri]      | FTVEMARNALFMTNRNLEEAINLLLTQPESCRPGAGGGGAGSSSFRGTWTSALFLAPSVAQ  | 241 |
| XP_032806551.1[P.marinus]       | LTGSDLR-----GPRLMNRSVSCTLRNPKS-----ELYGSHNPTT                  | 201 |
| XP_041444306.1[X.laevis]        | --VPELR-----VTRLMNRSISCTMKNPKG-----ELFSYPPNSQ                  | 232 |
| XP_014030859.1[S.salar]         | ----APEVR-----VNRLMNRSVSCVTKNPKG-----EVFGYTPSTQ                | 307 |
| XP_015134546.2[G.gallus]        | --VPELR-----VGRLMNRSISCTMKNPKV-----EVFGYPPSPQ                  | 232 |
| NP_001310451.1[H.sapiens]       | --VPELR-----VGRLMNRSISCTMKNPKV-----EVFGYPPSPQ                  | 232 |
| XP_024087899.1[P.abelii]        | --VPELR-----VGRLMNRSISCTMKNPKV-----EVFGYPPSPQ                  | 232 |
| NP_001192168.1[M.musculus]      | --VPELR-----VGRLMNRSISCTMKNPKV-----EVFGYPPSPQ                  | 232 |
|                                 |                                                                |     |
| XP_019849465.1[A.queenslandica] | -----                                                          | 0   |
| XP_019614591.1[B.belcheri]      | QHQQVVLPARFSQPLKPATI-GDELHLVPCSTERGRKTAKTIPGLEYGFLAQCLYARNRIP  | 300 |
| XP_032806551.1[P.marinus]       | -----LEQNGSSQQGNATKTLPILEHGLVQTMLYGEQRIP                       | 237 |
| XP_041444306.1[X.laevis]        | --Q-----PLSSIQVSGHCKTVPTELEYGFLVQIMKYAEQRIP                    | 276 |
| XP_014030859.1[S.salar]         | --TVAVPAA-----RAPAQITTRQLIELFFSSQAGGHCKNIPTELEYGFLVQIMKYSEQRIP | 286 |
| XP_015134546.2[G.gallus]        | --AGVA-----PFNIVGGHCKNVPTLEYGFLVQIMKYAEQRIP                    | 344 |
| NP_001310451.1[H.sapiens]       | --AGLLCPQ-----HVG-----LPPPARTSPLVSGHCKNIPTELEYGFLVQIMKYAEQRIP  | 280 |
| XP_024087899.1[P.abelii]        | --AGLLCPQ-----HVG-----LPPPARTSPLVSGHCKNIPTELEYGFLVQIMKYAEQRIP  | 280 |
| NP_001192168.1[M.musculus]      | --AGLLCPQ-----HVG-----LPPPARTSPLVSGHCKNIPTELEYGFLVQIMKYAEQRIP  | 280 |
|                                 |                                                                |     |
| XP_019849465.1[A.queenslandica] | -----                                                          | 0   |
| XP_019614591.1[B.belcheri]      | TLNEYCVVCDEPHIFQNGAMLKPVVCCEREVCVFAFQQLGVMRGAADDIATGAEVVDLLLA  | 360 |
| XP_032806551.1[P.marinus]       | TLNEFCVVCDEPHVFQNGPMLKPAVCARELCVFAQTQLGVMTGAAAEVATGPEVVDLLLA   | 297 |
| XP_041444306.1[X.laevis]        | TLNEYCVVCDEQHVFNQASMLKPAVCTRELCVFSFYTLGVMSGAAEEVATGAEVVGLLVA   | 336 |
| XP_014030859.1[S.salar]         | TLNEYCVVCDEQHVFNQGSMLKPAVCTRELCVFSFYTLGVMSGAAEEVATGAEVVDLLVA   | 346 |
| XP_015134546.2[G.gallus]        | TLNEYCVVCDEQHVFNQGSMLKPAVCTRELCVFSFYTLGVMSGAAEEVATGAEVVDLLVA   | 404 |
| NP_001310451.1[H.sapiens]       | TLNEYCVVCDEQHVFNQGSMLKPAVCTRELCVFSFYTLGVMSGAAEEVATGAEVVDLLVA   | 340 |
| XP_024087899.1[P.abelii]        | TLNEYCVVCDEQHVFNQGSMLKPAVCTRELCVFSFYTLGVMSGAAEEVATGAEVVDLLVA   | 340 |
| NP_001192168.1[M.musculus]      | TLNEYCVVCDEQHVFNQGSMLKPAVCTRELCVFSFYTLGVMSGAAEEVATGAEVVDLLVA   | 340 |
|                                 |                                                                |     |
| XP_019849465.1[A.queenslandica] | -----                                                          | 0   |
| XP_019614591.1[B.belcheri]      | MVKASSHSPRKDLILDPPFSSVVDPNAKEMVLSPKKKNYDRVNAI LDSLMSVREMTQAS-  | 419 |
| XP_032806551.1[P.marinus]       | MCRSALESPRKSIIFDPYPSSVVDPNDPKALAFNPKKKNYERLQALDLSMSVREMTQGSY   | 357 |
| XP_041444306.1[X.laevis]        | MCRAALESPRKSIIFEPYPSSVVDPNDPKTLAFNPKKKNYERLQKALDSVMSIREMTQGSY  | 396 |
| XP_014030859.1[S.salar]         | MCRAALESPRKSIIFEPYPSSVVDPNDPKTLAFNPKKKNYERLQKALDSVMSIREMTQGSY  | 406 |
| XP_015134546.2[G.gallus]        | MCRAALESPRKSIIFEPYPSSVVDPNDPKTLAFNPKKKNYERLQKALDSVMSIREMTQGSY  | 464 |
| NP_001310451.1[H.sapiens]       | MCRAALESPRKSIIFEPYPSSVVDPTDPKTLAFNPKKKNYERLQKALDSVMSIREMTQGSY  | 400 |
| XP_024087899.1[P.abelii]        | MCRAALESPRKSIIFEPYPSSVVDPTDPKTLAFNPKKKNYERLQKALDSVMSIREMTQGSY  | 400 |
| NP_001192168.1[M.musculus]      | MCRAALESPRKSIIFEPYPSSVVDPTDPKTLAFNPKKKNYERLQKALDSVMSIREMTQGSY  | 400 |
|                                 |                                                                |     |
| XP_019849465.1[A.queenslandica] | -----MLPEDRQLKSMDTKYQFLLLSSPPAKEMAF                            | 30  |
| XP_019614591.1[B.belcheri]      | VDMMKQLDKKDYAWPFLSWISSNRSHIVKLPESSRIKFMHTPHQFLLSSPPAKEQAF      | 479 |
| XP_032806551.1[P.marinus]       | LDIKKQMDKQDLSLAHPLLQWISSNRSHIVKLQSSRQLKFMHTPHQFLLSSPPAKEARF    | 417 |
| XP_041444306.1[X.laevis]        | LEIKKQMDKDLPLAHLPLQWISSNRSHIVKLPLSR-LKFMHTSHQFLLSSPPAKEARF     | 455 |
| XP_014030859.1[S.salar]         | LEIKKQMDKDLPLAHLPLQWISSNRSHIVKLPLSRQLKFMHTSHQFLLSSPPAKEARF     | 466 |
| XP_015134546.2[G.gallus]        | LEIKKQMDKDLPLAHLPLQWISSNRSHIVKLPLSR-LKFMHTSHQFLLSSPPAKEARF     | 523 |
| NP_001310451.1[H.sapiens]       | LEIKKQMDKDLPLAHLPLQWISSNRSHIVKLPLSR-LKFMHTSHQFLLSSPPAKEARF     | 459 |
| XP_024087899.1[P.abelii]        | LEIKKQMDKDLPLAHLPLQWISSNRSHIVKLPLSR-LKFMHTSHQFLLSSPPAKEARF     | 459 |
| NP_001192168.1[M.musculus]      | LEIKKQMDKDLPLAHLPLQWISSNRSHIVKLPLSR-LKFMHTSHQFLLSSPPAKEARF     | 459 |
|                                 |                                                                |     |
| XP_019849465.1[A.queenslandica] | QQAKLKHGSTFAPFHGSSSIENWHSIMRKLINASGTKYQLNGAAYGSGIYLSPHAMTSFGY  | 90  |

|                                |                                                                                                         |     |
|--------------------------------|---------------------------------------------------------------------------------------------------------|-----|
| XP_019614591.1[B.belcheri]     | REAKRQHGSLFAPFHGSHIENWHWSILRLHGLINASGTQHQLHGAAYGSGIYLSPNSVSFGY                                          | 539 |
| XP_032806551.1[P.marinus]      | RAAKKLGYGSFAPFHGSHIENWHWSILRLNGVLNASYTKYQLHLGAAYGKGIYLPSSISIFGY                                         | 539 |
| XP_041444306.1[X.laevis]       | RTAKKLYGSTFAFHGSHIENWHWSILRLNGVLNASYTKYQLHLGAAYGKGIYLPSSISIFGY                                          | 539 |
| XP_0414430859.1[S.salar]       | RTAKKLYGSTFAFHGSHIENWHWSVLRNLGNLNASYTKYQLHLGAAYGKGIYLPSSISIFGY                                          | 526 |
| XP_015134546.2[G.gallus]       | RTAKKLYGSTFAFHGSHIENWHWSILRLNGVLNASYTKYQLHLGAAYGKGIYLPSSISIFGY                                          | 583 |
| NP_001310451.1[H.sapiens]      | RTAKKLYGSTFAFHGSHIENWHWSILRLNGVLNASYTKYQLHLGAAYGKGIYLPSSISIFGY                                          | 519 |
| XP_024087899.1[P.abelii]       | RTAKKLYGSTFAFHGSHIENWHWSILRLNGVLNASYTKYQLHLGAAYGKGIYLPSSISIFGY                                          | 519 |
| NP_001192168.1[M.musculus]     | RTAKKLYGSTFAFHGSHIENWHWSILRLNGVLNASYTKYQLHLGAAYGKGIYLPSSISIFGY<br>: ** :***** :*:**:*** ***:***** : *** | 519 |
| XP_019849465.1[A.quenslandica] | SNRYIYDPSSQKK-----GSSGKQLETLAGKLNI                                                                      | 119 |
| XP_019614591.1[B.belcheri]     | SCMGHSGHKAARNKALLVTPPHRGFLQGCKALCTGNTTAASEKGTKKKTRFRLESNDL                                              | 599 |
| XP_032806551.1[P.marinus]      | SGMGKGQRHMESEKLV-----QCNRVNITP-----QIKTMGRSFLQSRLN                                                      | 519 |
| XP_041444306.1[X.laevis]       | SGMGKGQRHMFSDLV-----QRYNRMTIP-----QTKCLSRFLQSRLN                                                        | 557 |
| XP_0414430859.1[S.salar]       | SGMGKGQRHMPTDKELV-----QRYNRMTIP-----QSRPIQSRFLQSRLN                                                     | 568 |
| XP_015134546.2[G.gallus]       | SGMGKGQRHMRPKDELV-----QRYNRMTIP-----QTSRIQSRFLQSRLN                                                     | 625 |
| NP_001310451.1[H.sapiens]      | SGMGKGQRHMRPKDELV-----QRYNRMTIP-----QTSRIQSRFLQSRLN                                                     | 621 |
| XP_024087899.1[P.abelii]       | SGMGKGQRHMRPKDELV-----QRYNRMTIP-----QTSRIQSRFLQSRLN                                                     | 618 |
| NP_001192168.1[M.musculus]     | SGMGKGQRHMRPKDELV-----QRYNRMTIP-----QTSRIQSRFLQSRLN<br>* . : . . . *                                    | 561 |
| XP_019849465.1[A.quenslandica] | TCIALCEVVTSKELRRSGDIWVCNSEHVTVRFVFVYTNSATSEASSLHTEINRAFKQE                                              | 179 |
| XP_019614591.1[B.belcheri]     | TICALCEVITSKELRKHNIVVFNPDHCVTRFFVFVEDGVGDGMSV---DTQEKYQAE                                               | 656 |
| XP_032806551.1[P.marinus]      | NCIALCEVITSKDLQKHGINVWCPMSDHCVTTRFFVFVEDGVGDGDI---NTQDPKIQAE                                            | 616 |
| XP_041444306.1[X.laevis]       | NCIALCEVITSKDLQKHGINVWCPVDHCVTRFFVFVEDGVGDGDI---NTQDPKIQAE                                              | 574 |
| XP_0414430859.1[S.salar]       | NCIALCEVITSKDLQKHGINVWCPVDHCVTRFFVFVEDGVGDGDI---NTQEPKVIQE                                              | 625 |
| XP_015134546.2[G.gallus]       | NCIALCEVITSKDLQKHGINVWCPVDHCVTRFFVFVEDGVGDGDI---NTQDPKIQKE                                              | 682 |
| NP_001310451.1[H.sapiens]      | NCIALCEVITSKDLQKHGINVWCPVDHCVTRFFVFVEDGVGDGDI---NTQDPKIQKE                                              | 618 |
| XP_024087899.1[P.abelii]       | NCIALCEVITSKDLQKHGINVWCPVDHCVTRFFVFVEDGVGDGDI---NTQDPKIQKE                                              | 618 |
| NP_001192168.1[M.musculus]     | NCIALCEVITSKDLQKHGINVWCPVDHCVTRFFVFVEDGVGDGDI---NTQDPKIQKE<br>***** :*:**:*** ***:***** : . . . *       | 618 |
| XP_019849465.1[A.quenslandica] | IMHAVALKAMKMLDNSASTKT 201                                                                               |     |
| XP_019614591.1[B.belcheri]     | ILRAIGNTADT----- 668                                                                                    |     |
| XP_032806551.1[P.marinus]      | ILRLGMQSVSL----- 588                                                                                    |     |
| XP_041444306.1[X.laevis]       | IMRVIGTQVYS----- 626                                                                                    |     |
| XP_0414430859.1[S.salar]       | IMRVIGTQIYS----- 637                                                                                    |     |
| XP_015134546.2[G.gallus]       | IMRVIGTQVYTN----- 694                                                                                   |     |
| NP_001310451.1[H.sapiens]      | IMRVIGTQVYTN----- 630                                                                                   |     |
| XP_024087899.1[P.abelii]       | IMRVIGTQVYTN----- 630                                                                                   |     |
| NP_001192168.1[M.musculus]     | IMRVIGTQVYTN----- 630<br>**:                                                                            |     |

### Percent identity matrix:

```
#
#
# Percent Identity Matrix - created by Clustal2.1
#
#
1: XP_019849465.1[A.queenslandica] 100.00 52.13 48.66 50.54 50.80 50.54 50.54 50.54 50.54
2: XP_019614591.1[B.belcheri] 52.13 100.00 59.15 54.22 56.35 56.79 55.90 55.90 55.90
3: XP_032806551.1[P.marinus] 48.66 59.15 100.00 73.58 74.57 74.66 74.02 74.02 74.02
4: XP_041444306.1[X.laevis] 50.54 54.22 73.58 100.00 84.60 87.50 86.55 86.55 86.39
5: XP_014030859.1[S.salar] 50.80 56.35 74.57 84.60 100.00 90.47 89.21 89.21 89.05
6: XP_015134546.2[G.gallus] 50.54 56.79 74.66 87.50 90.47 100.00 95.15 95.15 94.83
7: NP_001310451.1[H.sapiens] 50.54 55.90 74.02 86.55 89.21 95.15 100.00 100.00 99.68
8: XP_024087899.1[P.abelii] 50.54 55.90 74.02 86.55 89.21 95.15 100.00 100.00 99.68
9: NP_001192168.1[M.musculus] 50.54 55.90 74.02 86.39 89.05 94.83 99.68 99.68 100.00
```
