# Supplementary material for: An Evolutionary Perspective on the Origin, Conservation and Binding Partner Acquisition of Tankyrases
Source: MDPI journal article supplement (doi:10.3390/biom12111688), 2022-11-15
Supplement: s1 [file s1]

# Mcl-1

## Homo sapiens:

>Q07820 MCL1 HUMAN Induced myeloid leukemia cell differentiation protein Mcl-1 OS=Homo sapiens OX=9606 GN=MCL1 PE=1 SV=3  
MFLGKRNAVIGLNLVYCGGAGLGAGGGGATRPGGRLLA TEKEASARREIGGEGAGAVIGGS  
AGASPPSTLTTPDSRRVA**SPPTGAE**VPDVTATPARLLFFAPTRRAAPLEEMEA PAADAIM  
SPEEELDGYEPEPLGKRPAVLPLELVLGSEGNNTSTDGSLPSTPPPAAEEDELYRQSL  
EIIISRYLREQATGAKDTPKPMGRSGATSRKALETLRVVG DG VQRNHETAFQGMRLKLDIKNE  
DDVKLSLRVMIHVFS DGV TNWGRIVTLISFGAFVAKHLKTINQESCIEPLAESITDVLVR  
TKRDWLVKQRGWDGFVEFFHVEDLEGGIRNVLLAFAGVAGVGAGLAYLIR

## Pongo abelii:

>XP\_002810320.1 induced myeloid leukemia cell differentiation protein Mcl-1 isoform X1 [Pongo abelii]  
MFLGKRNAVIGLNLVYCGGAGLGAGSGATPPGGRLLA TEKEASARREIGGEGAGAVIGSAGASPPSTLT  
PDSRRVA**SPPTGAE**VPDVTATPARLFFAPTRRAAPLEEMEA PAADAIMSPEEELDGYEPEPLGKRPAV  
LPLELVLGSEGNNTSTDGSLPSTPPPAAEEDELYRQSL EIIISRYLREQATGAKDTPKLRSGATCRKAL  
ETLRVRVG DG VQRNHETAFQGMRLKLDIKNE DDVKLSLRVMHVFS DGV TNWGRIVTLISFGAFVAKHLKT  
INQESCIEPLAESITDVLVTRTKRDWLVKQRGWDGFVEFFHVEDLEGGIRNVLLAFAGVAGVGAGLAYLIR

## Mus musculus:

>NP\_032588.1 induced myeloid leukemia cell differentiation protein Mcl-1 homolog [Mus musculus]  
MFLGKRNAVIGLNLVYCGGASLGAGGSGPAGARLVAEEAKARREGGGEAALLPGARVVA**SPFVQAE**DPDV  
TASAERLRHKSPGLLAVPPEEMAASAAAAIVSPEEELDGCEPEAIGKRPAVLPLLERVSEAAKSSGADGS  
LPSTPPPPEEEEDDLVRQSL EIIISRYLREQATGSKDSKPLGEAGAAGRRALETLRVRVG DG VQRNHETAFQ  
GMRLKLDIKNEG DVKFSRVMHVFKDGV TNWGRIVTLISFGAFVAKHLKSVNQESFIEPLAETITDVLV  
RTRRDWLVKQRGWDGFVEFFHVQDLEGGIRNVLLAFAGVAGVGAGLAYLIR

## Gallus gallus:

>NP\_001244212.2 induced myeloid leukemia cell differentiation protein Mcl-1 isoform 1 [Gallus gallus]  
MFAVKRNAVIGFNLVYCGGGSPGLVPASPAGEQTTPPPAAAAAPAAAAATVAEVPRLIGSAGLWAAAGRAEA  
**FPAPFSGSQA**PHAPIGSAARAPFDSTSRFVALWSPEEELDGCEPESERGPGGDSLPGTTPPELFDLIPD  
ELRQESLELILNLVREAGAEAFVQVKLEPGLLQCGPFCRASSAVMEKALETLRARVGDGVNQKHELAFQ  
GMLRKLILIKKEDDLQAVCEVAHVNDGV TNWGRIVTLISFGAFVAKHLKSIINQEK CITSLAGIITDALV  
SSKREWLMSQGGWEGVDFVRVEDLESSIRNVLMFAFAGVAGLGA SLAYMIRKWRSS

## Xenopus laevis:

>NP\_001131055.1 MCL1, BCL2 family apoptosis regulator L homeolog [Xenopus laevis]  
MMHQSVIAKQRPSTSFILIPQCFYCSGGSSSEKTL SARGASPWDPDMDTHRPO LNLGFGNNNGSLPCSQED  
ELDEIDMNGSQGSTSPDPSPVC PKDGLYMDTQQ LILAFYRVYSGEESGELEASCLLQHG VHHKALETL LRL  
VGGEIIEKH HMAFTGMLQRLSIHSREDLQKLS E V PALVFNDGV TNWGRIVTVISFGAFVAKHLKSLNLED  
CIGVLA EFTQFLMMSKKDWIIQEKGWDGFVDFFHIEDYESGLKT VLMAFSSVAVLGAGLAYMIR

## Salmo salar:

>NP\_001117034.1 myeloid leukemia differentiation protein homologue [Salmo salar]  
MSLSNSITRATTMTLHFQNGGSSYLADDARPLY YFQGAGACAGASPKSKVDLGNGTGDTPPRPPTTLGVN  
VVKSNGLDNHLSDRSNDDSLPCTPQMASEC GP ELSNCPSGDEVLEH DTRQLIENFLG DYTGLSQFRWQT  
SKPLTTMKRVVEDVIAKHRYAYNGMVAKLDLDDRCDDMGVINSVAKTFMSD GITNWGRIASLVAFGA VVS  
QHLKERGRGHGVELVQG EIAKYL LDDQS DWLKNNAWNGFVEFFHVQDPESSVRNTLLAFAGVAGIGATL  
AMFIR

## Petromyzon marinus:

>XP\_032829936.1 anti-apoptotic protein NR13-like [Petromyzon marinus]  
MVA DGT HAGI FAADRLQQQAGSGPPNSPSPRDNDTATAPAIGEACGAPPTTPATSADSVSHSAADIQAT  
RSGGSRPYND DALTVETANFITGYMAHLTPTEQPPHQQLSSASELLKSMGDSLLEQHRAAISGMVSRVE  
AQTDFPELRGSALGVAREMFS DGHMNGRVVALVVF CALLVKRLKASGR L SDAEARAVADEVA AFLVSSR  
KAMFVQQGGWNGFVREFERETPDSALKNTLMAVAGFGAMTALAALGV RKLISGFC

## Branchiostoma belcheri:

>XP\_019634801.1 PREDICTED: bcl-2-related ovarian killer protein homolog B-like [Branchiostoma belcheri]  
MDLTRRESAVEQPLPSLDEEHEHDS DGEPESVDSRREETGGVPARVWTF LREFSVRDWLRNAKDAALD  
LRQYVLDPETIKGLWSQAAPTEKSVI DESRQLRDYINGRLKKS NLRGRLPDAKRRPT EVSSQLQKM  
GGELERMYPHLYRDVSRQINITLSSESIETSFETVANELFSTGITWARI VAMFAVAGAFVDCVHQGHP  
MFTRRLVDVVDFTRKLSAWLVQEGGWYGLVKHFRGDGRTHMFWAISGIAAIGLAATFFVIDP

## Drosophila melanogaster:

No homolog found.

## Hydra vulgaris:

>XP\_001626412.1 apoptosis regulator Bcl-2 [Nematostella vectensis]  
MPTREGYDNANAVARKMKTP EEKIAHELA KDFIGYKLGKGR LNTKSALILRKLSNQIENKH EFLRNM  
CDRLDIQHNAPETFKQVADEIFGDGINWGRIVVLYTFAGK VAKYQENQLDNAENVATWVGNYVASKSD  
WVKKAGGWEAFNEQFKVDQVEHEKFWWNSLLC TTLGLGSLA AVL YMKSS

## Nematostella vectensis:

>XP\_047134887.1 apoptosis regulator BAX [Hydra vulgaris]  
MGPFPAQPKPTIENNQPLNEEAPSLD TVDGRPQRFNNGGTRLRNQPRNVVNVNNSN QVIESTPELFTQF  
LVNRNENDNI EVPEELRNRSRNGTVNKEVAHCLKRIGDDL VNNHQLNHLISSIQVTRETAYKTFFDVASH  
VFADGTINWGRVTVLFYFAYKLAIQV VNLPLVEIVIGMWQKFVTDRLAQWIAERG GWNAVQEYFGSTTV  
QFVGVFAGFLFAYILTKVFRR

## Amphimedon queenslandica:

>XP\_003386733.1 PREDICTED: bcl-2-like protein 1 [Amphimedon queenslandica]

MALVVPAPVQHQQYHHKNSPKRRGSPVQDDKFYEETRNLITACIESASGKEPLSVKLSEEALRIVGMVQQ  
TLKADEIFFRKLCEELELTATNLFSKLMDVWGMFSDGQVNI GRLLALLAFQCQCVTVYCRSVGLPSIESS  
VPHWASIFISTTHLKDWITNRGGWDAISKELMLRTSATNSSTSSRTASNGGWLQWGVSGIALAISVFDAL  
HNSS

## Alignment

|                                |                                                                 |     |
|--------------------------------|-----------------------------------------------------------------|-----|
| XP_019634801.1[B.belcheri]     | -----                                                           | 0   |
| XP_00386733.1[A.queenslandica] | -----                                                           | 0   |
| XP_047134887.1[H.vulgaris]     | -----                                                           | 0   |
| XP_001626412.1[N.vectensis]    | -----                                                           | 0   |
| XP_032829936.1[P.marinus]      | -----                                                           | 0   |
| NP_001117034.1[S.salar]        | MSL-----SNSITRATTMTLHFQNGSGS-----                               | 23  |
| NP_001131055.1[X.laevis]       | MMHQSVIAKQRPSTSLIPICQFYCSGGGSEKT-----                           | 33  |
| NP_001244212.2[G.gallus]       | -----MFAVKRNAVIGFNLYCGGSGPGLVPAS--PAGEQTTPPAAAAFAAAATVAE        | 50  |
| NP_032588.1[M.musculus]        | -----MFGLRRNAVIGLNLYCGGASLGAGGGS--PAGARLVAAEA--KARR-EGGGE       | 47  |
| Q07820[H.sapiens]              | -----MFGLKRNAVIGLNLYCGGAGLGAGSGGATPGRRLATEKEASARREIGGGE         | 52  |
| XP_002810320.1[P.abelii]       | -----MFGLKRNAVIGLNLYCGGAGLGAGSGGATPPGGRLLATEKEASARREIGGGE       | 52  |
|                                |                                                                 |     |
| XP_019634801.1[B.belcheri]     | -----MD                                                         | 2   |
| XP_00386733.1[A.queenslandica] | -----                                                           | 0   |
| XP_047134887.1[H.vulgaris]     | -----                                                           | 0   |
| XP_001626412.1[N.vectensis]    | -----                                                           | 0   |
| XP_032829936.1[P.marinus]      | -----MV                                                         | 2   |
| NP_001117034.1[S.salar]        | -----YLADDARPLYFQGAGAT-----                                     | 41  |
| NP_001131055.1[X.laevis]       | -----L                                                          | 34  |
| NP_001244212.2[G.gallus]       | VPRPLIGSAGLW-----AAAGRAEAPKAPTGSGAA-----PHAPI-GSAAARRAPPPDS--   | 97  |
| NP_032588.1[M.musculus]        | -----AALLPGARVVAKPPFVVALDPDVTASAERRLHKSPLGLLAVPPEEMA            | 93  |
| Q07820[H.sapiens]              | AGAVIGGSAGASPPSTLTPDSRRVAKPPFVVALVDPVTATPARLLFFAFPTRAAPLEEME    | 112 |
| XP_002810320.1[P.abelii]       | AGAVIGGSAGASPPSTLTPDSRRVAKPPFVVALVDPVTATPARLLFFAFPTRAAPLEEME    | 112 |
|                                |                                                                 |     |
| XP_019634801.1[B.belcheri]     | LT-----RRESAVEQPLPLDEEHEHSDGEGPES                               | 32  |
| XP_00386733.1[A.queenslandica] | -----                                                           | 0   |
| XP_047134887.1[H.vulgaris]     | -----MGPPPAQPKPTIENNQPLNEEAPSLDVTVDGRPQRF-----                  | 34  |
| XP_001626412.1[N.vectensis]    | -----                                                           | 0   |
| XP_032829936.1[P.marinus]      | ADGTHAGIFAADRLQQQGA--GSPFNSPSPR-DNDTA--TAPAIGE-----             | 43  |
| NP_001117034.1[S.salar]        | -----CAGASPKSKVDLNGTGDTPRPTTLGVN-----VVKSNGLDNHLSDRS            | 85  |
| NP_001131055.1[X.laevis]       | SARG-ASPWDPMDTH-----RPQLNGLGFNNGG--SLPCSQ-EDELEDMD-----         | 76  |
| NP_001244212.2[G.gallus]       | TSRP-VALWSPPEELD-----GCEPESERG-----                             | 121 |
| NP_032588.1[M.musculus]        | ASAA-AAIVSPPEELD-----GCEPEAI GK R-PA--VLPLLERVSEAAKSS-----      | 135 |
| Q07820[H.sapiens]              | APAA-DAIMSPPEELD-----GYEPEPLGKR-PA--VLPLLELVGESGNN-----         | 154 |
| XP_002810320.1[P.abelii]       | APAA-DAIMSPPEELD-----GYEPEPLGKR-PA--VLPLLELVGESGNN-----         | 154 |
|                                |                                                                 |     |
| XP_019634801.1[B.belcheri]     | VDSRREETGGVPARVWTFLREFSVRDWLRNAKDAALDLRQYVLDVPETI-----K-G       | 84  |
| XP_00386733.1[A.queenslandica] | -----MA-----LVVNPAPVQHQY-----HHKNS                              | 19  |
| XP_047134887.1[H.vulgaris]     | -----NNGGTR-----LRNQPRWVNVN-----                                | 54  |
| XP_001626412.1[N.vectensis]    | -----                                                           | 6   |
| XP_032829936.1[P.marinus]      | -----ACG-AP-----PPTTATSADSVSHSAADIQAT                           | 70  |
| NP_001117034.1[S.salar]        | -----NND-DS-----LPCTPQMASEC-----G                               | 102 |
| NP_001131055.1[X.laevis]       | -----DNG-SQ-----GSTSPDPSVVC-----P                               | 93  |
| NP_001244212.2[G.gallus]       | -----PGG-DS-----LPGTPELPDL-----I                                | 138 |
| NP_032588.1[M.musculus]        | -----GAD-GS-----LPSTPPP-PEE-----E                               | 151 |
| Q07820[H.sapiens]              | -----STD-GS-----LPSTPPP-AEE-----E                               | 170 |
| XP_002810320.1[P.abelii]       | -----STD-GS-----LPSTPPP-AEE-----E                               | 170 |
|                                |                                                                 |     |
| XP_019634801.1[B.belcheri]     | SLWSQAAPTEKSVIDESRQLIRDYINGRLKKSNLTRGR-----LPDAKRRPTE           | 132 |
| XP_00386733.1[A.queenslandica] | PKRRGSPVQDDKFEYETRNLTACIESASGKEPLSV-----KLSE                    | 59  |
| XP_047134887.1[H.vulgaris]     | -----SSNQVIESTPELFTQLFLVNRMDNDNIIEVP EE-----LRNRSRNGTVNKE       | 98  |
| XP_001626412.1[N.vectensis]    | -----YDNANAVAARKMKTPEEKIAHELAKDFIGY-----KLGGKTRLNTK             | 47  |
| XP_032829936.1[P.marinus]      | RSGGSRPYNDALTIVETANFITGYMAHLTPTEQPPH-----QQQLSS                 | 112 |
| NP_001117034.1[S.salar]        | PELSNCPSPGDEVLEHDTLRLIENFLGDYTGLSQP-----RWTQSK                  | 142 |
| NP_001131055.1[X.laevis]       | K-----DGLYMDTQQLLILAFPRVYSGEESGEL-----BASCLLQHGWHHK             | 133 |
| NP_001244212.2[G.gallus]       | P-----DELROSELELLLYLREAGGEAFQVKLFPGLLQGPGRPCFCASSAVMEK          | 189 |
| NP_032588.1[M.musculus]        | E-----DDLYRQSL E I I SRYLREQATGSKD-----SKPLGEAGAAGR             | 189 |
| Q07820[H.sapiens]              | E-----DELYRQSL E I I SRYLREQATGAKD-----TKPLGRSGATSRK            | 208 |
| XP_002810320.1[P.abelii]       | E-----DELYRQSL E I I SRYLREQATGAKD-----TKPLGRSGATCRK            | 208 |
|                                |                                                                 |     |
| XP_019634801.1[B.belcheri]     | VSSQLQKMGGELERMPHLYRDVSRQINITLSSESILETSFETVANELFSTGI-TWARIV     | 191 |
| XP_00386733.1[A.queenslandica] | EALRIVGMVQOTLKADEIFFRKLCELELAT--N-LFSKLMVDVGMFSDGQVNI GRLL      | 116 |
| XP_047134887.1[H.vulgaris]     | VAHCLKRI GDDLNNHQLN--HLISSIQVTR--T-AYKTFDFVASHVFDAGTINWGRVV     | 153 |
| XP_001626412.1[N.vectensis]    | SALILRKLSNQIENKHELFLRNMCDRLDIRQH--N--APETFFQVADEIFGDGI--NWGRIV  | 103 |
| XP_032829936.1[P.marinus]      | ASELLKSMGDSLLEQHRAAISGMVSRVEAQTDPEE-LRGSALGVAREMFSDGHMNGRIV     | 171 |
| NP_001117034.1[S.salar]        | PLTTMKRVVEDVIAKHRYAYNGMVAKLDDLRCD--MG-VINSVAKTMFSDGITNWGRIA     | 200 |
| NP_001131055.1[X.laevis]       | ALETLLRVGG E I I EKHMAFTGMLQRLSIHSR-ED-LQ-KLSEVPALVFNDGVTNWGRIV | 190 |
| NP_001244212.2[G.gallus]       | ALETLLRRVGDGVQKHELAFQGMRLKLEIKKE-DD-LQ-AVCEVAHVFDNGVTNWGRVV     | 246 |
| NP_032588.1[M.musculus]        | ALETLLRRVGDGVQRNHETAFQGMRLKLDIKNE-GD-VK-SFSRVMVHVFDGVTNWGRIV    | 246 |
| Q07820[H.sapiens]              | ALETLLRRVGDGVQRNHETAFQGMRLKLDIKNE-DD-VK-SLSRVMVHVFDGVTNWGRIV    | 265 |
| XP_002810320.1[P.abelii]       | ALETLLRRVGDGVQRNHETAFQGMRLKLDIKNE-DD-VK-SLSRVMVHVFDGVTNWGRIV    | 265 |
|                                |                                                                 |     |
| XP_019634801.1[B.belcheri]     | AMFAVAGAFVDCVHQGHMPF--TRRLVD/VVDFTD-RKLSAWLVQEGGWGLVKHFRGD      | 248 |
| XP_00386733.1[A.queenslandica] | ALLAFQCQCVTYCRSVGLPSI--ESSVPHMAISFISTTHLKDWITNRRGWD AISKELMLR   | 174 |
| XP_047134887.1[H.vulgaris]     | TLFYFAYKLAIQV--VNQLPL--VEIVIGWQKFVT--DRLAQWIAERGGWNAVQEYFGST    | 208 |
| XP_001626412.1[N.vectensis]    | VLYTFAGVKAKYQENQLDNA--ENVATW-VGNVY-ASKSDWVKAGGWAFAFQFKDV        | 158 |
| XP_032829936.1[P.marinus]      | ALVVFCALLVKRLKASGRLSDAEARAVADEVA AFLV--SSRKAWFVQGGWNGFVREFERE   | 230 |
| NP_001117034.1[S.salar]        | SLVAFGAVVSQHLKERGRGHC--VELVGEIAKYLL--SDQSDWL IKNNAWNGFVEFFHVQ   | 230 |
| NP_001131055.1[X.laevis]       | TVISFGAFVAKHLKSLNLEDC--IGVLAEHFTQFLM--MSKKDW I I QEKWMDGFVDFHIE | 247 |
| NP_001244212.2[G.gallus]       | TLISFGAFVAKHLKSLNQEK--ITSLAGIITDVLV--SSKREWLMSQGGWEGFVDFFRVE    | 257 |
| NP_032588.1[M.musculus]        | TLISFGAFVAKHLKSLVQESF--IEPLAETITDVLV--RTKRDWLVKQRGWDGFVEFFHVQ   | 303 |
| Q07820[H.sapiens]              | TLISFGAFVAKHLKLTINQESC--IEPLAESITDVLV--RTKRDWLVKQRGWDGFVEFFHVE  | 322 |
| XP_002810320.1[P.abelii]       | TLISFGAFVAKHLKLTINQESC--IEPLAESITDVLV--RTKRDWLVKQRGWDGFVEFFHVE  | 322 |
|                                |                                                                 |     |
| XP_019634801.1[B.belcheri]     | GRTHM-----FWAISGIGAAIGLAATFFVIDP-----                           | 275 |
| XP_00386733.1[A.queenslandica] | TSATNSSTSSRTASNGMWLQWGV S-GIALAISVFDALHNSS                      | 214 |
| XP_047134887.1[H.vulgaris]     | T-----VQFVGVFAA-GFLFAYILTKVFR--                                 | 232 |
| XP_001626412.1[N.vectensis]    | QEEHEKFW--WNSLLCTTLGLGSL-AAVLYM--KS-----                        | 188 |
| XP_032829936.1[P.marinus]      | TPDSA--L--KNTL-MAVAGFGAM-TALAALGVRKILSGFC                       | 265 |
| NP_001117034.1[S.salar]        | DPES--V--RNTL-LAFAGVAGI-GATLAMP I R--                           | 285 |
| NP_001131055.1[X.laevis]       | DYESG--L--KTVL-MAFSSVAVL-GAGLAYMIR-----                         | 275 |
| NP_001244212.2[G.gallus]       | DLESS--I--RNVL-MAFAGVAGL-GASLAYMIRKWR S--                       | 335 |
| NP_032588.1[M.musculus]        | DLEGG--I--RNVL-LAFAGVAGV-GAGLAYLIR-----                         | 331 |
| Q07820[H.sapiens]              | DLEGG--I--RNVL-LAFAGVAGV-GAGLAYLIR-----                         | 350 |
| XP_002810320.1[P.abelii]       | DLEGG--I--RNVL-LAFAGVAGV-GAGLAYLIR-----                         | 350 |
