# Supplementary material for: An Evolutionary Perspective on the Origin, Conservation and Binding Partner Acquisition of Tankyrases
Source: MDPI journal article supplement (doi:10.3390/biom12111688), 2022-11-15
Supplement: s1 [file s1]

# SH3BP5

## Homo sapiens:

>sp|O60239|3BP5\_HUMAN SH3 domain-binding protein 5 OS=Homo sapiens OX=9606 GN=SH3BP5 PE=1 SV=2  
MDAALKRSRSEEPAEILPPARDEEEEEEEGMEQGLEEEEEVDPRIQGELEKLNQSTDDIN  
RRETELEDARQKFRSVLVEATVKLDELVKKIGKAVEDSKPYWEARRVARQAQLEAQKATQ  
DFQRATEVLRAAKETISLAEQRLLEDDKRFDSAWQEMLNHATQRMVEAEQTKTRSELVH  
KETAARYNAAMGRMRQLEKKLKRAINKSKPYFELKAKYVYVQLEQLKKTVDLQAKLTLAK  
GEYKMAKNLEMISDEIHERRRSSAMGPF**RGCGVCGAL**GSSTSVEDLPGSKPEPDAISVASE  
AFEDDSCSNFVSEDDSETQSVSSFSSSGPTSPSEMPDQFFAVVRPGSLDLPSPVLSSEFGM  
MFPVLGP**SEFCSGAG**SPCEVERGDRAGEAENKTSKANNNRGLSSSSSGSGSSKSQSST  
SPEGQALENRMKQLSLQCSKGRDGIADIKMWQIG

## Pongo abelii:

>XP\_002814083.1 SH3 domain-binding protein 5 [Pongo abelii]  
MDAALKRSRSEEPAEILPPARDEEEEEEEGMEQGLEEEEEVDPRIQGELEKLNQSTDDINRRETELEDAR  
QKFRSVLVEATVKLDELVKKIGKAVEDSKPYWEARRVARQAQLEAQKATQDFQRATEVLRAAKETISLAE  
QRLLEDDKRFDSAWQEMLNHATQRMVEAEQTKTRSELVHKETAARYNAAMGRMRQLEKKLKRAINKSKP  
YFELKAKYVYVQLEQLKKTVDLQAKLTLAKGEYKMAKNLEMISDEIHERRRSSAMGPF**RGCGVCGAL**GSST  
SVEDLPGSKPEPDAISVASEAFEDDSCSNFVSEDDSETQSVSSFSSSGPTSPSEMPDQFFAVVRPGSLDLPS  
SPVLSSEFGMMFPVLGP**SEFCSGAG**SPCEVERGDRAGEAENKTSKANNNRGLSNSSGSGSSKSQSSI  
SPEGQALENRMKQLSLQCSKGRDGIADIKMWQIG

## Mus musculus:

>NP\_036024.2 SH3 domain-binding protein 5 isoform 1 [Mus musculus]  
MDTALKRSRSDPEAELPPPAREVEEKEEEEEERMEQGLEEEEEVDPRIQGELEKLNQSTDDINRRETELE  
DARQKFRSVLVEATVKLDELAKKIGKAVEDSKPYWEARRVARQAQLEAQKATQDFQRATEVLRAAKETIS  
LAEQRLLEDDKRFDSAWQEMLNHATQRMVEAEQTKTRSELVHKETAARYNAAMGRMRQLEKKLKRAINK  
SKPYFELKAKYVYVQLEQLKKTVDLQAKLALAKGEYKAALKSLERISDEIHERRRSSAMGPF**RGCGVCGAL**  
SLSAVENLFPVKPEPDALSVASEAFEDDNCNLVSEDDSETQSVSSFSSSGPTSPSEMPDQFFAVARFGSL  
DLPSFVLSSEFGMMFPVLGP**SEFCSGAG**SPCEVERGDRAGEAENKMSDKANNNRVLGSTNGSGGRSRSQ  
SSTSLESQALETRMKQLSLQCSKGRDGIADIKMWQIG

## Gallus gallus:

>NP\_001026160.3 SH3 domain-binding protein 5 [Gallus gallus]  
MEPGRGRGARAEEAPREEEEVDPRIQGELEKLNQSTDVINRRETELEDARQKFRSVLVEATVKLDELVK  
KIGKAVEDSKPYWEARRVARQAQLEAQKATQDFQRATEVLRAAKETISLAEQRLLEDDKRFDSAWQEM  
LNHATQRMVEAEQTKTRSELVHKETAARYNAAMGRMRQLEKKLKRAINKSKPYFELKAKYVYVQLEQLKKT  
VDLQAKLSLAKGEYKTALKNLEMISDEIHERRRSSAMGPF**RGCGVCGAL**GSNTSVEDLSTSKPELDAVSMAS  
EVFEDDNGSSFVSEEDSETQSVSSFSSSGPTSPSEVPAPFFPATRPGTLDLPSPVLSSEFGAIFPILGP**RG**  
**FCSCGAS**SPCEAERGDRAEGAENKASDRVNKNRSSNRSGSTEGALDNRMKQLSLQCMKIKEGICAGRKA  
AQIG

## Xenopus laevis:

>XP\_018122983.1 SH3 domain-binding protein 5 [Xenopus laevis]  
METTLINNTGQQENEQLKEEEEEVDPRIQGELEKLNQSTDDINRREIELEDARQKFRSVLVEATLKLDE  
MVKKIGKAVEDSKPYWEARKVARQAQLEAQKATQDFQRATEVLRAAKETISLAEQRLLEDDKRFDSAWQ  
EMLNHATQRMVEEEQKTRSELHKEATAAKYNAAMGRMRQLEKKLKRTINKSKPYFELKAKYVYVQLEQLK  
KTYVDLQAKLSLAKGEYKTALKNLEMISDEIHEKRRSSAMGPF**RGCGVCGAL**GSNNLEDLACKLSDSNISM  
TSEVFDDNLSLVSSEDDSETQSMSSPSVPTSPAETPSFPFNVPFRGSLDLSSPLSLSDPGLISFILGP  
**RGSGSGAS**SPECDLERGNRAEGSENSAAQDRINNNSKNSNRKAMALPVLDNKIKQITLECTKTNGNTNER  
KKCSRSQSLASTLLVNAV

## Salmo salar:

>XP\_014056350.2 SH3 domain-binding protein 5 [Salmo salar]  
MDNLKENRSDSDSEYEEEEVDPRIQGELEKLNQSTDDINRCETQLEDARQKFRTVLVEATVKLDELVKK  
IGKAVESKPYWEARRVARQAQLEAQKATQDFQRATEVLRAAKETIALAEQRLLEEDTRQFDSAWQEMLN  
HATQRMVEAEHTKTRSELVHKETAAKYTAAMGRMRQLEKKLKRTINKSKPYFELKAKYVYVQLEHLKKNVD  
ELQAKLSQAKEGYKTALRNLEVISDEIHERRRNSAMGPF**RGCGVCGAL**SDSASVDDISSFKMESDGISMTSE  
SFEDETCSSAMSEEDSETRSTCSPQDLPSPCPSASSSSPAPSSSSPAPSSRRCSDLPSPVLSLDFGL  
ISPVLGP**SEFCSGAG**SPECDLERGDRAGEGELDNTVNNNSTTVPNTNKTTGLEVRLSFLSLRRSRNDS  
TNNTKRERQSRSQTPQTPTVVLINGL

## Petromyzon marinus:

>Xp\_032831288.1 SH3 domain-binding protein 5-like [Petromyzon marinus]  
MYWTKMIKMMIMMMQVMTMMCLQVMKAEDQKGRSELVHKQTAERYSVTMVHMQLERKLLKRTIKKSRP  
YIELKAKYVYLEHQKQVAEGLQEAVTATTKGQYRAALDSLERSDEIHARRKASAVEEP**RGSGVCGAL**ITG  
AFSMELGFFSMGDGDSFVSADACESDACSLMAKSDDNVLES CSPAGGAVPPAPLPTRPALQLAASEPG  
SGRSRSGSSGSGSRSSSGGADPDSGFFSPVQDERLGP**RGSGVCGAL**SPCEGLPLPTGAGSSLPSPSEAEA  
EPAEKTAAETGREGFCVDSVTPRGEEEEEDGSDAASGASGTHTAIDGCVGGGERERDMRAARERQE  
EEEDGADSGEATAKESGDGQVAEGEGRSVSGTDGGAAMHEASPEEPEAAAWAVRAEDLSVGGVVKLEQKDE  
EVEDEGEVEKVEVEVEEVEDEEVDLQGDIDRGGEVAGAGFTAGALGASVRDVAL

## Branchiostoma belcheri:

>KAI8492211.1 SH3 domain-binding protein 5 [Branchiostoma belcheri]  
MSEQQGPETSSSGDEGLDPRIQEELERLNAASNEINKLEAELDEARALFRQTLTESTQKLNLSKKRMGKSV  
QKARPYIDAKKMAKQVQAEQKAAVEYQRANGIHRAARETISLAEQRLFSDADEKRFDSAWQEMLNHAT  
MKVMEAEQMRKSEHDHQKQAEAYNTANHKQLQLEKSLKKVIAKTKPYFDVKTSLFELQLLQKQKQNVEDLQ  
KAVSASKVKYREALKNLESISDEIHRNRQLLKEPF**RGSGVCGAL**ADRDLDLPEINLDDVDCSQSYSLDDDGNS  
LDDTSTDDASMIATDDASLSRRDRGGSFTHSSSSVGESVSSSSAVGAACSQDVVEKTAEGGCTNEGTA  
TESGQAVEGGSYTEGTAPAVQAVEGGLTEKVTAGDGDKAEDSMVAGTVTCREEEQHRMEEIQMLTEGNS  
QNTSQNADTTEIETDKTDKEDIDVHVQAEAVDDVEKSFEDVVEEGYKEDMSHNADVPTPVAIPGNVNAEE  
VVEQQVPTPEVVAESESFPFLKNEGDRMTNPNVAVACDPSLKDEYKVSRECREVIEQKVGQDEVKFES  
VVGSALENQEPKVAFEVDVVKETVEALEESQTAGSVTCGRNDEEDNAKREEGTEVRSVESQETSVPDTPVE  
AVNSASIEVSNVSTEEKPPEIRQTDKSSSVKEIRGSDNS

**Drosophila melanogaster:**

>NP\_611010.4 parcas [Drosophila melanogaster]  
MSSAEDGELDPQIQIELENLSATDEINKLEIELEEANSTFRILLNESTRRLKVSSSKKLGNCIEKARPY  
EALDKAREAQIECQKAAVKFQRANEIHAAAKETVALAEQRFMNSHEWQFDNAWQEMLNHATQKVMDAET  
QKADCHAEHRLTKLFNAAEQKLQQLLEDRFRRSINKSRPYFEEKQVCQDLQTQKNRIQELQQQVAGAKS  
TYSTALNLERISEDHHRQRGDFPTPPGP: **KEGVCS** LNSPTSSALPSLPDFQLELEKCDYPSIAGSQMS  
LGAKTPQAAATEDEEDACDYDETGADELRGVVDERDLEALRQVKILAVRFIEGGDQQQNDVWEHELK  
ATVDKLDHLMMLKETAKRQQTNRLKSTEQRPDSLGAELKRHCDVVEVKVTSCATTASLPVTFHHQLNHL  
APPTPIKKLQQQLAPLPSVNVSMRELPLLARLSNELLDRSSAAGGVKRTLRRRSLE

**Hydra vulgaris:**

>XP\_047136805.1 SH3 domain-binding protein 5-like isoform X1 [Hydra vulgaris]  
MYDSLVLLEMISKENEARQKSKYNNVEENEEEEELDPRIKCELERLNAATDGINHLETEFGEAQALFQQLM  
QDAAFNLKVMHQKLGKAVDKSRPYEALKCAKISHSELHEALKFEQAQTRHFNAKKLIVTDTERIVFSSST  
DRKLDPALQEMLNQATVEVMEAAATQSQKAWEVHRNASVEFEKKNKVALDLYDSLKKHIVKSRPYFDLKSS  
FNQQLDLQKTRLEKVQEGLVQSKNEYAKILHNLELISDDIHQSREMKRKCSEM**KEGVCS** SQSNNNVL  
VYKDVEKQEEKNNSNLVLNQRDDNIGDKENLDKNLSQVSGQTELVNLGESLSQSSDLFLNQNDENIGCNE  
NLGESLSQVSGPTLVKIRKQVQSLLETSAEQKSKNRLSQTERLINVNKTLIENCFDKSYDVITSHSIPF  
SHPQEEFVDSSINIEYHNISKFLKKSFILPEFEIIPRRHTISGEKDSFQLLNHNKKLFCCKSSSALI

**Nematostella vectensis:**

>XP\_001637874.3 SH3 domain-binding protein 5-like [Nematostella vectensis]  
MSSLTLSTDDTKLSHKFSDDVDSEESLDPRVKGELERLNSATTEINCLEKALEEMHALFRQTLTESAFV  
LKSHANRYGKSINQSRPYEALERSKKAQIATQKAALKYERACCTHQAAKEMVARAEKLVSTKEHKVL  
DPTWQDMLNKAVMKVMESEQEKCHAEKEHLETAHLFTKAGKELQDLTKLTAINKSRVYFDLTKTKMDQ  
LEAHKKKEVISLQGKLKVAKKDYMSLRKLEGISDETHEVRQSRISLCLPS**KEGVCS**CPGHQAQPSGRT  
ARDWDEGMMVLPDGRCDDSDKSTTDTSTRGDTSESIPDAVCNDTSKPIPDGVCNDTSKSIIPDAVCNDTSK  
SIPDAVCNDTSKSIIPDPVCNLDSEPKISTMDRASDVSPAGACNDTAESALDAVCGDLGELPSEGTIDD  
FSEST

**Amphimedon queenslandica:**

No homolog found.

## Alignment

```
O60239[H.sapiens]          MDAALKRSRSEEPAEILPPARDEEE-----EEEEEMQGLEE-EEEVDPRIQGELEKL 52
XP_002814083.1[P.abeli]i  MDAALKRSRSEEPAEILLPPARDEEE-----EEEEEMQGLEE-EEEVDPRIQGELEKL 52
NP_036024.2[M.musculus]   MDTALKRSRSEDEPAELPPAREVEE-----KEEEEERMEQGLEEEEEVDPRIQGELEKL 55
NP_001026160.3[G.gallus]  -----MEPG-----GRRGRAAEAPRPEEEVDPRIQGELEKL 33
XP_018122983.1[X.laavis]  ME-----TILI-----KNTGQENEQLKEEEEEVDPRIQGELEKL 36
XP_014056350.2[S.salar]   -----MD-----NLEKENRSDEDSVEEEVDPRIQGELEKL 32
XP_032831288.1[P.marinus] -----0-----0 0
KAT8492211.1[B.belcher]i -----MSEQGQPETSSGDEGLDPRIQEELERL 27
NP_611010.4[D.melanogaster] -----MSSADEGLDPQIQIETLENL 20
XP_047136805.1[H.vulgaris] -----MYDSLVLLEMISKENEARQKSKYNNVNEEEEEELDPRIKCELERL 45
XP_001637874.3[N.vectensis] -----MSS-LTLSTD-----DTKLSHKFSDDVEDSEESLDPRVKGELERL 39

O60239[H.sapiens]          NQSTDDINRKRETELEDARQKFRSVLVEATVKLDELVKKIGKAVEDSKPYWEARRVARQAA 112
XP_002814083.1[P.abeli]i  NQSTDDINRKRETELEDARQKFRSVLVEATVKLDELVKKIGKAVEDSKPYWEARRVARQAA 112
NP_036024.2[M.musculus]   NQSTDDINRKRETELEDARQKFRSVLVEATVKLDELAKKIGKAVEDSKPYWEARRVARQAA 115
NP_001026160.3[G.gallus]  NQSTDVINRKRETELEDARQKFRSVLVEATVKLDELVKKIGKAVEDSKPYWEARRVARQAA 93
XP_018122983.1[X.laavis]  NQSTDDINRKRETELEDARQKFRSVLVEATVKLDEMVKKIGKAVEDSKPYWEARRVARQAA 96
XP_014056350.2[S.salar]   NQSTDDINRCETQLEDAARQKFRVTLVEATVKLDELVKKIGKAVEESKPYWEARRVARQAA 92
XP_032831288.1[P.marinus] -----0-----0 0
KAT8492211.1[B.belcher]i  NAASNEINKLEAELEDEARALFQRTLTESTQKILNLSKKMGKSVQKARPYDAKKMAKQAA 87
NP_611010.4[D.melanogaster] NSATDEINKLEIELEEA NSTFRILLNESTRRLKLVSSKKLGNCIEKARPYEALDKAKAEAA 80
XP_047136805.1[H.vulgaris] NAATDGINHLETEFGEAQALFQQLMQDAAFNLKVMHQKLGKAVDSKSRPYEALKCAKISH 105
XP_001637874.3[N.vectensis] NSATTINCLEKALEEMHALFRQTLTESAFVLNKSHPANRQKSIQSRPYEALERSKKAQ 99

O60239[H.sapiens]          LEAQKATQDFORATEVLRAAKETISLAEQRLL--DDKRQFDSAWQEMLNHATQRMVEAE 170
XP_002814083.1[P.abeli]i  LEAQKATQDFORATEVLRAAKETISLAEQRLL--DDKRQFDSAWQEMLNHATQRMVEAE 170
NP_036024.2[M.musculus]   LEAQKATQDFORATEVLRAAKETISLAEQRLL--DDKRQFDSAWQEMLNHATQRMVEAE 173
NP_001026160.3[G.gallus]  LEAQKATQDFORATEVLRAAKETISLAEQRLL--DDKRQFDSAWQEMLNHATQRMVEAE 151
XP_018122983.1[X.laavis]  LEAQKATQDFORATEVLRAAKETISLAEQRLL--DDKRQFDSAWQEMLNHATQRMVEAE 154
XP_014056350.2[S.salar]   LEAQKATQDFORATEVLRAAKETIALAEQRLL--EDTRQFDSAWQEMLNHATQRMVEAE 150
XP_032831288.1[P.marinus] -----MMVTMKIMMMIMMMVMVMMLQVMKAE 30
KAT8492211.1[B.belcher]i  VEAQKAAYEQRANGIHRARETISLAEQRLLFSDADEKQFDSAWQEMLNHATQRMVEAE 147
NP_611010.4[D.melanogaster] IECQKAAYKFORANEIHAAAKETVALAEQRFSNSH-EWQFDNAWQEMLNHATQRMVDAE 139
XP_047136805.1[H.vulgaris] SELHEAALKFEQAQTRHFNAKKLVTDTERIVFS--STDRKLDPALQEMLNATQVMEAA 163
XP_001637874.3[N.vectensis] IATQKAALKYERACCTHQAAKEMVARAEKLVSTSEKHKVLDPTWQDMLNKAVMKMESE 159
.. : :. **.

O60239[H.sapiens]          QTKTRSELVHKETAARYNAAMGRMRQLEKKLKRAINKSKPYFELKAKYVVQLEQLKKTVD 230
XP_002814083.1[P.abeli]i  QTKTRSELVHKETAARYNAAMGRMRQLEKKLKRAINKSKPYFELKAKYVVQLEQLKKTVD 230
NP_036024.2[M.musculus]   QTKTRSELVHKETAARYNAAMGRMRQLEKKLKRAINKSKPYFELKAKYVVQLEQLKKTVD 233
NP_001026160.3[G.gallus]  QTKTRSELVHKETAARYNAAMGRMRQLEKKLKRAINKSKPYFELKAKYVVQLEQLKKTVD 211
XP_018122983.1[X.laavis]  QKTKRSELLHKETAARYNAAMGRMRQLEKKLKRTINKSKPYFELKAKYVVQLEQLKKTVD 214
XP_014056350.2[S.salar]   HTKTRSELVHKETAARYNAAMGRMRQLEKKLKRTINKSKPYFELKAKYVVQLEHLKKNVD 210
XP_032831288.1[P.marinus]  QDKGRSELVHKQTAERYSVTMVHMNQLEKRLKRTIKKSRPYELKAKYVLELEHQKQVRE 90
KAT8492211.1[B.belcher]i  QMRKSSEHDHQKAAEYNTANHKLQLEKLSKKVIKTKTPYFDVKTSFELQLLQKQNVRE 207
NP_611010.4[D.melanogaster] TQKADCHAEHQRLTKLFNAAEQKLQLEEDFRFRSINKSRPYFEKQVCQDQLQTKQNRQI 199
XP_047136805.1[H.vulgaris] TQSQKAWVEHNRNASVEFEKKNKVALDLYDSLLKXHVKSRYFDLKSFFNQQLDLQKTRLE 223
XP_001637874.3[N.vectensis] QEKCHAEKEHLETAHLFTKAGKELQDLTKTKLTAINKSRVYFDLTKTYMDQLEAHKKEVI 219
. * . : : * : : * : : * : : * : : * : :

O60239[H.sapiens]          DLQAKLTLAKGEYKMAKNLEMISDEIHERRRSS---AMGPRCCGVGAEGSSTSVE---D 284
XP_002814083.1[P.abeli]i  DLQAKLTLAKGEYKMAKNLEMISDEIHERRRSS---AMGPRCCGVGAEGSSTSVE---D 284
NP_036024.2[M.musculus]   DLQAKLALAKGEYKAALKSLERISDEIHERRRSN---AMGPRCCGVGAEGSIAVS---N 287
NP_001026160.3[G.gallus]  DLQAKLSLAKGEYKALKNLEMISDEIHERRRSA---AMGPRCCGVGAEGSNTSVE---D 265
XP_018122983.1[X.laavis]  DLQAKLSLAKGEYKALKNLEMISDEIHEKRRTS---SMGPRCCGVGAEGSNN--SLE---D 267
XP_014056350.2[S.salar]   ELQAKLSQAKGEYKALTALNLEVISDEIHERRRSN---AMGPRCCGVGAEGSDASVD---D 264
XP_032831288.1[P.marinus]  GLQEAVTATKGQYRAALDSLERISDEIHARRKA---SAVEPRCCGVGAETTTGAFSM---E 145
KAT8492211.1[B.belcher]i  DLQKAVASAKVRYREALKNLESISDEIHRFRQ-L---LKEPRAGVGAADADRDLP---E 262
NP_611010.4[D.melanogaster] ELQGVVAGAKSTYSTALTALNLERISDEIHRQGD-FPTTPGPRVGAALNSPTSSALPS 258
XP_047136805.1[H.vulgaris] KVQEGLVQSKNEYAKILHNLELISDDIHQSRMRKRVCSSEMG-EGVAVSSQSNNVLYVK 283
XP_001637874.3[N.vectensis] SLQGLKVAKKYDYSMLRKLLEGISDEIHEVRQSRISLCLPS-ELSGVGA-SCPHQAP---S 276
.* : : * * . * . * . * . * . * . * . * . * . * . * . * . * .

O60239[H.sapiens]          LPGSKPEP-----DAISVASEAFEDDSCSNF---VSEDDSET---QSVSSFSSGP 328
XP_002814083.1[P.abeli]i  LPGSKPEP-----DAISVASEAFEDDSCSNF---VSEDDSET---QSVSSFSSGP 328
NP_036024.2[M.musculus]   LPVSKPEP-----DAISVASEAFEDDSCSNL---VSEDDSET---QSVSSFSSGP 331
NP_001026160.3[G.gallus]  LSTSKPEL-----DAVSMASEVFEDDNGSSF---VSEDDSET---QSVSSFSSGP 309
XP_018122983.1[X.laavis]  LSACKLDS-----DNISMTSEVFDDNLSL---VSEDDSET---QSMSSFSSGP 311
XP_014056350.2[S.salar]   ISSFKMES-----DGISMTSESFEDTCCSS---AMSEEDSET---RSTCSPQDLP 309
XP_032831288.1[P.marinus]  LGFFSMDG-----DSFSVASDACESDACSLM---ASKDDNYLES CSPAGAVP 191
KAT8492211.1[B.belcher]i  INLDDVDS--CSQY--SDLDDGNSLDTSTD TDDA-SMI---AQTDASLRDRRDRGFTSHS 314
NP_611010.4[D.melanogaster] LPDPQLELEKCDY-P-SIAGSQMSLGAKT--PQAA---AEETDE---EDACDYD--- 302
XP_047136805.1[H.vulgaris] DVEKQEEKNNMNLNLRQDDNIG--DKNELDNLSQ---VSGQTFLV--- 325
XP_001637874.3[N.vectensis] EGRGARDW-----D--EDGMMVLPGDRCDSDSKSTTDSRGDTSESIPDAVCNDTSKP 327
:

O60239[H.sapiens]          -T-----SPSEM-----PDQFPVAVRPGSLDLPSPV-----SLSEFG 359
XP_002814083.1[P.abeli]i  -T-----SPSEM-----PDQFPVAVRPGSLDLPSPV-----SLSEFG 359
NP_036024.2[M.musculus]   -T-----SPSEM-----PDQFPVAVRPGSLDLPSPV-----SLSEFG 362
NP_001026160.3[G.gallus]  -T-----SPSEV-----PAPFPVATRPGLTDLPSPV-----SLSEFG 340
XP_018122983.1[X.laavis]  -T-----SPAEL-----PSFPVNVRRPGSLDLSSPL-----SLSDFG 342
XP_014056350.2[S.salar]   -SPCPSASSSSPAPSSS-----S-SAPASSRPPCSLDLPSPV-----SLSDFG 349
XP_032831288.1[P.marinus]  PAPLPTR-----P-----PALQLAASEFGSGRSRSGSSSGSGRSRSGSGADPDSG 236
KAT8492211.1[B.belcher]i  -S-----SVGES-----VSSSSAVGAACSQDVVEKT-----A----- 340
NP_611010.4[D.melanogaster] -----NLGES-----LSQSSDL----- 302
XP_047136805.1[H.vulgaris] -----NLGES-----LSQSSDL----- 337
XP_001637874.3[N.vectensis] -IPDGVCDNDSKSI PDAVCNDTSKSI PDAVCDDTSKSI PDVPC-----DNLDESPKISTMD 382

O60239[H.sapiens]          MMFP-----VLGP-SEC-SGAS-----SPECEVERGDRAEGAENKTSIDKAN----- 399
XP_002814083.1[P.abeli]i  MMFP-----VLGP-SEC-SGAS-----SPECEVERGDRAEGAENKTSIDKAN----- 399
NP_036024.2[M.musculus]   MMFP-----ILGP-SEC-SGAS-----SPECEVERGDRAEGAENKMSIDKAN----- 402
NP_001026160.3[G.gallus]  AIFP-----ILGP-SEC-SGAS-----SPECEVERGDRAEGAENKASIDRVN----- 380
XP_018122983.1[X.laavis]  LISP-----ILGP-SEC-SGAS-----SPECDLERGDRAEGAEGELDNVTN----- 389
XP_014056350.2[S.salar]   LISP-----VLGP-SEC-SGAS-----SPECDLERGDRAEGAEGELDNVTN----- 389
XP_032831288.1[P.marinus]  FFSVPVDERLGP-SEC-SGAS-----SPECEGLPPLTGAGSLPPSEAEAEPAEKTRAETG 292
KAT8492211.1[B.belcher]i  -----EGGCTNEGTA-TESGQAVEGGSYTGTAFAVQAVE----- 374
NP_611010.4[D.melanogaster] -----ETGAGELRGVVDERDLEALRQKVK----- 326
XP_047136805.1[H.vulgaris] -FLN-----QNDENIGCNENLGESLSQVSGPT-----ELVKIRKQVQ----- 373
XP_001637874.3[N.vectensis] RASD-----VSPSAGACNDTAESALDAVCGDLGELPSEGTIDDFSEST----- 425

O60239[H.sapiens]          -NNRGLSSSSSGSGSSKSSQSSSTSPG-----QALENRMKQLSLQCSKGRDGI--IAD--- 448
XP_002814083.1[P.abeli]i  -NNRGLSSSSSGSGSSKSSQSSSTSPG-----QALENRMKQLSLQCSKGRDGI--IAD--- 448
NP_036024.2[M.musculus]   -NNRVLGSTNGSGSGRSRQSSSTLES-----QALETRMKQLSLQCSKGRDGI--IAD--- 451
NP_001026160.3[G.gallus]  -KNRSSNR-----SGSTEG-----LALDNRMKQLSLQCSKMKIKEGI--CAG--- 417
XP_018122983.1[X.laavis]  -NNSKSN-----RKAMAL-----PVLDNKIKQITLECTKTGNGT--NTE--- 419
XP_014056350.2[S.salar]   -NNSTTVPTNK-----T-----TGLEVRLSFSLRRSRNDSTN--NTK--- 425
XP_032831288.1[P.marinus]  REGFCVDVTPRGEEDGSDAAASGA-----SGT-----HTAI-ADGG-----VGGGE 336
```

|                             |                                                               |     |
|-----------------------------|---------------------------------------------------------------|-----|
| KAI8492211.1[B.belcheri]    | --GG-LTEKVTAGDGDKAED-SMVVAGTVTCREEEQHRMEEIQMLTEGNSQNTSQNADTTE | 431 |
| NP_611010.4[D.melanogaster] | --ILAVRPiEGGDGQQQNDVWE---HEL---KATVDKLDHMLMKETAKRQQTNRLKSTE   | 378 |
| XP_047136805.1[H.vulgaris]  | -SL-L-----ET--SAEQKSKNRLSQTERLINVNKTLIENCDF---                | 407 |
| XP_001637874.3[N.vectensis] | -----                                                         | 425 |
|                             |                                                               |     |
| O60239[H.sapiens]           | IKM----VQIG-----                                              | 455 |
| XP_002814083.1[P.abelii]    | IKM----VQIG-----                                              | 455 |
| NP_036024.2[M.musculus]     | IKM----VQIG-----                                              | 458 |
| NP_001026160.3[G.gallus]    | RKA----AQIG-----                                              | 424 |
| XP_018122983.1[X.laavis]    | RKK----CSRS-QSLA-----S-T-LLVNA                                | 437 |
| XP_014056350.2[S.salar]     | RER----QSRG-QTPT-----QT-V-VLING                               | 444 |
| XP_032831288.1[P.marinus]   | RERDMRAAERRE-QEEDDGADSGEATKESGDGQVAEGEGRSVSG-----TDG          | 384 |
| KAI8492211.1[B.belcheri]    | IETDKTKEDID-VHVQGEAVDDVEKSF---EDVVEEGYKEDMSHNDVPT-P-VAIPG     | 484 |
| NP_611010.4[D.melanogaster] | QRP-----DSLQ-AEALKRHC-----DVVEVKVTS-CATTASLPVTPHHQLNH         | 419 |
| XP_047136805.1[H.vulgaris]  | KSYDVITSHSIPFSPQEEFVDSSINEY---HN-----ISK                      | 440 |
| XP_001637874.3[N.vectensis] | -----                                                         | 425 |
|                             |                                                               |     |
| O60239[H.sapiens]           | -----                                                         | 455 |
| XP_002814083.1[P.abelii]    | -----                                                         | 455 |
| NP_036024.2[M.musculus]     | -----                                                         | 458 |
| NP_001026160.3[G.gallus]    | -----                                                         | 424 |
| XP_018122983.1[X.laavis]    | V-----                                                        | 438 |
| XP_014056350.2[S.salar]     | L-----                                                        | 445 |
| XP_032831288.1[P.marinus]   | GAAMHFAEPREE---PAAA-----WAVRAEDLSVGGV                         | 413 |
| KAI8492211.1[B.belcheri]    | NNVAEE-VVEQQQVTPTTEVKAESFPTLKNEGDRTNMPNVAACDPSLKDE-VKVSEC     | 542 |
| NP_611010.4[D.melanogaster] | LAPPTPIKKLQQQLAPLPSVNVSMRELPLLARLSN-----ELDRSSAAFQGV          | 467 |
| XP_047136805.1[H.vulgaris]  | FLKKSPILEFEFIIIPRHTISGEKDSFQLLNHNKK-----LFCKSS-----           | 481 |
| XP_001637874.3[N.vectensis] | -----                                                         | 425 |
|                             |                                                               |     |
| O60239[H.sapiens]           | -----                                                         | 455 |
| XP_002814083.1[P.abelii]    | -----                                                         | 455 |
| NP_036024.2[M.musculus]     | -----                                                         | 458 |
| NP_001026160.3[G.gallus]    | -----                                                         | 424 |
| XP_018122983.1[X.laavis]    | -----                                                         | 438 |
| XP_014056350.2[S.salar]     | -----                                                         | 445 |
| XP_032831288.1[P.marinus]   | KLEQKDEEVEDEGEVE-----KVEVEE-VEEDEEVDLQGDIGDRGGE               | 455 |
| KAI8492211.1[B.belcheri]    | REEVIEQKVGQDEVKFESTEGSALENQEPKAFEDVVVKETVEAIEESQTAGSVTGRNDE   | 602 |
| NP_611010.4[D.melanogaster] | RKTLRRRS-----LE-----                                          | 477 |
| XP_047136805.1[H.vulgaris]  | -SALI-----                                                    | 485 |
| XP_001637874.3[N.vectensis] | -----                                                         | 425 |
|                             |                                                               |     |
| O60239[H.sapiens]           | -----                                                         | 455 |
| XP_002814083.1[P.abelii]    | -----                                                         | 455 |
| NP_036024.2[M.musculus]     | -----                                                         | 458 |
| NP_001026160.3[G.gallus]    | -----                                                         | 424 |
| XP_018122983.1[X.laavis]    | -----                                                         | 438 |
| XP_014056350.2[S.salar]     | -----                                                         | 445 |
| XP_032831288.1[P.marinus]   | GVAGAGFTAGALGASVRDVAL-----                                    | 476 |
| KAI8492211.1[B.belcheri]    | EDN----AKREEGTEVRSVESQETSVPDTPVEAVSNASIEEVSNTSTEEKPPEIRQTDKS  | 658 |
| NP_611010.4[D.melanogaster] | -----                                                         | 477 |
| XP_047136805.1[H.vulgaris]  | -----                                                         | 485 |
| XP_001637874.3[N.vectensis] | -----                                                         | 425 |
|                             |                                                               |     |
| O60239[H.sapiens]           | -----                                                         | 455 |
| XP_002814083.1[P.abelii]    | -----                                                         | 455 |
| NP_036024.2[M.musculus]     | -----                                                         | 458 |
| NP_001026160.3[G.gallus]    | -----                                                         | 424 |
| XP_018122983.1[X.laavis]    | -----                                                         | 438 |
| XP_014056350.2[S.salar]     | -----                                                         | 445 |
| XP_032831288.1[P.marinus]   | -----                                                         | 476 |
| KAI8492211.1[B.belcheri]    | SSVEKIRGRNDS-----                                             | 670 |
| NP_611010.4[D.melanogaster] | -----                                                         | 477 |
| XP_047136805.1[H.vulgaris]  | -----                                                         | 485 |
| XP_001637874.3[N.vectensis] | -----                                                         | 425 |
