# Supplementary material for: An Evolutionary Perspective on the Origin, Conservation and Binding Partner Acquisition of Tankyrases
Source: MDPI journal article supplement (doi:10.3390/biom12111688), 2022-11-15
Supplement: s1 [file s1]

# CASC3

## Homo sapiens:

>NP\_031385.2 protein CASC3 [Homo sapiens]  
MADRRRQRASQDTEDEESGASGSDSGGSPLRGGGSCSGSAGGGGSGSLPSQRGGRTGALHLRRVESGGAK  
SAEESCESEDGIEGDAVLSDYESAEDSEGEEGYSEENSKVELKSEANDAVNSSTKEEKGEKPDTKS  
TVTGE**RQSGDQGL**STEPVENKVGGKPKHLDDDEDRKNPAYIPRKGLFFEHLRGQTQEEEVVRPKGRQRK  
LWKDEGRWEHDKFREDEQAPKSRQELIALYGYDIRSAHNDDIKPRRIKPRYGSPPQRDPNWNGERLNK  
SHRHQGLGGTLPPrTFINRNAAGTGRMSAPRNYSRSGGFKEGRAGFRPVEAGGQHGGRSGETVKHEISYR  
SRRLEQTSVRDPSPEADAPVLGSPKEEAASEPPAAAPDAAPPPDRPIEKKSYSRARRTRTKVGDAVKL  
AEVPPPPPEGLIPAPVPVETTPPTPTKTGTWEAPVDSSTSGLEQDVAQLNIAEQNWSPGQPSFLQPRELR  
GMPNHIMGAGPPPPQFNRMEEEMVGQGRAKRYSSQRQRPVPEPPAPFVHISIMEGHYYDPLQFGQPIYTH  
GDSAPLPPQGMIVQPEMHLPHFGLHPHQTAPLPLNPGLYPPPVSMSPGQPPPPQQLLAPTYFSAPGVMNFG  
GNPSYYPAPGALPPPPPHLYPNTQAPSQVYGGVTTYNPAQQQVQPKPSPPRRTPQPVTIKPPPEVVSR  
GSS

## Pongo abelii:

>XP\_024090145.1 protein CASC3 [Pongo abelii]  
MADRRRQRASQDTEDEESGASGSDSGGSPLRGGGSCSGSAGGGGSGSLPSQRGGRIGALHLRRVESGGAK  
SAEESCESEDGIEGDAVLSDYESAEDSEGEEGYSEENSKVELKSEANDAVNSSTKEEKGEKPDTKS  
TVTGE**RQSGDQGL**STEPVENKVGGKPKHLDDDEDRKNPAYIPRKGLFFEHLRGQTQEEEVVRPKGRQRK  
LWKDEGRWEHDKFREDEQAPKSRQELIALYGYDIRSAHNDDIKPRRIKPRYGSPPQRDPNWNGERLNK  
SHRHQGLGGTLPPrTFINRNAAGTGRMSAPRNYSRSGGFKEGRAGFRPVEAGGQHGGRSGETVKHEISYR  
SRHLEQT<sup>1</sup>PVDRDPSPEADAPVLGSPKEEAAAPAAAPDAAPPPDRPIEKKSYSRARRTRTKVGDAVKLAE  
EVPPPPPEGLIPAPVPVETTPPTPTKTGNWEAPVDSTTGGLEQDVAQLNIAEQSWSPGQPSFLQPRELRGM  
PNHIMGAGPPPPQFNRMEEEMVGQGRAKRYSSQRQRPVPEPPAPFVHINIMEGHYYDPLQFGQPIYTHGD  
SPAPLPPQGMIVQPEMHLPHFGLHPHQTAPLPLNPGLYPPPVSMSPGQPPPPQQLLAPTYFSAPGVMNFGN  
PSYYPAPGALPPPPPHLYPNTQAPSQVYGGVTTYNPAQQQVQPKPSPPRRTPQPVTIKPPPEVVSRGS  
S

## Mus musculus:

>NP\_619601.2 protein CASC3 [Mus musculus]  
MADRRRQRASQDTEDEESGASGSDSGSPARGGGSCSGSVGGGGGSLPSQRGGRGGGLHLRRVESGGAKS  
AEESCESEDGMGEDAVLSDYESAEDSEGEEDYSEENSKVELKSEANDAADS<sup>1</sup>SAKEKGEEKPESKGTVT  
GE**RQSGDQGL**STEPVENKVGGKPKHLDDDEDRKNPAYIPRKGLFFEHLRGQTQEEEVVRPKGRQRLWK  
DEGRWEHDKFREDEQAPKSRQELIALYGYDIRSAHNDDIKPRRIKPRFGSSPQRDPNWIGDRSSKSHR  
HQGGPGNLPPrTFINRNTAGTGRMSASRNYSRSGGFGDGRTSFRPVEVAGQHGGRSAETLKHEASYSRR  
LEQT<sup>1</sup>PVDRDPSPEPADPLLGSPKEEVA<sup>2</sup>SETPAAVPDITPPAPDRPIEKKSYSRARRTRTKVGDAVKAEE  
VPPSEGLASTATVPETTPAAKTGNWEAPVDSSTTGGLEQDVAQLNIAEQSWSPGQPSFLQPRELRGVPNH  
IMGAGPPPPQFNRMEEEMVGQGRAKRYSSQRQRPVPEPPAPFVHISIMEGHYYDPLQFGQPIYTHGDSPA  
PLPPQGMIVQPEMHLPHFGLHPHQSFGPLPNPGLYPPPVSMSPGQPPPPQQLLAPTYFSAPGVMNFGNPNY  
PYAPGALPPPPPHLYPNTQAPPQVYGGVTTYNPAQQQVQPKPSPPRRTPQPVSIKPPPEVVSRGSS

## Gallus gallus:

>XP\_046789397.1 protein CASC3 isoform X6 [Gallus gallus]  
MADRRRQRASQDSEDDSDSAASDSGDSAASAARSRS<sup>1</sup>SGSASPRPSHRPPRGAAGALSAGPRGRGADSAAGG  
GAAKSAPQSECESEDGIEGDAVLSDYESAEDSEAEEDYSEESAKVELKQDSNGSCSAAKAEKGDEKP  
DSKGAVTGE**RQSGDQGL**STEPVENKVGGKAPKHLDDDEDRKNPAYIPRKGLFFEHLRGQTQEEEVVRPKG  
RQR<sup>2</sup>LWKDEGRWEHDKFREDEQAPKTRQELIALYGYDIRSAHNDDIRPRMRKPRFGSPQRDPNWSNER  
PNKPRRHQGTGDTSAPRPTFTTSRSAGTGRMPPPRNYPRVGGYKESRPGYRASEVSAQPSRNGEQSKQES  
GYRAKRAEQSPPRKKSFEVEAVHIHGSFVKEEGALENQDAAQPPPPDRPIEKKSYSRARRTRTKAGDAGK  
LADDVPALEAPATPKPIQ<sup>3</sup>AETSPPPAKSSNWESPVESGLDGLQEMIQMNLTQ<sup>4</sup>QNWSPGQSQTQPRELR  
GIPNHMHVGTGPPPPQFNRMEEEMAVQGGRVKRYSSQRQRPVPEPAPFVHISIMEGHYYDPLQFGQPIYTH  
GENPAPLPPQGMIVQPEMHLPHFGLHPHQTAPMANPGLYPPPVSMPPGQPPPPQQLLAPTYFSPPGVMMNF  
GNPGYPPPGALPPPPPHLYPNTQAQSQVYGGVTTYNTVQQQVQPKPSPPRRTSQPVTIKPPPEVVSR  
APVNLSE

## Xenopus laevis:

>AAH47246.1 MGC54001 protein [Xenopus laevis]  
MADRRRRRRRASQDSEELGEEEEASDSAGSGGESVGP<sup>1</sup>IRQERAEQSKTEPARAEQETRRAEPAREGKES  
ECESEDGIEGDAVLSDYESADESEEEEAHNSEEDPLKTTLKQENNVEEAPATREQKPKSKGAVTGE**RQSG  
DQGL**STEP<sup>2</sup>EENN<sup>3</sup>TSKKSKQLDDDEDRKNPAYIPRKGLFFEHLRGHVNDDEVVRPKGRHPRKLWKDEGRW  
VH<sup>4</sup>DRFREDEQAPKSRRELVSIYGYDIRSCRNP<sup>5</sup>EEIHPRRPCKPRFSSPSRREENDEKPSRPSNRYQDSGV  
TQPLRPY<sup>6</sup>TNRNAPPSSKVGPSRTYSRQGGYKENRASYQSEEEAAPHTYERRQDYGGHRSRSTDQGFPPPR  
EYSPEADPIIKEEAFTEKQTAEPSPPPPDRPVEKKSYSRARRSRIKVGDAKSMEDTTAAELPPPPFVPP  
AVAAETPAPLNVKQGNWEPPAEGGMSGIDEELSKMNLSEQSWNQGPAYISPRGIPNPMHMGAGPPQYS  
RMESMAVQAGRVKRYSSQRQRPVDPDPAAMHISLMESHYYDSLQFGQPIYAHGDS<sup>7</sup>SSPSMP<sup>8</sup>PPQGMIVQPEMH  
LSHPGMHPHQS<sup>9</sup>PATISTPNIYPAVSLTPGQPPPPQLLPPPYFTAPS<sup>10</sup>NVMNFGNPTYYPYPGALPPPPAH  
LYPNAQAQSQVYGGVTTYNFVQQVQQQVLKPKSPPRRTSQPVTIKPPPEPEPQSLFVALTF

## Salmo salar:

>XP\_014047999.1 protein CASC3-like [Salmo salar]  
MADRRRRRRRASQDSEEDDESCSGSESGKSLSTTKPRVRDPEPVEAPVRVVPKND<sup>1</sup>AESECESEDGVGE  
AVLSDYESADPEENGSHSEGGEEEEVVPPPAEPKPSPAADTPAAEGELQEGGGKEEGEKGVSK<sup>2</sup>EVKCE  
DKGNLAGE**RQSGDQGL**STEDSENKGA<sup>3</sup>KPQKQLDDQDRNNPAYIPRKGMFFEHDVRGNQAQEEERPKGRNR  
KLWKDEGRWEH<sup>4</sup>DRFREEQAPKSR<sup>5</sup>EELVAIYGYDIRNGGVSNERSYRQRKPRHSTSPVRDKRWRDGDGER  
PIHTSWQGGGNSNRSAPLAVALQQSGPPPSAA<sup>6</sup>PNTQRNNNPPRPSSHP<sup>7</sup>PPRGFGQNRPPQAQYRNDNRQ  
ESQRPFGKAHPAELQTRSLPMDGERGPRGRGNRGAHTERS<sup>8</sup>SSVVVEEIRSEEDDERNTT<sup>9</sup>TVT<sup>10</sup>SVYHN  
RHYSGKDRERD<sup>11</sup>SAPRRQ<sup>12</sup>QRRGGSAPADNPVTRDASPAERPV<sup>13</sup>EEKSSYLARRTRTRATELDKQASLE  
EPASTASSALTSE<sup>14</sup>PWQPGQSQGDAGDSSQATVLTGLDQDLARLSLAGQNWQNPS<sup>15</sup>SFLRAEMRGIPNS  
MHMGAGPPQYSNIEELGAGNRAKRYSSQRQRPSEPA<sup>16</sup>PMHIGVMESHYYE<sup>17</sup>PMYQ<sup>18</sup>GPIYAHGDSAPL<sup>19</sup>PF

PQGMVLVQPEMHLPHPGHPGHPGLHHPQSSGMPMPALYAAPPVSMSPGQPPFQQLLAPPFYPPPGVMTFG  
NTNYPYPAGATLPPMYPNPPAQSQVYGQSQVYGGVTYYDFMQQQAQPKSPPRRSSQFVTVKPPPEVGYG  
PE

### **Petromyzon marinus:**

>XP\_032831431.1 protein CASC3 isoform X2 [Petromyzon marinus]  
MADRRRRRTGASQDSDEEEDEEEESDLSPGRCPEKAAATPARAAESECESECVPERDGVVLSGYESADDN  
YSHYSEDEKEEEEGSCSVTDDDEVAEEGSSVPPAITGVVAGEKIASTPADKRPERPHRV**RKPSHGSQ**EAFE  
DDAPPTGAGGKNSKRDEEEEDQKNPAFVPRKGLFFEHDIRGGNNKEDARAKVHNRKLWRDAGRWEHDFR  
EDEQAPKSREELVALYGYDIRSGAHADDARPLRRPRYRSPTGRWSRESPPVNRGPYQAPKREPVERPARL  
RDEDRDTERRPAPRRPGPTTAGPAALPGRPRAYVEQRAYVEPRARAHTQGDSSRDQPPGTPAARDGARSS  
PQRHQQRHQHNGNGEEEGEKRAEILSAGTEAEVGARGAPAAAAAATVAPATGDAAFAVDLAQDKAPER  
KSYSRVRRLRNKPSELPGQASTTDPVSPAPLAAPAPSTVPLVALPETQAATALPHQHNPQQLQQLQPQAP  
PLKPLGERTRIAALLPQPLWDVPVLEPSFVGRLEHGMACIISLGQTNWPGAQPHYLPTQREHRGGATHLP  
VNSVPPFFNRIEDLGGQAGRAKRYSSQSRSPVPEPHPTPPMHIPLIEGSIYDPNTAYQAPLYGHGGDSFA  
AIPFQGIWQPDNLNPHGLHHPQSPHMYAPPVSMATGQPPPPGQMLGYFPSNIMYPGAALPNPGYTYT  
PAPIPPPPPPAHFPPPPAQSQVYGGVTYYNTAQQAQPKSPPRRPSQPVSVKPPPEEGQAEKKE

### **Branchiostoma belcheri:**

>XP\_019629453.1 PREDICTED: protein CASC3-like [Branchiostoma belcheri]  
MADRRRRRPSESEGEEGEETLSTSQASLGSTEDPSHSGEDDRDRQSPCESEGEHAEALSEYESAEEDRA  
GEADESQAEQGDSDTEHEDTRADDDTETEDTQETSEETQETGDTROLDTSKSTVSTDGSDKGKKLE**KCS**  
**GTGSE**APDSEDQAEENLDDDDRNPAPFIPRKGDFFEHDIRGEEDDKQGRPPVKGRKLWQDEGKWQHD  
FNEDEQRPKPVEELIAIYGYDPRRESSPDNIRPRRGRPPRGGGRGGRPPPTLRDFVERPPPPRRGFFP  
RNRTDVQTRNRAQYTDQVQRWAANTNNYRDNGPLDNVSDENRNQPEVSRQKPSVEQAVPNVINNVPSNP  
MPKNSENGVTVAPMPVKAPTSTESEHQHPAPQEKRSYTRYRRSTQAPRTSPFQQQNIKRKMENLSLQPG  
ESVAQDRGHADGSPQHPEERHGPNRSDRPKRYSSLRQRPMEQVVPFNMVKGVTYYNQGYRGEQFARGST  
PFVVDGFIQPHPTGPPAPPHQGMIVSDVNLPPGMAHPAMYNPAMTMAPVPPQLLPPFFSAGGMVNYAA  
APNPVSSYAPIFQAGPTAPTNPVPPVYTSPPHPSAQVVRGVTYFNNQMPPQVLKRSPPARRNAAIPIEPP  
PDVRGDTASEEGAQTPEA

### **Drosophila melanogaster:**

No homolog found.

### **Hydra vulgaris:**

No homolog found.

### **Nematostella vectensis:**

No homolog found.

### **Amphimedon queenslandica:**

No homolog found.

## Alignment

```
XP_019629453.1[B.belcheri] MADRRRRRPFSESEGEEGEE--ETLSTSQASLGST----- 32
XP_032831431.1[P.marinus] MADRRRRRT--GASQDSDEEEDEEEE--ESDLSGPRG----- 32
XP_014047999.1[S.salar] MADRRRRRRRASQDSDEEDDESGSGSESGKSLSPPTK-----PRVRD----- 41
AAH47246.1[X.laevis] MADRRRRRRRASQDSSEELG--EEEEASDSDAGSGGGE---SVGPTRQERAEQSKT--EP- 51
XP_046789397.1[G.gallus] MADRRRRQR--ASQDSEDDSDSAA--SDSGDSAASAARSRSGSASPRPSHRPPRGAAGALSA 57
NP_619601.2[M.musculus] MADRRRRQR--ASQDTEDEESGASGSDS--GSPARGGGSCSGSVG-----GGGSGSLPS 49
NP_031385.2[H.sapiens] MADRRRRQR--ASQDTEDEESGASGSDSGGSPLRGGGSCSGSAG-----GGGSGSLPS 50
XP_024090145.1[P.abelii] MADRRRRQR--ASQDTEDEESGASGSDSGGSPLRGGGSCSGSAG-----GGGSGSLPS 50
*****: *: : : *

XP_019629453.1[B.belcheri] -----EDPSHSGEDDRDRQSPCESEGEH---AEALSEYESAEEDRAGEADEDQA 79
XP_032831431.1[P.marinus] -----PE-----KAAAI PARAAESECSEGVPERDGVVLSGYESADDNYSHYSEDEKEE 81
XP_014047999.1[S.salar] -----PEPVEAPAVRVVFPKNDASECESEDGV-GE-AVLSDYESADPEENGSHSEGGEE 93
AAH47246.1[X.laevis] -----ARAEQETRAEPAREGKESECESEDGIEGD-AVLSDYESADEEEEEAHNSEED 104
XP_046789397.1[G.gallus] GPRGRG---ADSAAGGGAASAPQSECESEDGIEGD-AVLSDYESAEDSEAEEDYSEEE 113
NP_619601.2[M.musculus] QRGGRGGGLHLRRVESGGAKSAEESCESEDGMGEG-AVLSDYESAEDSEEGEE--DYSEEE 107
NP_031385.2[H.sapiens] QRGGRGTALHLRRVESGGAKSAEESCESEDGIEGD-AVLSDYESAEDSEEGEEGYSEEE 109
XP_024090145.1[P.abelii] QRGGRIGALHLRRVESGGAKSAEESCESEDGIEGD-AVLSDYESAEDSEEGEEGYSEEE 109
*: * * * * . * * * * :

XP_019629453.1[B.belcheri] EQGDSSTEHEDTR---ADDDTETEDTQET--SEETQETGDRDLDT-SKSTV----- 125
XP_032831431.1[P.marinus] EEGSCSVTD-----DEV-----AEEGS-----SVPPAITGVVAGEKIATST 116
XP_014047999.1[S.salar] EEVVVPPAAEPKPSPAADTPAAEGELQEGGGKEEGKGVSKVCEDKGNLAGERQ--- 150
AAH47246.1[X.laevis] PLKTTT-----K-----QENNVEEAP---ATREQPKPSKGAVTGERQ--- 138
XP_046789397.1[G.gallus] SAKVEL-----K-----QDSNGSCESAIAEKGDGKPSKGAVTGERQ--- 151
NP_619601.2[M.musculus] NSKVEL-----K-----SEANDAADSSA-KEKGEEKPESKGTVTGERQ--- 144
NP_031385.2[H.sapiens] NSKVEL-----K-----SEANDAVNSSTKEEKGEKPDTKSTVTGERQ--- 147
XP_024090145.1[P.abelii] NSKVEL-----K-----SEANDAVNSSTKEEKGEKPDTKSTVTGERQ--- 147
: . :

XP_019629453.1[B.belcheri] -STDGS DKGKLE RQSGDGS EAPDSED-----QAENLDDDDRRNPAFIPRKGDFFE 176
XP_032831431.1[P.marinus] PADKRPERPHRV RKP SHGS QEAPEDDAPPTGAGGKNSKRDEEEEDQKNPAFVPRKGLFFE 176
XP_014047999.1[S.salar] -----SGDGGQSTEDSE--NKGAKP-GQKLDDQDRNNPAYIPRKGMFFE 192
AAH47246.1[X.laevis] -----SGDGGQSTEPVE--NNTSKKSQKQLDDDEDKKNPAYIPRKGLFFE 181
XP_046789397.1[G.gallus] -----SGDGGQSTEPVE--NKVGKKAPKHLDDDEDKKNPAYIPRKGLFFE 194
NP_619601.2[M.musculus] -----SGDGGQSTEPVE--NKVGKKGPKHLDDDEDKKNPAYIPRKGLFFE 187
NP_031385.2[H.sapiens] -----SGDGGQSTEPVE--NKVGKKGPKHLDDDEDKKNPAYIPRKGLFFE 190
XP_024090145.1[P.abelii] -----SGDGGQSTEPVE--NKVGKKGPKHLDDDEDKKNPAYIPRKGLFFE 190
* . . . : : . : : * : * * * * *

XP_019629453.1[B.belcheri] HDIRGEEDDKQGGRPVFKRRKLWQDEGKWQHDLFNEDEQRKPFVEELIAIYGYPDRRES 236
XP_032831431.1[P.marinus] HDIRGGNNKE-DARAKVHN--RKLWRDAGRWEHDFREDEQAPKSREELVALYGYDIRSGA 234
XP_014047999.1[S.salar] HDVVRGNAQEE--ERP KGRN--RKLWKDEGRWEHDFREDEQAPKSREELVAIYGDIRNGG 249
AAH47246.1[X.laevis] HDLRGHVNDE-EVRPKGRHPRKLWKDEGRWVHDFREDEQAPKSREELVSIYGDIRSCR 240
XP_046789397.1[G.gallus] HDLRGQTQEE-EVRPKGRQ--RKLWKDEGRWEHDKFREDEQAPKTRQELIALYGYDIRSAH 252
NP_619601.2[M.musculus] HDLRGQTQEE-EVRPKGRQ--RKLWKDEGRWEHDKFREDEQAPKSRLQELIALYGYDIRSAH 245
NP_031385.2[H.sapiens] HDLRGQTQEE-EVRPKGRQ--RKLWKDEGRWEHDKFREDEQAPKSRLQELIALYGYDIRSAH 248
XP_024090145.1[P.abelii] HDLRGQTQEE-EVRPKGRQ--RKLWKDEGRWEHDKFREDEQAPKSRLQELIALYGYDIRSAH 248
**:* : : * : * * * * * : * * * * : * * * *

XP_019629453.1[B.belcheri] SPDNIRPRRGRPPRGGRG---GGRPPPRRTL----- 264
XP_032831431.1[P.marinus] HADDARPLR--RPRYRST---GRWSRESFPVNRGPYQAPKREPVE--RPARLRDEDRT 287
XP_014047999.1[S.salar] VSNE-RSYRQKPRHSTSPVRDKWRDGDGERPIHTSWQGGGNSNSRSLAVALQQSGP 308
AAH47246.1[X.laevis] NP EEIHPRRPGKPRFSSPSRREEN--DEKPSRPSNRYQ-DSGVT---QPL----- 284
XP_046789397.1[G.gallus] NPDDIRPRMRKPRFGS--PQRPDPNWSNERPNKPPRHQGTGTS---APP----- 297
NP_619601.2[M.musculus] NPDDIKPRRIRKPRFGSSPQRPDPNWI GDRSSKSHRHQGTGTS---LPP----- 290
NP_031385.2[H.sapiens] NPDDIKPRRIRKPRYGSPPQRPDPNWNGERLNKSHRHQGTGTS---LPP----- 293
XP_024090145.1[P.abelii] NPDDIKPRRIRKPRYGSPPQRPDPNWNGERLNKSHRHQGTGTS---LPP----- 293
: : * : *

XP_019629453.1[B.belcheri] -----RDFVERPPPP--RRGFPPRNRDVTQTRNRAQYTQDVQR-----WAANTNNY 308
XP_032831431.1[P.marinus] ERRPAPRRPGPTTAGPAALPGRPAYVE-----QRAYVEPRARAHTQ-GDS-----S 333
XP_014047999.1[S.salar] PPSAAPTQQRNNPPRPSSHPPRGFQGNR-PPQAQYRNDNRNQESQRP GPKAHPAEPLQT 367
AAH47246.1[X.laevis] -----RPYTNRNAPSSKVPSPRTYSR-----QGGYKEN-----RASYSQSEE----- 321
XP_046789397.1[G.gallus] -----RTFTSRSSACTGRMPPPRMYPR-----VCGYKES-----RPGYRASE----- 334
NP_619601.2[M.musculus] -----RTFINRNTAGTGRMSASRNYSR-----SGGFKDG-----RTSFRPVE----- 327
NP_031385.2[H.sapiens] -----RTFINRNAAGTGRMSAPRNYSR-----SGGFKEG-----RAGFRPVE----- 330
XP_024090145.1[P.abelii] -----RTFINRNAAGTGRMSAPRNYSR-----SGGFKEG-----RAGFRPVE----- 330
. * : :

XP_019629453.1[B.belcheri] RDNGPLDN-----VVS DENRNQPEVSRQKPSVEQ-----AVPNV---I--- 343
XP_032831431.1[P.marinus] RDQPPG-----T-PAARDGARSSPQRHQQRHQHNGNGEEEGEKRAEILS-AGTE--- 381
XP_014047999.1[S.salar] RSLPMDGGERGPRGRGNRGAHTERSSSVV-----VEEIRSEEDDERNTTTVTTSVYHNR 421
AAH47246.1[X.laevis] -----EAAPTYERR-----QDY-----GGHRSR 340
XP_046789397.1[G.gallus] -----VSAQP-SRNGEQS-----KQE-----SGYRSR 355
NP_619601.2[M.musculus] -----VAGQHGGRS AETL-----KHE-----ASYRSR 349
NP_031385.2[H.sapiens] -----AGGQHGGRSGETV-----KHE-----ISYRSR 352
XP_024090145.1[P.abelii] -----AGGQHGGRSGETV-----KHE-----ISYRSR 352
. .

XP_019629453.1[B.belcheri] -----NNVPSNPMPKNSE-----NGVTVAPMPVKAPTSTESEHQHPAPQEKRSY 387
XP_032831431.1[P.marinus] -----AEVGARGAPAAAAAATVAPA--TGDAAFVADLAQDKAPERKSY 423
XP_014047999.1[S.salar] HYSKGKDREDRSAPRRQ-----EQQ-RGGSAPPA--DNFVTRDASAPAPERVVEKSY 470
AAH47246.1[X.laevis] STDQGPPPPPREYSPEADPI-----IKE-EAFTE--K---QTAEPSPPPPDRPVEKSY 387
XP_046789397.1[G.gallus] RAE--QSPPRDKSPEVEAVHIHGSVPKE-EGAL--E---NQPDAAQPPPPDRPIEKSY 405
NP_619601.2[M.musculus] RLE--QTPVRDPSPEADAP-VLGSPEKE-EVASETPA---AVPDITPPAPDRPIEKSY 401
NP_031385.2[H.sapiens] RLE--QTSVRDPSPEADAP-VLGSPEKE-EAASEPFA---AAPDAAPPPPPDRPIEKSY 404
XP_024090145.1[P.abelii] HLE--QTPVRDPSPEADAP-VLGSPEKE-EAAS--PA---AAPDAAPPPPPDRPIEKSY 402
* : *

XP_019629453.1[B.belcheri] TRYRRSTQAPRTSPFQ----- 403
XP_032831431.1[P.marinus] SRVRLRNKPSLPGQASTTDPVSPAPLAAPASTVPLVALPETQAATALPHQHNPPQQLQ 483
```

|                            |                                                               |     |
|----------------------------|---------------------------------------------------------------|-----|
| XP_014047999.1[S.salar]    | SLARRTRTRATELDKQASLEEP-----AS-----TAS-----                    | 497 |
| AAH47246.1[X.laervis]      | SRARRSRIVGDAGKSMEDTTAAEL-PPPPVPP--AVAAEFTPA-----              | 429 |
| XP_046789397.1[G.gallus]   | SRARRTRVKAGDAGKLADDVPALEA-PAT----P---KP-IQAETS-----           | 442 |
| NP_619601.2[M.musculus]    | SRARRTRTKVGDAVKAAEEVPPFSE-GLA----S---TATVPETTP-----           | 439 |
| NP_031385.2[H.sapiens]     | SRARRTRTKVGDAVKAAEEVPPFPE-GLI----P---APPVPETTP-----           | 442 |
| XP_024090145.1[P.abelii]   | SRARRTRTKVGDAVKAAEEVPPFPE-GLI----P---APPVPETTP-----           | 440 |
|                            | : **                                                          |     |
| XP_019629453.1[B.belcheri] | -----QONIRKRMENLSL-                                           | 416 |
| XP_032831431.1[P.marinus]  | LQQPQAPPLKPLGERTRPIAALLPQPLWDVPVL-----EPSPVGRLEHGMQISL-       | 533 |
| XP_014047999.1[S.salar]    | -----SSALTSEPWQGFQSQSDAGDSSQATVLTGLDQDLARLSLA                 | 538 |
| AAH47246.1[X.laervis]      | -----FLNVKQGNWEPP-----AEGGMSGIDEELSKMNLS                      | 459 |
| XP_046789397.1[G.gallus]   | -----PPAKSSNWESP-----VESGLDGLQEQMIQMNLT                       | 472 |
| NP_619601.2[M.musculus]    | -----AAKTGNWEAP-----VDSTTGGLEQDVAQLNIA                        | 467 |
| NP_031385.2[H.sapiens]     | -----TPPTKTGTWEAP-----VDSTTGGLEQDVAQLNIA                      | 472 |
| XP_024090145.1[P.abelii]   | -----TPPTKTGNWEAP-----VDSTTGGLEQDVAQLNIA                      | 470 |
|                            | : . : . : .                                                   |     |
| XP_019629453.1[B.belcheri] | ----QPGEESVAQD-RGHADGSPQHPEERH-----GPNRSDRPKRYSSLRQRM         | 460 |
| XP_032831431.1[P.marinus]  | GQTWNPGAQPHYLPTQREHRGGATHLPVNSVP-PFFNRIEDLGGQAGRAKRYSSQSRSPV  | 592 |
| XP_014047999.1[S.salar]    | GQNWAQNPSSFLR---AEMRGLPNSMHMGAP-PQYSNIEELGA-GNRAKRYSSQQRQPS   | 593 |
| AAH47246.1[X.laervis]      | EQSWNGQGPAYISP-----RGIPNFMHMGAGP-PQYSRMEGMAVQGRVKRYSSQQRQPV   | 513 |
| XP_046789397.1[G.gallus]   | EQNWSFGQSQFIQP--RELRGIPNHHMVGTPPPQFNRMEEMAVQGGRVKRYSSQQRQRP   | 530 |
| NP_619601.2[M.musculus]    | EQSWSPGQPSFLQP--RELRGVFNHIMHAGPPPPQFNRMEEMGVQSGRAKRYSSQQRQRPV | 525 |
| NP_031385.2[H.sapiens]     | EQNWSFGQPSFLQP--RELRGMPNHHMAGPPPPQFNRMEEMGVQSGRAKRYSSQQRQRPV  | 530 |
| XP_024090145.1[P.abelii]   | EQSWSPGQPSFLQP--RELRGMPNHHMAGPPPPQFNRMEEMGVQSGRAKRYSSQQRQRPV  | 528 |
|                            | . * . . * . * . *                                             |     |
| XP_019629453.1[B.belcheri] | PEQVVPNNMVKGV---TYYNQ--GYRGEQFARGSTPPVVDGPIQPHFTGPPAPPHQGMIV  | 515 |
| XP_032831431.1[P.marinus]  | PEPHTPPMHIPLIEGSYYDPNTAYQAPLYGHGG-----DSPAAIPFQGMIV           | 639 |
| XP_014047999.1[S.salar]    | PE--PAPPMHIGVMESHYYEPM-SYQGPIYAHG-----DSPAPLPFQGMIV           | 636 |
| AAH47246.1[X.laervis]      | PDP-A--AMHISLMESHYYDSL-QFQGPITYAHG-----DSSPSMPPQGMIV          | 555 |
| XP_046789397.1[G.gallus]   | VPE-PAPPMHISIMEGHYYDPL-QFQGPITYTHG-----ENPAPLPFQGMIV          | 574 |
| NP_619601.2[M.musculus]    | PEP-PAPPVHISIMEGHYYDPL-QFQGPITYTHG-----DSPAPLPFQGMIV          | 569 |
| NP_031385.2[H.sapiens]     | PEP-PAPPVHISIMEGHYYDPL-QFQGPITYTHG-----DSPAPLPFQGMIV          | 574 |
| XP_024090145.1[P.abelii]   | PEP-PAPPVHINIMEGHYYDPL-QFQGPITYTHG-----DSPAPLPFQGMIV          | 572 |
|                            | : : * : : : * : * * : *                                       |     |
| XP_019629453.1[B.belcheri] | S-DVNLP-----PGMAHPAMYN-PAMTMA--PPVPPQLLPPPPFSAGGM             | 555 |
| XP_032831431.1[P.marinus]  | QDNLNLPH-----PGLHPHQSPTHM---Y-APPVSMATGQPPPPQMLG-YFP--SN      | 684 |
| XP_014047999.1[S.salar]    | QPEMHLPHGHPGHPGLHPHQSSGMPNPAALYAAPVSMSPGQPPQQLLAPFFYPPP-G     | 695 |
| AAH47246.1[X.laervis]      | QPEMHLSH-----PGMHPHQSPATISTPNIYP-APVSLTPGQPPPPQQLLPPPYFTAPSN  | 608 |
| XP_046789397.1[G.gallus]   | QPEMHLPH-----PGLHPHQTPAPMANFGLYP-PPVSMPPGQPPPPQQLLAPTYFSPP-G  | 626 |
| NP_619601.2[M.musculus]    | QPEMHLPH-----PGLHPHQSPGFLPNFGLYP-PPVSMSPGQPPPPQQLLAPTYFSAP-G  | 621 |
| NP_031385.2[H.sapiens]     | QPGMNLPH-----PGLHPHQTPAPLPNFGLYP-PPVSMSPGQPPPPQQLLAPTYFSAP-G  | 626 |
| XP_024090145.1[P.abelii]   | QPEMHLPH-----PGLHPHQTPAPLPNFGLYP-PPVSMSPGQPPPPQQLLAPTYFSAP-G  | 624 |
|                            | . : : * : : * : : : * * : : :                                 |     |
| XP_019629453.1[B.belcheri] | VNYA--AAPNVSSYAPIPQAGPTAPTNNVPPVYTSHPHPSAQVVRGVTYFNNQMPP---   | 610 |
| XP_032831431.1[P.marinus]  | IMYPGAALPNPGYTYTPAPI-----PPPPPPPAHIFPPPAQSQVYGGVTYYNPAQQQ---  | 737 |
| XP_014047999.1[S.salar]    | VM---TFGNTNYPYPAGAT---LPP-MYNPPAQSQVYGGVTYYNPAQQQ---          | 743 |
| AAH47246.1[X.laervis]      | VM---NFGNPTYYPYPGAL---PP---PPAHLYPNAQAQSQVYGGVTYYNPAQQQ---    | 657 |
| XP_046789397.1[G.gallus]   | VM---NFGNPGYPYPGAL---PPP---PPPHLYSNTQAQSQVYGGVTYYNPAQQQ---    | 673 |
| NP_619601.2[M.musculus]    | VM---NFGNPNYPYPGAL---PPP---PPPHLYPNTQAQSQVYGGVTYYNPAQQQ---    | 668 |
| NP_031385.2[H.sapiens]     | VM---NFGNPSYPYPGAL---PPP---PPPHLYPNTQAQSQVYGGVTYYNPAQQQ---    | 673 |
| XP_024090145.1[P.abelii]   | VM---NFGNPSYPYPGAL---PPP---PPPHLYPNTQAQSQVYGGVTYYNPAQQQ---    | 671 |
|                            | : * * * * *                                                   |     |
| XP_019629453.1[B.belcheri] | -QVLKRSPPARRPNAAPIEPPDPVRGDPTASEEGAQPT                        | 649 |
| XP_032831431.1[P.marinus]  | -AQPKPSPPRRPSQPVSVKPPPEEGQAEKE-----                           | 767 |
| XP_014047999.1[S.salar]    | -AQPKPSPPRRSSQPVTVKPPPEVGYGPE-----                            | 772 |
| AAH47246.1[X.laervis]      | -QVLKPSPPRRTSQPVTIKPPPEEQSL-FVALTF----                        | 691 |
| XP_046789397.1[G.gallus]   | -VQPKPSPPRRTSQPVTIKPPPEVVSRAVNLSE----                         | 707 |
| NP_619601.2[M.musculus]    | -VQPKPSPPRRTPQPVSIKPPPEVVSARGSS-----                          | 698 |
| NP_031385.2[H.sapiens]     | -VQPKPSPPRRTPQPVTIKPPPEVVSARGSS-----                          | 703 |
| XP_024090145.1[P.abelii]   | -VQPKPSPPRRTPQPVTIKPPPEVVSARGSS-----                          | 701 |
|                            | * * * * : : * *                                               |     |
