# Supplementary material for: An Evolutionary Perspective on the Origin, Conservation and Binding Partner Acquisition of Tankyrases
Source: MDPI journal article supplement (doi:10.3390/biom12111688), 2022-11-15
Supplement: s1 [file s1]

# GMD

## Homo sapiens:

```
>AAC13553.1 GDP-mannose 4,6 dehydratase [Homo sapiens]
MAHAPARCPSA[RGSGDGE]GKPRNVALITGITGQDGSYLAEFLLLEKGYEVHGIIVRRSSSFNTGRIEHLKYNPQAHIEGNMKLHYGDLTDSTCLVKIINEVKPTEIYNLGAQ
SHVKISFDLAEYTADVGVGTLRLLDVAVKTCGLINSVKFYQASTSELYGKVQEIIPQKETTPFYPRSPYGAAKLYAYWIVVNFREAYNLFAVNGILFNHESPRRGANFVTRK
ISRSVAKIYLGQLECFSLGNLDAKRDWGHAKDYVEAMWMLQNDEPEDFVIATGEVHSVREFVEKSFHLHIGKTIWEGKNENEVGRCKETGKVHVTVDLKYRPTDEVDFLQ
GDCTKAKQKLNWKPRVAFDELVREMVDVDELMLRNTNPA
```

## Pongo abelii:

```
>XP_002816391.1 GDP-mannose 4,6 dehydratase [Pongo abelii]
MAHAPARCPSA[RGSGDGE]GKPRNVALITGITGQDGSYLAEFLLLEKGYEVHGIIVRRSSSFNTGRIEHLKYNPQAHIEGNMKLHYGDLTDSTCLVKIINEVKPTEIYNLGAQ
SHVKISFDLAEYTADVGVGTLRLLDVAVKTCGLINSVKFYQASTSELYGKVQEIIPQKETTPFYPRSPYGAAKLYAYWIVVNFREAYNLFAVNGILFNHESPRRGANFVTRK
ISRSVAKIYLGQLECFSLGNLDAKRDWGHAKDYVEAMWMLQNDEPEDFVIATGEVHSVREFVEKSFHLHIGKTIWEGKNENEVGRCKETGKVHVTVDLKYRPTDEVDFLQ
GDCTKAKQKLNWKPRVAFDELVREMVDVDELMLRNTNPA
```

## Mus musculus:

```
>NP_666153.1 GDP-mannose 4,6 dehydratase [Mus musculus]
MAQAPAKCPSYPGSGDGEKGKLRKVALITGITGQDGSYLAEFLLLEKGYEVHGIIVRRSSSFNTGRIEHLKYNPQAHIEGNMKLHYGDLTDSTCLVKIINEVKPTEIYNLGAQ
SHVKISFDLAEYTADVGVGTLRLLDVAVKTCGLINSVKFYQASTSELYGKVQEIIPQKETTPFYPRSPYGAAKLYAYWIVVNFREAYNLFAVNGILFNHESPRRGANFVTRK
ISRSVAKIYLGQLECFSLGNLDAKRDWGHAKDYVEAMWMLQNDEPEDFVIATGEVHSVREFVEKSFHIGKTIWEGKNENEVGRCKETGKVHVTVDLKYRPTDEVDFLQ
GDSCSAQQKLNWKPRVAFDELVREMVDVDELMLRNTNPA
```

## Gallus gallus:

```
>XP_015137673.1 GDP-mannose 4,6 dehydratase isoform X1 [Gallus gallus]
MGDKKVALITGITGQDGSYLAEFLLLEKGYEVHGIIVRRSSSFNTGRIEHLKYNPQAHIEGNMKLHYGDLTDSTCLVKIINEVKPNEIYNLGAQSHVKISFDLAEYTADVGV
GTLRLLDVAVKTCGLINSVKFYQASTSELYGKVQEIIPQKETTPFYPRSPYGAAKLYAYWIVVNFREAYNLFAVNGILFNHESPRRGANFVTRKISRSVAKIHLGQMDSFSLG
NLDKRDWGHARDYVEAMWMLQTDDEPEDFVIATGEVHSVREFVEKSFKHIGKTIWEGKNENEVGRCKETGKIHVTVNHKYRPTDEVDFLQGDCTKARQKLNWKPRVTFD
ELVREMVDVDELMLRNTNPA
```

## Xenopus laevis:

```
>NP_001085613.1 GDP-mannose 4,6-dehydratase S homeolog [Xenopus laevis]
MAQNQGDCCSPNSNTGKPRKVALITGITGQDGSYLAEFLLLEKGYEVHGIIVRRSSSFNTGRIEHLKYNPQAHIEGNMKLHYGDLTDSTCLVKIINEVKPTEIYNLGAQSHV
KISFDLAEYTADVGLGTLRLLDVAVKTCGLINTVKFYQASTSELYGKVQEIIPQKETTPFYPRSPYGAAKLYAYWIVVNFREAYNLFAVNGILFNHESPRRGANFVTRKISR
SVAKIHFGQMESFSLGNLDAKRDWGHAKDYVEAMWMLQTDDEPEDFVISTGEVHSVREFVEKSFKHIGKTIWEGKNENEVGRCKETGKIHVTVDLKYRPTDEVDFLQGD
SKAKNKLGIWPKVSFDELVKEMVEADIKLMEANTNPA
```

## Salmo salar:

```
>NP_001134845.1 GDP-mannose 4,6 dehydratase [Salmo salar]
MAQCTEPSTSTGANGELKKPRKVAITGITGQDGSYLAEFLLLEKGYEVHGIIVRRSSSFNTGRIEHLKYNPQTHTEGNMKLHYGDLTDSTCLVKIINQVKPTEIYNLGAQSH
VKISFELAEYTANVDGVGTLRLLDVAVKTCGLTNSVKFYQASTSELYGKVQEIIPQKETTPFYPRSPYGAAKLYAYWIVVNFREAYNLFAVNGILFNHESPRRGANFVTRKISR
SVAKIHGLQLESFSLGNLDSKRDWGHAKDYVEAMWMLQEQEPELDVIATGEVHSVREFVEKSFKHVKGKTIWEGKKNENEVGRCKETGKIHVTVDSKYRPTDEVDFLQGD
STKALTGLGWKAKITFEELVKEMVDADIHLMKNNPNA
```

## Petromyzon marinus:

```
>XP_032813332.1 GDP-mannose 4,6 dehydratase [Petromyzon marinus]
MASSSSSP[PEGPGPE]ERGAEGSTAEEGAETGAETGAEGGEERGAEGVGGSSEGGVGGTRGGFVDLEKGAQAVVDASPAERNGERKVALITGITGQDGSYLAEFLL
LEKGYEVHGIIVRRSSSFNTGRIEHLKYNPATHQEGSMKLHYGDLTDSSCLVKIISAVRPSIYNLGAQSHVKISFDLAEYTANVDGVGTLRLLDVAVTCLADRVRFYQAS
TSELYGKVQEIIPQSESTPFYPRSPYGAAKLYAYWIVVNFREAYGMYACNGILFNHESPRRGSNFVTRKISRVAKIHLGQLDCFSLGNLDARRDWGHARDYIEAMWMLQQ
PEPDDFVIATGEVHSVREFVERAFRCVGRSIVWEGSGLQEVGRCQETGEVHVVRVDAKYYRPTDEVDFLQGDCKARAKLGWATRVTFEELVQEMVSADMELMKKNPNA
```

## Branchiostoma belcheri:

```
>XP_019629718.1 PREDICTED: GDP-mannose 4,6 dehydratase-like isoform X1 [Branchiostoma belcheri]
MAEKRPAAEFEDTKEGNGPRRTRKVALITGISGQDGSYLAEFLLIDKGYVVHGIIRRASTFNTGRIEHLKYNPFGHFEGDNFHLHYGDMTDSTCLVKIITEVQPDIEYNLAA
QSHVKVSFDLAEYTADVGVGLRLMDAIRTTGLVSKVKFYQASTSEMYGLQVEVPQKETTPFYPRSPYGAAKLYAYWVVVNYREAYNMFACNGILFNHESPRRGETFVTR
KITRGVAKILLGQQDDIVLGNLDSQRDWGHAKDYIRAMWMLQHQPDPEDFVISTGTVHSVREFVVASFKHIGVDIIEWEGKGLKEVGKDKATGTVVRVRVSQKYRPTDEVDFL
QGDSTKAKKILGWEPSSVSDFMVKEMVDSIDIQLMKSHPLA
```

## Drosophila melanogaster:

```
>NP_608888.2 GDP-mannose 4,6-dehydratase [Drosophila melanogaster]
MLNTRLIAMSTSDGAPETKKQRPSSSSNGSKDQNGTEAGAEGDSRDKVALITGITGQDGSYLAEFLLKKDYEVHGIIRRASTFNTTRIEHLYADPKAHKGGRMKLHYGDMT
DSSSLVKIINMVKPTEIYNLAAQSHVKVSFDLSEYTAEDVAVGTLRLDAIRTCGMEKNVRFYQASTSELYGKVVEPTQNEQTFFYPRSPYACAKMYGFWIVINYREAYNM
YACNGILFNHESPRRGANFVTRKITRSVAKIYHKQMEYFELGNLDSKRDWGHASDYVEAMWMLQRESPSDYVIATGETHSVREFVEAAFKHIDREITWKGKGVDEVGVEN
GTGIVRVIRNPKYFRPTEVDLLQGDASKANRELNWTPKVTFVELSDMMKADIELMRKNPIA
```

### **Hydra vulgaris:**

>XP\_002157707.2 PREDICTED: GDP-mannose 4,6 dehydratase-like [Hydra vulgaris]  
MSSSTNTRKVALITGITGQDGSYLCEYLLEKGYEVHGIIRRSSSFNTGRIQHLYKDKAGHIGGNMHLHYGDLTDSSCLLNIVSQTRPTEIYNLAAQSHVKVSFDLAEYTAD  
ADAMGTLRLLEAVKICNLIGEVRFYQASTSELYGKVHEIPQKETTPFHPRSPYGVAKLYGYWIVTNYREAYGLHASNGILFNHESPRRGETFVTRKITRAVAKIHLGLQDE  
LVLGNIDSVRDWGHAKDYVEAMWMLMQQESADDYVIATNETHTVREFVEKAFSLVNVKIRWEGKGANEVGFDDISNKIRVRISPKYYRPAEVEYLGQDPSKAEKVLGWKRK  
VSFDELVKEMVEADIQLMKTNPEA

### **Nematostella vectensis:**

>XP\_001622549.1 GDP-mannose 4,6 dehydratase [Nematostella vectensis]  
MAEASEDQRKVALITGITGQDGSYLAEFLLNKGQVHGIARRSSSFNTGRIEHLIYENCYTHMGGAMKTHYGDLDSTNLVKIISEVQPTIYNLGAMSHVKVSFELAEYTA  
DVDAVGVLRLDLAICTGLANKVKFYQASTSELYGLVQEVQPTEKTPFYPRSPYGAAKLYGYWIVVNYREAYNMFACNGILFNHESPRRGETFVTRKITRAVAKIHLGLQK  
ELRLGNLDSKRWDGHAKDYVEAMWMLMQQDKPEDFVIATGETHSVREFVEKSFHVGTIIVWQKDEKEIGVDKATNKVLRVDPKYYRPAEVELLLGCAKKAEEKLGWKP  
KIKFEALVKEMVESDLQLMKNNPTA

### **Amphimedon queenslandica:**

>XP\_003384422.1 PREDICTED: GDP-mannose 4,6 dehydratase 2-like [Amphimedon queenslandica]  
MASGNGALPERINRSSDETEKVAMITGITGQDGSYLAELLLLEKGYKVHGIIRRSSSFNTGRIKHLYSNPALHEGGGLLHYGDLTDSSCLVKLVSEIRPTEIYNLAAQSH  
VKLSFDMSEYTADVNGVGTIRLLDAIRTCGLEKKVKFYQASTSELYGKVQEIPTTEKTPFYPRSPYAAKLYGYWVVVNYREAYDMFACNGILFNHESPRRGENFVTRKVT  
RSVAQVHLGHRESFSLGNLGSQRDWDGHAKDYVKAMWMLMQQDKPDDFVIATNKTHSVKKLVELAFKEVGLTISWKGEGLDEVGVDQNDIVRVTVNPKYYRPTVDLQGNP  
AKAKAILGWEPKIEFEDLVKEMVASDIKLLSADPTA

[illegible]

|                                 |                                                                                                                                       |     |
|---------------------------------|---------------------------------------------------------------------------------------------------------------------------------------|-----|
| AAC13553.1[H.sapiens]           | RSVAKIYLGQLECFSLGNLDAKRDWGHAKDYVEAMWLMLQNDEPEDFVIATGEVHSVREF                                                                          | 284 |
| XP_002816391.1[P.abelii]        | RSVAKIYLGQLECFSLGNLDAKRDWGHAKDYVEAMWLMLQNDEPEDFVIATGEVHSVREF                                                                          | 284 |
| NP_666153.1[M.musculus]         | RSVAKIYLGQLECFSLGNLDAKRDWGHAKDYVEAMWLMLQNDEPEDFVIATGEVHSVREF<br>*.***:. . : ***.: ***** **:.***:** * **.*. *.**:                      | 284 |
| XP_003384422.1[A.queenslandica] | VELAFKEVGTLTISWKGEGLDEVGVDDQ-NDIVRVTVNPKYYRPTVEVDFLQGNPAKAKAII LG                                                                     | 341 |
| NP_608888.2[D.melanogaster]     | VEAAFKHIDREITWKGKGVDVEGVNGTGIVRVIRINPKYFRPTEVDLLQGDAQSKANREL N                                                                        | 367 |
| XP_002157707.2[H.vulgaris]      | WEKAFSLNVVKIRWEGKGANEVGFDDISNKIRVRISPCKYYRPAEVEYLQGDPSKAEEKVL G                                                                       | 329 |
| XP_019629718.1[B.belcheri]      | VVASFKHIGVDIIWEGKGLKEVGKDKATGTVRVRVSQKYRRPTVEVDFLQGDSTKAKKI LG                                                                        | 345 |
| XP_001622549.1[N.vectensis]     | VEKSFAHVGTETIVWQGGKDEKEIGVDKATNKVLVRVPDKYYRPAEVELLLGCAKAEKELG                                                                         | 330 |
| XP_032813332.1[P.marinus]       | VERAFRCVGRSIVWEGSGLQEVGRCQETGEVHVVRVDKAYYRPTVEVDFLQGDSCSAKAKLG                                                                        | 412 |
| NP_001134845.1[S.salar]         | VEKSPKHIGKTIVWEGKGDENEVGRCKETGVIHVKVDSKYYRPTVEVDFLQGDCTKAKIKLG                                                                        | 342 |
| NP_001085613.1[X.laevis]        | VEKSFKHIKGTITVWEGKNENEVGRCKETGNIHVKVDLKYYRPTVEVDFLQGDSCSAKKNLG                                                                        | 341 |
| XP_015137673.1[G.gallus]        | VEKSFKHIGKTITVWEGKNENEVGRCKETGKIHVTVNHKYYRPTVEVDFLQGDCTKARQKLN                                                                        | 325 |
| AAC13553.1[H.sapiens]           | VEKSFHLHGKTITVWEGKNENEVGRCKETGKVHVTVIDLKYYRPTVEVDFLQGDCTKAKQKLN                                                                       | 344 |
| XP_002816391.1[P.abelii]        | VEKSFLHIGKTITVWEGKNENEVGRCKETGKVHVTVIDLKYYRPTVEVDFLQGDCTKAKQKLN                                                                       | 344 |
| NP_666153.1[M.musculus]         | VEKSFMIHIGKTITVWEGKNENEVGRCKETGKVHVTVIDLKYYRPTVEVDFLQGDSCSAQQKLN<br>* **.***.***.***.***.***.***.***.***.***.***.***.***.***.***.***. | 344 |
| XP_003384422.1[A.queenslandica] | WEPKIEFDLVKEMVASDIKLLSDAPTA                                                                                                           | 369 |
| NP_608888.2[D.melanogaster]     | WTPKVTFFVELVSDMMKADIELMRKNPI A                                                                                                        | 395 |
| XP_002157707.2[H.vulgaris]      | WKRKVSFDELVKEMEADIQLMKTNP EA                                                                                                          | 357 |
| XP_019629718.1[B.belcheri]      | WEPVSFDEMVKEMVDSIDIQLMKSHPL A                                                                                                         | 373 |
| XP_001622549.1[N.vectensis]     | WKPKIKFEALVKEMVESDILQLMKNNP TA                                                                                                        | 358 |
| XP_032813332.1[P.marinus]       | WATRVTFEELVQEMVSADMELMKKNP NA                                                                                                         | 440 |
| NP_001134845.1[S.salar]         | WAKITIFEELVKEMVDADIHLMKNNP NA                                                                                                         | 370 |
| NP_001085613.1[X.laevis]        | WIPKVSFDELVKEMEADIKLMTNP NA                                                                                                           | 369 |
| XP_015137673.1[G.gallus]        | WKPRVTFDELVREMVDADVELMRSNP NA                                                                                                         | 353 |
| AAC13553.1[H.sapiens]           | WKPRVAFDELVREMVDHADVELMRTNP NA                                                                                                        | 372 |
| XP_002816391.1[P.abelii]        | WKPRVAFDELVREMVDHADVELMRTNP NA                                                                                                        | 372 |
| NP_666153.1[M.musculus]         | WKPRVAFDELVREMVDADVELMRTNP NA<br>* *: * **: * **: * **: * **: *                                                                       | 372 |
