# Supplementary material for: An Evolutionary Perspective on the Origin, Conservation and Binding Partner Acquisition of Tankyrases
Source: MDPI journal article supplement (doi:10.3390/biom12111688), 2022-11-15
Supplement: s1 [file s1]

# PARP12

## Sequences :

>NP\_073587.1 protein mono-ADP-ribosyltransferase PARP12 [Homo sapiens]  
MAQAQGVVGEVTQVLCAGGALELPRLRRRLRMGLSADALERLLRQGRFVAVRAGDAAAAPERVVLAAS  
PLRLCRAHQGSKPGCVGLCAQLHLCRFMVYGACKFLRAGKNCNRNHSLSLTTTEHNLVSLRTHGVDHLSYNEL  
CQLLFQNDPWLLEPICQHYNKGDPHGSCAFQKQCIKLHICQYFLQGECKFGTSCRRSHDFSNSENLEKL  
EKLGMSSDLVSRLLPTIYRNAHDIKNKSSAPSRVPLFVPQGTSEKKDSGSGVSPNTLSQEEGDQICLYHI  
RKSCSFQDKCHRHFHFLPYRWQFLDRGKWEDLDNMLEIEEAYCNPKIERILCSSESASTFHSHCLNFNAMT  
YGATQARRLSTASSVTKPPHFILTTDWIYWMSDEFGSWQEYGRQGTVHPVTTVSSSDVEKAYLAYCTPGS  
DGQAATLKFQAGKHNYELDFKAFVQKNLVYGTTKVCRPRPKYVSPQDVTMTQTCNTKFPGPKSIPTYWDS  
SALPDPGFGKITLSSSEEEYQKVNLFNRTLFFYFVQKIERVQNLALWEVYQWQGMQKQNGGKAVER  
QLFHGTSAIFVDAICQQNFDWRVCGVHGTSYKGKSYFARDAAYSHHYSKSDTQTHMTFLARVLVGEFVRG  
NASFVRPPAKEGWSNAFYDSCVNSVSDPSIFVIFEKHQVYPEYVIQYTTSSKPSVTPSILLALGSLFSSR  
Q

>XP\_024106109.1 poly [ADP-ribose] polymerase 12 [Pongo abelii]  
MAQAQGVVGEVTQVLCAGGALELPRLRRRLRMGLSADALERLLRQGRFVAVRAGDAAAAPERVVLAAS  
PLRLCRAHQGSKPGCVGLCAQLHLCRFMVYGACKFLRAGKNCNRNHSLSLTTTEHNLVSLRTHGVDHLSYNEL  
CQLLFQNDPWLLEPICQHYNKGDPHGSCAFQKQCIKLHICQYFLQGECKFGTSCRRSHDFSNSENLEKL  
EKLGMSSDLVSRLLPTIYRNAHDIKNKSSAPSRVPPFVPQGTSEKKDSGSGVSPNTLSQEEGDQICLYHI  
RKSCSFQDKCHRHFHFLPYRWQFLDRGKWEDLDNMLEIEEAYCNPKIERILCSSESASTFHSHCLNFNAMT  
YGATQARRLSTASSVTKPPHFILTTDWIYWMSDEFGSWQEYGRQGTVAHPVTTVSSSDVEKAYLAYCTPGS  
DGQAATLKFQAGKHNYELDFKAFVQKNLVYGTTKVCRPRPKYMSPODVTMTQTCNTKFPGPKSIPTYWDS  
SALPDPGFGKITLSSSEEEYQKVNLFNRTLFFYFVQKIERVQNLALWEVYQWQGMQKQNGGKAVER  
QLFHGTSTIFVDSICQQNFDWRVCGVHGTSYKGKSYFARDAAYSHHYSKSDTQTHMTFLARVLVGEFVRG  
NASFVRPPAKEGWSNAFYDSCVNSVSDPSIFVIFEKHQVYPEYLIQYSTSSKPSVTPSILLALGSLFSRQ

>NP\_766481.2 protein mono-ADP-ribosyltransferase PARP12 [Mus musculus]  
MAQAQAVAAEVTQLLCAAGGALELAELRRRLRTSLGTDALERLLRDCGRFVVASRAVVAVGAGREAAAAA  
SERLVLAVASSRLCRAHQGPKPGCTGLCAQLHLCKFLIYGNCKFLKTGKNCNRGNHLKTDHNLVSLRTHG  
VDHLITYELCQLLLQNDPSLLPDICLHYNKGDPFGSCSFQKQCIKLHICQYFLQGECKFGTSCRRSHEF  
TNESLSQLERLGLSSDLVSRLLSTYRNAYDIKNKSALSKVSPSPAGPQGSERKDSGSGVSPGTSPQ  
ESEQICILYIRKSCSFQEKCHRHFHFLPYRWQFLDGGKWEDLDNMLEIEEAYSNPKSDRIVYTESAAGFH  
FDNLDFNMKFGNTLARRLSTASSVTKPPHFILTTDWIYWMDDEFGSWQEYGRQSGHVPVTTISSSDVER  
AYLAFCAPGADAQAATLKFQAGKHNYELHFKAFILQKNLVYGTIRKVCRRPKYVSPQDVMQKQSCNTKLHG  
PKSIPDYWDPAALPDLGFKKITLSSSEEEYQKVNINFNRTLFFYFVQKIERIQNMLWEVYQWQCKQMK  
QNGGKEVDERQLFHGTSAINFVDAICQQNFDWRVCGLHGTSYKGKSYFARDAAYSHHYSKSDTHSHMFLA  
RVLVGDVFRGSTSFVRPPAKEGQSNAFYDSCVNSMSDPTIFVVEKHQVYPEYLIQYSTSSKFPASPISIF  
VALGNLFTSRQ

>XP\_416333.5 protein mono-ADP-ribosyltransferase PARP12 isoform X1 [Gallus gallus]  
MRAMRAAQRAQCLPGRQGRMTAIPAEPGALRSSRRGRDRSRAARPFPLARPSRRQFRFRFLAQEAERWR  
RRSRFRARPAGSGSAGGKQPGPAMVLPTQVLRLVCAGGGSLELEELLRLRPRPTAEQLAAVLDRPQRFT  
LVRTPDEAAGGAAAAAAAEETVLVVAVTSSSLRLCLHEHAGCGRGCGRLLHLCYHLKGVCRNQOQARKEC  
KFVHDFYSPHNHVSLRQGLDSTFSNDELRLQLLLQNDPTLLPEVCLHYNKGDPYGSCFTFKMCTKLHVC  
QYFLRGCRFGSSCKRSHDFSCKPECCKELRQGMSSDIQKLPISYRNMYAIQNSKSGKHDTEDNKSLPC  
KERKHSSSQESTSTSNVEVQICLYNLYTSCIFEDKCIETHFLPYRWQISDGTWTKDLESMEIEKEEYCD  
PNNIRSSKPISESGFIFPYISFVMDQSGFKVRRLSTASSVTKPPHFILTTTEWIYWKDEHGVWREYKKG  
DSRAAATVSSDDLEKAYTVGNSAKLNFKAGVHEYELDFGAMTQKNLRYKTERKVCRRPKFVQSSEVERI  
RKRGFKNTEELRIIPSHWDKSALPEGLFKLIELDSSSEYNNKVKGDQRTMPKTHIKRICIQNPISLWEL  
YQWQKEQMGKSNGGKTDERFLFHGTSSKKHIDAICHQNFDWIRICGLNGTVYKGKSYFARDAASYDAYCREG  
SCSKTMFQARVLVGEFTVGRSSVVRPPLKDNQNFYDSCVNSSSNPSIFVIFEKQVYPEYLIIEYLDQACA  
RML

>XP\_018096331.1 protein mono-ADP-ribosyltransferase PARP12 [Xenopus laevis]  
MWTNQLIMVHTARLSRRLCAGGSMELQQLGHSGLGNQQLERLVEVEGSLVLRVQEGDQKVAVYSD  
LRLCQTFPKCAGCQQLHLCRYFLGSCNRSPCKFNHICIRNGHNLVSLQKFLDSMPIDELRQLLLQNDP  
LLPDICSHYNRGDPHGSCCTYNNKNLHVCQHFLQGDCKGKEKCKRCHDLSSEETLKLKTKWQLSDSLL  
PGLLETYYNAHTLKKSCDRPPRNVYKSAEKKTKPGPSKSGTSQEIEEICLYFIIRNSCSFKKECKVREHFL  
PYRWQYVNTGQTKDLDNMEMIEKSYCDPNSRAVLNLDFAEMYQSNKVKRLSTPSSASKPPHFVFTTDW  
KWWYMDENKWWVEYGTESDRHANSTICSSDLENFYQSNQTAADVFKPAGKHXYLSLSPKMMVQRNLQVETKR  
RVCRPRFVYSGKDVKKKRSSTSEPSKEDKNTPEHWDKQTPDLGYKLVLLSPLSEEYSKIEMAFRCRTLRT  
IRTHSERTIQNLALWEVYQWQEKQMKLNEGKDPERQLFHGTQVKLIDAICQQNFDWIRICGVHGTAYGK  
GSYFARDSYSHNYCKRSSSQANIMFVARVLVGNFTRGHSSYLRRPSPKSEFRSTSFYDSCVDSKSNPSIF  
VIFEKHQIYPEYLIKYSK

>XP\_014003371.1 protein mono-ADP-ribosyltransferase PARP12 [Salmo salar]  
MSSIYSYQYVTIKLCGNQGCLDFKRLDQIVGQKFTVADDVLLGILCDREKYAISKGEGKASRLAMSQNSVI  
VAKTSLRVQSPGECLEHCENLHLCRYFVCGNCRFGNCKNAHSLDSPHNTAVIRLSLGHLDGEAELFPL  
LLQNDPILMPEICSHYNGVGEHGSKFKTSCTSLHLCLHFLQGDCKFGAGCKRAHTDATMTKILNLRG  
FSQENIRILDKIYNKFIIGQGHEEKPSVVVPSASAIEPVGKERSRKPSSRSISETDRNEICLFFIRR  
HCSFKEKCVRIHYHLPYKWQILERDGVTWRLDPNVEEIEKAYCIPGKDTSGGIQPVNFLTMTCGRSPVRR  
LSTVSSVTKPPHFILTTEWLMYWSGELGQWIEYQYETIDGKERVASVTSKLTENVYQADPDSEIPFGSGH  
NQYILRFKEMIQQNVRFKTKREVARRPCFLSGQDVEAKLKSQSPSTSSSTSVSPHWDKGAALPDFTYKL  
VPLLDQMTHEYQWQSLFKTKMSTSTHKNIRIQNPISLWVRVTFQWQKEQMKVKNGKLVDERHLFHGTPESI  
VDAICEQNFDWRVCGIHGSHYKGKSYFARDALYNRPFKSSSVSGKKIMFVALVLVGEFTKGNRDIYLRPPQ  
KGTKRLLYDSCVDSSENPALFVVFKEQQIYPEFVIEYS

>XP\_032833032.1 protein mono-ADP-ribosyltransferase PARP12 [Petromyzon marinus]  
MQSSTYPQEQQQQEKPLPLDRALDTHLSDGALPLSALASALGFFDSALLAALRSKPELFALVEGSGSS  
SSSLSGGQQQPERGSLDMRVLAVSALRVCPRYRERTGCPDGEGCAKLHVCRRFVLGSKCFGPDCKFSHD  
FRDGNHRLCYKSGVEALPFDPMQTLQLLQNDPTLLPQICKTYKVLDAAGECKYGNKCARLHLCRPFVLGV  
CKFGDKCRNHGLSDAGLRLLKHQGVCAWPDAAALLGLLRREQIHAAAGGADAADDGATIAPLGFAAR  
AAARGKAGSGSGDGPAGAGRDGEGEICLYHLLSKCHYKDRCLKSHAALPYRWQERSHGGGAWQDLP  
TEAMERHYCDPASVSHDSVDFIHMKSVMGTVRRLSTANAVAMPDNFLTTRWSWYQECVGTWIKYGDEA  
TTNDRAKSNVSSDLEKAYHEDKEGSFKTAGRFYSRLDFKDMQTNLNEVGTTRCVRRRRPLLVTARDVEV  
ARERHASLRTGVGVSVAHWDRASLSDVDISLVELVNTTSEYKEVATLFKNTLSQPSINILNVKRVQNL  
LWDAFQRKREWMRKNDGVEVEERKLPHGTRPKHVVPICQQNIDWRLRGAHGTAYGEGSYFARDAASYST  
YSKGRKGTAPASAAAMFLARVLVGRYTCGKAGYVRPAIKASPSTSAQGAPEVYFVYDSCVNTIEDPSIFV  
FERDQIYPEYVIEYQF

>XP\_019640190.1 PREDICTED: poly [ADP-ribose] polymerase 12-like [Branchiostoma belcheri]  
MKFATNQDQSGSPNGGAGAFSCSPRGRGNGRGRGRGGRFGKPSPSDPAGRGGRGGAGRGRGMDRGRG  
RGFGYSPQVPPASGPMVANEAKFSMNDVMQLMQAMHGAAPMPQQAQPEAAMVHPQAAPPSPSGARS  
RSRQRTAHDNNDPPVPAKLQACQTYWYNNRQRCQTKGDACTFLHVCGRVLYGGCICFDKQGCQESHNILTQ  
NKLQKFGIPCNSEKAVIDIFKRDVFNKRKAEQGDVKPEKLDEICFNIRQRCSYKTLCERMWCRMPYQ  
WQYRAPAADRWRFHGLDNNVWEAYCKVTEDSYSPVRLDGKTCVAVNTDMKAVATDGSIGDTRQEFV  
RLGTSSSVKSAAPHGLFVTEWLYWHVDVGTWVEYQGMNKSGEVKGTSLSLTSRDIEDRYQDQRDADVFTST  
SHQVYVLRLLDMCQENTRVGTRDRVRKPKFVSEEDVKNPKPKPASRAKSARSASAWDESAPAHWS  
DDEDFVKVDVGTSAEYRNKTLFEQGGMAGTAIAGVKRVQNAFLWASAYNRKKAQLKQNGKQDAEERLL  
FHGTQDAVDAICQQNFDWRLSGSRVGLYGGQTYFSASAQYSHSYAQASNGRRYMFVVRVLVGYATQG  
DAGIRRRPVPNPGEPYGRMYDSCVNDTANPNIFVIFDNAAQCYPEHIEY

## Alignment

|                            |                                                               |     |
|----------------------------|---------------------------------------------------------------|-----|
| XP_019640190.1[B.belcheri] | MKPATNGQDGSPNGGGARG--AFSCSPRGRGGNRGRGRGRGRGSPSPDPDA-----      | 51  |
| XP_032833032.1[P.marinus]  | -----                                                         | 0   |
| XP_014003371.1[S.salar]    | -----                                                         | 0   |
| XP_018096331.1[X.laevis]   | -----                                                         | 0   |
| XP_416333.5[G.gallus]      | MRAMRAAQRAQCPLGRQRGMTAIPAEPGALRSSRGRDRSRAARPFPLARPSRRQFFR     | 60  |
| NP_766481.2[M.musculus]    | -----                                                         | 0   |
| NP_073587.1[H.sapiens]     | -----                                                         | 0   |
| XP_024106109.1[P.abelii]   | -----                                                         | 0   |
| XP_019640190.1[B.belcheri] | -----GRGGRGGARGGR-----GMDRGRGRGGFYSPQQV----                   | 80  |
| XP_032833032.1[P.marinus]  | -----MQS---SYPEGQQQKEKPFPLDRLALDLDHSGCALPLSALASAL             | 43  |
| XP_014003371.1[S.salar]    | -----MSSIVSQVYTKILCGNQCLDFKRLDQIV                             | 29  |
| XP_018096331.1[X.laevis]   | -----TNQLIMVHTARLSRRLCSAGGSMEQLGHS                            | 34  |
| XP_416333.5[G.gallus]      | FLAQEAERWRRSRFRFRPAGSGSAGGKPGPAMVLPQTQVLRVLCAGGSGLELELLRRL    | 120 |
| NP_766481.2[M.musculus]    | -----MAQAAVAIAEVTQLLCAAGGALELAELRRL                           | 31  |
| NP_073587.1[H.sapiens]     | -----MA-QAGVVGEVTQVLCAGGALELPRLRRL                            | 30  |
| XP_024106109.1[P.abelii]   | -----MA-QAGVVGEVTQVLCAGGALELPRLRRL                            | 30  |
| XP_019640190.1[B.belcheri] | -----PPPA-SGPMVANEAKFSM-----NDVM-----                         | 101 |
| XP_032833032.1[P.marinus]  | GF----PDSALLAALRSKPELFALVEGSGSSSSSLSGGQQ-QQPERGSLDWRVLAVSALR  | 98  |
| XP_014003371.1[S.salar]    | GQKFTVADDVLLG-ILCDREKYAI-----S---KGECKASRLAMSQNSVIVAKTSLR     | 77  |
| XP_018096331.1[X.laevis]   | G-LN--GQQLER-LVEVEGRSL-----VLRVQEGDQKVAVVRSDLR                | 72  |
| XP_416333.5[G.gallus]      | FCRPT--AEQLAA-VLRDQRFPLVTPDEAEA---GGAATAAAAEETVLVIVATSSLR     | 174 |
| NP_766481.2[M.musculus]    | RTSLG--TDALER-LLRDGGRFVVASRAVAVG---AGREA---AAAASERVLVAVSSLR   | 82  |
| NP_073587.1[H.sapiens]     | RMGLS--ADALER-LLRQGRFVVAVRAG-----G---AAAAPERVVLAVSPLR         | 73  |
| XP_024106109.1[P.abelii]   | RMGLS--ADALER-LLRQGRFVVAVRAG-----D---AAAAPERVVLAVSPLR         | 73  |
| XP_019640190.1[B.belcheri] | -----QLMQAMHMGAAPOMPQAQPEAAVMHPQAPPFS-----G                   | 134 |
| XP_032833032.1[P.marinus]  | VCPRYRE-RTGCPDGECAKLVCRRFVLSGCK-F---GPDCFKSHDFRGNHRLCYKS      | 153 |
| XP_014003371.1[S.salar]    | VQSP---PGE---CLHCENLHLCRYFVCGNCR-F---GNCKRNAHLSDPHNTAVIRSL    | 127 |
| XP_018096331.1[X.laevis]   | LCQT---PKC---AGDCGQLHLCRFYILGSCN-----RSPCKFNHCIRNGHNSVLQKF    | 120 |
| XP_416333.5[G.gallus]      | LCLHG---AGC---RGGCGRHLCKYHLKGVCVR-NQARKECKFVHDFFYSPHNSVLRLQ   | 228 |
| NP_766481.2[M.musculus]    | LCRAHQGKPGC---TGLCAQLHLCKFLIYGNCR-FLTKGNCRNGHNLKTDHNLVLRTH    | 139 |
| NP_073587.1[H.sapiens]     | LCRAHQGKPGC---VGLCAQLHLCRFMYVGACK-FLRAGKNCRNSHSLTEHNLVLRTH    | 130 |
| XP_024106109.1[P.abelii]   | LCRAHQGKPGC---VGLCAQLHLCRFMYVGACK-FLRAGKNCRNSHSLTEHNLVLRTH    | 130 |
| XP_019640190.1[B.belcheri] | GARS-RFRSRQRTAHNNDNPPVPAKLPQACTWYNNRQ---RGCTKGDACTFLHVCGRYLV  | 190 |
| XP_032833032.1[P.marinus]  | GVEA-LFFDPMQTL---LLQNDPTLLPQICKTYKVLV--AAGECKYGNKCARLHLGRFVL  | 208 |
| XP_014003371.1[S.salar]    | GHHG-LGEAEFLPL---LLQNDPYLMEITCSHYNKGCGEHSCKFKTSCITSLHLHLFQ    | 183 |
| XP_018096331.1[X.laevis]   | HLDS-MPIDELRQL---LLQNDPNLLPDICSHYNRGDCPHGSCITYNKNKMLHVCOHFLQ  | 176 |
| XP_416333.5[G.gallus]      | GLDSTFSNDELRLQL---LLQNDPTLLPEVCLHYNKGDPYGSCTFKMKCTKLHVCOYFLR  | 285 |
| NP_766481.2[M.musculus]    | GVDH-LTYTELQQL---LLQNDPSLLPDICLHYNKGDPFGSCSFQKQCIKLHIQOYFLQ   | 195 |
| NP_073587.1[H.sapiens]     | GVDH-LSYNELCQL---LFQNDPWLLPEICQHYNKGDPHGSCAFQKQCIKLHIQOYFLQ   | 186 |
| XP_024106109.1[P.abelii]   | GVDH-LSYNELCQL---LFQNDPWLLPEICQHYNKGDPHGSCAFQKQCIKLHIQOYFLQ   | 186 |
| XP_019640190.1[B.belcheri] | GGCIFDKGQCEFSHNILTQQNGKILQKFGIPCNSEKAVIDIFKRDFVNKRKAEQ-----   | 244 |
| XP_032833032.1[P.marinus]  | GVCKFGD-KCRRNHGLSDAGLRRLKQHGVCAWPDAAALLGLLRREQIHAAAGGGADAAD   | 267 |
| XP_014003371.1[S.salar]    | GDCKPGA-GCKRAHTFDAT-TMKILNNGRGFSQENIRILDKIYNNKFIIIGQGEHEKPSVV | 241 |
| XP_018096331.1[X.laevis]   | GDCKPGE-KCKRCHDLSEETLKKLTKWQLSDSLPLGLLETYTNAHTLKSSCDR--PPRN   | 233 |
| XP_416333.5[G.gallus]      | QCCRFPS-SCKRSHDFSPKECEKLERQGMSSDIQKLPSTYRNMVATQNSKGS--KHDT    | 342 |
| NP_766481.2[M.musculus]    | GECKFGT-SCKRSHEFTNSESLEQLERLGLSSDLVSRLLSTYRNAYDIKNKGA--LSKV   | 252 |
| NP_073587.1[H.sapiens]     | GECKFGT-SCKRSHDFSNSENLEKLEKLGMSDLVSRLLPTIYRNAHDIKNKSSA--PSRV  | 243 |
| XP_024106109.1[P.abelii]   | GECKFGT-SCKRSHDFSNSENLEKLEKLGMSDLVSRLLPTIYRNAHDIKNKSSA--PSRV  | 243 |
| XP_019640190.1[B.belcheri] | -----GDKVPEKLDEICFINIRQRCSEYTKLCERW                           | 273 |
| XP_032833032.1[P.marinus]  | DGATIALPGFAARAAARGRKAGSGGDGMPAGAAGRDGEGEICLYHLLSKCHYKDRCLKS   | 327 |
| XP_014003371.1[S.salar]    | VPSPASALIEPVGKERSRK-----PSSRSISETORNEICLFFIRRHCSFPEKCVRI      | 291 |
| XP_018096331.1[X.laevis]   | V----V---KSAEKKTTPGP-----S-KSGTSGQEIEICLYFIRNSCSFPEKCVRE      | 276 |
| XP_416333.5[G.gallus]      | EDNKLSPC--KERKHSS-----QESTSTNSEVEQICLYNLYTSCIFEDKCIRT         | 389 |
| NP_766481.2[M.musculus]    | SPSPAGQPGSGSERKDDSSGP-----VSPGTSPQSESEQICLYHIRKSCSFQEKCHRV    | 303 |
| NP_073587.1[H.sapiens]     | PP-LFVPQGTSEKDDSSGS-----VSPNTLSQEEGDQICLYHIRKSCSFQDKCHRV      | 293 |
| XP_024106109.1[P.abelii]   | PP-PFVPQGTSEKDDSSGS-----VSPNTLSQESDQICLYHIRKSCSFQDKCHRV       | 293 |
| XP_019640190.1[B.belcheri] | HCRMPYQWYRAPAADRWRFHGDLDNMVEEAYCKVTEDSYSPVRL--DGKTCVAVNFTDM   | 331 |
| XP_032833032.1[P.marinus]  | HAALPYRWQERSHGGGAQWDLPG--TEAMERHYCDPASVS-----HDSVDFIHM        | 374 |
| XP_014003371.1[S.salar]    | HYHLPYRWQILERDGVTRDLPN--VEEIEKAYCIPGKDTSGG-----IQPVNFLT       | 341 |
| XP_018096331.1[X.laevis]   | HFHLPYRWQVY--TNGTWKDLN--MEMIEKSYCDPNSRAV-----LVNLDFEAM        | 322 |
| XP_416333.5[G.gallus]      | HFHLPYRWQIS--DGTTWKDLN--MEEIEKEYCDPNNIRSSKPISESGFIPFYISFVDM   | 445 |
| NP_766481.2[M.musculus]    | HFHLPYRWQFL--DGGKWKDLN--MELIEEAYSNPKDRIVYTESAAGPHFDNLFNSM     | 359 |
| NP_073587.1[H.sapiens]     | HFHLPYRWQFL--DRGKWEDLN--MELIEEAYNPKIERILCESASFTFHSCLNFNAM     | 349 |
| XP_024106109.1[P.abelii]   | HFHLPYRWQFL--DRGKWEDLN--MELIEEAYNPKIERILCESASFTFHSCLNFNAM     | 349 |
| XP_019640190.1[B.belcheri] | KAVATDGSIGDTRQEFVRLSTSSSVKSPAGHLVFTWMLWYHWDVGTWVEYQGMNKS      | 391 |
| XP_032833032.1[P.marinus]  | KSV-----HGTVRLSTANAVAMPDNFLTTRMSWYQECVGTWIKYGEAATTN           | 423 |
| XP_014003371.1[S.salar]    | TCG-----RSPVRLSTVSSVTKPPHFLTTEWMLWYSGELGQWIEYQGETYDG          | 390 |
| XP_018096331.1[X.laevis]   | TYQ-----SNKVRLSTPSSASKPPHFVFTTDMKWYMWDEYNKWVEYGTESDR-         | 370 |
| XP_416333.5[G.gallus]      | QSG-----FKVRLSTASSVTKPPHFLTTEWMLWYWKDEHGVWREYGGKDS-           | 493 |
| NP_766481.2[M.musculus]    | KFG-----NTLARRLSTASSVTKPPHFLTTEWMLWYMWDEFGSWQYGRQGS-          | 407 |
| NP_073587.1[H.sapiens]     | TYG-----ATQARRLSTASSVTKPPHFLTTEWMLWYMWDEFGSWQYGRQGTV-         | 397 |
| XP_024106109.1[P.abelii]   | TYG-----ATQARRLSTASSVTKPPHFLTTEWMLWYMWDEFGSWQYGRQGT-          | 397 |
| XP_019640190.1[B.belcheri] | EVRGTSLSLRSRDIEDRYQD-----QRDADVTFSTSHHQVYLRRLDMQENTRVGTRRD    | 444 |
| XP_032833032.1[P.marinus]  | D-RAKSNVSSLDLEKAYHE-----DKEGSFKTAGRFSYRLDFKMDTQTNLEVGTRRC     | 475 |
| XP_014003371.1[S.salar]    | K-EKVASVTSKLTENYQA-----DPDSEIPFGSGHNNQYILRFKEMYQQNVRFKTKRE    | 442 |
| XP_018096331.1[X.laevis]   | ---HANSTICSSDLENFYQS-----NQTAADVFKFAGKHKYSLSPKNNVQRNLQYETKRR  | 421 |
| XP_416333.5[G.gallus]      | ---RAAATVSSDLEKAYTV-----GNSAKLNFKAGVHVELDFGAMTQKNRLVYETKRR    | 544 |
| NP_766481.2[M.musculus]    | --HPVTISSSDVEKAYLAFCAQADQAATLKFQAGKHNVELDFKAFQKNLIVYETKRR     | 465 |
| NP_073587.1[H.sapiens]     | --HPVTISSSDVEKAYLAYCTPGSDQAATLKFQAGKHNVELDFKAFVQKNLIVYETTKK   | 455 |
| XP_024106109.1[P.abelii]   | --HPVTISSSDVEKAYLAYCTPGSDQAATLKFQAGKHNVELDFKAFVQKNLIVYETTKK   | 455 |
| XP_019640190.1[B.belcheri] | VRRRPKFVSEEDVKNPPKPPASRAKSARSASAWDESAPAHWSPMSD--DDEFVKVDVVG   | 503 |
| XP_032833032.1[P.marinus]  | VRRRPPLLVTARDVEVARERHAS-----LSRTGVGVSFAHWDRASLSDVDISLVELVNT   | 528 |
| XP_014003371.1[S.salar]    | VRRRPCLSGQDVEAKLKGSGP-----ESTSSSTVSVPHPHWDKALPDTYKLVPLLDQ     | 496 |
| XP_018096331.1[X.laevis]   | VRRRPVFSVGDKVKKRSTSE-----P--SKEDKNTPEHWDKQTPDLGYKLVLVLSPL     | 473 |
| XP_416333.5[G.gallus]      | VRRPKFVSPQSEVERIRKRGFK-----N--TEELRRIPSHWDKALPDELFGKLTLDSS    | 596 |
| NP_766481.2[M.musculus]    | VRRPKFVSPQDVMQKSCNT-----K--LHGPKSIDPYWDPAALPDLGFKKITLSSS      | 516 |
| NP_073587.1[H.sapiens]     | VRRPKFVSPQDVTMTQTCNT-----K--FPGPKSIDPYWDSSALPDGFGKITLSSS      | 506 |
| XP_024106109.1[P.abelii]   | VRRPKFVSPQDVTMTQTCNT-----K--FPGPKSIDPYWDSSALPDGFGKITLSSS      | 506 |
| XP_019640190.1[B.belcheri] | SAEYRNKVLTFEQGGM-AGTAIAGVKRVQNAFLMSAYNRKKAQLKKQNGKDAERLLFH    | 562 |

|                            |                                                               |     |
|----------------------------|---------------------------------------------------------------|-----|
| XP_032833032.1[P.marinus]  | TSEYKEVATLKFNTLSQPSINILNVKRVQNLWDAPQKREWMRKNKGVEVEERKLFH      | 588 |
| XP_014003371.1[S.salar]    | MTEYQMVSLSFKRTMT--STIHKINRIQNPSLWRFQWQKEQMKVKNGKLVDERHLFH     | 554 |
| XP_018096331.1[X.laavis]   | SEESKIEAMFCRTLRT--IRIHSIERIQNLALWEVYQWQKEQMKKLNKGKDPEERQLFH   | 531 |
| XP_416333.5[G.gallus]      | SEYKNKVGDFQRTMPK--THIKRICRIQNPSLWELVQWQKEQMKQKNGGK-TDERFLFH   | 653 |
| NP_766481.2[M.musculus]    | SEYQKVNINIFNRTLPP--YFVQKIERIQNMGLWEVYQWQKQKQNGGKEVDERQLFH     | 574 |
| NP_073587.1[H.sapiens]     | SEYQKVNINIFNRTLPP--YFVQKIERVQNLALWEVYQWQKQKQNGGKAVDERQLFH     | 564 |
| XP_024106109.1[P.abellii]  | SEYQKVNINIFNRTLPP--YFVQKIERVQNLALWEVYQWQKQKQNGGKAVDERQLFH     | 564 |
|                            | ** : * . : : *:* ** : : : : * * :** **                        |     |
| XP_019640190.1[B.belcheri] | GTQDAVVDAICQNFDMRLSGSRVGQLYGQGTYSASAQYSHSYAQQA--SNGRRYMFV     | 619 |
| XP_032833032.1[P.marinus]  | GTRPKHVVPICQNIQNDWRLRGA-HGTAYGEGSYFARDASYSHYSKGRGTAPASAAFL    | 647 |
| XP_014003371.1[S.salar]    | GTEPSIVDAICEQNFDMRVCGI-HGSHYKGGSYFARDALYSNRFSSKSS--VSGKKIMFV  | 610 |
| XP_018096331.1[X.laavis]   | GTRVKKHIDAICQNFDMRVICGV-HGTVYKGGSYFARDASSYSHNYCKRS--SSQANIMFV | 587 |
| XP_416333.5[G.gallus]      | GTSKKHIDAICHQNFDMRVICGL-HGTVYKGGSYFARDASYSDAYCREG--SCSKTMMFQ  | 708 |
| NP_766481.2[M.musculus]    | GTSANFVDAICQNFDMRVICGL-HGTSYKGGSYFARDAAYSHHYSKSD---THSHMMFL   | 629 |
| NP_073587.1[H.sapiens]     | GTSANFVDAICQNFDMRVICGV-HGTSYKGGSYFARDAAYSHHYSKSD---TQTHTMFL   | 619 |
| XP_024106109.1[P.abellii]  | GTSTIFVDSICQNFDMRVICGV-HGTSYKGGSYFARDAAYSHHYSKSD---TQTHTMFL   | 619 |
|                            | ** : **.*:*:* * * **.*:*:* : : ** . : : **                    |     |
| XP_019640190.1[B.belcheri] | VRVLVGAYTQGDAGIRPPPPVNP-----EPYGRMYDSCVNDTANPNIFVIFDNAQCY     | 672 |
| XP_032833032.1[P.marinus]  | ARVLVGRYTCGKAGYVRPPPAIKASPSTAGQPAPEVYDSCVNTIEDPSIFVVFERDQIY   | 707 |
| XP_014003371.1[S.salar]    | ALVLVGEFTKGNRDYLRPPPKGKTK-----KRLYDSCVDSSENPALFVVFQKQIY       | 660 |
| XP_018096331.1[X.laavis]   | ARVLVGNFTKRGHSSYLRRPPSKSEF-----RSTSFYDSCVDSSENPALFVVFQKQIY    | 639 |
| XP_416333.5[G.gallus]      | ARVLVGEFTVGRSSYVRPPLKDN-----QNFYDSCVNSSENPALFVVFQKQVY         | 757 |
| NP_766481.2[M.musculus]    | ARVLVGDFVGRGTSFVRPPAKEGQ-----SNAFYDSCVNSMDSPTIFVVFQKQVY       | 680 |
| NP_073587.1[H.sapiens]     | ARVLVGEFVRGNASFVRPPAKEGW-----SNAFYDSCVNSVSDPSIFVVFQKQVY       | 670 |
| XP_024106109.1[P.abellii]  | ARVLVGEFVRGNASFVRPPAKEGW-----SNAFYDSCVNSVSDPSIFVVFQKQVY       | 670 |
|                            | . **** :. * . *** :***** :* ***:*. * *                        |     |
| XP_019640190.1[B.belcheri] | PEHIIY-----                                                   | 679 |
| XP_032833032.1[P.marinus]  | PEYVIEYQF-----                                                | 716 |
| XP_014003371.1[S.salar]    | PEFVIEYS-----                                                 | 668 |
| XP_018096331.1[X.laavis]   | PEYLIKYSK-----                                                | 649 |
| XP_416333.5[G.gallus]      | PEYLIYLDQACARML-----                                          | 773 |
| NP_766481.2[M.musculus]    | PEYLIQYSTSSKPPASPSIFVALGNLFTSRQ                               | 711 |
| NP_073587.1[H.sapiens]     | PEYVIQYTTSSKPSVTPSILLALGSLFSSRQ                               | 701 |
| XP_024106109.1[P.abellii]  | PEYLIQYSTSSKPSVTPSILLALGSLFSSRQ                               | 700 |
|                            | **.:*:*                                                       |     |

# Percent identity matrix:

```
#
#
# Percent Identity Matrix - created by Clustal2.1
#
#
1: XP_019640190.1[B.belcheri] 100.00 33.28 34.61 33.98 32.97 31.43 33.04 32.87
2: XP_032833032.1[P.marinus] 33.28 100.00 37.08 39.00 38.62 38.58 39.63 39.63
3: XP_014003371.1[S.salar] 34.61 37.08 100.00 45.92 45.40 45.64 46.13 46.13
4: XP_018096331.1[X.laevis] 33.98 39.00 45.92 100.00 50.94 51.88 51.49 51.64
5: XP_416333.5[G.gallus] 32.97 38.62 45.40 50.94 100.00 54.20 54.41 54.41
6: NP_766481.2[M.musculus] 31.43 38.58 45.64 51.88 54.20 100.00 81.03 81.43
7: NP_073587.1[H.sapiens] 33.04 39.63 46.13 51.49 54.41 81.03 100.00 97.71
8: XP_024106109.1[P.abelii] 32.87 39.63 46.13 51.64 54.41 81.43 97.71 100.00
```
