# Supplementary material for: An Evolutionary Perspective on the Origin, Conservation and Binding Partner Acquisition of Tankyrases
Source: MDPI journal article supplement (doi:10.3390/biom12111688), 2022-11-15
Supplement: s1 [file s1]

# PARP3

## Sequences :

>NP\_001003931.4 protein mono-ADP-ribosyltransferase PARP3 isoform a [Homo sapiens]  
MAFKPKFWQTEGPEKKKGQAGREEDPFRSTAEALKAIPA EKRIIRVDPTCPLSSNPGTVVYEDYNCTL  
NQTNIEINNKKFYIIQLLQDSNRFFTWNWRGVRGVEVGQSKINHTRLEDAKKDFEKKFREKTKNNWAER  
DHVFSHPGKYTLIEVQAEDEAQEAVVKVDRGPVRTVTKRVQPCSLDPATQKLTINIFSKEMFKNTMALMD  
LDVKMPLGKLSKQIARGFEALEALEALKGPTDGGQSLLELSSHFYTVIPHNFGHSQPPPINSPELLQ  
AKKMDMLVLADIELAQAALQAVSEQEKTVVEVPHPLDRDYQLLKCQLQLLDSGAPEYKVIQTYLEQTGSNNH  
RCPTLQHIWKVNQEGEEDRFQAHSKLGNRKLWWHGTNMAVVAAILTSGLRIMPHSGGRVKGKIYFASENS  
KSAGYVIGMKCAHHVGYMFLGEVALGREHHINTDNPSLKSPPPGFDSVIARGHTEPDPTQDTELELDGQ  
QVVVPQGPVPCPEFSSSTFSQSEYLIYQESQCRLRYLLEVHL

>XP\_002813722.3 poly [ADP-ribose] polymerase 3 isoform X1 [Pongo abelii]  
MSLLFLAMAPKKRPSVQTEGPEKKKGQAGREEDPFRSAAEALKAIPA EKRIIRVDPTCPLSSNPGTVVYE  
DYDCTLNQTNIGNNNKKFYIIQLLQDSDRFTCNWRGVRGVEVGQSKINHTRLEDAKKDFEKKFREKTKN  
NWAERDRFVSHPGKYTLIEVQAEDEAQEAVVKVGGPVRTVAKRVQPCSLDPATQKLTINIFSKEMFKNT  
MALMDLDVKMPLGKLSKQIARGFEALEALEALKGPTDGGQSLLELSSHFYTVIPHNFGRSQPPPINS  
PELLQAKKMDMLVLADIELAQAALQAASEQEKMVVEVPHPLDRDYQLLKCQLQLLDSGAPEYKVIQTYLEQ  
TGSNHRCPRTLQHIWKVNREGEEDRFQAHSKLGNRKLWWHGTNMAVVAAILTSGLRIMPHSGGRVKGKIYF  
ASENSKSAGYVTGMKCAHHVGYMFLGEVALGREHHINTDNPSLKSPPPGFDSVIARGHTEPDPTQDTELE  
ELDGGQVVVPQGPVPCPEFSSSTFSQSEYLIYQESQCRLRYLLEVHL

>EDL21147.1 poly (ADP-ribose) polymerase family, member 3, isoform CRA\_a [Mus musculus]  
MAPKKRASVQTGEGSKKQGTTEEDSFRSTAEALRAAPADNRVIRVDPSCPFSRNPQIQVHEDYDCTLNQ  
TNIGNNNKKFYIIQLLEEGSRFFCWNWRGVRGVEVGQSKMNHFTCLEDAKKDFEKKFREKTKNKNWEERDRF  
VAQPNKYTLIEVQGEAESQEAIVKVYSGPVRTVVKPCSLDPATQNLITNIFSKEMFKNAMTLMNLDVKRM  
PLGKLTQOIARGFEALEALEAMKNPTDGGQSLLELSSCFYTVIPHNFGSRSPPPINSFDVLQAKKMDML  
VLADIELAQTLLQAAPEEEEEKVVEVPHPLDRDYQLLRCQLQLLDSGESEYKAIQTYLKQTGNSYRCPNL  
RHWKVNREGEEDRFQAHSKLGNRKLWWHGTNMAVVAAILTSGLRIMPHSGGRVKGKIYFASENSKSAGY  
VTMTMCGGHQVGYMFLGEVALGKEHHITDDPSLKSPPPGFDSVIARGQTEPDPAQDIELELDGQPVVVV  
QGPVPQCPSPFKSSSFSQSEYLIYKESQCRLRYLLEIHL

>XP\_040537823.1 protein mono-ADP-ribosyltransferase PARP3 [Gallus gallus]  
MAPKRRAPASQPADGGKKAKGGEEEEDAWSSALTALTAPREKPPATIDGQCPLSAGDPADKYVEDYDC  
TLNQTNISANNKKFYIIQLIEHGGTYSTWNWRGVRGVEVGQSKLLPFTSLAAAKDFEKKFREKTKNRMWA  
RDMFVAPQKGKTYTLIEVQPGAGQEAVALVDGAGDEKVSRRVLPALDETTQKLVALIFSSDMFRHAMQAM  
NLDVKRMPLGKLSKQIARGFEALEALEALGEGQPSMSRLEELSSRFYTVIPHNFGRARPPPIDSPPELL  
RAKKMDMLVLADIEVAQSQAQKVEEEVVAHPLDRDYALLCCQLTLLEDTSQBEVEMILNVAQTGGQVY  
VLNWRVAEGEDLFGADHLEHRRLLWHGTNMAVVAAILKNGLRIMPHSGGRVKGKIYFASENSKSAC  
YVGCTSKRVGLMFLTEVALGKPYCITRDEPTLQQPPNGYDSVQACGRTEPDPAQDVEVTLDDKKVLVCQG  
KPIMPAYKSSFFQSEYLIYQESQCRIRYLVQLHF

>XP\_018121381.1 poly (ADP-ribose) polymerase family member 3 L homeolog isoform X1 [Xenopus laevis]  
MAPKRRAAATKAKASGKIKTKVKEEVKEEEIEQPVKATDRFQSAVQALKAASGKKGKAKVDSCCHLSCGG  
DYEVYEDYDCLMNQTNIGSNNNKFYVILITSKKESYCNWRGVRGVELGQSKLSFPFNLAGAQKDFEKKF  
KDKTKNSWSERENFTAHPGKYTMIIEVQHNDDDDDGSGEATVYKADTVGTVQKVPCSLDKPTQDLMSLI  
FSSDMFEKAMQTMNLDIKKMPGKLSKAQIAGGFEALDELQAALDRKANKGVLSDLSRFYTVIPHNFG  
RTPPVIDTVEVLQAKKMDMLVLADIELAQTLLQADKVKKEEEEEKVQEVPHPLDVIDYGLLKCDSLSDLT  
EYKVINTVYKNTGPSYSPLKILNVMSVNREKEEERLNAHKDIDNRLLWHGTNIAVVVAILKSGLRIMP  
HSGGRVKGKIYFASENSKSAGYVGCTSKNLGIMFLNEVALGKEHHITMDDCSLKSPPKGYDSVVARGCTE  
PDPAKDRVLALDGRKITVPQGPPIKMEKYNCTFSQSEYLYVKESQARLRYLILLQF

>XP\_045560960.1 poly [ADP-ribose] polymerase 3 isoform X1 [Salmo salar]  
MAPKRRASSTKANKTGGKKVKQEPDTPKDAFTSAKEALKAAGPEVKGKKRADEHCLLSEQHSGRVHEDY  
DCLMNQTNIGNNNKFYVIVQLCIDDSYYCWTWRGVRGVEGTGQSNLSDLSNSPDKAIRDKEKKFKDKTKNS  
WKERDNFESHGPKYTLIEVQDQDAEVKVCVQKVIKGFPRNILLCTLSDPTQKLIQLIFSNMFKFEAME  
CNMLDIKKMPLGKLSKQIAGGFEVLEIEGAMNASRKLEELSSKFFTTIPHNFGTRPPIVDSSEIVE  
KKKMDMLVLADIEIAQNLKAEKTEKAQMEVEKVPHALDQNYLSLSCKLSLLQRTDQEKFVIERYLKATA  
CSHNQPKIIVMVEDRETEAERFENDGLENRLLWHGTNMAVVAAILKGGLRIMPQSGGRVGRGIYFAS  
ENSKSAAYVRTSKDRGVMLNEVALGKENTITMDDSLKEAPTYGNCVVARQLEPDSKDIFLTLDGKQ  
VAVPQGEPIKQPYQYKDSFFSNSEYLVYKENCQRIRYLLELKF

>XP\_032819077.1 protein mono-ADP-ribosyltransferase PARP3 [Petromyzon marinus]  
MAPKRRKAAAKGKRQKKVKAEPVPPAVDKVETRKALKTEPGSKAKAKIDSACNLANKTGLEVHEDY  
DCLMNQTNIGHNNKKFYIIQLIAGDGKFTYTRWRGVRGEGGQNAMKTFGNVAEAIKDFEKKFKDKTKNNW  
QQRDEFTAHPGKYTLIEHQHEDDEEEGEKPVVSVDAVDGSLTKKVIKPCSLPKQTDLMSLIFSNDMFKD  
AMKEMNLDVKMPLGKLSKAQIGRGFDALAEALRTAAGQRNLESLSTFFFTIIPHNFGMRPVPVINS  
QEIIRNKKMDMLVLADIVLAQSLQADKRAAAAAGEGDVGTVEVPHPLNADYDLKCELELLGENSH  
LAVIQVVAATAPSYMKNVNCVMKNREGECECFKAHEELSNRLLWHGTNIAVVVAILKSGLRIMPHSGG  
RVGRGIYFASQNEKSAQYMGYACDGRGVMLNEVVLNGEFTITKDDCSLKQAPAGYDSVVARGHVEPDK  
KDVILELDGKQVTVPGGRPVQAKFKQSNFSHSEYLVYNENQCRIRYLLVSNK

>XP\_019634302.1 PREDICTED: poly [ADP-ribose] polymerase 3-like [Branchiostoma belcheri]  
MPRAAKRKAATKGGDSASPOLSKMIVAQLKQECTKQGLTAGTKAVLLKRLQENTGAGGKKVTEDTAP  
TTAKAAAEKLLKADSPKTKKYVKVDSFCLNGRGVQDDYDCLMNQTNIGHNNKFYIIQLIRTAGVSPY  
YVNRWRGVRGEPQSGALKGPWDLTEAKKDFEKKFKDKTKNWSKRGSPVFPFKGKYTLLEMDTEETDEDEQ  
DTAEKIALLDQLDGPSKNVPLSSLSQTSLIKLIFDNDFEKMMAKMEIDVRKMPGKLSKAQIAGKFE  
VLDEIEEVLTKGRTSGLTELSRFYTVIPHDFGRVPVPIQNDQEKLRKKMDMLVLVLDGIEIAQAMQKDKD  
KDDGSEATDVKHPDLNLDLNCLELLKPSSEEFKVIKYEATKYSGWRDPKILNVKWDVRSGEGRDF  
KEHDHLENRKLWWHGTNMAVVAAILKTGLRIMPHSGGRVGRGIYFASENSKSAGYVGCASGNVGMFLNE  
VALGKEKRITRDDSSLTKAPSGFDSVVAVGHREPDPKKNTMTKLDGRTVVVPQGPINQTEGQSSSFSQS  
EYLVYKENCQRIRYLLKMKFGS

>AAM50807.1 LD31274p [Drosophila melanogaster]  
MKFAEELGHIVPIEFLDFVEADTEGAIKYINSTCICSWGTDPKSRIPKETTKSLSNSIYTKSMPVSRT  
FKVKDGLAVDPDSGLEDIAHVYVDSNNKYSVVLGLTDIQRNKNYSYKVLKADKADKEKYWIFRSWGRIGT  
NIGNSKLEEFDTSESARNFKIEIYADKTGNEYEQRDNFVKRTGRMYPIEIQYDDDKVLKHESHFTSKL  
EISVQNLIKLIFDIDSMNKTLMFEHIFDMDKMPLGKLSAHQIQSAYRVVKEIYNVLECGSNTAKLIDATNR  
FYTLIPHNFGVQLPTLIEHQIEDLRQMLDSLAEIEVAYSIIKSEDSVACNPLDNHYAQIKTLQVALD  
KNSEFEFSLSQYVKNTASTHKSVDLKIVDVFKVSRQGEARRFPFKFKLHNRKLWWHGSRLTNFVGILSH  
GLRIAPPEAPPTGYMFGKIYFADMVSKSANYCCTSQNSTGLMLLSEVALGDMMECTSAKYINKLSNNK  
HSCFGRGRMFPDFTKSYIRSDGVEIPYGETITDEHLSKSLLYNEHIVYDQVNIQYLFMEFKYSY

>XP\_047143363.1 protein mono-ADP-ribosyltransferase PARP3 [Hydra vulgaris]  
MPKRRKVAQKASSIEETLPIKFSDLKVPKELKAECLRNLEDGKKKADLIERLEEYENQSNTSTKKVK  
KEEKEDEKPVITKDKLALAEKEKADKKMFKVDSLCTLASNASVDDYDCLMNQTNVGHNNKFYVILQ  
TCSGAGYVVMNRGVRGEAGANAIGKPFNDQQYAIKEFTKFKFEKTKNNWEDKNFQPVAGKYTLLEMDG  
EDEPFGYTEKNLDAVDSPLTVKVKTRPCKLDKPTESLILKIFDNDFEKAEMANNIDVKMPLGKLSKSQ  
IAGKFEVLEEIQVEINKNKSSKQLDLSRFFFTLIPHNFGRQRPPTISDQETLQMKMDMLTVLGDIEIAQS  
LQNVVVKKEEVEDHPLDTNYGLLKCDLKHIDCKSDTFKIINNYIEQTKSSYGNIKLLDVWEVDVRMGE  
RFSAHNIDKNRKLWWHGTNMAVVAILKSGLRIMPHSGGRVGRGIYFASEHAKSAGYVGTARDGTGIMFL  
NEVALGKHIIITQDSSSLKAPPKGYDSVLAKRGREPDPMSMTSLIINGNTVTVPGQKPVETDAHSSSFHQ  
SEYLIYKESQNRIRYLLKMKFH

>XP\_019856101.1 PREDICTED: poly [ADP-ribose] polymerase 3-like [Amphimedon queenslandica]  
MPFKRQRKRTAAAKEDEPTTSAVAPLNPAAITVTQLRAELSKGLDITGKKALLVQRLTDSLKSSDEPS

TTKKAKTEDPAEDEGEEDTTEGELTYSKAAAALRQADKKKEGKRQRTVDTHIPWYTNIEVVDDWDCML  
NQTNIHNNKFFYIQLLSNKNNGYFHVWNRWGRVGEFGMNMKGPFHAMDAATKEFAKKFKDKTKNDWS  
DRDSFTPHAGKYTLIEMGGDDDEPMDVIEDVDTGKPKKIKPCTLDKPTQNLVKLIFDNDMFREAMKTL  
EIDTKMPLGKLSKAQIAKGFEALEALESALQSKASRAKLSLSKFFYTIIPHDFGRRIPPPVIDNQEHLQ  
KKFDMLTVLGDIEIAQSLQKDKIKTEQPDIEEVPHFEDVNYASLKAKLEHVKKEDSDYKIIETYLQTEP  
SYRKLEIVDIWRVSRDGEAERFSVHDSIENRLLMHGTNAVVAAILKSGLRIMPHSGGRVGRGIYFASE  
NSKSAGYVGCANNIGIMFLNEVALGKEHSITRDDSSLVKAPAGHDSVVARGHTEPDPALDTTITIDGKT  
TVFQGGPKSQKYSTSSFSQTEYLIYKESQNRIRYLLKLFGGHSFFF

[illegible]

|                              |                                                                |                              |     |
|------------------------------|----------------------------------------------------------------|------------------------------|-----|
| XP_020103931.1[H.sapiens]    | LGNRKLWLHGHGTMMAVVAAILTSLGLRMIPH----                           | SGGRVGKGVIYFASENSKSAGYVIGMKC | 431 |
| XP_020813722.3[P.abellii]    | LGNRKLWLHGHGTMMAVVAAILTSLGLRMIPH----                           | SGGRVGKGVIYFASENSKSAGYVIGMKC | 436 |
| XP_01812381.1[X.laevis]      | IDNRLLWGHGTHIAVVVAALKSLGLRMIPH----                             | SGGRVGKGVIYFASENSKSAGYV--GC  | 445 |
| XP_032819077.1[P.marinus]    | LSNRKLWLHGHGTHIAVVVAALKSLGLRMIPH----                           | SGGRVGKGVIYFASQNEKSAGYVM--GY | 441 |
|                              | : *:*****::: ...*, **** :                                      | * :*:***** ** *              |     |
| AAM50807.1[D.melanogaster]   | QQNSTLMLLESEVALGDMMECTSAK-YINKLSNNHKSCFGRGRTMDFPTKSY-----IRSDG | 512                          |     |
| XP_047143363.1[H.vulgaris]   | ARDGTGIMFLNVAIGKQHITITQDDSLSLAKPPKGYSIVAAKGRPEPDMSTSLIINGNT    | 520                          |     |
| XP_019634302.1[B.belcherii]  | ASGVNGIMFLNVALGEKKRITRDDSSLTKAPSGDVSVAVHGHEPDPKKNTMKLDGRT      | 538                          |     |
| XP_019856101.1[A.jenlandica] | -ANNIGIMFLNVALGKEHSITRDDSSLTKAPAGHDSVAVARGTEPPDALDTITIDGKT     | 559                          |     |
| XP_045506960.1[S.salar]      | TSKDRGMFLNVALGKENITITMDSSLSKEATPGYTCNVARGQLPEPDPKDIFLTLDGKQ    | 490                          |     |
| XP_040537823.1[G.gallus]     | TSKRQGMFLTEVALGKYPCYTIREDTPLTKQPPNGDYVSQAQGRETPEDPAQDEVTLDGKK  | 484                          |     |
| BDJ21147.1[M.musculus]       | GHHQGVYMFLEVALGKEHNHITITDPSLSKPPGFDYSIARGTEPFPDAQDILEELDGQ     | 486                          |     |
| XP_01003931.4[H.sapiens]     | GAHHGVYMFLEVALGREHNHTINDPSLSKPPGFDYSIARGTEPFPDQTDELTLEDGGQ     | 491                          |     |
| XP_020813722.3[P.abellii]    | GAHHGVYMFLEVALGREHNHTINDPSLSKPPGFDYSIARGTEPFPDQTDELTLEDGGQ     | 496                          |     |
| XP_01812381.1[X.laevis]      | TSKNLGMFLNVALGKEHNITMDPSLSKPPGKVDYSVARGTEPFPDKDRVLALDGRK       | 505                          |     |
| XP_032819077.1[P.marinus]    | ACDGRGVFMFLNVLGNFTITDKDCSLKQAFAGDYSVARGHVTEPFPKKDVILELDGKQ     | 501                          |     |
|                              | : *:*****::: ...*, **** :                                      | * :*:***** ** *              |     |
| AAM50807.1[D.melanogaster]   | VEIPYGTEITIDEHLK-SSLIYNLYIVDYDAQNRIYLFRMEFKYSY----             | 557                          |     |
| XP_047143363.1[H.vulgaris]   | VTVFQGKFVETDA-HSSSPHQSEYILYKESQNIIRYLLKMKFH-----               | 582                          |     |
| XP_019634302.1[B.belcherii]  | VTVFQGQFINQIQSQSSSFQSQEYLVYKENQCIRRYLLKMKFGS-----              | 582                          |     |
| XP_019856101.1[A.jenlandica] | VTVFQGQSQKQYKYSTSSFSQEYILYKESQNIIRYLLKMKFGHSHFFF               | 608                          |     |
| XP_045506960.1[S.salar]      | VAVFQGEPIKQFQKDSFFSNSEYLVYKENQCIRRYLLELKFI-----                | 532                          |     |
| XP_040537823.1[G.gallus]     | VLVCQKGFIMPAYKDDSSFFQSQEYILYKESQNIIRYLVQLHF-----               | 526                          |     |
| BDJ21147.1[M.musculus]       | VTVFQGPVPVQCFKFSKSSSFQSQEYILYKESQCLRLYLELHL-----               | 528                          |     |
| XP_01003931.4[H.sapiens]     | VTVFQGPVPVCFEFSSTTSFSQEYILYKESQCLRLYLELVHL-----                | 538                          |     |
| XP_020813722.3[P.abellii]    | VTVFQGPVPVCFEFSSTTSFSQEYILYKESQCLRLYLELVHL-----                | 538                          |     |
| XP_01812381.1[X.laevis]      | ITVFQGPVKMEKYNCSTFSQSQEYLVYKESQARLYLLLLLF-----                 | 547                          |     |
| XP_032819077.1[P.marinus]    | VTVFQGRPVQVAKFKQNSFHSHEYLVYNEQCNIIRYLLVLSNK-----               | 544                          |     |
|                              | : * : *:*****::: ...*, **** :                                  | * :*:***** ** *              |     |

## Percent identity matrix:

```
#
#
# Percent Identity Matrix - created by Clustal2.1
#
#
1: AAM50807.1[D.melanogaster] 100.00 31.67 33.52 30.97 33.13 33.81 31.64 31.39 31.21 33.67 31.72
2: XP_047143363.1[H.vulgaris] 31.67 100.00 57.27 55.57 54.05 51.47 51.87 50.59 50.77 56.98 53.58
3: XP_019634302.1[B.belcheri] 33.52 57.27 100.00 56.89 57.89 55.21 54.31 54.76 55.19 57.12 56.12
4: XP_019856101.1[A.queenslandica] 30.97 55.57 56.89 100.00 55.34 52.91 52.91 50.67 51.52 57.60 53.99
5: XP_045560960.1[S.salar] 33.13 54.05 57.89 55.34 100.00 57.14 57.45 55.09 56.43 61.98 60.04
6: XP_040537823.1[G.gallus] 33.81 51.47 55.21 52.91 57.14 100.00 63.44 61.30 62.38 60.99 55.77
7: EDL21147.1[M.musculus] 31.64 51.87 54.31 52.91 57.45 63.44 100.00 81.40 82.70 62.19 57.34
8: NP_001003931.4[H.sapiens] 31.39 50.59 54.76 50.67 55.09 61.30 81.40 100.00 97.18 59.13 56.62
9: XP_002813722.3[P.abelii] 31.21 50.77 55.19 51.52 56.43 62.38 82.70 97.18 100.00 60.38 57.20
10: XP_018112381.1[X.laevis] 33.67 56.98 57.12 57.60 61.98 60.99 62.19 59.13 60.38 100.00 61.50
11: XP_032819077.1[P.marinus] 31.72 53.58 56.12 53.99 60.04 55.77 57.34 56.62 57.20 61.50 100.00
```
