# Supplementary material for: An Evolutionary Perspective on the Origin, Conservation and Binding Partner Acquisition of Tankyrases
Source: MDPI journal article supplement (doi:10.3390/biom12111688), 2022-11-15
Supplement: s1 [file s1]

# Striatin

**Homo sapiens:**

>sp|O43815|STRN\_HUMAN Striatin OS=Homo sapiens OX=9606 GN=STRN PE=1 SV=4  
MDEQAGPGVFFSNHHFGAGGAKGLGPLAEAAAAAGDGAAGAAQAQYSLPGILHFLQHEW  
ARFEVERAQWEVERAELQAQIAFLQGERKQGENLKDDLVRRIKMLEYALKQERAKYHKLK  
YGTELNQGDMKPPSYDSDEGNETEVPQQNSQLMMWQGRQLLRQYLQEVGYTDTILDVKS  
KRVRALLGFSSDVTDRDDKNQDSVNGTEAEVKETAMIAKSELTDSASVLDNFKFLESA  
AADFSDDEDDDDVDGREKSVIDTSTIVRKKALPDSGEDRDTKEALKEFDLVTSEEGDNE  
**SAGDGCTG**WEKEDQCLMPEAWNVDQGVITKLKEQYKKERKGGKVKRPNRSKLQDMLAN  
LRDVELPQLPSVSGSPSRPSSSRLPEHEINRADEV EALTFFPSSGSKSFIMGADAEALESE  
LGLGELAGLTVANEADSLTYDIANNKDALRKTWNPKFTLRSHFDGIRALAFHPIEPVLIT  
ASDHTLKMWNLQKTAPAKKSTSLDVEPIYTFRAHKGPVLCVVMSSNGEQCYSGGTGDLI  
QGWNTTNPNIIDPYDSYDPSVLRGAFVGHGTDAAVWGLAYSAAHQRLSCSADGTLRLWNTTE  
VAPALSVFNDTKELGIPASVDLVSSDP SHVASFSKGYTISFNMETQQRILTLESNVDTT  
ANSSCQINRVISHPTLPISITAHEDRHIKFYDNNNTGKLIHSMVAHLEAVTSLAVDPNGLY  
LMSGSHDCSIRLWNLESKTCIQEFTAHRKKFEESIHDVAFHPSKCYIASAGADALAKVFV

**Pongo abelii:**

>XP\_002812184.3 striatin isoform X1 [Pongo abelii]  
MDEQAGPGVFFSNHHFGAGGAKGLGPLAEAAAAAGDGAAGAAQAQYSLPGILHFLQHEWARFEVERAQW  
EVERAEILQAQIAFLQGERKQGENLKDDLVRRIKMLEYALKQERAKYHKLKYGTELNQGDMKPPSYDSDEG  
NETEVPQQNSQLMMWQGRQLLRQYLQEVGYTDTILDVKSKVRALLGFSSDVTDRDDKNQDSVNGTE  
AEVKETAMIGKSELTDSASVLDNFKFLESAADFSDEDEDDDDVDGREKSVIDTSTIVRKKALPDSGEDRD  
TKEALKEFDLVTSEEGDNE**SAGDGCTG**WEKEDQCLMPEAWNVDQGVITKLKEQYKKERKGGKVKRPN  
RSKLQDMLANLRDVELPQLPSVSGSPSRPSSSRLPEHEINRADEV EALTFFPSSGSKSFIMGADAEALESE  
LGLGELAGLTVANEADSLTYDIANNKDALRKTWNPKFTLRSHFDGIRALAFHPIEPVLITASEDHTLKMW  
NLQKTAPAKKSTSLDVEPIYTFRAHKGPVLCVVMSSNGEQCYSGGTGDLIQGWNTTNPNIIDPYDSYDPSV  
LRGPELLGHGTDAAVWGLAYSAAHQRLSCSADGTLRLWNTTEVAPALSVFNDTKELGIPASVDLVSSDP SHM  
VASFSKGYTISFNMETQQRILTLESNVDTTANSSCQINRVISHPTLPISITAHEDRHIKFYDNNNTGKLIH  
SMVAHLEAVTSLAVDPNGLYLMSGSHDCSIRLWNLESKTCIQEFTAHRKKFEESIHDVAFHPSKCYIASA  
GADALAKVFV

**Mus musculus:**

>NP\_035630.2 striatin [Mus musculus]  
MDEQAGPGVFFSNHHFGAGGAKGLGPLAEAAAAAGDGAAGAAQAQYSLPGILHFLQHEWARFEVERAQW  
EVERAEILQAQIAFLQGERKQGENLKDDLVRRIKMLEYALKQERAKYHKLKYGTELNQGDMKPPSYDSDEG  
NETEVPQQNSQLMMWQGRQLLRQYLQEVGYTDTILDVKSKVRALLGFSSDVTDRDDKNQDSVINGTE  
AEVKETAMIGKSELTDSASVLDNFKFLESAADFSDEDEDDTDGRAKSVIDTSTIVRKKALPDTSEDRD  
TKEALKEFDLVTSEEGDNE**SAGDGCTG**WEKEDQCLTPEAWNVDQGVISKLKEQYKKERKGGKVKRPN  
RSKLQDMLANLRDVELPQLPSVSGSPSRPSSSRLPEQELSRADDEV EALTFFPSSGSKSFIMGADAEALESE  
LGLGELAGLTVANEADSLAYDIANNKDALRKTWNPKFTLRSHFDGIRALAFHPIEPVLITASEDHTLKMW  
NLQKTAPAKKSTSLDVEPIYTFRAHKGPVLCVVMSSNGEQCYSGGTGGRIQSWSTTNPNDVPYDAYDPSV  
LRGPELLGHGTDAAVWGLAYSAAHQRLSCSADGTLRLWNTTEVAPALSVFNDNQELGIPASVDLVSSDP SHM  
VASFSKGYTISFNMETQQRVLTLESNVDTSSSSCQINRVISHPTLPISITAHEDRHIKFYDNNNTGKLIH  
SMVAHLEAVTSLAVDPNGLYLMSGSHDCSIRLWNLESKTCIQEFTAHRKKFEESIHDVAFHPSKCYIASA  
GADALAKVFV

**Gallus gallus:**

>XP\_040524727.1 striatin isoform X3 [Gallus gallus]  
MDEQAGPGVFFSNNNNNALLPPTTGGPGLEPGEAAAAAAGGGGGGVSAGGAAAPVSASRAQYSV  
PGILHFLQHEWRFEAERAWEAERAELQAQIAFLQGERKQGENLKDDLVRRIKMLEYALKQERAKYHKLK  
KYGTLELNQGDMKPPNYDSDEGNETEIQPQNSQLIWQGRQLLRQYLQEVGYTDTILDVKSKQVRALLGL  
SDSAEKENRNQPEMVNGTEGQIKENAMIGKPELTDSASLLETFFKFLENAAADFSDEEDEDEIEGREKTI  
IDTATIVRKRVLSDSSEDRDT EALKEFDLVTSDSEGDES**SAGDGCTG**WEKEDQCLMPEAWNVDQGVIT  
KLKEQYKKERKGGKVKRPNRSKLQDMLANLRDVEDDLPSLQPSVAPSSRPSSSRLIEHEINRTDEV EALT  
FFPSSGSKSFIMGTDETLENELGGLGELAGLTVANEADSLTYDIGNNTDALRKTWNPKFTLRSHFDGIRGLA  
FHIPIEPVLITASEDHTLKMWNLQKTAPAKKSASLDVEPIYTFRAHSGPVLCVVMSSNGEQCYSGGTGDLI  
HGWNNTNPNIIDPYDSYDPSVLRGAFVGHGTDAAVWGLVYSGTHQRLLSCSADGTVRLWKATEVAPALNVFND  
NQEMGIPSSVDLVSSDP SLMVASFNTGHTSIFNMETRQQRILTLESQVDNTVSTSCQINRVISHPTLPISI  
TAHEDRHIKFYDNNNTGKLIHSMVAHLDAVTS LAVDPNGLYLMSGSHDCSIRLWNLESKTCIQEFTAHRKK  
FDESIHDVAFHPSKCYIASAGADALAKVFV

**Xenopus laevis:**

>XP\_041418671.1 striatin isoform X1 [Xenopus laevis]  
MDEQAGPGVFFNNNNNSLLSAGTGCGGAGKGFEAGAADAASVAGGGGGGSAGRAQYQSIIPGILHFLQHEWA  
RFEVERAQWEVERAEMQAQIAFLQGERKQGENLKDDLVRRIKMLEYALKQERAKYHKLKYGTELNQGDMK  
PPNYDSDEANENIEIQPQNSQFTWKQSRQLLRQYLQEVGYTDTILDVKSKVRSLGLSADSDRLTDT  
NPDMSVNGTETELPNPLVLGKPDMTDSASVLETFFKFLENAAAEFSDEDEEENESRKDTIIDSATIVRRR  
IITDPSNDTTEALKEFDLFGSDDEGGES**SAGDGCTG**WEKEDQCCPITESWNVDQGVITKLKEQYKKERK  
GKVKRPNRSKLQDMLANLRDEVDELPSLQPSVSVSSRPASSRSISEQEINRADEV EALTFFPSSGSKSFIMG  
ADAEALENELGLGELAGLTVANEADSLTYDIANNKDALRKTWNPKFTLRSHFDGIRGLAFHPSPEVLITAS  
EDHTLKMWNLQKTAPAKKSTSLDIEPIYTFRAHRGFPVLCVVMSTNGEQCYSGGTGCVISWNTPNNSNDP  
YDSYDPTVLRGAYEGHGTDAVWGLVYSAVHQRLLSAAADGTRIWNATEVSPALSFNENQELGIPSSVDL  
VSCDPAHLVASFNGGHTNIFNMETQKVLTLESCIDTAVNSTCQINRVISHPTLPISITAHEDRHIKFYD  
NNTGKLIHSMVAHLDAVTS LAVDPNGLYLMSGSHDCSIRLWNLESKTCIQEFTAHRKKSDESIHDVAFHPS  
SKCYIASAGADALAKVFV

**Salmo salar:**

>XP\_045558221.1 striatin-like isoform X1 [Salmo salar]  
MDEQAGPGVFFNNNNNSILAGGKVVLLPEGDAGEAARAPYSIPGILHFLQHEWARFEVERAQWEVQRAELQ  
AQIAFLQGERKQGENLKDDLVRRIKMLEYALKQERAKYHKLKYGTELNQGDMKPPSYDSDEVNENETTGS  
LNQLSWKQGRQLLRQYLQEVGYTDTILDVKSQRVKTLLAMAGDGGGRPGERTGSSETPLVNGTDTVPKGT  
GTGGRKTEVSSSAVLDTFRFYCDDEDDDGAGLDRTIMEQTGTCGTVRKKPSSSSPALSLSMDTSED  
FDABDALKGFDPLSSPDMMDTSPES**SAGDGCTG**WEKEEQSAMSEAWVDQGLITKLKEYEKKERKGGK  
KRNKRSKLQDMLANLRQDEMSPREPSSSPQASNAPRNLNEHQQDNRTDEV EALTFFPSSGKAFIMGDE  
NMEAEGLGELAGLTVANEADSLAYDMSNNKDALRKTWNPKFTLRSHFDGIRGLAFHPIEPVLITAS  
EDHTLKMWNLQKTAPAKKSASVDEMPMYTFRAHQGAVLCVVMSTGEQCFSGGVDGTIQSWNTPNPNLIDPYDS  
YEPYTVLRGALCGHTDLVWGLVYSGVHQRLLSGSGDGTVRLMDASNTKPALATFQNKEGFVSPSSVDLVCS  
PAHMTVSTSGQIGLFNMETQQLVLVLSESAETGTGTCQINKVLSHPTLPITITAEEDRHIKFFDNNNTGKLI  
HSMVAHLDAVTS LAVDPNGLYLMSGSHDCSIRLWNLETKTCIQEFTAHRKKNDESIHDVAFHPSKAYIA  
SAGADALAKVFV

**Petromyzon marinus:**

>XP\_032803414.1 striatin-3-like isoform X1 [Petromyzon marinus]  
MDEHPALQVGS PGLKQLQQPSSGGSGQQQQQQQQQLLQQQLQMHQQQGGEGGESGRPHYSMPGILH  
YIQHEWARFEMERASWDMERAELQARIAFLQGERKQENLKDDLVRRIKMLEYALKQERAKYHKLYGTE  
LNQGDMPKPTTFDAEETNDTDTFPVVTSNSQLTWRQGRQLLRQYLQEVGYTDTILDVRSQRVRSLLGLSGPFP  
DQNGAPDAKNIEQILNGRDIMSILKPEDDAKRRNGDKSRSEPLVPSVVDTFQFLQEEEDSDGDEDDDDDE  
SVGLVDERFRASAKKAKIGNEGLAADLADDPDTEELAKEFDLFLVTTEDEGAGEAASGSDGQVWDKEEL  
SPSGEEDWIDHGLTKLKEQYKKEKRNKKQAKRPNRSALQOMLANREVDBELSPLAASSPFRQPEEARAP  
LPHDNARSDEGESPFPRGTGKMPISGPEEAMDTTGLGELADLTVTNDA DSPSYDIGANKDAFRKKTWNKPF  
TLRSHFDGVRALAFHPSHEHVLVTASEDHTLKLWNLQKTI SGKKTASLDVEPIYTFRAHTGPVLSLAISTS  
GEQCFSGGTDASIRCNWNPSPNIDPYDTFEASVLGQTLHGSDAVWGLAYSSLRRLSCSADGTVRLWD  
PSCQDSPCLNTYNPDKEHGIPVSVDFVSDASHLVATFGGGDTLVFDMETAKPVITLESRIETDTPGLNQ  
INRVVSHPTLPITVTAHEDRHIKFFDNNTGKQVHSMVAHLDAVTCCLAVDPNGLYILMSGSHDCSIRLWNLE  
SKTCVQEITAHRRKKFDEA IHDVAFHPSKAFIASAGADALAKVFV

**Branchiostoma belcheri:**

>XP\_019631056.1 PREDICTED: striatin-3-like [Branchiostoma belcheri]  
MDGSTGNPHAVPGSNQPGMI PNKPQTLQDEQSQOTKYISIPGILHFIQHEWARFEMERAHWEVERAELQ  
ARIAFLQGERKQENLKRDLVRIKMLEYALKQERAKYHKLYGTELNQGEMRPPTPPSDEERETDSPLS  
QNSQVTWRQGRQLLRQYLQEIGYSDTILDVRSNRVRTLLGLTPNESTKQDGEAGEVLVNGQEEREARRDA  
DRRPVEKKRAGIPEIDSEASVLATFDLFSSEAVDDEDEENLSDGEEDGGAADDESEEREQRRRRKEGKKA  
LVQMENESLAGMEDVLADPETEEALAEFDLVSSEAGEGAGEAKSTDGAEWGLDKSPTEEWAMDKNLLN  
KLKEEFFKKERKSKKGAKRPNRSTLQAMLANLGDDDIVMPASGPPRSAINNPDLGPLDEPRKEGGPEEQV  
LGVGPFEESELEAALGLGDLAGLTVTNEAEPLQYDVAATKEAFRKTWNPKYTLRSHFDVRAALAFHP IEF  
VLITASEDHTLKMWNLQKTVPAKKSASLDVEPIYTFRAHSGPVTCLCVSSNGQCYSGSTDSTIRCNWIP  
SPNIDPYDAFDPFTVLQALVGHGDAIWGVTHISVKQQLLSCSADGTVRLWLSLQKSPLLNTYTAEKDGA  
PTSVDFVRCEL SQMVAAYSSSVAVLYDLETAQVAKLDA RQCSDSGVSSQINRVVAHPTLPITITAHEDR  
HIKFFDNNSGKMNTMVAHLDAVTS LAVDPNGLYLLSGSHDCSIRLWNLDSKTCVQEITSHRKKFDESIF  
DVAFHPSKPYIASAGADALAKVFV

**Drosophila melanogaster:**

>NP\_609177.1 connector of kinase to AP-1, isoform A [Drosophila melanogaster]  
MGNTSGATAGINNKPVGGA TGAGVLVGGVGGSNSIGGVLNSLGGGGSGGLSISGLNAGGQNANVGGM  
GNVGDDGNGMVGSGVNNQATTPTQYTI PGILHFIQHEWSRFELERSQWDVDRaelQARIAM LGERCK  
LESLSKDLTRRIKMLEYALRQERAKFYRLKYGTDPFQLNEFKPNSDEAGLAGEVATDSEVPSYSSVNTTW  
RQGRQMRLQYLAIEIGYTDNIIDVRSNRVRSILGNLNNAEHDGSGGLGGGLGGTGGENLSPNINGNESN  
KRASITEGRHTPAKRVQQSIDEIIVDTEAAVMANFELGATEMSDDDEISDDLEMAVATDNDDTDVKLAKR  
AKSGDMLTTEVDGSLGLGELAQLVTNNESD GAYDANSKDGTTGSGAGGAYRKTWNAKYTLRSHFDGVR  
LI FHPEEPVLITASEDHTLKLWNLQKTVQAKKSASLDVEPIYTFRAHTGPVLC LGMSSSGETCYSGGLDG  
NIECWLQPSNIDPYDCYDPNVHSGTLEGHGDAVWGLTTMQSNIVCSADGTVKLWSPYNKEPLLRTYTA  
SEAEVGPSSVDFVRNEVDHIVVAAYS AHCIVYDTETGKQVVRLEAAQEMS GNTGKFINKVSHPTLPITIT  
TAHEDRHIRFDWNTSGTLVHSMVAHLEPVTSLAVDAHGLYLLSGSHDCSIRLWNLDNKTVCQEITAHRRKK  
FDESIFDVAFHATKPYIASAGADGLAKVFV

**Hydra vulgaris:**

>NP\_001296588.1 striatin-3-like [Hydra vulgaris]  
MEIDAKIINGVNKSNNGVSSSNPMVYSIPGILHYIQHEWARFIERAHWEVERAELQARIAFLQGERKG  
QENLKRDILIRRIKMLEFALRKRQKFKHKLKYGTETLKL PDIKDDEDHDLANNEII SNKNHDLVFN YKQGRQ  
LLRQYLQEIGFTDKVLEMR SARIRSLGITTDDLPTEASTKSKKNEKRQEDFTVSLNQEONCFNDPVDT  
DSTEVIEDSVTKNSLESKKVEHETGDTFVLKDFDLGNEELNVDEASNIQNEEQDDMSNVNDESKLNKIK  
QKNETKDRGKKKRNPNKDVKNMLQT FNAGEEELIPPPPQASTPSVPRVSGGVVDEIPVIGDITVLPSSG  
YSRQVKLVAVNHSGVSDVTEVAMGLGD LADLSVSNELGNLDSKDDMRKTWGPKYTLRSHFDGVRSLCFH  
PEAALITGSEDHTLKLWLSQKNVQGKRGNISDLEPVYTFRHS DGLVCCAINSNGTVCSYSGGLDFKIQC  
WNLPSLNIIDLPGPYDPNVLDG DALIGHSDSVWMDLAYHIDTDFLLSCSADGTCKLWNPSIKSPLLETYKSPE  
SGTPTSIVSVCTDGTGVAASYTSESCVYD IETAKPIVTFSPKTYGLSQINKVISHPTHPI LITAHEDR  
HVRFDFLSSGKEVHSMVAHLDAVTS LIDPSGLYILSGSHDGSIRLWSMENKTCIQEITAHRRKKFDEAVF  
DVAFHPSQPYIASAGADALAKVFV

**Nematostella vectensis:**

>XP\_032221713.1 striatin [Nematostella vectensis]  
WYSIDMDSDSGKLPQSSQNIENDSGTKFTIPGILHFIQHEWARFEMERAHWEVERAELQARIAFLQGER  
KQENLKHDLIRRIKMLEFALKQERAKYHRKLYGTDLQGERSPKKEQEKKEEHPNEVTGSSNKPSPMWRQ  
GRQLLRQYLQEVGYTDAILDVRSRVRSLILGSAAEPLAPAQMNQTS PRKPPDGPPEI REPSQSRFPVS  
VQQAPSSHDVVAPNPIRRAPPHIPIPGKKPADEDFESEAAVMANDFDLENDIEDEEENEDEVDDGGSAD  
DEDDERDVLKTERRIIKKPKTDSNEDLSPEEEALDEFK FVMGDDMDSDSTVIEVPTGKDLDEVNIHM  
PDGEGEMAEQDHLHPDGT PKDEWDVDP SMLAKLKEQYKKERKSKKNVKRPPRSALQVMIANLGGDEEMP  
QPQSTPAPATTGPPSVRLVGS RAMSEI PPPIGSVKIPTKTEAAPAASSPPKNEFFEDALGLGELAE LTVN  
NEAEALSYEINKKDEFRKTWNPKFTLRSHFDSIRS VYFHPQEA AVITASEDHTMKLWNLQKTVPQKKSNI  
LDVEPIYTFRHSAAVL SVVISSTSDMCFSGGADGTILCWNIPSLDLDPYGPYSPNVITGALLEVHTDAVM  
GLAVQTNSLQLLSCSSDGTCLRNWPTLKSPLNTFILDKESSCTPTSIDFLRMDTSQMVASYSARA AIF  
DLETAEA VNLDSAKTYNNPSTQINKVSHPTLPVTITAHEDRHIRFFDNNTGKQI HSMVAHLDAVTS L  
AVDPNGLYLLSGSHDCSIRLWNLDSKTCVQEITSHRKKFDESIDYDAFHPHTKPYIASAGADGLAKVFV

**Amphimedon queenslandica:**

>XP\_019858798.1 PREDICTED: striatin-3-like isoform X1 [Amphimedon queenslandica]  
MSIEEAAAPVTRPFMMGPNGPSGPIPSDPGQPQAGYSVPGVLQFIKQEFGRFERERASWEVERAELQGKIA  
FLQGERKGDHNLMDRLVRIKMLEFALKQERNKVYKLTHTGDSGLSLKPPQLDTETNPTVESSLSPLYN  
QKESRQILRDYLREVGFPFWLEARVARNLNIRITLMSSTNQNEPLFP PPAVEAPSETYSKPPHPFPSS  
TGGSIDIVNCTMQEQIGORRDTAESEDAVQVQWTFDPLSNEDSDDEEETEQVATKDLFQGLE  
NTTEPAGLDKGAIMDGDIFYEDRYSKSDNPPDLPIGEEDNEWEFKQVVERQYQYKRKSNKSNISSRPPR  
EQLRQLQQVANTNQPAEEMSSVMGLMGMPVRGHHDLEGVRSVPHRI PDERPEVYSLGIGELYSIANPSDFI  
MNLSTSGSKRWEHKYTMRNHYDAVTCVQFHPMDMLVTGSEDATIKLWSIPKSKKSAI I DVEPAFTF  
RGHTGPGVLSLAVSSDGEVYVSGSADGQLRMQTFPNLSDPFDIYDLDIQKGVLEGHGDAIWGLVFNQNSG  
LLASASADGHCI LWDPVNSSQIKSIVSEEALGSPTSIDFLHGESI VVSYAKV VVYDVETGKPVVTLDS  
ALTYNGTPTTQINKVLSHPTLPFIVITAHEDKYICFFDSKSGQVTHSMTAHMDAVTGLAIDPHGLYILSGS  
HDGSLRFWSMETKTCVQEITAHRRKKFDESIYNVTC HLTKFPFASAGADGIKAVLL

## Alignment

|                                 |                                                                 |     |
|---------------------------------|-----------------------------------------------------------------|-----|
| XP_019858798.1[A.queenslandica] | -----MS--IEEA                                                   | 6   |
| NP_001296588.1[H.vulgaris]      |                                                                 | 0   |
| NP_609177.1[D.melanogaster]     | MTNSGATAGINNKPVGATGAGVLVGGGVGGANSSIGVLSNSLGGGSGGLSISGLNA        | 60  |
| XP_032221713.1[N.vectensis]     |                                                                 | 0   |
| XP_019631056.1[B.belcheri]      | -----MDDGSTGN-----PHAVPPSGSQPMIP--NKPQ                          | 27  |
| XP_032803414.1[P.marinus]       | -----MDEHPALQ---VGSFGL-----KQLQQQPSGGSGQQQ---QQQQ               | 33  |
| XP_045558221.1[S.salar]         | -----A-----GGKVLIP--E---                                        | 28  |
| XP_041418671.1[X.laevis]        | -----MDEQAGPGVFFNNNNNSL-----LSAGTGGGAGK--GFEA                   | 34  |
| XP_040524727.1[G.gallus]        | -----MDEQAGPGVFFSNNNNNN-----ALLLPPTTGGPGLEP--GEAA               | 37  |
| NP_035630.2[M.musculus]         | -----MDEQAGPGVFFSNNHPG-----AGGAKGLGP--LAEA                      | 30  |
| 043815[H.sapiens]               | -----MDEQAGPGVFFSNNHPG-----AGGAKGLGP--LAEA                      | 30  |
| XP_002812184.3[P.abelii]        | -----MDEQAGPGVFFSNNHPG-----AGGAKGLGP--LAEA                      | 30  |
|                                 |                                                                 |     |
| XP_019858798.1[A.queenslandica] | A---PVTRPFMMGP-----NGPSGPIPSDPGQQAQYSVPGVLQFIKQEFGRFERERA       | 56  |
| NP_001296588.1[H.vulgaris]      | -----MEIDAKI--INGVNKSGNVNESSNPMVYSIPGILHYIQHEWARFEIERA          | 48  |
| NP_609177.1[D.melanogaster]     | GGQN--AN--VGMGNGVGGDGGNGMVGGGVNNQATTTPQYTI PGILHFIQHEWSRFELERS  | 118 |
| XP_032221713.1[N.vectensis]     | -----MYSIDMDSSSGKLPQSSQNIENDSGTKFTI PGILHFIQHEWARFEMERA         | 50  |
| XP_019631056.1[B.belcheri]      | T-----LQDEQSQQTKYSIPGILHFIQHEWARFEMERA                          | 60  |
| XP_032803414.1[P.marinus]       | QQQQLLQQQLQMHQQQGG-----EGGESGRPHYSMPGILHYIQHEWARFEMERA          | 84  |
| XP_045558221.1[S.salar]         | -----GDAGEAARAPYSIPGILHFIQHEWARFEVERA                           | 60  |
| XP_041418671.1[X.laevis]        | G-----AADAASVAGGGGG-----SAGRAQYSIPGILHFIQHEWARFEVERA            | 77  |
| XP_040524727.1[G.gallus]        | A-----AAAAAAGGGGGV SAGGAAAPVSASRAQYSVPGILHFIQHEWRFEAERA         | 89  |
| NP_035630.2[M.musculus]         | A-----AAGDGAAGAAARAQYSLPGILHFIQHEWARFEVERA                      | 68  |
| 043815[H.sapiens]               | A-----AAGDGAAGAAARAQYSLPGILHFIQHEWARFEVERA                      | 68  |
| XP_002812184.3[P.abelii]        | A-----AAGDGAAGAAARAQYSLPGILHFIQHEWARFEVERA                      | 68  |
|                                 |                                                                 |     |
| XP_019858798.1[A.queenslandica] | SWEVERAELQKIAFLQGERKGDNLMRDLVRRIKMLEFALKQERNKVYKLTGTD SGLS      | 116 |
| NP_001296588.1[H.vulgaris]      | HWEVERAELQARIAFLQGERKQENLKRDILRRIKMLEFALKRQERKQFHKLYGTDELKLP    | 108 |
| NP_609177.1[D.melanogaster]     | QWDVDRaelQARIAFLQGERKCLSELSKDLTRRIKMLEYALKQERAKFYRLKYGTDPQOL    | 178 |
| XP_032221713.1[N.vectensis]     | HWEVERAELQARIAFLQGERKQENLKHDILRRIKMLEFALKQERAKYHRLKYGTDLGQE     | 110 |
| XP_019631056.1[B.belcheri]      | HWEVERAELQARIAFLQGERKQENLKRDILVRRIKMLEYALKQERAKYHKLKYGTELNQG    | 120 |
| XP_032803414.1[P.marinus]       | SWDMERaelQARIAFLQGERKQENLKDLVRRIKMLEYALKQERAKYHKLKYGTELNQG      | 144 |
| XP_045558221.1[S.salar]         | QWEVQRAELQAQIAFLQGERKQENLKDLVRRIKMLEYALKQERAKYHKLKYGTELNQG      | 120 |
| XP_041418671.1[X.laevis]        | QWEVERAELQAQIAFLQGERKQENLKDLVRRIKMLEYALKQERAKYHKLKYGTELNQG      | 137 |
| XP_040524727.1[G.gallus]        | EWEAERaelQAQIAFLQGERKQENLKDLVRRIKMLEYALKQERAKYHKLKYGTELNQG      | 149 |
| NP_035630.2[M.musculus]         | QWEVERAELQAQIAFLQGERKQENLKDLVRRIKMLEYALKQERAKYHKLKYGTELNQG      | 128 |
| 043815[H.sapiens]               | QWEVERAELQAQIAFLQGERKQENLKDLVRRIKMLEYALKQERAKYHKLKYGTELNQG      | 128 |
| XP_002812184.3[P.abelii]        | QWEVERAELQAQIAFLQGERKQENLKDLVRRIKMLEYALKQERAKYHKLKYGTELNQG      | 128 |
|                                 |                                                                 |     |
| NP_019858798.1[A.queenslandica] | LKPPQLDTET-----NPVTESSLPSLVNQKESRQLRDRYREVGPDPNVLEARVAR         | 168 |
| NP_001296588.1[H.vulgaris]      | DIKDDH-----DLANNEIISNKHDLVFNKYQGRQLLRQYLQIGFTDKVLEMRASR         | 162 |
| NP_609177.1[D.melanogaster]     | NEFKPSNEDAGLAGEVATDSEV--PYSSVNTVTRQGRQMLRQYLAIEGYTDNI DVRSNR    | 237 |
| XP_032221713.1[N.vectensis]     | RSPPK--EQEQKE-----EHPNEVTGSSNKP SMMWRQGRQLLRQYLQEVGYTDAILDVRSNR | 165 |
| XP_019631056.1[B.belcheri]      | EMRPP--TPPSDE-----ERETDSPL--SQNSQVTVTRQGRQLLRQYLQEVGYTDILDVRSNR | 174 |
| XP_032803414.1[P.marinus]       | DMKPP--TFDAEE-----TNDDTTFVVTSSNQLTVRQGRQLLRQYLQEVGYTDITLDVRSQR  | 199 |
| XP_045558221.1[S.salar]         | DMKPP--SYDSDE-----VNENETTG--SLNNQLSWKQGRQLLRQYLQEVGYTDITLDVKSQR | 174 |
| XP_041418671.1[X.laevis]        | DMKPP--NYDSDE-----ANENEIQPPQNSQFIWKQSRQLLRQYLQEVGYTDITLDVKSQR   | 192 |
| XP_040524727.1[G.gallus]        | DMKPP--NYDSDE-----GNETEIQP--QONSQLIWKQGRQLLRQYLQEVGYTDITLDVKSQR | 203 |
| NP_035630.2[M.musculus]         | DMKPP--SYDSDE-----GNETEIQP--QONSQIMWKQGRQLLRQYLQEVGYTDITLDVKSQR | 182 |
| 043815[H.sapiens]               | DMKPP--SYDSDE-----GNETEIQP--QONSQIMWKQGRQLLRQYLQEVGYTDITLDVKSQR | 182 |
| XP_002812184.3[P.abelii]        | DMKPP--SYDSDE-----GNETEIQP--QONSQIMWKQGRQLLRQYLQEVGYTDITLDVKSQR | 182 |
|                                 |                                                                 |     |
| XP_019858798.1[A.queenslandica] | LNLYRTLMSSTNQNEPPL--P-----PPAVEAPSETYSKPPHPHPESSSTGGGS          | 215 |
| NP_001296588.1[H.vulgaris]      | IRSLLGITTTDDLPTEDASTKSK--KNEKRQEDFTVSLNAEQ--N-----              | 202 |
| NP_609177.1[D.melanogaster]     | VRSLGLNNNAEHDDGGSGGLGGGLGGGTGGENLSPNINGNE--SNKRASETE-----       | 287 |
| XP_032221713.1[N.vectensis]     | VRSLGLSAAELAPAQMNQTS--PRKFPDGG-----PZETREPS--QSREPFVSRQQAPSSHD  | 220 |
| XP_019631056.1[B.belcheri]      | VRTLLGLTPNESKQDEA--G-----EVLVNGEQ--EKLARR-----                  | 208 |
| XP_032803414.1[P.marinus]       | VRSLGLSGPPDQNGAPDAKNI-----EQLINGRD--IMSIKP-----                 | 235 |
| XP_045558221.1[S.salar]         | VKTLLAMAGDGGRRPGERTGSE-----TFLVNGTD--TVPKGT-----                | 210 |
| XP_041418671.1[X.laevis]        | VRSLGLSADSRLTDT--NQ-----DSMVNGTE--TELPNP-----                   | 226 |
| XP_040524727.1[G.gallus]        | VRALLGLSSDASEKE--NR--NQ-----EPMVNGTE--GQIKEN-----               | 236 |
| NP_035630.2[M.musculus]         | VRALLGFSSDVTDREDDK--NQ-----DSVINGTE--AEVKET-----                | 216 |
| 043815[H.sapiens]               | VRALLGFSSDVTDREDDK--NQ-----DSVINGTE--AEVKET-----                | 216 |
| XP_002812184.3[P.abelii]        | VRALLGFSSDVTDREDDK--NQ-----DSVINGTE--AEVKET-----                | 216 |
|                                 |                                                                 |     |
| XP_019858798.1[A.queenslandica] | DIVPNGTD---MQEQIGGRRDTEASEDDAVKQVQNTFDLSNEDSDDEDETEWQQVA        | 271 |
| NP_001296588.1[H.vulgaris]      | -----GRHTP--AKKV--QQ--SIDEIIVDTAAV-----CFDNPVDT-----DS          | 312 |
| NP_609177.1[D.melanogaster]     | VVAVPNPIRRAPPHIPPI--GK--KPADEFSEAAVMANFDPLENDIEDEENDEVDVGG      | 277 |
| XP_032221713.1[N.vectensis]     | -----DADRRPVEKKRA--G-----IPEIDSEASVLATFDLSSEAVDDEENLSDGEE       | 256 |
| XP_019631056.1[B.belcheri]      | -----KEDDAKRN--G-----DKSRSEPLVPSVVDTFQFLEEEDSDGDEDDDDDES        | 281 |
| XP_032803414.1[P.marinus]       | -----GTG-----G-----RKTEVSESSALVDTFRFYC-----DEDDDEDGAG           | 243 |
| XP_045558221.1[S.salar]         | -----LVL-----G-----KPMTDASASVLETFKFLNAAEPFSDEDEEENES            | 265 |
| XP_041418671.1[X.laevis]        | -----AMI-----G-----KPELTDASASVLETFKFLNAAADFSDEDEDETEG           | 275 |
| XP_040524727.1[G.gallus]        | -----AMI-----G-----KSELTDASASVLDNFKFLESAADFSDEDEDETDG           | 255 |
| NP_035630.2[M.musculus]         | -----AMI-----A-----KSELTDASASVLDNFKFLESAADFSDEDEDDVDG           | 255 |
| 043815[H.sapiens]               | -----AMI-----G-----KSELTDASASVLDNFKFLESAADFSDEDEDDVDG           | 255 |
| XP_002812184.3[P.abelii]        | -----AMI-----G-----KSELTDASASVLDNFKFLESAADFSDEDEDDVDG           | 255 |
|                                 |                                                                 |     |
| XP_019858798.1[A.queenslandica] | T-----KDLFQGLENTT-----EPAGLDKGAIMDGFVYE                         | 301 |
| NP_001296588.1[H.vulgaris]      | --TEVIEDS-----VTKNSL-----ESKKVEHETGDTFVLKDFDFLGN                | 248 |
| NP_609177.1[D.melanogaster]     | ---SADDED--DERDVLKTERRIK-----KPK--TDSNEDLSPEEEALDEFKFMVG        | 323 |
| XP_032221713.1[N.vectensis]     | DGGAADDES--EERE--QRRRREK GKALVQMENESLAGMEDVLADPETEEALAEFDPLVS   | 314 |
| XP_019631056.1[B.belcheri]      | ---VGLVDE-----RDRPRASKKA-----KIGNEGLAADLADDPTEALKEFDPLVT        | 326 |
| XP_032803414.1[P.marinus]       | LDRTIMEQTGPTGTMTVRKKPPSS-----SSPALSLSMDTSDPDADALKEFDPLSS        | 295 |
| XP_045558221.1[S.salar]         | RDKTIIDS-----ATIVRRK-----IIPSDN--DTEALKEFDPLGS                  | 301 |
| XP_041418671.1[X.laevis]        | REKTIIDT---ATIVRRK-----VLSDSSEDRDTTEALKEFDPLVT                  | 313 |
| XP_040524727.1[G.gallus]        | RAKSVIDT---STIVRRK-----ALPDSSEDRDTKEALKEFDPLVT                  | 293 |
| NP_035630.2[M.musculus]         | REKSVIDT---STIVRRK-----ALPDSGEDRDTKEALKEFDPLVT                  | 293 |
| 043815[H.sapiens]               | REKSVIDT---STIVRRK-----ALPDSGEDRDTKEALKEFDPLVT                  | 293 |
| XP_002812184.3[P.abelii]        | REKSVIDT---STIVRRK-----ALPDSGEDRDTKEALKEFDPLVT                  | 293 |
|                                 |                                                                 |     |
| XP_019858798.1[A.queenslandica] | DRYSSKSDN--P-----PDLPIGEEDNEMEFKQ--VER                          | 331 |
| NP_001296588.1[H.vulgaris]      | EELNVDEASN-----IQNEEQDDW-----SNVDSEKLQNK                        | 278 |
| NP_609177.1[D.melanogaster]     | TEMSDDDEI--S-----DDLE-----                                      | 334 |
| XP_032221713.1[N.vectensis]     | DDDDMDSSTVIEVPTGKDLDEVNIHMPDGEEGMAEQDHLHPDGTPKDEWDVDFSMIAKL     | 382 |
| XP_019631056.1[B.belcheri]      | EA--GEGAGE--AK--ST-----DGAEW-----GL--DKSPTEEEMAMDKNLLNKL        | 353 |
| XP_032803414.1[P.marinus]       | TEDGEAGE--AKSSG-----DGTW-----DKEELSPSGEEWDIDHGLITKL             | 367 |
| XP_045558221.1[S.salar]         | PDNMDTSP--SRSAG-----DGTW-----EKEEKSAMSAAWDVQGLITKL              | 336 |
| XP_041418671.1[X.laevis]        | DDSE--GGE--SRSAG-----DGTW-----EKEDQCPTITESWNVDQGVITKL           | 342 |
| XP_040524727.1[G.gallus]        | SDEG--DGE--SRSAG-----DGTW-----EKEDQCLMPEAWNVDQGVITKL            | 350 |
| NP_035630.2[M.musculus]         | SEEG--DNE--SRSAG-----DGTW-----EKEDQCLTEPAWNVDQGVISKL            | 332 |
| 043815[H.sapiens]               | SEEG--DNE--SRSAG-----DGTW-----EKEDQCLMPEAWNVDQGVITKL            | 332 |
| XP_002812184.3[P.abelii]        | SEEG--DNE--SRSAG-----DGTW-----EKEDQCLMPEAWNVDQGVITKL            | 332 |

|                                   |                                                                 |     |
|-----------------------------------|-----------------------------------------------------------------|-----|
| XP_019858798.1 [A. queenslandica] | YQEYKRSKNKSNKSIIRSPPEQLRQQLQVANTYQPAEEMS-----SVMLGMGMPVRGH      | 383 |
| NP_001296588.1 [H. vulgularis]    | LKQFNENKTRDKGRKSRPNKMMKLQPTFNAG-----EELIPPPQASTPVS-----PRVSGG   | 384 |
| XP_609177.1 [D. melanogaster]     | -----MVAATNDND-----TDVVK-L-----AKR-----                         | 385 |
| XP_032221713.1 [N. vectensis]     | KEQYKKERKSKKNVKRPSRALQVMIANLGGD-----EEMP-PQGSTPAPATGPPSGPVLV    | 386 |
| XP_01631056.1 [B. belcheri]       | KEEFPKKERKSKKGAKNRNSLTQAMLANLGGD-----DDLVP-MPA-SGPPRSAINPNLDG-- | 387 |
| XP_032803414.1 [P. marinus]       | KEQYKKERNKKKGVKPNRSKQDMLANLRV-----DDLS-PLAASSPFR-QPEERAAPLF     | 388 |
| XP_04558221.1 [S. salar]          | KEEYKRCERKGGKGGKPNRSKQDMLANLRQ-----EDMS-PREFFSSPQARSNAPRLNEQ    | 389 |
| XP_04148671.1 [X. laevis]         | KEQYKKERKGGKGVKPNRSKQDMLANLRV-----DELP-SLPQSVSPSSSPASSRISPE     | 390 |
| XP_04054727.1 [G. gallus]         | KEQYKKERKGGKGVKPNRSKQDMLANLRV-----DDLP-SLPQSVAPSSSPSSSRSLIEH    | 391 |
| NP_035630.2 [M. musculus]         | KEQYKKERKGGKGVKPNRSKQDMLANLRV-----DELP-SLPQSVSPSSSPSSSRSLPEQ    | 392 |
| 043815 [H. sapiens]               | KEQYKKERKGGKGVKPNRSKQDMLANLRV-----DELP-SLPQSVSPSSSPSSSRSLPEH    | 393 |
| XP_002812184.3 [P. abelii]        | KEQYKKERKGGKGVKPNRSKQDMLANLRV-----DELP-SLPQSVSPSSSPSSSRSLPEH    | 394 |
|                                   | :                                                               |     |
| XP_019858798.1 [A. queenslandica] | HDLEGV-----RVSHRIPDEREVSIGLIGELVIANPS                           | 417 |
| NP_001296588.1 [H. vulgularis]    | ---YVDDEIPVIGDTLPSSGGVSQRVK---LVAIVNIGSGVDTVEAMGLDADLSDVNS      | 418 |
| XP_609177.1 [D. melanogaster]     | -----A-----KSGKMDLITEVDSGLIGELAGLTVNN                           | 376 |
| XP_032221713.1 [N. vectensis]     | -----GSR-----AMSEIIPPGISVKPIPTKEAAPASPKPNKEFPEDALGIGELAEITVNN   | 491 |
| XP_01631056.1 [B. belcheri]       | -----PLDEP-RKEGGEPGQV-----LVGGVPEESLEAALGGLAGLTVTN              | 497 |
| XP_032803414.1 [P. marinus]       | HDNARSDD-E-GESEFPFGTG-----KMFISGPEEAMD-TTGLGELADLTVTN           | 466 |
| XP_04558221.1 [S. salar]          | HQDNRTDEV-E-GESEFPFGTG-----KAFIMGPNEMAEELGIGELAGLTVAN           | 438 |
| XP_04148671.1 [X. laevis]         | ---EINRADEV-EALTFPPSSG-----KSFIMGADEALENELLGIGELAGLTVAN         | 443 |
| XP_04054727.1 [G. gallus]         | ---EINRTDEV-EALTFPPSSG-----KSFIMGTDTELENELGIGELAGLTVAN          | 451 |
| NP_035630.2 [M. musculus]         | ---ELSRDEV-EALTFPPSSG-----KSFIMGDAEALSELGIGELAGLTVAN            | 433 |
| 043815 [H. sapiens]               | ---EINRADEV-EALTFPPSSG-----KSFIMGDAEALSELGIGELAGLTVAN           | 433 |
| XP_002812184.3 [P. abelii]        | ---EINRADEV-EALTFPPSSG-----KSFIMGDAEALSELGIGELAGLTVAN           | 433 |
|                                   | :                                                               |     |
|                                   | : * : * : * : * : * : * : *                                     |     |
| XP_019858798.1 [A. queenslandica] | --D---FIMN-----PSTSGSKSWEHKYKTMRNHYDAVTCVGFHPHMDMLVGSEDA        | 464 |
| NP_001296588.1 [H. vulgularis]    | ELGNL-----DSKDMQKSGWPKYKTLRSHFDGVRSLCFHPEYAAILTGSEHD            | 433 |
| XP_609177.1 [D. melanogaster]     | ESDGA-YDANSKDGDTGGSGAGGYKTKWAKYTLRSHFDGVRSLCFHPEYAAILTASEHD     | 437 |
| XP_032221713.1 [N. vectensis]     | EAEALSVEYN-----KDEKFPKTNKFKTLRSHFDGVRSLCFHPEYAAILTASEHD         | 442 |
| XP_01631056.1 [B. belcheri]       | EAEPLQDVVA-----ATKEAFKTKWNKFKTLRSHFDGVRSLCFHPEYAAILTASEHD       | 449 |
| XP_032803414.1 [P. marinus]       | EADSPSYDYG-----ANKDAFKTKWNKFKTLRSHFDGVRSLCFHPEYAAILTASEHD       | 518 |
| XP_04558221.1 [S. salar]          | EADSLAYDMS-----NNKDALKRTWNKFKTLRSHFDGVRSLCFHPEYAAILTASEHD       | 493 |
| XP_04148671.1 [X. laevis]         | EADSLAYDIA-----NNKDALKRTWNKFKTLRSHFDGVRSLCFHPEYAAILTASEHD       | 493 |
| XP_04054727.1 [G. gallus]         | EADSLTYDIG-----NNTDALKRTWNKFKTLRSHFDGVRSLCFHPEYAAILTASEHD       | 505 |
| NP_035630.2 [M. musculus]         | EADSLAYDIA-----NNKDALKRTWNKFKTLRSHFDGVRSLCFHPEYAAILTASEHD       | 485 |
| 043815 [H. sapiens]               | EADSLTYDIG-----NNTDALKRTWNKFKTLRSHFDGVRSLCFHPEYAAILTASEHD       | 485 |
| XP_002812184.3 [P. abelii]        | EADSLTYDIA-----NNKDALKRTWNKFKTLRSHFDGVRSLCFHPEYAAILTASEHD       | 485 |
|                                   | :                                                               |     |
|                                   | : * : * : * : * : * : * : *                                     |     |
| XP_019858798.1 [A. queenslandica] | TIKLWSIPKSS-QKKSALIDVEPAITFRGHGTGVPVLSLSSGDEVGVYSGSGADQLRMWNT   | 523 |
| NP_001296588.1 [H. vulgularis]    | TIKLWSLQKSGQKGRGNIISDLVEPYTFRAGHGSDGLVCAANSNGTGYSGGDLRCQWNL     | 493 |
| XP_609177.1 [D. melanogaster]     | TIKLWNLQKTKTQAKKSASLDVEPLYITFFRAHGTVPLVLSGMSSTGTYSGGDLRCQWNL    | 497 |
| XP_032221713.1 [N. vectensis]     | TMKLNWLQKTKPQKSNLIDVEPLYITFFRAHSAALVLSITSDMCSFGDAGTILCWNI       | 602 |
| XP_01631056.1 [B. belcheri]       | TIKLWNLQKTKTQAKKSASLDVEPLYITFFRAHSGPVTCLVSVNSGDTGQSGSDTIRCWNI   | 559 |
| XP_032803414.1 [P. marinus]       | TIKLWNLQKTKSGKTASLDVEPLYITFFRAHGPVLSIASSTGQCSGSDTIRCWNI         | 578 |
| XP_04558221.1 [S. salar]          | TIKLWNLQKTKPAKKSASLDVEPLYITFFRAHQGANLVLCVMSNGEQCSGSDTIRGQSWNT   | 553 |
| XP_04148671.1 [X. laevis]         | TIKLWNLQKTKPAKKSASLDVEPLYITFFRAHSGPVLVCMVSNBQCSGSDTIRGQSWNT     | 563 |
| XP_04054727.1 [G. gallus]         | TIKLWNLQKTKPAKKSASLDVEPLYITFFRAHSGPVLVCMVSNBQCSGSDTIRGQSWNT     | 545 |
| NP_035630.2 [M. musculus]         | TIKLWNLQKTKPAKKSASLDVEPLYITFFRAHSGPVLVCMVSNBQCSGSDTIRGQSWNT     | 545 |
| 043815 [H. sapiens]               | TIKLWNLQKTKPAKKSASLDVEPLYITFFRAHSGPVLVCMVSNBQCSGSDTIRGQSWNT     | 545 |
| XP_002812184.3 [P. abelii]        | TIKLWNLQKTKPAKKSASLDVEPLYITFFRAHSGPVLVCMVSNBQCSGSDTIRGQSWNT     | 545 |
|                                   | : * : * : * : * : * : * : *                                     |     |
| XP_019858798.1 [A. queenslandica] | PNDLSDPFDYIDLQKGVLEGHTDAIWGLVFNQSNGLASASADGHCLIDWPV---NSSQ      | 581 |
| NP_001296588.1 [H. vulgularis]    | PSLNIDLPYDQGVPNVGLDGLIGHSDSVMDLAYHITDITFLDSCADGTCKLNPVS---IKSP  | 551 |
| XP_609177.1 [D. melanogaster]     | PSPNIDPYDGVPNVHSGTLGHTDAIWGLVIT---MQSNVLSGADGTCKLNPVS---NKPE    | 553 |
| XP_032221713.1 [N. vectensis]     | PSLDDLPYDQGVPNVGTALVIEHTDAIWGLVQTNLSQLLSCSSDGTCLRLNPT---LKSP    | 617 |
| XP_01631056.1 [B. belcheri]       | PSPNIDPYDAFDPTLVQALGVIEHTDAIWGLVITHSVKQLLSCADGTCLRLNPT---NKSP   | 610 |
| XP_032803414.1 [P. marinus]       | PSPNIDPYDTEFAEVLQGLTLGHSADWGLVAYSSLRRLRLSCADGTCLRLNPTSDQSPF     | 638 |
| XP_04558221.1 [S. salar]          | PNNLNDPYDTEFVLRGALGCHTDLWGLVYSGVGHQSNGLASASADGTCLRLNPTAS---NTPK | 608 |
| XP_04148671.1 [X. laevis]         | PNNLNDPYDSDVPTVLRGAYEG                                          |     |
