# Supplementary material for: An Evolutionary Perspective on the Origin, Conservation and Binding Partner Acquisition of Tankyrases
Source: MDPI journal article supplement (doi:10.3390/biom12111688), 2022-11-15
Supplement: s1 [file s1]

# PARP9

## Sequences :

>NP\_001139574.1 protein mono-ADP-ribosyltransferase PARP9 isoform a [Homo sapiens]  
MDFSMVAGAAAYNEKSGRITSLSLLPQKVFAQIFPQWRKQNTCECLPYKCSETGALGENYSWQIPINHND  
FKILKNNERQLCEVLQNKFGCISTLVSVPQEGNSKSLQVFRKMLTPRIELSVWKDDLTHAVDAVNAAAN  
EDLLHGGGLALALVKAAGFEIQEESKQFVARYGKVSAGEIAVTGAGRLPCKQIIHAVGPRMWMDDKQCGT  
GKIQRAIVSILNVIYKNTHTKVAIPALSSGIFQFPLNLCTKTIVETIRVSLQGKPMMSNLKEIHLVSN  
EDPTVAFAKASEFILGKSELGQETTPSFNAMVNNLTQLQIVQGHIEWQTADVIVNSVNFHDITVGPVAK  
SILQQAQGVEMKSEFLATKAKQFQRSQSLVLTGFGNLFCKYIYHVLMHSEFFPKPQILKHAMKECLEKCEIQ  
NITSISFPALGTGNMEIKKETAAEILFDEVLTFAKDHVKHQLTVKFVIFPTDLEIYKAFSSEMAKRSKML  
SLNNYSVPQSTREEKRENGLEARSAINLMGFNVSEMYEAHAWIQRIILSLQNHIIENNHHILYLRKKEHD  
ILSQLQKTSVSIITEIISPGRTELEIEGARADLIEVVMNIEDMLCKVQEEEMARKKERGLWRSILGQWTIQQ  
KTKQDEMKENIIFLKCPVPPTQELLDDQKKQFEKCGQLVKVEKIDNEVLMAAFQRRKKMMEELHRQPV  
HRLFQQVPYQFCNVVCRVGFQRMYSTPCDPKYGAGIYFTKNLKNLAEKAKKISAADKLIYVFEAEVLTGPF  
FCQGHPLNIVPPPLSPGAIDGHDSVVDNVSSPETFVIFSGMQAIPQYLWCTCTQEVVQSQDYSSGPMRPPFA  
QHPWRGFASGSPVD

>XP\_002813263.1 poly [ADP-ribose] polymerase 9 isoform X1 [Pongo abelii]  
MDFSMVAGATAYNEKSETGALGENYSWQIPINHNDFNILKNNERQLCEVLQNKFGCISTLVSVPREGNSK  
SLQVFRKMLTPRIELSVWKDDLTHAVDAVNAAANEDLLHGGGLALALVKAAGFEIQEESKQFVARYGKV  
SAGEIAVTGAGRLPCKIIHAVGPRMWMDDTQCGIKLQRAIVSILNVIYENHITKVAIPALSSGIFQ  
FPLNLCTTTIVETIRVNLQGRPMMSNLKEIHLVSNEDPTVAFAKASEFILGKSELGQETTPSFNAMVNV  
NLTLQIVQGHIERQTADVIVNSVNFHDITVGPVAKSILQQAQGVEMKSEFLATKAKQFQRSRLVLTGFGN  
LSCRYIYHVLMHSEFFPKPQVLKHAMKECLEKCEIQNITSISFPALGTGNMEIKKETAAEILFDEVLTFAK  
DHVKHQLTVKFVIFPTDLEIYKAFSAEMAKRSKMLSLNNYSVPQSTREEKRENGLEARSAINLMGFNME  
EVYEAHAWIQRIILSLQNHIIENNHHILYLRKKEHDILSQLQKTSVSIITEIISPGRTELEIEGAQADLIE  
VVMNIEDMLCKVQEEVARKKERGLWRLLGRRTNQKQTKQDEMKENIIFLKYPAPPTQELLDDQKKQFEKCG  
LQVMKEKIDNEVLMAAFQRRKKMMEELHRQPVSHRLFQQVPYQFCNVVCRVGFQRMYSVPCDPKYGAG  
IYFTKNLKNLAEKAKKISAADKLIYVFEAEVLTGSCFQGHLLNIVPPPLSPGAIDGHDSVVDNVSSPETF  
VIFSGMQAIPQYLWCTCTQEVVQSQDYSSGPMRPPFAQHPWNGFTSGSPVD

>XP\_006522818.1 protein mono-ADP-ribosyltransferase PARP9 isoform X1 [Mus musculus]  
MAYYMDTMAAAPAERPGMIASLSLSPFKKFAELFPQRRRGHSEGDPPLRGSSANNSEEHYRWQIPIKHN  
VFIEILKSNESQLCEVLQNKFGCISTLSCPTLAGSSSPAQRVFRRTLIPGIELSVWKDDLTRHVVDAVNAA  
ANENLLHGSGLAGSLVTKGGFEIQEESKRIIANVGKISVGGIAITGAGRLPCHLIIHAVGPRMTVNSQT  
AIELLKFARNILDYVTKYDLRIKTVAIIPALSSGIFQFPLDLCTSIILETIRLYFDQKQMFGNLRIEHLV  
SNEDPTVASFSKASESILGRDLSSWGGPETDPASTMTLRIGRGLTLQIVQGCIEMQTTDVIIVNSGYMDP  
KSGRVAGSILRQAQGVEMKEKLDKVNLSIDIQEVWVTKGFKLSQCIYVHVAVHWSQINKYQILKDAMKSCLE  
KCLKLPNINSISFALGTCMLMDLKKSTAAQIMFEVPAFAKEHKEKTLTVKIVIFPVDVETKYIYAEEMTK  
RSNELNLSGNSGALALQWSSGEQRRGGLAEGSPAINLMGVKVGEMCEAQEWIERLLVSLDHHIIENNHHIL  
YLKKEHDVLSLQTSRVSISETVSPRTATLEIKGPQADLIDAVMRIECMLCDVQEEVAGKREKNLWSL  
SGQGTNQOEKLDKMEESYTFQRYPASLTQELDRKKQFEKCGLWVVQVEQIDNKKVLAAPQEKKKMMEER  
TPKSGSGQRLLFQQVPHQCNTVCRVGFHRMYSYSNVPYAGIYFTKSLKNLADKKKTSSTDKLIYVFE  
AEVLTGSCFQGNSSNIIVPPPLSPGALDVNDNVSSPETIVVFNMGQAMPLYLWCTCTQDRFTSQHPWM  
SQGYSSGPGMWSSLQSMEWVLNGSSV

>XP\_040531610.1 protein mono-ADP-ribosyltransferase PARP9 isoform X1 [Gallus gallus]  
MGTYSQSQSETPKDESGETGPRMDEGSVMIPVNKDTYEALKKRENDRLNLVYKKFACTLTCTKRAAEVYRK  
VLGEGIHLLVYKDDLTHSKADAVNNAANESLEHSGALALALLNAGGPEIAEESRNFIRKHGKVPYTGKIAV  
TGGGKLPCKKIIHAIGPMWYSESEKCCCVLEEAVNVNLYASDPKNNIKSVAIPAVSSGVFGFPVNLCA  
QVTVMSIKLFVETQPSCLKEIHLVNICEQTVAEIKRACEMILGEGSSLQETVPASLSLPPVPVFIKHGNIRL  
RIIKYLEKIRTTAIVSSVSDGFCQSQISTAMLQKAGPTLQAEILSQLKHLHSSKELIVTSGYNLPSDF  
VLHVLWPCFNHVLLCEQLKEIVNRCLYFVRNYPLPSIAFPEKNWSLKLPAIVAEIMIEEVLDFARKPY  
ETKIDVQFVLHPDDDTTYQVFEKMMNLAASKLENNNRSDYLSTESSSQGRKETTNNKMAIELQRTHFAL  
KAAELWQSLVQTQKSHSAVIENNYIFSLGKKEYTELSRVKYSNVMSSEKVKDGKASLEFHGFPDAVIDA  
VLTTKEKLLFMQEQTTAKQELLRLIGQADTQLSEGHLDKTNTTKQFQMLQVDSHLQAFAKDRQKQFERT  
GLHLHLEKIHNPLLSAAQYQTKKNLEQKGVYSKGTGHLYQRVPAQFCTLVCQTFGPHRYSPFPDQRYGA  
GIYFKRNPNSLIEDDGKKETESKIYVFEADVLTGLYTKGKPSYIMPPAVEGDASMLYDSLVDIDNNPDTF  
VICNSLQALPCYLLTCSQVKESPMDL

>XP\_041434303.1 protein mono-ADP-ribosyltransferase PARP9 isoform X2 [Xenopus laevis]  
MEHSITFPISSEELYRPMQGIKETLTKLFAKKFSCQIEVKGPKYLALPGAQGSKLIVYEKKMPGGFRVSTWK  
GDLTMQDVEDAVNNAANDQLEHIGGLALALANAGGPVVEESRRHIEKNGKVKVTGSIATVSAGNLPCSWII  
HAVGPKWVDYKHSQCESELKEVITSILRHVNKDSRITSVAIPAVSSGIFGFPFLTCANILVQAIENFSQ  
VKCDHLQEIRLVNNDKDTVEAMRAACEKILGRSQNWSQIAQAANNQAAAPPYLSPLSINGLNLFLKKG  
NIEEQSNTIIVNSTSSSLDLHGQISNAILNKAGPELQHEIRKYLPPYPTGSMLPTLYRLLPCQFVYHTI  
LPFYSEWFGDPKQILNMLILQCLTQAANIPSQGQRSISFPTLGTGALGFPPIKTVAEIMIHFTFLQFAYNY  
PTMLDVYFVIHPKDEAYYKVFQDTVQTIQKSNINIRVAEEPRETSSQDEKICIIIRGNSSDVQEAETFLT  
QNILVPESIHNHIFLLGKKEHRSLSLSLHFSQAEISEVLNKGKASLEIKGSQKDLASAAVQVEMMLD  
AQEEHAEKLEDELFEASAVQMWYEGRKQMDCFPGDRNRIIEAYMSKSNTELSISGKQMSDFDINLTVKAA  
GTTYRLRYRECHLARDYIPRAHKGKTVAPLFLDLVNPSTKEFKDRAKEMKANLELVKVMVKIQNKVLSA  
VYQSIKSDNKGQVYKRVPSDFCKLIARVGFNRLYMGSGDAEYEGCICFNKQLEDVLEDPTGTGKLGVICF  
QAEVAPGLSETWNMLTPLASDVFSLYDSYMSIDKDPKKVIFDGHRRANPQYWFICWKWGSKV

>XP\_014034922.2 protein mono-ADP-ribosyltransferase PARP9 isoform X2 [Salmo salar]  
MAKSDNIPVEEEMVSIIGQCGPALTALQSKFGCTAVLHGVAASAGAGQSMKEPITFTSQLSKGLRVSV  
WRDDLTHTCGDAVNAAANEHLSHVGLAKALS DAGGPDIQRESDRYINAHGRLLTGVAIVASPGYLPCK  
KIITHVVGSPKPYKQKDDVINIATPKLEKAVRNIL EEMKKHNLKSVAIPAISSGLFPFLPLCADVIVKTL  
KQYHDHNSGAPLEVRVLVNHDDL SVGEMKRACCEILGSTVSHSQPAAAWGLPPKASYSKVVSHNGSTSM  
KNNVNSLNLKGYIETQKTSGIIVNTISSDLDSYGAIKAILQKAGKQIEEISKYNNYNGVDVIETTG  
HKLSRCRVYHTICPNRKQAFEKILGDVISKCLSMQKKTLSISFPAIGTGM LGFNKQEVQAIMVDTAVK  
FAKKNNGTIMDIYVYIPADTETYRAFEDKLSLQGAQTYSSSFNSASAQGFQFTTG YFDSRDPRESAQF  
YIELSSAFDETLEARHWYFSVLPPFKKDTIRNNFIHQFGQHEFEKLLTFQTKFKVSIEVFFKDGACG  
MNIHGASRDVIAAVFEVAMCCKVQEDFAKEEERDIGLRTSTSSPRNPVSESSSDYRHSRLDFSGLEIVR  
VEKVENSALKQVFLKKKQLAVSTSQRMVQRLPAQYCGLLNRVGFQREFAFPDQNYGEGIYFSGSVDA  
KKQWKRLADEVYLYFVEAQVLTGKSTHSGPLVPPVIPSIGNPITLYDSVKGGVDTVCVIFNGHQALPEYL  
IICKNNHAMSSDRN

[illegible]

|                            |                                                              |     |
|----------------------------|--------------------------------------------------------------|-----|
| XP_040531610.1[G.gallus]   | SPPPDQRYGAGIYFKRNPNSLIEDDGKK-ETESKIYVFEADVLTGLYTKGKPSYIMPP-A | 748 |
| XP_006522818.1[M.musculus] | STSYNPVYGAGIYFTKSLKNLADKVKKTSSTDKLIYVFEAEVLTGSPCQGNSSNIIIP-P | 790 |
| NP_001139574.1[H.sapiens]  | STPCDPKYGAGIYFTKNLKNLAEKAKKISAADKLIYVFEAEVLTGFFCQGHPLNIVPP-P | 783 |
| XP_002813263.1[P.abelii]   | SVPCDPKYGAGIYFTKNLKNLAEKAKKISAADKLCVFEAEVLTGSPCQGHLLNIVPP-P  | 748 |
| XP_041434303.1[X.laavis]   | MGSQDAEYEGCICFNKQLDEVLEDPGT-KGLVCIF--QAEVAPGTLSET---WNMLPTP  | 789 |
| XP_014034922.2[S.salar]    | APPDVQNYGEGIYFSGVDGAKKQWKRL-ADEVYLYFVEAQVLTGKSTHGSPGLIVPPVI  | 738 |
|                            | * * * . . . . : : * * . : *                                  |     |
| XP_040531610.1[G.gallus]   | VEGDASMLYDSLVDINNPDFTFVICNSLQALPCYLLTCSQVKESPMDL-----        | 796 |
| XP_006522818.1[M.musculus] | LSPGALDVNDVVDNVSSPETIVFNGMQAMPLYLWTCQDRTFSQHPMWSQGYSSGPGM    | 850 |
| NP_001139574.1[H.sapiens]  | LSPGALDGHDSVVDNVSSPETFVIFSGMQAIPQYLWTCQDEYVQ-----SQDYSSGPMR  | 837 |
| XP_002813263.1[P.abelii]   | LSPGALDGHDSVVDNVSSPETFVIFSGMQAIPQYLWTCQDEYVQ-----SQDYSSGPMR  | 802 |
| XP_041434303.1[X.laavis]   | LASDVFSLYDSYMDSIKDPKKVIFDGHRAFPQYWFICKWKGSKV-----            | 834 |
| XP_014034922.2[S.salar]    | PSGNPITLYDSVKG---GVDTCVIFNGHQALPEYLIICKNNHAMSSDKN-----       | 784 |
|                            | . ** . . . . * : . : * * * *                                 |     |
| XP_040531610.1[G.gallus]   | -----                                                        | 796 |
| XP_006522818.1[M.musculus] | VSSLQSWEWVLNGSSV-                                            | 866 |
| NP_001139574.1[H.sapiens]  | PFAQHFWRGFASGSPVD                                            | 854 |
| XP_002813263.1[P.abelii]   | PFAQHFWMGFTSGSPVD                                            | 819 |
| XP_041434303.1[X.laavis]   | -----                                                        | 834 |
| XP_014034922.2[S.salar]    | -----                                                        | 784 |

### Percent identity matrix:

```
#
#
# Percent Identity Matrix - created by Clustal2.1
#
#
1: XP_040531610.1[G.gallus] 100.00 37.60 39.84 39.92 36.29 34.29
2: XP_006522818.1[M.musculus] 37.60 100.00 61.76 62.45 34.83 35.22
3: NP_001139574.1[H.sapiens] 39.84 61.76 100.00 95.97 36.36 34.93
4: XP_002813263.1[P.abelii] 39.92 62.45 95.97 100.00 35.95 34.52
5: XP_041434303.1[X.laevis] 36.29 34.83 36.36 35.95 100.00 34.14
6: XP_014034922.2[S.salar] 34.29 35.22 34.93 34.52 34.14 100.00
```
