# Supplementary material for: An Evolutionary Perspective on the Origin, Conservation and Binding Partner Acquisition of Tankyrases
Source: MDPI journal article supplement (doi:10.3390/biom12111688), 2022-11-15
Supplement: s1 [file s1]

# TNKS1

## Sequences :

```
>NP_003738.2 poly [ADP-ribose] polymerase tankyrase-1 [Homo sapiens]
MAASRRSQHHHHHHQQQLQAPAGASAPPPPPPPPLSPGLAPGTTPASPTASGLAPFASPRHGIALPEGGD
SRDPDFRPRSPDPVDGTSCCSTTSTICTVAAAPVPAVSTSSAAGVAPNPAGSGSNNSPSSSSSPTSSSS
SSPSSPGSLSAESPEAAGVSTAPLPGAAGPGTGVPVAVSGALRELLAEACRNGDVSVRKRLVDAANVNAK
DMAGRKSSPLHFAAGFGRKDVVEHLLQMGANVHARDGGGLIPLHNACSFGHAEEVVSLLLCQGADPNARDN
WNYTFLHEAAIKGKIDVCIVLLQHGADPNIRNTDGKSALDLADPSAKAVLTGEYKKDELLEAARSNGEEK
LMALLTFLNVNCHASDGRKSTPLHLAAGYNRVRIVQLLQLHGADVHAKDKGGLVPLHNACSYGHYEVTEL
LLKHGACVNAMDLMQFTPLHEAASKNRVEVCSLLLSHGADPTLVNCHGKSAVDMAPTPELRERLTYEFKG
HSLLQAAREADLAKVKKTLALEIINFKQPQSHETALHCAVASLHPKRKQVTELLLRKGANVNEKNKDFMT
PLHVAERAHNDVMEVLHKKHAKMNALDTLGTQALHRAALAGHLQTCRLLLSYGS DPSII SLQGFTAAQM
GNEAVQQILSESTPIRTSDVDYRLLEASKAGDLETIVKQLCSSQNVCNCRDLEGRHSTPLHFAAGYNRVSVV
EYLLHHGADVHAKDKGGLVPLHNACSYGHYEAELLVRHGASVNVADLWKFTPLHEAAAKGKYEICKLLL
KHGADPTKKNRDNPTPLDLVKEGDTDIQDLLRGDAALLDAAKKGCLARVQKLCCTPENINCRDTQGRNSTP
LHLAAGYNNLEVAEYLLEHGADVNAQDKGGLIPLHNAASYGHV DIAALLIKYNTCVNATDKWAFTPHEA
AQKGR TQLCALLLAHGADPTMKNQEGQTPLDLATADDIRALLIDAMPPEALPTCFKQATVVSASLISPA
STPSCLSAASSIDNLTGPLAE LAVGASNAGDGAAGTERKEGEVAGLDMNISQFLKSLGLEHLRDI FETE
QITLDVLADMGHEELKEIGINAYGHRHKLIGKVERLLGGQQGTNPYLT FHCVNQGTILLDLAPEDKEYQS
VEEEMQSTIREHRDGNAGGIFNRYNVIRIQKVNNKLRERFCHRKQEVSEENHNHNHNERMLFHGSPFFIN
AI IHKGFDERHAYIGMFGAGIYFAENSSKSNQVYVIGGGTGCTPHKDRSCYICHRQMLFCRVTLGKSF
LQFSTMKMAHAPPGHHSVIGRPSVNGLAYAEYVIYRGEQAYPEYLITYQIMKPEAPSQTATAAEQKT

>XP_024106876.1 tankyrase-1 [Pongo abelii]
MAASRRSQHHHHHHQQQLQAPAGASAPPPPPPPPLSPGLAPGTTPASPTASGLAPFASPRHGIALPEGGD
SRDPDFRPRSPDPVDGTSCCSTTSTICTVTAAPVPAVSTSSAAGVAPNPAGSGSNNSPSSSSSPTSSSS
SSPSSPGSLSAESPEAAGVSTAPLPGAAGPGTGVPVAVSGALRELLAEACRNGDVSVRKRLVDAANVNAK
DMAGRKSSPLHFAAGFGRKDVVEHLLQMGANVHARDGGGLIPLHNACSFGHAEEVVSLLLCQGADPNARDN
WNYTFLHEAAIKGKIDVCIVLLQHGADPNIRNTDGKSALDLADPSAKAVLTGEYKKDELLEAARSNGEEK
LMALLTFLNVNCHASDGRKSTPLHLAAGYNRVRIVQLLQLHGADVHAKDKGGLVPLHNACSYGHYEVTEL
LLKHGACVNAMDLMQFTPLHEAASKNRVEVCSLLLSHGADPTLVNCHGKSAVDMAPTPELRERLTYEFKG
HSLLQAAREADLAKVKKTLALEIINFKQPQSHETALHCAVASLHPKRKQVTELLLRKGANVNEKNKDFMT
PLHVAERAHNDVMEVLHKKHAKMNALDTLGTQALHRAALAGHLQTCRLLLSYGS DPSII SLQGFTAAQM
GNEAVQQILSESTPIRTSDVDYRLLEASKAGDLETIVKQLCSQNVCNCRDLEGRHSTPLHFAAGYNRVSVV
EYLLHHGADVHAKDKGGLVPLHNACSYGHYEAELLVRHGASVNVADLWKFTPLHEAAAKGKYEICKLLL
KHGADPTKKNRDNPTPLDLVKEGDTDIQDLLRGDAALLDAAKKGCLARVQKLCCTPENINCRDTQGRNSTP
LHLAAGYNNLEVAEYLLEHGADVNAQDKGGLIPLHNAASYGHV DIAALLIKYNTCVNATDKWAFTPHEA
AQKGR TQLCALLLAHGADPTMKNQEGQTPLDLATADDIRALLIDAMPPEALPTCFKQATVVSASLISPA
STPSCLSAASSIDNLTGPLAE LAVGASNAGDGAAGTERKEGEVAGLDMNISQFLKSLGLEHLRDI FETE
QITLDVLADMGHEELKEIGINAYGHRHKLIGKVERLLGGQQGTNPYLT FHCVNQGTILLDLAPEDKEYQS
VEEEMQSTIREHRDGNAGGIFNRYNVIRIQKVNNKLRERFCHRKQEVSEENHNHNHNERMLFHGSPFFIN
AI IHKGFDERHAYIGMFGAGIYFAENSSKSNQVYVIGGGTGCTPHKDRSCYICHRQMLFCRVTLGKSF
LQFSTMKMAHAPPGHHSVIGRPSVNGLAYAEYVIYRGEQAYPEYLITYQIMKPEAPSQTATAAEQKT

>NP_780300.2 poly [ADP-ribose] polymerase tankyrase-1 [Mus musculus]
MAASRRSQHHHHHHQQQLQAPAGASAPPPPPPPPLSPGLAPGTTPASPTAGGLAPFASPRHGIALPEGGD
SRDPDFRPRSPDPVDGAVCTVAAAPAAVPAASAAGVAPTAPAGGGGGGNNSSASSSPTSSSSSSSPSSPG
SPLAESPEAAGVSGTATLGAGAAGLPGVPAVSGALRELLAEACRNGDVSVRKRLVDAANVNAKDMAGRKSS
PLHFAAGFGRKDVVEHLLQMGANVHARDGGGLIPLHNACSFGHAEEVVSLLLCQGADPNARDNWNYYTFLH
EAATKGKIDVCIVLLQHGADPNIRNTDGKSALDLADPSAKAVLTGEYKKDELLEAARSNGEEKLMALLTFL
LVNCHASDGRKSTPLHLAAGYNRVRIVQLLQLHGADVHAKDKGGLVPLHNACSYGHYEVTELLLKHGAC
VNAMDLMQFTPLHEAASKNRVEVCSLLLSHGADPTLVNCHGKSAVDMAPTPELRERLTYEFKGSLLQAA
READLAKVKKTLALEIINFKQPQSHETALHCAVASLHPKRKQVAELLRLRKGANVNEKNKDFMTPLHVAE
RAHNDVMEVLHKKHAKMNALDSLGQALHRAALAGHLQTCRLLLSYGS DPSII SLISQGFTAAQMNEAVQQ
ILSESTPIRTSDVDYRLLEASKAGDLETIVKQLCSSQNVCNCRDLEGRHSTPLHFAAGYNRVSVVEYLLHHG
ADVHAKDKGGLVPLHNACSYGHYEAELLVRHGASVNVADLWKFTPLHEAAAKGKYEICKLLLKHGADPT
KKNRDNPTPLDLVKEGDTDIQDLLRGDAALLDAAKKGCLARVQKLCCTPENINCRDTQGRNSTPLHLAAGY
NNLEVAEYLLEHGADVNAQDKGGLIPLHNAASYGHV DIAALLIKYNTCVNATDKWAFTPHEAAQKGRGTQ
LCALLLAHGADPTMKNQEGQTPLDLATADDIRALLIDAMPPEALPTCFKQATVVSASLISPASTPSCLS
AASSIDNLTGPLTDLAVGASNAGDGAAGTERKEGEVAGLDMNISQFLKSLGLEHLRDI FETE QITLDVL
ADMGHEELKEIGINAYGHRHKLIGKVERLLGGQQGTNPYLT FHCVNQGTILLDLAPEDKEYQSVEEEMQS
TIREHRDGNAGGIFNRYNVIRIQKVNNKLRERFCHRKQEVSEENHNHNHNERMLFHGSPFFINAI IHKGF
DERHAYIGMFGAGIYFAENSSKSNQVYVIGGGTGCTPHKDRSCYICHRQMLFCRVTLGKSF LQFSTMK
MAHAPPGHHSVIGRPSVNGLAYAEYVIYRGEQAYPEYLITYQIMKPEAPSQTATAAEQKT

>NP_989671.2 poly [ADP-ribose] polymerase tankyrase-1 [Gallus gallus]
MAAPPRRSQHHHHHHQQPPPGPASPAAASPPRPSLAPAEGLPAAQRHSLAGPEAGEAPDAERPPAPE
CSGGAAGPFPFGSGSSSGSSASSSSSSSTSSSVASSPAAESPEAAGSAGFRELLEACRNGDTRVKRL
VDAGNVNAKDMAGRKSTPLHFAAGFGRKDVVEHLLQTGANVHARDGGGLIPLHNACSFGHAEEVVSLLLCQ
GADPNARDNWNYYTFLHEAAIKGKIDVCIVLLQHGADPNIRNTDGKSALDLADPSAKAVLTGEYKKDELLE
AARSNGEEKLMALLTFLNVNCHASDGRKSTPLHLAAGYNRVRIVQLLQLHGADVHAKDKGGLVPLHNACSY
GHYEVTELLLKHGACVNAMDLMQFTPLHEAASKNRVEVCSLLLSHGADPTLVNCHGKSAVDMAPTPELR
ERLTYYEFKGSLLQAAREADLAKVKKTLALEIINFKQPQSHETALHCAVAHVPKRKQVTELLLRKGANV
NEKNKDFMTPLHVAERAHNDVMEVLHKKHAKMNALDTLGTQALHRAALAGHLQTCRLLNLSYGS DPSII S
LQGFTAAQIGNEAVQQILSESTPIRTSDVDYRLLEASKAGDLETIVKQLCSSQNVCNCRDLEGRHSTPLHFA
AGYNRVSVVEYLLHHGADVHAKDKGGLVPLHNACSYGHYEAELLVRHGASVNVADLWKFTPLHEAAAGK
KYEICKLLLKHGADPTKKNRDNPTPLDLVKEGDTDIQDLLRGDAALLDAAKKGCLARVQKLCCTQENINCR
DTQGRNSTPLHLAAGYNNLEVAEYLLEHGADVNAQDKGGLIPLHNAASYGHV DIAALLIKYNTCVNATDK
WAFTPHEAAQKGR TQLCALLLAHGADPTMKNQEGQTPLDLATADDIRALLIDAMPPEALPTCFKQATV
VSASLISPASTPSCLSAASSIDNLTGPLAE LAVGASNTDGAAGTERKEGEVSGGLDMNITQFLKSLGLE
HLRDI FETE QITLDVLADMGHEELKEIGINAYGHRHKLIGKVERLLGGQQGTNPYLT FHCVSQGTILLDL
APDDKEYQSVEEEMQSTIREHRDGNAGGIFNRYNVIRIQKVNNKLRERFCHRKQEVSEENHNHNHNERM
LFHGSPFFINAI IHKGFDERHAYIGMFGAGIYFAENSSKSNQVYVIGGGTGCTPHKDRSCYICHRQMLF
CRVTLGKSF LQFSTMKMAHAPPGHHSVIGRPSVNGLAYAEYVIYRGEQAYPEYLITYQIVKPEAPSQGT
AAEQKT

>XP_018099068.1 poly [ADP-ribose] polymerase tankyrase-1 isoform X2 [Xenopus laevis]
MAAPSRRSQQQQVPTAAAGQSSQPPSPASPPSPSSRRRAASCCLSPCSPNETNALSLSREGPDSEPEGEAAS
QPGITPFRPLSPPPGEAANILSPTSSLPPAPAPSSGSSSSSSSPSSNSLCTGGSPAESPESGIVGGVSSVG
ITGGDPDLSAVSGAFRELFACRNGDVSVRKRLLEPANVNAKDMAGRKSTPLHFAAGFGRKDVVEHLLQTG
ANVHARDGGGLIPLHNACSFGHAEEVVTLLLCQGADPNARDNWNYYTFLHEASIKGKIDVCIVLLQHGADPN
IRNTDGKSALDLADPSAKAVLTGEYKKDELLEAARSNGEEKLMALLTFLNVNCHASDGRKSTPLHLAAGY
NRVQIVQLLQLHGADVHAKDKGGLVPLHNACSYGHYEVTELLLKHGACVNAMDLMQFTPLHEAASKNRVE
VCSLLLSHGADPTLVNCHGKSAVDMAPTPELKERLSYEFKGSLLQAAREADLAKVKKTLALEIINFKQPQ
SHETALHCAVASLHPKRKQITTELLLRKGASVNEKNKDFMTPLHVAERAHNDVVEVLHKKHAKMNALDT
LGQ TALHRAALGGHLQTCRLLSFGSDASIVSLQGFTAAQMNEAVQQILNESTPVRTSDVDYRLLEASK
AGDLDIKVQLCSSQNVCNCRDLEGRHSTPLHFAAGYNRVSVVEYLLHHGADVHAKDKGGLVPLHNACSYGH
YEAELLVRHGASVNVADLWKFTPLHEAAAKGKYEICKLLLKHGADPTKKNRDNPTPLDLVKEGDTDIQD
LLRGDAALLDAAKKGCLARVQKLCCTQENINCRDTQGRNSTPLHLAAGYNNLEVAEYLLEHGADVNAQDKG
GLIPLHNAASYGHV DIAALLIKYNTCVNATDKWAFTPHEAAQKGR TQLCALLLAHGADPTMKNQESQTP
LDLATADDIRALLIDAMPPEALPTCFKQATVVSASISPPSTPSCLSAASSIDNLTGPLAE LAVGVSN
AGDGAAGTERKEGEVTVLDININQFLKSLGLEHLRDI FETE QITLDVLADMGHEELKEIGINAYGHRHKL
IGKVERLLGGQQGTNPYLT FHCVSQGTVLLDLSADDDKEYQSVEEEMQNSIREHRDGNAGGVFNRYNVIR
IQKVNNKLRERFCHRKQEVSEENHNHNHNERMLFHGSPFFINAI IHKGFDERHAYIGMFGAGIYFAENSS
KSNQVYVIGGGTGCTPHKDRSCYICHRQMLFCRVTLGKSF LQFSTMKMAHAPPGHHSVIGRPSVNGLAY
AEYVIYRGEQAYPEYLITYQIMKPETPLQAATTAEQKT
```

>XP\_014017013.1 poly [ADP-ribose] polymerase tankyrase-1-like isoform X4 [Salmo salar]  
MAVSRSSSSQQQGNLLSPPRNGSLVSPPGSPSLNLVTATLVPPDGERGCGSTGMENPLASPDLTQSALSS  
GSSTSPSTTTTSGGGSSSVSSPGSGGTTPGDGGSGIGGAFRELFEACRNGDVRVKRLVDSVNVNAKDMAGR  
KSTPLHFAAGFGRRKDVVHLLQTGANVHARDGGGLIPLHNACSFGHAEVVSLLLCQGADPNARDNNWYTP  
LHEAAIKGKIDVCIVLLQHGADPNIRNTDGSALDLADPSAKAVLTGEYKDELLEAARSGNEEKIMALL  
TFLNVNCHASDGRKSTPLHAAAGYNRVIRVQLLLQHGADVHAKDGGGLVPLHNACSYGHFEVTELLLKHG  
ACVNAIDLWQFTPLHEAASKNRVEVCSLLLSHGADPTLLNCHSKSAIDAAPTRELKRLITVEFKHGSLAQ  
AAREADMAKVKKTALLETISFKHPQTGTALHCAVASHPHKKQVTELLLRKGANINEKNDKFTALHVA  
SERAHNDILEVLQKHGAKVNAVDTLGGTALHRAALAGHQTICRLLLSYGADPAIVSLQGFTASQMGNEAV  
QQILANENVPTNSDVYRFLAAKAGDLDTVQQLCTPQNVNCRDLEGRHSTPLHFAAGYNRVAVVEYLLH  
HGADVHAKDGGGLVPLHNACSYGHFEVTELLVHSGASVNVADLWKFTPLHEAAAKGKYEICKLLKHGAD  
PTKKNRGNMPLDMVKDGDITDIDLGRDAALLDAAKKGCLARVQKLCSPENINCRDTQGRNSTPLHLAA  
GYNNLEVAEYLLHGGADVNAQDKGGLIPLHNAASYGHVDIAALLIKFNTCVNATDKWAFTPHEAAQKGR  
TQLCALLAHGADPTMKNQEGQTDALDLATADDIRALLMDAMPDALPSCFKPQATVVSAGSVISPASTPS  
CLSAASSIDNLAGFINELGAAGTSGVADGATGSDRKEGELVMDMNISQFKLGLLEHLRDIIFEREQISL  
DVLADMGEELKEIGINAYGHRHKLIGKVERLLGGQQGANPYLTFHCANQGTVIDLAPDDKEGQSVVEE  
MQSTIREHRDGGNAGGVFSRYNIIKIQKVVNKKLRERYTHRQKEISDENNNHNNRMLFHGSPFFINAIH  
KGFDERHAYIGMGFGAGIYFAENSSKSNQYVYIGGGTGCPTHKDRSCYLCRQMLFCRVTLGKSFQFS  
AMKMAHAPPGHHSVIGRPSVNGLAYAEYVIYRGEQAYPEYLITYQILKPESTATSAAGEDQKS

>XP\_032806710.1 poly [ADP-ribose] polymerase tankyrase-2 [Petromyzon marinus]  
MAARAHLASPSSSSSLSPSSGSLDTTTAAAAAAATTTAAAAAATTTAAAVSATSSPSTTAAA  
AAAAAAAATGSGPGSGQDSSADGGDAGKELFEACRNGDVRVKRLVSPLVNWARDTTGRKSTPLHFAAG  
FGRRDVEHLLQNGANVHARDGGGLIPLHNACSFGHAEVNVNLLRQGDADPNARDNNWYTPHEAAIKGKI  
DVCIVLLQHGADPGIRNTDGKTALDLAEPTAKAVLTGEYKDELLEAARSGNEEKIMALLTFLNVNCHAS  
DGRKSTPLHAAAGYNRVIRVQLLLQHGADVHAKDGGGLVPLHNACSYGHFEVTELLVKHGASVNAIDLWQ  
FTPLHEAASKNRVEVCSLLLSYGADPTLLNCHSKSAIDLAPTSELKERVYEFKRGHSLQAAREADVTRV  
KKHLGLDINFKHPQTHETALHCAVASPYPKRKQVSELLLRKANVNEKTKDLLTFLHVASDKAANDVID  
VLLKHGAKINVTDSLQGTSLHRAAHAGHLTTICRLLSHGCDPNLSLQGTAAQLGNEVSQQILHESSLP  
VRNSDVEHQLLEAAKAGDLDTVQKLCCTTQTVNCRDMDEGRHSTPLHFAAGYNRVSVVEYLLQHGADVHAKD  
KGLVPLHNACSYGHFEVTELLVKGAVNVNADLWKFTPLHEAAAKGKYEICKLLKHGADPTKKNRGN  
TFLDLVKEGDTDIDLGRDAALLDAAKKGCLARVQKLCSENVNCRDSQGRNSTPLHAAAGYNNLEVAE  
YLLEHGADVNAQDKGGLIPLHNAASYGHVDIAALLIKYSACVNATDKWAFTPHEAAQKGRGTQLCALLLA  
HGADPSMKNQEGQTPDLATADDVRALLIDAMPPEALFVTHKPPSIPTIAATSAATAALALGPTPALAS  
LAPSPVPSGASAGAGVPLLASPSSTPASLSAASSMDSLTGACGVAPSPVPAGAIAGAAGDGLTGAC  
GVSAAADGATGPADKPDRAADFEIPLDMNINMFLKGLGLDHLRDIFEKEQITLDVLADMGEELKEIGIN  
AYGHRHKLIGKVERLLGAQGGGLAYPGANPYLSYHTTAQGTLLIDLPPDDKEYQSVEDEMQSTIREHKDQ  
GQAGGVFNRYNVIKIQKVRNKKLWERYTHRRKEVTEENNNHNNRMLFHGSPFFINAIKNGFDERHAYIG  
MGFGAGIYFAENSSKSNQYVYIGGGTGCPVHKDRSCYICRQMLFCRVTLGKSFQFSAMKMAHSPPGH  
HSVIGRPSVNGLAFAEYVIYRGEQAYPEYLITYQILKPECTPDLTSAAGQKS

>XP\_019641281.1 PREDICTED: tankyrase-1-like isoform X1 [Branchiostoma belcheri]  
MAGFRAMLSRDRTHCESGCRELFEACRNGDVARVKKLTTPQNVNWARDTAGRKSTPLHFAAGFGRRKDVV  
EHLLLQGANVHARDGGGLIPLHNACSFGHAEVVTLLLRNGADPNARDNNWYTPHEAAIKGKIDVCIVLL  
QNGADPSIRNTDGKTALDLAEPSAKTVLTGDYKDELLEAARSGNEEKIMALLTFLNVNCHASDGRKSTP  
LHAAAGYNRVIRVQLLLQHGADVHAKDGGGLVPLHNACSYGHFEVTELLKHGASVNAIDLWQFTPLHEA  
ASKSRIVEVCSLLLSHGADPTLLNCHSKSAIDVASTPELQEKLSYEFKGHCLLDGARQTDMAKVKHKLQD  
IVNFKHPYTHDTALHCAALSYPKRRQITELLIRKGANLNDKNEFLTPLHVASDKCYIDVMEVLLKHGA  
KNVALDLSLQGTALHRAAGHGVQACRLLLSFGVDPSIVSLQGVTAQAQMTEAVQMLHEDPPSGPADECD  
QLLEAAKAGDLEAVKVLNPFHTVNCRDVNGRSTPLHFAAGYNRVAVVEYLLQHGADVHAKDGGGLVPLH  
NACSYGHFEVTELLKHGASVNVADLWKFTPLHEAAAKGKYEICKLLKHGADPNKKNRDNPTFLDLVRD  
GDTDIDLGRDAALLDAAKGNLARVQKLTATPENINCRDTQGRNSTPLHAAAGYNNLEVAEFLLENGAD  
VNAQDKGGLIPLHNACSYGHVEIAQLLIKYGTCVNATDRWNFTPLHEAAQKGRGTQLCALLAHGADPTMK  
NQEGQTPDLATAEDVRALLVDAMPQSLPAATIAATVKAASPISSPSTTPSGVLSTASSMDHLVGA  
VGGAGQGDGAIDRSASVEGESLDMTISSSLQQLGLNQLLDIFNKEQITLDILGEMGEELKEIGINAYGH  
RHKLILKGVIRILGGTGTTLNPLYLTPALGSHGTILTDLSPPDDKEYQSVEEVEQSTIRQHKDQQAGGIFNR  
YNYVIKIQKVRNKKLRDRIYHRRKEVSEENNHQSNERMFLFHGSPFFINAIKNGFDERHAYIGMGFGAGIY  
AENSSKSNQYVYIGGGTGCPHKKDRSCYICRQMLFCRVTLGKAFQFSAMKMAHAPPGHHSVIGRPSV  
GGNLFAEYVIYRGEQAFPEYLITYQIVKPEAAPSPDQK

>NP\_651410.1 tankyrase, isoform A [Drosophila melanogaster]  
MANSSRSRAILSVNLDVAMNDPLRELFEACKTGEIAKVKKLTTPQTVNARDTAGRKSTPLHFAAGYGRR  
EVTEFLPLNSGASIQACDEGGLHPLHNCCSFGHAEVVRLLLKAGASPNTTNNWYTPHEAASKGVKDVCIL  
ALLQGHGANHTIRNSEQKTPLELADEATRPVLTGEYKDELLEAARSGAEDRLLALLTFLNVNCHASDGRR  
STPLHAAAGYNRIGIVEILLANGADVHAKDGGGLVPLHNACSYGHFDVTKLLIQAGANVNANDLWAFPTL  
HEAASKSRVEVCSLLLSRGADPTLLNCHSKSAIDAAPTRELREERIAFEYKGHCLLDACRKCDEVSRACKLV  
CAETVNVFHPYTGDTPLHLAVVSPDGKRRKQIMELLTRKGSLLNEKNKAFITPLHLAAELLHYDAMEVLLK  
QGAKNALDLSLQGTPLHRCARDEQAVRLLLSYAADTNIVSLEGLTAAQLASDSVLKLLKNPFPDSETHLLE  
AAKAGDGLTVRRIVLNNPISVNCRDLDGRHSTPLHFAAGFNRVVQVFLLEHGAEVYAADKGGGLVPLHNA  
CSYGHFEVTELLVKHGASVNVSDLWKFTPLHEAAAKGKYEICKLLKHGADPMKKNRDNATPADLVKESD  
HDVAELLRGPSTALLDAAKGNLARVQRLVTPESINCRDAQGRNSTPLHAAAGYNNFECAEYLLLENGADV  
AQDKGGLIPLHNACSYGHLDTAALLIKHKTVVNATDKWGTFTPLHEAAQKGRGTQCLCSLLLAHGADAYMKNQ  
EGQTPLELATADDVKCLLDAMATSLSQQALSASTQSLSSTSSPAPDATAAAGPTSSSSSSAILLSPTTET  
VLLPTGASMILSVVPVPLTSSSSTRISPAQGAEEANGAEGSSSDLLPDADTITNVSGFLSSQQLHHLIELF  
EREQITDILAEIMGHDDLKQGVSAFYGRHKILKGIAQLRSTTGIGNNVNLCITLLVDLLPDDKEFVAVEE  
EMQATIREHRDNGAGGQYFTRYNIIRVKVQNRKKLWERYAHRQKEIAEENFLQSNERMFLFHGSPFFINAI  
RQGFDERHAYIGMGFGAGIYFAEHSSKSNQYVYIGGGIGCPSHKDKSCYVCPRQLLLCRVALGKSFQY  
SAMKMAHAPPGHHSVIGRPSAGGLHFAEYVIYRGEQAYPEYLITYQIVKPPDDSSSGTETDR

>XP\_032220531.1 poly [ADP-ribose] polymerase tankyrase-1-like [Nematostella vectensis]  
MPQARMAASKLASNPTFLSDPDVEGGRELFEACRNGDVRVKRLVNNNSVNVDRDTAGRKSSPLHFAA  
FGRRKEVVEYLLQCGADVHARDGGGLIPLHNACSFGHAEVVRILLSHGADANARDNNWYTPHEAAVKKG  
VDVCVVLLQHGADPNIRNTDGKTALDVAEAAKVLVTGDYKDELLEAGRSNEEKIMSLTFLNVNCHAS  
SDGRKSTPLHAAAGYNRVGVQLLKHGADVHAKDGGGLVPLHNACSYGHFEVTELLIKHGASVNAIDLW  
QFTPLHEAASKARVEVCALLLHGADPTLLNCHSKSAIDAAPTRELQEKLLSEFKHQILEAAKCGDCTAK  
IKKLTITETINFQHPLTLDTPHLVAVASSPKKKGVETLLKKGADPNLQNKSSYAPLHVAAEKLFEAM  
ELLLKHGAKVNAIDAGQTAHVAAIAGVQACRVLMNSGADPTCQTQFGYTAFAVEAPEFQVKVLHVNEE  
SPSPVSDAEKQLLEAAKTGDLTEVKNLCTAQTVNCRDLDRGSTPLHFAAGYNRVVVEYLLNGADVHA  
KDKGGLVPLHNACSYGHFEVTELLVHGAIVNVADLWKFTPLHEAAAKGKYEICQLLLKHGADPQKKNRD  
GYTFLDLVKEGSDVADLLRGDAALLDAAKGNLIRITKLATPENINCRDTQGRNSTPLHAAAGYNNHLE  
AEYLLLEHGADVNAQDKGGLIPLHNACSYGHVDIAALLIRYNTDVNATDRWLTPLHEAAQKGRGTQLCALL  
LAHGAEPSMKNQEGQSPVDLATAEDVKCLLDAMLSTQTTSVSTAPVAKVPAPVATAGAATPATGPISG  
MAPLSQANSSILLANSAGHGADGAFSNRSYEAQGEAVRSISAVHPGLDLDVVGQFLDGLQLNNLKEIFERE  
QISWDVILVMGHEELKEIGINAYGHRHKLKAVKEKISGMGLGLGPFSTSQVGSVIQELSMVDKDFASV  
ADEMQSTIREHRDNGAGGVTSYTILKIERVNVTKLWEKYVYRREIADSNHNNHANRMLFHGSPFFINA  
IVQGFQDRHAYIGMGFGAGIYFAENSSKSNQYVYIGGGGCTPHKDRSCYSCERQLLLCRVALGKFPFY  
QFSAVKMAHAPPGHHSVIGRPSGGLSFAEYVIYRGEQAYPEYLITYQIVKINKPDT

>XP\_047128184.1 poly [ADP-ribose] polymerase tankyrase-2-like isoform X1 [Hydra vulgaris]  
MALGRNRPAMPSPRRNSVASNFMQGVHENDSGRELFEACRTGDIVRVIRYLQNNWDVNMRTDAGRKSTPL  
HFAAGFGRRKDIVYLLDAGADVHARDGGGLIPLHNACSFHGEVETLSLLRHADVARNARDNNWYTPHEAA  
IKGKVEVCIALLQHGADPLIRNTDGKTARDLAEATAKAVLTGEYKKEELLEDSARSGCEEKMLSLITSLVN  
NCHAGDGRKSTPLHAAAGYNRTRIVEILLKHGADVHAKDGGGLVPLHNACSYGHFEVTELLVKHGASVNA  
MDLWQFTPLHEAASKMRIVECTLLSYGADPTVLNCHSKSAIDVAPVQELDKLLIYEGRHTYLEAVKSS  
DLSKIKRIIAPDLVNVFPLTINSALHVCALSTSAKRDRVADFLIKKGCNMNFCNKQKLTPLHLCAIGNDN  
VVVTEILIKAGADCNIVNESLQSPHLTAAQSGHAHICYLLMNGADPTIRNSSGYTPAQVGTESVQKIFQ  
ARLEPMLKDVNDINLEASTGDFELIQSLCTPQNVNCRDVAGRMSTPLHFASGYNRMIDIVEHLLRCGADV  
HAKDGGGLVPLHNACSYGHFEIAELIVRHGANVNAADYWKFTPLHEAAAKGKFDICKLLKHGADPKKKN  
HEGYTFLDLVKEGFPDVADLLRGDAALLDAAKGNLAKVMKLVTHQININCRDTLGRNSTPLHAAAGYNH  
VEAYLLEFGADVNAQDKGGLIPLHNACSYGHVDIAALLIKYKADVNTDRWLTPLHEAAQKGRGTQLCALL  
LLLTHGANANMKNQEGQTPIDLATADDVQLLDQSMVSKSEVMQITSNCTSIKSPINSQVPLISNDLSP  
QLEFPQGLTKPTANQILLSEPCNSDGLQTKRLRQAEGTNPDLIDIGTFLSSLQLEFLHEIFSRREQITMS  
DVLIEMGPDQKEIGIVAYGHRHKLIGKVERLAGAGCTIVGEPFLSNINASGPNITLQELSMDEKDYQS

VAEEMQSTVVEHKDGGVAGGIFSRYSCLKIERVINKKLWDKYYYQRKQVADANHNHPNERMLFHGSPFVN  
AIVQKGFDERHAYIGMGFAGIYFAEHSSKSNQYVYVYIGGGSGCPVHKDRSCYDCKRQIILCRVTLGKPF  
FQNSAMKMAHAPPGHHSVIGRPNSSGLSYPEYVYVYRGEQAYPEYLITYKIERPNTLSSCQSAVD

>XP\_019848937.1 PREDICTED: tankyrase-2-like [Amphimedon queenslandica]  
MDTRDHQAKIPGDSRQTSQSIEEGESADKNTGDLARLFEACKNGDIDTVQNLIQQRQSSANERDLHGRKS  
TPLHFAAGFGRRDIVKFLIEKGAHVDFRDEGGLIPLHNSCSFGHVDVVQQLLSNGANPNQAQDNWKFSPPLH  
EAAIKGADVCIYLLQHGAUSSLLNTRKAPIDLANGQAREVLLGTYYRQDELLAAKVGDEQLLMQILTP  
LNYNCHASDCRRSTPLHLAAGYNRTSIVQQLLKQGADVHAKDKGGLVPLHNACSYGHYVEAELLKYGAS  
INVTDLMQFTPLQEAASKGRSDVCSLLLAHGANPSIANCHGKTAFNLLAPSEEFKKLDSYRGYQLLAAA  
EDGGIILLKLLSSQLLKFOHHQTLDTLLHKAVLSKSSNRQSVIDALLKRGINLNIGNKENMTPLICAAK  
KGILEVVEQLVQRGANINHODINGMTSLHWAVQNEHAQICRYLLSSGANPSIVNNQGTITYQLKTSDDTIQ  
LILKNEPPVSQFBEIEQQLLEAARNSDLEILKKICTPQNVNCRDTRKRMSTPLHFAAGYNRVTVVEFLEN  
GADVHAKDKGGLVPLHNACSYGHYVEAELLKYKANVNAMDLMKFTPLHEAAAKEKYDICKLLKNGANV  
HSKNRDNLTPIDLVKDPKSDLADLLRGEFALLDAKKGEIERVKKLLTEDNVNCRDEYGRNSTPLHLAAG  
YNHLDVVEYLLLENKADVNAKDKGLVPLHNASSYGHVDVASLLIRYNSVINATDRWNFTPLHEAAQKGR  
QVCSLLIIHGADVYLKNQEQIPLDLATADDVIALQDAMMKDIPLTIPPAEKEAKSNIVNKGTLTAAGAS  
LLASELVLGDGVDKNGMVTQRRGGPAGVGDGSDKGFMSYRGGDAPPPWHNVTVKDILTELELGHVLEL  
FEREQITIDILIEMNGDDLQSIGITAFGVRHRLKRIRELVQGNNEEYPVGVTTTKPTQGTQLIELSSDD  
KEFIDTADLMQSTICEHRDDGKAGGVFDSYEILKIERIVNTKVMERYKYRKEVAESNNNCANELMLFHG  
SPFPVYIVHNGFDERHAYIGMGFAGIYFAEHSSKSNQYVYVYIGGGNGCPEHKNRSCYTCRLKLLCRVV  
LGKPVYQYTAVRIAHPGHHSVIGRPSAGGLNYPEYVYVYRGEQAYPEYIITFRIKKPSATDSMSSSSSL  
DMSNNT

### Alignment

|                                   |                                                              |     |
|-----------------------------------|--------------------------------------------------------------|-----|
| XP_019848937.1 [A. queenslandica] |                                                              | 0   |
| NP_651410.1 [D. melanogaster]     |                                                              | 0   |
| XP_047128184.1 [H. vulgaris]      |                                                              | 0   |
| XP_032220531.1 [N. vectensis]     |                                                              | 0   |
| XP_032806710.1 [P. marinus]       |                                                              | 0   |
| XP_019641281.1 [B. belcheri]      |                                                              | 0   |
| XP_014017013.1 [S. salar]         | MAVSRSSSQQQGN-----LLSPF                                      | 19  |
| XP_018099068.1 [X. laevis]        | MAAPSRSSQ---QQVFATAAGQSPPPSASPFLSPSS---RR---AASCLSPPCSP      | 48  |
| NP_989671.2 [G. gallus]           | MAAPPRR---SQ-HHHHHHGPPPPPGPASPPAAASPPSPSLAPAEGL-PAQ          | 58  |
| NP_003738.2 [H. sapiens]          | MAASRRSQNHNNHHHQQLQPAGGASAPPPPPPPLSPGLAAGTTP-ASTASGLAFASP    | 49  |
| XP_024106876.1 [P. abelii]        | MAASRRSQNHNNHHHQQLQPAGGASAPPPPPPPLSPGLAAGTTP-ASTASGLAFASP    | 59  |
| NP_780300.2 [M. musculus]         | MAASRRSQNHNNHHHQQLQPAGGASAPPPPPPPLSPGLAAGTTP-ASTAGGLAFASP    | 59  |
| -----MAGR                         |                                                              |     |
| XP_019848937.1 [A. queenslandica] |                                                              | 0   |
| NP_651410.1 [D. melanogaster]     |                                                              | 0   |
| XP_047128184.1 [H. vulgaris]      |                                                              | 0   |
| XP_032220531.1 [N. vectensis]     |                                                              | 0   |
| XP_032806710.1 [P. marinus]       |                                                              | 0   |
| XP_019641281.1 [B. belcheri]      |                                                              | 0   |
| XP_014017013.1 [S. salar]         | -----MAARRAHLASPSSSSSLSPSGSLDTTAAAAAAAATTTAAAAAAT            | 46  |
| XP_018099068.1 [X. laevis]        | RNGSLSVSPFGSPSLNL-----VTATLVFPDGERGCSTG-                     | 53  |
| NP_989671.2 [G. gallus]           | ETNALSSLREGPDSEPEGEAASQGTFTRFLSPFPPEGAANIL-                  | 90  |
| NP_003738.2 [H. sapiens]          | RHS-----LAGPEGA--FPDAERFFAPE-                                | 70  |
| XP_024106876.1 [P. abelii]        | RHG-----LALPEGDGSRDPDFRPSPDPVDGTSCCSTTSITCTVAAPVPVAVST       | 110 |
| NP_780300.2 [M. musculus]         | RHG-----LALPEGDGSRDPDFRPSPDPVDGTSCCSTTSITCTVTAAPVPVAVST      | 110 |
|                                   | RHG-----LALPEGDGSRDPDFRPSPDPVDGVACTVA--APAAPFAA---           | 100 |
| -----MANSRS                       |                                                              |     |
| XP_019848937.1 [A. queenslandica] |                                                              | 0   |
| NP_651410.1 [D. melanogaster]     |                                                              | 0   |
| XP_047128184.1 [H. vulgaris]      |                                                              | 0   |
| XP_032220531.1 [N. vectensis]     |                                                              | 0   |
| XP_032806710.1 [P. marinus]       |                                                              | 0   |
| XP_019641281.1 [B. belcheri]      |                                                              | 0   |
| XP_014017013.1 [S. salar]         | -----MENPL--ASFDLQTALSLSGGSTPTTTTSGGGSSSVSPGS                | 93  |
| XP_018099068.1 [X. laevis]        | SPTSLSLPAPAFPSSSGSSSS---SS---PSSNSLCGTGPSAESPVIGVSGSVG       | 140 |
| NP_989671.2 [G. gallus]           | -CSEGAAFPFGPGSSSGSSSGSSSSSS---SSTS SVSPSPAEPESV-             | 143 |
| NP_003738.2 [H. sapiens]          | SSAAGVAPNPAGS---GSNNPSSSSSSPTSSSSSSPSSPSSGLAESPEAAGVSSTAPLGP | 167 |
| XP_024106876.1 [P. abelii]        | SSAAGVAPNPAGS---GSNNPSSSSSSPTSSSSSSPSSPSSGLAESPEAAGVSSTAPLGP | 167 |
| NP_780300.2 [M. musculus]         | SAAGVAPTTPAGGGGGNNASSASPTSSSSSSPSSPSSGLAESPEAAGVGSTATLGA     | 160 |
| -----MQ-CARMAKSKLA                |                                                              |     |
| XP_019848937.1 [A. queenslandica] |                                                              | 0   |
| NP_651410.1 [D. melanogaster]     |                                                              | 0   |
| XP_047128184.1 [H. vulgaris]      |                                                              | 0   |
| XP_032220531.1 [N. vectensis]     |                                                              | 0   |
| XP_032806710.1 [P. marinus]       |                                                              | 0   |
| XP_019641281.1 [B. belcheri]      |                                                              | 0   |
| XP_014017013.1 [S. salar]         | -----TTAAAMT-----TTAAVSATSSSFTT-----AAAAA VAAAAATGS          | 12  |
| XP_018099068.1 [X. laevis]        | -----MENPL--ASFDLQTALSLSGGSTPTTTTSGGGSSSVSPGS                | 93  |
| NP_989671.2 [G. gallus]           | SPTSLSLPAPAFPSSSGSSSS---SS---PSSNSLCGTGPSAESPVIGVSGSVG       | 140 |
| NP_003738.2 [H. sapiens]          | SSAAGVAPNPAGS---GSNNPSSSSSSPTSSSSSSPSSPSSGLAESPEAAGVSSTAPLGP | 167 |
| XP_024106876.1 [P. abelii]        | SSAAGVAPNPAGS---GSNNPSSSSSSPTSSSSSSPSSPSSGLAESPEAAGVSSTAPLGP | 167 |
| NP_780300.2 [M. musculus]         | SAAGVAPTTPAGGGGGNNASSASPTSSSSSSPSSPSSGLAESPEAAGVGSTATLGA     | 160 |
| -----MALGRPNRAMPSSRN-----S----    |                                                              |     |
| XP_019848937.1 [A. queenslandica] |                                                              | 0   |
| NP_651410.1 [D. melanogaster]     |                                                              | 0   |
| XP_047128184.1 [H. vulgaris]      |                                                              | 0   |
| XP_032220531.1 [N. vectensis]     |                                                              | 0   |
| XP_032806710.1 [P. marinus]       |                                                              | 0   |
| XP_019641281.1 [B. belcheri]      |                                                              | 0   |
| XP_014017013.1 [S. salar]         | -----TTAAAMT-----TTAAVSATSSSFTT-----AAAAA VAAAAATGS          | 12  |
| XP_018099068.1 [X. laevis]        | -----MENPL--ASFDLQTALSLSGGSTPTTTTSGGGSSSVSPGS                | 93  |
| NP_989671.2 [G. gallus]           | SPTSLSLPAPAFPSSSGSSSS---SS---PSSNSLCGTGPSAESPVIGVSGSVG       | 140 |
| NP_003738.2 [H. sapiens]          | SSAAGVAPNPAGS---GSNNPSSSSSSPTSSSSSSPSSPSSGLAESPEAAGVSSTAPLGP | 167 |
| XP_024106876.1 [P. abelii]        | SSAAGVAPNPAGS---GSNNPSSSSSSPTSSSSSSPSSPSSGLAESPEAAGVSSTAPLGP | 167 |
| NP_780300.2 [M. musculus]         | SAAGVAPTTPAGGGGGNNASSASPTSSSSSSPSSPSSGLAESPEAAGVGSTATLGA     | 160 |
| -----MDTRDHQAIPGDS-----RQ-T       |                                                              |     |
| XP_019848937.1 [A. queenslandica] |                                                              | 0   |
| NP_651410.1 [D. melanogaster]     |                                                              | 0   |
| XP_047128184.1 [H. vulgaris]      |                                                              | 0   |
| XP_032220531.1 [N. vectensis]     |                                                              | 0   |
| XP_032806710.1 [P. marinus]       |                                                              | 0   |
| XP_019641281.1 [B. belcheri]      |                                                              | 0   |
| XP_014017013.1 [S. salar]         | -----MENPL--ASFDLQTALSLSGGSTPTTTTSGGGSSSVSPGS                | 93  |
| XP_018099068.1 [X. laevis]        | SPTSLSLPAPAFPSSSGSSSS---SS---PSSNSLCGTGPSAESPVIGVSGSVG       | 140 |
| NP_989671.2 [G. gallus]           | -CSEGAAFPFGPGSSSGSSSGSSSSSS---SSTS SVSPSPAEPESV-             | 143 |
| NP_003738.2 [H. sapiens]          | SSAAGVAPNPAGS---GSNNPSSSSSSPTSSSSSSPSSPSSGLAESPEAAGVSSTAPLGP | 167 |
| XP_024106876.1 [P. abelii]        | SSAAGVAPNPAGS---GSNNPSSSSSSPTSSSSSSPSSPSSGLAESPEAAGVSSTAPLGP | 167 |
| NP_780300.2 [M. musculus]         | SAAGVAPTTPAGGGGGNNASSASPTSSSSSSPSSPSSGLAESPEAAGVGSTATLGA     | 160 |
| -----MANSRS                       |                                                              |     |
| XP_019848937.1 [A. queenslandica] |                                                              | 0   |
| NP_651410.1 [D. melanogaster]     |                                                              | 0   |
| XP_047128184.1 [H. vulgaris]      |                                                              | 0   |
| XP_032220531.1 [N. vectensis]     |                                                              | 0   |
| XP_032806710.                     |                                                              |     |

```

*****: : : * : ** ***** : : :
XP_019848937.1[A.queenslandica] NCHGKTAFNLPASEFEKRLDSEYRGYQLAAAEDEGGIIILKKLLSSQLLKQHHQTLD
XP_651410.1[D.melanogaster] NCHSKSAIDAAPTRELRIIAFEYKHGLCDLCKRCKDVSRAKKIVCAEIVNVPHTYGD
XP_047128184.1[H.vulgaris] NCHSKTADIVAPVQLDKLIDYFEGHYTHLEAVKSGSDLSKIKRIIAPDLVNVFPLTLN
XP_032220531.1[N.vectensis] XP_032220531.1[N.vectensis] NCHSKTADIVAPTELQKLLSEFQKGLDGAARQCDTAKIKLITITETINQPHLTD
XP_032806710.1[P.marinus] NCHSKSAIDLAPTSELKRLYFVFGHSLQQAAREADLVTRVKHGLGDIINFKPHQTHE
XP_01641281.1[B.belcheri] NCHSKSAIDVASTPEKQLSEYFKGHCLLDGARQTDMAKVKVHGLDQIVNFKPHYTHD
XP_014017013.1[S.salar] NCHSKGSVDMAPPTPELKRLLTFEFGHSLQQAAREADMAKVKVHTLALIEINFKPHQTHE
XP_01899068.1[L.laevis] NCHGKSADVMAPTPELKRSEYFKGHSLQQAAREADLAKVKTTLALIEINFKPQOSHE
XP_989671.2[G.gallus] NCHGKSADVMAPTPELKRLLTFEFGHSLQQAAREADLAKVKTTLALIEINFKPQOSHE
XP_003738.2[H.sapiens] NCHGKSADVMAPTPELKRLLTFEFGHSLQQAAREADLAKVKTTLALIEINFKPQOSHE
XP_024106876.1[P.abellii] NCHGKSADVMAPTPELKRLLTFEFGHSLQQAAREADLAKVKTTLALIEINFKPQOSHE
XP_780300.2[M.musculus] NCHGKSADVMAPTPELKRLLTFEFGHSLQQAAREADLAKVKTTLALIEINFKPQOSHE

```

|                                                                |     |
|----------------------------------------------------------------|-----|
| NCHGKTAFNLAPEEPRFGRDSEYRGYQLAAEDCGGILLKKLLSQQLFQHHQTJDT        | 371 |
| NCHSKSADIDVAPTELRRERIAFEYGHGQLDAACDKRCKIVAAQNVFVPHYTDG         | 372 |
| NCHSKTADIDVAPQELKMLLYVRGHQYLEAGKCTSDLSKIKRIAPDLVNFVHFLTNS      | 373 |
| NCHSKSADIDAAPTELQEKLSLEFGHGYLEAAKVTDAKCTKKRILITFNFQHFLTLD      | 374 |
| NCHSKSADIDVAPTELSEIKRLVYFPGKHSLLQAAREADVTRVKKHQLDILINFKHQPTHT  | 375 |
| NCHSKSADIDVASTPELQEKLSYFPGKCHLDGGRQTDMAKYVKKHQLDILINFKHQPTHT   | 376 |
| NCHSKGSAVDMAPTPELKERLITYFPGKHSLLQAAREADMAKVKTTLALELISFKHQPTNET | 377 |
| NCHSKGSAVDMAPTPELKERLSYFPGKHSLLQAAREADLAKVKTTLALELINFKQPSHET   | 378 |
| NCHSKGSAVDMAPTPELKERLITYFPGKHSLLQAAREADMAKVKTTLALELINFKQPSHET  | 379 |
| NCHSKGSAVDMAPTPELKERLITYFPGKHSLLQAAREADLAKVKTTLALELINFKQPSHET  | 380 |
| NCHSKGSAVDMAPTPELKERLITYFPGKHSLLQAAREADLAKVKTTLALELINFKQPSHET  | 381 |
| NCHSKGSAVDMAPTPELKERLITYFPGKHSLLQAAREADLAKVKTTLALELINFKQPSHET  | 382 |
| NCHSKGSAVDMAPTPELKERLITYFPGKHSLLQAAREADLAKVKTTLALELINFKQPSHET  | 383 |
| NCHSKGSAVDMAPTPELKERLITYFPGKHSLLQAAREADLAKVKTTLALELINFKQPSHET  | 384 |
| NCHSKGSAVDMAPTPELKERLITYFPGKHSLLQAAREADLAKVKTTLALELINFKQPSHET  | 385 |
| NCHSKGSAVDMAPTPELKERLITYFPGKHSLLQAAREADLAKVKTTLALELINFKQPSHET  | 386 |
| NCHSKGSAVDMAPTPELKERLITYFPGKHSLLQAAREADLAKVKTTLALELINFKQPSHET  | 387 |
| NCHSKGSAVDMAPTPELKERLITYFPGKHSLLQAAREADLAKVKTTLALELINFKQPSHET  | 388 |
| NCHSKGSAVDMAPTPELKERLITYFPGKHSLLQAAREADLAKVKTTLALELINFKQPSHET  | 389 |
| NCHSKGSAVDMAPTPELKERLITYFPGKHSLLQAAREADLAKVKTTLALELINFKQPSHET  | 390 |
| NCHSKGSAVDMAPTPELKERLITYFPGKHSLLQAAREADLAKVKTTLALELINFKQPSHET  | 391 |
| NCHSKGSAVDMAPTPELKERLITYFPGKHSLLQAAREADLAKVKTTLALELINFKQPSHET  | 392 |
| NCHSKGSAVDMAPTPELKERLITYFPGKHSLLQAAREADLAKVKTTLALELINFKQPSHET  | 393 |
| NCHSKGSAVDMAPTPELKERLITYFPGKHSLLQAAREADLAKVKTTLALELINFKQPSHET  | 394 |
| NCHSKGSAVDMAPTPELKERLITYFPGKHSLLQAAREADLAKVKTTLALELINFKQPSHET  | 395 |
| NCHSKGSAVDMAPTPELKERLITYFPGKHSLLQAAREADLAKVKTTLALELINFKQPSHET  | 396 |
| NCHSKGSAVDMAPTPELKERLITYFPGKHSLLQAAREADLAKVKTTLALELINFKQPSHET  | 397 |
| NCHSKGSAVDMAPTPELKERLITYFPGKHSLLQAAREADLAKVKTTLALELINFKQPSHET  | 398 |
| NCHSKGSAVDMAPTPELKERLITYFPGKHSLLQAAREADLAKVKTTLALELINFKQPSHET  | 399 |
| NCHSKGSAVDMAPTPELKERLITYFPGKHSLLQAAREADLAKVKTTLALELINFKQPSHET  | 400 |

XP\_019489337.1[*A.queenslandica*] GHVDAIALLIRYNSVNTDKRWFTLPLEAAAGKRGQTQVCSLLITHGADVLYNKGQEQIPL  
NP\_651410.1[*D.melanogaster*] GHVDAIALLIKRYTVMNATDKRWFTLPLEAAAGKRGQTQVCSLLIHAAGDAPVMYNNQEQGTPL  
XP\_047126184.1[*H.vulgaris*] GHVDAIALLIKRYADNVNATDRLWFTLPLEAAAGKRGQTQVCSLLITHGANAMNNKQEQGTPL  
XP\_032205231.1[*N.vectensis*] GHVDAIALLIKYQNTDVMNATDRLWFTLPLEAAAGKRGQTQVCSLLIHAAGDAPFSMNKQEQGSP  
XP\_032806710.1[*P.marinus*] GHVDAIALLIKYSCAVNATDKRWFTLPLEAAAGKRGQTQVCSLLIHAAGDAPFSMNKQEQGTPL  
XP\_019641281.1[*B.belcheri*] GHVEIAQLLIKYGTCVNATDKRWFTLPLEAAAGKRGQTQVCSLLIHAAGDAPTMKNQEQGTPL  
XP\_014017013.1[*S.salar*] GHVDAIALLIKFYNTCVNATDKWFTLPLEAAAGKRGQTQVCSLLIHAAGDAPTMKNQEQGTPL  
XP\_018099068.1[*X.laenig*] GHVDAIALLIKYKTCVNATDKWFTLPLEAAAGKRGQTQVCSLLIHAAGDAPTMKNQEQGTPL  
NP\_989671.2[*G.gallus*] GHVDAIALLIKYNTCVNATDKWFTLPLEAAAGKRGQTQVCSLLIHAAGDAPTMKNQEQGTPL  
NP\_003738.2[*H.sapiens*] GHVDAIALLIKYNTCVNATDKWFTLPLEAAAGKRGQTQVCSLLIHAAGDAPTMKNQEQGTPL  
XP\_024106876.1[*P.abellii*] GHVDAIALLIKYNTCVNATDKWFTLPLEAAAGKRGQTQVCSLLIHAAGDAPTMKNQEQGTPL  
NP\_780300.2[*M.musculus*] GHVDAIALLIKYNTCVNATDKWFTLPLEAAAGKRGQTQVCSLLIHAAGDAPTMKNQEQGTPL

|                                   |                                                                |      |
|-----------------------------------|----------------------------------------------------------------|------|
| XP_019848937.1 [A. queenslandica] | DLATADDVALLQDAMMKPLIT-IPPAEKAKSN-----I-----V                   | 830  |
| NP_651410.1 [D. melanogaster]     | ELATADDVKLLQDAMATLSLQALASASTQSLTSS-----SPADP                   | 816  |
| XP_047128184.1 [H. vulgaris]      | DLATADDVQVLLQDSMSVSKSEMQITSNICS-----                           | 821  |
| XP_032220531.1 [N. vectensis]     | DLATAEDVKLLQDAMDLSQTQTSVSTAPVAKVPA-----PV                      | 824  |
| XP_032806710.1 [P. marinus]       | DLATADDVALLIDAMPPEALPVTHKPFSSITPITSAATAAATAALAGPTPALASLPSPV    | 916  |
| XP_019641281.1 [B. belcheri]      | DLATAEDVRLLDVAMPQPSQLPAATTAAT-VKAA-                            | 812  |
| XP_014017013.1 [S. salar]         | DLATADDIRALLMDAMPPEALPSCFKPQATVVSAG-----                       | 900  |
| XP_018099068.1 [X. laevis]        | DLATADDIRALLIDAMPPEALPSCFKPQATVVA-----                         | 945  |
| NP_989671.2 [G. gallus]           | DLATADDIRALLIDAMPPEALPTCFKPQATVVA-----                         | 913  |
| NP_003738.2 [H. sapiens]          | DLATADDIRALLIDAMPPEALPTCFKPQATVVA-----                         | 974  |
| XP_024106876.1 [P. abelii]        | DLATADDIRALLIDAMPPEALPTCFKPQATVVA-----                         | 967  |
| NP_780300.2 [M. musculus]         | DLATADDIRALLIDAMPPEALPTCFKPQATVVA-----                         | 974  |
|                                   | *****: ** *                                                    |      |
| XP_019848937.1 [A. queenslandica] | NKGLTAAGA-----SLLAS-----ELVLGDGVDDKNMGVT-----                  | 860  |
| NP_651410.1 [D. melanogaster]     | ATAAAAPGTSSSSSSSALSPSTTIVLTPGAS-----MILSVFVPLPLSSST            | 863  |
| XP_047128184.1 [H. vulgaris]      | -----LKSIPNSQVLPISNDLSQLEPQE-----GLTKPSTANQN                   | 856  |
| XP_032220531.1 [N. vectensis]     | TATA-----GAATPATGTISGMAPLSQAN-----S                            | 849  |
| XP_032806710.1 [P. marinus]       | PSGASASGA-----GVPLLASPSSTPASLSAASMDSLTGACCVAPSPVAGAIAGAGAAGD   | 97   |
| XP_019641281.1 [B. belcheri]      | -----PTSSPSTPTSSPTGVLSTASSMDHLVAGVG-----GA-----                | 84   |
| XP_014017013.1 [S. salar]         | -----VISPASTPSCLSAASDINLGLPMAELGAA-----GTS-----                | 934  |
| XP_018099068.1 [X. laevis]        | -----S-----IISPSTPSCLSAASDINLGLPMAELAVG-----GVS-----           | 979  |
| NP_989671.2 [G. gallus]           | -----S-----LISPASTPSCLSAASDINLGLPMAELAVG-----GAS-----          | 947  |
| NP_003738.2 [H. sapiens]          | -----S-----LISPASTPSCLSAASDINLGLPMAELAVG-----GAS-----          | 1008 |
| XP_024106876.1 [P. abelii]        | -----S-----LISPASTPSCLSAASDINLGLPMAELAVG-----GAS-----          | 1008 |
| NP_780300.2 [M. musculus]         | -----S-----LISPASTPSCLSAASDINLGLPMAELAVG-----GAS-----          | 1001 |
|                                   | *****: ** *                                                    |      |
| XP_019848937.1 [A. queenslandica] | -QRRGGPAGVGDGSDKGFMS-----YRGGDAPFPWHNVTVRIGLTELGLHVLVEFR       | 913  |
| NP_651410.1 [D. melanogaster]     | -RISPAQGAENAGEGSSS-----D-----DLDPADPTFNVGSLFSSQQHHLIELFER      | 912  |
| XP_047128184.1 [H. vulgaris]      | -LLSEP-CNSDCLQ-----TKRLDRAGQTNPLDIDGTFTSLAQLEPHETFSR           | 905  |
| XP_032220531.1 [N. vectensis]     | SLLANSAPHGDDGAPGASVNRSEVAGAVRSISAVHPLGLDVVDQFLDGLNNHLKEIFER    | 909  |
| XP_032806710.1 [P. marinus]       | TLLGACGVSAADGATGPA-----DKDPSRADPELGLDMMNMFRLKGLDHLRDLFEF       | 1028 |
| XP_019641281.1 [B. belcheri]      | -----QQGDGAADR-----SAVEGE-SLDMTISSPFLQGLDHLIDFNK               | 884  |
| XP_014017013.1 [S. salar]         | -----GVADGAGTS-----DRKEGELVLMDDMINQFPLKSLGLEHLRDLIFET          | 975  |
| XP_018099068.1 [X. laevis]        | -----NAGDGAAGT-----ERKEGVELVDININQFPLKSLGLEHLRDLIFET           | 1020 |
| NP_989671.2 [G. gallus]           | -----NTGDGAAGT-----ERKEGEVGLDDMINQFPLKSLGLEHLRDLIFET           | 988  |
| NP_003738.2 [H. sapiens]          | -----NAGDGAAGT-----ERKEGEVGLDDMINQFPLKSLGLEHLRDLIFET           | 1049 |
| XP_024106876.1 [P. abelii]        | -----NAGDGAAGT-----ERKEGELGLDDMINQFPLKSLGLEHLRDLIFET           | 1049 |
| NP_780300.2 [M. musculus]         | -----NAGDGAAGA-----ERKEGEVGLDDMINQFPLKSLGLEHLRDLIFET           | 1042 |
|                                   | : * : : : : * : : : *                                          |      |
| XP_019848937.1 [A. queenslandica] | EQITLDILAEHGMDDLQSGVITAFVGRHRLIKGIRIELVQGNNE-----YPVGVTTTKP    | 967  |
| NP_651410.1 [D. melanogaster]     | EQITLDILAEHGMDDLQSGVITAFVGRHRLIKGIRIELVQGNNTGIGN-----NV        | 959  |
| XP_047128184.1 [H. vulgaris]      | EQITMDVLVEMDGLQKEIGIVAYGHRHRLIKGVERLQAGACGTG--G--EPPFLSNINAS   | 962  |
| XP_032806710.1 [P. marinus]       | EQSGSVLVDMGHGHKELKEIGINAYGHRHRLIKGVERLQAGACGTG--G--EPPFLSNINAS | 961  |
| XP_032806710.1 [P. marinus]       | EQSGSVLVDMGHGHKELKEIGINAYGHRHRLIKGVERLQAGACGTG--G--EPPFLSNINAS | 1087 |
| XP_019641281.1 [B. belcheri]      | EQITLDILAEHGMDDLQSGVITAFVGRHRLIKGIRIELVQGNNE-----YPVGVTTTKP    | 938  |
| XP_014017013.1 [S. salar]         | EQITLDILAEHGMDDLQSGVITAFVGRHRLIKGIRIELVQGNNE-----YPVGVTTTKP    | 1028 |
| XP_018099068.1 [X. laevis]        | EQITLDILAEHGMDDLQSGVITAFVGRHRLIKGIRIELVQGNNE-----YPVGVTTTKP    | 1073 |
| NP_989671.2 [G. gallus]           | EQITLDILAEHGMDDLQSGVITAFVGRHRLIKGIRIELVQGNNE-----YPVGVTTTKP    | 1041 |
| NP_003738.2 [H. sapiens]          | EQITLDILAEHGMDDLQSGVITAFVGRHRLIKGIRIELVQGNNE-----YPVGVTTTKP    | 1102 |
| XP_024106876.1 [P. abelii]        | EQITLDILAEHGMDDLQSGVITAFVGRHRLIKGIRIELVQGNNE-----YPVGVTTTKP    | 1102 |
| NP_780300.2 [M. musculus]         | EQITLDILAEHGMDDLQSGVITAFVGRHRLIKGIRIELVQGNNE-----YPVGVTTTKP    | 1095 |
|                                   | ***: * : : : * : : : * : : : *                                 |      |
| XP_019848937.1 [A. queenslandica] | TQGTQLIELSSDDKEFIDTADLMQSTICEHRDNGKAGGVDSVEILKIRIVNMTKWERY     | 1027 |
| NP_651410.1 [D. melanogaster]     | NLCTLLVDLLPDKDEFFVAEEEMQATIREHRDNGKAGGVYFTRNIRIVQVKNMKLREY     | 1019 |
| XP_047128184.1 [H. vulgaris]      | GPNTLLQELSSDDEKQSVAAEEMQSTVEHRDNGKAGGVFTRSYSLKIRIVNMTKWERY     | 1022 |
| XP_032220531.1 [N. vectensis]     | VQGSVQLSVMQDKFASVDEEMQSTVEHRDNGKAGGVFTRSYSLKIRIVNMTKWERY       | 1022 |
| XP_032806710.1 [P. marinus]       | QGTLLDILAEHGMDDLQSGVITAFVGRHRLIKGIRIELVQGNNE-----YPVGVTTTKP    | 1147 |
| XP_019641281.1 [B. belcheri]      | SHTGILLDILAEHGMDDLQSGVITAFVGRHRLIKGIRIELVQGNNE-----YPVGVTTTKP  | 998  |
| XP_014017013.1 [S. salar]         | NQGTLLDILAEHGMDDLQSGVITAFVGRHRLIKGIRIELVQGNNE-----YPVGVTTTKP   | 1088 |
| XP_018099068.1 [X. laevis]        | SGQTVLLDILAEHGMDDLQSGVITAFVGRHRLIKGIRIELVQGNNE-----YPVGVTTTKP  | 1133 |
| NP_989671.2 [G. gallus]           | SGQTVLLDILAEHGMDDLQSGVITAFVGRHRLIKGIRIELVQGNNE-----YPVGVTTTKP  | 1101 |
| NP_003738.2 [H. sapiens]          | SGQTVLLDILAEHGMDDLQSGVITAFVGRHRLIKGIRIELVQGNNE-----YPVGVTTTKP  | 1162 |
| XP                                |                                                                |      |

## Percent identity matrix:

```
#
#
# Percent Identity Matrix - created by Clustal2.1
#
#
1: XP_019848937.1[A.queenslandica] 100.00 56.61 56.26 60.24 58.20 58.78 57.98 57.87 58.99 58.15 58.24 58.33
2: NP_651410.1[D.melanogaster] 56.61 100.00 60.37 64.62 65.53 68.43 66.78 66.17 67.32 66.70 66.78 66.87
3: XP_047128184.1[H.vulgaris] 56.26 60.37 100.00 68.01 64.65 65.41 64.30 63.79 65.21 64.59 64.68 64.77
4: XP_032220531.1[N.vectensis] 60.24 64.62 68.01 100.00 70.41 71.77 71.65 70.27 71.72 71.42 71.42 71.50
5: XP_032806710.1[P.marinus] 58.20 65.53 64.65 70.41 100.00 79.64 81.58 80.45 83.01 80.58 80.50 81.23
6: XP_019641281.1[B.belcheri] 58.78 68.43 65.41 71.77 79.64 100.00 78.66 79.04 80.28 79.44 79.53 79.53
7: XP_014017013.1[S.salar] 57.98 66.78 64.30 71.65 81.58 78.66 100.00 86.51 87.95 86.97 87.05 86.47
8: XP_018099068.1[X.laevis] 57.87 66.17 63.79 70.27 80.45 79.04 86.51 100.00 90.73 89.50 89.35 88.67
9: NP_989671.2[G.gallus] 58.99 67.32 65.21 71.72 83.01 80.28 87.95 90.73 100.00 93.42 93.42 93.04
10: NP_003738.2[H.sapiens] 58.15 66.70 64.59 71.42 80.58 79.44 86.97 89.50 93.42 100.00 99.70 97.72
11: XP_024106876.1[P.abelii] 58.24 66.78 64.68 71.42 80.50 79.53 87.05 89.35 93.42 99.70 100.00 97.80
12: NP_780300.2[M.musculus] 58.33 66.87 64.77 71.50 81.23 79.53 86.47 88.67 93.04 97.72 97.80 100.00
```
