# Supplementary material for: An Evolutionary Perspective on the Origin, Conservation and Binding Partner Acquisition of Tankyrases
Source: MDPI journal article supplement (doi:10.3390/biom12111688), 2022-11-15
Supplement: s1 [file s1]

Homo sapiens:

Pongo abelii:

Mus musculus:

[illegible]

AQVAHADQQLRDLGKFQVATDALKSREPQVKPQLDLSIDSLDLSLEEGLPCSVASKLPR**TQPDGTS**VPGE  
PASPSISQRLPPKVESLESLEYFTPTPARGQAPLETSLDLSGDAFPDSGRKTRSARRRTTQIINITMTKKLE  
LEEPDSANSSSYSTQSPASPAQANLRATSSSTQSLARLGSDDGNSALLSLPGYRPTTRSSARRSQARMS  
APQGRNSFYMGTCQDEPEQLDDWNRIAEQLQQRNVCPPHLKTCTYPLESRPTLSLATITDEEMKTGDPRET  
LRRASMQPQAIAGVGVIITTRQQRKVSSETHQGPPTPESKKATSCFPFRPMTPRDRHEGRKQSTADTKK  
AAPVLKQADRQSMAFSILNTPKKLGNSLLRRGASKKTPAKVSPNPRSGTRRSPRIATTTGTATVATTP  
RAKGKVKH

**Gallus gallus:**

>CBN80053.1 nuclear mitotic apparatus protein [Gallus gallus]  
MPLHTTRATALLAWNSTKACAEPLGDLSQLQDCRVFIQIINKIHRTTEGESVLEQSLAERAAFICGFLQ  
KLCKHKSATENLVS AQKLLGEGELELAKVAVLLLYHSSMSKSPDWNNEFDYQIQVELATILKFLVDHEE  
SLSENLEVFLORRAPLSSPGTSSSSSEERSPGLSHFPQVRFLELQKIASSSSSMNMNLPGTSPASVPGDVLQ  
TPQFQLRRLKKQLAITERENRDELEMELAENRKLITEKEAQITMMQHRIDRIALLNLEKQAADQLEPREMEE  
LRERNESLLVRLHEALKQCQDLKTEKGQMDRKINQLSEENGDSL FKLREIASHLVQLQDALNELSEEHNS  
ALMQSQAQAQLEGE LRAVLQEKKCLEEKVEITLQGKISLLEDQLVKLGD CSTQEKGEVMGDVLKLEELQ  
EVSSITTTKGIELQASVLRLEEEKSQRDAALQAERNHFEMEKLQLGTHISNLQSSVSELHLAKEKLEQELR  
AQEAHLTAQADALTAEVGKLSGFLQQQKEAAELRMQAEQERAQAEELRHRRDMSQEALSELSRVRVQLG  
ASLKHSSEELVVRVTQAEAGKARQLGAEHKAVQERDAALQQQLQHLQQAKEKQLAALSSQLQSELAASKAS  
SMEMQKEKAELNQVQELQARVLELSAQCCQSSAQGASETLRAQLRELEGLKDKDSQOKLADKVKAKEN  
TRQERLLPLEESVRNTEGILEDEKRRAAESLEGNLARIAELEAEKQQLVQRGEQALQQHSEELARRQAL  
ETRLQQVAEERREETAALQRQLAEVAKGEEGGERGLKRLQELSRHHGQAQRQLQAEQERVAELEARVAR  
MASEQQQLAALQDLARAKEKEGKEQEKLASAERVGKLEAEVRKASEALEAVSKELSEERLKFKELEAV  
ATQEAASEVARLSAALAEAAEHQGE LARKEEAAKRLQKELEDAKADCAAEKARKKVELEVQLQNSINEQRV  
ERSAHQQLARSLLEIEKEGELEDELRLKNVSRGEELRDQLQTVSKLKGELASVEAVKERASKMDSLQG  
FLAARSRDAEMDSIKAVYAKEASLKNLEEKIRHREQESGSSQDLIQEKLKEAQMLSVEVERLEQKCRFQ  
QDTIAGLEKAVAEESQQAQAELEALQREAVRHRETAABLQRLLDASKSAQALQDGTVESLRKELQOKSKE  
LAQSKMAVAAAEKEVASLRAAAEKGHLEEGWKELSQCTQELERNKSLGSLSEHVSILIHQLTEKKEG  
SKELKRLIMAESEKSKLEERLVLQTEMATAASRAAERCSLMKVEVQRCQEEMEKQMTIEALKRDRHC  
QSEREELRQEVKVCQDKFFQKEQLLSSILQQLGSAQAALAGEVVP LKHLCCQLQAERASLESKHREDLEQ  
RAKATTALQAELARARVEVAELPALRDRAAEQERALQRLQKETASSERLAAQAANSRLAEENRALSES  
VSRGQQLRDAELQAREKHRTRELECVRLAEAKAMASSRQEAEEAARKLEAMSNKYENTKVKVLEERQKFO  
EEQKLMQAVEQLEVFQKEQAQKVEELNKKLVQHEKATR SQQVRKVLEGE LQSEATRQOEERVALEELQ  
AQKEQAAEHYKAQMEKAKTHYDAKQONQDLAEKLKAMEQLQKENAELRTESERLAKELQQSVLQAEAE  
LSCRELSGGVRSLETQLEFADQQLRELGKFPAPKATLKEPESFRQNPSDLTSDLSLSDGEGPLNSTRK  
**ATRRHSGDGA**APPGTTEPRASQRLPRKVESLESLEYFTPIASRTQPKLESSAGSLADVLSLESGRTRSGRRR  
TTQITINITMTKKTETTEEPGGADASFSSILSEQPKAAPARARLRSARSLASFPSQDLSLKLDTSSPQEP  
SGHAALLSLPGYRPATRSSLRRSQAGSSSSLGRSSIYLGTQDEPEQLDDWNRIAEQLQQRNACPPHLKT  
CYPLESRPDSVLGTTITDEEMKTGDPETTLRRASMQPQIAEGAATRRGTLGGGWAHGGITTRQQRKRLSD  
ESHQGDPTPESKKPVSCFPRPQTPRERRSSHLRRSEEQAPSQKPERRQSMAFSILNTPKKLGNSLLRRA  
ANRKTTPKNSPRGTARRSPRIASTKSPKGAGRRALKDTKF

**Xenopus laevis:**

>XP\_018103294.2 nuclear mitotic apparatus protein 1 isoform X3 [Xenopus laevis]  
MALHSQKMEALICWNSLKVDEPVERFSQLQDILNLLKVVVGLSGNLEETTSVLQONPEQRINFLQSLQ  
KYCRPGSSAEMLVQWQKILQGENLELEFSKVIIVLLFPYYS TMSKNPKKSEDPDHKTQTELASILRFLVDM  
EESLCLDDKLINFLQRKARFPSSGDDASGSDAMS PYSMHRRKTEVRFLELHRVASSTIKSLPADAPSS  
PMIEVLVHTPQFQMRRLKKQLSEVRECRDELEVALQNHKHLAEKEAQISLQQQIEHLIRLENQAELEQ  
PKELEELREKNESLMMRLRDTLKCQDMKTDKKQLERKNDQWAEENGELTYKVRDLNRLAQQLAEALYET  
TEEHERSLSNMQQKQNLSELSGAVGEKKYLEEHDILQGGKISMLEDQLKMGEREVEQETGDCMGDILK  
LDLDAQEVAHVHSTQCLSLKEQIRQLEEEKSIAEVEMEAQRSRSESEKAQLQEIVTNLQTSLEITTFQKER  
LDNEARAQQEHLMCQMTTKLLEISKIKSSLMHKDELKDIIHHKVEEERSEKNQLLENLKMLEESEKKDRQ  
ELIHQVEHLDSSSLKVSSEGNLVGITQQLSESKTKEADYLR EEQQKICERDSSSLTLENEYKCKKDEEFIALN  
GTLR TMEQDHQTSLSVIEELKREKAELASKVQELDATIIDLIAKQNLDSENDSQSKSHAITVESLKAQL  
SEQESQVKIYQKKLSNLELVSKENSQ LKBEQLLSMEESVRNLSHELDKERMKFAASLDGDSKRKISHLEEM  
KKLTESRDAALRNLDERTAGKKIESQLKNLEEEYHRSNESQHAQLAESCAAIKQREEREDELSKVVDIWK  
KARYGEQQKIAQNSCHMQEQIEELKKT HSDVYQQLGERSKVLMI EAKASETKSSQLEKINQLEGELSA  
ANACIKEREAEKKVL SALHSABEKLKIAYQGESERLSHLETALSNAKQDLDLAKLESD EKKYKA EFEA  
MVVKLKGNSERIASLESELKNSLAVVKERKCESEKLSGEVEHLKRQLDDSSSQHKHEALAQNINIEIKQLI  
DAKEKATSDLAITSEMGALQKQAVDTHKSEFSAQNLENSRSLDPIALKEGEVERINKEAALRQEEIQQQQ  
QTMVKLTEELTALAALKERVALQEKEIKQQVQATKGAEEMEAMLKSIISEKSKRIECLEQDINKQKTDLS  
SIEGQIQSKLSEAGHQHALIADLEKKCKEQKELICEAQNKAAEAKT LASEKASMEKQLKGIQTLENEIQ  
KEBQKCDLQKQLELQAEKQETELRLKKELFHFKVQELQESQKSPDSSNRELSMSLSEVQEQQAIT  
EAKEQABQYQKVIDMKNKEVNSLQAEINILSSKVTSEEVASDFEQRLQETSKSAKLEELKKLHTEVE  
VYSKELVEKNCAVDILRTEAQTFKGEADEQRMADVCLQKQLSSQAE TNNNLQEQEQSQWQKNCAEKQKIC  
SLQONLNSNQSLEEFASLKRYSQETLAERGLMQQKHQEILLSHKNLTERFOAELEKTKEDMAEIVLLKE  
KLNNQELQLHLKQSENSDQSSQISLNQVNSRLLGENQSLSQITSDQDAKKLSTEMSTLKEQHEEEMKTLR  
LQYEKTQREGNEQVQDLSRLRETATSKYDHVKSVKLQDKQTFQEEKQMLLRVELEAAAKEQSEQVQEL  
NQKLQEQEKTLSQSQQKLKQREGETHEEAETHKRVIELESQLEQQTQAVEHYKAQMEKAKVHYDAKKQ  
NSLELSDLELQSHIREQEHLRKENADLKAESQSLKELQHSLLQSKAEABQCNKLN SNRVRSLEAQVEYSDRQ  
LQDLGKFLATDSTKRRDTFCVPRETRSHADVIDSIDLSDFEEDQLLNTSKNGRCNQEPATSSVHASL  
DSPASSQLPKVESLESLEYFTPIPTRAQSKLESSIGSIDGLSDLSKKTRSARRRTTQIINITMTKTKTE  
EREPESANTSFYSLRSAPSYQNLHQONPKRAARQAAISTPALASLP SQESLAKTEHFSSDDSLNNSVLM  
NLPGRYAPARRSSRLSQTGRRSSFY MSTCQDEPD PQEDWTRIAELQARNKTCPPHLKTSYPLESKSLFS  
STLTDEEVKLGDPKETLRRATMLPSQIQDSTTSTRLLTAGSGAEHLKGHGISTRQMKRVSEESHYGPD  
TPEGKATCTCFPRPMTPKDKHDARRLSTMSKASSSHQQVQPTRRQTSAFSIFNTPKKLGSSLLKGLNKK  
KTPPKNSPRGRGTNSSASSTSSKSPHLSLRKSPRRS PRVSTA KSPKASNKVQEEQIQFERKKQQRNK

**Salmo salar:**

>XP\_045580741.1 nuclear mitotic apparatus protein 1 isoform X1 [Salmo salar]  
MHLWLDKEHALLEWVNHNLVDLPVRSINDLQDVLMLKLVYLRKKEEPANSYLDQHVRKLVVSDFLQ  
DCRCSTTERGALISWDNINSGLNLEVELSKVLVLLYHVSVINNHVDNLQLEYKFEVELASMLRFLVDNNS  
LYLSENLEKYLRKKPLPFSFNSDISSTSSSSLFNDDSPVFQRRKMGVSQFLLDQTVASSSVSSPLQDVM  
NTPQFQLKLQRLQRQERDMRDELEKDLTTSATTLTQRESQICQLQHRIEKLLRQAEQEQEPREDELQEL  
HSKNEGRLRTLHEVLKECQALKTNSSQMERKVDSLTEENGTLSAQMREVVARIASAEAEVDRLIEAQDSA  
QGEWSSRHCHLQDELNRATAQKECLSEQMLILQSKISSELEDELSKAKMQEKGVMGPILEWEQLKQELAD  
ATLRLHAECCTIARLKGKEQAAALHAQERASLQAESQRLQVIVTELQEALSALRADREALELASKEERE  
SLTAQLHTLTAEVASLTQTVQOREQEVKALGEEVQEQECMRGELN LAMERQDREAREIEQELTSHVDTMG  
ASLRAREEEVQVREKQLTKQQESALQREV LQEEMAASEKALKELKKQEEAVREAEATLRHQEITTHVTDL  
CSLRQEHQALQELARQEEIE SLEKEAQAAHREKAEVAEALSRLQEEVRSLEGEQMAQLEEAQREKERLL  
LQSTENMETLQTERAAASSLAEAKDLELSILREEVRAEEQLAMQEEYRLRQEEQLAEAAQENENNM  
RERLAGLLDQISLLKVEQCQGNKMEALREEHAAQLEQLRLVKEQVEVQERNEETS AALREKESLSREKE  
SSRLREKESLRGLEEELQSTTSLASQRQEE LTSLKEEVILQEEVEERRAAEALAVEAREALEESVSAL  
QQQLDSAIQDNMGRKCERLEQDLERQGTLVEELRQQEH SARLEATRLRQEISTHLSRLVEVQREKEEL  
RGEVSLHQQRAAVLQSSLEEQEVAMRVLKEQKESIREETTVTKIEALQAQLEVVSSLAAAKDLQLSTLREE  
ATALQELQAKREQEISLQKEV LQEAHREKESLEALREELARQEE LREELILQQQRAQSLQSLSEEQEEA  
KLELTLKEERAREEATQLRQIISTHLSRLVEVQRGKEELREQEAKAREETTVKMEALQAQLEVVSSLAAA  
KDLQSLTAREASSLLCQNTKRAADLKQVLEKTLRELSLSEBHALKEDLAKQQEBELRGEVSLHQQRAA  
ELQLSLEEKQEA LRELKQQLVQQEDSS LQKVLQEAQAALQQAEDALRGEVSLHQQRAE LQHQAAL  
REQEKSTTEATLKM EALKAAKDLQLSALTEKATALQELQAKREQEISLQKEV LQEAHREKESVREALRE  
LARQQELREELILQQQRAQSLQSLSEEQEALKELTLKEERAREEATQLRQISTHLSRLVEVQRGKEE  
LRQEKEKAREETTVKMEALQAQLEVVSSLAAAKDLQLSTLREEASLLCQENTKRAADLKQVLEKIRLES  
LLSEBHALKEDLAKQQEBELRGEVSLHQQRAAE LQHQAALRQE EKSTTEATLKM EALKAAKDLQLSAL  
TEKATALQELQAKREQEISLQKEV LQEAHREKESLEALREELARQEE LREELILQQQRAQSLQSLSEEQ  
QEALKEITLKEERAREEATLKMVALQA AKDLLESLTRQEATQLRQEISTHVS HLEEVKSEGFLPREHTHAL  
QVQLAKQEE NSLQKGLLEQVQATV LQEREAKEALRGEVSLHQQSLSEEQQAVARETLARQKEEGQAAGV  
QKELMEQFV LQQEK EALLTRALQAEQNSQSELEGSMAELRAQAESRESGQRQLDALLLEKERLTEGHQV  
LEMKCSAQRLEAVLLEELALLRQEMGTEWEKQITRLREQLAANTEVVEHYKQTQVEKAKSHSYGKKQQL

VESQEQVTELQRSLEVREHEVNAVTTTEMKLLQKELEKARNKEKSLSSKVNLTLEAQLAFTDRHLREQSQVR  
PERGGIGIEKMRGGRESVYLKVPQSQTHQETSGSDSLDSDSDSLNTTRPLGPDESSPTPLVRSSERVAAK  
RRALGGESLETLYFTPMNNRQINRTSTERRLESSITCLGELALDSARKRPPPTSSARRRRRTQVIVNITMSK  
TTPGRGGAGGSDSNEMFYSLSSVRSHPNITGSTHTARPLISMEVFHTPGKPAVASDQLLSLPGYRRSTVH  
VAAPQSTGQFCVGAENEPDHAADDWLRIAELQARNQSCPLHLKSSYPLESRPSLGPSEFFETDDDLRMGDP  
TETIRRASVMPGQIQESLSSHRLSLHPGQADSTTASRPAYGSHRLSLMPPKPKASSTLANQNTNHLRGSN  
LSLKRSKADQEPDTEVVRMEAKRMATSCFPRPLTPKGGRFSSSNNRQFPSPAERRQSMVFSIDNTPRKAA  
KSGGLQRMGNKIRSSSTRKSPANKISRVPRSGDVKSFPQGGKAQRKSPRTNSSKSPKNFTSARKEPEVLV  
GKPIHLRS

**Petromyzon marinus:**

>XP\_032819484.1 nuclear mitotic apparatus protein 1-like [Petromyzon marinus]  
MVNGRKSAAALISWVMCMCAEKTESLWDLKDLSTYLHIQTIKASVDVKPLLKSSSEYEGKNYIREFLHQFF  
QKNACLTQTVDMDALTVGEHVELELAKLTVAFLLCAAVSTETIQSRMKFLDPDTQIQLHEILKFVMDNEESP  
QLQVNLLELLNNGCVVRSPGVFSIATEETSGRFSSPLSSLPLGHTAGVRFRLQRIASSSMNNLLSSPGS  
PSSPMLSPFFDQPAVEVRRLLKQQLRQEWBQQEKLLEGELSSKSQLLKQSEQEVAEELGRVERLVQLTQTRPP  
SPLPSELAELHEKTQRLSVTVKQCQELKKEINELMEKRLTLQAEENGELSSKVRESCTHAECSRSLFEES  
RSAGQRHAAEVRIRHLEALGEALNSKASLEETVRILQGLKALAEKASLEQRNLPFGVEVMSEVLQM  
BEWHMCQKARERADVGLPPLAKAHTNTTHGHDPTTSREEQSAFPNNVSDNDSSTLIVKDRKYLMPNEST  
MELEGSMVDQYNVTFREELDGHESKQTGVSQDKCEATRARSSALKQNSLEGSSSTSRRREMGARGVEN  
PEFKNNHGRDRTLQGGRTLLQQERVALSKERDILERERAALEKEQMAVIAMGAGNRSILMGHMLTTEASIA  
QQRAILDQEKNNILNEKAALKAMEDEININLRQKSRLLDQEKRRLEQDMMILKQKWNVCVEQDNLVKER  
AIEDQSKASFTKEIITYLKASLEETSGMKARVEQERVLLENEREKIQSITANQNDTASLQREIRIAMQOE  
VDVREQARSALICVVAALEKIEVMPGNEKGSVICALEEGMTTLKAILGLDKGIACEGTHIDMADNGVIAQ  
AVLQQRTEPEAQDNYFISVGRHGMGHRERDRTLQEKDKNTIEETTWGERSLSQRESLVSLDQSDNVLDR  
DQADLETVRVLLKADTKMAVLAPQESAANKVQPMEDQCSPLQDESDSATVRQKAFTPAETVRVLQVQANL  
DHEQIVFRDQLQHEVAVLEQKRTTTLTASLEQERNRLCELEQASMSVMEA DSLKAALQLEEVFVFRATLNR  
ERTVLEEMKFKVQDNTLLQDQEKVKLQRDRDILLEDEKVSIERERVALLDKMKTALAEKMAIERERVILVA  
PLQEERTVLKRELAALHQERAKWTTESERLVQEQALLEQQRVALQQERESLDQHRGNLKVKSEQERAAQS  
ETMYVKQENACRLTEQKTLIHDMAELRTTVDEEEMSWARKRVALDKEKAENERVKSNLDRMAVIKKQK  
SLDQSGMAKFALERTDFLHKAMINENKSNLKTILIEDCIVLEQKQTPGPKVKGILLDESATAKQERDVCK  
AKQAANTLTLQRRAAEALSSSVVERHSVLEQEMYDAVPAKPRQAATQHHETEDTAPPGKVNAAALKALQDLE  
TDTEIQEMSSPGAEDRKRTARSEIRRENVNSSFDQEKHGLEKNALEKGENFREDDIMAAATMEENLDT  
MTQYEVSTDVARSIDIVTETGMAPSNTIFTKEECATLQANVSEIEDHFNTPGVENTRILSKENLEQTPSEDG  
RRHSMVTRSARKRSRYSQETLYFTPLQTRPSLVGGQAPALDWSLNSLEDLVIDSAKKKPRTSSTRRTM  
HVIDITILNKKVESCRDRSVSSASTMRSSTTTAYELRSHGDRPTPVQSSNWSLGFPASSAFVTLDFTTS  
QNSLQLEDMRSGRLSDASRLSPGYRPLPGHPTDGRNLQQLAPPTRRRKGNASYMSCVDEPDPEAEW  
DELEQGLGAHALPRRQPRAALGTACYTEGLQENQPPVNCVKVDFSEKSDTRNDHLRQEELGKRNRQATL  
PHLRSCYPLKVEFTMPGEDLCTAKPEMTARRMFLPALADANAMRKRKSGIGHNTECSPESKKSATMCF  
VVPATPRERPPFRASPRDDHPQRSWPIIRRLQSMRSRKKSPSSKASKP

**Branchiostoma belcheri:**

>XP\_019634543.1 PREDICTED: LOW QUALITY PROTEIN; nuclear mitotic apparatus protein 1-like [Branchiostoma belcheri]  
MFNRGKLDALLGWNVLLGVGTVESLKLRLGNILVRIVLQIDPKLIEAEADPAGRVEVKSFLGFGHVTS  
LGDDTVVRWHLLIQANVAVLAKAAITLVTAFVSDAREGQPMGKMDGRMKAEVVTIKDILLQPNITNBERK  
GRRPDPADILLKEQSMVSPDAICNGGGGRDGLSTHTNRHVSVATPMSGPGVVVTRLFDSPMSFVRNLMSQSP  
QMOKYKIALTKAQQVQQLKIELGTKKHIIIDENDVQLRKMQRALQEKSESEMRLSARLDGLRALQDENDAL  
QARESERKKLQQRCEKLTKALHIEYEVYKTECQELKKQNDRLFEERHGMEDAMKRCQDQMALQVQELQTELH  
CTGQQLQALRDSLKAKDQALQHMQQEKALLEQARHTEERLRETQLELQETMHSSGME SMGESLGSIVEK  
RAQELQELQAYTQENWTKPEEAAKLVESLAAARANAASLEDNIRLSIAEGDKQKDLTEHLDNAVQKYQT  
AEQLSNEEMARHKAIEIQHQQEQEYQALKTDAAMEREALRSKLGAVSSTKTALTEVLTLENERWTFKAKEAYR  
EETLSTEKKLEGAQKQVAQLEEENSVTMAVMQDEKDALERQKLEVSAAAQKCLQINDQVSLQEEKAAY  
VANLEGVYKARVEAEMTLGQKELEQTLHDKTSAESALHNTKEQLTAVSQEKAITSALEQVVKQKEEEAAG  
LDQLVLTAATENSLSAADLESKAKLCRTLAEAKMLADAIGKLGAASSEKESSELQSLMSDLQTERDSLQG  
QLEDLQQQKEDLTQQNSDLHTLELDEHSKDKGAALSKIKEVATSNTELTSLKHSQKRLDSISDCLDILLS  
CQEKAMDSLHQEHTELSLENRDLTSKVSLEKQLEESTQGLTHVTEEKESQVINLEGLRLDQASLDKAE  
QEKWSMQAEISQRERAAAVLQEQHAKRLQHLESSESRQLERAEALRVQLLESNSRAAAAEQSGCKLQAE  
QTLQQTQADREAEETEKQAADMQTELFQVQDRLLISESAKNRAEAQNADLCNELQTMKEQVLSLEADSKAQ  
QQQLDRREAAAMAAANKAGKELGQGLEISQVEREAVQQQLDMVHAALDQAEASKDLKGQLSTAQQGLEQS  
KSGSEELRQLGTAQQLQLEEMKTSRDDLQSHLQTAQEQQLQKQDAVQGEQLQKQLQTAQVNLQSEATRNDL  
QNHQLTAQGTAPFTKGQVCRVNRQKQLQTVLEANLQQTAEATKNDLQSHLQTAQEQQLQQRNTAQAEQLKQLQTA  
QANVQQTAEARNDLQSHLQTAQEQQLKLDOTALGELQNLQTAQASLQHTAEATRNDLQSHLQTAQEHQKQ  
DTAQVBLQKQLQTAQNLQNTQNLQTAQEQQLQKQDTQVSELQKQLQAAQANLQQTAEATRNDL  
QQQLTAQEHQKQKQDADLQNLQTAQAEKGLHSEAVRNDLQSQVLQAMQEQLNKNDAAQVLIQTALKALAN  
LQETEAATSNLQSQQLQTAQQLQKQCTAHDGLQVQLQSSMAKLEQSEASRSDLQGLQTAQEQQLQKEAA  
VGLCNSLQLEASQVLEKAEAGRNDLQSQVDLVQAQVMQSQNSDDETVAEALRVQAAHFEQECSSQLQEEKQ  
LLQWEMDMAYKVRVQCCSTLQRELGEAAHSSQQLLENNAQLCSQQQEMAKEKSYRQKEVAMQOHFEE  
QLRGLKELQGAMEEVQGRKNMLEEQLKMSQSQQELSEQLHSYQMHYORKKETIQDLEKSLQKQENAHES  
VKQLQTVQQERNKLLKENSLSLTDVKTAEKLEKEEATTKKLYQQVRSLEAQVDLANRLRQKQHVSF  
ATPAARSINTSDSIDETADETFDLEPSRQRHSTSRDDLRTLSNSQVAGEEEDGKNKNTISTDSLEGD  
SLDTSIFSRTSQDSGMSTRSQRRRTTVSIEMVQTESDRRLSRTSTEHVLDGSSISGASSWRGAAPRFVVS  
ECEEEPEQYDWRLSLQRRNLTQPRHLQSCYPTETQGTALREETDLSKTLRRTLRSQQAATFSITPG  
KKRRHEADENSASRKKTVMPSTPSKTPSVFKTPKKIASAAAGIFKKPTGKTPSSRRRSRLQGRGKSPA  
GRNLKAKTPTKTPNKHQAKQDPRRQSIAFNIGFSLPGKFRKSARKAKEKREQAQKPEQSRMSIANVKSFL  
SVNNSKTNKTKAARKPLGRNNAQTGV

**Drosophila melanogaster:**

No homolog found.

**Hydra vulgaris:**

No homolog found.

**Nematostella vectensis:**

>XP\_032223093.1 nuclear mitotic apparatus protein 1 isoform X1 [Nematostella vectensis]  
MNNERVATLLEWINSVSGNVNLPFRDSTVENVKLLVKTILHLIDKSDDEVLPGYDDATVEGLVGPFISSL  
EGYVRQKLDGIVINPNLITVDADEVEIGKVIALMLSAAVQECENANYFVKIKQSFEESVQYQIKEIITELL  
QQVEHGLGDSASAITKLLKHTTGKNKEKQELPAGTDVCVESPLFGKSPTETLFSSSPFLSLMSSPQLKTKQH  
QFTMNKHLQKVSKQLSLDAQMHMQATLEELADCKCEIDVDKTKMKLEKNKDVLHLMKVIDELESTQHYK  
ADYEKLERSERMKQRVAELEAFREQSCNLDERMADFLKKAMFKKSVEDMEQLKTKCERYKSQLEHEEF  
KASELKAALERRVKDVERLEKERDEALFAASEAMELWKARKSVEIDEEERLDGDSFPVDTQHTNLSRI  
IELEPTNEKLRAQLASAIIDPSEVQRLNDALEDAEQSKRSYEASYVEAKCKILELSDSVCKTETQFKVREK  
ELNSRLLEELTKNVLSQEKLTNHRKELSRQLSELSARGEVEAHAIASEKQATASKALDELLDERKAAE  
QAACTRYNELRRREMEKERRAEKVEEIRDCDHKIRHVTEELHGIETQQRQEMRQKRDEFPSTREDELKA  
AVERVTEERDAVKNAIEEMVGDLTLELNEVKSrvLLLESLQQASTSWESAEAAALTEAKAILEKELVSLK  
ESQALLNEDNASLNKELVAMCEKEKYIISVNKELAQISNLKMRREEEKKREASRQIADLEEKLAGMVQEI  
GRLESNTKGWEEANVWEEKAQIGKEVACLKDAFSTEMYTEKQSLAKHSRDIEGMTKINEELKAKLCS  
QKQSLDEVQNTQNGRLQREMCATEDKLLQITTLRNKILEQLLAEQQQGEERAARQAEMDHKADHAKAMQ  
EATLLNBERDAFKASLELERAQCQLVAGDEIEGFKRSQNETQELLIEKHRAKQMEELQGLQDF  
TKQNLNYEDTKQYQVQREYEMERAWKKKLTANEELVKLKGEMFENSQKHSABLCLRRQTOEKEDE  
MEGEKKNMQEHTRQTOEKLQTSETIIKGLRADIKQLEIVKKTLEVEKGQLKSICEDFAKKEKDRLLEVEK  
MTDKHEEKIAKINENQRALALKDEDAQKLMEKTEELKARMEDEHQKALGLKDEDIQKLMKEOTELKAKM  
EDEHQKALGLKDEDAQRLIKETEELKARMAEIEEARKGEVAMAEERRQKAEQKKSMDAIEHLKRLKE  
QSEESLIKESDAKFTKTNDLEKVKKALETTQESWKEKETEMAAKLAQSEQLCEDMKDDQELIERLQDEIA

KMEEQVNVINEEKGLLEEQLLEEQDTNKRLLGMQVNSLEAQVKHADMTIREQKAKMQSFENQSEKVKKTRK  
MLIEVEKVLFPVQEAQELLDESTTESDDSEMRVDDLKLTRQGSSVSFASVNGTDFGKSLSTSSISRTSLR  
STVRPSASRRQSAMYVKGSTPPTRRTTSSAAFFIVGDEFANNMEQSEYEFDWDRLAELERRNTICPPHL  
KTSYPVETQTRPSEGNGLHAARSETALTRKRKPEDTLTSSVKERKDMTTSKSEGQIKRSRKRITDMVSS  
KINSLRPSKSNENIKEKQKSGNSLAFEITPPKKRKAEPKAASDTPRRESTKKETVAFTIENSPPKKCKV  
QRTRTINRSTATTQLVRDKDRETFKREKKLETKNRIPLRSSNRKIAK

**Amphimedon queenslandica:**

No homolog found.

|                             |                                                                   |                                                           |     |
|-----------------------------|-------------------------------------------------------------------|-----------------------------------------------------------|-----|
| XP_032223093.1[N.vectensis] | --MNNERVLTALLENISVSNVGNVLFRDFTSVNKKLVKTHLHDKDSDEVLPGYDDAT         | 58                                                        |     |
| XP_019634543.1[B.belcherii] | --MFNGKGLADALQWNLILG--V-CTVESLEKLDENVNRILVRVQLIDPK-----           | 51                                                        |     |
| XP_032819484.1[P.marinus]   | --MVNGRKSAALIWNCNM--CA-EKTESLWDLDKLSYLHIHLITQTIKAS-VDVK-PLKSSA    | 54                                                        |     |
| XP_045580741.1[s.salar]     | MVLRLLDEKHAELWENHNIN-LVD-LPVSRIINDQQGVLMKMLVKIRLEKE-FPAN-SYLDQH   | 56                                                        |     |
| XP_01803294.2[X.laevis]     | MAHHSKGMEALKWCNSJLK--EPVDFRFSQLQDINILLKVVGVLSNGLEETT--SVLQON      | 57                                                        |     |
| CBN80053.1[G.gallus]        | MLPHTTTRATALLAWNSNTKACA-EPLGRSLSQLQDCRVFVIQTIINKIHT--EEGE-SVLQGS  | 57                                                        |     |
| NP_001304073.1[M.musculus]  | MTLHATRAATLLSWNSLSH-LVA-DPVETVLQDQCISFIKIINTIHT--KEGO-QILQOF      | 57                                                        |     |
| Q14980[H.sapiens]           | MTLHATRGAAILLSWSNLSH-LVA-DPVEAVLQDQCISFIKIINDIHT--KEGO-QILQOF     | 56                                                        |     |
| XP_002822235.1[P.abellii]   | MTLHATRGAAILLSWSNLSH-LVA-DPVEAVLQDQCISFIKIINDIHT--KEGO-QILQOF     | 56                                                        |     |
| :                           | : : * : *                                                         | :                                                         |     |
| XP_032223093.1[N.vectensis] | VEGLVGVTISSLESIGYRQKLID--GIVINPNLITTVDADEVIEIKRVIAIMLSAAVQECENANY | 116                                                       |     |
| XP_019634543.1[B.belcherii] | PAGRVVEVSGSLFLGFHVTLSDGDTYVRWMLIRIQANED--EIAAKATLLTIFAFVSDARQE    | 109                                                       |     |
| XP_032819484.1[P.marinus]   | EYEGKNYIREFLHQFFQFN-AQLQTVDFGVHELELAACITVFLCACVASFTEIGS           | 113                                                       |     |
| XP_045580741.1[s.salar]     | VQERKLKVVSDFLQCDRCRSTGERALISVDNINSINGLINEVELSKVILVLYSHYSVIN--NHV  | PEQRNFGLGSFLQKVRCPGSSAANSQWIKLGENLELEFSKVFIVLLPYSTMSSKNRP | 117 |
| XP_01803294.2[X.laevis]     | LAEAPAFICGFLQKCHKASTENLVASAQKLECEL--ELAKVAILLHSMSSSKSPR           | 115                                                       |     |
| CBN80053.1[G.gallus]        | PERLFDFVCSFLQKRKHHPSPCTCVSVQKVIWGESM--ELAKMMLFLYGOSTMSSRNLR       | 114                                                       |     |
| NP_001304073.1[M.musculus]  | VSERLDFVCSFLQKRKHHPSPSPECVLASQKVLGSEL--ELAKMTMLLYHSTMSSKSFR       | 114                                                       |     |
| Q14980[H.sapiens]           | VSERLDFVCSFLQKRKHHPSPSPECVLASQKVLGSEL--ELAKMTMLLYHSTMSSKSFR       | 114                                                       |     |
| XP_002822235.1[P.abellii]   | VSERLDFVCSFLQKRKHHPSPSPECVLASQKVLGSEL--ELAKMTMLLYHSTMSSKSFR       | 114                                                       |     |
| :                           | : * :                                                             | :                                                         |     |
| XP_032223093.1[N.vectensis] | FVKKI-QSFSESVQYQIKEIETILTQQVHEGGDLASAITKLKHT-----TGK-----         | 163                                                       |     |
| XP_019634543.1[B.belcherii] | RMSXMDGMGKAWEVTDIKQIINFNTINNERKGRPRFDLILLEGMSVMPT-ACINGG----      | 165                                                       |     |
| XP_032819484.1[P.marinus]   | RMKFLL-----DPDPTQILHELKFMVDNEESPQLQNVILLELNGVCVPSGPVGSIAETE       | 169                                                       |     |
| XP_045580741.1[s.salar]     | DINQL-----EYKFVEELASMRFLVDNENSILYSENLEYKRLKPFLLSPFSDISSTS--S      | KSEDF-----DHKTQTELASTIRFLVDNESCILDCKDINFLQKRRFPSSGD-----  | 165 |
| XP_01803294.2[X.laevis]     | DWNEF-----DYQIQVELATILFKVLDDHEELS--ENLEVFORRRALPPSPGT-----        | 161                                                       |     |
| CBN80053.1[G.gallus]        | DWQEF-----EYGVQAEIALVILKFLMDHEESINITDELDESFEKVP-PY--THA-----      | 159                                                       |     |
| NP_001304073.1[M.musculus]  | DWQEF-----EYKQAEIALVILKFLVDHEGINLINDELLENFLQA-PVPSTCS-----        | 161                                                       |     |
| Q14980[H.sapiens]           | DWQEF-----EYKQAEIALVILKFLVDHEGINLINDELLENFLQA-PVPSTCS-----        | 161                                                       |     |
| XP_002822235.1[P.abellii]   | DWQEF-----EYKQAEIALVILKFLVDHEGINLINDELLENFLQA-PVPSTCS-----        | 161                                                       |     |
| :                           | : * :                                                             | :                                                         |     |
| XP_032223093.1[N.vectensis] | ---NKEQGELP-----AGTCVDESPLPKSP--TET-----LFSSSPFLSLMSSPOLKTK       | 208                                                       |     |
| XP_019634543.1[B.belcherii] | ---GGRDGSLT-----HTNRHRSVATPM-SGPVPIVTRLDFSMSVPMNLMSPOMQY          | 215                                                       |     |
| XP_032819484.1[P.marinus]   | SGRFSPPLSL--PLCHTAGVRFRDIQRIASSMNLLNSLPSSMFLSQFPAVEVR             | 227                                                       |     |
| XP_045580741.1[s.salar]     | SALFNDDSPFVQKRRHGQSVOQLDITQVASSS-----VSSPLSDMIPTFOQL              | 218                                                       |     |
| XP_01803294.2[X.laevis]     | DSGSSDAMSYPVSRHRRTKTEVRFLELHVRASS--TIKSLPADAPSPMIEVLHTPQFQMR      | 224                                                       |     |
| CBN80053.1[G.gallus]        | SSSSSES-P--GLSHPOVRFLELQIASSSSSMMNLMPGTASPVPDGLVLTPOFQRL          | 217                                                       |     |
| NP_001304073.1[M.musculus]  | ST-LSEELS-P-PSHOTKRIREFLEQRIASSS--SENNFLGSSPSPMGDILQTPQFQMR       | 215                                                       |     |
| Q14980[H.sapiens]           | ST-FPEELS-P-PSHOAKREIRFLELQVASSS--SENNFLGSSPASMGDILQTPQFQMR       | 217                                                       |     |
| XP_002822235.1[P.abellii]   | ST-FPEELS-P-PSHOAKREIRFLELQVASSS--SENNFLGSSPASMGDILQTPQFQMR       | 217                                                       |     |
| :                           | : * :                                                             | :                                                         |     |
| XP_032223093.1[N.vectensis] | QHQFTMNKLHKQVSKQLSLDAQMHQMHTALEELDCKCEIDVYKTRMKRSLNDVVHLM         | 268                                                       |     |
| XP_019634543.1[B.belcherii] | TA----LTKAQOQVQQLKITELGTGKIIIDENDVQLRRQRALEQEKSMRELISARDLDGRA     | 272                                                       |     |
| XP_032819484.1[P.marinus]   | K-----LQKQLQEWQEQCKLEGLSSSKQLSQSQBEVALRQGVKRLVQ                   | 273                                                       |     |
| XP_045580741.1[s.salar]     | R-----LQRLQKRDMDRELELQTLTSATTITQRESQITQOLHRIKLE                   | 263                                                       |     |
| XP_01803294.2[X.laevis]     | R-----LKKQLSEVRECREDLEVELAQNHKHAKEASQIAMSLQOOEHILRI               | 270                                                       |     |
| CBN80053.1[G.gallus]        | R-----LKKOLAERNRDELELAENRKLITEKAOITAMQORQIDRLAL                   | 263                                                       |     |
| NP_001304073.1[M.musculus]  | R-----LKKQLADERSNRDLELELAENRKLITEKDAOITAMQORQIDRLAL               | 263                                                       |     |
| Q14980[H.sapiens]           | R-----LKKQLADERSNRDLELELAENRKLITEKDAOITAMQORQIDRLAL               | 263                                                       |     |
| XP_002822235.1[P.abellii]   | R-----LKKQLADERSNRDLELELAENRKLITEKDAOITAMQORQIDRLAL               | 263                                                       |     |
| :                           | : * :                                                             | :                                                         |     |
| XP_032223093.1[N.vectensis] | VIDELETSTQHYKADYEKLERESERMKQVIAELEAFREQS-----CNLDERMADFLEKK       | 321                                                       |     |
| XP_019634543.1[B.belcherii] | LQDENADLQARESERRKQCEKCEKITQALHEVEYVYTEQELKKQNDR-----LFEER         | 325                                                       |     |
| XP_032819484.1[P.marinus]   | LITOTFRPS-PLPSELAELEHKTQ-----RLSV--TQEQCLBKLNEMLEKRLITQALEAN      | 319                                                       |     |
| XP_045580741.1[s.salar]     | -REQEQEQEPREDLEQLHSNKNEGLRTLRLH--VLKEQCADKTNSSQMERKVDLSSTEEN      | 325                                                       |     |
| XP_01803294.2[X.laevis]     | LENREQA-ELQEPKELELREKNESSLMRLRL--TLKQCDMKTDKQLKERKNDQWAZEN        | 326                                                       |     |
| CBN80053.1[G.gallus]        | INEKQAADQLQEPREMEELERNESLIVRLHE--LTKQCDMLTEKQGMDDRKNQLSEEN        | 320                                                       |     |
| NP_001304073.1[M.musculus]  | INEKQAASSQEPKELEEELRGNESLITVRLHE--LTKQCDMLTEKQGMDDRKNQLSEEN       | 318                                                       |     |
| Q14980[H.sapiens]           | INEKQAASSPLEKELEEELRDNESLITMRHE--LTKQCDMLTEKQGMDDRKNQLSEEN        | 320                                                       |     |
| XP_002822235.1[P.abellii]   | INEKQAASSPLEKELEEELRDNESLITMRHE--LTKQCDMLTEKQGMDDRKNQLSEEN        | 320                                                       |     |
| :                           | : * :                                                             | :                                                         |     |
| XP_032223093.1[N.vectensis] | AMFKKSVEDMEQKDKTKERYKSLQHEH-----EFKAS                             | 353                                                       |     |
| XP_019634543.1[B.belcherii] | HGME-----DAMKRCQDMALQVQELQTEHLTCTGQQLQALRDSLKAKQDALQHWQEKA        | 378                                                       |     |
| XP_032819484.1[P.marinus]   | GELS-----SKVRESCTILAECRS--LFEERSASAQRHAEAVRH                      | 359                                                       |     |
| XP_045580741.1[s.salar]     | GTLSS-----AQMEVVARLASAEA--EVDRISTEAQDSQAGEWSSRFX                  | 359                                                       |     |
| XP_01803294.2[X.laevis]     | GELTF-----YKVRDLSNRALQLOE--ALYETTEEHSRLSNWOQ                      |                                                           |     |

|                             |                                                                 |      |
|-----------------------------|-----------------------------------------------------------------|------|
| XP_032223093.1[N.vectensis] | QSKRSYEAS-----YVEAKCKILEEDSVCKTETQPKVREKELNSRL                  | 496  |
| XP_019634543.1[B.belcheri]  | QEYQALKTDAAEMERALSRLGAV-----SSTKT--ALEVTLENERWTFKAKEEAYREEI     | 563  |
| XP_032819484.1[P.marinus]   | -----DQYNVTFR-----EEL                                           | 509  |
| XP_045580741.1[S.salar]     | QEVKALGEEVQCEMQRGELNLAMERQDREAREEIQELTSHVDTMGASLRRAE--EEV       | 570  |
| XP_018103294.2[X.laavis]    | KEVKDIIHHKVEERSEKQNLLENKMLEESSKKDRQELIHQVEHLDSLVKSE--GNL        | 580  |
| CBN80053.1[G.gallus]        | KEAAELRMQAEQERAQAEELRH-----RDMASQEALESLSRRVEQLGASLKHSE--EEL     | 570  |
| NP_001390473.1[M.musculus]  | QELASLKEQAKKEQAQMLQTMQ-----EQEQAAGQLRQQVEQLSSSLKLKE--QQL        | 561  |
| Q14980[H.sapiens]           | QELAGLKQQAQKEKQAQLAQLTQ-----QQEQASQGLRHQVEQLSSSLKQKE--QQL       | 567  |
| XP_002822235.1[P.abelii]    | QELAGLKQQAQKEKQAQLAQLTQ-----QQEQASQGLRHQVEQLSSSLKQKE--QQL       | 567  |
|                             | ::                                                              | ::   |
| XP_032223093.1[N.vectensis] | EELTKNVE-----                                                   | 504  |
| XP_019634543.1[B.belcheri]  | LSTKKLEGAKQKVAQLEENSVTMAVMQDEK-----DALERQLKEVSAAAEQKCLQL        | 616  |
| XP_032819484.1[P.marinus]   | DGHESKQTGVSDKDC-----VEATRARSALKQNSLEGSS--TSSR                   | 548  |
| XP_045580741.1[S.salar]     | QVREKQLTKQQQESA-----LQREVLQEEMA--ASEKALKELKQEEAVREAEATR         | 618  |
| XP_018103294.2[X.laavis]    | VGITQQLESKTKE-----ADYLREEQKKIICERDSSLSTLNEYKC-----              | 620  |
| CBN80053.1[G.gallus]        | VRVTQEAEKG-----ARQLGAHEKAVQERDAALQQLQHLQO-----                  | 607  |
| NP_001390473.1[M.musculus]  | EEAAKEQEAATRDHA-----QQLAIVAEAREASLRERDARQQLLETVEK-----          | 605  |
| Q14980[H.sapiens]           | KEVAEKQEAATRDHA-----QQLATAAEEREASLRERDAALKQLEALEK-----          | 611  |
| XP_002822235.1[P.abelii]    | KEVVEKQEAATRDHA-----QQLATAAEEREASLRERDAALKQLEALEK-----          | 611  |
|                             | ::                                                              | ::   |
| XP_032223093.1[N.vectensis] | ----LSQEKLT-----HNRKELSRLQSELSLARGEVE-----A                     | 533  |
| XP_019634543.1[B.belcheri]  | NQQVSLQEEKAADVANL-----EGYKARVEAEMTGLQKELEQTLHDKTSAESALHNTKE     | 671  |
| XP_032819484.1[P.marinus]   | -----REMGIARGVQENFEFKNNGHRDTLEQGRILLQQERVALSKER-----            | 590  |
| XP_045580741.1[S.salar]     | -----LHQEITTHVTDLC-----SLRQEHQALQELARQQEEI-----SLEKE            | 656  |
| XP_018103294.2[X.laavis]    | -----KQDEEPIALNGTLRTMQDH-----QTSLS                              | 645  |
| CBN80053.1[G.gallus]        | -----AKKQLAALSSQLQSLEAAS-----KA                                 | 629  |
| NP_001390473.1[M.musculus]  | -----EKDAKLESLQQQLQAANDAR-----DNAQT                             | 630  |
| Q14980[H.sapiens]           | -----EKAAKLEILQQQLQVANEAR-----DSAQT                             | 636  |
| XP_002822235.1[P.abelii]    | -----EKAAKLETLQQQLQAANEAR-----DSAQT                             | 636  |
|                             | *                                                               |      |
| XP_032223093.1[N.vectensis] | HAIASEKQRATASKALDELDERKAAEQAACTRY-----                          | 567  |
| XP_019634543.1[B.belcheri]  | QLTAVSQKEAAITSALEQVQKQ-----                                     | 693  |
| XP_032819484.1[P.marinus]   | --DILERERAALKE--QMA-VIAMGAGN-----                               | 614  |
| XP_045580741.1[S.salar]     | AQAAMHREKAEVAELSRQLQEE-VRSLSGEQMAQLEEAQREKERLLQLSTENMETLQTERA   | 715  |
| XP_018103294.2[X.laavis]    | VTEELKREKAELASKVQELDAT-ILDLIACQNLD--                            | 680  |
| CBN80053.1[G.gallus]        | SSMEMQKEKAELNKKVQELQAR-VLELSAQCCQSSA-----                       | 664  |
| NP_001390473.1[M.musculus]  | SVTQAQKEKAELSQRKIGELHAC-IEASH-----                              | 657  |
| Q14980[H.sapiens]           | SVTQAQKEKAELSRKVEELQAC-VETAR-----                               | 663  |
| XP_002822235.1[P.abelii]    | SVTQAQKEKAELSRKVEELRAC-VETAR-----                               | 663  |
|                             | :::                                                             |      |
| XP_032223093.1[N.vectensis] | -----K-----                                                     | 568  |
| XP_019634543.1[B.belcheri]  | -----K-----EEEAGQLQDQIVTANTENSS                                 | 714  |
| XP_032819484.1[P.marinus]   | --RSIIMGHMLTTEASIAQORA---ILD--QE---KNNKNLEKA---ALKMADEIN-       | 658  |
| XP_045580741.1[S.salar]     | AASSLAAEKDLELSLREEVRAREEQQLAMQEEV-----RLRQEELEQELAAQENIN-       | 768  |
| XP_018103294.2[X.laavis]    | ENDSQSKSHAITVESLKAQLSEQESQVKIYQKKLLSSNELSVSKENSQKLEQLLSMEESVR-  | 739  |
| CBN80053.1[G.gallus]        | QAG-----SAETLRAQLRELEGLKDSQKGLADKEKVAKENLRLQERLLFLEESVR-        | 715  |
| NP_001390473.1[M.musculus]  | --Q-----EQRVQARVTELEAQLKAEQKKTTEREKVQVQEAQLEQLRALEESLK-         | 706  |
| Q14980[H.sapiens]           | --Q-----EQHEAQAQVALEQLRSEQQKATEKERVQAEKQDQLEQLQALKEESLK-        | 712  |
| XP_002822235.1[P.abelii]    | --Q-----EQHEAQAQVALEFQLRSEQQKATEKERVQAEKQDQLEQLRALKESLK-        | 712  |
|                             | :                                                               | :    |
| XP_032223093.1[N.vectensis] | -----ELRREMESKERRAEKEV-----EIRRDCHK-----IRHV-----               | 599  |
| XP_019634543.1[B.belcheri]  | LAADLESKAKLRTLEAEKAMLADAI-----GKLGAASSEKESKELQSL-----           | 757  |
| XP_032819484.1[P.marinus]   | -----INLR-----QKSRLLDQEKRLQDMITL-----KQKWNVCE-QEQ-DNL-----      | 696  |
| XP_045580741.1[S.salar]     | -----NMRE-----RLAGLLDQISLLKEVCQE-GKNMREALREHAAQLEQ              | 807  |
| XP_018103294.2[X.laavis]    | -----NLSEHLDEKMKFAASLDGDSKRIHLEE--E-----MKKL-----               | 773  |
| CBN80053.1[G.gallus]        | -----NTEGILEDEKKRAAESLEGNLARIAELEA--E-----KQOL-----             | 749  |
| NP_001390473.1[M.musculus]  | -----ITKGSLEEKKRAADALKEQQCRATEMEA--E-----TRSL-----              | 740  |
| Q14980[H.sapiens]           | -----VTKGSLEEKKRAADALEEQRCISELKA--E-----TRSL-----               | 746  |
| XP_002822235.1[P.abelii]    | -----VTKGSLEEKKRAADALEEQRCISELKA--E-----TRSL-----               | 746  |
|                             | :                                                               | :    |
| XP_032223093.1[N.vectensis] | ----TEELH-----GILETQRQEMQRKDEFSTREDELKAAVERVTEERDA----          | 641  |
| XP_019634543.1[B.belcheri]  | -----MSDLQTERDSLQQLDELQOQ-----                                  | 778  |
| XP_032819484.1[P.marinus]   | -----VKE---RAIEDQS                                              | 706  |
| XP_045580741.1[S.salar]     | LRLVKEQVEQVQERNEETSAAALREKESSLREKESSLREKESSLRGLEELQSTTSLASQR    | 867  |
| XP_018103294.2[X.laavis]    | -----TESRDAALRNLEDEERTAGKKIESQL                                 | 798  |
| CBN80053.1[G.gallus]        | -----VORGEQALQHSSEELARRQALETRL                                  | 774  |
| NP_001390473.1[M.musculus]  | -----MEQREEREKELEQEKAGRGKLEARI                                  | 765  |
| Q14980[H.sapiens]           | -----VEQHKREKELEERAGRGKLEARL                                    | 771  |
| XP_002822235.1[P.abelii]    | -----VEQHKREKELEERAGRGKLEARL                                    | 771  |
|                             | :                                                               | :    |
| XP_032223093.1[N.vectensis] | -----V-----KNAYEEMVGDKLTELENEVK-----                            | 662  |
| XP_019634543.1[B.belcheri]  | -----KEDLTQQNSDLHTELDEHSKDKGAALSK                               | 806  |
| XP_032819484.1[P.marinus]   | K-----ASPTKEIYYLKA-----SLEETSGMK-----                           | 729  |
| XP_045580741.1[S.salar]     | QOELTSLKEEVIYSLQEVEVRRRAAEALAVEAEAREELVESVALQDDAQDNDMKRQK       | 927  |
| XP_018103294.2[X.laavis]    | KN-----L-----EEEYHRSNESQHAQLAESCAITKQREEE                       | 829  |
| CBN80053.1[G.gallus]        | QQ-----V-----AEERREETAALQRLAEVAKGEGERGR                         | 805  |
| NP_001390473.1[M.musculus]  | QQ-----L-----EEAHQAEETALRHLEAATAAQHRAESE                        | 796  |
| Q14980[H.sapiens]           | QQ-----L-----GEAHQAEETVLRRLAEAMAAQHTAESE                        | 802  |
| XP_002822235.1[P.abelii]    | QQ-----L-----GEAHQAEETVLRRLAEAMAAQHTAESE                        | 802  |
|                             | *                                                               |      |
| XP_032223093.1[N.vectensis] | -----SRVLEEESLQQAQSTSWESA-EAALTEAKAILEKELVSLKESQ-----           | 703  |
| XP_019634543.1[B.belcheri]  | I-----KEVAT-----SNTLTKTSLKHSGRKRLDSISDC                         | 834  |
| XP_032819484.1[P.marinus]   | -----ARVEQERVLLN-----EREKIQTISITANQ-----                        | 754  |
| XP_045580741.1[S.salar]     | CERLEQDLEQRTGLVEELRQHEHS-----ARLEATRLRQESTHLSRLLEVQRE           | 976  |
| XP_018103294.2[X.laavis]    | RDELSKVVDIWKARYGESQKQIAQNSCHMQEQIEELKKTSHDQVQQLGERSKVLMEAK      | 889  |
| CBN80053.1[G.gallus]        | LEKRLQE-----LSREHGQACQRLQAEQERVALEAR                            | 837  |
| NP_001390473.1[M.musculus]  | CERLIREVESRQKRFARQEQEARYGAMFQEQLMALKGEXTGQ--EVQ-----EEAVEIH     | 849  |
| Q14980[H.sapiens]           | CBLVLKEVAWVRERYEDSQEEAQYGAMFQEQLMTLKEECEKARQELQAEKQVAGIESH      | 862  |
| XP_002822235.1[P.abelii]    | CBLVLKEVAWVRERYEDSQEEAQYGAMFQEQLMTLKEECEKARQELQAEKQVAGIESH      | 862  |
|                             | :                                                               | :    |
| XP_032223093.1[N.vectensis] | -----ALLNEDNASLNKELVAMCE-----KEK                                | 725  |
| XP_019634543.1[B.belcheri]  | LDILLSCQEKAMDSLHQHETELS-----LENRLDTSKVSKELEKQLEE-----STG        | 879  |
| XP_032819484.1[P.marinus]   | -----NDTASLQREIRIAMQO-EVDVREQARSALICVAA-LEKIEV---MPGNE-         | 798  |
| XP_045580741.1[S.salar]     | KEELRG-----EVSLLHQQRAAVLQOSLEEQEVAMRVLEKQKESSTREETTVTKTEALQAQLE | 1031 |
| XP_018103294.2[X.laavis]    | ASETKSSQLEKINQLEGLSAANA-CIKEREAEKKVLSALHSAEKLKIA---YQGESE       | 945  |
| CBN80053.1[G.gallus]        | VARMASEQQQLAALQDLQARAKE-K-----EGKE-----QEKI-A-----SAE           | 874  |
| NP_001390473.1[M.musculus]  | SEGQPGQQQSQAQLHASLAKAIQ-QVQEKEVRAQKLVDLSALQEKMAA-----TNK        | 901  |
| Q14980[H.sapiens]           | SELQISRQQNELAELHANLALALQ-QVQEKEVRAQKLADDLSTLQEKMAA-----TSK      | 914  |
| XP_002822235.1[P.abelii]    | SELQISRQQNELAELHANLALALQ-QVQEKEVRAQKLADDLSTLQEKMAA-----TSK      | 914  |
|                             | *                                                               |      |
| XP_032223093.1[N.vectensis] | YIISVNKELEAQISNLKMR-----EEEKREASRQIADLEE---KLGMVQEI             | 771  |
| XP_019634543.1[B.belcheri]  | QLTHVTEEKESQVNLNLEGLRDLQASLDKAEQKWSMQAEISQRERAAVLEQHAQLRLQ      | 939  |
| XP_032819484.1[P.marinus]   | -----KGSV-----ICALLEGMTTLKAIL-----GLDKGIACEGTH-----ID-----      | 831  |
| XP_045580741.1[S.salar]     | VVSSLAAAKDLQLSTLREAEATLQELAKREQ--EISLQKREVLQEAHREKESLEAL-----   | 1085 |

|                             |                                                                     |      |
|-----------------------------|---------------------------------------------------------------------|------|
| XP_018103294.2[X.laavis]    | RLSHL-----ETALSNKQDLDCIAKELSDKEYKKA-EFEAM----                       | 981  |
| CBN80053.1[G.gallus]        | RVGKL-----EAEVRKASEALEAVSKELSEE-----                                | 900  |
| NP_001390473.1[M.musculus]  | EVACL-----KTLVLRKAGEQQTASLELLKEPPRAA-NRA-----                       | 935  |
| Q14980[H.sapiens]           | EVARL-----ETLVRKAGEQQTASRELVKPEPARAG-DRQ-----                       | 948  |
| XP_002822235.1[P.abelii]    | EVARL-----ETLVRKAGEQQTASRELVKPEPARAG-DGQ-----                       | 948  |
| :                           | :                                                                   |      |
| XP_032223093.1[N.vectensis] | RLSESNKGWEEFANV-----WVEEK-----                                      | 791  |
| XP_019634543.1[B.belcheri]  | HLESSESRQLER-AEALRVQLLESNSRAAAAEQSCGKLQAEQLTQQTADREAETEKQA          | 998  |
| XP_032819484.1[P.marinus]   | -----MADNGIVAQAVLQQQRTPE-----                                       | 850  |
| XP_045580741.1[S.salar]     | -----REELARQQEELREELILQQQRAQSLQESLEEQQEALKEL-----T-----LKE          | 1128 |
| XP_018103294.2[X.laavis]    | -----VKVLKEQNS-----ERIASLESELKNSLAVVKER-----K-----CES               | 1014 |
| CBN80053.1[G.gallus]        | -----SDQLGEQQG-----RPF-----SSTHAIVKAM-----E-----REA                 | 961  |
| NP_001390473.1[M.musculus]  | -----PEWLEEQQG-----RQF-----CSTQAALQAM-----E-----REA                 | 974  |
| Q14980[H.sapiens]           | -----PEWLEEQQG-----RQF-----CSTQAALQAM-----E-----REA                 | 974  |
| XP_002822235.1[P.abelii]    | -----PEWLEEQQG-----RQF-----CSTQAALQAM-----E-----REA                 | 974  |
| XP_032223093.1[N.vectensis] | AQIGKEVACLKDAFSTEMQTEKQSLEA-----KHSRDI-----                         | 824  |
| XP_019634543.1[B.belcheri]  | ADMQTELQFVQDRLILSESASN-----RAEAQNADLQNELQTMKEQVLSLEADSKAQQQQL       | 1054 |
| XP_032819484.1[P.marinus]   | -----A-----QDNYFISVGKHGM-----GHRE-----RDTLQCEKDKT-----NI-----E----- | 882  |
| XP_045580741.1[S.salar]     | ERAREATQLRQOIST-----HLSRL-----E-----                                | 1150 |
| XP_018103294.2[X.laavis]    | EKLGSVEHLKRQLDDSSQKHKEALAKNIEIKQLIDAKEKATSDI-----                   | 1060 |
| CBN80053.1[G.gallus]        | TQEAASEVARLSAALEEAAREHGEALARRREEAKRLQKELEDAKADC-----A-----          | 958  |
| NP_001390473.1[M.musculus]  | EQMGLELERLAALIKSQGQQQEEERGQQEREVARLTQERGQAQADL-----A-----           | 1008 |
| Q14980[H.sapiens]           | EQMGLELERLAALMESQGGQQQEEERGQQEREVARLTQERGQAQADL-----A-----          | 1021 |
| XP_002822235.1[P.abelii]    | EQMGLELERLAALMESQGGQQQEEERGQQEREVARLTQERGQAQADL-----A-----          | 1021 |
| XP_032223093.1[N.vectensis] | -----EGMTKINEELKAKL-----CSQKQSLDEVITQNYGRQLQREMCATEDKLL---          | 867  |
| XP_019634543.1[B.belcheri]  | RDRSEAMAAANKAGKELQGLLEISQVEREAVQQQLDMVHAALDQAEASKCDLKGQLS---        | 1111 |
| XP_032819484.1[P.marinus]   | -----ETWGDERSLSQ-----RESLVS-----LDQNSDVLDRDQ-----                   | 912  |
| XP_045580741.1[S.salar]     | -----EVQ-----RGKEELREQEKEAREETTVMKEALQAQLVVSLSAAAKDLQSLTREAESLLC    | 1206 |
| XP_018103294.2[X.laavis]    | -----AIKSEMGALQKAVDTHKSEFSALQNELSRSLDFITAKEGEVERLINKEAA---          | 1110 |
| CBN80053.1[G.gallus]        | -----AEK-----ARKVELEVQLQNSINEQVERSAHQELARSLEETEEKEGDELRLKNNV---     | 1011 |
| NP_001390473.1[M.musculus]  | -----QEK-----AKAELEMRLQNTLINEQRVEFAALQEAALAHALTEKEGTDQELAKLRGQEA--- | 1061 |
| Q14980[H.sapiens]           | -----LEK-----AARAELEMRLQNALNEQRVEFATLQEAALAHALTEKEGKDQELAKLRGLEA--- | 1074 |
| XP_002822235.1[P.abelii]    | -----LEK-----AARAELEMRLQNALNEQRVEFATLQEAALAHALTEKEGKDQELAKLRGLEA--- | 1074 |
| :                           | :                                                                   |      |
| XP_032223093.1[N.vectensis] | -----QITRERNKIEBQLL-----A-----EQQGGEERAAR                           | 893  |
| XP_019634543.1[B.belcheri]  | -----TAQQQLEQ-----SKSGSEELRRQLGTAAQ                                 | 1136 |
| XP_032819484.1[P.marinus]   | -----ADLETVRDVLKADTKMAVLAPMQESAARKVDFMEEDCSPLDQEDS-----             | 957  |
| XP_045580741.1[S.salar]     | QENTKRAADLKDVQLEKIRLESLLS-----E-----EHRALK-----EDLAKQEEELRGEVSLHQ   | 1257 |
| XP_018103294.2[X.laavis]    | -----LQEEETQQQQQTMKLTTEILT-----ALAAALK-----EKVALQEBEKQVQVATKG       | 1156 |
| CBN80053.1[G.gallus]        | -----SRGEELRLQKQTVSKLKGELA-----SVEAVK-----ERASKMDSRLQCFLEAARS       | 1057 |
| NP_001390473.1[M.musculus]  | -----AQRTLEKELQQTLEQLKIQLV-----KKEKEH-----PAGASGEDASG-----          | 1100 |
| Q14980[H.sapiens]           | -----AQIKELEELRQTVKQLKEQLA-----KKEKEH-----A-----SG-----             | 1104 |
| XP_002822235.1[P.abelii]    | -----AQIKELEELRQTVKQLKEQLA-----KKEKEH-----A-----SG-----             | 1104 |
| :                           | :                                                                   |      |
| XP_032223093.1[N.vectensis] | QAEEMDHIAKHAK-----A-----MQEATDLLNRERDAFKAQSLERLERA                  | 933  |
| XP_019634543.1[B.belcheri]  | QLEEMKT-----SRDDLQSHLQTAQEQLQKQDAVGELQKQLQTAQV-----NLQQ-----        | 1182 |
| XP_032819484.1[P.marinus]   | -DATVRNQKAFTPA-----ETVRLVQANLDHEQI-----VF-----RDSLQHEVAVLEQK        | 1001 |
| XP_045580741.1[S.salar]     | RAAELQ-----LSLEEKQEAELRELKEQLVQQQE-DSSL-----                        | 1289 |
| XP_018103294.2[X.laavis]    | AEEMEANKLSITSEKSKRIECLQEDIKNQKTDLSITQEQYQSKSLSEAQGHQALADLEKK        | 1216 |
| CBN80053.1[G.gallus]        | RDAEMDSIKAVYAK-EASLKNLEEKIRHREQESGSDQLYQKEKLQAQMLSVEVERLEQK         | 1161 |
| NP_001390473.1[M.musculus]  | -----PGTQSET-----AG-----KTDAPGPELQALRAEISKLEQQ                      | 1131 |
| Q14980[H.sapiens]           | -----SGAQSEA-----AG-----RTEPTGPKLEALRAEVSKLEQQ                      | 1135 |
| XP_002822235.1[P.abelii]    | -----SGAQSEA-----AG-----RTEPTGPKLEALRAEVSKLEQQ                      | 1135 |
| XP_032223093.1[N.vectensis] | CQGLKVAGDEIEGF-----KRSQNETQELLIHE                                   | 961  |
| XP_019634543.1[B.belcheri]  | -----SEATRNDLQNLHQTAAQTAPTQKGVCRVQKQLQTVANLQQTATKNDLQSHLQTA         | 1239 |
| XP_032819484.1[P.marinus]   | R-----QKVLQEA-----QAAALQOEAVDALRGVESLHQRAAELQHQAAL                  | 1026 |
| XP_045580741.1[S.salar]     | CKEKQELICEAQNKAAEAKTLASEKASMEKLGKIQTLTLENIQKQERQKTCDLQKQLEVS        | 1276 |
| XP_018103294.2[X.laavis]    | CREQDDITAGLEKAVAEG-----SQQQQAELALQREAVRHRETAALQRLLDAS               | 1166 |
| CBN80053.1[G.gallus]        | CQQQQQVEGLTHS-----LKSE                                              | 1149 |
| NP_001390473.1[M.musculus]  | CQKQEQEADSLERS-----LEAE                                             | 1153 |
| Q14980[H.sapiens]           | CQQQQQADSLERS-----LEAE                                              | 1153 |
| XP_002822235.1[P.abelii]    | CQQQQQADSLERS-----LEAE                                              | 1153 |
| XP_032223093.1[N.vectensis] | K-----HRAKQMEEELEQLRQDFSTKQKNLYEDTTK                                | 992  |
| XP_019634543.1[B.belcheri]  | -----QEQLOQKN-----TAQAEQLQKQ                                        | 1256 |
| XP_032819484.1[P.marinus]   | RME-----ADSLKAA-----LQLEEI-----VFRATL-----NEERTV                    | 1054 |
| XP_045580741.1[S.salar]     | RQEKEKSTEEATLKMEALKAAKDLQLSALTEKATALQELQAKRQEELSLQKEVLQEAHRE        | 1390 |
| XP_018103294.2[X.laavis]    | R-----ALQAEKETEL-----EALKKELFHHVQELQESQSKSFSDSNRE                   | 1314 |
| CBN80053.1[G.gallus]        | R-----SAQALQDGTV-----ESLRKELQDKSKELAQSKMAVAVAAREE                   | 1204 |
| NP_001390473.1[M.musculus]  | R-----ACRAEQDKAL-----ETLQGLQLEKAKELGHQQAASASAQRE                    | 1187 |
| Q14980[H.sapiens]           | R-----ASRAERDSAL-----ETLQGLQLEKAKELGHQQSALASAQRE                    | 1191 |
| XP_002822235.1[P.abelii]    | R-----ASRAERDSSL-----ETLQGLQLEKAKELGHQQSALASAQRE                    | 1191 |
| :                           | :                                                                   |      |
| XP_032223093.1[N.vectensis] | K-----QTQVRQEYEMERAAMKKLETANEEL-----                                | 1019 |
| XP_019634543.1[B.belcheri]  | LQTAQANVQQTAAARNDLQSHLQIAQEQLKLDKDTALGELQNLQTAQASLQHTAETR--         | 1313 |
| XP_032819484.1[P.marinus]   | LEEMKFKVQDNTLLQDQEKVK-----LQRDRDLLEDEKVSIERERV--                    | 1095 |
| XP_045580741.1[S.salar]     | KESVEALREELARQEEELREELIL-----QQQRAQSLQESLEEQQEALKELTKEERAREEA       | 1447 |
| XP_018103294.2[X.laavis]    | LSSMLSEVQERQALTEAKEQAEQYQKVIDMKNKEVNSLQAEINILSSKVTSKEEVS---         | 1371 |
| CBN80053.1[G.gallus]        | VASLRAAAQEKGHLEEGWKEQLSQCIQELERKNSLLGSLSEEVSIILHRQLTEKEGES---       | 1261 |
| NP_001390473.1[M.musculus]  | LAAFRKAKAQDHSKAEDEWKAQVARGQEAERKNSLSSLEEVSILNRQVLEKEGES---          | 1244 |
| Q14980[H.sapiens]           | LAAFRKTKVDHSKAEDEWKAQVARGQEAERKNSLSSLEEVSILNRQVLEKEGES---           | 1248 |
| XP_002822235.1[P.abelii]    | LAAFRKTKVDHSKAEDEWKAQVARGQEAERKNSLSSLEEVSILNRQVLEKEGES---           | 1248 |
| :                           | :                                                                   |      |
| XP_032223093.1[N.vectensis] | -----NDLQSHLQTAQ-----EHL-QQKDTAQVEL-----QKQLQT-AQVNLQQAEC           | 1019 |
| XP_019634543.1[B.belcheri]  | -----ALDK-----MKA-----TLEMKATWKEKRVVLVAFLEQ                         | 1353 |
| XP_032819484.1[P.marinus]   | TQLRQQISTHLSRLSEVQRKKEELREQEKEAREETTVMKEALQAQLEV-----VSSLAAAKDL     | 1125 |
| XP_045580741.1[S.salar]     | -----ADFEQ-----RLQGETSKSAKLEKLLKHLTEVEV-----SSKELVEKNK              | 1505 |
| XP_018103294.2[X.laavis]    | -----KELKR-----LVMAESEKSKLEERLRLVLTQEMAT--AASRAAER--                | 1411 |
| CBN80053.1[G.gallus]        | -----KELKR-----LVMAESEKSKLEERLRLVLTQEMAT--AASRAAER--                | 1299 |
| NP_001390473.1[M.musculus]  | -----KELKR-----LVMAESEKSKLEERLRLVLTQEMAT--NSARAAER--                | 1282 |
| Q14980[H.sapiens]           | -----KELKR-----LVMAESEKSKLEERLRLVLTQEMAT--NSARAAER--                | 1286 |
| XP_002822235.1[P.abelii]    | -----KELQ-----LVMAESEKSKLEERLRLVLTQEMAT--NSARAAER--                 | 1286 |
| XP_032223093.1[N.vectensis] | -----VKLRGEMFENSQK-----HSAELICLRQT-----QEKEDEME                     | 1052 |
| XP_019634543.1[B.belcheri]  | TRNDLQSHLQTAQEQLQKQDQTV-----QGE-----LQKQLQAAQANLQQTATRNLIQ          | 1401 |
| XP_032819484.1[P.marinus]   | -RVTLKRELAALHGERAKWTTE-----SERLVQEQALLEQQRVALQEQERESLD-----QHR      | 1175 |
| XP_045580741.1[S.salar]     | QLSTLREEASLQCQENTKRAADLKDVQLEKIRL-ESLSEEHRALKEDL-----AKQQEELR       | 1561 |
| XP_018103294.2[X.laavis]    | AVDILRTAEQTFKGEADEQRMA-----VD-----CLQKLLSQAEITNNLIQ                 | 1452 |
| CBN80053.1[G.gallus]        | -CSLMKVEVQRQCEEMEKQRTM-----IE-----ALKRDRHQCEREELR                   | 1339 |
| NP_001390473.1[M.musculus]  | -SSALREEVQSLREEVEKQRVV-----SE-----NSRQELASQAERAELG                  | 1322 |
| Q14980[H.sapiens]           | -SSALREEVQSLREEAEKQVVA-----SE-----NLQELTSQAERAELG                   | 1326 |

|                             |                                                              |      |
|-----------------------------|--------------------------------------------------------------|------|
| XP_002822235.1[P.abelii]    | -SCALREEVQSLREEAEKQVRA-----SE-----NLRQELTSQAERAELG           | 1326 |
| XP_032223093.1[N.vectensis] | GE--KKNMQEHTR-----QTQEKLQT-----SE-TIIKGLRADIKQLEIVKKTLE      | 1094 |
| XP_019634543.1[B.belcheri]  | GQ--LHTAQEHL-----QKQDADLQNLQTAAG--KLE--HSEAVRN-----          | 1437 |
| XP_032819484.1[P.marinus]   | GNLKVKSEQERAAQSETMYKVQENACLR-----EQKTLI-HDMAELRTT-----       | 1220 |
| XP_045580741.1[S.salar]     | GE--VSLHQQRAA-----ELQHQAALRQEKEKSTEEATLKMEALKAAKDLQLSAL----  | 1610 |
| XP_018103294.2[X.laavis]    | QE--IQSWQKNCA-----EKEQKICSLQ--QNLNSNQ--SLL-EEFASLKRS-----    | 1492 |
| CBN80053.1[G.gallus]        | QE--KVKQCKFF-----KQEQLSSLQ--QELGSAQ--ALA-GEVPLKHL-----       | 1379 |
| NP_001390473.1[M.musculus]  | QE--LKAWQEKFF-----KQEALQALQ--LEHTSTQ--ALV-SELLPAKHL-----     | 1362 |
| Q14980[H.sapiens]           | QE--LKAWQEKFF-----KQEALQALQ--LEHTSTQ--ALV-SELLPAKHL-----     | 1366 |
| XP_002822235.1[P.abelii]    | QE--LKAWQEKFF-----KQEALQALQ--LEHTSTQ--ALV-SELLPAKHL-----     | 1366 |
|                             | : *.. : * : :                                                |      |
| XP_032223093.1[N.vectensis] | VEKGQLKSICEDFAKKEKDRLLVEKMTKDHEEKIAKIKNENQRALAKDEDAQKLMKET   | 1154 |
| XP_019634543.1[B.belcheri]  | -----DLQ--SQL-----QAMQEQLNKKDAAGV-LQIQLKTALANLQET            | 1474 |
| XP_032819484.1[P.marinus]   | -----VD--EEM-----SWARKRVALDKKAENER-VKSNLDRE-----             | 1252 |
| XP_045580741.1[S.salar]     | --TEKAIALQEQAKREQEISLQKEVLQEAH-----REKESLEA-LREELARQQUEELREE | 1662 |
| XP_018103294.2[X.laavis]    | -----YQETLAERGLMQKHQELLSHKNLTER-FQAELEKTKEDMAEI              | 1535 |
| CBN80053.1[G.gallus]        | -----CQQLQAERASLESKHXEDLEQRAKATTA-LQAEILARARVEVAEL           | 1422 |
| NP_001390473.1[M.musculus]  | -----CQQLQAEQAAAEKRFRELEQSKQAAGG-LQAEILMQAQLREL              | 1405 |
| Q14980[H.sapiens]           | -----CQQLQAEQAAAEKRFRELEQSKQAAGG-LRAELLRQAQLREL              | 1409 |
| XP_002822235.1[P.abelii]    | -----CQQLQAEQAAAEKRFRELEQSKQAAGG-LRAELLRQAQLREL              | 1409 |
|                             | : : :                                                        |      |
| XP_032223093.1[N.vectensis] | EELKAKM-----E-----                                           | 1162 |
| XP_019634543.1[B.belcheri]  | EATKSNL-----                                                 | 1481 |
| XP_032819484.1[P.marinus]   | MAVIKQKSLLDQSM-----                                          | 1269 |
| XP_045580741.1[S.salar]     | LTLQQRASQLSLEQSLQEEQKALKELTKEERAREEATLKMVALQAQKDELSTLRQEATQ  | 1722 |
| XP_018103294.2[X.laavis]    | VLLKEKL-----NNQELQLH-----K                                   | 1551 |
| CBN80053.1[G.gallus]        | PALDRRA-----AEQERALQ-----R                                   | 1438 |
| NP_001390473.1[M.musculus]  | GSLSRQK-----VEQERAAQ-----Q                                   | 1421 |
| Q14980[H.sapiens]           | IPLRQKV-----AEQERTAQ-----Q                                   | 1425 |
| XP_002822235.1[P.abelii]    | IPLRQKV-----AEQERTAQ-----Q                                   | 1425 |
|                             | : :                                                          |      |
| XP_032223093.1[N.vectensis] | -----D-EH-----QKALGLKDEDIQKLMKETDELKARMEDE-----              | 1193 |
| XP_019634543.1[B.belcheri]  | -----QSOL-----QTAQGLQLE-----KCTAHDGLQVQLQSSMAKLEQSE          | 1517 |
| XP_032819484.1[P.marinus]   | FALERTDFLHKAMENKSNLKTLETDCIVLE-----Q--EKTGPQK--VK-----       | 1312 |
| XP_045580741.1[S.salar]     | LQKEISTHVSHLEEV-----KSEGPLRE-----EHTALQVQLAKQQ-----          | 1758 |
| XP_018103294.2[X.laavis]    | LQSENSDQSSQISNL-----QVNSRLG-----ENQSLQSISDQDA-----           | 1588 |
| CBN80053.1[G.gallus]        | LQKETSASSERLAAL-----QAANSRLAE-----ENRALSSESVRGQ-----         | 1475 |
| NP_001390473.1[M.musculus]  | LRAEKASYAEQLSML-----KKAHGLLAE-----ENRGLGERANLGR-----         | 1458 |
| Q14980[H.sapiens]           | LRAEKASYAEQLSML-----KKAHGLLAE-----ENRGLGERANLGR-----         | 1462 |
| XP_002822235.1[P.abelii]    | LRAEKASYAEQLSML-----KKAHGLLAE-----ENRGLGERANLGR-----         | 1462 |
|                             | : :                                                          |      |
| XP_032223093.1[N.vectensis] | -----HQKALGLKDE-----DAQRLIKEETEELKA-----KMAIEEAR--KGEVA      | 1231 |
| XP_019634543.1[B.belcheri]  | ASRSDLQGLQTAQEQ-----LQKQEAAGVCLNSQLEASQVQLEKAEAGRNDLQ        | 1566 |
| XP_032819484.1[P.marinus]   | ---GLLDLESATAKQERDVCKAKQASNTLTQRRAAEALSSSVRHSVVLQEQ-----     | 1361 |
| XP_045580741.1[S.salar]     | ---EENSILQKGLLQE-----VQ--ATVLQEREAKALRGVSLHQSSL--EE--QQVA    | 1802 |
| XP_018103294.2[X.laavis]    | ---KKLSIEMSTLKE-----Q-----HEEEMKTLRLQYEKTQREGNEQV--QDLS      | 1628 |
| CBN80053.1[G.gallus]        | ---QRLDAELGQARE-----K-----HTRELCVRLAEAKMASSRQEA--EEAA        | 1515 |
| NP_001390473.1[M.musculus]  | ---QFLEVELDQARE-----K-----YVQELAAVTRDAETHLAEMRQEA--QSTS      | 1498 |
| Q14980[H.sapiens]           | ---QFLEVELDQARE-----K-----YVQELAAVTRDAETHLAEMRQEA--QSTA      | 1502 |
| XP_002822235.1[P.abelii]    | ---QFLEVELDQARE-----K-----YVQELAAVTRDAETHLAEMRQEA--QSTA      | 1502 |
|                             | : :                                                          |      |
| XP_032223093.1[N.vectensis] | MAEEERRQKAE-----                                             | 1249 |
| XP_019634543.1[B.belcheri]  | SQVLDVQAQYMQSQNSSDETVAELRVQAAHFQECSQLQEEKQQLLKQWEDMAYKVRVE   | 1626 |
| XP_032819484.1[P.marinus]   | -----MYDA-----VPKPRQAATQHHETE                                | 1381 |
| XP_045580741.1[S.salar]     | VBETLARQKEEQ-----AAGV--QKELMEQFVSLQKEKALLTRALQAEQNSQSELE     | 1853 |
| XP_018103294.2[X.laavis]    | LRLETATSKYDH-----V--KSKVLLQKTFQEEKQMLLIRBELAAAKKEQS          | 1674 |
| CBN80053.1[G.gallus]        | RKLEAMSNKYEN-----T--KVKVLEERQKFOEERQKILMAQVQLELVFQKEQA       | 1561 |
| NP_001390473.1[M.musculus]  | RELEVMTAKYEG-----A--KVKVLEERQKFOEERQKILTAQVQLELVFQREQT       | 1544 |
| Q14980[H.sapiens]           | RELEVMTAKYEG-----A--KVKVLEERQKFOEERQKILTAQVQLELVFQREQT       | 1548 |
| XP_002822235.1[P.abelii]    | RELEVMTAKYEG-----A--KVKVLEERQKFOEERQKILTAQVQLELVFQREQT       | 1548 |
|                             | : :                                                          |      |
| XP_032223093.1[N.vectensis] | AEIHCLKRKLEQSEESLK---ESDAKFTKTND-----ELDKV-----              | 1283 |
| XP_019634543.1[B.belcheri]  | QQCSTLQRELGEAAHSSQQLLENNALQCSQQQ-----EMAKEKSYRQKVEAMQHFEEQ   | 1681 |
| XP_032819484.1[P.marinus]   | -----DTAPPKGVN--AALKALQDLETTDIQEMSSP-----                    | 1411 |
| XP_045580741.1[S.salar]     | GSMAELRAQAE--SRESGQRQLD--ALLLEKERLTGHQVLEMKCSAAQRLAVAL--EE   | 1908 |
| XP_018103294.2[X.laavis]    | EQVQE-----LN--KQLRQKEKTL-----SQQKRLKQR-----                  | 1701 |
| CBN80053.1[G.gallus]        | KQVEE-----LN--KKLVQHEKATR-----SQQQRVKVL-----                 | 1588 |
| NP_001390473.1[M.musculus]  | KQVEE-----LS--KKLTEHDQASK-----VQQQKLKAFQA--Q--               | 1574 |
| Q14980[H.sapiens]           | KQVEE-----LS--KKLADSDQASK-----VQQQKLKAVQA--Q--               | 1578 |
| XP_002822235.1[P.abelii]    | KQVEE-----LS--KKLVESDQASK-----VQQQKLKAVQA--Q--               | 1578 |
|                             | : : :                                                        |      |
| XP_032223093.1[N.vectensis] | ---KKALETTQESWKEKETEMAAKLAQSEQLCEDMKDD-----Q-----            | 1319 |
| XP_019634543.1[B.belcheri]  | LRGLKELQGAEEVQKQGNMLEEQKMSQSQQQLSEQLHSYQMHYQRKKTETIDLEKSL    | 1741 |
| XP_032819484.1[P.marinus]   | ---GA--TEDRKARSEIRRENVNSSFDQEKGHLEKNALEKGENFREDDIMAAEMEENL   | 1468 |
| XP_045580741.1[S.salar]     | LALL--REQMEGTEMEKQIRDLREQLAANTEVVEHYKTVQVEKASHYSKKQQLVSEQEV  | 1967 |
| XP_018103294.2[X.laavis]    | ---EG--ETHEEAETHKRVIELESQLEQQTQAVEHYKQMEKAKVHYDAKKQNQELSDEL  | 1758 |
| CBN80053.1[G.gallus]        | ---EG--ELQSEATRQQERVALEELQAEQQAEEHYKQMEKAKTHYDAKKQNQQLAEKL   | 1645 |
| NP_001390473.1[M.musculus]  | ---RG--ESQEQVQRLQTLNELQAQLSQKEQAAEHYKLQMEKAKTHYDAKKQNQQLQEQL | 1631 |
| Q14980[H.sapiens]           | ---GG--ESQQAQRLQAQLNELQAQLSQKEQAAEHYKLQMEKAKTHYDAKKQNQQLQEQL | 1635 |
| XP_002822235.1[P.abelii]    | ---GG--ESQQAQRLQAQLNELQAQLSQKEQAAEHYKLQMEKAKTHYDAKKQNQQLQEQL | 1635 |
|                             | : : : : :                                                    |      |
| XP_032223093.1[N.vectensis] | -----ELLERLQDEIARKMEEQVNV--LNEEKGLLEEQLLEEQDTNKR             | 1359 |
| XP_019634543.1[B.belcheri]  | QKQENAHESVKNLQLTQVQERNKLKKNSS-----LSTDVKTAEIKLEKEEATTKK      | 1792 |
| XP_032819484.1[P.marinus]   | D-----TIM-----QYE--VSTDVARSIVTETGMAPSNTIFTKEECAT             | 1505 |
| XP_045580741.1[S.salar]     | T-----ELQRSLEVRHEHVNAVTTMEKL--LQKELEK-----ARNKEKS            | 2004 |
| XP_018103294.2[X.laavis]    | Q-----SHIREQEHRLKRENAIDLKAESEQ--LSKELQHSLLQSKEAEQCNKN        | 1802 |
| CBN80053.1[G.gallus]        | -----KAMEQLQKENALRTESER--LAKELQSVLQAKAEALSCE                 | 1685 |
| NP_001390473.1[M.musculus]  | -----QDLEELQKENKELRSEAEER--LGRELQAQGLKTKKAEQTCTRH            | 1671 |
| Q14980[H.sapiens]           | -----RSLEQLQKENKELRAEAEER--LGHELQAQGLKTKKAEQTCTRH            | 1675 |
| XP_002822235.1[P.abelii]    | -----RSLEQLQKENKELRAEAEER--LGHELQAQGLKTKKAEQTCTRH            | 1675 |
|                             | : * : :                                                      |      |
| XP_032223093.1[N.vectensis] | LGMQVNSLEAQVKHADMTIREQKAKMQSFENQS--EKVKK--TR-----            | 1399 |
| XP_019634543.1[B.belcheri]  | LYQQVRSLEAQVDLANRQLRQKQHVSPATPA-----RSLNTSTD                 | 1833 |
| XP_032819484.1[P.marinus]   | LQANVSEIED-----                                              | 1515 |
| XP_045580741.1[S.salar]     | LSSKVNTELAQLAFTDRHLREQSQVRPERGGIETKMRGGRESVYLKVPQSQTHQETSGD  | 2064 |
| XP_018103294.2[X.laavis]    | LSNRVRSLEAQVEYSDRQLQDLGKFQLATDS-----TKRRDTFCVPRETRSHADVSID   | 1855 |
| CBN80053.1[G.gallus]        | LSGVRSLETLQLEFADQQLRELKGFPAKPAT-----LKEPESTRFN-----PSDLSTD   | 1733 |
| NP_001390473.1[M.musculus]  | LTAQVRSLEAQVAHADQQLRDLGKFQVATDA-----LKSREPQVKP-----QLDLSID   | 1719 |
| Q14980[H.sapiens]           | LTAQVRSLEAQVAHADQQLRDLGKFQVATDA-----LKSREPQAKP-----QLDLSID   | 1723 |
| XP_002822235.1[P.abelii]    | LTAQVRSLEAQVAHADQQLRDLGKFQVATDA-----LKSREPQAKP-----QLDLSID   | 1723 |
|                             | * * * :                                                      |      |
| XP_032223093.1[N.vectensis] | KMLIEVEKVLVPVQEAQELLDESTTESDD--SEMR-----V----DDLKLTRQGS      | 1442 |



|                             |                                                               |      |
|-----------------------------|---------------------------------------------------------------|------|
| XP_019634543.1[B.belcheri]  | SIETDAETFDLEPRSRQRHS---TSRDDLDRTLSNSQVAGEEEDKKNRTISTDSLEGD    | 1890 |
| XP_032819484.1[P.marinus]   | HPNTGVENTRILSKENLEQTP---SEDG---R-RHSMVT-----RSARKRSSRY        | 1557 |
| XP_045580741.1[S.salar]     | SLDLSLDDSLNNTTRPLGPDE---SS-----TPLVRSSERV---AAKRRALGGE        | 2107 |
| XP_018103294.2[X.laavis]    | SLDLSFEEDQLLNSTSKNGRC---NQEP---A-TSSVHASSLDSP---ASSQLPKKVE    | 1903 |
| CBN80053.1[G.gallus]        | SLDLSLDEGQPLNSTRKATRS---HSDG---SAAPGTEPR---ASQRLPRKVE         | 1778 |
| NP_001390473.1[M.musculus]  | SLDLSLEEGTPCSVASKLPRT---QPDG---TVVGPGEFASP---ISQRLPPKVE       | 1764 |
| Q14980[H.sapiens]           | SLDLSCEEGLPLSITSKLPRT---QPDG---TVVGPGEFASP---ISQRLPPKVE       | 1768 |
| XP_002822235.1[P.abelii]    | SLDLSCEEGLPLSITSKLPRT---QPDG---TVVGPGEFASP---ISQRLPPKVE       | 1768 |
|                             | : :.                                                          |      |
| XP_032223093.1[N.vectensis] | ---SVSFASVNGTD-----FGKSLSTSSISRTSL-----                       | 1469 |
| XP_019634543.1[B.belcheri]  | SLDTSIFS-----RTSQDSGMSTR---SQRRRTTVSIEMV                      | 1922 |
| XP_032819484.1[P.marinus]   | SQETLYFTPLQTRPSLVGGQAPALDWSLNSLEDLVDSAKKKPR-TSSTRRTTHVIDIT    | 1616 |
| XP_045580741.1[S.salar]     | SLETLFTPMNNRQINRTSTERRLESSITCLGELALDSARKRPPPTSSARRRTTQVINIT   | 2167 |
| XP_018103294.2[X.laavis]    | SLESLYFTPIPTRA-----QSKLESSIGSGLDLSLDSKKTTR---SARRRTTQIINIT    | 1953 |
| CBN80053.1[G.gallus]        | SLESLYFTPIASRT-----QPKLESSAGSLADVLESgcRTR---SRRRTTQIINIT      | 1828 |
| NP_001390473.1[M.musculus]  | SLESLYFTTTPARG-----QAPLETSLDLSGLDAFPDsgRKTTR---SARRRTTQIINIT  | 1814 |
| Q14980[H.sapiens]           | SLESLYFTTPIPARS-----QAPLESSLDSLGDVFLDsgRKTTR---SARRRTTQIINIT  | 1818 |
| XP_002822235.1[P.abelii]    | SLESLYFTTPIPARS-----QAPLESSLDSLGDVFLDsgRKTTR---SARRRTTQIINIT  | 1818 |
|                             | : *                                                           |      |
| XP_032223093.1[N.vectensis] | ---EDSRRL-----RSTVRPSA-----                                   | 1477 |
| XP_019634543.1[B.belcheri]  | QT---EDSRRL-----                                              | 1930 |
| XP_032819484.1[P.marinus]   | LNKVKVSCRDSVSSSASTMRSTTTAYELRSHGDRPTPVQSSNWSLGFPPASSASFTLD    | 1676 |
| XP_045580741.1[S.salar]     | MSKTTTPGRGGAGGDS---NEMFYSLSSVRSHPNITGSTH---TARPIS-----        | 2210 |
| XP_018103294.2[X.laavis]    | MTKTKTEERE---PESA-----NTSFYSLRAPSQNLHQQNPRAARPAQAISTPALA      | 2004 |
| CBN80053.1[G.gallus]        | MTKTKETTEE---PGQA-----DASFSSILSEGPQKAAPAKAR-----LRASRLA       | 1871 |
| NP_001390473.1[M.musculus]  | MTYKLEL-EE---PDSA-----NSSFYSTQSAPAS---QAN-----LRAT----        | 1847 |
| Q14980[H.sapiens]           | MTYKLDV-EE---PDSA-----NSSFYSTRSAPAS---QAS-----LRAT----        | 1851 |
| XP_002822235.1[P.abelii]    | MTYKLDV-EE---PDSA-----NSSFYSTRSAPAS---QAS-----LRAT----        | 1851 |
|                             |                                                               |      |
| XP_032223093.1[N.vectensis] | -----SRQSAMVVKGSTPPTRRTTSSA-----AFFIVG                        | 1506 |
| XP_019634543.1[B.belcheri]  | -----SRTSTEHDVLGSS-----IGSASSWRGAAP                           | 1955 |
| XP_032819484.1[P.marinus]   | TFTQNSLQLEDMR---SGRLSDASLRLSLPGYRPLGPHGTGDRNLEQLQAPPTTRRRKGNA | 1734 |
| XP_045580741.1[S.salar]     | -----MEVFHTPGKPAVAVDQLLSLPGYRSTVHV-----AAPQSTG                | 2248 |
| XP_018103294.2[X.laavis]    | SLPQESLAKTEHFSDDSLNNSVLMNLPGYRAPARRSSRLSQ-----T-----GGRS      | 2052 |
| CBN80053.1[G.gallus]        | SFPQDSLSKLDTSPPQEPSPGHAALLSLPGYRPTATRSSLRKS---AGSSS---SLGRS   | 1924 |
| NP_001390473.1[M.musculus]  | ---SSTQSLARLG---SPDDGNSALLSLPGYRPTTRSSARRSQ---ARMSSGAPQGRN    | 1896 |
| Q14980[H.sapiens]           | ---SSTQSLARLG---SPDYGNSALLSLPGYRPTTRSSARRSQ---AGVSSGAPPGRN    | 1900 |
| XP_002822235.1[P.abelii]    | ---SSTQSLARLG---SPDYGNSALLSLPGYRPTTRSSARRSQ---AGVSSGAPPGRN    | 1900 |
|                             |                                                               |      |
| XP_032223093.1[N.vectensis] | DEFANNMEQSEYEFPDWD-----                                       | 1524 |
| XP_019634543.1[B.belcheri]  | RFFVSECEEBEQ-YDWD-----                                        | 1972 |
| XP_032819484.1[P.marinus]   | SYVM-SCVDEPDPEAEWDELERQGLGAHALPRRQFPAALGTSACYTEGLQENQPPVNCV   | 1793 |
| XP_045580741.1[S.salar]     | QFCVGAENEPDHAADDWL-----                                       | 2266 |
| XP_018103294.2[X.laavis]    | SFYMSTCQDEPDQDEWT-----                                        | 2070 |
| CBN80053.1[G.gallus]        | SIYLGTCQDEPEQLDDWN-----                                       | 1942 |
| NP_001390473.1[M.musculus]  | SFYMGTQDEPEQLDDWN-----                                        | 1914 |
| Q14980[H.sapiens]           | SFYMGTQDEPEQLDDWN-----                                        | 1918 |
| XP_002822235.1[P.abelii]    | SFYMGTQDEPEQLDDWN-----                                        | 1918 |
|                             | : . *                                                         |      |
| XP_032223093.1[N.vectensis] | -----RLAELERRNTICPHLKTSPVETQTRPSEGNGLHAARSETALTRK             | 1570 |
| XP_019634543.1[B.belcheri]  | -----RLSELQRRNTLQPRHLQSCYPTETQGTALAE-----T                    | 2004 |
| XP_032819484.1[P.marinus]   | DFSEKSDTRNDHLLRQEELGKRNQATLPHLRKSPYPLKVETP-----MPGEDLC---T    | 1842 |
| XP_045580741.1[S.salar]     | -----RIAEQARNQSCPLHLKSSYPLESRPSLGSPFEFTDDDLR---M              | 2307 |
| XP_018103294.2[X.laavis]    | -----RIAEQARNKTCPPHLKTSYPLESKPSLFS--TLTDEEVK-----L            | 2110 |
| CBN80053.1[G.gallus]        | -----RIAEQQRNRACPPHLKTCYPLESRPSDLVG-TITDEEMK-----T            | 1982 |
| NP_001390473.1[M.musculus]  | -----RIAEQQRNRVCPPHLKTCTYPLESRPTLSLA-TITDEEMK-----T           | 1954 |
| Q14980[H.sapiens]           | -----RIAEQQRNRVCPPHLKTCTYPLESRPSLSLG-TITDEEMK-----T           | 1958 |
| XP_002822235.1[P.abelii]    | -----RIAEQQRNRVCPPHLKTCTYPLESRPSLSLG-TITDEEMK-----T           | 1958 |
|                             | * ** *                                                        |      |
| XP_032223093.1[N.vectensis] | RKPEDTLTSS-----VKERKDMTTSKS-EQGIKR-----SRSKRITDMVSSK----      | 1611 |
| XP_019634543.1[B.belcheri]  | EDLSKTLRRTTLRSSQAAKTFSITPGKKRRHEADENSA-----SRKKTVMVMPSTPS---- | 2055 |
| XP_032819484.1[P.marinus]   | AKPEMTARRMFLRPALADANADM-----                                  | 1865 |
| XP_045580741.1[S.salar]     | GDPTETIRRASVMPQIQESLSHRLSLHPGQADSTTASRPAYGSHRLSLMPFKPASST     | 2367 |
| XP_018103294.2[X.laavis]    | GDPKETLRRATMLPSQIQDSTTSTRLLTLAGSGAEH-----LKHGISTRQQ-----      | 2157 |
| CBN80053.1[G.gallus]        | GDPTETLRRASMQPLQIAEGAATRRG-TLG---GG-----WAHGGITRQQ-----       | 2024 |
| NP_001390473.1[M.musculus]  | GDPRETLRRASMQPIQIAEGV-----GITTTRQQ-----                       | 1982 |
| Q14980[H.sapiens]           | GDQPETLRRASMQPIQIAEGT-----GITTTRQQ-----                       | 1986 |
| XP_002822235.1[P.abelii]    | GDQPETLRRASMQPIQIAEGT-----GITTTRQQ-----                       | 1986 |
|                             | . *                                                           |      |
| XP_032223093.1[N.vectensis] | -----INSLRPSKSNENIKEQKQ---SGNSLAFEI---TPPKKR--                | 1644 |
| XP_019634543.1[B.belcheri]  | -----K-RTPSVFKTPKKIASAAAGIFKKPTGKTPSSRRRS                     | 2089 |
| XP_032819484.1[P.marinus]   | -----RKRKSGIGHNTEC-SPE---SKK---SATMCFVVA---TPPREP--           | 1900 |
| XP_045580741.1[S.salar]     | LNQNTNHLNRLGNSLSKRSKQJEPD-TPEVMEAKR---KATSCFPRL---TPKGGR--    | 2419 |
| XP_018103294.2[X.laavis]    | -----MKRVSESHYGPD-TPEQ---K---MTATCFPRM---TPKDKH--             | 2191 |
| CBN80053.1[G.gallus]        | -----RKRKLSDESHQGD-TPEQ---K---KPVSCFPRQ---TPRER--             | 2058 |
| NP_001390473.1[M.musculus]  | -----RKRVSSETHQGP-TPEQ---K---KATSCFPRM---TPDRH--              | 2016 |
| Q14980[H.sapiens]           | -----RKRVSLEPHQGP-TPEQ---K---KATSCFPRM---TPDRH--              | 2020 |
| XP_002822235.1[P.abelii]    | -----RKRVSLEPHQGP-TPEQ---K---KATSCFPRM---TPDRH--              | 2020 |
|                             | : . :                                                         |      |
| XP_032223093.1[N.vectensis] | -----KAEPKAASDTPPRESTKKTVAFTIENSPPKKCKVQR---TRTI              | 1686 |
| XP_019634543.1[B.belcheri]  | PRLQGRGKSPAGRLNKAKTPTKTPNKHQAKQDPRQSIAPNIGFSLKGRKSA--RKAK     | 2147 |
| XP_032819484.1[P.marinus]   | -----PPRASPRRDDH---PQRSWPIIRR-----LRQSM                       | 1926 |
| XP_045580741.1[S.salar]     | -----FSSS-----NNRQPPSPAERRQSMVFSIDNTPRKAASKSGFLQRM            | 2460 |
| XP_018103294.2[X.laavis]    | -----DARRLSTMESK-ASSSHQVQPTRRQTSAFSIFNTPKKLGS---SLLKRGL       | 2238 |
| CBN80053.1[G.gallus]        | -----SSHLSRR---SEQQAPSQKQPERQSMAFSILANTPKKLGN---SLLRRAA       | 2101 |
| NP_001390473.1[M.musculus]  | -----EGRKQSTADTQKKAAPVLKQADRQSMAFSILANTPKKLGN---SLLRRAA       | 2064 |
| Q14980[H.sapiens]           | -----EGRKQSTTEAQKKAAPASTQADRQSMAFSILANTPKKLGN---SLLRRAA       | 2068 |
| XP_002822235.1[P.abelii]    | -----EGRKQSTTEAQKKAAPASTQADRQSMAFSILANTPKKLGN---SLLRRAA       | 2068 |
|                             | :: :                                                          |      |
| XP_032223093.1[N.vectensis] | NRSTATTO-----LV---RDKDRETFKREKLTENRILPRSSNRKIAK-----          | 1727 |
| XP_019634543.1[B.belcheri]  | EKREA---QKEPSQRRMSI---ANVKSF-LSV-----NNSKT-NKTKAARKPLGTRNA    | 2193 |
| XP_032819484.1[P.marinus]   | SKRKSPPSKASKP-----                                            | 1939 |
| XP_045580741.1[S.salar]     | NKIRSSTRKSPAN-KISRVPRSGDVKSPO---PGGKAQRKSPRT-NSSKSPKNFTSARKEP | 2516 |
| XP_018103294.2[X.laavis]    | NKKTTPKN-SPRGRGTNNSASSTSSKSPHLSLRKSPSRKSPRV-STAKSPKASNKV-GQ   | 2294 |
| CBN80053.1[G.gallus]        | NKKTTPKN-SP-RGTAR-----RSPRI-ASTKSPKGAKGRALK                   | 2137 |
| NP_001390473.1[M.musculus]  | SKKTPAKV-SPNPRSGTR-----RSPRI-ATTTTGTA---TVATT                 | 2099 |
| Q14980[H.sapiens]           | SKKALSKA-SPNTRSGTR-----RSPRI-ATTTASAATAAIGAT                  | 2106 |
| XP_002822235.1[P.abelii]    | SKKALSKA-SPNTRSGTR-----RSPRI-ATTTASAATAAIGAT                  | 2105 |
|                             | . :                                                           |      |
| XP_032223093.1[N.vectensis] | -----                                                         | 1727 |
| XP_019634543.1[B.belcheri]  | QTGV-----                                                     | 2197 |
| XP_032819484.1[P.marinus]   | -----                                                         | 1939 |
| XP_045580741.1[S.salar]     | EVLVGKPIHLR-----                                              | 2528 |
| XP_018103294.2[X.laavis]    | -----EEQIQFFERKQQRNK                                          | 2309 |

|                            |                |      |
|----------------------------|----------------|------|
| CBN80053.1[G.gallus]       | D-----TKF----- | 2141 |
| NP_001390473.1[M.musculus] | PRAKGKVKH----- | 2108 |
| Q14980[H.sapiens]          | PRAKGKAKH----- | 2115 |
| XP_002822235.1[P.abelii]   | PRAKGKAKH----- | 2114 |
