# Supplementary material for: An Evolutionary Perspective on the Origin, Conservation and Binding Partner Acquisition of Tankyrases
Source: MDPI journal article supplement (doi:10.3390/biom12111688), 2022-11-15
Supplement: s1 [file s1]

# IRAP

## Homo sapiens:

```
>sp|Q9UIQ6|LCAP_HUMAN
MEPFTNDRLQLPRNMIENSMFEEEPDVVDLAKEPCLHPLEPDEVEYEPGRSRLLVRLGLGE
HEMEDEEEDYESSAKLLGMSFMNRSSGLRNSATGYRQVQDGFCSVPSARTMVVCAFVIVV
AVSVIMVIYLLPRCTFTTKEGCHKKNQSIGLIQPFATNGKLFPAWQIRLPTAVVPLRYELS
LHPNLTSMTFRGSVTISVQALQVTWNIILHSTGHNISRVTFMSAVSSQEQAEILEYAYH
GQIAIVAPEALLAGHNYTLKIEYSANISSSYGYFGFSYTTDESNEKKYFAATQFEPLAAR
SAFFPCFDEPAFKATFIIRIIRDEQYITALSNMPKKSSVVLDDGLVQDEFSESVKMSTYLVA
FIVGEMKNLSQDVNGTLVSIYAVPEKIGQVHYALETTVKLLLEFFQNYFEIQYPLKKLDLV
AIPDPEAGAMENWGCLLTFRETTLLYDSNTSSMADRKLVTKIIAHELAHQWFGNLVTMKMW
NDLWLNREGFATFMEYFSLEKIFKELSSYEDFLDARFKTMKSDLSNSHPISSSVQSSEQI
EEMFDSLSYFKGASLLMLKTYLSEDEVFQHAVILYLHNHSYASIQSDDLWDSFNEVTNQTL
LDVKRMKMTWTLQKGFPPLVTVQKKGKELFIQOERFFLNMKPEIQSPDTSYLWHIPLSYVT
EGRNYSKYQSVSLDDKKSQGVINLTEEVLWVKVINNMNGYYIVHYADDWEALIHQLKINP
VYLSDKDRANLINNIFELAGLGKVPKRAFDLINYLGNENHTAPITEALFQTDLIYNLLE
KLGYMDLASRLVTRVFKLLQNQIQOQTWTDGTPSMRELRSALLEFACIHNLCNSTTAM
KLFFDDWASNGTQSLPTDVMTTVFKVGAKTDKGSFLLGKYSIGSEAEKNKILEALASS
EDVRKLYWLMKSSLNGDNFRTQKLSFIIRTVGRHFFGHLAWDFVKENWNKLVQKFPLGS
YTIQNIVAGSYTLFSTKTHLSEVQAFENQSEATFRLRCVQEALEVIQLNIQWMEKNLKS
LTWWL
```

## Pongo abelii:

```
>XP_024102718.1 leucyl-cystinyl aminopeptidase [Pongo abelii]
MEPFTNDRLQLPRNMIENSMFEEEPDVVDLAKEPCLHPLEPDEVEYEPGRSRLLVRLGLGEHEMEDEEEDY
ESSAKLLGMSFMNRSSGLRNSATGYRQVQDGFCSVPSARTMVVCAFVIVVAVSVIMVIYLLPRCTFTTKEG
CHKKNQSIGLIQPFATNGKLFPAWQIRLPTAIVPLHYELNLHPNLTSMTFRGSVTISVQALQVTWNIILH
STGHNISRVTFMSAVSSQEQVEILEYAYHGQIAIVAPEALLAGHNYTLKIEYSANMSRSYGYFGFSYTT
DESNEKKYFAATQFEPLAARSAPFCFDEPAFKATFIIRIIRDEQYTTLSNMPKKSSVILEDGLVQDEFYE
SVKMSSTYLVAIFVGEMKNLSQDVNGTLVSIYAVPEKIGQVHYALETTVKLLLEFFQNYFEIQYPLKKLDLV
AIPDPEAGAMENWGCLLTFRETTLLYDNNTSSVADRKLVTKIIAHELAHQWFGNLVTMKWMDLWLNREGFA
TFMEYFSLEKIFKELSSYEDFLDARFKTMKSDLSNSHPISSSVQSSEQIEMFDSLSYFKGASLLMLK
TYLSEDEVFQHAVILYLHNHSYASIQSDDLWDSFNEVTNQTLDVKKRMKMTWTLQKGFPPLVTVQKKGKELFI
QOERFFLNMKPEIQSPDTSYLWHIPLSYVTEGRNYSKYQSVSLDDKKSQGVINLTEEVLWVKVINNMNGYY
IVHYADDWEALIHQLKINPYYLSDKDRANLINNIFELAGLGKVPKRAFDLINYLGNENHTAPITEALF
QTDLIYNLLEKLGYMDLASRLVTRVFKLLQNQIQOQTWTDGTPSMRELRSALLEFACIHNLCNSTTAM
KLFFDDWASNGTQSLPTDVMTTVFKVGAKTDKGSFLLGKYSIGSEAEKNKILEALASSEDVRKLYWLM
KSSLNGDNFRTQKLSFIIRTVSRHFFGHLAWDFVKENWNKLVQKFHLGSYTIQNIVAGSYTLFSTKTHL
SEVQAFENQSEATFRLRCVQEALEVIQLNIQWMEKNLRSLTWWL
```

## Mus musculus:

```
>NP_766415.1 leucyl-cystinyl aminopeptidase [Mus musculus]
MEPFTNDRLQLPRNMIENSMFEEEPDVVDLAKEPCLHPLEPDEVEYEPGRSRLLVRLGLGEHEMDEEEDY
ESSAKLLGMSFMNRSSGLRNSAAGYRQVQDGFCSLPSARTLVICVFVIVVAVSVIMVIYLLPRCTFTTKEG
CHKNTQSAELIQPVATNGKVFPAWQIRLPTAIIPLCYELSLHPNLTSMTFRGSVTISLQALQDTRDIIILH
STGHNISRVTFMSAVSSQEQVEILEYFYHEQIAVVAPEPLLTGHNYTLKIEYSANISNSYGYGITYTT
DKSNEKKYFAATQFEPLAARSAPFCFDEPAFKATFIIRITRNEHHTALSNMPKKSSVPAEEGLIQDEFSE
SVKMSSTYLVAIFVGEMKNLSQDVNGTLVSIYAVPEKIGQVHYALETTVKLLLEFFQNYFEIQYPLKKLDLV
AIPDPEAGAMENWGCLLTFRETTLLYDNNTSSVADRKLVTKIIAHELAHQWFGNLVTMKWMDLWLNREGFA
TFMEYFSLEKIFKELSSYEDFLDARFKTMKSDLSNSHPISSSVQSSEQIEMFDSLSYFKGASLLMLK
SYLSEDEVFQHAVILYLHNHSYAAIQSDDLWDSFNEVTQTKLDVKKRMKMTWTLQKGFPPLVTVQKKGTRELL
QOERFFLRMQPESQPSDTSHLWHIPLSYVTDGRNYSYRSVSLDDKKSQDVINLTEQVQWVKVNSNMNGYY
IVHYADDWTALINQLKRNPPVLSDKDRANLINNIFELAGLGKVPPLRMADFLLIDYLNKNEHTAPITEALF
QTNLIYNLLEKLGHMDLSRLVARVHKLLQNQIQOQTWTDGTPSMRELRSALLEFACAHSENCTTMTAT
NLFDDSWASNGTQSLPTDVMTTVFKVGARTKGWFLFSMYSSMGSEAEKNKILEALASSEDVHKLYWLM
KSSLGDGIIRITQKLSLIIRTVGRHFFGHLAWDFVKENWNKLVHKFHLGSYTIQSIIVAGSTHLFSTKTHL
SEVQAFENQSEATKLRCVQEALEVIQLNIQWVMVNLKLTLSQWL
```

## Gallus gallus:

```
>XP_424862.3 leucyl-cystinyl aminopeptidase isoform X1 [Gallus gallus]
MEPFFPSDQQLPRNMIENSMFEEEPDVVDLAKEPCLHPLEPDEVEYEPTRSRLLVRLGLGEHEMDDDEEDYE
ESSAKLLGMSFINRSSGLRNNMSVYRQVQDGFCVPSTRTMLICTGVLIIVAVSVIMVIYLLPKCTFTTKEG
CHKKNRMELIYPLATNGKLFPAWAKIRLPSDVPLHYDLDLQPNLTLTKFTGSKVIVNVNTQVTKKIVLH
SSGLNITKATITSTGGSQEKAVELLEYPPLHDQIAVMAPESLLAGQNTVTNLEYSSNLSDTYYGYFRVSYK
DENSKRWFAATQFEPLAARSAPFCFDEPAFKATFSIRIKRDEKISLTLSNMPKAKTSPVTKGLVQDEFSTV
SLKMSSTYLVAIFVQADLNISMETNGSLSVYHAIQHIINQVEYALNTAVKLLLEFYEKYFLINYLEKLDLV
AIPDPOSGAMENWGCLLTFRETTLLFDNNASSARDKKLITAVIAHELAHQWFGNLVTMEWMDLWLNREGFA
TFMEYFAMEEIFFELHSDDEFLNLIFFKMMKSDLSNSHPVSSAVQSSEQIEMFDALSYIKGASLLMLK
HYLTKDVFQAGIEIYLNHHKYGSAQSDDLWDSMNEITNGTLDVKKLMKTWILHKGFPPLVTVNRKGIISL
HQEKFLYSVEPDNWTSDTSYLWDIPLTYTTNRCNFTHCINAYLLDQKSVAVIEPVEVEMIKFNVMNGYY
IVNYDEDWETLIDLLKKNHTALSADKDRANLINNIFLASLGKEPLKAFELIDYLKEESSTAPLSQALFQ
LGLIFGLLEKRGEQQLAARVMYRIECLLGNKIQDQNWTDGTTISERELRSMLLTFACIHDIRNCRATAASK
MFEDEWMSKNGTMSLPSDLMKAFITGAKTNDGWFLFKMYSSPVPEAEKSKMIEALASTEDVRKMMWLMQ
NLSLEGEVIRTQELSHIATISHSLPGHLLAWDFVKENWEKLTFRKFHLGSYTIQNIISSSTSQFATKVHLL
EVTTFEKSRESSSKRCVKEADITIQLNIQWMETNLAKLQEWL
```

## Xenopus laevis:

```
>NP_001088429.1 leucyl/cystinyl aminopeptidase L homeolog [Xenopus laevis]
METSDNWAQLPRNMIENSMFEEEPDVVDLAKEPTMNPLESEETEYEPRSSRLLVRLGLGEQELDEEEDYE
SSAKLLGMSFMNRSSGLRNSAANYRQVQDGFCVPVSARTVIVCVVVVIVAVSVVTVVYLLPKCTFTTKDGC
HEKKHPLVLVYPIATNKKVPFWAKSKRLPDSIKPVHYTLTMHPNMNTLSFTGTQVIKLNIITTSKNIVLHS
SGLHIIKASVLVNGGTTMADEVLEYYPFEEIAIISPESSLKGECCLLTIQYAAANFSSTYYGYKIDYMK
SNKRSJAATQFEPLAARAKAFPCFDEPAFKATFSQINIIRNDEMSISLTNSMPKAKTSPVTKGLVQDEFSTV
SLKMSSTYLVAIFVQADLNISMETNGSLSVYHAIQHIINQVEYALNTAVKLLLEFYEKYFLINYLEKLDLV
AIPDPOSGAMENWGCLLTFRETTLLYKENSSTIEDQKSLITTVIAHELAHQWFGNLVTMEWMDLWLNREGFA
TFMEYFSVSVFPELNSDNSFLKMRPMALQKSDLSNSHPISDVRSPEQIEMFDDL SYIKGASILLMLKSL
LLEDVFHLICIRGYLKSHEYGSTTSDSLWDSLVNVTGGPNPNVKNMKMTWTQKAGYPLVTALRKGEIITVRQ
ERFLRSDSHATNDSTVWHIPLTYVTGKDAVEPDCEKIHLLKEATGTINVSELPPVVKFNVMNTGYIYVD
YGADGDWALIEQLHRDYTVLHSSDRANLIHDI FMLJAGVGKVPKLSAKFELLGYLVNETDSAPITQALHOFY
HIGLILKRGDLLDSDKLMEHGLELLNNTLIKQTMWDEGTLAERQLRSLLDFACSNFFPSCLEKATELF
NSWRNVNKTPIPTDMVKVVFVGARTTEGWTLLRSTYDSSIYAEKRKIILEALASTDNAKNLQWLQWQESLD
GGSIRSQELPAVIGFICKRSPGYLLAWNFIKQNDLITQKFMPSGFFIQINIVSKTHHQFSTDVHLNEVIA
FFNSTQEKSRREMVCVEAVETIKLINIEWMKNNFDSLKTWLLPSQ
```

**Salmo salar:**

>XP\_014016586.1 PREDICTED: leucyl-cystinyl aminopeptidase isoform X1 [Salmo salar]  
MEDPFDSEERASLPNRMNIENSMFEEDPDVVDLAKDSAAFPALPEDEVVVEPRSSRLLVRLGENDLDDDEEE  
DYESSARLLGMSFMNRSSSTHNPSSSPYNRQAPPRSCSCPSARMLVVGVFILVLVASMAMVLYFLPGCTFT  
KAGCGKANSSPTMPEPSYPNSTNGELFPWNELRLPASVRFVNYDLSLTPNLTSMTFTGRTVINMTILHNHTK  
HVVLHSSSELIITKATTFQVGEKGSVEVKVLEYKPMWQQIAVSFFEDLKVGQVCVLTLDYAAASLSHTYDGFYN  
SSYNOKTGAKRVLAATQFEPQAARKAPCFDEPAFKATFLVRITREPGYITLSNMPQAKTTTLPSGLLED  
EFEGQATVMSTYLVAFIVANFTSITRNVSNLTLYSVSVPEKKHEHTHALDTSKLLHFNYPNPFKINYPFLA  
KLDLVAIPDFLAGAMENWGLITFRETSLLVGNQSSPLDKQLLIANVVAHELAHQWFGNLTVMRWNDLWLN  
EGFATYWQYMSLMTFEPQLDLGNVFLGVRFKAMAKDSLNSSHPVSVSSQVTTPEQVSEMFDSVTEKGRAS  
LLMLINSTTLPDGQFKEGLMKMYLDTYRGSNTVTEDLWNSLTQAQVLPQQENVSDDMRWTWTLQKGFPLVTVS  
RKGGHVTLTQEHPLLSADNTHTSLSLWHPIVTVYNDSGCCSAPSCRQIFMLRNKTATLNVSDSVKWLKLNY  
MNTGPFYIVHYGDEGWTTLDALKTDINTLTAHDRASLIHNIFFSLRSLGRVSFRQVLNLLDYATNETETAP  
LTALSLQSLSSVYRLDDRQEQTLVARMKAYTWGHFGQLMDSQDWGEEESVSRQELRSALLEMACSLGRQN  
CTDQATALYDQWNTSNQTKQIPGDLQRVVSVAQSNLGLWSLMEAYSYTTYDSEKRRKILQALASTQDQP  
SIVWILSTGLEGGIIQTQELPLVISTMSDGFAGHLFVWDFVKENWDKIEKFFVGSYPIQSIIKSTTSQF  
STQTHLEEVGGFFSSLKERGSQMRSVQEALETIRLNQLWMDRNLPTLRIWL

**Petromyzon marinus:**

>XP\_032824577.1 endoplasmic reticulum aminopeptidase 1-like isoform X3 [Petromyzon marinus]  
MAGDLHGERAPLPKHMNIENSMFEDDDEEEDEEADAGMPNVDPGADPSLGNVALSSPRTLAASSVPLYT  
QHPLISSGGGSADRPAPEDDSRPHTLSRLPIYAGDPDEFDEDFDDNEESSRRLGAAPFNRPDPPEFRS  
GRGGGPG**AAAPSTGPG**-SDGPGVHLCCQQMSPRTLMFCAAGAIGTVVIGIALSYVPCALGIGNGCASSNS  
SAAGDDHHRGGTTFPSGAGNATFPFTADGEVFPWADDRLPRSVRPLHYHLCLHPNLTTLAVEGYVSVWLL  
VDESTHVVYLHANLITITESILVPAADGAPAGGADGSLVAKLLRYEPRDQLMVCVTRKPLTQCGMILLNIT  
FTGRLSNTEFLSARVFCDESDRFLSARSEFPFCDESDFKASFDISIVRDAHHTLSNMP  
LNETVTRKDGILLDTFFKGSVMSTYLVAFIVSDFKSISNKTKHGTNVSITYTSPGKEQQGSFALENAIKFL  
DYEELFNISYPLPKQDLVAIPDFAAGAMENWGLVITYRETALLGPKASGVDRDLWAQVIAHELAHQWF  
GNLVMTMNWNDLWLNEGFATFMEFVATGSLPKDWLMDMDFLTEVVMALTQDSLSPSSHAISAAAVGTMQI  
GEMFDSYVYKGSVLNMLRTFLTPAVFVDGIRDYLLVHSYGNHAHTDLDWESLTQSAQQHGLHGSVNVTVE  
MGTWVRQPGFPLLTTLTAVDKELKITYPKQEPFFIEPAETSIITPSLWQIPLTFITSDNSTSQSKLITDKQGD  
IATVTSKTEWIKANTMNTGFVVDYKGDGWATFANKLTTSKSFLSPADRANLLNDVFYLLNVGRVDVEDAM  
PLLSLFLPNETSVTPMKVALMHLDRLVLLILSPYAHVDQLLQKHIVKLGEBLLPRLPWNKSSEEVTPVQRSL  
DALLSVLCAYRSEKCLNRANVAYLQWSASELSADLMSVTLRVAVRDGRPTWDSVQEHYHRAKSSTEQ  
AKYLEALASTSDEDDQQWSLLENAMAGVEVRSQELPRIVGVMMARTSWTGRLLTWDFLRRKRWLLVEKFSQS  
SFALSNMVSVTSGFSSYTHLDQVEEFVASLRDSSGELRVFKEARDTIRANHWLATNRVALHKWLTEQS

**Branchiostoma belcheri:**

>XP\_019622707.1 PREDICTED: endoplasmic reticulum aminopeptidase 1-like [Branchiostoma belcheri]  
MEEQEEETDILTGPEEVAEDAEPASDEDSLPLQAVVQDGEGRKKQ**RPSSRSQPL**SWLSPRKSSAASRLP  
RGQAQRPLRKRKLWQYAPKCSRDRCCFLPAICLTIIFIVLVTSAIYMNSKHKSSCCPYSFLLDTSEKKSAKKDP  
IATNGERFRPDDVDRLPSTIVPNSYLLHLHPNLTTFNFTGHVSNISVVKKTDLVVFHVKELNITQSSVKRT  
MNVNVSPIVKELEYTGNEGICLRLQGLSAGQNYTIVVHFSGELNDGLIGPFRCTYLLNKGKGDEESRVL  
ATTFQFAANARAFRCFDEBPALKAFQALNVRGGRHSTFLPMKQKHIEDLLQGLKMDVFKGSVAMSTYLV  
CFIVSDFRSMQLSTDTSDITVAVHAPEDRISQASFALDVAKTVLEIYETTFPGVKYPLPKMDLVAIPDFSS  
GAMENWGLVITYRETALLYDADNSSAGDKQWVAIVIAHEFAHQWFGNLVMTKMNWDLWLNEGFASVFEFIG  
ADKVSPEWKMLDQFVVSDIQTALSADSLNSHPISVTVHRPEEVEEIFDISISYDKGASILRMLESFLGRE  
FTFQGLTSLYREHQFNAAATDDLWKALDQAAHGAGKSNINIKQVMDRWTNQMGYPVVMVTRQNSHLVLTD  
DRFLMQPSPACGGVVEFTSPYRYEWIILPTYITSTSPKEQQTVMFMDTTQTTLSLDNNSPEWVKFNVNQT  
GFYRVNVDNQNDAFIHQLONNHEALNSADRAGLIDDAFHLNRAGLFGLEKSLELVKYLKNERDVPVPMAT  
ALSGSLGYITKLTLETEDQDLNNMMLFVLELLEDITIGEVGWEDQGDQLTKFLRSTVLGAACYDGEHQSTQQ  
AHTLFPANMKGTQNVAAANLKTVVTYSVGVQHGESEWNFCWQYTSATVAAEKRRKLLYALANTRDNKLVTK  
LLRYTLDSTKIRSQDTRVTITYVSRVATGVQLAWNFKSNWQTFLDRYGSGSFNMAELAKIPAHRFSTRR  
QLEEVKSFTQSHDISAAARAARQTIETIQSNIFWLEKNKDKVKTWIKNYFMPPEGGKARSSEI

**Drosophila melanogaster:**

>NP\_731786.1 uncharacterized protein Dmel\_CG32473, isoform A [Drosophila melanogaster]  
MVAWLTVKSVAILFGLASTAFCVATIVLAVQNADLENDLQDALDKIDALTIVDTTSTSSTSTSTSTTTTA  
NPNGETDDTEPGSTTTTPGVGGDTTPSAGTSPGGETSPSSSTGSTTNPIYPTLPTGLPDPEKIEWRLPTEL  
TPIKYKYVYHPDLTTGACCGTVSIIQFQLNAITNLVLHAKELNVHSISILNMMARIRVAIDSNLDESRE  
LLILITLREVLSMNAKAYTLASGPDCLDSSLVGSIISNTYNAQGVDRSIIISTKFEPTIARQAQPCFDEPALK  
AQFTITVAPRSQAGTQEDBPALKAFQALNVRGGRHSTFLPMKQKHIEDLLQGLKMDVFKGSVAMSTYLV  
VYAPPAQVEKQTQYALDTAGVMAYYINYNFNVSYALPKLIDLVAIPDFVS GAMENWGLVITFRETALLYDEST  
SSSVNKRQVAIVVAHELAHQWFGNLTVMNWNLDLWLNEGFASFLEYKGVKQHPEDWMDNQFVIEELHPV  
LTDATLASHPIVKSIESPAEITEYFDTITYSKGAALVRMLENLVGEEKLRNATRYLVRHIYSTATTED  
YLTAVEEEEGLEFDVKQIMQWTWEQMLPVVEVEKSGSTYKLTQKRFLANEDDYAAEAESSFNRYRSIP  
ITYTSSINSEVQSILFNHNDNEATITLPEEASWIKINTNQGVYRVYNGSEQWAEILSALKNSRETFSTA  
DRAHLLDANTLAAAGQLNYSVALDLISYLESEQDYVPWSVGTSALATLRNRVYTYDLYTNVYTYARKLL  
TPVIEKVTFTVAADHLENRLRIKVLSSACSLGHESSILQQAVTLFNGWLASPETRPNPDIRDVVYVYGLQQ  
VNTEAAMDQVVKLYLDESDAQEKLKMLNCLTAVQVPWLLQRYINNAWDESNVRQDYFTLLGYISTNPGV  
QSLVWDVRENWEKLVDRFGINERTLGRLIPTITARFSTETKLEEMQQFFAKYPEAGAGTAARQQALEAV  
KANIKWLAANKAQGEWLANYVQQSSVTNRIQ

**Hydra vulgaris:**

>XP\_012561211.1 PREDICTED: aminopeptidase N-like [Hydra vulgaris]  
MSEASTGLLINESKNKSNKYEGSAWSQHWKLILTVGVVFLIALGVIFGVIINTDRENKLNKSKREELFFPY  
SNIRLPLNVIIPERYKIYLHPNITDNKFGFTGTVRILINITEETDSVLLHIKDLNISEVKKYHGSSAMSKH  
KGPDESQQVPVKDHLISVEHEFLMRMKQHELEVGRQYTLFIRFNGRLSNGLEGFYKSSYTTSGKEKRY  
LATTVYFEATQARAAPCFDEPALKALFELIMVREPQHTALSNMFIKTIINRTDGLKEDHFQQSLMSTYLV  
VAFPVCDYGYKSAKSTSGRIEYKVMAPKQEQIQAENFATYAAKPVLDYETFTFQVNVFPLKQDLAIIPDPA  
GAMENWGLITYRLTSILYDEKSSSANKQWAVVIAHELAHQWFGNLTVMKWNWDLWLNEGFAAPVFEFIG  
ANITEPSWQMMDQFIVDDQONSLLDSSNSHPISVTVNDPAQINEIFDTISYDKGASIIIRMMKNFLGSD  
VFHTGLDITLNYKYKFNVAISDDLWACLTKAANNITDVKSVMDTWTLQMGYPLITITKNHEQSEKGLVTQE  
HFLLIDVRKTAASFPNYKWDVPITFYFEHKKKEQLVWFRNSADSINIPMNASGWIKANIDQLNFRVYNY  
DENDNWLLSKQLQDNHKAFSTSDRSNLIDDAFELAKAGKLDQIKALEMTAYLKNEDYVFPWITALGSLGY  
IGGLLQGRSCYSSYQKYIIQQVKPVDVKLGWSDGETHLNRLYRGAALRSSVMHNDTDSVKRALEIFDRFM  
NNHESVAPNLRSTVYLAGIKYGGKEQWEFMLNKYLSNFPFSEQRKIMFALADSSDESILKYLSWSMNTS  
IIRTQDTCGVIEHISTNIKGTMAEDFVIKNWEKLFERYGRGSFDMSSLIKTVFARMKTKEDLKVKSEIC

**Nematostella vectensis:**

>XP\_032239104.1 aminopeptidase N isoform X1 [Nematostella vectensis]  
MDEAYDNGSPNQESSDSSPEDDIDSIALLPERKTRPRRLRRRRRIIPEDNGGHLRTNMRCSRRITVYST  
ITAVLLICVVIISVFNPSSTDEFEKTEKRSSEFQDEPEKKDDSSFYEDHGGRKFAWQKIRLFPSSVTP  
EYTVILRKLDPDPTFGSGNVSVRVKCNEDTDYIFIIHAKQMRLLTKFEVLNQGKEPLKIMETANCEKLEMFV  
IKVKGGLKGESYVLQIDFNAVLAELKITGFYKSSSYKDKDGNTRYLATTHFEPTDARAAPCFDEPALKAV  
FNWYIRKAEHVLSNMPKETFKKDESGQVIVIFEPYSVMSYTLVAFVVCDFPKSKEATTKRGTLVVRWA  
FEDNIDEGDVALSKALFVYKLVLPKQDLIAIPDFAAGAMENWGLITYRLTSILYDEPVSQ  
SNKQWAVVVAHELAHQWFGNLTVMKWNWDLWLNEGFASFVENIGVNHHTPEWRMMEQLDKDTQLSMNL  
DQLSNSHPISSVVKDPAEINSLFDTISYDKGAAILRMLKSLFLGDVFOKGLQKYLNKHKFGNAETNQLWD  
AFTESVSASSSTKNFRDVKSVMDTWTLQMGFPVVTIKQRGDSAVASQKHFRIPHKVPKSLRSQFDYKWI  
IPFTYTYTQNDKTKKMAIEKDNREGEGILQFDYNPATSGWIKANYEQHGFRVYVDAENWERLKQQLDT

DHEKLSAADRAGLLDDAFNLARAGELPLTTALDLTKYLTKEEYVWPAAALSNMGFLSRLCENEHHMTL  
YKRYALQQLIPIVRKLGWDDKGSHLQKYLRSYVLKLCARYGDVECATAVKSRFADWMRGESLPNLRSVI  
YDTGVHLGGEKEFKYMYEQYNKSTVAAEKRRLLFAMSATQNPALMKGLLDMSMSTQIRSQDTSVITSVA  
SNCKGRNLAWDFVKKHWKTLFKRYGHGSFDFARLVSRTTTHFSTPQKLKEIQEFFKKHELGSGLASKQA  
EEGISSNI DWMKNNIEVALKWEHTQAESKPADGDLGVANVERLENILAPEGFQEEYQDRENQEKPYQN  
KRYYSNQHYGRGDDQDRRF SNEYNDDYEPERRGYEQ

## **Amphimedon queenslandica:**

>XP\_003386159.1 PREDICTED: glutamyl aminopeptidase-like isoform X1 [Amphimedon queenslandica]  
MSRHRNGFEQLDGESSDTDMNLEDNESSALTGKKKKRYLVNDEEGPLCSPGSLKLSKRELICILIGGIIII  
VAAIVFVIIAVVLSRSSGNGSPGSSDDKPWNVRLPKLTLPALYRVSLDLDNTFRVNGFVSVDISVNQS  
TDLVIFHAKDMLNTVSLTKGVRGDLGISRQFFYSNDFFVYIQLADSLDTNDNLQLNISFNITL RDDLV  
GFYKSSYSLADNEVHYLATTTQFEPTDARRAFPCFDEPAMKANFSIELTHANRYNAVSNMFPVARRVSKAND  
KATTSFNNTSYKMSYTLVAFVISDFNCSDSQTVNGHIQVRVCARPDVFSDTSYALSVGKSVIGYEEFFGV  
QYPLPKQDLFAIPDFAVGAMENWGLITYRETALLYNSTQNPAVNKQRVAVVVAHELAHQWFGNLV TMSWM  
DGLWLNIEGFASYVEYIGTDHVQPDWMMLEQFFIDTVQTAJDADGLNWSHP I IQQVNNPDEINGLFD S ISY  
DKGASLIQMLRGYIGNESFTNGLTLYLKNKFGNTETELWDALNEVSSSDVSQMMDTWTQMGPVV  
TVSASDNNRATVSQKRFFQIPLPEGEQPAASPYNVVWIIIPFDYITENGNSVTKKLVSNQDDTITWDSND  
GFIKANANQTGFYRVNYDVGNWQSITAHLMTPPNNRPQILSAVDRAGLLEDAPSLSTSGLLNTITVALNLS  
RYLVNEEDYAPWMTALRWFSIFSCKLSTNGQYGNFKRYVSSLMGNITRKLSFNKTGLSHLQILLRTYVLL  
SGYKYGDISIADTSLTMFRNWMTDGISVPPDLRLVVYRVIAAGGETEWNYLWSWYKNTNPNYKQICLS  
ALAQSKKEYWILSRYLEYSMSQVRSQDTLYVIRSVARNVNGRYLAWNFRDNYDTIFKKYGGGSF SFSRLI  
RSITGSFATSWELQEVESFFGKVDVGSASLALQQSKEIVRGNI AWLNNESVIGEWMMNEYLSGAMSA

## Alignment

|                                 |                                                                   |     |
|---------------------------------|-------------------------------------------------------------------|-----|
| XP_032824577.1[P.marinus]       | MAGDLHGERAPLPKHMIIENSMFDEDEDEEADAGMPNVDPGADPSLGNSVALSSPRT         | 60  |
| XP_014016586.1[S.salar]         | MEDPFDSEASLPRNMIENSMFEEEPDVVDLAKDSAAPFAL-----                     | 41  |
| NP_001088429.1[X.laevis]        | --METSNDWAQLPRNMIENSMFEEEPDVVDLAKEPTM-NPL-----                    | 38  |
| XP_424862.3[G.gallus]           | -MEFPFSDIQLPRNMIENSMFEEEPDVVDLAKEPCL-HPL-----                     | 39  |
| NP_766415.1[M.musculus]         | -MESFTNDRILQPRNMIENSMFEEEPDVVDLAKEPCL-HPL-----                    | 39  |
| Q9UIQ6[H.sapiens]               | -MEPFTNDRILQPRNMIENSMFEEEPDVVDLAKEPCL-HPL-----                    | 39  |
| XP_024102718.1[P.abelii]        | -MEPFTNDRILQPRNMIENSMFEEEPDVVDLAKEPCL-HPL-----                    | 39  |
| NP_731786.1[D.melanogaster]     | -----MVA-----W                                                    | 4   |
| XP_003386159.1[A.queenslandica] | -----                                                             | 0   |
| XP_019622707.1[B.belcheri]      | -----                                                             | 0   |
| XP_012561211.1[H.vulgaris]      | -----                                                             | 0   |
| XP_032239104.1[N.vectensis]     | -----                                                             | 0   |
| XP_032824577.1[P.marinus]       | LAASSVFLYTQHFLISSGGGSADRPATPEDDSRPHTLSR---LPIYAGDPDEFDEDFDDD      | 117 |
| XP_014016586.1[S.salar]         | -----EPDEVVVEPRSSR---LLVRGL--GENDLDEEEE                           | 70  |
| NP_001088429.1[X.laevis]        | -----ESEETVEPRSSR---LLVRGL--GEQELDEEEE                            | 67  |
| XP_424862.3[G.gallus]           | -----EPDEVVEPRTSR---LLVRGL--GEHEMDDEEE                            | 68  |
| NP_766415.1[M.musculus]         | -----EPDEVVEPRGSR---LLVRGL--GEHEMDEEEE                            | 68  |
| Q9UIQ6[H.sapiens]               | -----EPDEVVEPRGSR---LLVRGL--GEHEMDEEEE                            | 68  |
| XP_024102718.1[P.abelii]        | -----EPDEVVEPRGSR---LLVRGL--GEHEMDEEEE                            | 68  |
| NP_731786.1[D.melanogaster]     | LTVKSVAILFLGLAS--TAFCVATIVLAV---QNADELNDLQDALDKIDALTVDTTSTSS      | 58  |
| XP_003386159.1[A.queenslandica] | -----MSRHR-NGFEQLDGESSDTMNLN                                      | 23  |
| XP_019622707.1[B.belcheri]      | -----MEEQEETIDLGTGFEVVAEDAFA                                      | 24  |
| XP_012561211.1[H.vulgaris]      | -----                                                             | 0   |
| XP_032239104.1[N.vectensis]     | -----MDEAYDNGSPNQESSDSSFE                                         | 20  |
| XP_032824577.1[P.marinus]       | NEESSRRLLGAFFNRDPDEPRSGRPGGGR-A- <b>APSTGPGGSDGPGVHL</b> -----C   | 165 |
| XP_014016586.1[S.salar]         | DYESSARLLGMSFMNRSSSTHNPSSSPYNR-Q-A-----PPR-----S                  | 105 |
| NP_001088429.1[X.laevis]        | DYESSAKLLGMSFMNRSSSGLRNSAANY-R-Q-V-----QDG-----F                  | 101 |
| XP_424862.3[G.gallus]           | DYESSAKLLGMSFINRSSGLRNNMSVY-R-Q-S-----PDG-----                    | 102 |
| NP_766415.1[M.musculus]         | DYESSAKLLGMSFMNRSSSGLRNSAAGY-R-Q-S-----PDG-----                   | 102 |
| Q9UIQ6[H.sapiens]               | DYESSAKLLGMSFMNRSSSGLRNSATGY-R-Q-S-----PDG-----                   | 102 |
| XP_024102718.1[P.abelii]        | DYESSAKLLGMSFMNRSSSGLRNSATGY-R-Q-S-----PDG-----                   | 102 |
| NP_731786.1[D.melanogaster]     | TST-S-----TSTTTTANPNGTDDTEPGSTTTPG-----                           | 88  |
| XP_003386159.1[A.queenslandica] | DNES-----ALTGKKKRYLVNDEEGPLCS-PGS-----L-----KLS                   | 55  |
| XP_019622707.1[B.belcheri]      | SDEDS--LLQAAVVDGEGRRRK <b>RPSRSQGL</b> SWLSPRKSAAASRLPGAQRPLRRKLW | 82  |
| XP_012561211.1[H.vulgaris]      | MSEASTGLNESKNKSNK-----YE--GS-----AW                               | 24  |
| XP_032239104.1[N.vectensis]     | DDIDSTALLPERKTRPRRLRRR <b>RIFEDNGG</b> -----H-LRT-----TNRM        | 60  |
|                                 | *                                                                 |     |
| XP_032824577.1[P.marinus]       | CQOMSPTIMFCAAGAIGVIV--IGIALSYVPCALGIGNOCASSNSSAAGDDHHRGGT         | 223 |
| XP_014016586.1[S.salar]         | CSCPSARMLVVGPFILVLVASM--AMV-LYFLPGCTFTKAGCGKANSS-----             | 150 |
| NP_001088429.1[X.laevis]        | <b>P</b> VPSARTVIVCVVVVLIIVSV--VTV-VYLLPKCTFTKDGCKEKKH-----       | 145 |
| XP_424862.3[G.gallus]           | <b>S</b> VPSRTTMLICTGVLVIAVSV--IMV-IYLLPKCTFTKEGCHKKNR-----       | 146 |
| NP_766415.1[M.musculus]         | <b>S</b> LPSARTLIVICVFVIVVAVSV--IMV-IYLLPRCTFTKEGCHKTNQ-----      | 146 |
| Q9UIQ6[H.sapiens]               | <b>S</b> VPSARTMVVCAFVIVVAVSV--IMV-IYLLPRCTFTKEGCHKKNQ-----       | 146 |
| XP_024102718.1[P.abelii]        | <b>S</b> VPSARTMVVCAFVIVVAVSV--IMV-IYLLPRCTFTKEGCHKKNQ-----       | 146 |
| NP_731786.1[D.melanogaster]     | -----VG-GDTTPSAG-----TSPG-----GETSPSSST-----GS                    | 113 |
| XP_003386159.1[A.queenslandica] | KRELICIL--IG-GIIIVAAIVFVIIIAVLSRS-----                            | 86  |
| XP_019622707.1[B.belcheri]      | QYAPKCSRDRCC-FLFAICLT--IFIV-LVTSALYMSKHKSSCPYSFL-----LD           | 129 |
| XP_012561211.1[H.vulgaris]      | SQHMKLILTGVG-VVFLIALG--VIFGVILNTDRE-----                          | 56  |
| XP_032239104.1[N.vectensis]     | CSRRITVYSTIT-AVLLICV---VVISVFNVPSTSEFEETKRSSEF-----QD             | 107 |
| XP_032824577.1[P.marinus]       | TPSGAGNATFPFTADGEVFPWADDRLPFRSVRPLHYHLCILHFNLT--TLAVEGYVSVMLLV    | 281 |
| XP_014016586.1[S.salar]         | ---TPMEPSYPNSTNGELFPWNELRLPASVRPNVYDLSLTFNLT--SMTFTGRTVINMTI      | 205 |
| NP_001088429.1[X.laevis]        | ---PLELVYPVIANKKVFPWAKSRLPDSIKPVHYTLTMHPNMT--TLSFTGTQVQIKLNI      | 199 |
| XP_424862.3[G.gallus]           | ---TMELIVPLATNGKLFPAKIRLPDSVFLPYLDLLOPLT--TLKFTSGVKIVVNV          | 200 |
| NP_766415.1[M.musculus]         | ---SABLQPVAATNGKVFPAQIRLPTAIIPCYELSLHNLNLT--SMTFRGSVTISLQA        | 200 |
| Q9UIQ6[H.sapiens]               | ---SIGLIQPFATNGKLFPAQIRLPTAIVPLRYELSLHNLNLT--SMTFRGSVTISVOA       | 200 |
| XP_024102718.1[P.abelii]        | ---SIGLIQPFATNGKLFPAQIRLPTAIVPLHYELNLHFNLT--SMTFRGSVTISVOA        | 200 |
| NP_731786.1[D.melanogaster]     | T---TNPVYPTLPTGLDPEKIEWRLPTELTPIKYVYVHPDLT--TGACEGTVSIQPOL        | 168 |
| XP_003386159.1[A.queenslandica] | T-----SGNGSPGSDDKPWTNVRLPKTLTPALYRVSLDLDLN--TERVNGFVSVDISV        | 137 |
| XP_019622707.1[B.belcheri]      | TSEKSKAKKDPIATNGERFPWDDVRLPTIVPNSYLLHLHFNLT--TFNFTGHVSNINISV      | 187 |
| XP_012561211.1[H.vulgaris]      | -----NKLNSKREELFPYINIRLPLNIVPERYKIYHFNLTDNKGFPTGTVRILINI          | 109 |
| XP_032239104.1[N.vectensis]     | EPEKKDDSSFYEDGHGRKFAWQIRLPSSSVTPEEYTVILRPKL-DPDFTFSGNVSVRVKC      | 166 |
|                                 | . *** : * * : : *                                                 |     |
| XP_032824577.1[P.marinus]       | DESTDHVVLHANNLTITESILVPADGA-----PAGGDAGSLVAKLLRYEPRDQLMVCT        | 335 |
| XP_014016586.1[S.salar]         | LHNTKHVVLHSSSELIITKATFQVGE-----K-SVEVKVLEYKPPQOIAVSF              | 251 |
| NP_001088429.1[X.laevis]        | TTSSKNIVLHSSGLHIIKASVLVNGG-----T-TMDAEVLEYPPFEEIAIIS              | 245 |
| XP_424862.3[G.gallus]           | TQVTKKIVLHSSGLNITKATITSTGG-----SQEKAVELLEYPHLDQIAVMA              | 247 |
| NP_766415.1[M.musculus]         | LQDTRDILHSTGHNISRVTFMSAVS-----SQEKQAEILEYYPHEQIAVVA               | 247 |
| Q9UIQ6[H.sapiens]               | LQVTWNIILHSTGHNISRVTFMSAVS-----SQEKQAEILEYAYHQQIAIVA              | 247 |
| XP_024102718.1[P.abelii]        | LQVTWNIILHSTGHNISRVTFMSAVS-----SQEKQAEILEYAYHQQIAIVA              | 247 |
| NP_731786.1[D.melanogaster]     | NALTNLIVLHAKELNVHSISLNMMA-----IRVATDSINLDESRELLLTIL               | 216 |
| XP_003386159.1[A.queenslandica] | NQSTDLIVFHAKMDTLNVTSLTKGVRG-----DQLGTSRQFPFYSDNPVITQL             | 185 |
| XP_019622707.1[B.belcheri]      | VKKTDLVVHFHVKELNITQSSVKTMNVN-----SVPIV--KELEYTNGEQYCLRL           | 234 |
| XP_012561211.1[H.vulgaris]      | TEETDSVLLHIDKNISEVKCYHGSSAMSKHKGPEDSQQVPVKDHLISVEHEFLIMRMKE       | 169 |
| XP_032239104.1[N.vectensis]     | NEDTDYIFIAHKQMLTKFEVLNQGKE-----PLKIMETANCEKLEMFSIKV               | 213 |
|                                 | : : : * : :                                                       |     |
| XP_032824577.1[P.marinus]       | RKPLTQGGMYLLNITFTGRLSTSFLGFYRSTYRAEDG---SDRPLAVTQFEPTSARESF       | 391 |
| XP_014016586.1[S.salar]         | PEDLKVGQVCVLTLDYAASLSHTYDGFYNSSYNKDTG---AKRVLAATQFEPPQAARKAF      | 307 |
| NP_001088429.1[X.laevis]        | PESLLKGKCELLTIQYAANFSSTYYGFYKIDYMKDSN---K-RSLAATQFEPLAARKAF       | 300 |
| XP_424862.3[G.gallus]           | PESLLAGQNYTVNLEYSSNLSDTYYGFYRVSYKDENS---KQRWFAATQFEPLAARSAF       | 303 |
| NP_766415.1[M.musculus]         | PEPLLTGHNYTLKIEYSANISSYGFYGITVYTKDSN---EKKYFAATQFEPLAARSAF        | 303 |
| Q9UIQ6[H.sapiens]               | PEALLAGHNYTLKIEYSANISSYGFYGFSTYDESN---EKKYFAATQFEPLAARSAF         | 303 |
| XP_024102718.1[P.abelii]        | PEALLAGHNYTLKIEYSANMSRYFGFYGFSTYDESN---EKKYFAATQFEPLAARSAF        | 303 |
| NP_731786.1[D.melanogaster]     | REVLSMNKAYTILASFDCLDS-SLVGSYISNYTNADG---VDRSIISTKFEPTYARQAF       | 271 |
| XP_003386159.1[A.queenslandica] | ADSLDTNDNLQINISFNVTLRDDLVGFPYKSSYLADN---EVHYLATTQFEPTDARRAF       | 241 |
| XP_019622707.1[B.belcheri]      | GGQLSAGQNTIVVHFSGELNDGLYGFYRSTYTLNKGKDGEESRLATTQFEAANARAAF        | 294 |
| XP_012561211.1[H.vulgaris]      | QHELEVKGQYTLFRFNRGLSNGLEGFYKSSYTTSGK---EKRYLATTTFEATQARAFA        | 225 |
| XP_032239104.1[N.vectensis]     | KGGLKKGESVVLQIDFNAVLAELKTGFYKSSYKDKDG---NTRYLATTTFEPTDARAFA       | 269 |
|                                 | * .. : : : * * * . : : : * * *                                    |     |
| XP_032824577.1[P.marinus]       | PCFDEPDFKASFDISIVRD--AAHTLSLNMPLNETVTR-KDGLLEDTFKG-SVMMSTYLV      | 447 |
| XP_014016586.1[S.salar]         | PCFDEPAFKATFLVIRITRE--PGYITLSNMPEAKTTTL-PSGLLEDEFEQTAVNMSTYLV     | 364 |
| NP_001088429.1[X.laevis]        | PCFDEPAFKSTFQINIIIRN-DESMISLNMPEAKTSKT-SDGLLQDEYST-SVRMSTYLV      | 357 |
| XP_424862.3[G.gallus]           | PCFDEPAFKATFSIRIKRD--EKLSTLSNMPEKATTPV-TKGIVQDEFV-SLRKMSTYLV      | 359 |
| NP_766415.1[M.musculus]         | PCFDEPAFKATFIKITRN--EHHTALSNMPEKSSVPA-EEGLIQDEFSE-SVRKMSTYLV      | 359 |
| Q9UIQ6[H.sapiens]               | PCFDEPAFKATFIKIIIRD--EQYTALSNMPEKSSVVL-DDGLVQDEFSE-SVRKMSTYLV     | 359 |
| XP_024102718.1[P.abelii]        | PCFDEPAFKATFIIRIIRD--EQYTALSNMPEKSSVIL-EDGLVQDEFYE-SVRKMSTYLV     | 359 |
| NP_731786.1[D.melanogaster]     | PCFDEPALKAQFTITVARPSGDEYHVLNMPVASEYVD--GDITEVTFAE-TVPMMSTYLA      | 328 |
| XP_003386159.1[A.queenslandica] | PCFDEPAMKANFSIELTHA--NRYNAVSNMPVARRVSK-ANDKATTSFNT-SYKMSSTYLV     | 297 |
| XP_019622707.1[B.belcheri]      | PCFDEPALKATQLHVMRE--GRHSTLFNMPKD-HIEDLLGLKMDVFK-SVAMSTYLV         | 350 |
| XP_012561211.1[H.vulgaris]      | PCFDEPALKALFEIIMVRE--PQHTALSNMPIVKTINR-TDGLKEDHFQK-SLMMSSTYLV     | 281 |
| XP_032239104.1[N.vectensis]     | PCFDEPALKAVFNMVIYRK--AEHVSLSNMPIKETFKDKESQVIDVFEP-SVRKMSTYLV      | 326 |
|                                 | ***** * : * : : : * * * : : * * * * *                             |     |

506  
422  
415  
417  
417  
417  
417  
388  
357  
410  
340  
385

566  
481  
475  
477  
477  
477  
477  
448  
417  
470  
400  
445

624  
540  
532  
534  
534  
534  
534  
506  
475  
528  
458  
503

684  
600  
592  
594  
594  
594  
594  
566  
535  
588  
518  
563

736  
648  
638  
641  
641  
641  
614  
583  
640  
568  
617

775  
691  
682  
685  
685  
685  
659  
628  
688  
611  
667

831  
747  
738  
740  
741  
741  
741  
715  
688  
744  
667  
723

889  
807  
798  
800  
801  
801  
801  
772  
745  
803  
724  
781

944

|                                 |                                                                |      |
|---------------------------------|----------------------------------------------------------------|------|
| XP_014016586.1[S.salar]         | LMSQDWG---EEE-SVSRQELRSALLEMACSLGRQNCNDQATALYDQWTSNQTKQI-P     | 862  |
| NP_001088429.1[X.laevis]        | TLIKQTWM---DEG-TLAERQLRSSLLDFACSNPGFSCLEKATELFNSWRVKN--TRI-P   | 851  |
| XP_0424862.3[G.gallus]          | KIDQQNWT---DDG-TISERELRSMLLTFFACTHDIRNCRTAASKMFDEWMKSNGTMSL-P  | 855  |
| NP_766415.1[M.musculus]         | QIQQQTWT---DEG-TPSMRELRSALLEFACAHSLNCTTMAIPLFDSWMAASNGTQSL-P   | 856  |
| Q9UIQ6[H.sapiens]               | QIQQQTWT---DEG-TPSMRELRSALLEFACAHSLNCTTMAIPLFDDWMAASNGTQSL-P   | 856  |
| XP_024102718.1[P.abelii]        | QIQQQTWT---NEG-TPSMRELRSALLEFACIHNLCNCSTTAMKLFDDWMAASNGTQSL-P  | 856  |
| NP_731786.1[D.melanogaster]     | IVEKVTFT---VAA-DHLENRLRIKVLSSACSLGHESSLQQAATLFDNQWLASF--ETRFN  | 826  |
| XP_003386159.1[A.queenslandica] | ITRKLSPN---KTGLSHLQILLRTYVLLSGYKIGDISIADTSLTMRFRNMWTDG---ISV-P | 799  |
| XP_019622707.1[B.belcheri]      | TIGVEGWE---DQG-DQLTKFLRSTVLGAACDYGHEQSTQQAHTLIFANMKGT---QNV-A  | 856  |
| XP_012561211.1[H.vulgaris]      | IVDKLGWS---DEG-THLNRYLRGAALRSSVWMDNTDSVKRALBIFDRFNMNH--ESV-A   | 777  |
| XP_032239104.1[N.vectensis]     | IVRKLQWD---DKG-SHLQRYLRSYVLKLCARYGDVECATAVKSRFADWM-RG--ESL-P   | 833  |
|                                 | : * : . : :                                                    |      |
| XP_032824577.1[P.marinus]       | ADLMSTVLRVAVRD-GDRPTWDSVQEHYHRAKSSTEQAQKYLEALASTSDEDQQWSILENA  | 1003 |
| XP_014016586.1[S.salar]         | GDLQRVVFVSAQS---NLGWLSLMEAYSSTTYDSEKRKILQALASTQDPQSIWILSTG     | 919  |
| NP_001088429.1[X.laevis]        | TDVMKVVFVKVGART---TEGWTLRLSTYDSSIYEAERKILQALASTDNAKILQWLMQES   | 908  |
| XP_0424862.3[G.gallus]          | SDLMKAITFGAKT---NDGWELFLKMYSSFPVEAEKSKMIEALASTEDVRKMMWLMQNS    | 912  |
| NP_766415.1[M.musculus]         | TDVMVTVPKVGART---EKGWFLFLFSMYSMGSEAEKNKILEALASSEDVHKLYWLMKSS   | 913  |
| Q9UIQ6[H.sapiens]               | TDVMTVPKVGART---DKGWSFLLGKYISIGSEAEKNKILEALASSEDVRKLYWLMKSS    | 913  |
| XP_024102718.1[P.abelii]        | TDVMTVPKVGART---DKGWSFLLGKYISIGSEAEKNKILEALASSEDVRKLYWLMKSS    | 913  |
| NP_731786.1[D.melanogaster]     | PDIRLVVYYGLQQVNTAAWDQVWKLYLDESDAQEKLKIMNCLTAVQVPWLLQRYINWA     | 886  |
| XP_003386159.1[A.queenslandica] | PDLRLVVYVAIAA--GGETEWNYLWSWYKNTNPYEKQICLSALAQSKKEYWILSRYLEYS   | 858  |
| XP_019622707.1[B.belcheri]      | ANLKTVVYTSVGQH--GGEENWFCWQYTSATVAEAKRLLYALANTRDNKLVTKLLRYT     | 915  |
| XP_012561211.1[H.vulgaris]      | PNLRSTVYLAGIKY--GGKEQWEFMLANKYLPFPPEQRKMLPALADSSDESILKLYLSWS   | 836  |
| XP_032239104.1[N.vectensis]     | PNLRSVIYDTGVHL--GGEKEFKYMYEQYKNSYVAAEKRKLLFAMSATQNPALMKGLLDS   | 892  |
|                                 | :: .: . : *                                                    |      |
| XP_032824577.1[P.marinus]       | MAGVEVRSQELPRIVGVMARTSWTGRLLTWDFLRKRWSLLVEKFSLSGFSALSNMWSVTS   | 1063 |
| XP_014016586.1[S.salar]         | LEGGIQTQELPLVITMSD-GFAGHLFWDFVKENWDKIKKFPVGSYPIQSIKSTTS        | 978  |
| NP_001088429.1[X.laevis]        | LDGGSIRSQELPAVIGFICK-RSPGYLLAWNFIKQNWDLITQKFMPSGFPQINIVSKTTH   | 967  |
| XP_0424862.3[G.gallus]          | LEGEVIRTQELSHIATISH-SLPGHLLAWDFVKENWEKLTTRKPHLGSYTIQNISSSTS    | 971  |
| NP_766415.1[M.musculus]         | LDGDIIRTQKLSLIIRTVGR-HFPGHLLAWDFVKENWNKLVHKFHLGSYTIQNIIVAGSTH  | 972  |
| Q9UIQ6[H.sapiens]               | LNGDNFRFQKLSFIIRTVGR-HFPGHLLAWDFVKENWNKLVHKFHLGSYTIQNIIVAGSTY  | 972  |
| XP_024102718.1[P.abelii]        | LNGDNFRFQKLSFIIRTVSR-HFPGHLLAWDFVKENWNKLVHKFHLGSYTIQNIIVAGSTY  | 972  |
| NP_731786.1[D.melanogaster]     | WDESNVRRQDYFTLLGYIST-NPVGQSLVWDVRENWEKLVDRFGINERTLGRILPTITA    | 945  |
| XP_003386159.1[A.queenslandica] | MSQ--VRSQDTLYVIRSVAR-NVNGRYLAWNVRDNYDTIFPKYGGSGSFSRLIRISITG    | 915  |
| XP_019622707.1[B.belcheri]      | LDSTKIRSQDVTRTITYVSR-TAVGYQLAWNFKVSNWQTFPLDRYGGSGSFNMAELAKIPAH | 974  |
| XP_012561211.1[H.vulgaris]      | MNTSIIRTQDTCGVIEHIST-NIKGTMADDFVKNWEKLFERYKGSGFDMSSSLIKTVFA    | 895  |
| XP_032239104.1[N.vectensis]     | MSTQ-IRSQDTSVITSVAS-NCKGRNLAWDFVKENWNKLVHKFHLGSYTIQNIIVAGSTH   | 950  |
|                                 | :: * . : : * . : : . : : : : :                                 |      |
| XP_032824577.1[P.marinus]       | GFSSTYHLDQVEEFVASLRDSSGELRVFKEARDTIRANHHWLATNRVALHKWLTEQS---   | 1120 |
| XP_014016586.1[S.salar]         | QFSTQTHLEEVQGFSSSLKERGSGMRSVQEALETIRLAQLWMDRNLPTLRILWL-----    | 1031 |
| NP_001088429.1[X.laevis]        | QFSTDVHLENEVIAPFNSTQEKSRGEMCVKEAVETIKLNIEMWNNFDSLATWLLPSQ---   | 1024 |
| XP_0424862.3[G.gallus]          | QFAFKVHLLLEVKTFFESKESKLRVKKEAIDTQLNIQWMEITLAKLQEWL-----        | 1024 |
| NP_766415.1[M.musculus]         | LFSTKTHLSEVQAFQENQSEATLKLRCVQEALEVIQLNIQWMEITLAKLQEWL-----     | 1025 |
| Q9UIQ6[H.sapiens]               | LFSTKTHLSEVQAFQENQSEATFLRLRCVQEALEVIQLNIQWMEITLAKLQEWL-----    | 1025 |
| XP_024102718.1[P.abelii]        | LFSTKTHLSEVQAFQENQSEATFLRLRCVQEALEVIQLNIQWMEITLAKLQEWL-----    | 1025 |
| NP_731786.1[D.melanogaster]     | RFSTETKLEEMQFFAKYPEAGAGTAARQQAQALEAVKANIKWLAANKAQVGEWLANVYQQS  | 1005 |
| XP_003386159.1[A.queenslandica] | SFATSWMELQEVESFFQKV-DVGSASLALQQSKEIVRGNIAWLDDNESVIGEMWNLVSGA   | 974  |
| XP_019622707.1[B.belcheri]      | RFSTRQLEEVKSFQSH-DISAAARAQTIETIQSNIFWLEKNKDKVKTKWIKNYFMFP      | 1033 |
| XP_012561211.1[H.vulgaris]      | RMKTKEDLKKVSEI-----                                            | 910  |
| XP_032239104.1[N.vectensis]     | HFSTPQKLKEIQEFFKKH-ELGSGKLASKQAEEGISSNIDWMKNNIEVALKWLEHTQAE    | 1009 |
|                                 | : : .* : :                                                     |      |
| XP_032824577.1[P.marinus]       | -----                                                          | 1120 |
| XP_014016586.1[S.salar]         | -----                                                          | 1031 |
| NP_001088429.1[X.laevis]        | -----                                                          | 1024 |
| XP_0424862.3[G.gallus]          | -----                                                          | 1024 |
| NP_766415.1[M.musculus]         | -----                                                          | 1025 |
| Q9UIQ6[H.sapiens]               | -----                                                          | 1025 |
| XP_024102718.1[P.abelii]        | -----                                                          | 1025 |
| NP_731786.1[D.melanogaster]     | SVTNRIQ-----                                                   | 1012 |
| XP_003386159.1[A.queenslandica] | MSA-----                                                       | 977  |
| XP_019622707.1[B.belcheri]      | ---EGGKARSSEI-----                                             | 1043 |
| XP_012561211.1[H.vulgaris]      | -----                                                          | 910  |
| XP_032239104.1[N.vectensis]     | SKPADGDLGVANVERLENILAPEGFQEEYQDRENQEKPYQNKRYSNQHYGRDDQDRRF     | 1069 |
| XP_032824577.1[P.marinus]       | -----                                                          | 1120 |
| XP_014016586.1[S.salar]         | -----                                                          | 1031 |
| NP_001088429.1[X.laevis]        | -----                                                          | 1024 |
| XP_0424862.3[G.gallus]          | -----                                                          | 1024 |
| NP_766415.1[M.musculus]         | -----                                                          | 1025 |
| Q9UIQ6[H.sapiens]               | -----                                                          | 1025 |
| XP_024102718.1[P.abelii]        | -----                                                          | 1025 |
| NP_731786.1[D.melanogaster]     | -----                                                          | 1012 |
| XP_003386159.1[A.queenslandica] | -----                                                          | 977  |
| XP_019622707.1[B.belcheri]      | -----                                                          | 1043 |
| XP_012561211.1[H.vulgaris]      | -----                                                          | 910  |
| XP_032239104.1[N.vectensis]     | SNEYNDDDYEPERRGYEQ                                             | 1088 |
