# Supplementary material for: An Evolutionary Perspective on the Origin, Conservation and Binding Partner Acquisition of Tankyrases
Source: MDPI journal article supplement (doi:10.3390/biom12111688), 2022-11-15
Supplement: s1 [file s1]

## Supplementary Data S1

>TNKS1[H.sapiens][NP\_003738.2]  
EFKGHSLQAAREADLAKVKKTLALEIINFKQPQSHETALHCAVASLHPRKQVTELLLRKGANVNEKNKDFMTPLHVAAERA  
HNDVMEVLHKKHGAKMNALDTLGQ TALHRAALAGHLQTCRLLLSYGS DP SI ISLQGFTA AQMGNEAVQQILSESTPIRTSDVDY  
RLLEASKAGDLETVKQLCSSQNVNCRDLEGRHSTPLHFAAGYNRVSVVEYLLHHGADVHAKDKGGLVPLHNACSYGHYEV AEL  
LVRHGASVNVADLWKFTPLHEAAAKGKYEICKLLLLKHGADPTKKNRDGNTPDLVKEGDTDIQD LLRGDAALLDAAKKGCLAR  
VQKLCTPENINCRDTQGRNSTPLHLAAGYNNLEVAEYLLLEHGADVNAQDKGGLIPLHNAASYGHVDIAALLIKYNTCVNATDK  
WAFTPLHEAAQKGR TQLCALLL LAHGADPTMKNQEGQTPLDLATADDIRALLIDAMPEALPTCFKPQATVVSASLISPASTPS  
CLSAASSIDNLTGPLAE LAVGGASNAGDGAAGTERKEGEVAGLDMNISQFLKSLGLEHLRDI FETE QITL DVLADMGHEELKE  
IGINAYGHRHKL IKGVERLLGGQQGTNPYLTFHCVNQGTILLDLAPEDKEYQSVEEEMQSTIREHRDGGNAGGIFNRYNVIRI  
QKVVNKKLRERFCH RQKEVSEENHNHNNERMLFHGSPFINAI IHKGFDERHAYIGGMFGAGIYFAENSSKSNQYVYGIGGGTG  
CPTHKDRSCYICHRQMLFCRVTLGKSFLQFSTMKMAHAPPGHHSVIGRPSVNGLAYAEYVIYRGEQAYPEYLITYQIMKPEAP  
SQTATAAEQKT

>TNKS2[H.sapiens][AAK13463.1]  
EFKGHSLQAAREADVTRIKKHSLEMVNFKHPQTHETALHCAAASPYPKRKQICELL LRKGANINEKTKEFLTPLHVASEKA  
HNDVVEVVVKHEAKVNALDNLGQTS LHRAAYCGHLQTCRLLLSYGCDPNIISLQGFTALQMGNENVQQLQEGISLGNSEADR  
QLLEAAKAGDVETVKKLC TVQSVNCRDIEGRQSTPLHFAAGYNRVSVVEYLLQH GADVHAKDKGGLVPLHNACSYGHYEV AEL  
LVKHGAVVNVADLWKFTPLHEAAAKGKYEICKLLLLQH GADPTKKNRDGNTPDLVKG DGTDIQD LLRGDAALLDAAKKGCLAR  
VKKLSSPDNVNCRDTQGRHSTPLHLAAGYNNLEVAEYLLQH GADVNAQDKGGLIPLHNAASYGHVDVAALLIKYNACVNATDK  
WAFTPLHEAAQKGR TQLCALLL LAHGADPTLKNQEGQTPLDLVSADDVSALLTAAMPSPSALPSCYKPKQVLNGVRSPGATADALS  
SGPSSPSSLSAASSLDNLSGSFSELSSVSSSGTEGASSLEKKEVPGVDFSITQFVRNLGLEHLM DIFEREQITL DVLVEMGH  
KELKEIGINAYGHRHKL IKGVERLISGQQGLNPYLTLNTSGSGTILIDLSPDDKEFQSVEEEMQSTVREHRDGGHAGGIFNRY  
NILKIQKVCNKKLWERYTHRRKEVSEENHNHANERMLFHGSPFVNAI IHKGFDERHAYIGGMFGAGIYFAENSSKSNQYVYGI  
GGGTGCPVHKDRSCYICHRQLLFCRVTLGKSFLQFSAMKMAHSPPGHHSVTGRPSVNGLALAEYVIYRGEQAYPEYLITYQIM  
RPEGMVDG

>TNKS1[G.gallus][NP\_989671.1]  
EFKGHSLQAAREADLAKVKKTLALEIINFKQPQSHETALHCAVA AVHPKRKQVTELLLRKGANVNEKNKDFMTPLHVAAEKA  
HNDVMEVLHKKHGAKMNALDTLGQ TALHRAALAGHLQTCRLLLN YGSDPSIISLQGFTA AQIGNEAVQQILSESTPVRTSDVDY  
RLLEASKAGDLETVKQLCSPQNVNCRDLEGRHSTPLHFAAGYNRVSVVEYLLHHGADVHAKDKGGLVPLHNACSYGHYEV AEL  
LVRHGASVNVADLWKFTPLHEAAAKGKYEICKLLLLKHGADPTKKNRDGNTPDLVKEGDTDIQD LLRGDAALLDAAKKGCLAR  
VQKLCTPENINCRDTQGRNSTPLHLAAGYNNLEVAEYLLLEHGADVNAQDKGGLIPLHNAASYGHVDIAALLIKYNTCVNATDK  
WAFTPLHEAAQKGR TQLCALLL LAHGADPTMKNQEGQTPLDLATADDIRALLIDAMPEALPTCFKLQATVVSASLISPASTPS  
CLSAASSIDNLTGPLAE LAVGGASNTGDGAAGTERKEGEVSGLDMNITQFLKSLGLEHLRDI FETE QITL DVLADMGHEELKE  
IGINAYGHRHKL IKGVERLLGGQQGTNPYLTFHCVSQGTILLDLAPDDKEYQSVEEEMQSTIREHRDGGNAGGIFNRYNVIRI  
QKVVNKKLRERFCH RQKEVSEENHNHNNERMLFHGSPFINAI IHKGFDERHAYIGGMFGAGIYFAENSSKSNQYVYGIGGGTG  
CPTHKDRSCYICHRQMLFCRVTLGKSFLQFSTMKMAHAPPGHHSVIGRPSVNGLAYAEYVIYRGEQAYPEYLITYQIVKPEAP  
SQTGTAAEQKT

>TNKS2[G.gallus][NP\_989672.1]  
EFKGHSLQAARESDVARIKKHLSLETVNFKHPQTHETALHCAAASPYPKRKQVCELL LRKGANINEKTKDFLTPLHVASEKA  
HNDVVEVVVKHEAKVNALDNLGQTS LHRAAHCGHLQTCRLLLSGGCDPSIVSLQGFTALQMGNESVQQLQEGIPLGNSDADR  
QLLEAAKAGDVDTVKKLC TVQSVNCRDIEGRQSTPLHFAAGYNRVSVVEYLLQH GADVHAKDKGGLVPLHNACSYGHYEV AEL  
LVKHGAVVNVADLWKFTPLHEAAAKGKYEICKLLLLQH GADPPKKNRDGNTPDLVKG DGTDIQD LLRGDAALLDAAKKGCLAR  
VKKLCSPDNVNCRDTQGRHSTPLHLAAGYNNLEVAEYLLQH GADVNAQDKGGLIPLHNAASYGHVDVAALLIKYNACVNATDK  
WAFTPLHEAAQKGR TQLCALLL LAHGADPTLKNQEGQTPLDLVTADDVSALLTAAMPSPSALPSCYKPKQVISVSQTASSTADPLS  
SVPSSPSSLSAASSLDNLSGSFSELPSVVG TNSAEGATVLEKKEVSGVDFSINQFVRNLGLEHLIDIFEREQITL DVLVEMGH  
KELKEIGINAYGHRHKI IKGVERLISGQQGLNPYLTLNTSSSGTLLIDLSS EDKEFQSVEEEMQSTVREHRDGGHAGGVFNRY  
NILKIQKVCNKKLWERYTHRRKEVSEENHNHANERMLFHGSPFVNAI IHKGFDERHAYIGGMFGAGIYFAENSSKSNQYVYGI  
GGGTGCP IHKDRSCYVCHRQLLFCRVTLGKSFLQFSAMKMAHSPPGHHSVTGRPSVNGLALAEYVIYRGEQAYPEYLITYQIV  
KPEATTEA

>TNKS1[X.laevis][XP\_018099068.1]  
EFKGHSLQAAREADLAKVKKTLALEIINFKQPQSHETALHCAVASLHPRKQVITELL LRKGASVNEKNKDFMTPLHVAAERA  
HNDVVEVLHKKHGAKMNALDTLGQ TALHRAALGGHLQTCRLLLSFGSDASIVSLQGFTA AQMGNEAVQQILNESTPVRTSDVDY  
RLLEASKAGDLDIVKQLCSSQNVNCRDLEGRHSTPLHFAAGYNRVSVVEYLLHHGADVHAKDKGGLVPLHNACSYGHYEV AEL  
LVRHGASVNVADLWKFTPLHEAAAKGKYEICKLLLLKHGADPTKKNRDGNTPDLVKG DGTDIQD LLRGDAALLDAAKKGCLAR  
VQKLCTQENINCRDTQGRNSTPLHLAAGYNNLEVAEYLLLEHGADVNAQDKGGLIPLHNAASYGHVDIAALLIKYNTCVNATDK  
WAFTPLHEAAQKGR TQLCALLL LAHGADPTMKNQEGQTPLDLATADDIRALLIDAMPEALPSCFKPQATVVSASLISPASTPS  
CLSAASSIDNLTGPLAE LAVGGVSNAGDGAAGTERKEGEVTVLDININQFLKSLGLEHLRDI FETE QITL DVLADMGHEELKE  
IGINAYGHRHKL IKGVERLLGGQQGTNPYLTFHCVSQGTVLLDLASDDKEYQSVEEEMQNSIREHRDGGNAGGVFNRYNVIRI  
QKVVNKKLRERFCH RQKEVSEENHNHNNERMLFHGSPFINAI IHKGFDERHAYIGGMFGAGIYFAENSSKSNQYVYGIGGGTG  
CPTHKDRSCYICHRQMLFCRVTLGKSFLQFSTMKMAHAPPGHHSVIGRPSVNGLAYAEYVIYRGEQAYPEYLITYQIMKPETP  
LQAATTAEQKT

>TNKS2[X.laevis][XP\_018082988.1]

EFGKHSLLQAAREADLTTRIKKHLSEIVNFKHPQTHDTALHCAASSPYPKRKQVCELLFRKGANVNEKTKDFTPLPHIASDKA  
HNDIVELLIKHEAKVNALDNLGQTSLHRAAHCGHLQTCRLLLSNGCDPSIVSLQGFTALQMGNESVQQLQEGLPFSNSDADS  
QLLEAAKAGDLDVVKKLCITSQSVNCRDVEGRQSTPLHFAAGYNRVAVVEYLLQHGADVHAKDKGGLVALHNACSYGHYEVTEL  
LVKHGAVINVADLWKFTPLHEAAAKGKYEICKLLLLKHGADPTKKNRDGNMPLDMVKDGDTDIQDLLRGDAALLDAAKKGCLAR  
VKKLCTPENVNCRDQTQGRHSTPLHLAAGYNNLEVAEYLLQHGADVNAADKGGGLIPLHNAASYGHVDVAALLIKYNACVNANDK  
WAFTPLHEAAQKGRQTQICALLLAHGADPALKNQEGQAPLDLVTADDVRALLTAAMPAPALPTFYKQPQLLNVQPSTTAIAALS  
SVPLSSPTLSAASSLDNLASSFSETTSVSSGGAEGASGLDKKDEGVDLNINQFLRNLGLEHLIDVFEREQITLQDLVLIEMGHKE  
FKEIGISAYGHRHKI IKGVERLISGQHGLNPYLTLNTSNSGTILIDLAPDDKEFLSVEEEMQSTVREHRDGGHAGGVFTKYNI  
LKIQKVCNKKLWEKYTHRQKEVTEENHNHNSNERMLFHGSPFVNAI IHKGFDERHAYIGGMFGAGIYFAENSSKSNQYVYGIGG  
GTGCPHKKDRSCYVCHRQLLFCRVTLGKSFLQFSAMKMAHSPPGHHSVTGRPSVNGLALAEYVIYRGEQAYPEYIITYQIMKP  
EAVAEG

>TNKS1[S.salar][XP\_014017013.1]

EFGKHSLLQAAREADMAKVKKTLALEIISFKHPQTNETALHCAVASPHPKRKQVTELLLRKGANINEKNKDFMTALHVASERA  
HNDILEVLQKHGAKVNAVDTLGQTALHRAALAGHIQTCRLLLSYGADPAIVSLQGFTASQMGNEAVQQILNENVPTRNSDQVY  
RFLEAAKAGDLDTVQQLCTPQNVNCRDLEGRHSTPLHFAAGYNRVAVVEYLLHGGADVHAKDKGGLVPLHNACSYGHYEAEL  
LVRHGASVNVADLWKFTPLHEAAAKGKYEICKLLLLKHGADPTKKNRDGNMPLDMVKDGDTDIQDLLRGDAALLDAAKKGCLAR  
VQKLCSPENINCRDQTQGRNSTPLHLAAGYNNLEVAEYLLHGGADVNAQDKGGGLIPLHNAASYGHVDIAALLIKFNTCVNATDK  
WAFTPLHEAAQKGRQTQICALLLAHGADPTMKNQEGQTALDLATADDIRALLMDAMPDPALPSCFKPQATVVSAGSVISPASTP  
SCLSAASSIDNLGAPLNLGAAGTSGVADGATGSDRKEGELVMLDMNISQFLKSLGLEHLRDIIFEREQISLDVLADMGHEELK  
EIGINAYGHRHKLIKVERLLGGQQGANPYLTFHCANQGTVLIDLAPDDKEGQSVEEEMQSTIREHRDGGNAGGVFSRYNI IK  
IQKVVNKKLRERYTHRQKEISDENHNHNSNERMLFHGSPFINAI IHKGFDERHAYIGGMFGAGIYFAENSSKSNQYVYGIGG  
GCPTHKDRSCYLCRQMLFCRVTLGKSFLQFSAMKMAHAPPGHHSVIGRPSVNGLAYAEYVIYRGEQAYPEYLITYQILKPES  
TATSAAGEDQKS

>TNKS2[S.salar][XP\_014034742.1]

EFRGHALLQAAREADLRLKKHLSLETITFKHPLTHETALHCAATSPPYPKRKQVCELLLRKGANVNEKTKDFTPLHLASEKS  
HNDIEVLVKHEAKVNALDNLGQTALHRAAHCGHLQTCRLLLLKAGCDPLVMSLQGFSPSQMGNESVQEIILHEGTLIGNSDVDW  
QLLEASKSGDLEIVKKLCMTQNVNCRDVEGRQSTPLHFAAGYNRVSVVEYLLHGGADVHAKDKGGLVPLHNACSYGHYEAEL  
LLVVRGAVVNVADLWKFTPLHEAAAKGKYEICKLLLLKHGADPTKKNRDGNMPLDMVKDGDTDIQDLLRGDAALLDAAKKGCLAR  
VEKLCSPDNVNCRDAQGRHSTLLHLAAGYNNLEVAEYLLQHGAEVNSQDKGGGLIPLHNAASYGHVDVAALLIKYDACVNATDK  
WAFTPLHEAAQKGRQTQICALLLAHGADPALRNQEGQSPDLDLVTVDVDRALLTAAMPSPALPGCYKPQVISMSSPVGVVPPSL  
SASSTPLSTLASRNSLDNQATASTCTAFPELPALLGPSGAVGTDNKEVPGVDLSIGQFLNNLGLLEHLLEIFEREQITLQDLVLE  
MGHKELEKEIGINAYGHRHKI IKGVERLISGPQSLNPYLTLNTANS GTILIDLVSDDKEFQLVEEELQSTIREHRDGGLAGGVF  
NRYNIVIKIQKVCNKKLWERYTHRRKEVSEENHNHNSNERMLFHGSPFVNAI IHKGFDERHAYIGGMFGAGIYFAENSSKSNQYV  
YGIGGGTGCPHLKDRSCYVCQRHLLFCRVTLGKSFLQFSAMKMAHSPPGHHSVTGRPSVNGLSLAEYVIYRGEQAYPEYLITY  
QILKPDASVDG

>TNKS[P.marinus][XP\_032806710.1]

EFRGHSLQAAREADVTRVKKHLGLDIINFKHPQTHETALHCAVASPPYPKRKQVSELLLRKGANVNEKTKDLLTPLHVASDKA  
HNDVIDVLLKHGAKINVTDLSLGQTSLHRAAHAGHLTTCRLLLSHGCDPNLP SLQGFATAQLGNESVQQILHESSLPVRNSDVE  
HQLLEAAKAGDLDTVKQLCTTQTVNCRDMEGRHSTPLHFAAGYNRVSVVEYLLQHGADVHAKDKGGLVPLHNACSYGHYEAEL  
LLVVRGAVVNVADLWKFTPLHEAAAKGKYEICKLLLLKHGADPTKKNRDGNMPLDMVKDGDTDIQDLLRGDAALLDAAKKGCLAR  
RVQKLCSEGENVNCRDSQGRNSTPLHLAAGYNNLEVAEYLLHGGADVNAQDKGGGLIPLHNAASYGHVDIAALLIKYSACVNATD  
KWAFTPLHEAAQKGRQTQICALLLAHGADPSMKNQEGQTPDLATADDVRALLIDAMPPEALPVTHKPPSIPTIAATSAAATAA  
LALGPTPALASLAPSPVPSGASASGAGVPLLASPSSTPASLSAASSMDSL TGACGVAPSPVPAGAIGAGAAGDGTLLGACGV  
SAADGATGFPADKPD RSADFEI PGLDMNINMFLKGLGLDHLRDI FEKEQITLQDLVADMGHEELKEIGINAYGHRHKLIKVERL  
LGAQQGGGLAYPGANPYLSYHTTAQGTLLIDLPPDDKEYQSVEDEMSTIREHKDGGQAGGVFNRYNVIKIQKVRNKKLWERYT  
HRRKEVTEENHNHNSNERMLFHGSPFINAI INKGFDERHAYIGGMFGAGIYFAENSSKSNQYVYGIGGGTGCPVHKDRSCYICQ  
RQMLFCRVTLGKSFLQFSAMKMAHSPPGHHSVIGRPSVNGLAFAYEYVIYRGEQAYPEYLITYQILKPECTPDLTSAAGQKS

>TNKS[B.belcheri][XP\_019641281.1]

EFGKHCLLDGARQTDMAKVKKHLQLDIINFKHPYTHDTALHCAALSPPYPKRRQITELLIRKGANLNDKNKEFLTPLHVASDKC  
YIDVMEVLLKHGAKVNALDLSLGQTALHRGAHCGHVQACRLLLSFGVDPSIVSLQGVTA AQMATEAVQQLMHEDPPSGPADECD  
QLLEAAKAGDLEAVKVLCPNHTVNCRDVNGRHSTPLHFAAGYNRVAVVEYLLQHGADVHAKDKGGLVPLHNACSYGHYEVCEL  
LLKHGAVVNVADLWKFTPLHEAAAKGKYEICKLLLLKHGADPNKKNRDGNMPLDMVKDGDTDIQDLLRGDAALLDAAKKNLAR  
VQKLATPENINCRDQTQGRNSTPLHLAAGYNNVEVAEFLLENGADVNAQDKGGGLIPLHNASSYGHVEIAQLLIKYGTVCVNATDR  
WNFTPLHEAAQKGRQTQICALLLAHGADPTMKNQEGQTPDLATAEDVRALLVDAMPQSLPAAITAATVKAASPISSPSTTPS  
STPGVLSTASSMDHLVGAVGGAGQGDGAIDRSAGESELDMTIS SFLLQQLGLNQLLDIFNKEQITLQDLGEMGHEELKEIGV  
NAYGHRHKLIKVERILGGTGTTLPALGSHGTILTDLSPDDKEYQSVEEEVQSTIRQHKDQGGAGGFNRYNVIKIQK  
VRNKRWLDRYVHRRKEVSEENHNQSNERMLFHGSPFINAI INKGFDERHAYIGGMFGAGIYFAENSSKSNQYVYGIGGGTGCP  
IHKDRSCYICQRQMLFCRVTLGKAFLQFSAMKMAHAPPGHHSVIGRPSVGGNLFAEYVIYRGEQAFPEYLITYQIVKPEAPAA  
PSPDQK

>TNKS[D.melanogaster][NP\_651410.1]

EYKGHCLLDACRKCDVSRKKLVCAEIVNFVHPYTGDTPLHLAVVSPDGKRKQLMELLTRKGSLLNEKNKAFLTPLHLAAELL  
HYDAMEVLLKQGAKVNALDLSLGQTPHLRCARDEQAVRLLLSYAADTNIVSLEGLTAAQLASDSVLKLLKNPPDSETHLLEAAK

AGDLDTVRRIVLNNPISVNCRDLDGRHSTPLHFAAGFNRPVQFLLHEHGAEVYAADKGGVLPLHNACSYGHYEVTETELLVKHG  
ANVNVSDLLWKFTPLHEAAAGKYDICKLLKKGADPMKKNRDGATPADLVKESDHDVAELLRGPSALLDAAKKGNLARVQRLV  
TPESINCRDAQGRNSTPLHLAAGYNNFECAEYLLENGADVNAQDKGGLIPLHNASSYGHLDIAALLIKHKTVVNATDKWGFTP  
LHEAAQKGRQTQLCSLLLAHGADAYMKNQEGQTPIELATADDVKCLLQDAMATSLSQQALSASTQSLTSSSPAPDATAAAAAPGT  
SSSSSSAILSPTTETVLLPTGASMILSVPLPLSSSTRISPAQGAENGAEAGSSDDLLPADTITNVSGFLSSQQLHHLIE  
LFEREQITLDILAEMGHDDLKQVGVSAYGFRHKILKGIAQLRSTTGIGNNVNLCTLLVDLLPDDKEFVAVEEEMQATIREHRD  
NGQAGGYFTRYNIIRVQKVQNRKLWERYAHRREQEIAEENFLQSNRMLFHGSPFINAIVQRGFDERHAYIGGMFGAGIYFAEH  
SSKSNQYVYGIGGGIGCPSHKDKSCYVCPRLQLLRCRVALGKSFLQYSAMKMAHAPPGHHSVVGRRPSAGGLHFAEYVVYRGEQS  
YPEYLITYQIVKPDDSSSGTEDTR

>TNKS[N.vectensis] [XP\_032220531.1]  
EFKGHQILEAAKGCDTAKIKKLITTEINFQHPLTLDTPLHVAVASSSPKKKGVIETLLKKGADPNLQNKSSYAPLHVAAEKG  
LFEAMELLLLKHGAKVNAIDSAGQ TALHVA A IAGQVQACRVLMNGADPTCQTFQGYTAFEVAPEPVQKVLHVNEESPSPVSDA  
EKQLEAAKTGDL ETVKNLCTAQTVNCRDL DGR CSTPLHFAAGYNRVRVVEYLLNGADVHAKDKGGLVPLHNACSYGHYEVA  
ELLVKHGAIVNVADLWKFTPLHEAAAGKYEICQLLLKHGADPQKKNRDGYTPLDLVKEGSDVDADLLRGDAALLDAAKKGNL  
IRITKLATPENINCRDTQGRNSTPLHLAAGYNHLEVAEYLLHEGADVNAQDKGGLIPLHNASSYGHVDIAALLIRYNTDVNAT  
DRWLF TPLHEAAQKGR TQLCALLLAHGAEP SMKNQEGQSPVDLATAEDVKCLLG DAMLSTQTTSVSTAPVAKVPAPVTATAGA  
ATPATGPISGMAPLSQANSSLLANSPAGHGDGAFSNRSVSEAQGEAVRSISAVHPGLD VDVGQFLDGLQLNNLKEIFEREQIS  
WDVLVDMGHEELKEIGIHAYGHRHKILKAVKEKISGMGLGLGPFSTSQVQGSVIQELSMVDKDFASVADEMQSTIVEHRD SGT  
AGGVFTSYTILKIERVNTKLWEKYVYRRREIADSNHNHANERMLFHGSPFINAIVQKGFQDRHAYIGGMFGAGIYFAENSSK  
SNQYVYGIGGGSGCPTHKDRSCYSCERQLLLCRVALGKPFYQFSAVKMAHAPPGHNSVIGRPSGGLSFAEYVIYRGEQAYPE  
YLITYKINKPDT

>TNKS[A.queenslandica] [XP\_019848937.1]  
EYRGYQLLAAAEDGGIILLKKLLSSQLLKQHHQTLDTLLHKA VLSKSSNRQSVIDALLKRGINLNIGNKENMTP LICAAKKG  
ILEVVEQLVQRGANINH QDINGMTSLHWAVQNEHAQICRYLLSSGANPSIVNNQGQTIYQLKTSDTIQLILKNEPPVSQFEIE  
QQLLEAARNSDLEILKKICTPQNVNCRDTKGRMSTPLHFAAGYNRVTVVEFLENGADVHAKDKGGLVPLHNACSYGHYEVAE  
LLVKYKANVNAMD LWKFTPLHEAAAKEKYDICKLLKNGANVH SKNRDNLTPIDL VKDPKSDLADLLRGEPALLDAAKKG EIE  
RVKKLLTEDNVNCRDEYGRNSTPLHLAAGYNHLDVVEYLL ENKADVNAKDKGGLVPLHNASSYGHVDVASLLIRYNSVINATD  
RWNFTPLHEAAQKGR TQVCSLLIIHGADVYLKNQEGQIPLDLATADDVIAL LQDAMMKDIPLTIPPAEKEAKSNIVNKG LTAA  
GASLLASELVLDGVDGVDKNGMVTQQRGGPAGVGDGSDKG FMSYRGGGDAPPWHNVTVKDILTELELGHVLVLFEREQITIDI  
LIEMNGDDLQSIGITAFGVRHRL LKRIRELVQGNNEEYPVGVT TTKPTQGTQLIELSSDDKEFIDTADLMQSTICEHRDDGKA  
GGVDFS YEILKIERIVNTKVWERYKYRREKEVAESNNNCANELMLFHGSPFVPIVHNGFDERHAYIGGMFGAGIYFAEHSSKS  
NQYVYGIGGGNGCPEHKNRSCYTCLRKLLLCRVVLGKPV EQYTAVRIAHAPPGHHSVIGRPSAGGLNYPEYVIYRGEQAYPEY  
IITFRIKKPSATDSMSSSSSLDMSNNT

>TNKS[S.macrocollata] [GGOT01036632.1]  
EAAGCVLLAALRTNDVSKIRRTLQPETANYCAHGTQTP LHVAVQCARRAAVA A VRLLLEWKVDVNAQDARGRTPLHEACENG  
NAEVVELLLAHNADHSL EDDKGHTAGVLAL EHGQDDVNVN LRAHGA AVGVIDDPGR LRQVARLQSMMLRAAKDDVD TMKRVL  
QSPLVLQEP SLRQELLD CRDHEGRHSAPLHFAAGYNRVAACRFL LSEGATVHVRDKGGLVPLHNACSYGHHEIMKLLVEH HAS  
VNEVDQWQYTP LHEAANKGKKDIVRFLLEHGADPNVKNSE GKRAVDLV PPELTDLKDMLS GDAALLEAAKLGQLDRVIKLC T P  
TNVNCRDCEGRNSTALHLAAGYNQLSVVEYLLHEGADV NARDKGLL VPLHNAASYGHAEVAELLIGRGADV NATDRWGFTPLH  
EAAQKGR TQLCTLLLNHGAMLHKCNQDGKTALD LATA S DIRALLSDLSLHTVPVPA AVAKEGEPELARRMPAAGVSMVPAPDM  
EGAQDHSTMEKWLHSLGLDEYTRLFEKERITFDVLVDM SHDDLEKIGVQAFGDRARLVKAVRQRATAIPASWLGEQKIVSLQA  
SDIDFVQTSKMVLETIKRHGTQAGGVYRTFAITAIKRIQNI GLWKRYAFRRDEIEAENGGTANERLLFHGSPFVDSITQRGFD  
ERHAYFGGMFGAGIYFAEHSSKSNQYVYGVG GFGCAAHSDTSCYVCERQLLLCRVALGKSCVHTTAQRAAHAPPGHHSVIGE  
PSKNGLQYPEYIIYRGEQAYPEFLIAYRLVKPS

>TNKS[S.kvevrii] [GGOX01000296.1]  
HVRGGKLLAAIRDQDLAAVRDLLAADPELLLSFASTNHTT PLHIAAESTTPEAEGIFDLLVSAAPSTVLNAKDAAGRTCLHV  
AALNSNLNGVKKLIAAGININLQDGQATALLLSAEHKKHDI MRCLLRHGADPSVPNASGARAEDVASAAGRALLHGEVPDVE  
LQVLEAAKTGNLAALNRLLDANNELVNCRDPEGRNSTALHFAAGFNRLAAAKLLISR GADVHCEDKGGLVPLHNACSYGHFEI  
CKLLVESGASVNTADMWNFTPLHEAAHKGLDIAKLLIEHGADLNKRNC DGKRPMDLVGDDQDLIDL LSGDAALLEAAKLGQL  
DRVRKLV RPDNVNCRDAQGRNSTPLHFAAGYNQLAVVQCLIDAGADVNAQDRGGLIPLHNAASYGHNEVAEVLIDNGSEVNAK  
DKWSFSPLEHAASKGR TQMCTLL LQH GADANSR NEDGKTPLQLATAEDVIVLLNAVSAQTRIATAPTAAAPRQS QLSAATASS  
LQGASTQKTQADPHLGRSKTSDGAAESERAMLIGEDEDVQHLPPPAEEVPVQEDPDGSILLKG FLEKLSLQSLYPLLSAV  
PWTQLCTMGHIELEELGILDADHRSALVSSFWRDCAPRTLDAIVAPPQDWTDEELVSVPDPTPTYAGIEKRILSTIQQHEGAA  
GGNYSTFKITSMQRIQNRGLWQYAFRRQLVAMENDGDPGERLLFHGSPFAETIALRGFDERHAFFGGMFGAGIYFAQDSSKS  
NQYVHIGGGTGCKQHNTSCYECERIMLVCRVTLGHACYQASSNKVAHAPPGHHSVVGKPTPGGLAFYEYVVYRGEQAYPAF  
RVTYKLVFP
