# Supplementary material for: An Evolutionary Perspective on the Origin, Conservation and Binding Partner Acquisition of Tankyrases
Source: MDPI journal article supplement (doi:10.3390/biom12111688), 2022-11-15
Supplement: s1 [file s1]

# Arpin

**Homo sapiens:**

>NP\_872422.1 arpin isoform 1 [Homo sapiens]  
MSRIYHDGALRNKAVQSVRLPGAWDPAAHQGGNGVLLEGELIDVSRHSILDTHGRKERYVLYIRPSHIH  
RRKFDAGKNEIEPNFSATRRVNTGFLMSSYKVEAKGDTDRLTPEALKGLVNKPELLALTESLTPDHTVAF  
WMPSESEMEVMELELGAGVRLKTRGDGPFLDSLAKLEAGVTVKCNFTGDGKTGASWTDNIMAQKCSKGAAA  
EI**RCQGSGAG**DEEWDD

**Pongo abelii:**

>XP\_024088103.1 arpin isoform X2 [Pongo abelii]  
MSRIYHDGALRNKAVQSVRLPGAWDPAAHQGGNGVLLEGELIDVSRHSILDAHGRKERYVLYILPSHVV  
RRKFDAGKNEIEPNFSATRRVNTGFLMSSYKVEAKGDTDRLTPEALKGLVNKPELLALTESLTPDHTVAF  
WMPSESEMEVMELELGAGVRLKTRGDGPFLDSLAKLEAGVTVKCNFAGDGKTGASWTDNIMAQKCSGEGAAA  
EI**RCQGSGAG**DEEWDD

**Mus musculus:**

>NP\_081696.1 arpin [Mus musculus]  
MSRIYQDSALRNKAVQSARLPCTWDDPATHQGGNGILLEGELVDVSRHSILDAHGRKERYVLYIQPSCIH  
RRKFDPKGNEIEPNFSATRKVNTGFLMSSYKVEAKGDTDRLTLEALKSLVNKPQLLELTESLTPDQAVAF  
WMPSESEMEVMELELGTGVRLKTRGDGPFIDSLAKLELGTVTVKCNFAGDGKTGASWTDNIMAQKSSERNTA  
EI**RCQGSGAG**DEEWDD

**Gallus gallus:**

Not found

**Xenopus laevis:**

>NP\_001087754.1 arpin [Xenopus laevis]  
MSRIYQHTALQNKPVHDERFDGSWEPGAQFRGTGVLLEGTLDFSRAVTD SGKKKERYIILYLRPSKIH  
RRHFD SKGNEIEPNFSDTKKVNTGFLMSSYKVEAKGESDRISLEELNRLVNKNLMIKSEKHTPRETVAF  
WLPEADMEKTELELGEQLRVKTMGDGPFFLSLAKVDSGTVTKCNFAGDAQAGASWTDNIMERKSQNTSAP  
SEP**RCQGSGAG**DEEWDD

**Salmo salar:**

>XP\_013979611.1 arpin isoform X3 [Salmo salar]  
MSRIYNNTSLQNKPVHNEKIEHAWAPSSYQSGLVILEGKLVDSVRHVITDVNNQKDRFYVLYIKPSRIH  
RRKFDAGKMEIEPNFSDTKKVNTGYLMSSFVEAKGETDCLTEVQLENLVTKEDLVKVTGKHCLSGTYAF  
WYPEGEMSKTELETGQDIRLKTGDPFFIFSLAKVDGSGTVTKCNFAGDKEAGASWTDKIMSNKSDASSAT  
KSEGHGEGADEEWD

**Petromyzon marinus:**

>XP\_032824636.1 arpin [Petromyzon marinus]  
MSRIYDNKLEARPLHSETWPRPWEPSAFEQGSGLVLEGLGEISRHVILDSAGAKHRYSVLHVRPERAH  
RRCWDTGGREIEPNFSETRLVSTGHLFSSYKCEAKGETDRLSESELRAVAQAKLDSVVGRRHGPQGTLPF  
WVAEDDVKKTELELGDRIKIKTRGDSFFVFSLARVDAGTVTRCNFAGDAAAGASWTDKILGVKSGLDAPP  
PGASGDGEGAADDEWD

**Branchiostoma belcheri:**

>XP\_019625759.1 PREDICTED: arpin-like isoform X1 [Branchiostoma belcheri]  
MLYSTVGRTAGSINFRCAEEGEEQQNTDRPEPKHTEKEQQPTIAIMSRLYDNQPLMSIPVQTHQLTT  
VWNPSNYQKGAGVLVEGRIEGRSRHVIIDPSQTKFRYCVLHVHPQAHRRKFDAAGKEVEPNFSDTWKVN  
TGYLHSSYKVEARGQTDRLTTEELEAVVMSAELDHLTQQVKRHGCLSFWVQEEELAGMELNTGDNVRLKT  
RGDGLFIYNVAQLDGATSQVSNFAGGNMVGASWTEKVMVAKRDQQE**QRDEENQGV**DEEWDD

**Drosophila melanogaster:**

Not found

**Hydra vulgaris:**

Not found

**Nematostella vectensis:**

Not found

**Amphimedon queenslandica:**

>XP\_019858664.1 PREDICTED: arpin-like [Amphimedon queenslandica]  
MSRMHMIYDDTLQQEGVKVSKWKSEWNSSQLQSGRGILLEGVFHKKTRHIIQDTSNKKYRFCVFHIEFD  
GACQRKFDAGKEIEPNFGQTA KVKTGYLNSSYKTVAKGT PDTLSYAEVCERVHSDLVGFETASHSQSIC  
FWGENESYDHVECSFGQRIRLKTRGDSLLIESFTKVLDSQRAHSSNYTGGEKTGQSWTDKVLGHKSTDEP  
SQGTGGGGGGVEDDDEWVRIFLSYVLVHCELHLLLF

|                                 |                                                                 |     |
|---------------------------------|-----------------------------------------------------------------|-----|
| XP_019858664.1[A.queenslandica] | -----MSRMHMYIDDTLLQQ                                            | 15  |
| XP_019625759.1[B.belcheri]      | MLYSTVGRTAGSINFRCAEEGEEQQNTDRPEPKHTEKTEQQPTIAMSRLYDNDQPLMS      | 60  |
| XP_032824636.1[P.marinus]       | -----MSRYDNNKLEA                                                | 12  |
| XP_013979611.1[S.salar]         | -----MSRYNNNTSLQN                                               | 12  |
| NP_001087754.1[X.laavis]        | -----MSRIYQHTALQN                                               | 12  |
| NP_872422.1[H.sapiens]          | -----MSRIYHDGALRN                                               | 12  |
| XP_024088103.1[P.abelii]        | -----MSRIYHDGALRN                                               | 12  |
| NP_081696.1[M.musculus]         | -----MSRIYQDSALRN                                               | 12  |
|                                 | * :.. *                                                         |     |
| XP_019858664.1[A.queenslandica] | EGVKVSKWKSEWNSSQLQSGRGLLEGVFHKTRHIQDTSNKKYRCFVHFIEFDGACQR       | 75  |
| XP_019625759.1[B.belcheri]      | IPVQTHQLTTVMNPSNYQKAGVLVVEGRIGRSRHVIIPDSQTKFRYCVLHVHPQAHRR      | 120 |
| XP_032824636.1[P.marinus]       | RLPHSETWPRWEPSAFEGQGGVLLLEGILGESRHVILDSAGAKHRYSVLHVPRHAHR       | 72  |
| XP_013979611.1[S.salar]         | KPVHNEKIEHAWAPSSYQSLGVLLLEGILVDVSRHIVDNNQKDFRYVLVLPKPSIHR       | 72  |
| NP_001087754.1[X.laavis]        | KPVHDERFDGSEWEPAGFRQGTGVLLLEGTLDFSRHVAVTSKGGKKERWYILYLRPSKIHR   | 72  |
| NP_872422.1[H.sapiens]          | KAVQSVRLPGAADWPAAHQGGGVLLLEGELIDVSRHSILDTHGKREYVYLYLRPSHIHR     | 72  |
| XP_024088103.1[P.abelii]        | KAVQSVRLPGAADWPAAHQGGGVLLLEGELIDVSRHSILDAHGKREYVYLYLRPSHVHR     | 72  |
| NP_081696.1[M.musculus]         | KAVQSARLPGTWDPATHQGGGVLLLEGELVDVSRHSILDAHGKREYVYLYLPQSPCIHR     | 72  |
|                                 | :: * . : * : : : * : : : * : : : * : : : *                      |     |
| XP_019858664.1[A.queenslandica] | KFDAEGKEIEPNFGQTAKVKTGYLNSSYKTVAKGTPDTLISYAEVCERVHSDLVGE--TA    | 133 |
| XP_019625759.1[B.belcheri]      | KFDAAGKEVEPNFSDTWKVNTGYLHSSYKVEARGQTDRLTTEELAVVMSAELDHLTQQV     | 180 |
| XP_032824636.1[P.marinus]       | CWDTGGRELEPNFSETRLVSTGHLPSSYKCEAKGETDRLSESELRAVAQAQKLDVSVGRH    | 132 |
| XP_013979611.1[S.salar]         | KFDAKGMEIEPNFSDTKVNTGYLMSFPKVEAKGETDCLTEVQLENLVTKDLVKVTGKH      | 132 |
| NP_001087754.1[X.laavis]        | HFDKSGNEIEPNFSDTKVNTGYLMSYKVEAKGESDRLSLEELNRLVNKNVLMKISEKH      | 132 |
| NP_872422.1[H.sapiens]          | KFDAKGNEIEPNFSAIRKVTNGFLMSSYKVEAKGDDTLTPEALKGLVNKPELLALTESL     | 132 |
| XP_024088103.1[P.abelii]        | KFDAKGNEIEPNFSAIRKVTNGFLMSSYKVEAKGDDTLTPEALKGLVNKPELLALTESL     | 132 |
| NP_081696.1[M.musculus]         | KFDKPGNEIEPNFSAIRKVTNGFLMSSYKVEAKGDDTLTLEAKSLVNKQELLETESL       | 132 |
|                                 | : * * : : : * . * . * . * : : * * * : : : * . * . : : *         |     |
| XP_019858664.1[A.queenslandica] | SHSQSICFWGENESYDHVECPGGRIRLKTGRGDSLLIESFTKLDSDQRAHSSNYTGGEKT    | 193 |
| XP_019625759.1[B.belcheri]      | HGGTCLSPFWQEEELAGMELNTGDNVRLKTRGDDGLFIYNVAQLDGT-SQVSNFAGNMV     | 239 |
| XP_032824636.1[P.marinus]       | GPQGTLPFWAADDVKKTELELGDRIIRKTRGDSFFVFSRLARVDAGT-VTRCNFAGDAAA    | 191 |
| XP_013979611.1[S.salar]         | CLSGTYAFWYPEGEMSKTELETGQDRIIRKTRGDPFFISLAKVDGDT-VTKCNFAGDQA     | 191 |
| NP_001087754.1[X.laavis]        | TPRETVAFWLPEADMKTELELGGQLRVKTMGDDGPFISLAKVDGDT-VTKCNFAGDKEA     | 191 |
| NP_872422.1[H.sapiens]          | TPDHTVAFWMPPESEMVMELELGAQVRLKTRGDDGPFILDSLAKLEAGT-VTKCNFTGDGKT  | 191 |
| XP_024088103.1[P.abelii]        | TPDHTVAFWMPPESEMEAMELELGAQVRLKTRGDDGPFILDSLAKLEAGT-VTKCNFAGDGKT | 191 |
| NP_081696.1[M.musculus]         | TPDQAVAFWMPPESEMVMELELGTGVRLLKTRGDDGPFILDSLAKLEGT-VTKCNFAGDGKT  | 191 |
|                                 | ** : . * . * : * : * : : : : : : : : : * : * . *                |     |
| XP_019858664.1[A.queenslandica] | GQSWTDKVLGHKSTDEPSQGTGGGGGGVEYDDDEWVRFLSYVLVHCELHLLLF           | 246 |
| XP_019625759.1[B.belcheri]      | GASWTEKVMVAKRDQGE-- <b>RGDEENQGVDEEWD</b>                       | 272 |
| XP_032824636.1[P.marinus]       | GASWTDKILGVKSGLDAPPGASGDEGGADEWD-----                           | 226 |
| XP_013979611.1[S.salar]         | GASWTDKIMNSKSDS-SATKSECHGEAGDEEWD-----                          | 226 |
| NP_001087754.1[X.laavis]        | GASWTDNIMERKSQNTSAP <b>REGQDGAEEDEWD</b>                        | 227 |
| NP_872422.1[H.sapiens]          | GASWTDNIMAQCKSG- <b>AAAEI REGQDGAEEDEWD</b>                     | 226 |
| XP_024088103.1[P.abelii]        | GASWTDNIMAQCKSG- <b>AAAEI REGQDGAEEDEWD</b>                     | 226 |
| NP_081696.1[M.musculus]         | GASWTDNIMAQCKSSER- <b>NTAEI REGQDGAEEDEWD</b>                   | 226 |
|                                 | * * * : : : * * : : * : : : * : : : *                           |     |
