# Supplementary material for: An Evolutionary Perspective on the Origin, Conservation and Binding Partner Acquisition of Tankyrases
Source: MDPI journal article supplement (doi:10.3390/biom12111688), 2022-11-15
Supplement: s1 [file s1]

# NKD2

## Homo sapiens:

>NP\_149111.1 protein naked cuticle homolog 2 isoform 1 [Homo sapiens]  
MGKIQSKHAAARKR**RESPEGDS**FVASAYASGRKGAEAEARRARDKQELPNGDPKEGPFREDQCPLQVAL  
PAEKAEGREHPGQLLSADDGERAANREGPRGPGGQRLNIDALQCDVSVEEDDRQEWTFITLYDFDNCCKVT  
REDMSSLMHTIYEVVDASVNHSSGSSKTLRVKLTVSPEPSSKRKEGPPAGQDREPTRCRMEGELAEPEPRV  
ADRRLSAHVRRPSTDPQPCSERGPYCDVENTERRNHLYDLAGIENYTSRFGPGSSPVQAKQEPQGRASHL  
QARSRSQEPDTHAVHRRSQVLVEHVVPASEPAARALDTPRPKGPEKQFLKSPKSGSGKPPGVPASSKSG  
KAFSYLPAVLPPQAPQDGHHLPPPPPPYPYGHKRYRQKGREGHSPLKAPHAQPATVEHEVVRDLPTPTAG  
EGYAVPVIQRHEHHHHHEHHHHHHHHFHPHS

## Pongo abelii:

>XP\_002815428.2 protein naked cuticle homolog 2 isoform X1 [Pongo abelii]  
MGKIQSKHAAATKR**RESPEGDS**FVASGYACGRKSSEEAERRARDKQELPNGDPKEGPFREDQCPLQVAL  
PPEKAEGREHPGQLLSADDGERAANREGPRGPGGQRLNIDALQCDVSVEEDNRQEWTFITLYDFDNCCKVT  
REDMSSLMHTIYEVVDASVNHSLGSSKTLRVKLTVSPEPSSKRKEGPPAGQDREPTRCRMEGELAEPEPRV  
ADRRLSAHVRRPSTDPQPCSERGPYCDVENTERRNHLYDLAGIENYTSRFGPGSSPVQAKQEPQGRASHL  
QARSRSQEPDAHTVHRRSQVLVEHVVPASEPAARALDTPRPKGPEKQFLKSPKSGSGKPPGVPASSKSG  
KAFSYLPAVLPHQAPQDGHHLPPPPPPYPYGHKRYRQKGREGHSPLKAPHAQPATVEHEMVRELPP  
TPAGEGAVPVIQRHEHHHHHEHHHHHHHHFHPHS

## Mus musculus:

>BAB25908.1 unnamed protein product [Mus musculus]  
MGKIQSKHAAACKR**RESPEGDS**FVVPAYGSGRRGAEETDRRAGSGVHEHRSRDKQELPNGDPKEGPFWD  
KGSLEVVLPPPEKSEGEHGGQQLFSTDDEKAASREGPLRLSKKHLNIDALQCDVSVEEDNRQEWTFITLYD  
FDNSGKVTREDMSSLMHTIYEVVDASVNHSSGSSKTLRVKLTVSPEPSSKKECPLTQDREPTRGRTEIE  
LTDEPRVADRRLSAYSRRKNADPQPCSVRVYPYCDVENTERRNHLYDLAGIENYTSKFGPGSPPEQARQEH  
HGRATHIPSRSRSQESDAHAHHRSSQVLAEHVIPASEPATRALAAQPRIKGQEKQFLRSPKGPCKPLGT  
PGSGKPGKALSYCIQAVPLPQSAQDGHHLPPPPPPYPYGHKRYRQKAREGHSPLKGHGQPTMVEHEV  
VRDLPLMLGPEGYVMPVQRHEHHHHHEHHHHHHHHFHPHS

## Gallus gallus:

>XP\_040536747.1 protein naked cuticle homolog 1 isoform X1 [Gallus gallus]  
MGKLSKHAAVCKR**RESPEGDS**FAVNASLARKGLEDWMVKQKYSGGSGSSSGSSGLQGCQHRAACGLS  
SGRDLSEGEYRDSIGDEHFHLEVALPPEKTGVCVSGDEKKAEKESDTRTGSKKQLKFEELQCDVSVEEDN  
RQEWTFITLYDFDNNGRVTRREDITISLLHTIYEVVDASVNHSPSSKTLRVKLTVAAPDCSQKKKSILNHTD  
LQ SARHRAESKANEELASSEKKQRASLRVHQSENNPEQSECYRHCVDENIERRNHLYDLAGIENYTSKFG  
PGSPPAAQKQDPPSRVVSQTRSRSEHPTFAHHRKSQVVDPSHINLAESSYAKIAEIQRLNRQDSNKH  
FVRSPKAGKGNVAVPHSGRAVRNKPQGGAMPASPSARVGQNLPLYLPQSQVHHKHKQRAKENHQMCK  
TFQSPGTVVVEKEHVRDLPTVILYEGQVQGMIQRHEHHHHHEHHHHHHHHFYQT

## Xenopus laevis:

>XP\_041417043.1 protein naked cuticle homolog 1 isoform X6 [Xenopus laevis]  
MGKLYSKHAAVCKR**RESPEGDS**FAVNASLARKGIEDWLVKQKPPNSSLKTGYRITQRDSNGDICKYNIAN  
EHFHLVALPEEKSEGLFTSDDRKVDKNDGRVKKQHKFEELQCDVSVEEDNRQEWTFITLYDFDNSGRVT  
REDITLRLHTIYEVVDASVNHSLSSKTLRVKLSLAPDATLKKRTVLVNHAEQLQNGRHRSECKVTENLRG  
SEKKQQSGRLENVTEQTECLRQCDENIERRNHLYDLAGIENYTSRFGPGSPMCEKHDSQAKASNQMR  
SRSEHPTTISFHRRSQALDTGNSNMTELSHVKVAEVQQRQGENNKHVRSPRASNKNGLSTSQPGR  
TRNKPQSGVSMFVNPPSAFMGQSYLYHPVPQSVHRKSQKTKDGHQMRKAFQSPVNVVEKEHVRDLPSM  
VLYDDQVGHMIQRHEHHHHHEHHHHHHHHFYQK

## Salmo salar:

>XP\_014031575.1 protein naked cuticle homolog 1 isoform X2 [Salmo salar]  
MGKLSKHAAIKCR**RESPEGDS**FVNNACLARKGIDDWLVKQKYCTGSRLEQQDCHHTNKGSLSTRDLD  
KACAEGISDEHYRLVALPPEKTVDSCCEEKMQGRGSQAPTGTQKQLQFEELECAVSVEEDNRQEWTFIT  
LYDFDNNKGVTREDITISLLHTIYEVVDTSVNHSPSSKTLRVKLSVAPDSSQRWQSCQTGTADMPHPTK  
TDKCIEDLKSAEKKSALLRRHSDHHTIQHQVLTQQCGQSGRCQRHCVDENLERRNHLYDLAGIENYTS  
SRFGAAPTTEFVKAEQPTRPSNQTRSRSEHPEFNGHTYSHHRRSQVAMESSAAPGPDTLCPPRPSKDSGKH  
ALRSPKTHSRTHPTQTITGRVMRSGAPPPALPSQAPPHQSSAPYRRHKQRAKEGQQQYRALGAPVGSV  
VEKQVRVLPVSVLYEGGLAQMVQRHEHHHHHEHHHHHHHHFYQS

## Petromyzon marinus:

>XP\_032830383.1 protein naked cuticle homolog 2 [Petromyzon marinus]  
MGKIQSKQACARR**RESPEGDS**FVNNAYANRRGLEDPASVLPAPAYRDLVLYCGGVAKELFPPEVSSSLTLQT  
PLSGDEDAEDDGGGGDATDKKPADKAALNALNFQQLQCDVLVDNNRQEWTFITLYDFDSSGEVTREDI  
SSLMHTIYEVVGTGVNHTSGNSKTLRVKLTVTDPFGQRRRGAPHGIVDQPPSHGQGEATPEEARPQ  
KQQPQQQQQQPQQQPPQEQPEHPALRYAAKHGHAIVSISGRSRENKNTLTIKRTRTPQERAGWETSPSPRQ  
PAGGNPGCRRRCNGGSEMLTPSPGIQEVVGSILTLTPADGYFCVLINLAFHEGDSGVCGGPVVAASHGLA  
EGPPPGCPLLPVVRHRCPRVITCPLVLFPPPFASFVTRVQCMNMMSDLFARRHHNSGQPGQSATARHCYC  
VDENVERRNHLYDLAGMESYGTACPSFTQAGSPRMSRRRNAQHDPDTPAGQHGRRETVLHQNRNTPQDPS  
TAAAAAATAATTTTAARYVSRSRTKPAVTQAASSRPRGQRGRSVAYVQPLRPVGVGQQQQQQQQQQQ  
QPQQQHKHQRGREGCLSPGRPPYYQTRAPAGVDPVWRLEQPQHQQHHQHLQQQQQQQLLHVQQQQPGA  
MQTSMVLPVVMQRHEHHHHHEHHHHHHHHYHET

## Branchiostoma belcheri:

>XP\_019629286.1 PREDICTED: protein naked cuticle homolog 2-like isoform X2 [Branchiostoma belcheri]  
MGKIQSKHACKR**RESPEGDS**FVNNAHFNTGRYRGIEDFIARQKNATGLQLATYKGGRPPEPPAQEMEKA

GGCKPVPVGMADDCFPLEVQLPPETPDGRRTPFYVVGPNDDGSKSSVEEGEKPLGHVEEFECGVSVEGS  
DKQEWTFTLYDFDGKGKVTQEDFATLLHSIYEMVGNVHLPSKSSSKGNKNKTLKLRITVSPKNGKAPE  
KRVEITEMEQEVAKDEGDGSGNEGMSGECETPTRKKSCSANDQMRKLNLFHFVQKSEKQQQQQHRIAQL  
RRHSDSHNNHHHSADEVRRHRHSHHRFPSPRQRQQQLQRAREPRPPQLPGPGRRGPEPQQRSHHGVDYI  
LKFFPRKQPFSSIKVKRPRGPPQVKVT

### **Drosophila melanogaster:**

>NP\_001262029.1 naked cuticle, isoform B [Drosophila melanogaster]  
MAGNIVKWWKHILGGYKQFSVQECTTDSEELMYHQVRASSSCSAPPDLLLLVSRDNNIQLRSPVNIIT  
TPPGNASGAGSKQQSHHQTNHSSSGRSHPGHTAHPQDVSSGGSHSKHLRISSTNGKHGKYSNMQQQLPQ  
DEDVVDAAATMQQQHTGHASRHLHHHKEERIRLEETCDVSVVEGGKSSQPLQFSFTFYDLGDGHHGKIT  
KDDIVGIVYTIYESIGKSVVVPFCGSKTINVRLTVSPEGKSKSQPVVPVPAAGFSSSHASKLKKLPTGL  
AAMSKPLAGGGVSGGASALTTSAGNRRQHRYPKRLIKSDDEDDDSNSEKDDAAHAPAADQPSGSGTK  
ATGKSHHHQSQSARYHQKNNSRAEQCCTEQNTPDNGHNTYENMLNLKCKPEVDQVDCPSHRQHHQSHPN  
HQMRRQDDIYMKQATQVRVKMLRRARKQKTPSQCESHTATGSTTTTTTTTATPTLQYGLENTHVNYQPQSGR  
PAVAAQLQSTHGGAHPQHSSSSAGHRGQRSAAPPSSSSSQPPQPFRASPTAHTYLPSSAVGH

### **Hydra vulgaris:**

No homolog found.

### **Nematostella vectensis:**

>XP\_032232724.1 protein naked cuticle homolog 2 isoform X4 [Nematostella vectensis]  
MGKKYSKQAWIS**EGPEGGDC**VIENDTTTHSCAVSTSAEELSRA PSSHTADFTYKGYPVNLEWPLDYEEK  
ELPSKKDFFYDDFPLEVVELPDLPDGKNVEISFEREGLVEASTQTKPLKQETPECGMSVKSSASSDHQEWS  
YTLYDFEGGQGVTRDLRLNLVKSIEVLGKSVNNSRNQPKDPLKKLRVRLSVSKERGKGTEGDVPSRHEY  
TISAMATENKAPKKSTRTYHMERCDSM TVNPPSLENIPDKRKMVSLIMEQPGPTNGINCQSHRQKISCKR  
SSANRPAKPAVTAANTGNMDTPVVNDRGMYSCPKRMQTGFGECPNPPSPKEANDLSRVKQWVDQLCAAHEL  
ETVTRSKHRKSYRHTCRQGEPRHDLHRC PQYLDLATDHITYPYHVESQACLFGAASPKPHRRPKRGHHHS  
CKYNKDEVMCQRTIVHRHEHHSHHHYHHYKQEPSNK

### **Amphimedon queenslandica:**

No homolog found.

## Alignment

```
NP_001262029.1[D.melanogaster]      MAGNIVKWWKKHILGGYKQFS-VQECTTSEELMYHQVRSSSCSAPPDLLLVSERDNNI    59
XP_032232724.1[N.vectensis]         -----MGKKYSKQ---AWISK-----EGPEGDSVIENDTTTHS                30
XP_019629286.1[B.belcheri]          -----MGKLQSKH---ACKR-----ESPEGDSFVNAHFNTG                  30
XP_032830383.1[P.marinus]            -----MGKFQSKQ---ACRR-----ESPEGDSFVNVAYAN--                  28
BAB25908.1[M.musculus]               -----MGKFQSKHAAAACKR-----ESPEGDSFVVPAYGSG-                  32
NP_149111.1[H.sapiens]               -----MGKLQSKHAAAARKR-----ESPEGDSFVASAYASG-                  32
XP_002815428.2[P.abelii]             -----MGKLQSKHAATARKR-----ESPEGDSFVASGYACG-                  32
XP_014031575.1[S.salar]              -----MGKLHSHKAA-ICKPR-----ESPEGDSFVNVNACLA--                 30
XP_040536747.1[G.gallus]             -----MGKLHSHKAA-VCKPR-----ESPEGDSFAVNASLA--                 30
XP_041417043.1[X.laervis]            -----MGKLYSKHAA-VCKPR-----ESPEGDSFAVNASLA--                 30
                                     : * .                               . * .

NP_001262029.1[D.melanogaster]      QLRSPVUNIIT---TPPGN---ASGAGSKQQSHHQTNH-HSSGRSHPGHTAHPQDVSSGG    112
XP_032232724.1[N.vectensis]         C-AVSTSAEELSRAPSSHTADFTYKGYPVNLEWPL-----D---YEEKELPSKKD    77
XP_019629286.1[B.belcheri]          R-YRGIEDFIARQ-KNATGLQLATYKGRQPPPEPAQEM-----E---KAGGCKFPVVG    79
XP_032830383.1[P.marinus]            --RRGLEDVPAV-PPAYR-----DVLVYCGG                             52
BAB25908.1[M.musculus]               --RRGAETD-----RR-AGSGVEHRS---RDQK---ELLNGDPKEGP           66
NP_149111.1[H.sapiens]               --RKGAEEAE-----R-----RA---RDQK---ELPNGDPKEGP           58
XP_002815428.2[P.abelii]             --RKSSEAE-----R-----RA---RDQK---ELPNGDPKEGP           58
XP_014031575.1[S.salar]              --RKGIDDWLVKQ-KYYCT-----GSRL-EQQCDCHTNKCGLST---RDLLDKACAEG    76
XP_040536747.1[G.gallus]             --RKGLEDWMVKQ-KYSGSGG-SSSGGSSS-GLQGCQHRAACGLSSG---RDLSGGEYRDS    83
XP_041417043.1[X.laervis]            --RKGIEDIWMVKQ-KPPNSSL-KT-----GY-----RITQ---RDSNGDICKYN    67

NP_001262029.1[D.melanogaster]      SHSKHLRISSTSNKGKGYSNMQQLPQDEDDVDAATMQ-QQOHTGHA-HS---RHLHH    167
XP_032232724.1[N.vectensis]         FFYDDFPLEV-----VELPDL-----PDGKNVE---ISFEREGLVEASTQT----- 115
XP_019629286.1[B.belcheri]          MADDCCFPLEV-----QLPPETPDGGRTPFVYVVGPDNGDSKSS---VEE        120
XP_032830383.1[P.marinus]            VAKELFPEEV-----SSLSTLQTLPLSPGEDEA-----EDDGGGDATDKKPADK     96
BAB25908.1[M.musculus]               FWDDKGSLEV-----VLPEKSEGH-EGQGQLFTDDGEKAASREG---PLR        109
NP_149111.1[H.sapiens]              FREDQCPLQV-----ALPAEKAEGR-EHPGQLLSADDGERAANREG---PRG        101
XP_002815428.2[P.abelii]            FREDQCPLV-----ALPPEKAEGR-EHPGQLLSADDGERAANREG---PRG        101
XP_014031575.1[S.salar]              ISDEHYRLEV-----ALPPEKTVDS-CC-----VEEKMQGRGSA---PT        112
XP_040536747.1[G.gallus]            IGDEHFHLEV-----ALPPEKTDGV-CS-----GDEKKAESDST---RT        119
XP_041417043.1[X.laervis]            IANEHFHLEV-----ALPEEKSEGL-FT-----SDDRKVDKDNDG---R        102

NP_001262029.1[D.melanogaster]      HKEERI-RLEEFTCDVSVVEGKSSQPLQFSFTFYDLDGHHGKITKDDIVGIVYTIYESIG    226
XP_032232724.1[N.vectensis]         ---KPL-KQETPECGMSVKAS-SDHQEWSYTYLDFEG-QQVTRREDLRNLVKSIEYVLG    169
XP_019629286.1[B.belcheri]          GEKPG-LHVEEFECGVSV--G-SDKQEWTFITYLDFDG-KGKVTQEDFATLLHSIYEMVG    175
XP_032830383.1[P.marinus]            AALNALNFQQLQCDVLVQ--D-DNRQEWTFITYLDFDG-SGEVTREDISSLMHTIYEVVG    152
BAB25908.1[M.musculus]              LSKKHLN-IDALQCDVSV--E-DNRQEWTFITYLDFDN-SGKVTREDMSSLMHTIYEVVD    164
NP_149111.1[H.sapiens]              PGQQLN-IDALQCDVSV--E-DDRQEWTFITYLDFDN-CGKVTREDMSSLMHTIYEVVD    156
XP_002815428.2[P.abelii]            PGQQLN-IDALQCDVSV--E-DDRQEWTFITYLDFDN-CGKVTREDMSSLMHTIYEVVD    156
XP_014031575.1[S.salar]              GTQKQLQ-FEELECAVSV--E-DNRQEWTFITYLDFDN-NGKVTREDITSLHTIYEVVD    167
XP_040536747.1[G.gallus]            GSKKQLK-FEELQCDVSV--E-DNRQEWTFITYLDFDN-NGRVTREDITSLHTIYEVVD    174
XP_041417043.1[X.laervis]            -VRKQHK-FEELQCDVSV--E-DNRQEWTFITYLDFDN-SGRVTREDITRLHTIYEVVD    156
                                     : * : . : : : : * : : . : : : : * : : : : : : : : : : : : : :

NP_001262029.1[D.melanogaster]      KSVVPHC-----GSKTINVRLTVSPEGKSKSQPVVPVPAAGFSSSHASKLKLPTGL      280
XP_032232724.1[N.vectensis]         KSVNNSRNQP--KDLPLKLRVRLSVSKERGKGTGEDVPSRH-EY-----          210
XP_019629286.1[B.belcheri]          NSVHLPSKSSSKGNKNKTLKRLTVSPKNGKAPEKRVETEMEQUEV-----          221
XP_032830383.1[P.marinus]            TVSNHSTG-----NSKTLRVKLTVTPDPGQRRRGAPHGIVDQ-----          190
BAB25908.1[M.musculus]              ASVNHSSG-----SSKTLRVKLTVSPPESSK-KECPLTGQDRE-----          201
NP_149111.1[H.sapiens]              ASVNHSSG-----SSKTLRVKLTVSPPESSKRKEGPPAGQDRE-----          194
XP_002815428.2[P.abelii]            ASVNHSLG-----SSKTLRVKLTVSPPESSKRKEGPPAGQDRE-----          194
XP_014031575.1[S.salar]              TVSNHSPS-----SSKTLRVKLSVAPDSSQRWQCTGQTADMP-----          205
XP_040536747.1[G.gallus]            ASVNHSPS-----SSKTLRVKLTVAPDGSQKKSKILLNHTDLQ-----          212
XP_041417043.1[X.laervis]            ASVNHSLS-----SSKTLRVKLSLAPDATLKRTVNLVNAELQ-----          194
                                     **                               * : : : : : : : : : : : : : :

NP_001262029.1[D.melanogaster]      AAMSKFLAGGVGSGGASALT-----TSAGNRRQHRYRPRKLIKSDDEDDDSNSE---    330
XP_032232724.1[N.vectensis]         -----T-ISAMATENKAPK--KSTRTYHMERC-----                    234
XP_019629286.1[B.belcheri]          ---AKD-EDGDSGNEGMEGCEPTPRKKSCSANDQMRKLNLEHFVQKSIEKQQQQQQHRI    277
XP_032830383.1[P.marinus]            -----PPSHQGEETATPEEARQPQ-K---QQQPQQQQQ--PQQPQQQQQPEH        232
BAB25908.1[M.musculus]               -----PTRG-RTEIELT-DEPRVAD-R---RL-----                    222
NP_149111.1[H.sapiens]              -----PTRC-RMEGELA-EEPRVAD-R---RL-----                    215
XP_002815428.2[P.abelii]            -----PTRC-RMEGELA-EEPRVAD-R---RL-----                    215
XP_014031575.1[S.salar]              -----HPRT-KT-DKCI-EDLKSAB-K---KS-----                    225
XP_040536747.1[G.gallus]            -----SARH-RAESKAN-EELRSSE-K---KQ-----                    233
XP_041417043.1[X.laervis]            -----NGRH-RSECKVT-ENLRGSE-K---KQ-----                    215

NP_001262029.1[D.melanogaster]      -----K-E-----KDAAHAPAADQPSGS---          347
XP_032232724.1[N.vectensis]         -----DSMTVNPPSL-----EN-----                    246
XP_019629286.1[B.belcheri]          AQLRRHSDSHNHHHSADSVRRHRHSH--RPPSRQRRQQQLQRAREPRPQPPL---PG    332
XP_032830383.1[P.marinus]            PALRYAA--KHG---HAVSISGRSRENKNTLTKTRTPQGERAGWETSPSPQAGGNPG    287
BAB25908.1[M.musculus]               -----SA-----YSRK-----                    228
NP_149111.1[H.sapiens]              -----SA-----HVRR-----                    221
XP_002815428.2[P.abelii]            -----SA-----HVRR-----                    221
XP_014031575.1[S.salar]              -----RA-----LLRR-----                    231
XP_040536747.1[G.gallus]            -----RA-----SLRY-----                    239
XP_041417043.1[X.laervis]            -----QG-----SGRL-----                    221

NP_001262029.1[D.melanogaster]      -GTKATGKSHHQ-SQSARYHQKNNRAEQCCTEQNTPDNGHNTYENMLN-----LK     397
XP_032232724.1[N.vectensis]         -----IPDKRK-----MVSLIMEQPGPTNGINCQSHRQKISCKRSSANR        285
XP_019629286.1[B.belcheri]          PGRRGEPQ-----QRS-----HHGDVYILKFPKRPQFSIK--VK--RFRGPPQ-    371
XP_032830383.1[P.marinus]            CRRCGNGGSEMLTPSPGIQE-----VVGSIILT-TPADGYFCVLINLA--FHEDGDSV    337
BAB25908.1[M.musculus]               -----PNADPQ-----                    234
NP_149111.1[H.sapiens]              -----PSTDPQ-----                    227
XP_002815428.2[P.abelii]            -----PSADPQ-----                    227
XP_014031575.1[S.salar]              -----HHSDDH-----                    237
```

|                                |                                                               |     |
|--------------------------------|---------------------------------------------------------------|-----|
| XP_040536747.1[G.gallus]       | -----HQSENN-                                                  | 245 |
| XP_041417043.1[X.laavis]       | -----ENV-                                                     | 224 |
|                                |                                                               |     |
| NP_001262029.1[D.melanogaster] | -----QVDCPSHRQ-----                                           | 413 |
| XP_032232724.1[N.vectensis]    | PAKPAVTAANTGNMDTPV-----VN-----DRGMYSCPKRMQTGPGECPNPPSPKEANDLS | 335 |
| XP_019629286.1[B.belcheri]     | -----V-KVT-----                                               | 375 |
| XP_032830383.1[P.marinus]      | CGGPVV-AASHGLAEGPPPGCLLPVVRRCPRVITCPLVLFFPP-----PFA-----      | 384 |
| BAB25908.1[M.musculus]         | -----                                                         | 234 |
| NP_149111.1[H.sapiens]         | -----                                                         | 227 |
| XP_002815428.2[P.abelii]       | -----                                                         | 227 |
| XP_014031575.1[S.salar]        | -----TI-----                                                  | 239 |
| XP_040536747.1[G.gallus]       | -----                                                         | 245 |
| XP_041417043.1[X.laavis]       | -----                                                         | 224 |
|                                |                                                               |     |
| NP_001262029.1[D.melanogaster] | -----HHQSHPNHQMRRQDDIYMKQATQVRKM                              | 439 |
| XP_032232724.1[N.vectensis]    | RVKQWVDQLCAAHELETVTRSKHRK----SYRHTCRQGEPRHDLHRCPOYLDLATDHI--  | 389 |
| XP_019629286.1[B.belcheri]     | -----                                                         | 375 |
| XP_032830383.1[P.marinus]      | ---STVRVQCPMNMSDLFARRRHSNGQPQGSATARHCYCDENVERRNHLYDLGAMESYG   | 441 |
| BAB25908.1[M.musculus]         | -----PCSVRVPCVDENTERRNHYLDLAGIENYT                            | 264 |
| NP_149111.1[H.sapiens]         | -----PCSERGPYCDENTERRNHYLDLAGIENYT                            | 257 |
| XP_002815428.2[P.abelii]       | -----PCSERGPYCDENTERRNHYLDLAGIENYT                            | 257 |
| XP_014031575.1[S.salar]        | -----QHQLVTQQGGQSRGCRHRCVDENTERRNHYLDLAGIENYT                 | 280 |
| XP_040536747.1[G.gallus]       | -----PEQSECYRHCVDENIERRNHYLDLAGIENYT                          | 276 |
| XP_041417043.1[X.laavis]       | -----TEQTECLRQCVDENIERRNHYLDLAGIENYT                          | 255 |
|                                |                                                               |     |
| NP_001262029.1[D.melanogaster] | LRRAR-KQKKTIPSQCESHTATGTT---TTTTATPTL---QYGL-----ENTHVNYQ-    | 485 |
| XP_032232724.1[N.vectensis]    | -----                                                         | 389 |
| XP_019629286.1[B.belcheri]     | -----                                                         | 375 |
| XP_032830383.1[P.marinus]      | TPACSPTQAGSPRMSR-----RRNAQHDPTPAG-QHGRRETVLHQRNRTPOD          | 488 |
| BAB25908.1[M.musculus]         | SKFG---PGSPPEQARQEHHRATHIPSRSRSQESDAHA--IHHRRSQVLAHVIPASE     | 318 |
| NP_149111.1[H.sapiens]         | SRFG---PGSPPVQAKQEPQGRASHLQARSRSQEPDTHA--VHHRRSQVLEHVVPASE    | 311 |
| XP_002815428.2[P.abelii]       | SRFG---PGSSPVQAKQEPQGRASHLQARSRSQEPDAHT--VHHRRSQVLEHVVPASE    | 311 |
| XP_014031575.1[S.salar]        | SRFG---AAPTTEPVKAEPQTRPSN-QTRSRSHEPENGHTYSHHRSSQVAMESSAA---   | 332 |
| XP_040536747.1[G.gallus]       | SKFG---PGSPPAQKQDPPSRVVS-QTRSRSHEPETFH--AHHRKSQVVDPSHINLAE    | 329 |
| XP_041417043.1[X.laavis]       | SRFG---PGSPPMCKHDSQAKASN-QMRSRSHEPETIS--FHHRRSQALDTGNSNMTE    | 308 |
|                                |                                                               |     |
| NP_001262029.1[D.melanogaster] | PQSGRPVAAQLQSTHGAHH-----PQHSSSSAG-HRGQRS--AAPP-----           | 525 |
| XP_032232724.1[N.vectensis]    | -----TYPYHVESQA                                               | 399 |
| XP_019629286.1[B.belcheri]     | -----                                                         | 375 |
| XP_032830383.1[P.marinus]      | PSTAAAAAATAATTTAARYVSRSSRTKGPVAVTQAASSRPGRGRSVPAYVQPLRPVG     | 548 |
| BAB25908.1[M.musculus]         | ---PATRALAAQPRIKGQEKQFLRSPKGPGLGTGSGKPGKALSYCLQAVPLP---QS     | 372 |
| NP_149111.1[H.sapiens]         | ---PAARALDTQPRPKGPEKQFLKSPKGSKPPGVPAASSKSGKAFSYLLPAVLPP---QA  | 365 |
| XP_002815428.2[P.abelii]       | ---PAARALDPQPRPKGPEKQFLKSPKGSKPPGVPAASSKSGKAFSYLLPAVLPH---QA  | 365 |
| XP_014031575.1[S.salar]        | ---PGDPTLCPPRPSKDSGKHALRSPKTHSRHTPTTT-GRVMRSR---GAPP---PP     | 381 |
| XP_040536747.1[G.gallus]       | SSYAKIAEIQQLRLNQDSNKHFRVSRPKAQGNVAPV-HS-GRAVRNKPFGCGAMPMAFPS  | 387 |
| XP_041417043.1[X.laavis]       | LSHVKVAEVQQRQQRQENNKHFVRSRASNKNHGLSTSQ-PGRTRNKPQSGVSMFVNPPS   | 367 |
|                                |                                                               |     |
| NP_001262029.1[D.melanogaster] | --HSSHSSQPPQPPRASPTAHTY-----LPSAVGH-----                      | 553 |
| XP_032232724.1[N.vectensis]    | CLFGAASPK-----PHRR-----                                       | 414 |
| XP_019629286.1[B.belcheri]     | -----PK                                                       | 375 |
| XP_032830383.1[P.marinus]      | VQQQQAQQQ---QQQQPQQQHKHQRQREGCLSPGRPPYQTRAPAGVPDVRWLEQFQ      | 605 |
| BAB25908.1[M.musculus]         | AQDGHHLQPFPQPFPQPYGHKRYRQKAREGHSPL-----KG-HGQ-PTMVEH-----     | 418 |
| NP_149111.1[H.sapiens]         | PQDGHHLQP-----PPPYGHKRYRQKREGHSPL-----KAPHAQ-PATVEH-----      | 408 |
| XP_002815428.2[P.abelii]       | PQDGHHLQPFPQPFPFPQPYGHKRYRQKREGHSPL-----KAPHAQ-PATVEH-----    | 412 |
| XP_014031575.1[S.salar]        | ALPSQ---APPHQ---SSAPYRRHKQRAKEGQQQY---RALGAPVGSVVEK-----      | 423 |
| XP_040536747.1[G.gallus]       | ARVGQNLPLYLPLQ---SQQVHKHKKQRAKENHQQMC-----KTFQSP-GTVVEK-----  | 431 |
| XP_041417043.1[X.laavis]       | AFMGQSYLYHVPF---PQSVHRKSKQKTKDGHQMR-----KAFQSP-VNVVEK-----    | 411 |
|                                |                                                               |     |
| NP_001262029.1[D.melanogaster] | -----                                                         | 553 |
| XP_032232724.1[N.vectensis]    | RGHHHSC-----KY-NKDEVMCQRTIVHR---HEHHSHHHHHYHYEK               | 452 |
| XP_019629286.1[B.belcheri]     | -----                                                         | 375 |
| XP_032830383.1[P.marinus]      | HQHHHQHLQQQQQQQLHVQQQPGAMQTSMLVPVMQRHEH---HYEHSHHHHHYHYHYE    | 662 |
| BAB25908.1[M.musculus]         | -----EVVRDLPPMLGPEGYVMPVQVQREHHHHHHHHHHHHHHHHFHPs--           | 461 |
| NP_149111.1[H.sapiens]         | -----EMVRELPPTPAGEGYAVPVIQREHHHHHHHHHHHHHHHHFHPs--            | 451 |
| XP_002815428.2[P.abelii]       | -----EMVRELPPTPAGEGYAVPVIQREHHHHHHHHHHHHHHHHFHPs--            | 455 |
| XP_014031575.1[S.salar]        | -----EQVRVLPSVLLYEGGLAQMVQRH-----EHHHHHHHHHHYHHFYQ            | 463 |
| XP_040536747.1[G.gallus]       | -----EHVRDLPTVILYEGQVGMQIRH-----EHHHHHHHHHHYHHFYQ             | 471 |
| XP_041417043.1[X.laavis]       | -----EHVRDLPSMVLVYDDQVGMQIRH-----EHHHHHHHHYHHFYQ              | 451 |
|                                |                                                               |     |
| NP_001262029.1[D.melanogaster] | -----                                                         | 553 |
| XP_032232724.1[N.vectensis]    | QEPSNK                                                        | 458 |
| XP_019629286.1[B.belcheri]     | -----                                                         | 375 |
| XP_032830383.1[P.marinus]      | T-----                                                        | 663 |
| BAB25908.1[M.musculus]         | -----                                                         | 461 |
| NP_149111.1[H.sapiens]         | -----                                                         | 451 |
| XP_002815428.2[P.abelii]       | -----                                                         | 455 |
| XP_014031575.1[S.salar]        | S-----                                                        | 464 |
| XP_040536747.1[G.gallus]       | T-----                                                        | 472 |
| XP_041417043.1[X.laavis]       | K-----                                                        | 452 |
