# Supplementary material for: An Evolutionary Perspective on the Origin, Conservation and Binding Partner Acquisition of Tankyrases
Source: MDPI journal article supplement (doi:10.3390/biom12111688), 2022-11-15
Supplement: s1 [file s1]

# TRF1

## Homo sapiens:

>sp|P54274.3|TERF1\_HUMAN RecName: Full=Telomeric repeat-binding factor 1; AltName: Full=Telomeric protein Pin2/TRF1  
MAEDVSSAAPSFPSCATAGSRADPTEEQMAETERNDEEQFECQELLECCQVQVGAPEEEEEEDAGLVAEAEV  
EAVAAGWMLDFLCLSLCRAFRDGRSEDFRRTNSAEAIHGLSSLTACQLRTIYICQFLTRIAAGKTLDA  
QFENDERITPLESALMIWGSIEKEHDKLHEEIQNLIKIQAIACVMENGNFKEAEVFERIFGDPNSYMPFKSK  
KSKLMIISQKDTFHSFFQHFHSYNHMEKIKSYVNYVLSEKSSSTFLMKAAAKVVESKRTRTITSQDKPSG  
NDVEMETEANLDRKSVSDKQSAVTESSEGTVSLLRSHKNLFLSKLQHGTTQQQDLNKKERRVGTLPQSTKK  
KKESRRATESRIPVSKSQPVTPEKHRARKRQAWLWEEDKNLRSGVRKYGEGNWSKILLHYKFNNRTSVML  
KDRWRTMKLKLISDSSED

## Pongo abelii:

>PNJ54419.1 TERF1 isoform 3 [Pongo abelii]  
MAEDVASAAPSFPSCATAGSRADPTEEQMAETERNDEEQFECQELLECCQVQVGAPEEEEEEDAGLVAEAEV  
AAGWMLDFLCLSLCRAFRDGRSEDFRRTNSAEAIHGLSSLTAYQLRTIYICQFLTRIAAGKTLDAQFE  
NDERITPLESALMIWGSIEKEHDKLHEEIQNLIKIQAIACVMENGNFKEAEVFERIFGDPNSYMPFKSK  
LMIISQKDTFHSFFQHFHSYNHMEKIKSYVNYVLSEKSSSTFLMKAAAKVVESKRTRTITSQDKPNGNDV  
EMTETEANLDRKSVSDKQSAVTESSEGTVSLLRSHKNLFLPKLQHGTEQQDLNKKERRVGTLPQSTKKKE  
SRATESRIPVSKSQPVTPEKHRARKRQAWLWEEDKNLRSGVRKYGEGNWSKILLHYKFNNRTSVMLKDR  
WRWTKKLLKICSDSED

## Mus musculus:

>NP\_033378.1 telomeric repeat-binding factor 1 isoform 1 [Mus musculus]  
MAETVSSAARDAPSRGWTDSDSPEQEVEGDAAELLQCQLQGTPREMENAELVAEVEAAGWMLDFLC  
LSLCRAFRDGRSEDFRTRDSAEAIHGLHRLTAYQLKTVYICQFLTRVASGKALDAQFEVDERITPLES  
ALMIWNISIEKEHDKLHDEIKNLIKIQAAVAVCMEIGSFKEAEVFERIFGDPPEFYTPLERKLLKIIISQKDV  
FHSLLQHFHSYSCMMEKIQSYVGDVLSEKSSSTFLMKAATKVVENEKARTQASKDRPDATNTGMDTEVGLNK  
EKSVMGQSTTETETPLDVTVSSIRSHKNALSQLKHRRAPSDFSRNEARTGTLQCETTMERNRRTSGNRNLC  
VSENPQPTDDKSGRRKRQTWLWEEDRLKCGVKKYGEGNWKILLSHYKFNNRTSVMLKDRWRTMKRLKLI  
S

## Gallus gallus:

>NP\_989711.2 telomeric repeat-binding factor 1 [Gallus gallus]  
MSAEGREREGLVPFLPSALAEAAADWVLEFSCCCLCRYFVEECEAEFRWRDVAQAVNSGFSKVTTHQ  
KMVYVLQCLLIRIAEGKRLECHFENDTTISPLESALSFWTLLEREESKLNLTHEEIRRLIQIQVAVVYME  
KGYEKEAAEVLERLFTDSESHKPLRMKLAIAIVKSKDPYVPLLQSFYSYLLLSKVKSYYVKLFLENRTNLF  
LQAATQVSESGGEVRLQNKTLNVKEERENNLEAKQRPAEELRSTTDWLTGDISSRVPPSKKGCRTSS  
VQRLLDKLVNEERGDDLPCSRRRQPWTYEEDKKLKSGVREFGVGNWTKILIHGDFNNRTSVMLKDRWRTL  
CKIK

## Xenopus laevis:

>ABA29525.1 telomeric repeat binding factor 1 [Xenopus laevis]  
MEEETDGPFFDDTAAVATNMWCMDFMFASMCIFYFREDRTEDFQRSTHMLEWLLEGSQKIDAHRRKTIPIAQF  
LMRVAEGKNLDSQFDTDESLTPLETALMAFNQIEEEEDLKHLEIEILLKVQAVVTCMEKGRFKLSAEI  
LDRLPFKESGSKNKLRMKLTMLIEKKDPIHEFLQNFTYAQMKKIKSYIALKMKERPSVFLKAAAKVVEA  
TAKELLDIQSSEDECEQQTNESLENKDDNSSSEYEERDVLSLSNINHVENKDVSSSDYEEATEQLKVCN  
RDINQNELNTNINIQETTEKSTKRHQRLFSIAQRTFWMNPKDCTSKRLLSSINIGKNSKENQENVKDSL  
TEKPLNLSKRRQHMTWEDELLKKGVKRFVGVNWSKILLHYEFNRNTGVMLKDRWRTMKRLKIVDSDCDL

## Salmo salar:

>XP\_014015369.1 PREDICTED: telomeric repeat-binding factor 1 [Salmo salar]  
MEADPNNRKLTITSTTDENVCFSDVATVAKRWMDFSFVSLCQFFKEKGKFEFPNQTISTLETIIDGSPHL  
NTEQKQKRQICGFLARIMHGKHLDSFDRDERLSPLMSAVRVWASQKETVANLSLFQHVNTNLLYVQSVAV  
CLEKGDCGMASSALKWLEEECEIPQNLGIKLSLIVSKRDITYHPFLNFSWNRLLENIQTFLLDRFLEEHP  
DFLLQAATKVVKAQGETGEDSETQEASYTTSRSSEHSKNVQETSVLMRPKKLLSTRNIHPWKPESGKKP  
ALTFMRKRVSTRITYRRALPETTLNNTSLNNTLNATNRKTHGRWPDLDMALKAGVRRHGEKWSRIL  
QEHDFQGRGTGVQLKDRWRVLKKAHVNSS

## Petromyzon marinus:

>XP\_032808952.1 uncharacterized protein LOC116941715 isoform X1 [Petromyzon marinus]  
MAEVRDGLVSEYLSAPLLRERGRDLLFDHLYRLAAAYFELGDYERLSGVYRAASGALQFLREEQPRQVQW  
KLILQIMEMVMRGQFFDPVREGNQMLLEGAVEMVMDLGRECQLEPEVTQEVTRILRLKLLTEARVQVQRNE  
QLQTDLVDVPWYSLDLKLPHILRFIDSVPPSSQASSYVQLLKESLPQETFPANKTNGGKFLHKDHIEAFLS  
IADCREDAENFTFEVLLLTDDVPLSLKLALPAMGAESSPGSELRREDSSVPEGAAANNSVAPARVIVSPQK  
QLSPAKRLMGPETPRHHVPEDSRREEKKVAPLQATPSPFPFPPLSPLLLSDSEBLLPMRIVQSKRSDQS  
TAAACDDAHQMSTTDFIPSTYEEIPPTAPAKDVAGPGSTPPILAIICRKTRSDSPRVVEAAATPRIV  
EDGEVAGSGKPPAATISPAKATCGKWDKGHGHPTRNHVERNGRFPDGFSSABIRRLSLPIMIKDEWSDDE  
DLFGPSKVAGRQSKFGSSARKKKMTTETETQCLKEGVARFVGVNWSKIKRHYLSRTAVQLKDRWRNISK

## Branchiostoma belcheri:

>XP\_019634930.1 PREDICTED: telomeric repeat-binding factor 2-like [Branchiostoma belcheri]  
MIFTCRYEEDGDITALESALPIFDSLVSDFAVPEDQVSEARGLVMTQSVLVCCRGGDFQAAEQVFSRWV  
VPGAATTAKRKKLRKSVQEVMSRGNPDHSLVQVRCSDYDKFLTWMIQFLHLIVDGFSLFLLKAAQKRLRA  
RIDAGDGTAEPEESLSQSESDSDMYETPSENAAPPKEQEEEFVFNPSALLRECFLVMAKEERSGSEWTDV  
NGDYRYNLRGDLAKSREAKTSGAASEKDLEQNREEKTSGSGVRKSPRKHQQAANKSEPTERRSPRKKTS  
ETTGRHEFATHGAVQSRGEKRRKQTDDEENFEKTENRKKTTQTSAPSTDNRNPPGRMQKSGDGTGKDIRYWM  
SDQPSGTSVGRKKVHKQAERTRLVESDESSESEETRKENVQTGSKSKRPDRDRPEYGNQVKETWSSDEETFPA  
PVKKKYIYDSDSDSENFPALPCSAASLVVPRRLVQKREPLDITSGKQVRSRFRWAEYEVENLIKGVQ  
EYGVGHWSEILDNYRFKNRTNVNLKDKRWQLVKSQGVREFP

## Drosophila melanogaster:

No homolog found.

### **Hydra vulgaris:**

>XP\_012558972.1 PREDICTED: putative uncharacterized protein DDB\_G0282499 [Hydra vulgaris]  
MSEQQDTLYNTDFLIMEYFAHKIIKMFLEEYKGCINNNMVHLMNAWKVMVHSSDGIFSDEMRNLYILISL  
IVTCCFSSISQVDQLNLMLEMINTQQQEFQSATEDVSNVCKFLHTKIFLKLLDNGCGKGAKQYLRDHDVL  
CRDSLEQLVSKDSL PENLKPENLKNVCFSYVSEVYKKIPRSRLVLLFDNFMKEKNNTRFKKGKSFLDKVDE  
SDIDISKEVENALPQSQVMTLIPKETDTTYSSSSEPMFNSYQSSTTYVEKESGTFKDSPCIPTKHKHLSND  
SFKEIVDLKYSKNHLKSFYKYGSKYIYNTRSDKVTSNLNSHMIISDFKKSFTFONSKKSDDDMIFDDV  
RSDISDSQTENLGIKCYVDINKVISPKYIEKKANDTQNTYCEQNRSNNDNNETEKNNTSNHSSKLQIGCQ  
NLTELNNENPCSVVSNNISIPGKKKKVVENIHTNNKACHILTNNQINYNKYNLKTKNSDQOTSADSDDI  
YIKTSADLACVKNIDSLREDVTSKDTSIIVTPASLKLLGDEQQNDSKVVFECVCQSSEKKTVSSSVANKK  
SIVNSDESGTSCKWSDDEFVKYNPTVRVPFSKDEEKYIKEGIIKFGIGNWCCKIKRSYPFHPNRTNVSIIK  
DKYRTMKRQGIL

### **Nematostella vectensis:**

No homolog found.

### **Amphimedon queenslandica:**

No homolog found.

## Alignment

|                            |                                                                 |     |
|----------------------------|-----------------------------------------------------------------|-----|
| XP_012558972.1[H.vulgaris] | -----                                                           | 0   |
| XP_019634930.1[B.belcheri] | -----                                                           | 0   |
| XP_032808952.1[P.marinus]  | -----                                                           | 0   |
| XP_014015369.1[S.salar]    | -----MEADPNNRTLTI-----                                          | 12  |
| ABA29525.1[X.laervis]      | -----                                                           | 0   |
| NP_989711.2[G.gallus]      | -----MSE                                                        | 3   |
| NP_033378.1[M.musculus]    | MAETVSSAARDAPSPREGWTDSD-----SPEQEEVGDDAELLQCQLQLGTTPREM         | 48  |
| P54274.3[H.Sapiens]        | MAEDVSSAA---PSPGCAAGGADPTTEQMAETERNDEEQFECQELLECCVQVGAPEEE      | 57  |
| PNJ54419.1[P.abelii]       | MAEDVASAA---PSPGCAAGGADPTTEQMAETERNDEEQFECQELLECCVQVGAPEEE      | 57  |
| XP_012558972.1[H.vulgaris] | MSEQQDTLYN-----TDFLIMEYFAHKIIMKFL-----EYKGCINNMMVHLMNA          | 45  |
| XP_019634930.1[B.belcheri] | -----                                                           | 0   |
| XP_032808952.1[P.marinus]  | MAEVRDGLVSEYLSAPLLRERGRDLLFDHLYRLAAAYFELGDYERLSGV-----          | 49  |
| XP_014015369.1[S.salar]    | -----TSTTDENVCFSDVATVAKRWMIDFSFVSLCQFFKEGKFEEFNQTI-----ST       | 59  |
| ABA29525.1[X.laervis]      | MEEETDG-----PPFDDTAAVATNMWCDMFASMCFFYFREDRTDFQRST-----HM        | 47  |
| NP_989711.2[G.gallus]      | AGREREGLVPFLPSALAEAAVADWVLEFSCCCLCRYFVECEAEFRWR-----DV          | 55  |
| NP_033378.1[M.musculus]    | -----ENAEI-----VAEVEAVAAGWMLDFLCLSLCRAFRDGRSEDFRTR-----DS       | 91  |
| P54274.3[H.Sapiens]        | EEEEEDAGL-----VAEAEAVAAGWMLDFLCLSLCRAFRDGRSEDFRTR-----NS        | 104 |
| PNJ54419.1[P.abelii]       | -----EEDAGL-----VAEAEAVAAGWMLDFLCLSLCRAFRDGRSEDFRTR-----NS      | 101 |
| XP_012558972.1[H.vulgaris] | WKVMVHSSDGIFSDEMRNL-----YILISLIVTCCFSSISQVDQLNMLEMINTQG         | 96  |
| XP_019634930.1[B.belcheri] | -----MIIFICRYEEDGIDTALESALPIFDSLV                               | 28  |
| XP_032808952.1[P.marinus]  | YRAASGALQFLREEQPRQVQMKLIQLMEMVMRGQFFDPVREGNQ-----LEGAVEMVDMLG   | 107 |
| XP_014015369.1[S.salar]    | LETTIDGSPHLNTEQKQKR-----QICQFLARIMHGKHLNDSFDRDERLSPILMSAVRVMSQK | 117 |
| ABA29525.1[X.laervis]      | LEWLLEGSQKIDAH-RKTI--PIAQFLMRVAEGKNLDSQFDTDESLTPLETALMAFNQIE    | 104 |
| NP_989711.2[G.gallus]      | AQAVNSGFSKVTTQKKMV--YLCQLLIRIAEGKRLECHFENDTITPLESALSFWTLL       | 113 |
| NP_033378.1[M.musculus]    | AEAITHGLHRLTAYQLKTV--YICQFLTRVAGSKALDAQFVERDITPLESALMIWNSIE     | 149 |
| P54274.3[H.Sapiens]        | AEAITHGLSSLTACQLRTI--YICQFLTRIAAGKTLDAQFENDERITPLESALMIWGSIE    | 162 |
| PNJ54419.1[P.abelii]       | AEAITHGLSSLTAYQLRTI--YICQFLTRIAAGKTLDAQFENDERITPLESALMIWGSIE    | 159 |
|                            | * :                                                             |     |
| XP_012558972.1[H.vulgaris] | QEFQSATEDVSNVCKFLHTKIFLKLNDGCGKGAK-----QYLRDHDVL                | 140 |
| XP_019634930.1[B.belcheri] | SDPAVPEDQVSEARGLVMTQSVLVC-----CRGG-----DF--QAAEQVFSRVWVP        | 72  |
| XP_032808952.1[P.marinus]  | RECQLEPEVTQEVTRILRLKLLTEA-RVQVQRNEQLQTDLDVPWYSLDLKPHILRFIDSV    | 166 |
| XP_014015369.1[S.salar]    | ETVANL-SLFQHVTNLLYVQSAVVC-----LEKG-----DC--GMASSALKWLEEE        | 160 |
| ABA29525.1[X.laervis]      | EEDD-LKHLHEEIELLLKVQAVVC-----MEKG-----RF--KLSAEILDRLFKE         | 147 |
| NP_989711.2[G.gallus]      | REESKLNTLHEEIRRLLIQIVVAVY-----MEKG-----YY--KEAAEVLERLFTD        | 157 |
| NP_033378.1[M.musculus]    | KEHD--KLHDEIKNLIKQAVAVC-----MEIG-----SF--KEAEVFERIFGD           | 190 |
| P54274.3[H.Sapiens]        | KEHD--KLHEEIQNLIKQAIAVC-----MENG-----NF--KEAEVFERIFGD           | 203 |
| PNJ54419.1[P.abelii]       | KEHD--KLHEEIQNLIKQAIAVC-----MENG-----NF--KEAEVFERIFGD           | 200 |
|                            | . . . :                                                         |     |
| XP_012558972.1[H.vulgaris] | CRDS---LEQLVSKDSLLENLKPENLKNVCFSYVSEYKKIPRSRLVL---LFDNFMKEK     | 194 |
| XP_019634930.1[B.belcheri] | GAA-----TTAKRKKL-RSKQVEVMRSGNPDHSLVQVRCSYDKFLTW                 | 114 |
| XP_032808952.1[P.marinus]  | PQSSQASSYVQLLKESLPQETPPANKTN-GGKFLH---KDHIEAFL-SIA-DCREDAF      | 219 |
| XP_014015369.1[S.salar]    | C-----EIPQNL-GIKLSLIVSKRDTYHFFLL-NFSWNRLLENI                    | 197 |
| ABA29525.1[X.laervis]      | S-----GSNKYL-RMKLTMLIEKKDPYHEFLQ-NFTYAQMMEKI                    | 184 |
| NP_989711.2[G.gallus]      | S-----ESHKPL-RMKLAAIVKSKDPYVPLLQ-SFSYSLLSKV                     | 194 |
| NP_033378.1[M.musculus]    | P-----EFYTPL-ERKLLKISQKDVFHSFLQ-HFSYSYSCMEKI                    | 227 |
| P54274.3[H.Sapiens]        | P-----NSHMPF-KSKLLMISQKDTFHSFPQ-HFSYNHMEKI                      | 240 |
| PNJ54419.1[P.abelii]       | P-----NSYMPF-KSKLLMISQKDTFHSFPQ-HFSYNHMEKI                      | 237 |
|                            | .                                                               |     |
| XP_012558972.1[H.vulgaris] | N---NTRFKG--KSFLDKVD---ESDIDIS---KEVENALPQSQVMTLIPKETDIT-YS     | 241 |
| XP_019634930.1[B.belcheri] | IQLFHLIVDGFSLPFLKAAQVRLARIDAGDGTAEPEESLSQ-----SESDSDMYE         | 166 |
| XP_032808952.1[P.marinus]  | NTEFVLLLTDTVPPSLSLKIALPAMGAAESS--PGSERREDSSVP-----EGAAANNSV     | 269 |
| XP_014015369.1[S.salar]    | QTFLDRLFEEHPSDFLLQAATK--VVKAG--Q--ETGDESETQ-----E--ASYT-        | 239 |
| ABA29525.1[X.laervis]      | KSYIALKMKKEPRSVFLKAAAK--VVEAT--A--KEELDIOGQ-----E--SED-         | 225 |
| NP_989711.2[G.gallus]      | KSVYKFLKENRNTNQLQAATK--QVESE--G--GEVRLVQNK-----T--LNV-          | 235 |
| NP_033378.1[M.musculus]    | QSVYGVDLSEKSSSTFLMKAATK--VVENE--K--ARTQASKDR-----P--DATN-       | 269 |
| P54274.3[H.Sapiens]        | KSVYNYVLSEKSSSTFLMKAANK--VVESK--R--TGTITSQDK-----P--SGND-       | 282 |
| PNJ54419.1[P.abelii]       | KSVYNYVLSEKSSSTFLMKAANK--VVESK--R--TGTITSQDK-----P--NGND-       | 279 |
|                            | *                                                               |     |
| XP_012558972.1[H.vulgaris] | SSS--EPMPSYQSSTTYVEKESGTFKDSPCIP--TKHKLNSDSFKETVDLKYSKNHLRK     | 297 |
| XP_019634930.1[B.belcheri] | TPSENEAPPKEQ--EEEFVFNSPAL--LRECFLVMAKEERSGSEWTDVNGDY--RNLRG     | 220 |
| XP_032808952.1[P.marinus]  | APARVISVPQKQ-----LSPAKRLMGPE-----                               | 292 |
| XP_014015369.1[S.salar]    | -----TSRS-----                                                  | 243 |
| ABA29525.1[X.laervis]      | -----CEQQ-----                                                  | 229 |
| NP_989711.2[G.gallus]      | -----KEE-----                                                   | 238 |
| NP_033378.1[M.musculus]    | -----TGMD-----                                                  | 273 |
| P54274.3[H.Sapiens]        | -----VEME-----                                                  | 286 |
| PNJ54419.1[P.abelii]       | -----VEME-----                                                  | 283 |
|                            | .                                                               |     |
| XP_012558972.1[H.vulgaris] | SFKYKGSYKIYNTRSDKKVNTNLNSHMYISDFKKSFTRDNSKKSDDDMIF---DDVRSDI    | 354 |
| XP_019634930.1[B.belcheri] | DLAKSREAKTSGAAASEKDLQNRKEKTSGSGVRKSP-----RKHQQAANKSEPTERRSPR    | 275 |
| XP_032808952.1[P.marinus]  | -----TPRH---VPEDSREEKEKVAP-----LQATPPSPPPPPP                    | 324 |
| XP_014015369.1[S.salar]    | -----SEHS-----K-----VN--QETSV--                                 | 255 |
| ABA29525.1[X.laervis]      | -----TNESLENKDDNSSS-----EY--EERDVL                              | 252 |
| NP_989711.2[G.gallus]      | -----RENNLEAKQR-----P                                           | 249 |
| NP_033378.1[M.musculus]    | -----TEVGLNKEKSVNGQ-----QSTE-TEPLVDT                            | 298 |
| P54274.3[H.Sapiens]        | -----TEANLDRKSVSDK-----QSAV-TESEGT                              | 311 |
| PNJ54419.1[P.abelii]       | -----TEANLDRKSVSDK-----QSAV-TESEGT                              | 308 |
|                            | .                                                               |     |
| XP_012558972.1[H.vulgaris] | SDSQTENLGIKCYVDINKVISPKYIEKKNNDTQNIYCEQNRSNNDNNETEKNK-----TS    | 409 |
| XP_019634930.1[B.belcheri] | KKTSSETTGRHEFATHGAVQSR-----GEKR-----KQOTDEENFEKTENRKKQTQT       | 322 |
| XP_032808952.1[P.marinus]  | LSPL-LLSDSEELLPMRIVQSK-----RSDQSTAEAAACDDAQMSTTDFIPSTY--EEI PP  | 377 |
| XP_014015369.1[S.salar]    | -----                                                           | 255 |
| ABA29525.1[X.laervis]      | LSNI-----NHVENKDVSSSDY--EEATE                                   | 274 |
| NP_989711.2[G.gallus]      | AEL-----RST--TDWLITGDI--SS--                                    | 266 |
| NP_033378.1[M.musculus]    | VSLI-----RSH--KNAL-SQL--KH--                                    | 314 |
| P54274.3[H.Sapiens]        | VSLI-----RSH--KNLFLSKL--QH--                                    | 328 |
| PNJ54419.1[P.abelii]       | VSLI-----RSH--KNLFLPKL--QH--                                    | 325 |
|                            | .                                                               |     |
| XP_012558972.1[H.vulgaris] | NHSSKLQ--IG-QCNLTLSNNEFNCSVVSNNSI-----FGGKK                     | 445 |
| XP_019634930.1[B.belcheri] | SAPSTDNNPGRMOKSGDTGKDIRYWMSTDQPSGVRKKVHKQAEKRTLVESDSSESSE       | 382 |
| XP_032808952.1[P.marinus]  | TAPAKDVAGPGSTP-----PILAIIG--RKRTSDSPRVVEAAATPRLVEDGEVAGPS       | 429 |
| XP_014015369.1[S.salar]    | -----LM                                                         | 257 |
| ABA29525.1[X.laervis]      | QL-----KVCN-----RDIN-----QNELTN-----TTNIQET-TEKSTK              | 303 |
| NP_989711.2[G.gallus]      | -----RVRP--P--S--KKGCR-----                                     | 277 |
| NP_033378.1[M.musculus]    | -----RRAP--SDFS--RNEART-----GT-----                             | 330 |
| P54274.3[H.Sapiens]        | -----GTQQ-----QDLN--KKERRV-----GT-----                          | 344 |
| PNJ54419.1[P.abelii]       | -----GTEQ-----QDLN--KKERRV-----GT-----                          | 341 |
|                            | .                                                               |     |
| XP_012558972.1[H.vulgaris] | KVKVENIHTNNKACHILTNQINYNKLNKTKNSDQQTADSDDIYIKTSADLACVKNI-       | 504 |

|                            |                                                              |     |
|----------------------------|--------------------------------------------------------------|-----|
| XP_019634930.1[B.belcheri] | ETRKENVITQGS-----KKR-----P-----R-----DRPEY                   | 403 |
| XP_032808952.1[P.marinus]  | KPRAATISPAKATCGKWDKGGHGP-----TRNH-----VERNGRFPDGFSSAEIRRLS   | 478 |
| XP_014015369.1[S.salar]    | RPKKKLLS--TRNIHPWKPESGKK-----PALT-----FMRKRIV--STRL--TYRRALP | 300 |
| ABA29525.1[X.laavis]       | RHQRLFS--IAQRTPNWPKPCT-----SKRL-----LSS-----IN--IGKNSKE      | 341 |
| NP_989711.2[G.gallus]      | -----T-----SSVQRLK                                           | 285 |
| NP_033378.1[M.musculus]    | -----LQCE-----TIME-----RNR-----RT--SGRNRLC                   | 350 |
| P54274.3[H.Sapiens]        | -----PQST-----KSKK-----ES-----RR--ATESRIP                    | 363 |
| PNJ54419.1[P.abelii]       | -----LQST-----KSKK-----ES-----RR--ATESRIP                    | 360 |
| XP_012558972.1[H.vulgaris] | -DSLREDVTSKDTSVTPASLKKLLGDEQQNDKVVFEF--VCQSSKEKTVSSSVANKKS   | 561 |
| XP_019634930.1[B.belcheri] | GNGVKETWSSDEETFPAPVKKKYYIYDS-DSDSSENFPSALPCSA-ASLVVPRRLVQKRE | 461 |
| XP_032808952.1[P.marinus]  | PLMIKDEWSDEEDLFGP-----SKVAGR--                               | 501 |
| XP_014015369.1[S.salar]    | -----ETTLNT-----TSLSNT--                                     | 312 |
| ABA29525.1[X.laavis]       | -----NQ-----ENVKDS--                                         | 349 |
| NP_989711.2[G.gallus]      | -----D-----LKNVEE--                                          | 292 |
| NP_033378.1[M.musculus]    | -----VSENQP--                                                | 356 |
| P54274.3[H.Sapiens]        | -----VSKSQP--                                                | 369 |
| PNJ54419.1[P.abelii]       | -----VSKSQL--                                                | 366 |
| XP_012558972.1[H.vulgaris] | IVNSDESGTCKWSDDEFVKNYPTVRVPFSKDEEKYIKEGIKKFGIGNWCKIKRSYPFH   | 621 |
| XP_019634930.1[B.belcheri] | PL-----DITSKGQVRSRFRWAEYEVENLIKGVQEQYGVGHWSEILDNYRFK         | 507 |
| XP_032808952.1[P.marinus]  | -----QSKFGSSARKKKMWTEETETQCLKEGVARFVGNGWSKIKRHYSL-           | 544 |
| XP_014015369.1[S.salar]    | -----TLATNATRKTHGRWPWDLDMALKAGVKRHGEGKWSRILQEHDFQ            | 356 |
| ABA29525.1[X.laavis]       | -----RTEKPLNSKKRQHWTWEEDELLKKGVKRFVGVGNWSKILLHYEFR           | 393 |
| NP_989711.2[G.gallus]      | -----RGDDLPCSRRRQFWTYEEDKKLKSQVREFVCVGNWTKILLHGDFN           | 336 |
| NP_033378.1[M.musculus]    | -----DTDKSGRRKRQTLWNEEDRILKCGVKKYEGGNWAKILLSHYKFN            | 400 |
| P54274.3[H.Sapiens]        | -----VTPEKHRARKRQAWLWEEDKNLRSGVRKYEGGNWSKILLHYKFN            | 413 |
| PNJ54419.1[P.abelii]       | -----VTPEKHRARKRQAWLWEEDKNLRSGVRKYEGGNWSKILLHYKFN            | 410 |
|                            | : : : * : * : *                                              |     |
| XP_012558972.1[H.vulgaris] | PNRNTNVSIIKDKYRTMKRQGIL----- 642                             |     |
| XP_019634930.1[B.belcheri] | -NRTNVNLKDKWRQLVKSGTVREFF-- 531                              |     |
| XP_032808952.1[P.marinus]  | -SRTAVQLKDRWRNLISK----- 560                                  |     |
| XP_014015369.1[S.salar]    | -GRTGVQLKDRWRVLKKAHKVNSS-- 379                               |     |
| ABA29525.1[X.laavis]       | -NRTGVMLKDRWRTMKRLKIVSDCDL 419                               |     |
| NP_989711.2[G.gallus]      | -NRTSVMLKDRWRTLCKIK----- 354                                 |     |
| NP_033378.1[M.musculus]    | -NRTSVMLKDRWRTMKRLKLIS----- 421                              |     |
| P54274.3[H.Sapiens]        | -NRTSVMLKDRWRTMKRLKLISDSSED 439                              |     |
| PNJ54419.1[P.abelii]       | -NRTSVMLKDRWRTMKRLKLICSDSED 436                              |     |
|                            | .** * :***: : :                                              |     |
