# Supplementary material for: An Evolutionary Perspective on the Origin, Conservation and Binding Partner Acquisition of Tankyrases
Source: MDPI journal article supplement (doi:10.3390/biom12111688), 2022-11-15
Supplement: s1 [file s1]

# Seryl-tRNA synthase

## Sequences :

>NP\_006504.2 serine--tRNA ligase, cytoplasmic isoform a [Homo sapiens]  
MVLDDLFRVDKGGDPALIRETQEKRFKDPGLVDQLVKADSEWRRRCFRADNLNKLNLCSKTIGERMKK  
KEPVGDDSEVPENLVSFDDLADALANLKVSQLKKVRLLLIDEAILKCDAERIKLEAERFENLREIGNLLH  
PSVPISNDEEDVNKVERIWDGCTVRRKYSHVDLVVMVDGFEGEKGAVVAGSRGYFLKGVLVFLQALIQY  
ALRTLGSRGYIPIYTPFFMRKEVMQEVQALSQFDEELYKVIKGSGSEKSDDNSYDEKYLIIATSEQPIAALH  
RDEWLRPEDLPIKYAGLSTCFRQEVGSHGRDTRGIFRVHQFEKIEQFVYSSPHDNKSWEMFEEMITTAEE  
FYQSLGIPYHIVNIVSGSLNHAASKKLLDEAWFPGSGAFRELVSCSNCTDYQARRLRIRYGTQTKMMMDKV  
EFVHMLNATMCATTRTICAILENYQTEKGITVPEKLKEFMPGLQELIPFVKPAPIEQEPSKKQKKQHGE  
SKKKAARVDLTLENRLQNMEVTA

>NP\_001125910.1 serine--tRNA ligase, cytoplasmic [Pongo abelii]  
MVLDDLFRVDKGGDPALIRETQEKRFKDPGLVDQLVKADSEWRRRCFRADNLNKLNLCSKTIGERMKK  
KEPVGDDSEVPENLVSFDDLADALANLKVSQLKKVRLLLIDEAILKCDAERIKLEAERFENLREIGNLLH  
PSVPISNDEEDVNKVERIWDGCTVRRKYSHVDLVVMVDGFEGEKGAVVAGSRGYFLKGVLVFLQALIQY  
ALRTLGSRGYIPIYTPFFMRKEVMQEVQALSQFDEELYKVIKGSGSEKSDDNSYDEKYLIIATSEQPIAALH  
RDEWLRPEDLPIKYAGLSTCFRQEVGSHGRDTRGIFRVHQFEKIEQFVYSSPHDNKSWEMFEEMITTAEE  
FYQSLGIPYHIVNIVSGSLNHAASKKLLDEAWFPGSGAFRELVSCSNCTDYQARRLRIRYGTQTKMMMDKV  
EFVHMLNATMCATTRTICAILENYQTEKGITVPEKLKEFMPGLQELIPFVKPAPIEQEPSKKQKKQHGE  
SKKKAARVDLTLENRLQNMEVTA

>NP\_001191908.1 serine--tRNA ligase, cytoplasmic isoform 2 [Mus musculus]  
MVLDDLFRVDKGGDPALIRETQEKRFKDPGLVDQLVKADSEWRRRCFRADNLNKLNLCSKTIGERMKK  
KEAVGDDSEVPENLVNFDLLADALAALKVSQLKKVRLLLIDEAILKQCDGERVKLEAERFENLREIGNLLH  
PSVPISNDEEDADNKNVERIWDGCTVRRKYSHVDLVVMVDGFEGEKGAVVAGSRGYFLKGPLVFLQALIQY  
ALRTLGSRGYIPIYTPFFMRKEVMQEVQALSQFDEELYKVIKGSGSEKSDDNSYDEKYLIIATSEQPIAALH  
RDEWLRPEDLPIKYAGLSTCFRQEVGSHGRDTRGIFRVHQFEKIEQFVYSSPHDNKSWEMFEDIATAEE  
FYQSLGIPYHIVNIVSGSLNHAASKKLLDEAWFPGSGAFRELVSCSNCTDYQARRLRIRYGTQTKMMMDKV  
EFVHMLNATMCATTRTICAILENYQAEKGIAVPEKLKEFMPGLQELIPFVKPAPIEQEPSKKQKKQHGE  
SKKKAKEVPLENLQSQMEVTA

>NP\_001026563.1 serine--tRNA ligase, cytoplasmic [Gallus gallus]  
MVLDDLFRADKGGDPAAVREMRQKRKFDPALVDALVRADGAWRRRCFRADNLNKLNLCSKTIGDKMKK  
KEPVGDDSEVPESAQNLDLTDADVLGGLQVSQLKKVRLLLIDEAILCEDAERVRLAERFESLREIGNLLH  
PSVPISNDEEDADNKNVERIWDGDCSRKKYSHVDLVVMVDGFEGEKGAVVAGSRGYFLKGPLVFLQALIQY  
ALQSLRAKGYTPVYTPFFMRKEVMQEVQALSQFDEELYKVIKGSGSEKSDDNSYDEKYLIIATSEQPIAALH  
RDEWLRPEDLPIKYAGLSTCFRQEVGSHGRDTRGIFRVHQFEKIEQFVYASPHDNKSWEMFEDIATAEE  
FYQSLGIPYHIVNIVSGSLNHAASKKLLDEAWFPGSGAFRELVSCSNCTDYQARRLRIRFGQTKMMMDKV  
EFVHMLNATMCATTRTICAILENYQTEEGIVVPELRDPMPPDLRQIIRFVKPAPIEQELSKKQKKQHQEG  
GRKKAAGGERVLEEQMNMVSSA

>XP\_018104878.1 serine--tRNA ligase, cytoplasmic [Xenopus laevis]  
MVLDDLFRFREDKGGNPVLVRETQKRKFDPLVDLTLLNSDTAWRRSRFPADNLNKLNLCSKTIGERMKK  
KEPLGDSDDLVPENIQLDQLTAEVLALSVTQIKRLVRLIDEAIIAATDAERIKLEAERFESLREIGNLLHP  
TVPIISNDEEDADNKNVERTWGDCEIQKKYSHVDLVVMVDGFEGEKGAVVAGSRGYFLKGPLVFLQALIQFA  
LHTLSEKGYTPVYTPFFMRKEVMQEVQALSQFDEELYKVIKGSGSEKSDDNSYDEKYLIIATSEQPIAALH  
DEWLKPEDLPYRIVGISTCFRQEVGSHGRDTRGIFRVHQFEKIEQFVYASPHDNKSWEMFEDIATAEP  
YQMLGIPYRIVNIVSGSLNHAASKKLLDEAWFPGSGAFRELVSCSNCTDYQARRLRIRYGTQTKMMMDKV  
FVHMLNATMCATTRAICAILENYQTEEGIIIVPEKLRFMPPLGLDKIIFVKPAPIDQELTKKQKQQQEK  
GKKTENGLDQTESMKVHSA

>XP\_013991973.1 serine--tRNA ligase, cytoplasmic-like [Salmo salar]  
MVLDDLFRADKGGDPEVIRETQKRKFDVSLVDKLVDHADTEWRKCRFTADNLNKAKNLCSKTIGERMKK  
KEPIGDEDDLDDAQNLALADTDLAPLTVTQIKKVRLLIDEAVAQKSDSERVKLEERFQYLRIGNLLH  
PSVPISNDEEDADNKNVERTWGDCTVQKKYSHVDLVVMVDGYDGEKGAIVAGSRGYFLKGPLVFLQALINY  
ALRMLHKNYQMLYTPFFMRKEVMQEVQALSQFDEELYKVIKGSGSEKSDTAIDEKYLIIATSEQPIAFL  
RDEWLKPEELPIRYAGLSTCFRQEVGSHGRDTRGIFRVHQFEKIEQFVFASPHDNKSWEMDEMIGTAAE  
FYQTGLPIYRIVNIVSGALNHAASKKLLDEAWFPGSAAFRELVSCSNCLDYQARRLRIRYGTQTKMMMDKA  
DYVHMLNATMCATTRVMCAILETYQTEEGIIPEVLRNFMPPGMTEMLKFKVPAPIDVEMSKKQKKQQDG  
GKKKQSGDQLQNQVDNMSVHDS

>XP\_032819422.1 serine--tRNA ligase, cytoplasmic [Petrotyzoon marinus]  
MVLDDLFRADKGGDPTVRVRENQARRFKDVCLVDTLVQADTQWRACRYRADNLNKLNLCSKTIGDRMKK  
KEDPQGBETLPEGTGFLDELADTDLAALSVAQIKVLRLLQIDNAILALCDTERLRLAERVLDLSREVGNILH  
PSVPISNDEEDADNKNVERTWGDCTVQKKYSHVDLVVMVDGFEGEKAIVSGSRGYFLKGPLVFLQALIQAL  
ALQRLYSQGYTFLYTPFFMRKEVMQEVQALSQFDEELYKVIKGSGSEHADDSSYDEKYLIIATSEQPIAAFH  
RDEWLKPEQLPMRYAGLSSCFRQEVGSHGRDTRGIFRVHQFEKIEQFYVYSPHDNKSWEMFDEMVKTAEG  
FYQELGIPYRIVNIVSGALNHAASKKLLDEAWFPGSAAFRELVSCSNCTDYQARRLRVRYGTQTKMMMDKA  
EFVHMLNATMCATTRTICAILETYQTETGVVVPEALRFMPMPGLKEELKFKVKSAPIDQEQIKKQKRGKGD  
GLAANLGNMAVNS

>XP\_019634257.1 PREDICTED: serine--tRNA ligase, cytoplasmic-like [Branchiostoma belcheri]  
MVLDDLFRVDRGGDPNKIRENQSKRYKDVTLVDNVVQADEQWRKLRYQADTLNRLNLCSKTIGERMKK  
KEPVGEESESPTEDELEKLTPEALQAMTVNQIKQIRTII DKSILENTAGRAEVEKLRQENLKEIGNILH  
ADVPISNDEEDDNRTERTNGDCTVRRKYSHVDLITMIDGYDGERGAVTAGSRGYMKGIATVFLQALIQY  
ALRLIYEKGYTALYTPFFMKNKGMSEVAQALSQFDEELYKVIKGSGEKDDQTEDVKYLIIATSEQPIAAFH  
RDEWMKPEDLPIKYAGISTCFRQEVGSHGRDTRGIFRVHQFEKVEQVFLSKPDDSWGLFHEMIGNAEFYY  
KTLGIPYRIVNIVSGALNNAAMKYDLLEAWFPGSGAFRELVSCSNCLDYQARRLLVRYGTQTKMNEKPEF  
VHMLNATMCATTRVICAILENHQTEEGIVIPEVLRQYMPGGTEFITFVKPAPIEEQATKKKKAGKKKEKV  
KPTQDGEAEKVTEQVQNMVAVNEG

>NP\_001259982.1 Seryl-tRNA synthetase, isoform B [Drosophila melanogaster]  
MVLDDLFRSDKGGNPDLVRENQKKRFKDVAVETVIAKDTWRQCRHRADNLNKLNVCSKVIGERMKK  
KEPVGAMSEDLPADVTKDLTIEAIVETQLPLTVNQIKQLRVLLDDAMTENQKSLAEAQTRNTLSREVGNH  
LHESVPVSNDEEDENRVERTFGDCEKRGKYSHVDLIVMIDGMNAEKAIVSGRGYFLTGAAVFLQALIQ  
HALHLLYARDYVPLYTPFFMRKEVMQEVQALSQFDEELYKVIKGSGSEKAEVGI DEKYLIIATSEQPIAAY  
HREWLPESSLPIKYAGLSTCFRQEVGSHGRDTRGIFRVHQFEKVEQFVLTS PHDNKSWEMMDMIGNAE  
QFCQSLGIPYRIVNIVSGALNHAASKKLLDEAWFGSGAYRELVSCSNCLDYQARRLLVRFQGTQKKNAA  
VDYVHMLNATMCAATRVICAILETHQTEGTIKVPEPLKYMPAKFQDEIPFVKPAPIDLLEAAAEKQKQK  
KEKTKKDPAAQ

>XP\_001639063.2 serine--tRNA ligase, cytoplasmic [Nematostella vectensis]  
MKFFSPSLQLRTVRISFVFRILSSSSSKMVLDDLRYADKGGNPDKIRENQSKRYSDVTLVDKVV EAD  
TQWRKFRFSKDNWNKLNLCSKQIGDKMKKKEPVGDDTLPEKVELDGLLELTAEMLQQLTVTQIKIIVRTL  
VDNMAKKNEEVARLEKLRNEKLFVGNILHDSVRI SNDEENPVDRIVGDCSVRRKYSHVDLVHMDVGV  
DIDRGSVVGASRGYFLKGPLVFLHEHALIQHATRMLYGKGFIPLSTPFFMRKEVMQEVQALSQFDEELYKV  
VGGADEAGYEKYLIATSEQPIAAFHGRGEWMDKNDLPKKYAGFSTCFRQEAGAHGRDTRGIFRVHQFEK  
IEQFVICS PHDNI SWEIFDEMI GNAE EFHKS LGIPYRIVS IVSGALNNAAAKLLDEAWFPASGAFREL  
VSCSNCTDYQARRLVRFQGTQKMGVSTEXVHMLNATMCAVSRVICAILENNQTEEGVVMQALPHLYLPQD  
LHFLKFKVPAPIDDKPEQKKQKKGKNKANNE SVGCL ESKLEDVNL

>XP\_047126420.1 serine--tRNA ligase, cytoplasmic [Hydra vulgaris]  
MLQCHQLKRLHQPNNSLKKLRFSTSSSLKMVLDELFRSDKGCCPEKIRENQSKRFKDVTLVDKVV EADEK

WRKLRFAQDNWNKLNLCSTIGLKMKNKEPEGESDLLPDSLSNIEELQALNPDTLEKFTVLQIKRIRGL  
IDDIYNKCESERVGCEKVRHECLFEVGNWLHDSVVVSNDEEENEIVRVVGDCTTKKKFSHVDLLAMIDGV  
DYERGANVAGNRGYFLKGPVLLQQALINLALQTLVSGSYTPIYTPFFMRKEVMQEVQLSQFDEELYKV  
VGKGSERDDDTAVEEKYL IATSEQPIAAFHREGWMSTSDLPKKYAGISSCFRQEVGCHGRDTRGIFRVHQ  
FEKVEQFVICSPHDNESWKHLDEMVNNAEKFYQALNIPYRIVGIVSGALNNAAKKLDLEAWFFGSGAFR  
ELCSCSNCTDYQARRLLVRYGQTKMNDKTEFCHMLNATMCASTRVICCILENNQTEEGITVPELLRPFM  
GNVEFIKYVKTAPIEGNKDVKGKSNKKKPEKIEENLKNLDVKE

>XP\_003383114.1 PREDICTED: serine--tRNA ligase, cytoplasmic-like isoform X2 [Amphimedon queenslandica]  
MPLDLLLFRADQGGNPDIMRDMQKKRFKDVIVHVKVVMEDTQWRKLRFESDNWNKLNHCSTIGEXMKK  
KEPIGESADVPESLVTKLDSITPDEIKSLTVTQIKRLQQLIEASDKNSTKRKELEETRSFHLAQIGNSL  
HPSVPI SDNEDNNRVERTFGDASIRKKYSHMDLVVMVDGVDMQRGTTVAGNRCYYLKGPLVFLEQALIQF  
ALSTLSEKSFVPLYTPFFMKKEVMQEV AHLSDYEEMLYKVIKSSSEIVDDSNVEEKYL IATSEQPIAAFH  
RGDWLDPQTLPLKYAGLSSCFRQEVDSHGRDTRGIFRVHQFQKVEQFCLTSPHDDVSWKMFDEMISNAEF  
FYQQLGIPYRVVNIIVSGELNLAAMKYDLEGLFPGSGAYRELVCSNCLDYQVRRLQVRFLTKKMNAQA  
DYVHMLNATMCATTRTICAILENNQTEEGVVVPEILRQYMPFAYKEFIKFVQAAPIHEPITKKQENQMAQ  
MEKDNEAQS

## Alignment

|                                 |                                                                |     |
|---------------------------------|----------------------------------------------------------------|-----|
| XP_047126420.1[H.vulgaris]      | ---MLQCHQLKRLHQPNNSLKKLRFSTSSLMKVLDELFRSDKGCCPEKIRENQSKRFF     | 56  |
| XP_003383114.1[A.queenslandica] | -----MPLDLLLFRADQGGNPDLMRDMQKKRFF                              | 28  |
| XP_001639063.2[N.vectensis]     | MKFFSPSLHQLRTVRI--SFVFRRLSSSSSKMVLDDLRYADKGGNPDKIRENQSKRYS     | 58  |
| XP_019634257.1[B.belcheri]      | -----MVLDDLFRVDRGGDPNKIRENQSKRYK                               | 28  |
| NP_001259982.1[D.melanogaster]  | -----MVLDDLFRSDKGGNPDLVRENQKKRFF                               | 28  |
| XP_013991973.1[S.salar]         | -----MVLDDQFRADKGGDPVIRETQKRKFF                                | 28  |
| XP_032819422.1[P.marinus]       | -----MVLDDLFRADKGGDPTRVRENQARRFF                               | 28  |
| XP_018104878.1[X.laevis]        | -----MVLDDLFRFDKGGNPELVIRETQKRKFF                              | 28  |
| NP_001026563.1[G.gallus]        | -----MVLDDLFRADKGGDPAAVREMQRKFF                                | 28  |
| NP_001191908.1[M.musculus]      | -----MVLDDLFRVDKGGDPALIRETQEKRRFF                              | 28  |
| NP_006504.2[H.sapiens]          | -----MVLDDLFRVDKGGDPALIRETQEKRRFF                              | 28  |
| NP_001125910.1[P.abelii]        | -----MVLDDLFRVDKGGDPALIRETQEKRRFF                              | 28  |
|                                 | * ** * : * * * * : * : * : *                                   |     |
| XP_047126420.1[H.vulgaris]      | DVTLVDKVVAEDEKWRKLRFAQDNWNKLNKLSKTIGLKMKNKEPEGESD-LLPDSLNI     | 115 |
| XP_003383114.1[A.queenslandica] | DVIHVDKVVEMDTQWRKLRFSEDNWNKLNKNSKTIGEKMKKKEPIGESA-DVPES--LV    | 85  |
| XP_001639063.2[N.vectensis]     | DVTLVDKVV EADTQWRKFRFSKDNWNKLNKLSKTIQIDKMKKKEPVGDDE-TLPKE--VL  | 115 |
| XP_019634257.1[B.belcheri]      | DVTLVDNVVQADEQWRKLRVQADTLNRLKNLCSKTIGEKMKKKEPVGEESSESPTE----   | 84  |
| NP_001259982.1[D.melanogaster]  | DVALVETVIAKDETEWRQCRHRADNLNKVNKNSCVIGEKMKKKEPVGAMESDLPAD-VT    | 86  |
| XP_013991973.1[S.salar]         | DVSLVDKLVHADTEWRKCRFTADNLNAKLNCSKTIQGEKMKKKEPIGEDD-SLP-D--DA   | 84  |
| XP_032819422.1[P.marinus]       | DVCLVDTLVQADTQWRACRYRADNLNKLNLCSKTIQIDKMKKKEPDGQDE-TLP-E--GT   | 84  |
| XP_018104878.1[X.laevis]        | DPGLVDTLLNSDTAWRKSRFAQDNLNKQNLNCSKTIQGEKMKKKEPLGDS-D-VLP-E--NI | 84  |
| NP_001026563.1[G.gallus]        | DFALVDALVRADGAWRRCRFRADNLNKLNLCSKTIQIDKMKKKEPVGSDE-SVP-E--SA   | 84  |
| NP_001191908.1[M.musculus]      | DFGLVDQLVKADSEWRRCRFRADNLNKLNLCSKTIQGEKMKKKEPVGDDE-SVP-E--NV   | 84  |
| NP_006504.2[H.sapiens]          | DFGLVDQLVKADSEWRRCRFRADNLNKLNLCSKTIQGEKMKKKEPVGDDE-SVP-E--NV   | 84  |
| NP_001125910.1[P.abelii]        | DFGLVDQLVKADSEWRRCRFRADNLNKLNLCSKTIQGEKMKKKEPVGDDE-SVP-E--NV   | 84  |
|                                 | * : * : : * * * * . * . * : * * * * * * * * * *                |     |
| XP_047126420.1[H.vulgaris]      | EELQALNPDTLEKFTVLQIKRIRGLIDDIYNKCESERVGCEKVRHECLFEVGNMLHDSVV   | 175 |
| XP_003383114.1[A.queenslandica] | TKLDSITPDEIKSLTVTIQIKRLQQLIEEASDNCKTKRKELEETSRFLHAQIGNSLHPSVP  | 145 |
| XP_001639063.2[N.vectensis]     | DGLEELTAEMLQQLTVTIQIKVIRTVDDGMAKNEEVARLEKLRNEKLFEVGNILHDSVR    | 175 |
| XP_019634257.1[B.belcheri]      | DELEKLTPEALQAMTVNQIKIRTIIDKSLIENAGRAEVEKLRNKELEIGNILHADVP      | 144 |
| NP_001259982.1[D.melanogaster]  | KDLTEIVAETLQPLTVNQIKQLRVLIDDAMTENQKSLEAEQTRNTSLREVGNLHESVP     | 146 |
| XP_013991973.1[S.salar]         | QNLEALTADTLAPLTVTIQIKKVRLLVDEAVQSDSERVKLEERFYQLREIGNLHPSVP     | 144 |
| XP_032819422.1[P.marinus]       | PGLDELTAADTLAALSVAQIKRLRLQIDNAIALCDETERLKEAVRLDLSREVGNLHPSVP   | 144 |
| XP_018104878.1[X.laevis]        | -QLDQLTAEVLALSVTQIKRLRVLIDEAIAATDAERIKLEAERFESLREIGNLHPTVP     | 143 |
| NP_001026563.1[G.gallus]        | QNDELTAADVLGGVQSQIKKVRLLIDEAILECDAERVKLEAERFESLREIGNLHPSVP     | 144 |
| NP_001191908.1[M.musculus]      | LNFDLLTADALAALKVYSQIKKVRLLIDEAIIQKCDGERVKLEAERFENLREIGNLHPSVP  | 144 |
| NP_006504.2[H.sapiens]          | LSFDDLTADALANLKVSQIKKVRLLIDEAIIKCDKAERIKLEAERFENLREIGNLHPSVP   | 144 |
| NP_001125910.1[P.abelii]        | LSFDDLTADALANLKVSQIKKVRLLIDEAIIKCDKAERIKLEAERFENLREIGNLHPSVP   | 144 |
|                                 | : : : : * * * * : : . * * * * : * * * * *                      |     |
| XP_047126420.1[H.vulgaris]      | VSNDDE-ENIEIVRVGDCTTKKKFSHVDLLAMIDGVDYERGANVAGNRGYFLKPGVLLIQ   | 234 |
| XP_003383114.1[A.queenslandica] | ISDNED-NNRVERTFGDASIRKKYSHMDLVVMVGDVDMQRTTVAGNRCYFLKGPLVFLE    | 204 |
| XP_001639063.2[N.vectensis]     | ISNDED-ENPDRIVGDCSVRKKYSHVDLVHMDVGDVIDRGSVVAGSRGYFLKGPLVFLE    | 234 |
| XP_019634257.1[B.belcheri]      | ISNDEDEDNRTERTGDCTVRKKYSHVDLITIMIDGYGERGAVTAGSRGYMKGIAVFLE     | 204 |
| NP_001259982.1[D.melanogaster]  | VSNDDE-ENRVERTFGDCEKRGKYSHVDLIVMIDGMNAEKAIVSGRGYFLTGAAVFLE     | 205 |
| XP_013991973.1[S.salar]         | ISNDEADNKVERTGDCTVQKKYSHVDLVVMIDGYGEKGAIVAGSRGYFLKGPLVFLE      | 204 |
| XP_032819422.1[P.marinus]       | VSNDDEADNKVERTGDCTVRKKYSHVDLVVMVDGYGEKGAIVSGRAYFLKGPLVFLE      | 204 |
| XP_018104878.1[X.laevis]        | ISNDEDDNKVERTGDCIEQKKYSHVDLVVMVDGFEKGAIVAGSRGYFLKGPLVFLE       | 203 |
| NP_001026563.1[G.gallus]        | ISNDEADNKVIRIWDGDCSRKKYSHVDLVVMVDGYGEKGAIVAGSRGYFLKGPLVFLE     | 204 |
| NP_001191908.1[M.musculus]      | ISNDEADNKVIRIWDGCTVRKKYSHVDLVVMVDGFEKGAIVAGSRGYFLKGPLVFLE      | 204 |
| NP_006504.2[H.sapiens]          | ISNDEDDNKVIRIWDGCTVRKKYSHVDLVVMVDGFEKGAIVAGSRGYFLKGPLVFLE      | 204 |
| NP_001125910.1[P.abelii]        | ISNDEDDNKVIRIWDGCTVRKKYSHVDLVVMVDGFEKGAIVAGSRGYFLKGPLVFLE      | 204 |
|                                 | : : * : * * : : * * * * : * * : : : . * * * * : * * * * *      |     |
| XP_047126420.1[H.vulgaris]      | QALINLALQTLVSGSYTPIYTPFFMRKEVMQVEAQLSQFDEELYKVVKGKSERDDDTAVE   | 294 |
| XP_003383114.1[A.queenslandica] | QALIQFALSTLSEKSFVPLTPFFMRKEVMQVEAHLSDIEEMLYKVIKGSSEIVDSDSNE    | 264 |
| XP_001639063.2[N.vectensis]     | HALIQHATRLMYKGFPLSTPFFMRKEVMQVEAQLSQFDEELYKVVKGKAD---EAGYE     | 291 |
| XP_019634257.1[B.belcheri]      | QALIQYALRLILEKGYTALYTPFFMRKVMQVEAQLSQFDEELYKVIKGSSEKDDQDTE     | 264 |
| NP_001259982.1[D.melanogaster]  | QALIQHALHLLIYARDYVPLYTPFFMRKEVMQVEAQLSQFDEELYKVIKGSSEKAEVGD    | 265 |
| XP_013991973.1[S.salar]         | QALINYALRMLHSKNYQMLYTPFFMRKEVMQVEAQLSQFDEELYKVIKGSSEKSEDTAID   | 264 |
| XP_032819422.1[P.marinus]       | QALIQALQLRLYSQGYTPLYTPFFMRKEVMQVEAQLSQFDEELYKVIKGSSEHADDSVD    | 264 |
| XP_018104878.1[X.laevis]        | QALIQFALHTLSEKGYTPIYTPFFMRKEVMQVEAQLSQFDEELYKVIKGSSEKSDDSVD    | 263 |
| NP_001026563.1[G.gallus]        | QALIQYALQSLRAKGYTPVYTPFFMRKEVMQVEAQLSQFDEELYKVIKGSSEKAESSVD    | 264 |
| NP_001191908.1[M.musculus]      | QALIQYALRTLGSRGYTPYTPFFMRKEVMQVEAQLSQFDEELYKVIKGSSEKSDDSYD     | 264 |
| NP_006504.2[H.sapiens]          | QALIQYALRTLGSRGYPIYTPFFMRKEVMQVEAQLSQFDEELYKVIKGSSEKSDDSYD     | 264 |
| NP_001125910.1[P.abelii]        | QALIQYALRTLGSRGYPIYTPFFMRKEVMQVEAQLSQFDEELYKVIKGSSEKSDDSYD     | 264 |
|                                 | : * * : : * * * * * * * * : * * * * * : : : *                  |     |
| XP_047126420.1[H.vulgaris]      | EKYLIIATSEQPIAAFHRGEMWSTDLPKKYAGISSCFRQEVGCHGRDTRGIFRVHQFEKV   | 354 |
| XP_003383114.1[A.queenslandica] | EKYLIIATSEQPIAAFHRGDWLDPQTLPLKYAGLSSCFRQEVDSHGRDTRGIFRVHQFQKV  | 324 |
| XP_001639063.2[N.vectensis]     | EKYLIIATSEQPIAAFHRGEMWMDNDLPKKYAGFSTCFRQEAGAGHRDTRGIFRVHQFEKI  | 351 |
| XP_019634257.1[B.belcheri]      | VKYLIIATSEQPIAAFHRDEWMPEDLPKYAGISTCFRQEVGSHGRDTRGIFRVHQFEKV    | 324 |
| NP_001259982.1[D.melanogaster]  | EKYLIIATSEQPIAAFHRDEWLPESSLPFIKYGALSTCFRQEVGSHGRDTRGIFRVHQFEKV | 325 |
| XP_013991973.1[S.salar]         | EKYLIIATSEQPIAALHRDEWLPEELPIRYAGLSTCFRQEVGSHGRDTRGIFRVHQFEKI   | 324 |
| XP_032819422.1[P.marinus]       | EKYLIIATSEQPIAALHRDEWLPEELPIRYAGLSTCFRQEVGSHGRDTRGIFRVHQFEKI   | 324 |
| XP_018104878.1[X.laevis]        | EKYLIIATSEQPIAALHRDEWLKPEDLPVRYAGISTCFRQEVGSHGRDTRGIFRVHQFEKI  | 323 |
| NP_001026563.1[G.gallus]        | EKYLIIATSEQPIAALHRDEWLKPEDLPKYAGLSTCFRQEVGSHGRDTRGIFRVHQFEKI   | 324 |
| NP_001191908.1[M.musculus]      | EKYLIIATSEQPIAALHRDEWLRPEDLPKYAGLSTCFRQEVGSHGRDTRGIFRVHQFEKI   | 324 |
| NP_006504.2[H.sapiens]          | EKYLIIATSEQPIAALHRDEWLRPEDLPKYAGLSTCFRQEVGSHGRDTRGIFRVHQFEKI   | 324 |
| NP_001125910.1[P.abelii]        | EKYLIIATSEQPIAALHRDEWLRPEDLPKYAGLSTCFRQEVGSHGRDTRGIFRVHQFEKI   | 324 |
|                                 | ***** * : * . * * * * : * * * * : * * * * * : * * * * * : *    |     |
| XP_047126420.1[H.vulgaris]      | EQFVICSPHDNCSWKHLDEMVNNAEKFYQALNIPIYRIVGIVSGALNNAAKKLDLEAWFP   | 414 |
| XP_003383114.1[A.queenslandica] | EQFCLTSPHDDVSKWMPDEMI SNAEFFYQQLGIPYRVNIVSGELNLAAMKYDLEGLFP    | 384 |
| XP_001639063.2[N.vectensis]     | EQFVICSPHDNISWEIFDEMI SNAEFHKS LGIPYRIVIVSGALNNAAKKLDLEAWFP    | 411 |
| XP_019634257.1[B.belcheri]      | EQFVLSPKDD--SWGLFHEMIGNAEEFYKTLGIPYRIVNIVSGALNNAAMKYDLEAWFP    | 382 |
| NP_001259982.1[D.melanogaster]  | EQFVLTSPHDNKSWEMMDEMI SNAEFQCS LGIPYRVNIVSGALNHAASKKLDLEAWFG   | 385 |
| XP_013991973.1[S.salar]         | EQFVFASPHDNKSWEMMDEMI SNAEEFYQTLGIPYRIVNIVSGALNHAASKKLDLEAWFP  | 384 |
| XP_032819422.1[P.marinus]       | EQFVYTSPHDNKSWEMFDEMVKTAEGFYQELGIPYRIVNIVSGALNHAASKKLDLEAWFP   | 384 |
| XP_018104878.1[X.laevis]        | EQFTYASPHDNKSWEMFEEMITAEFSFYQMLGIPYRIVNIVSGALNHAASKKLDLEAWFP   | 383 |
| NP_001026563.1[G.gallus]        | EQFVYASPHDNKSWEMFDEMIATAEEFYQSLGIPYHIVNIVSGALNHAASKKLDLEAWFP   | 384 |
| NP_001191908.1[M.musculus]      | EQFVYASPHDNKSWEMFDEMITAEFYQSLGIPYHIVNIVSGALNHAASKKLDLEAWFP     | 384 |
| NP_006504.2[H.sapiens]          | EQFVYASPHDNKSWEMFDEMITAEFYQSLGIPYHIVNIVSGALNHAASKKLDLEAWFP     | 384 |
| NP_001125910.1[P.abelii]        | EQFVYASPHDNKSWEMFDEMITAEFYQSLGIPYHIVNIVSGALNHAASKKLDLEAWFP     | 384 |
|                                 | *** . * * * * : * * : * * * * : * * * * : * * * * : * * * * *  |     |
| XP_047126420.1[H.vulgaris]      | GSAGFRELVSCSNCTDYQARRLLVRYGQTKKMDKTEFCHMLNATMCASTRVICILENN     | 474 |
| XP_003383114.1[A.queenslandica] | GSAGYRELVSCSNCLDYQARRLQVRFLTKKMDKQADYVHMLNATMCATTRTICAILENN    | 444 |
| XP_001639063.2[N.vectensis]     | ASGAFRELVSCSNCTDYQARRLQVRFGQTKKMGVSTEVYHMLNATMCASVRVICAILENN   | 471 |
| XP_019634257.1[B.belcheri]      | GSAGFRELVSCSNCLDYQARRLLVRYGQTKKMKNEPEFVHMLNATMCATTRVICAILENN   | 442 |
| NP_001259982.1[D.melanogaster]  | GSAGYRELVSCSNCLDYQARRLLVRYGQTKKMDKADYVHMLNATMCATTRVICAILETH    | 445 |
| XP_013991973.1[S.salar]         | GSAAFRELVSCSNCLDYQARRLRIRYGGTKKMDKADYVHMLNATMCATTRVMCAILETY    | 444 |
| XP_032819422.1[P.marinus]       | GSAAFRELVSCSNCTDYQARRLRIRYGGTKKMDKAEFVHMLNATMCATTRTICAILETY    | 444 |
| XP_018104878.1[X.laevis]        | GSAGFRELVSCSNCTDYQARRLRIRYGGTKKMDKDFVHMLNATMCATTRAICAILENY     | 443 |
| NP_001026563.1[G.gallus]        | GSAGFRELVSCSNCTDYQARRLRIRFGQTKKMDKDFVHMLNATMCATTRTICAILENY     | 444 |
| NP_001191908.1[M.musculus]      | GSAGFRELVSCSNCTDYQARRLRIRYGGTKKMDKDFVHMLNATMCATTRTICAILENY     | 444 |
| NP_006504.2[H.sapiens]          | GSAGFRELVSCSNCTDYQARRLRIRYGGTKKMDKDFVHMLNATMCATTRTICAILENY     | 444 |
| NP_001125910.1[P.abelii]        | GSAGFRELVSCSNCTDYQARRLRIRYGGTKKMDKDFVHMLNATMCATTRTICAILENY     | 444 |

|                                |                                                                 |                 |     |
|--------------------------------|-----------------------------------------------------------------|-----------------|-----|
|                                | ..*:*:** ***:** :*:* *** :                                      | :***** :*:****. |     |
| XP_047126420.1[H.vulgaris]     | QTEGGIIVPELLRPFMGN---VEFIFYKVKTAPIEGNKDVGKSNKKPK-----EK         |                 | 521 |
| XP_00383114.1[A.quenslandica]  | QTEGGVVVPEILRQYMPAYKEFIKFQVAAPHEIPTIKQNMAGMEKDNEAQS----         |                 | 499 |
| XP_001639063.2[N.vectensis]    | QTEGGVVMPPALHLYLPQLD--HLFKVFKVPADDDKPEQQKKQKKKGKNKANNE----SVGC  |                 | 527 |
| XP_019634257.1[B.belcherii]    | QTEGGIIVPELVSTYKPMYGG--TEFITTVKPPIEEQATKKKKAGKKGKVPTQDGPEAEK    |                 | 501 |
| NP_001259982.1[D.melanogaster] | QTETGIKVPKLFPKMYPKAFQDEIPFVKPAPIDLLEAAAEQGKGGKEKTQDKPA--G---    |                 | 500 |
| XP_013991973.1[S.salar]        | QTEGGIIIEVLNIRMPFMGMTEMLIKFVKPAPIDVEMSKSQKKQKQ---dgggkkqqs-G-DQ |                 | 501 |
| XP_032819422.1[P.marinus]      | QTETGVVPELRPFMPPLGKEELKFVKSPAPIDQEGLIKQRKKQ---GDG-----          |                 | 498 |
| XP_018104878.1[X.laevis]       | QTEGGIIVPEKLRSFMPPLGKLDIKFVKPAPIDQELLTKQKKQKQ---EGGKKTE---NGC   |                 | 491 |
| NP_001026563.1[G.gallus]       | QTEGGIIVPEKLRFMPPLQDLIIIFRVKPAPIEGLSLKQKKQKQ---EGGKKKA--GERV    |                 | 501 |
| XP_032819422.1[P.marinus]      | QHEGKIIVPEKLRFMPPLQDLIIIFRVKPAPIDEPSKKQKKQH---EGSKKHA---KEVP    |                 | 499 |
| NP_006504.2[H.sapiens]         | QTEGKITVTPEKLKEFMPGLQELIIPFVKPAPIEQEPSKKQKKQH---EGSKKAAA--RDVT  |                 | 501 |
| NP_00125910.1[P.abelii]        | QTEGKITVTPEKLKEFMPGLQELIIPFVKPAPIEQEPSKKQKKQH---EGSKKAAA--RDVT  |                 | 501 |
|                                | ** *: *:* :* : :                                                | : *:* :***:     |     |
| XP_047126420.1[H.vulgaris]     | IENLNKLNLDVKE-                                                  | 533             |     |
| XP_00383114.1[A.quenslandica]  | -----                                                           | 499             |     |
| XP_001639063.2[N.vectensis]    | LESKLEDVNL---                                                   | 537             |     |
| XP_019634257.1[B.belcherii]    | VTEQVQNMAVNEG                                                   | 514             |     |
| NP_001259982.1[D.melanogaster] | -----                                                           | 501             |     |
| XP_013991973.1[S.salar]        | LQNNQDNMSVHDS                                                   | 513             |     |
| XP_032819422.1[P.marinus]      | LAANLNQNSVHDS                                                   | 504             |     |
| XP_018104878.1[X.laevis]       | LDTQMSMKVHSA                                                    | 511             |     |
| NP_001026563.1[G.gallus]       | LEENQNNMGVSSA                                                   | 512             |     |
| NP_001191908.1[M.musculus]     | LLENQLSMVEITDA                                                  | 514             |     |
| NP_006504.2[H.sapiens]         | LENRLQNMVEITDA                                                  | 514             |     |
| NP_00125910.1[P.abelii]        | LENRLQNMVEITDA                                                  | 514             |     |

## Percent identity matrix:

```
#
#
# Percent Identity Matrix - created by Clustal2.1
#
#
1: XP_047126420.1[H.vulgaris] 100.00 61.35 65.20 67.94 63.19 65.60 66.67 65.73 66.00 66.20 65.80 65.80
2: XP_003383114.1[A.queenslandica] 61.35 100.00 61.46 62.75 61.32 63.71 63.88 65.38 64.31 63.56 63.10 63.10
3: XP_001639063.2[N.vectensis] 65.20 61.46 100.00 66.14 65.18 65.21 67.34 64.34 67.46 66.27 66.27 66.27
4: XP_019634257.1[B.belcheri] 67.94 62.75 66.14 100.00 66.53 68.70 67.94 67.39 69.55 69.82 69.74 69.74
5: NP_001259982.1[D.melanogaster] 63.19 61.32 65.18 66.53 100.00 68.61 68.98 69.03 70.02 68.69 69.01 69.01
6: XP_013991973.1[S.salar] 65.60 63.71 65.21 68.70 68.61 100.00 75.79 77.25 78.95 79.45 78.17 78.17
7: XP_032819422.1[P.marinus] 66.67 63.88 67.34 67.94 68.98 75.79 100.00 75.94 79.17 77.78 76.98 76.98
8: XP_018104878.1[X.laevis] 65.73 65.38 64.34 67.39 69.03 77.25 75.94 100.00 81.60 81.96 81.41 81.41
9: NP_001026563.1[G.gallus] 66.00 64.31 67.46 69.55 70.02 78.95 79.17 81.60 100.00 86.72 85.80 85.80
10: NP_001191908.1[M.musculus] 66.20 63.56 66.27 69.82 68.69 79.45 77.78 81.96 86.72 100.00 95.90 95.70
11: NP_006504.2[H.sapiens] 65.80 63.10 66.27 69.74 69.01 78.17 76.98 81.41 85.80 95.90 100.00 99.81
12: NP_001125910.1[P.abelii] 65.80 63.10 66.27 69.74 69.01 78.17 76.98 81.41 85.80 95.70 99.81 100.00
```
