# Supplementary material for: An Evolutionary Perspective on the Origin, Conservation and Binding Partner Acquisition of Tankyrases
Source: MDPI journal article supplement (doi:10.3390/biom12111688), 2022-11-15
Supplement: s1 [file s1]

# ATG9A

## Homo sapiens:

```
>NP_001070666.1 autophagy-related protein 9A [Homo sapiens]
MAQFDTEYQRLEASYSDSPPGGEEDLLVHVAEGSKSPWHHIENLDLFFSRVYNLHQKNGFTCMLIGEIFEL
MQFLFVVAFTTFLVSCVDYDILFANKMVNHS LHPTPEVKVTLPD AFLPAQVCSARIQENGSLITILVIAG
VFWIHRLIKFIYNICCYWEIHSFYLHALRIPMSALPYCTWQEVQARIVQTQKEHQICIHKRELTELDIYH
RILRFQNYMVALVNKSLPLRFLPLGLGEAVFFTRGLKYNFELILFWGPGSLFLNEWSLKA EYKRGGQRL
ELAQRLSNRILWIGIANFLLCPLILIWQILYAFFSYAEVLKREPGALGARCWSLYGRCYLRHFNELEHEL
QSR LNRGYKPASKYMNCFSLPLLTLLAKNGAFFAGSILAVLIALT IYDEDVLAVEHVLT TTVTL LGVTVTV
CRSFIPDQHMVFCPEQLLRVILAHIHYPMDHWQGNNAHRSQTRDEFAQLFQYKAVFILEE LLSPIVTP LIL
IFCLRPRALEIIDFFRNFTVEVVGVDTC SFAQMDVRQHGHPQWLSAGQTEASVYQQAEDGKTELSMHF
AITNPGWQPPRESTAFLGLKEQVQRDGAASLAQGGLLPENALFTSIQSLQSESEPLSLIANV VAGSSC
RGPPLPRDLQGSRHRAEVASALRSFSPLQPGQAPTGRAHSTM TSGGVDARTASSGSSVWEGQLQSLVLSE
YASTEMSLHALYMHQLHKQQAQAE PERHVWHRRESDES GESAPDEGGEGARAPQSI PRSASYPCAAPRPG
APETTALHGGFQRRYGGITDPGTVPRVP SHFSRRLPLGGWAEDGQSASRHPEPVPEEGSEDELPPQVHKV
```

## Pongo abelii:

```
>NP_001127287.1 autophagy-related protein 9A [Pongo abelii]
MAQFDTEYQRLEASYSDSPPGGEEDLLVHVAEGSKSPWHHIENLDLFFSRVYNLHQKNGFTCMLIGEIFEL
MQFLFVVAFTTFLVSCVDYDILFANKMVNHS LHPTPEVKVTLPD AFLPAQVCSARIQENGSLITILVIAG
VFWIHRLIKFIYNICCYWEIHSFYLHALRIPMSALPYCTWQEVQARIVQTQKEHQICIHKRELTELDIYH
RILRFQNYMVALVNKSLPLRFLPLGLGEAVFFTRGLKYNFELILFWGPGSLFLNEWSLKA EYKRGGQRL
ELAQRLSNRILWIGIANFLLCPLILIWQILYAFFSYAEVLKREPGALGARCWSLYGRCYLRHFNELEHEL
QSR LNRGYKPASKYMNCFSLPLLTLLAKNGAFFAGSILAVLIALT IYDEDVLAVEHVLT TTVTL LGVTVTV
CRSFIPDQHMVFCPEQLLRVILAHIHYPMDHWQGNNAHRSQTRDEFAQLFQYKAVFILEE LLSPIVTP LIL
IFCLRPRALEIIDFFRNFTVEVVGVDTC SFAQMDVRQHGHPQWLSAGQTEASVYQQAEDGKTELSMHF
AITNPGWQPPRESTAFLGLKEQVQRDGAASLAQGGLLPENALFTSIQSLQSESEPLSLIANV VAGSSC
RGPPLPRDLQGSRHRAEVASALRSFSPLQPGQAPTGRAHSTM TSGGVDARTASSGSSVWEGQLQSLVLSE
YASTEMSLHALYMHQLHKQQAQAE PERHLWHRRESDES GESAPDEGGEGARAPQSI PRSASYPCAAPRPG
APETTALHGGFQRRYGGITDPGTVPRAP SHFSRRLPLGGWAEDGQSASRHPEPVPEEGSEDELPPQVHKV
```

## Mus musculus:

```
>NP_001003917.2 autophagy-related protein 9A isoform a [Mus musculus]
MAQFDTEYQRLEASYSDSPPGGEEDLLVHVAEGSKSPWHHIENLDLFFSRVYNLHQKNGFTCMLIGEMFEL
MQFLFVVAFTTFLVSCVDYDILFANKMVNHS LHPTPEVKVTLPD AFLPAQVCSARIQENGSLITILVIAG
VFWIHRLIKFIYNICCYWEIHSFYLHALRIPMSALPYCTWQEVQARIVQTQKEHQICIHKRELTELDIYH
RILRFQNYMVALVNKSLPLRFLPLGLGEVAVFFTRGLKYNFELILFWGPGSLFLNEWSLKA EYKRGGQRL
ELAQRLSNRILWIGIANFLLCPLILIWQILYAFFSYAEVLKREPGALGARCWSLYGRCYLRHFNELEHEL
QSR LNRGYKPASKYMNCFSLPLLTLLAKNGAFFAGSILAVLIALT IYDEDVLAVEHVLT TTVTL LGVTVTV
CRSFIPDQHMVFCPEQLLRVILAHIHYPMDHWQGNNAHRSQTRDEFAQLFQYKAVFILEE LLSPIVTP LIL
IFCLRPRALEIIDFFRNFTVEVVGVDTC SFAQMDVRQHGHPQWLSGGQTEASVYQQAEDGKTELSMHF
AITNPGWQPPRESTAFLGLKEQVQRDGAAGLAQGGLLPENALFTSIQSLQSESEPLSLIANV VAGSSC
RGPSLSRDLQGSRHRADVASALRSFSPLQPGAAPQGRVPSTM TSGGVDARTASSGSSVWEGQLQSLVLSE
YASTEMSLHALYMHQLHKQQTQAE PERHVWHRRESDES GESAPEEGGEGARAPQPI PRSASYPCATPRPG
APETTALHGGFQRRYGGITDPGTVPRGPS HFSRRLPLGGWAEDGQPASRHPEPVPEEGSEDELPPQVHKV
```

## Gallus gallus:

```
>NP_001029993.2 autophagy-related protein 9A [Gallus gallus]
MAHLETQYQRLESSSTESP PGGGDLLVHVPEGA KSPWHHIENLDLFFSRVYNLHQKNGFTCMLIGEIFEL
MQFI FVVAFTTFLVSCVDYDILFANKAVNHS QHPSEPIKVTLPD AFLPPNVCSARIQANSFLICILVIAG
VFWIHRLVKFIYNICCYWEIHSFYNALRIPMSNL PYYTWQEVQARIVQIQKEHQICIHKKELTELDIYH
RILRFKNYMVAMVNKSLPLIRFLPLPLGDTVFYTRGLKYNFELIFFWGPGSLFENEWSLKA EYKRAGNRL
ELAEKLSTRILWIGIANFLLCPLILIWQILYAFFSYTEILKREPGSLGARCWSLYGRCYLRHFNELDHEL
QSR LSKGYKPASKYMNCFSLPLLTIVAKNVAFFAGSILAVLIALT IYDEDVLAVEHVLT TTVTL LGVGITV
CRSFIPDQHLVFCPEQLLRVILAHIHYPMDHWQGNNAHYETRDEFAQLFQYKAVFILEE LLSPIITPLIL
IICLRPKSLDIVDFRNFTVEVVGVDTC SFAQMDVRQHGHPAWMSAGKTEASIYQQAEDGKTELSMHF
AITNPKWQPPRESTAFIGFLKERVHRDSSVALQQA VLPENALFSSIQSLQSESEPHSLIANVIAGSSVL
GFHMGRDQGASRHLSEVASALRSFSPLQSAQQPSGGGFQTAGRDGEGTQPRGSAMTASGADARTMSSGSS
AWEGQLQSMILSEYASTEMSLHALYMHQLHKQHAQLEPERHTWHRRESDES GESTHEELDAQRGAPVPLP
RSASYPFSSRQPAEETATLQTGFQRRYGGITDPGTVHRA PSHFSRRLPLGGWAEDGQSARHPEPVPEESSE
DELPQPIHKV
```

## Xenopus laevis:

```
>XP_018094208.1 autophagy-related protein 9A [Xenopus laevis]
MAMYDTPYQRLEASTD SPLGEDDLLVHVPEGSKSPWHHIENLDLFFSHVYNLHQKNGFTCMLIGEIFEL
LQFIFIVSFTTLLVSCVDYDILFANKMVNHS QSDHVKVTLPDAFLPPGVC RDRMQENGFLVCLLA IAGVF
WTHRLIKFIYNICCYWEIHNFYMQALRIPMSDL PYYTWEEVQSRIVQIQKEHQICIHKKELSEL DVSHRI
LRFKNYMVAMVNKNLLPLQHRFLPLLGNTVFYTRGLKYNFQLIFFWGPGCLFQNEWSLKP EYKRSGARLEL
SEKLAQRILWIGLANLVLCPLVLVWQILYAFFSYTEVLRREPGSLGARCWSLYGRCYLRHFNELDHQLQA
RLSRAYKPASKYMNCFSLPLLAVVAKHFGFLAGSILAVLIALT VYDEDVLAVEHVLSAVTLLGIVVTCR
SFIPDQHLVFCPEQLLRVILAHIHYPMDHWQRS AHRAE TRGEFSQLFQYKAVFILEE LLSPLLTPLVLFF
```

CLRPKSLEIIDFFRNFTVEVVGVDTCSCFAQMDVRQHGNPAWMSAGKTEASIYQQAEDGKTELSLMHFAI  
TNPRWQPPRECSAFLSQLRERVQRDSTMGNQKHPTGLMQPLQCSGLSIQSDPEPHSLMANMFSGVSTAGF  
PANTEALGSPHVSAYSEVASALHSLSPQQSCHFPVQSQSGISADFRNGSFGSNVWEGPMNSGTLSEYASTE  
MSLHALYMHELHQHQTMAPGRHIWHRQESDESSESSQGEGLINTTNSNPSSLSLCPSPAAAWEERLPLPL  
STHRLSASTDLGSSVQRTSLARQPMGGWSESDVQPSRLPEFPVPEEGSEDELPQVQKV

### Salmo salar:

>XP\_014005943.1 autophagy-related protein 9A [Salmo salar]  
MAAHFDTEYQRLEASYSDSPGGEENLLVHIPDGNKSPWHHIENLDLFFQRVYNLHQKNGFTCMLLGEVFE  
LVQLLFVVGFVTLFANCDVDYDILFANKFVNHTDSSKVTLPDAFLPVDVCSASIRDNAVVMFVLMISGVFW  
LHRLIKFIYNVCCYWEIRSFYTNALKMSMAELPYFTWQEVQARIVEIQKEHQICIHKKELTELDIYHRIL  
RFKNYVMAMINKSLLPVRF**RPPLLGES**VFYTRGLKYNFELIFFWGPGLFESEWSLKPQYKRGGNRLELA  
DKLASRILWIGIANLVLCPVVLVWQILYAFFSYTEVIKREPGLGARCWSLYGRCYLRHFNELDHLMMSR  
LSKGYKASSRYMNCFLSPLLTVVAKNVAFFAGSLLAVLIAALTIYDEDLAVEHVLSSITLLGVCITVCRS  
FIPDKHLVYCPQQLRLVILAHIHYPMDHWQGNNAHRYETRDQFSQLFYKAVFILEELISPLVTPFILIFS  
LRRKLEIIDFFRNFSEVVGVDTCSCFAQMDIRQHGHPAWMSEGKTEASIYQQAEDGKTELSLMHFAIT  
NPQWQPPTTETTHFISQLKERVQREATGDRHTLTSLSGSEPRSLIANFLAGPPSLASLHLGRDGSLTNHGP  
VGVSDGASALRSLSSMRGSCSSAHRAGHASSASRAMPGSSDARTASSGSSVWEGQLTSLVLSEYAS  
TEMSVHALYIHELHKQQSGGELSRLTWHRRQDSDSDSDSVTEEGSGGGNPNPRNP1PRSHTFPISTPITT  
PGPIPPSSNSGPNDRGTTTPGQDVTPLQSNSQRRYGGNTDSVGPPEGRVVR SARVPMGGWAEEGRGGRHPDT  
VPEEGSEDDMPNIHKVT

### Petromyzon marinus:

>XP\_032801920.1 autophagy-related protein 9A-like isoform X1 [Petromyzon marinus]  
MAEÄETGYRRLDSYDEESPNHERVLVHVPEGSKARWNHIENLDFFTRIYHFHQKHGFACMMLAEFFE  
LVQFLFVVFTTFTFLINCDYDILFANKQVHPQPSRKVTLYDALLSSEKTERIRGNSWIIIFLIVMAGTFW  
LYRLIKVIYNFSSYLEIRAFYINAKIIPMAELQNFSWQEVQERVLAQKEQQMCIHKRELTEDMHHRIL  
RFKNYLVAMVNKSLLPVVR**RVFPAGES**ALLTQGLKYNLEMLLFWGPGAPFQSAWSLRPEYKRAGCRLELA  
ERLGRITILLVGLANLVLCPLVVVWQVLHAFFRYAIEVLKREPGLGARRWSLYGQLYLRHLNELDHLELRAR  
LGRGYRHAARYMDSFTAPMMAVLAKNVTFFAGSLLAVLLALTVDVDEDLVSEHVLTATITAGVLLTVCRA  
FIPDEHLVWNPPEHLLQAVLAHIHYMPEHWKGAHKTETRDEFSQLFYKAAFIMEELLSPITPFILIFG  
VRPKALEIVDFFRNFTVEVVGVDVCSFAQMDIRRHGNPTWMSAGQTEASYQQAEDGKTELSLVHFAIS  
NPRWRFPGRSNVYLLQLREQVQRDSTANPQPLLFSLSQTIESQSGPYGLLGSMLGGPSSLTAYRSTRDAT  
CSLPPEMSAATAAATALMSLMPASLTPGPREELAEMPDPSTPGNTTVTARPGSSSTGAVGMSMSTGGRGK  
VSFGGTDFRSSSVGSSFFREGPSQSSILSEFASAEMSLHAIYMHEARRNYATSDAQARYHWQQPENNGDDD  
TMDEVNALSGFRESSLQLHNTGSNSGSHSSVLGSGQRETYVSPASIGHSGDYMPNIGSLQDTHGDSL  
GLMVTRENTELGAFPRHYGGTSASENMLQPEQGSPRFGLMPMGWQEDMAGLGTIDPHGGVPSCMSPNP  
QQINEVAYTFHSLFLNT

### Branchiostoma belcheri:

>XP\_019613418.1 PREDICTED: autophagy-related protein 9A-like isoform X1 [Branchiostoma belcheri]  
MAQLETSYRRLDSFYDEEMDSPNERELLVHAVDSNKAHRWNHIENLDFFTRVYQYHQRHGFLCMMLA  
VLELLQFIFVLLFTTFLQCCHYEVLFGDKNPHDPDRKVTLPALVPLDQCASSLDSRIVCVLVLASFFWF  
LRFIKVYNYFFRYWEIRTFYTAQIKISHNDLPNMTWHEVQRCLRQVQVEQQMCIHKQELTELDIYHRILR  
FKNYTVAMVNKSLLPLKFQLPGMGELVFLTNGLKYNLEMLFWGPPWSPFANNWHLKEDYKKS SKRLELAN  
KLRSRHLVWGVANLLCPFILMWQILYSFTTYAEVLKRQPGSLGARKWSLYGRLYLRHFNELDHENLARL  
TRAYKPAEKYMSSFISHVMTLIARHVAFLAGAIFAVLVVLTIIYDEDLVLTIEHVLTITITLMGVLVAGCRAL  
IPDENMVFCEPQLMVCILAQIHYMPDRWKQGAHTYVRDEFSQLFYKAVFLLEELLSPITPLILIFSL  
RSKALDIVDFFRNFTVDVVGVDVCSFAQMDIKRHGNPQWTGEKQQTQDVSQYHQAEDGKTELSLMHFTLT  
NPTWQPPRHCNKFINHLKEQAHKDVNMLNSAVMVDNPPFQSLQSLSSAGYPSMMTSLMVGRLGPDATLVP  
PRDPGTGTPEPSQPGVALPGTATAPGRYGLVRGDISSVEGPIQAPNTGLLGSSTMAPRGTASISHTLPPTPE  
PVSLQETMAPTELMAAEMSFSALYMHQLHQTQTHDHQDQEAQRARWRQLPAPAFYGTTPMANQQRPSPGS  
VEDSRTSEPGQWHVSGSTTMPGIDEAPSEETDTLSYSPPNV

### Drosophila melanogaster:

>NP\_611114.1 Autophagy-related 9, isoform A [Drosophila melanogaster]  
MSSPHINYRSLAEAAAPFLEHHPSTGQGPSKTQDAKANAAAHLDPGLEHGLEQLDEHDTHEGEDTP  
RNSGVMIHMVPETGARARNHIEDLDSFFSRMYQQYQKHGFTVIIVDEMLQVLEFGFVVWLLAFVMHCVR  
DVLFGDTPPGGLNPNKTTLSDMVYPTGECANFTWVTVLVVFIAAIYLGIRLLKMVYHITQYADIKRFYN  
SALHIEDSDLDNFTWHEVQQRIRRVQAEQHMCI DKESLTELD IYHRVLRFKNYLVALMNKQLLPVRFHIP  
LYGEVVSLSRGMLFNIDFILFRGPGSPFQNNWQLRDEFVAVRSNQTELAQRLSKLILGVALNLVLAPVIF  
VWQLIYFSFSYANILRKEPGALGLRTWSNYGRLYLRHFNELDHELDARLNRAVDYADRYLNSFSPLAAV  
IAKNLLFISGGLLLILALGIYEEHVQVEHLLAILAGLGAIGVVCRTLIPDENLVWCPEQLMTAILAHV  
HYLPSEWRQQAHTTKVRQEFSNFFQFKAGYLLSEIFSPFVTPFVLIFVFRPKAIELVRFRTFTVSVRGV  
GNVCSFAQMDVRKHGNPDQLTSELEEMTRATAQQPQQEPQQQSLAGGKTEMSLLRFTLNNPEWQMPKEA  
KQFLRGVREHAVGELVQAKTSMVQENPLTNSLISFGTMGADYCSIANSVLTAQVTPQQLEISQSLRPGLG  
PVSGGFPVAASDFRQMLQNNLSASVGPLDSMRRLRLSRAEGRLEGPTDTLLYGLCGVDPRVGSTPLNVGV  
ADMCLSALYLHELNQKQARQSRIDEAEEDERPGTSHWPPRPPAAPASADTGFGRSHTVITSKAAESTPL  
GSIRS

### Hydra vulgaris:

>XP\_012564588.1 PREDICTED: autophagy-related protein 9A-like [Hydra vulgaris]  
MMTSFNsipYVRVAPEEDSEFSELPPTVVTTKGVDKNGCWTHIENLDEFFTEVYTYHQLGQFVCLLLRDV  
FELTQYIFIVLFGTFLLVCDYKKLFSDPNPVFVEVIHWNNFQMPSSVILCLVVALFWLVRLCRVIFR  
VYRRWHIRKFFYQVHLITDADLRNMQWNEVQHKLILMQQVHQLCIHVKELTELDINHNRILRQKNYMSFQ  
NKGIIPICIYHFFPIGKRTFLTEGLKFNLLNLI LFNFGPAPFKNSWKLKEEYKDYSCRMVLAASLSHRIFML  
GVLNLLCFPIMYQVLYSFFMYAELIKRSPDVFGARRWSPFGRLYLRHFNELDHFEQSRNLKAYMPATR

YMNVFTSPIITIFAKNIAFFSGAILAVLLGLSFYDKDVLTAEHVLSFMATLGIIIKICSGFIPDEHMFVC  
PETLMKQILSNTHYIPEEWKGRAHTMEVREEFKMFQYKFICLLEELMSPLLTFFILCFGLRYKALQIVD  
FYRNFTVEVAGLDVCSFAQMDIRKHGAKNWSDEGCSKEDQMLSAESQAENAKTELSLLNFSIKNPDWKP  
SSHGKQFIDTIKEQAFQESLSHSLSSNQTPFNAGTSFDFTNFIGLQSIAYPALDPAIMVSRNDDVLRNSI  
MYLHEVQNRRPISVTSLSKSSYGDNAFENSDDLRRTWFSATSGQTSFGVNKENLLPRYSAMKNPADDRL

### **Nematostella vectensis:**

>XP\_032240258.1 autophagy-related protein 9A [Nematostella vectensis]  
MSEFKTQYQRLNSVDDSEEDLPPQGfHVgTRGLEEIEKGRWNHIENLDEFFIRVYEHRRHdGFACILLTQ  
CFELVQFAFVVLFTSfLLLCVDYDKLFKNPDPTfSEVVHFHKIEHMEPAIVVCLVIALLFWFfIRLARVFI  
YFFKLEIRMfYKNALKIPeSIVNLQWQDVQKRlEIQKIHQMCVHKEELTEldIHHRILRWKNYfVAM  
QNKGVIPCTY**YFFFLGQR**TfLTeGMKYNLKMILfWGPGSPfQDNWKLrDDfKNLSKRSALADRLSRRIFW  
IGVANfLLCPfILLWVVLySFFSYAELVKRAPDALGARRWSPYGRlFFRHfNELDHEfQARLNKAYEPAQ  
KYLNIffSSPFLAIiAKNVAFLAGAVfAVLTtFTLVDRDVLMAEHMLAVIAGlGILIRGCYVFIPNENLVW  
NPEQLMRQILSYTHYIPETWKGKAHTTEVRDQFAQIFQYKLVNVEELVSPVVTPfLLCFSLRYKALDIV  
DFYRNFTVDVVGVGDVCSFAQLDVKKHGnPEWLSEGLSEATQYEQaENGKTELSLLHfSIRNPawkPSDR  
GAHFISTIKENAIHEGLNIAGSVTLSEPCSLQDFRSFDCLPGLPYEPAMATSDPTAGLQGGVKAADTRRS  
REQHTeALMNTSMLYMHELHSRQADHSMHEVSYPsGPSTQSPRRPETSGLFEETGLTYQAREQTfEQEMT  
YMARSHGPEVAFHPGLSGQLGRVEEGSQALHSTSPtAGNssSQtNEQRDRDQETMVNF

### **Amphimedon queenslandica:**

>XP\_003384679.1 PREDICTED: autophagy-related protein 9A-like [Amphimedon queenslandica]  
MSKKTRYMRLETDPESSQSSDDdAPPTHiPLHSSQYVKESKWNHIENLDEFFDWVYQYLINHGlfAIVLN  
DILELGQFAFLCIfSAFLITCINfKNLFADDVYTNETGVKDVAfGDVIEIDRLEHINPLLVlILFFAfIF  
WFHRlCKTIWRFFKfLGIrrFYIEALDIPPSDLrNYNWRDVLERLKSaQNTHKMNIRKQELTEIDVYHRI  
LRfKNYmVAMINKDVLsYKiWIPfYGEKVfFTMGlKYNyELLfWGPgAPfKNnyHLHEEYkTAAKkYEL  
IQKLRFrITVLALVNLVfSPfIFLYQILySFFTYAELLKRQPGVfGRRRWSlFGKIFLRHfNELDHeliV  
RLNRAyLPAGKYMDLFVLpVATILARNVAFVAGSLlAVLFTLTlVIQEDLLTAHNlTlTlGLGVIVTLcR  
IfIPNEHQTRDPKELMTEIEEIHYPMDLWKEKpHTVQVSSQfSqvFQLTIAYLiDELLSPlVTPfILyF  
SLRNKSQDIIDfLRNFTIDVSGVGdVCSfAEMNLrKHGHSEWQQNSQlARSTDYERSElGkTEISLLNfT  
QKNPNWEAGEDADTfLTQLKESVEELHSSQqqqqQSLtLSREdSPpLSLSSHQfGVSRlQGSMdTSIW  
ASfTSANDEASSLTPLKLHQVHDVMKtSHGQGSSSSAApPPPIGSIVPSYHPPPPQpQEVALTVYDHCL  
PSDSSLSSADIRLESTIGHTPSTAGGLTEPFLPRDSEPPPQT

## Alignment:

|                                       |                                                                       |     |
|---------------------------------------|-----------------------------------------------------------------------|-----|
| NP_611114.1[D.melanogaster]           | MSSPHINYRSLAEEAASPFLHEHPSTGGQPSKTQDAKANAAAAHLDPLEHGLEQPLDEH           | 60  |
| XP_003384679.1[A.queenslandica]       | -----MSKTRYMRLETDP-ES                                                 | 16  |
| XP_012564588.1[H.vulgaris]            | -----MMTSFNISIPYVRVAPEE-D-                                            | 18  |
| XP_032240258.1[N.vectensis]           | -----MSEFK-TQYQRLNSV--D-                                              | 15  |
| XP_019613418.1[B.belcheri]            | -----MAQLE-TSYRRLDSF--Y-                                              | 15  |
| XP_032801920.1[P.marinus]             | -----MAEAE-TGYRRLDSY--D-                                              | 15  |
| XP_014005943.1[S.salar]               | -----MAAHFD-TEYQRLAS--Y-                                              | 16  |
| XP_018094208.1[X.laevs]               | -----MAMYD-TPYQRLAS--Y-                                               | 15  |
| NP_001029993.2[G.gallus]              | -----MAHLE-TQYQRLSS--S-                                               | 15  |
| NP_001003917.2[M.musculus]            | -----MAQFD-TEYQRLAS--Y-                                               | 15  |
| NP_001070666.1[H.sapiens]             | -----MAQFD-TEYQRLAS--Y-                                               | 15  |
| NP_001127287.1[P.abelii]              | -----MAQFD-TEYQRLAS--Y-                                               | 15  |
| :                                     |                                                                       |     |
| NP_611114.1[D.melanogaster]           | DTEHEGEDTPRNSGVMIHMPETGRARWNHIEDLDSFFSRMYQYQKHGFTVIVVDEMLQ            | 120 |
| XP_003384679.1[A.queenslandica]       | SQSSDDAPPTH--IPLHSSQYVKESKWNHLENLDEFFDWVYQYLINHGLFAIVNDILE            | 74  |
| XP_012564588.1[H.vulgaris]            | --DEFSELPTTV--VTTKGV--DKNGCWTHIENLDEFFTEVYTYHQLQGFCVLLRDVFE           | 72  |
| XP_032240258.1[N.vectensis]           | --DSEEDLPPQGFGHVGTRGLEEIEKGRWNHLENLDEFFIRVYEHHRDGFACILLTQCFE          | 73  |
| XP_019613418.1[B.belcheri]            | --DEEMDSPPNERELLVHAVDSNKAHRWNHLENLDDFFTRVYQYHQRHGLCMLAEVLE            | 73  |
| XP_032801920.1[P.marinus]             | --DE--ESPNHEREVLVHVPEGSK-ARWNHLENLDYFFTRIYHFHQKHGFACMLAEFFE           | 70  |
| XP_014005943.1[S.salar]               | ---S--DSPPGEENLVHVPDGNK-SPWHHLENLDLFFQVRVYNLHQKNGFTCMLLGEVFE          | 70  |
| XP_018094208.1[X.laevs]               | ---T--DSPLGEDDLLVHVPEGSK-SPWHHLENLDLFFSHVYNLHQKNGFTCMLLGEIFE          | 69  |
| NP_001029993.2[G.gallus]              | ---T--ESPPGGDDLHVHVPEGAK-SPWHHLENLDLFFSRVYNLHQKNGFTCMLLGEIFE          | 69  |
| NP_001003917.2[M.musculus]            | ---S--DSPPGEEDLLVHVAEGSK-SPWHHLENLDLFFSRVYNLHQKNGFTCMLLGEIFE          | 69  |
| NP_001070666.1[H.sapiens]             | ---S--DSPPGEEDLLVHVAEGSK-SPWHHLENLDLFFSRVYNLHQKNGFTCMLLGEIFE          | 69  |
| NP_001127287.1[P.abelii]              | ---S--DSPPGEEDLLVHVAEGSK-SPWHHLENLDLFFSRVYNLHQKNGFTCMLLGEIFE          | 69  |
| : : : * ** : * : . : : :              |                                                                       |     |
| NP_611114.1[D.melanogaster]           | VLEFGFVWLLAFVVMHCVRFVDVFGDTPPGG---LNPNTTSLSDVMYPTGECLANFTWV           | 176 |
| XP_003384679.1[A.queenslandica]       | LQGFALCIFSALITCINFKNLFADDVYTNET---GVKDV---AFGDVIEIDRLEHIN             | 127 |
| XP_012564588.1[H.vulgaris]            | LTQYIFIVLFGTFLLVCDYKKFLSDPNPVFE-----VIHWNFNKQMP                       | 116 |
| XP_032240258.1[N.vectensis]           | LVQFAFVVLFTSFLLLCVDYDKLFKNPDPTFSE-----VVHFHKEIEME                     | 117 |
| XP_019613418.1[B.belcheri]            | LLQFIFVLFTFLLQCVHYEVLFQDK-----NPHPRKVTLPALVPLDQCASSLDS                | 126 |
| XP_032801920.1[P.marinus]             | LVQFLFVVTFTTFLNCDYDILFANKQV---HPQPSRKVTLYDALLSSEKCTERIRGN             | 126 |
| XP_014005943.1[S.salar]               | LVQLLFVVGFTVFLANCVDYDILFANKFVNHT---DSSKVTLPDAFLPVDVCSASIRDN           | 126 |
| XP_018094208.1[X.laevs]               | LLQFIFIVSFTLLVSCVDYDILFANKMVNHSQ---SDHVKVTLPDAFLPPGVCRRMQEN           | 127 |
| NP_001029993.2[G.gallus]              | LMQFIFVVAFTTFLISCVDYDILFANKAVNHSQHPSEPIKVTLPDAFLPPNVCSARIQAN          | 129 |
| NP_001003917.2[M.musculus]            | LMQFLFVVAFTTFLVSCVDYDILFANKMVNHSQHPTEPVKVTLPDAFLPAQVCSARIQEN          | 129 |
| NP_001070666.1[H.sapiens]             | LMQFLFVVAFTTFLVSCVDYDILFANKMVNHSQHPTEPVKVTLPDAFLPAQVCSARIQEN          | 129 |
| NP_001127287.1[P.abelii]              | LMQFLFVVAFTTFLVSCVDYDILFANKMVNHSQHPTEPVKVTLPDAFLPAQVCSARIQEN          | 129 |
| : : * : : : * : . : * :               |                                                                       |     |
| NP_611114.1[D.melanogaster]           | T--YLVVFFIAIYLGIRLLKMVYHITQYADIKRFYNSALHIEDSLDNFTWHEVQQRIRR           | 234 |
| XP_003384679.1[A.queenslandica]       | PLLVLILFFAFIFWFHRLCKTIWRFFKFLGIRRFYIEALDIPPSDLRNNWRDVLRLKS            | 187 |
| XP_012564588.1[H.vulgaris]            | SSVLICLVVALLFWLVRCLRVIFRVYRRWHIRKFFYQVLHITDADLRNMQWNEVQHKLLI          | 176 |
| XP_032240258.1[N.vectensis]           | PAIVVCLVIALFWFIRLARVFIYFFKLEIRMFYKNALKIPSEIVNLQWQDVQKRLIE             | 177 |
| XP_019613418.1[B.belcheri]            | -RIVVCLVLASFVFLRFIKVYVNFYRWEIRTFYQALKISHNDLPNMTWHEVQRCLRQ             | 185 |
| XP_032801920.1[P.marinus]             | SWIIFLIVMAGTFWLYRLIKVIYNFSSYLEIRAFYINALKIPMAELQNFSEQVEQERVA           | 186 |
| XP_014005943.1[S.salar]               | VAVMEVLMISGVFWLHRLIKFIYNVCCYWEIRSFTYTNALKMSMAELPYFTWQEVQARIVE         | 186 |
| XP_018094208.1[X.laevs]               | GFLVCLLAIAGVFWLHRLIKFIYNICCYWEIHNFMQALRIPMSDLPYTTWEEVQSRIVQ           | 187 |
| NP_001029993.2[G.gallus]              | SFLICILVIAGVFWLHRLVVKFIYNICCYWEIHSFYINALRIPMSNLPYTTWQEVQARIVQ         | 189 |
| NP_001003917.2[M.musculus]            | GSLITILVIAGVFWLHRLIKFIYNICCYWEIHSFYLHALRIPMSALPYCTWQEVQARIVQ          | 189 |
| NP_001070666.1[H.sapiens]             | GSLITILVIAGVFWLHRLIKFIYNICCYWEIHSFYLHALRIPMSALPYCTWQEVQARIVQ          | 189 |
| NP_001127287.1[P.abelii]              | GSLITILVIAGVFWLHRLIKFIYNICCYWEIHSFYLHALRIPMSALPYCTWQEVQARIVQ          | 189 |
| : : : * : . : * : * : * : * : *       |                                                                       |     |
| NP_611114.1[D.melanogaster]           | VQAEQHMCDIKESLTELDIIYHRLVRFKKNYLVALMNKQLLPVRFHIPLYGEVVSLSRGLMF        | 294 |
| XP_003384679.1[A.queenslandica]       | AQNTHKMNIRKQELTEIDVYHRLRFKNYVMAMINKDLSYKIWIPIFYGEKVFFTMGLKY           | 247 |
| XP_012564588.1[H.vulgaris]            | MQQVHQLCIHVKELTELDIHNRLRQKNYMISFQNKGIIPCIYHFFFIGKRTFLTEGLKF           | 236 |
| XP_032240258.1[N.vectensis]           | IQKIHQMCVHKEELTELDIHHRLRWKNYFVAMQNKGVIPCTY <b>RFFFLGQR</b> FTLEGMKY   | 237 |
| XP_019613418.1[B.belcheri]            | VQVEQQMCIHKQELTELDIIYHRLRFKNYTVAMVNKSLPLKFQLPGMGELVFLTNGLKY           | 245 |
| XP_032801920.1[P.marinus]             | VQKEQQMCIHKRELTELDMMHRLRFKNYLAMVNKSLLPVRV <b>RVPFAGES</b> ALLTQGLKY   | 246 |
| XP_014005943.1[S.salar]               | IQKEHQICIHKKELTELDIIYHRLRFKNYVMAMINKSLLPVRF <b>RPPLLGES</b> VFYTRGLKY | 246 |
| XP_018094208.1[X.laevs]               | IQKEHQICIHKKELSELVSHRLRFKNYVMAMVNKNLLPLQH <b>RLPLLGNT</b> VFYTRGLKY   | 247 |
| NP_001029993.2[G.gallus]              | IQKEHQICIHKKELTELDIIYHRLRFKNYVMAMVNKSLPIRF <b>RLPLLGD</b> VFYTRGLKY   | 249 |
| NP_001003917.2[M.musculus]            | TQKEHQICIHKKELTELDIIYHRLRFQNYMVALVNKSLPLRF <b>RLPGLGEV</b> VFFTRGLKY  | 249 |
| NP_001070666.1[H.sapiens]             | TQKEHQICIHKKELTELDIIYHRLRFQNYMVALVNKSLPLRF <b>RLPGLGEV</b> VFFTRGLKY  | 249 |
| NP_001127287.1[P.abelii]              | TQKEHQICIHKKELTELDIIYHRLRFQNYMVALVNKSLPLRF <b>RLPGLGEV</b> VFFTRGLKY  | 249 |
| * : : : . : * : * : * : * : * : * : * |                                                                       |     |
| NP_611114.1[D.melanogaster]           | NIDFILFRGPGSPFQNNWQLRDEFAYRSNQTELAQRLSKLILGVALNLVLAPVIFVWQL           | 354 |
| XP_003384679.1[A.queenslandica]       | NYELLFWGPGAPFFNNYHLHEEYKTAACKYELIQKLRFRITVLALVNLVFSPPFIIFYQI          | 307 |
| XP_012564588.1[H.vulgaris]            | NLNLLIFNGPGAPFFNSWKLKEEYKDYSCRMVLAASLSHRIFMLGVNLFLCPFTIMIYQV          | 296 |
| XP_032240258.1[N.vectensis]           | NLKMILFWGPGSPFDQNWKLRDDFKNLSKRSALADRLSRRIFWIGVANFLCPFILLWVW           | 297 |
| XP_019613418.1[B.belcheri]            | NLEMILFWGPGSPFFANNWHLKEDYKSSKRLELANKLNRHLVWGVANLLCPFILLMQI            | 305 |
| XP_032801920.1[P.marinus]             | NLEMILFWGPGAPFQSAWSLRPEYKRAGCRLELAERLGRITLLVGLANLVLCPLVVVVQV          | 306 |
| XP_014005943.1[S.salar]               | NFELIFFWGPGSLFSEWSLKPQYKRGGRNLELADKLASRLWIGIANLVLCPLVVLWQI            | 306 |
| XP_018094208.1[X.laevs]               | NFOLIFFWGPGCLFQNEWSLKPQYKRSARGARLESEKLAQRILWIGIANLVLCPLVVLWQI         | 307 |
| NP_001029993.2[G.gallus]              | NFELIFFWGPGSLFENWSLKAERYKRNRLLEAEKLSRILWIGIANFLCPLILLWQI              | 309 |

|                                 |                                                                                                                                          |     |
|---------------------------------|------------------------------------------------------------------------------------------------------------------------------------------|-----|
| NP_001003917.2[M.musculus]      | NFELILFWGPGSLFLNEWSLKAEYKRGGRLELAQRLSNRILWIGIANFLLCPLILIWQI                                                                              | 309 |
| NP_001070666.1[H.sapiens]       | NFELILFWGPGSLFLNEWSLKAEYKRGGRLELAQRLSNRILWIGIANFLLCPLILIWQI                                                                              | 309 |
| NP_001127287.1[P.abelii]        | NFELILFWGPGSLFLNEWSLKAEYKRGGRLELAQRLSNRILWIGIANFLLCPLILIWQI<br>* . : : * * * . * . : : * : : . : * * * * : : * : : * . : : : :           | 309 |
| NP_611114.1[D.melanogaster]     | IYFSFSYANILRKEPGALGLRTWSNRYGRLYLRHFNELDHEDARLNRAYDYADRYLNSFS                                                                             | 414 |
| XP_003384679.1[A.queenslandica] | LYSFFTYAELLKRQPGVFGRRRWSLFGKIFLRHFNELDHEDLIVRLNRAYLPAGKYMDLFV                                                                            | 367 |
| XP_012564588.1[H.vulgaris]      | LYSFFMYAELIKRSPDVFGARRWSPFGRLYLRHFNELDHEFQSRINKAYMPATRYMNVFT                                                                             | 356 |
| XP_032240258.1[N.vectensis]     | LYSFFSYAELVKRAPDALGARRWSPYGRLLFFRHFNELDHEFQARLNKAYEPAQKYLNIFS                                                                            | 357 |
| XP_019613418.1[B.belcheri]      | LYSFFTYAEVLKRQPGSLGARKWSLYGRLYLRHFNELDHEDARLNRAYKPAEKYMSFFI                                                                              | 365 |
| XP_032801920.1[P.marinus]       | LHAFFRYAEVLKREPGLSGARRWSLYGRLYLRHFNELDHEDARLNRAYGRYRHAARYMDSFT                                                                           | 366 |
| XP_014005943.1[S.salar]         | LYAFFSYTEVIKREPGLSGARCWSLYGRCYLRHFNELDHEDARLNRAYGRYRHAARYMDSFT                                                                           | 366 |
| XP_018094208.1[X.laevis]        | LYAFFSYTEVLRRREPGLSGARCWSLYGRCYLRHFNELDHEDARLNRAYGRYRHAARYMDSFT                                                                          | 367 |
| NP_001029993.2[G.gallus]        | LYAFFSYTEILKREPGLSGARCWSLYGRCYLRHFNELDHEDARLNRAYGRYRHAARYMDSFT                                                                           | 369 |
| NP_001003917.2[M.musculus]      | LYAFFSYAEVLKREPGLSGARCWSLYGRCYLRHFNELDHEDARLNRAYGRYRHAARYMDSFT                                                                           | 369 |
| NP_001070666.1[H.sapiens]       | LYAFFSYAEVLKREPGLSGARCWSLYGRCYLRHFNELDHEDARLNRAYGRYRHAARYMDSFT                                                                           | 369 |
| NP_001127287.1[P.abelii]        | LYAFFSYAEVLKREPGLSGARCWSLYGRCYLRHFNELDHEDARLNRAYGRYRHAARYMDSFT<br>: : * * : : : : * . : * * * * : * : : * : : * : : * : : * : : * : : *  | 369 |
| NP_611114.1[D.melanogaster]     | SPLAAVIANKLLFISGGLLLLILALGIYEEHVQVEHLLAILAGLGAIGVVCTRLIPDEN                                                                              | 474 |
| XP_003384679.1[A.queenslandica] | LPVATILARNVAVFAGSLAVLFTLTIVIQEDLLTAHNILTAITGLGVIVTLCRIFIPNEH                                                                             | 427 |
| XP_012564588.1[H.vulgaris]      | SPITITIAKNIATFFSGAILAVLLGLSFYDKDLTAHVLFSFMATLGIIKICSGFIPDEH                                                                              | 416 |
| XP_032240258.1[N.vectensis]     | SPFLAIIAKNVAFLAGAVFVLTITFTLVDRDVLMAEHMLAVIAGLILIRGCVYIPNEN                                                                               | 417 |
| XP_019613418.1[B.belcheri]      | SHVMTLIARHVAFLAGAFVAVLVLTITIEDVLTIEHVLTITITLGMVLVAGCRALIPDEN                                                                             | 425 |
| XP_032801920.1[P.marinus]       | APMMAVLAKNVTFVAGSLAVLALITVYDEVDVLSVEHVLTAITAGLVLTIVCRAPIPDEH                                                                             | 426 |
| XP_014005943.1[S.salar]         | SPLLTVVAKNVAFVAGSLAVLALITVYDEVDVLAHEHVLSSITLGVCTIVCRSFIPDKH                                                                              | 426 |
| XP_018094208.1[X.laevis]        | SPLLAVVAKHFGFLAGSILAVLIALTVYDEVDVLAHEHVLSAVTLGIVVTICRSFIPDQH                                                                             | 427 |
| NP_001029993.2[G.gallus]        | SPLLTIVAKNVAFVAGSILAVLIALTVYDEVDVLAHEHVLTTVTLLGVGTIVCRSFIPDQH                                                                            | 429 |
| NP_001003917.2[M.musculus]      | SPLLTLLAKNGAFFAGSILAVLIALTVYDEVDVLAHEHVLTTVTLLGVGTIVCRSFIPDQH                                                                            | 429 |
| NP_001070666.1[H.sapiens]       | SPLLTLLAKNGAFFAGSILAVLIALTVYDEVDVLAHEHVLTTVTLLGVGTIVCRSFIPDQH                                                                            | 429 |
| NP_001127287.1[P.abelii]        | SPLLTLLAKNGAFFAGSILAVLIALTVYDEVDVLAHEHVLTTVTLLGVGTIVCRSFIPDQH<br>. : : * : : * . : * : : : : . : . : : : : : : : : * * : : * : : * : : : | 429 |
| NP_611114.1[D.melanogaster]     | LVMWCEQLMTAILAHVHYLPSEWRQAHTTKVRQEFSNFFQFKAGYLLSEIFSPFVTPFV                                                                              | 534 |
| XP_003384679.1[A.queenslandica] | QTRDPKELMTEILEEIHYPMDLWKEKPHTVQVSSQFSQVQFQLTIAYLIDELLSPLVTPFI                                                                            | 487 |
| XP_012564588.1[H.vulgaris]      | MVFCPETLMKQILSNTHYIPEEWKGRAHTEMEVREEFSKMFQYKFCILLEELMSPLLTPFI                                                                            | 476 |
| XP_032240258.1[N.vectensis]     | LVMWCEQLMRQLLSYTHYIPEEWKGRAHTEMEVREEFSKMFQYKFCILLEELMSPLLTPFI                                                                            | 477 |
| XP_019613418.1[B.belcheri]      | MVFCPEQLMVCILAIHYMPDRWKQAHTYRVRDEFSQFLQYKAVFILLEELSPITPLI                                                                                | 485 |
| XP_032801920.1[P.marinus]       | LVMWCEQLLQAVLAHIHYMPEHWKGAHKTETRDEFSQFLQYKAAFIEMEELSPITTPFI                                                                              | 486 |
| XP_014005943.1[S.salar]         | LVYCEQLLRVILAHYHMPDHWQGNNAHRYETRDQFSQFLQYKAVFILEELISPLVTPFI                                                                              | 486 |
| XP_018094208.1[X.laevis]        | LVFCEQLLRVILAHYHMPDHWQGNNAHRYETRDQFSQFLQYKAVFILEELISPLVTPFI                                                                              | 487 |
| NP_001029993.2[G.gallus]        | LVFCEQLLRVILAHYHMPDHWQGNNAHRYETRDQFSQFLQYKAVFILEELISPLVTPFI                                                                              | 489 |
| NP_001003917.2[M.musculus]      | MVFCPEQLLRVILAHYHMPDHWQGNNAHRSQTRDEFAQLFQYKAVFILEELISPIVTPFI                                                                             | 489 |
| NP_001070666.1[H.sapiens]       | MVFCPEQLLRVILAHYHMPDHWQGNNAHRSQTRDEFAQLFQYKAVFILEELISPIVTPFI                                                                             | 489 |
| NP_001127287.1[P.abelii]        | MVFCPEQLLRVILAHYHMPDHWQGNNAHRSQTRDEFAQLFQYKAVFILEELISPIVTPFI<br>. : * : : * : : * : : * : : * : : * : : * : : * : : * : : * : : * : : *  | 489 |
| NP_611114.1[D.melanogaster]     | LIFVFRPKAIELVRRFRTFTVSVRGVGNVCSFAQMDVRKHGPNPDWQLTSELEEMTRATAQ                                                                            | 594 |
| XP_003384679.1[A.queenslandica] | LYFSLRNRKSQDIIDFLRNFTIDVSGVGDVCSFAEMNLRRKHGSEWQQNSQLARSTDY---                                                                            | 544 |
| XP_012564588.1[H.vulgaris]      | LCFGLRYKALQIVDFYRNFTVEVAGLGDVCSFAQMDIRKHGAKNWSDEG-CSKEDQML---                                                                            | 533 |
| XP_032240258.1[N.vectensis]     | LCFSLRYKALDIVDFYRNFTVDVVGVDVCSFAQMDVKKHGNPEWLSEG-LSEATQY---                                                                              | 533 |
| XP_019613418.1[B.belcheri]      | LIFSLRSKALDIVDFRNFTVDVVGVDVCSFAQMDIKRHGNPQWTGEKQQTIDVSQY---                                                                              | 542 |
| XP_032801920.1[P.marinus]       | LIFGVRPKALEIVDFRNFTVEVVGVDVCSFAQMDIRRHGNPTWMSAG-QTEASYY---                                                                               | 542 |
| XP_014005943.1[S.salar]         | LIFSLRRKSLEIIDFRNFTVEVVGVDGTCFAQMDIRQHGHPAWMSAG-QTEASYY---                                                                               | 542 |
| XP_018094208.1[X.laevis]        | LIFCLRPKSLEIIDFRNFTVEVVGVDGTCFAQMDVRQHGNPAWMSAG-QTEASYY---                                                                               | 543 |
| NP_001029993.2[G.gallus]        | LIICLRPKSLDIVDFRNFTVEVVGVDGTCFAQMDVRQHGHPAWMSAG-QTEASYY---                                                                               | 545 |
| NP_001003917.2[M.musculus]      | LIFCLRPRALEIIDFRNFTVEVVGVDGTCFAQMDVRQHGHPPQLWSGG-QTEASVY---                                                                              | 545 |
| NP_001070666.1[H.sapiens]       | LIFCLRPRALEIIDFRNFTVEVVGVDGTCFAQMDVRQHGHPPQLWSAG-QTEASVY---                                                                              | 545 |
| NP_001127287.1[P.abelii]        | LIFCLRPRALEIIDFRNFTVEVVGVDGTCFAQMDVRQHGHPPQLWSAG-QTEASVY---<br>* : . * : : : * * . : : * * : : * : : * : : * : : * : : *                 | 545 |
| NP_611114.1[D.melanogaster]     | QPQQEPQQQSLAGGKTEMSLLRFTLNNPEWQMPKEAKQFLRGVREHAGVELVQAKTSM--                                                                             | 652 |
| XP_003384679.1[A.queenslandica] | -----ERSELGKTEISLLNFTQKNPNWEAGEDADTFLTLQKESVEELHSSQQQQQQQ                                                                                | 596 |
| XP_012564588.1[H.vulgaris]      | -----SAESQAENAKTELSLLNFSIKNPDKPSSHGKQFIDTIKEQAFQESLSHSLSSNQ                                                                              | 588 |
| XP_032240258.1[N.vectensis]     | -----EQAEDGKTELSLLHFSIRNPAWKPSDRGAHFISTIKENAIHEGLNIAGSVTL                                                                                | 585 |
| XP_019613418.1[B.belcheri]      | -----HQAEDGKTELSLMHFTLTNTPTWQPPRHCKNFINHLKEQAQHKDVNML---NSA                                                                              | 591 |
| XP_032801920.1[P.marinus]       | -----QQAEDGKTELSLVHFAITSNPRWRPPRGSNVYLNQLREQVQRDSTAN                                                                                     | 588 |
| XP_014005943.1[S.salar]         | -----QQAEDGKTELSLMHFAITNPQWQPPTETTHFISQLKERVQREATGDRHT---                                                                                | 591 |
| XP_018094208.1[X.laevis]        | -----QQAEDGKTELSLMHFAITNPRWQPPRECSAFLSQLRERVQRDSTMGNQKHTP                                                                                | 595 |
| NP_001029993.2[G.gallus]        | -----QQAEDGKTELSLMHFAITNPKWQPPRESTAFIGFLKERVHRDSS-VALAQGA                                                                                | 596 |
| NP_001003917.2[M.musculus]      | -----QQAEDGKTELSLMHFAITNPGWQPPRESTAFLGFLKEQVQRDGAAGLAQGG                                                                                 | 597 |
| NP_001070666.1[H.sapiens]       | -----QQAEDGKTELSLMHFAITNPGWQPPRESTAFLGFLKEQVQRDGAAGLAQGG                                                                                 | 597 |
| NP_001127287.1[P.abelii]        | -----QQAEDGKTELSLMHFAITNPGWQPPRESTAFLGFLKEQVQRDGAAGLAQGG<br>* : : * : : * : : * : : * : : * : : * : : * : : * : : *                      | 597 |
| NP_611114.1[D.melanogaster]     | -VQENP----LTNSLISFGTMGADYCSIANSVL----TAQVTPQQLSISQSLRPLGLPV                                                                              | 702 |
| XP_003384679.1[A.queenslandica] | SLT-----LSREDSPPPLSLSSHQF-GVSRLQGSMD---DTSIWA-----S                                                                                      | 632 |
| XP_012564588.1[H.vulgaris]      | -TPFNAGTSFDTNFIQLQSIAYPAL-----                                                                                                           | 613 |
| XP_032240258.1[N.vectensis]     | -S--EPCSLQDFRSFDCPLGPLYEPFAMA-----                                                                                                       | 610 |
| XP_019613418.1[B.belcheri]      | VMVDNP----FFQSLQSLSSAGYPSMMLTSLMVGR-----GPDATLVP-----PR                                                                                  | 632 |
| XP_032801920.1[P.marinus]       | --PQPL----LFSSLTQTIETSGSGPYGLLSGMLGSPSLTAYRSTRDATCSL-----PE                                                                              | 635 |

|                                 |                                                                |     |
|---------------------------------|----------------------------------------------------------------|-----|
| XP_014005943.1[S.salar]         | -----LTSLSGSEPRSLIANFLAGPPSLASLHLGRDGLTN-----HG                | 629 |
| XP_018094208.1[X.laevis]        | GL-MQP---LQCSGLSIQSDPEPHSLMANMFSGVST-AGFPANTEALGSP-----HV      | 642 |
| NP_001029993.2[G.gallus]        | VLPENA----LFSSQSLQSESEPHSLIANVAGSSV-LGFHMGRDGGQASR-----HL      | 644 |
| NP_001003917.2[M.musculus]      | LLPENNA----LFTSIQSLQSESEPLSLIANVVAGSSC-RGPPLSRDLQGSR-----HR    | 645 |
| NP_001070666.1[H.sapiens]       | LLPENNA----LFTSIQSLQSESEPLSLIANVVAGSSC-RGPPLPRDLQGSR-----HR    | 645 |
| NP_001127287.1[P.abelii]        | LLPENNA----LFTSIQSLQSESEPLSLIANVVAGSSC-RGPPLPRDLQGSR-----HR    | 645 |
|                                 |                                                                |     |
| NP_611114.1[D.melanogaster]     | SGGFVPAASDFRQMLQONLSASVGPLDSMRRLRLSRA-----EGRLEGPTD            | 748 |
| XP_003384679.1[A.queenslandica] | FTSANDEASSLTPLKLHVHD-----VMKT-----SHGQSSSSAAPPPI               | 674 |
| XP_012564588.1[H.vulgaris]      | -----DPAI                                                      | 617 |
| XP_032240258.1[N.vectensis]     | -----TSDPTA                                                    | 616 |
| XP_019613418.1[B.belcheri]      | DPGTGT-----EPSQFG-----VALPGTTAPGRYGLVRGDISSVEGPIQAPNT          | 675 |
| XP_032801920.1[P.marinus]       | MSAATAAATAMLSLMPSPASLTGPREELAEMPDS-TPGNITVT-----ARPGFS         | 685 |
| XP_014005943.1[S.salar]         | PVGVS DGASALRSLSISSMRGSC-----SS-----AHRS---                    | 658 |
| XP_018094208.1[X.laevis]        | -SAVSEVASALHSLSPQQSCHPV-----                                   | 664 |
| NP_001029993.2[G.gallus]        | -SE---VASALRSFSPLQSAQP-----SGGFQTA-----GRDG---                 | 674 |
| NP_001003917.2[M.musculus]      | -AD---VASALRSFSPLQPGAAP-----QG-----                            | 666 |
| NP_001070666.1[H.sapiens]       | -AE---VASALRSFSPLQPGQAP-----TG-----                            | 666 |
| NP_001127287.1[P.abelii]        | -AE---VASALRSFSPLQPGQAP-----TG-----                            | 666 |
|                                 |                                                                |     |
| NP_611114.1[D.melanogaster]     | TLLYG-----LCGVDP-----VGSTPLNVGVADMCLSLALYLHEL                  | 783 |
| XP_003384679.1[A.queenslandica] | GSIVPSYHPP-----PPQPQEVAL-----TVYDHCL                           | 700 |
| XP_012564588.1[H.vulgaris]      | -----M-----VSRNDVLRNSIMYLHEV                                   | 636 |
| XP_032240258.1[N.vectensis]     | GLQGGVKAADTRRSR-----EQHTEALMNTSMLYMHLE                         | 649 |
| XP_019613418.1[B.belcheri]      | GLLGSSMAPRGTAISHTLPP---TPE---PVS LQETMAPTELMAAEMSFSALYMHQL     | 728 |
| XP_032801920.1[P.marinus]       | GAVGMSMSTGGRGKVSFGGTDFRSSSVGSSFRGEPQSQSSILSEFASAEMLHAIYMHEA    | 745 |
| XP_014005943.1[S.salar]         | -----AGHASSASRAMPGSSSTDARTASSGSSVWEGQLTSLVLSEYASTEMSVHALYIHEL  | 713 |
| XP_018094208.1[X.laevis]        | -----QSQSGISADFRNGSFGSNVWEGPMNSGTLSEYASTEMSLHALYMHLE           | 711 |
| NP_001029993.2[G.gallus]        | -----EGTQPRGSSAMTASGADARTMSSGSSAWEGQLQSMILSEYASTEMSLHALYMHLE   | 729 |
| NP_001003917.2[M.musculus]      | -----RVPSTMTGSGVDARTASSGSSVWEGQLQSLVLSEYASTEMSLHALYMHQL        | 716 |
| NP_001070666.1[H.sapiens]       | -----RAHSTMTGSGVDARTASSGSSVWEGQLQSLVLSEYASTEMSLHALYMHQL        | 716 |
| NP_001127287.1[P.abelii]        | -----RAHSTMTGSGVDARTASSGSSVWEGQLQSLVLSEYASTEMSLHALYMHQL        | 716 |
|                                 | : * *                                                          |     |
|                                 |                                                                |     |
| NP_611114.1[D.melanogaster]     | NQKKRQARQS----RIDEAEDERPGTSHWPPRPPAAPSADT----GFG-----SRHTV     | 828 |
| XP_003384679.1[A.queenslandica] | PSDSSLSSAD-----IRLE-----STIGHTP                                | 721 |
| XP_012564588.1[H.vulgaris]      | QNRRIISVTSLSKSSYGDNFENS DLRTWPSATSGQTSFGVNKENLLP----RYSAMKNP   | 692 |
| XP_032240258.1[N.vectensis]     | HSRQADHSMH-----EVSYPSPGSPSTQSPRRPETSGLFEETGLTYQAREQT           | 694 |
| XP_019613418.1[B.belcheri]      | HQTQTHHDHSD-----QEAQRAWRQPLPPAFYGTTPMA-----NQQRPS              | 768 |
| XP_032801920.1[P.marinus]       | RRNYATSDAQ-----ARYHWQPPENNGDDDTMDEVNALS GFRESSQLHNT            | 791 |
| XP_014005943.1[S.salar]         | HKQQS GGE-L-----SRHTWHRQDSDDSDSVTEEGSGGG---NNPNRP              | 755 |
| XP_018094208.1[X.laevis]        | HQQHTRMA-P-----GRHIWHRQESDESGESSQGEGLINTT---SNV---P            | 750 |
| NP_001029993.2[G.gallus]        | HKQHAQLE-P-----ERHTWHRRESDESGESTHEELDAQRG---APV---P            | 768 |
| NP_001003917.2[M.musculus]      | HKQQQAQAE-P-----ERHVWHRRESDESGESAPDEEGEGAR---APQ---P           | 755 |
| NP_001070666.1[H.sapiens]       | HKQQQAQAE-P-----ERHVWHRRESDESGESAPDEEGEGAR---APQ---S           | 755 |
| NP_001127287.1[P.abelii]        | HKQQQAQAE-P-----ERHLWHRRESDESGESAPDEEGEGAR---APQ---S           | 755 |
|                                 |                                                                |     |
| NP_611114.1[D.melanogaster]     | ITSKAAESTPLLSIRS-----                                          | 845 |
| XP_003384679.1[A.queenslandica] | SSTAG-----GLTEPFLPRDSEP-----                                   | 739 |
| XP_012564588.1[H.vulgaris]      | A-----DRL-----                                                 | 697 |
| XP_032240258.1[N.vectensis]     | F-----EQEMTYMARSH---GPEVAFHPGLSGQLG-----                       | 721 |
| XP_019613418.1[B.belcheri]      | GSVEDSR-----TSEPGQWHSVGS-----TTMPGIDEAPSEETDTL                 | 804 |
| XP_032801920.1[P.marinus]       | GSNSGSHSSSVLGSGQRETYVSPSASIGHSGDYMPNIGSLQDTHGDSLGLMTRENTL      | 851 |
| XP_014005943.1[S.salar]         | I-----PRSHTFPISTP-ITPGPIPSNSGP-----NPDRTTPGQDVTP               | 796 |
| XP_018094208.1[X.laevis]        | S-----SL--SCPSP-AAA-----VWE-ERL                                | 767 |
| NP_001029993.2[G.gallus]        | L-----PRASYPFSSR-QPA-----EETATL                                | 789 |
| NP_001003917.2[M.musculus]      | I-----PRASYPCATP-RPG-----APETTAL                               | 777 |
| NP_001070666.1[H.sapiens]       | I-----PRASYPCAAP-RPG-----APETTAL                               | 777 |
| NP_001127287.1[P.abelii]        | I-----PRASYPCAAP-RPG-----APETTAL                               | 777 |
|                                 |                                                                |     |
| NP_611114.1[D.melanogaster]     | -----                                                          | 845 |
| XP_003384679.1[A.queenslandica] | -----P                                                         | 740 |
| XP_012564588.1[H.vulgaris]      | -----                                                          | 697 |
| XP_032240258.1[N.vectensis]     | -----RVEEGSQ-----A---LHSTSPTAGNSSSQTN                          | 745 |
| XP_019613418.1[B.belcheri]      | SYS-----P                                                      | 808 |
| XP_032801920.1[P.marinus]       | GAFPFRRHYGGTSASENMLQPEGSPFRFLMPGGWQEDMAGLTID---PHGGVPSM-S      | 907 |
| XP_014005943.1[S.salar]         | QSNSQRRYGGNTD---SVGPEGRVVR SARVPMGGWAE EGRG-GRHPDTPVEEGSEDDM-P | 851 |
| XP_018094208.1[X.laevis]        | PPLSTHRLSASTD---LGSVQR--TSLARQPMGGWSEDEVQP-SRLPEVPVEEGSEDEL-P  | 820 |
| NP_001029993.2[G.gallus]        | QTGFQRRYGGITD---PGTVHRAPSHFSRLPLGGWAEDGQS-ARHPEVPVEEGSEDEL-P   | 844 |
| NP_001003917.2[M.musculus]      | HGGFQRRYGGITD---PGTVPRGSPSHFSRLPLGGWAEDGQPASRHPEVPVEEGSEDEL-P  | 833 |
| NP_001070666.1[H.sapiens]       | HGGFQRRYGGITD---PGTVPRVPSHFSRLPLGGWAEDGQSASRHPEVPVEEGSEDEL-P   | 833 |
| NP_001127287.1[P.abelii]        | HGGFQRRYGGITD---PGTVPRAPSHFSRLPLGGWAEDGQSASRHPEVPVEEGSEDEL-P   | 833 |
|                                 |                                                                |     |
| NP_611114.1[D.melanogaster]     | -----                                                          | 845 |
| XP_003384679.1[A.queenslandica] | PQT-----                                                       | 743 |
| XP_012564588.1[H.vulgaris]      | -----                                                          | 697 |

|                             |                      |     |
|-----------------------------|----------------------|-----|
| XP_032240258.1[N.vectensis] | EQRRDRDQETMVNF-----  | 758 |
| XP_019613418.1[B.belcheri]  | PNV-----             | 811 |
| XP_032801920.1[P.marinus]   | PNPQQINEVAYTFHSLFLNT | 927 |
| XP_014005943.1[S.salar]     | PN---IHKVT-----      | 858 |
| XP_018094208.1[X.laevis]    | PQ---VQKV-----       | 826 |
| NP_001029993.2[G.gallus]    | PQ---IHKV-----       | 850 |
| NP_001003917.2[M.musculus]  | PQ---VHKV-----       | 839 |
| NP_001070666.1[H.sapiens]   | PQ---VHKV-----       | 839 |
| NP_001127287.1[P.abelii]    | PQ---VHKV-----       | 839 |
