# Supplementary material for: An Evolutionary Perspective on the Origin, Conservation and Binding Partner Acquisition of Tankyrases
Source: MDPI journal article supplement (doi:10.3390/biom12111688), 2022-11-15
Supplement: s1 [file s1]

# PARP4

## Sequences :

>NP\_006428.2 protein mono-ADP-ribosyltransferase PARP4 [Homo sapiens]  
MVMGIFANCIFCLKVKVLPQOQKKKLQTDIKENGKGKFSFSLNPQCTHILNDADVLSQYQLNSIQKNHVH  
IANPDIWKSIREKRLLDVKNYDPYKPLDITPPDQKASSSEVKTEGLCPDSATEEDTVELTEFGQNV  
EIPHLPDQDFEVAKYNTLEKVGMEGGQEAUVVLEQCSRSDRCFFLISSHFLLDGGMTRRQFAIKKTS  
ASEYFENYIEELKKQGFLRREHFTPEATQLASEQLQALLLEEVMNSSTLSQEVSDLVEMIMAEALGHLEH  
MLLKPVNRISLNDVSKAEGILLVKAALNGETAEQLQKMTEFYRLIPHKGTMPEKVNGLGLAKKADLC  
QLIRDMNVNVCETNLSKPNPFLAKYRALRCKIEHVEQNTTEFLRVKKEVLQNHHSKSPVDVLQIFRVGRV  
NETTEFLSKLGNVRPLLHGSPVQNIIVGILCRGLLLPKVVEDRGVQRTDVGNLGSgiYFSDSLSTSIKYSH  
PGETDGTLLLCDVALGKCMDLHEKDFSLTEAPPGYDSVHGVSQTASVTTDFEDDEFVYKTNQVKMKY  
IIKFSMFGQIKDFHPSDHTLEEYRPEFSNFSKVEDYQLPDAKTSSTKAGLQDASGNLVPLEDVHIK  
RIIDTVAQVIVFQTYTNKSHVPTEAKYIFPLDDKAAVCGFEAFINGKHIIVGEIKEKEEAQQEYLEAVTQG  
HGAYLMSQADPVDVTVSGNLPKPAKVLIKITYITELSLGTVGVFMPATVAPWQQDKALNENLQD  
TVEIKICKEIGTKQSFSLTMSIEMPVYIELFSDTHELKQKRTDCKAVISTMEGSSLDSSGFSLHIGLSAAYL  
PRMWVEKHPEKESEACMLVFQPDLDVLPDLASESEVILCLDCSSSMEGVTFLLQAKQIALHALSLVGEKQ  
KVNIIQFGTGYKELFSYPKHIITNTMAAEFIMSATPTMGNTDFWKTLRYLSLLYPARGSRNILLVSDGHL  
QDESILTQLVKRSRPHTRLFACGIGSTANRHLRLILSQCGAGVFEYFNAKSKHSWRKQIEDQMTRLCPS  
TCHSVSVWQQLNPDVPEALQAPAQVPSLFRNDRLLVYGFIPHCTQATLCALIQEKEFRCTMVSTTELQKTT  
GTMIHKLAARALIRDYEDGILHENETSHEMKKQTLKSLIIKLKSNLSLTQFTSFVAVEKRDENESFP  
IPKVSLLIAKEDVDVFLPYMSWQGEPOGAIVNRQSLASSEWPELRLSKRKHKKIPFSKRMKELSQPEV  
SEDFEEDGLGVLPAPTSNLERGGVEKLLDLSWTESCKPTATEPLFKKVS PWETSTSSFFPIALAPVGSYLPPT  
ARAHSPASLSFASYRQVASFSGAAPPQGFDAQSQGVPGTCADWIPQASACPTGPPQNPPSPCYGIV  
FSGSLSASQASAPLQHPGGFTTRPSAGTFPELDSQPLHFSLPTDPIRGFGSYHPSASSPHFGPSAAS  
LTANLRLPMASALPEALCSQSRTTPVDLLCEESVGSLEGSRCPVFAFGSDTESDELSEVLQDS  
CFLQIKCOTDKDLSILCFLEVKEEDEIVCIQHWDAPVWTELLSLQTEDGFWKLTPELGLILNLTNGLHSLFKQK  
GIGSLGKVGRECLLDLIATMLVLQFIRTRLEKEGIVFKSLMKMDASISRNIPWAFEAIKQASEWVRRT  
EQYPSICPRLELGNWDSATKQLLGLQPISTVSPLHRVLHYSQG

>NP\_001125927.1 protein mono-ADP-ribosyltransferase PARP4 [Pongo abelii]  
MMMGIFANCIFCLKVKVLPQOQKKKLQTDIKENGKGKFSFSLNPQCTHILNDADVLSQYQLNSIQKNHVH  
IANPDIWESVREKRLLDVKNYDPYKPLDIIPPDQKSPSEVKTEGLCPDSATEQEDTVELTEFGQNV  
EIPHLPDQDFEVAKYNTLEKVGMEGGQEAUVVLEQCSRSDRCFFLISSHFLLDGGMTRRQFAIKKTS  
ASEYFENYIEELKKQGFLRREHFTPEATQLASEQLQALLLEEVMNSSTLSQKVS  
DLVEMIMAEALGHLEHMLLKPVNRISLNDVSKAEGILLVKAALNGETAEQLQKMMAEFYRLIPHKGTTMPKEVNGLGLAKKADLC  
QLIRDMNVNVCETNLSKSPSPFLAKYQALRCKIEHVEQNTTEFLRVKKEVLQNHHSKSPVDVLQIFRVGRV  
NETTEFLSKLGNVRPLLHGSPVRNIIVGILCRGLLLPKVVEDHGVQRTDVGNLGSgiYFSDSLSTSIKYSH  
PGETDGTLLLCDVALGKCMDLHKKDFSLTEAPPGYDSVHGVSQTASVTTDFEDDEFVYKTNQVKMKY  
IIKFSMFGQIKDFHPSDHTLEEYRPEFSNFSKVEDYQLPDAKTSSTKAGLQDASGNLVPLEDVHIK  
RIIDTVAQVIVFQTYTNKSHVPTEAKYIFPLDDKAAVCGFEAFINGKHIIVGEIKEKEEAQQEYREAVTQG  
HGAYLMSQADPVDVTVSGNLPKPAKVLIKIAYITELSLGTVGVFMPATVAPWQQDKALNENLQD  
TVEIKICKEIGTKQSFSLTMSIEMPVYIELFSDTHELKQKRTDCKAVISTMEGSSLDSSGFSLHIGLSAAYL  
PRMWVEKHPEKESEACMLVFQPDLDVLPDLANESEVILCLDCSSSMEGVTFLLQAKQIALHALSLVGEKQ  
KVNIIQFGTGYKELFSYPKHIITNTMAAEFIMSATPTMGNTDFWKTLRYLSLLYPARGSRNILLVSDGHL  
QDESILTQLVKRSRPHTRLFACGIGSTANRHLRLILSQCGAGVFEYFNAKSKHSWRKQIEDQMTRLCPS  
TCHSVSVWQQLNPDGPEALQAPAQVPSLFRNDRLLVYGFIPHCTQATLCALIQEKEFRCTMVSTTELQKTT  
GTMIHKLAARALIRDYEDGILHENETSHEMKKQTLKSLIIKLKSNLSLTQFTSFVAVEKRDENESFP  
IPKVSLLIAKEDVDVFLPYMSWQGEPOGAIVNRQSLASSEWQKLYSSKPKLAKRKKKLSQPEVSEDFEED  
GLGVLPAPTSNLERGGVEKLSDLWTESCKPTATEPLFKKVS PWETSTSSLFVGSPPVVGSLYRPTAHAP  
RAASMPFASYCQAASFSGAAPPQGFDAQPQSPAPGSCADWIPQASACPTGPPQNLSFAPFCGIAFSGS  
SLSPQTLPFPQFPFGGCTTRPSAGTSPELDSQPLLFSLPTDPIRGFGSYHLSASSPHFGPSAASLTAN  
LRLPIASALPEALCSQSQTTPVDLLCQESVGSLEGSRCPVFVRSSDTESEDELSEVLQDSRI  
LKICOTDKDIPCFLEVI EDEIVCTQHWDAPVWTELLSLQTEDGFWKLTPELGLILNLTNGLHSLFKQKIGS  
LGIGRERLLDLIATMLVLQFIRTRLEKEGIVFKSLMKMDPSISRNIPWAFEAIKKASEWVRRT  
EQYPSICPRLELGDWDSATKQLLGLQPVNTVSPLHRVLHYSQG

>EDL36193.1 mCG130836, isoform C\_a [Mus musculus]  
MTLGI FANCIFCLKVKVLPQOQKKKLQTDIKENGKGKFSFLNPQCTHIVIVDSADVLSRCHLSIQKNDVQ  
IANPAFIQDSVQRRLLDVKNYDPLSPAPAAPPAERSRSEVQSEYLPDNTPEKENTEVTEVSAENVEIP  
PFIQDFEVVKYNIILEKVGGPETVVVELQSSQDPESC  
PFVITAHFLADQKTRESTGKQTEGAEIYYES  
YVEDLKQGGFLQEHFTAEATQLASEKLQALLLEEIVSSGALSQEVSDLLEVIWTEALGHLENTLLKPVN  
MSLNDVSKAEGILLVKTALKNGDSPGLQKTMAEFYRLIPHRHPASEEVRNRLLLAQKEDLCQLVRDMV  
NVCETNLSKPNPFLAKYRALRCKIEHVDQNTTEFSRVKKEVLQNNRSEQPV  
DILQIFRVGRVNEATEFLSKLGNVRLLFHHGSPVRNIIIGILSRGLLLPKVAEDRGVQRTDVGNLGSgiYFSDSLSTSIKYAHAGETDGS  
RLLVCCDVALGKCVNLFFKDFSLTEAPPGYDSVHGVSSETTSVP  
TFDQDEFFVYKTNQVKMKYIVKFC  
TPEGDIKEPHPHENTEEVEQRAEPSSVPEAGDFQLPDIKPFPTNIKAGLQDASANPVPLDSVHIKGRVDFVA  
QVIVFQTYTNQSHVPTEAKYIFPLDDKAAVCGFEAFINGKHIIVGEIKEKEEARQEYREAVSQGHGAYLMD  
QDTPDVTTVSGNLPFRRAKVLIKITYITELSIQSPVAIFFIPGTVAPWQQDKALNENLQD  
TVEIRIKEI GAEQSFSLAMSIEMPYMEIETSSDTHELRKQSTDCKAVSTVEGSSLDSSGFSLHIGLRDAYLPRMWVEK  
HPEKESEACMLVFQPELADVLPDLRGKNEVILCLDCSSSMEGVTFLLQAKQVALYALSLLGEEQKVNIMQF  
GTGYKELFSYPKCIITDSKMATEFIMSAAPSMGNTDFWKVRLYLSLLYSEGFNRILLISDGHLQSES  
LTLQLVKRNIQHTRVFTCAVGSTANRHLRLILSQCGAGVFEYFNSKSKHSWKKQIEAQMTIRIRSPCHSVSVK  
WQQLSRDAPEPLQAPAMVPSLFRNDRLLVYGFIPHCTQATLQAFIQEKEFRCTMVSTTELQKTTGTMIHKL  
AARALIRDYEDGILHDETNEHEMKNMKSLIELKSNLSLTQFTSFVAVEKRDVNEIPFANVPNIS  
SELVAKEDVDVFLPYMSWQGEQPEASISQTEIDSSRLKHNLSDGHGVLQLSHSPNLSEIPTIHSEPEPLLP  
KDLCSRDMGFSCGTAFGSFASSKDFDPGKFSQGPNNISFSPKAPMGVHLQSPFCSPKPPSAPPLVTN  
VILCSSEAPQSYFLNLQSAAVHQSPNNRVSEIIMESVLESSLPSDYSSRDASSYLALGAEDSLLGSSS  
FETDTEAAATPANDLLTSIETSSDEEACFDEQESPVWASLFA  
LQTENGFWKLTPELGLILNLTNGLHSLFKQKIGS  
LLEEKGIRSLGTGKERLLDLIATMLVLQFLYTKLEQGMVAKSLIKMDDAFISRNIPWAFENIKKAREWA  
RKTEGQYPSICQRLGLGDWESATKQLLGIQPAQNTSLHRLIYYSGQ

>XP\_046764289.1 protein mono-ADP-ribosyltransferase PARP4 isoform X1 [Gallus gallus]  
MTIFANCVFFIKLKYSSIQKNSLKACIEENGGAIDFVLNNKCTHVLVDNANVLSHHNLKITQKYQLPVL  
YADFPVMSVENGKLLVTDAFEVNTSQGNISNQWPGGHGLEDLSSENKIATNQNESNDSNLTVIGESDKR  
IEFPKVGTLRPHSENASVPQDFEVAKYNVLEKINSKGSKDFVIELHCSQEYELFRLCAHFSASNGTK  
KDKQFPI NKTADEIRENYDILVANLKSQDFLLRETFFPEAECLASTKLQKLLLEESINSSAICQEVSD  
FVLEIWAELAGHLDSLLLESVNNISLNDVSKAEGILLQVKNALNEGANE  
TALQEMMEFYQLIRHKTEIDYE VTKRLLSRQDLQLMRMDLNI  
RETSMSCPNPSSLAKYQALRCKIDAVDPMSDEFLQVERQVLKNYNGC  
SVRIILQVYIRIGRVSETAEFLGLSGNVRSLFHASSVRNMGILSRGLLMPKVVVEDHGVERTD  
TGNLGSgiYFSDYSASVYSSPSEMDGTRLLAVCDVALGSCDLDERDFS  
LNAAPSGYNSVHGVRKATADVSSDFEDDEFVYKTTQVKIRIVVKFLCAEDQIKQFP  
GTEVEIEQDNTPESQCHLQNESYELPSRANISDTVTKTGLQ  
DRVGNVPLESVHIKARIDFVAQVMFQTYTNQNSPTEAKVFPFLDDKAAVCGFEAFVGRHIIIGQK  
EKKQAHREYKAIISEGDAYLMQDADPIVITVGNICFNSYLIKITYITELSLCNGCITFFHMPASV  
SPWQDKALNENTQDTTIKKICVQKQVETLKKFSLDMSIEMPYSIESIHSWTHKLKIKTECKAVIKTVENS  
SLDSSGFGDLWISHAYLPRMWVEKHPNKNSEACMLVFQPEFAAFDEEQLSSEIIILLDCSNMAGS  
ALLQAKQIALHALKQFSRRQNVNLIKFGTGNFSEFSSFSKNTSKDLASL  
TEPTSATATMGNTDLMKTLRYLSLLFPQSGHRNILLISDGHLQNESVTFQLVKNVHHTRL  
TECGVSTANRHLRLSLSQYGAGAFEYFDSKSKYNWEAKIQNVQSRIFSPGCS  
SVSIKWOQFDINAPKPMQAPAIQSLFTNERLLVYGVPHCTQATLRAILIN  
DQELQTVVSTTELQKTTGTVTLHKLTARAFIRDYEDGILHENETHEHEMKQILKNMI  
IHLSMENSIITQFTSFIAIEKRKDANEICSANVPNILEIIAQEDVDVFLPYM  
NWEQKPMGSGTLFSGEPIGPPFDVALQSDAQS DCTFTKRC  
TEGLQLQPEDLTVTKESIQSEVIPQDYGFHDDDIATVKFAAAMPFVCKP  
PFVMSYCNTAPLFGSAGAAVMTQKNSFPTPALASSGAHLRLCGSPVYSPSP  
PLVGMKYDNSFVDHINPTIMFGSCASTYSSDKTNAEKQVTHNSPV  
PQHHKTKLKAKYRKMVTLGLQDATASEQFERPKRLLQSPCFITTEKERSQ  
QKLELTPVMWEEIFDLQNGQSGWNLSPLQGLKILKFDVYLIINHFLIRNGI  
QSLGKGEKLLKLIATMLVLQFIRCANELQGVFKSLMKLDNLTSSG  
VHWAFFESIKKATEWVKRVEGQFPFICYRLELGDWDSATKMLG  
IKCN

>XP\_041440458.1 protein mono-ADP-ribosyltransferase PARP4 isoform X2 [Xenopus laevis]  
MTVALFSDCVFFLKINDLSFKERKALKSTITSNNGVSI FSVLNQKCTHVVVNTIAFLSASQLKTVQKHQIQ  
IVDSHF1WKCLEEKCLILDYQYLTAGVTPSEKEPQSQWADPEKTVF PENVPTLQNKDELWDRDYSEFDS  
TFTDPPTDEVAKYSFFHKGSNVAFLELLCFPESSSFLFKISKVICSNGAEPDSSSQFANTAEASCQKYE  
KCTEALKEQGFKRVKRIPPKVALLTSEALQKVLEEA1NATKLSPVVGYFVESVWTEALGHDKILSRPV  
NSISLNDVSKAEGILLQVRKALDTGTPEGDISKAMAEFYRLIPHKKPMLVNIINKLLSTKQDLCLQILRDM  
VSVCTENLSKNPFSILAKQALRCQIEHVESDTEEFHQVVSQQIRENKHCEESIKLKI FRVGKLSEATGF  
QNLGNVKSLLHSAHSPHFVGLSKGILLPKNVEDDLGERTDIGNLGSQIYFSDSISTGVKYSEPSVTN  
GARLLLVCDVALGNCKDLKYKDRFSLTEAPNGDFS VHGVRQVFGRKSDFEDEFEVYYSKDQVVMKYVQVFC  
TAKDQVMEHDKLPVWVEPTEDVGEEPVQAEDPMLENIPEFRS1KGGLSQVQGNQIPLENIHVKGRMD  
LVVEV1IFQTYINKSSVPEIAKYVFPFLDSTAACVGEAFPTNGKHVI GEVKEKKQAHQEYRAAIRREGHAY  
LMQDADDDITFVSVGNLPNATV1IKITYITELNLEYETVDFS1PGTVASWQDKALKENTQDTEVKICV  
EESGVSKGCFSLMSVEMSFLKHSIMSYTHN1LMKKTDCKAVIATEKDSSFDGGFRL1I1YLEPTFLQSS  
WNQPRMWEKHPDEDSEACMLVFLPDFETNIQS WDLT1LLDCSNSMESTFQSAQIALLAANFNNSWLSI  
NIISFGTSFKFECVCPKEKNL1PELVQF1KMAKPNMGNTELMKPLQSLCLLAPSSSGTMQNVLLISDGH1  
QENRNVFQILKKNAGKVR1FTCGVGATANRHMLRCLAQYGAGFEFFEDKSKSNWEKKMEAELEKMNSPA  
CTSASVWVQFSENDPEFVQAPAH1PALFKNSCLLVYGFAPRCTQAKLQALIDDKELDTMASTTELTQKTT  
GTM1LHKL1TARAVIRDYEDGFLHEKEHEHEMKKQTKSL1IELSKKYSIVTQFTSFVAVEKRDAQEKPKDY  
VPMNLE11SAEVD1L1PYMTWETENKKK1GVDFPGWKENFCGCGGVPVSDERASLDEEESLFFSFAPP  
PNPDEEESL1YNSPAVAFSFAPPPPPPL1VAKTFDSPTPAVFPFSAPPPPPPSFAPPPPPPLALGM  
PFPSPAPPPPPPLALGMPFSFAPPPPPPL1PAAKSHSTDEVYSLDVALLGAQQVSVCAPPPPPPPGSGIC  
APPPPGF1CAPSPPAFDELLQVLEQTQLAVSMIETEPEKAEHGEADFVRPARKKK1YNTVEPEMGR1HG  
SRRCRVGEAEVALSQKRERAPPVFNALLDLQCEGSVCAPP1R1R1SVTPPVVALSQKRGRALPAFNALLDLQ  
CEEGYLLNEELGCLLNMNVN1LIEVFLSKNGIQSLGKKGEDELKLIATLLVLQ1TCTYELVNVTFKNL  
MKLDESFC1TSFFYETIEKSMWARKDKQYPGICYRLGLGKDWDSATRKLLSD1FVDPSSDLFFAVESSV  
ES1V

>XP\_014020296.2 protein mono-ADP-ribosyltransferase PARP4 isoform X1 [Salmo salar]  
MDKSTYKSMAPFNCDFVLELKLTPKYEKRLKLAITENGGSISYVINKQCTLVVNTISMSSLSASRVRSI  
KKHQTPVVVGYEYVSRCLEKGVL1LPVEDYCLPPPPSTSL1PRPASP1P1SLV1LKGTSQPAEYQIQTVNAV  
NQAESAGNQERTY1LKGFRVYTESDNDLPTYPTNFQVAKYSIFGKANSTWSVLELQSGSTEGGQQYRVV  
RYWRDEHGAKSAAVQDKQVFLSMSEEAEEVYQTLRKLELQVRGL1TRTTLTPPEAPY1LGSAS1QLLLEEL  
SCSSLSQEVGVFVELLMAEALGCLDNV1KVPITSLSLNDVSRAEGLLLQVQRKLARQGE1GPDTEVAS1M  
EEVYTL1PHKTDQSH1PLHTKL1SSQDLCLQILRDV1NVEATLRSP1P1SC1LKG1YRALRCS1ERVPPGPE  
LLVY1TELLQDRQV1LQV1LRVNRGVELQMFREDLGNV1KPL1HSSSPSS1FV1G1LSRGLL1PRVGVHEH1GE  
RTD1GN1LGG1YFSDAMSTSLKYSKPSVT1DGSRL1LVCVDALGRCTDLQKRSDSL1TRSPEGYHSHV1GVRH  
TPKKSEFDDDEYV1VYSP1EQV1RYMV1QRLEEDQLKDFQPT1DTSSTEL1PLVPSP1DLLSCGEAE1DVG  
SCKN1LEE1TAGLLDCS1GQ1PL1PQAV1HVAR1LMD1LSQV11FQTY1NTQSTAP1EAKYV1FPLD1SAAV1CGF  
EAF1NGKH1VMGQVKEKQARKEYQAI1ERGHGAY1LMDQAD1P1VFT1SVGN1LPAGATV1L1KVT1FVTE1LVV  
EGL1NFS1LPGSVAP1WQSS1ALNQRTQV1LEKVCV1TNLDSQGEF1SLDMS1IEMPN1E11NLHCL1THKV1IKRT  
DCAV1NR1TCPGET1LPGD1LGF1VCS1LAQ11HL1PRMW1EKHPDKDSQACMLV1FY1DFDE1F1CPTSS1PMS1GSS1EVI  
LLD1DSSE1MRGDAL1QNARR1ALQ1LNT1MDH1SV1VNW11SFG1SQDK1DAFL1SAN1LVEAL1QPAK1F1MSS1FP  
VQGSTEL1WRFL1RSL1LLP1PSQV1RNL1LLSD1GHV1NQAL1TL1QLV1RQHA1QSRL1F1TCL1G1SPTAN1RML1AL  
AQAGGAY1EF1D1TK1HTW1REK1VAC1VKR1IMS1PCC1SVSV1WVQ1QNF1S1APP1VQ1APS1QLH1AL1FT1TCH1LV  
YGV1PHCT1QAT1L1GDL1SQGN1E1TW1SVTE1LQ1KTR1GT1LHK11TARAV1RDYED1GSL1HTEAE1HEGKK1SVK1  
SF1IELSEK1FS1LSQFT1SFVA1EERD1SEQ1PNV1GFTD1VPK1LS1DEVD1FLPY1LSW1LEE1YEGD1GMD1LSNS  
MSN1LD1GG1PVR1LCN1I1CEE1MVME1GEEH1SV1LQ1VQD1DE1SWE1GLN1SY1L1MGS1MVF1GSP1VTV1SAAT1K1PP1DM  
TLK1SEGA1VTE1DEME1CFND1MYFGL1QSE1HPLR1GVS1IMH1SEAL1TSFY1SPTL1HT1TGSQ1ST1PVT1PY1LAT1KMA1  
MTVE1TD1F1PEL1SET1Q1SL1PE1VRHAK1SRQ1GDFR1RAD1RHK1VCAD1PAF1D1VTET1QK1KSL1VAD1PR1PP1SVL  
QLK1SCAVAD1ALL1PP1AS1VVG1SGP1PP1PAS1V1SS1PGP1PSRL1Q1SFAA1VSD1AL1P1PP1FAV1LS1SGP1PP1S  
RLQ1SFSAT1VS1DAL1P1PT1PAS1V1SS1PGP1PSRL1Q1SFSAT1VS1DAL1P1PP1FAV1LS1SGP1PSRL1Q1SFSAT1VS  
DAL1P1PT1PAS1V1SS1PGP1PSRL1Q1SFS1DAV1SD1L1P1PS1AL1V1SNE1FRA1KH1MRG1HP1K1PGV1GAI1SHT1AT1FPK  
1LQAG1DLL1LSK1PRE1YP1VEL1CET1SKMW1TD1NS1EDK1CGL1VEM1DHW1QPSV1V1PAS1V1SGP1SGF1GGGR1VGS  
QSSQ1HSG1WFG1DTAN1ACY1PGL1FEASS1AG1SLFG1PTL1PYL1GSS1GR1SMGL1SFEAP1LT1GGH1LNS1PL1TTH1GFN  
1LTH1PLGAS1GLSS1LFG1SS1RLT1QQ1HHV1LPQA1QK1PLD1IKK1N1QK1VLGD1SER1EGLE1FRK1NT1L1DVV1KWTE1IFA  
1LQHS1EGW1ECS1AS1GLS1LLG1VDY1FAN1VL1KNRG1IS1SLG1VRAH1ADI1L1RLVAS1LL1VLQ1MRV1RLE1EGK1LL  
1LS1FLR1DL1DHS1PQ1RCR1EWA1VR1RAV1DMV1CWAD1REY1PVC1SRLE1FGW1DES1STR1QLL1G1D1P1P1PL1SL1L  
1LLGT1TG1V1RAQ

>XP\_032828733.1 protein mono-ADP-ribosyltransferase PARP4 isoform X1 [Petromyzon marinus]  
MGLFSAACF1VLDLPSWFRRLQ1LKEGLT1AHGAI1ISHAVT1SHCT1HLV1S1AEGAG1SPSR1KLAAKH1GVV  
CPBEFLDRCFATQ1QLLEPALADD1PADD1NN1I1AVONEER1ENG1VTS1AIR1TKTRDH1KRG1P1AEET1ELN1KV1W  
VDDDED1NR1PAF1PEEF1EMV1RSA1FCKT1SEKEQ1TKEQYMAV1VEQAA1PHSS1GL1VRVA1YAH1ATCKNS1DKYT  
SRL1TK1RMA1GSG1REAE1VFLGH1ACE1VLT1GER1CMV1KVDQ1LPGDL1QLG1SRMF1QQAQ1TES1MAN1FHL1SKEV1GR  
FVSTVW1SEAL1GHL1SLQV1ILL1EPK1QVTKAE1ILL1QLK1KAV1SKDV1HDEGAL1ERLS1NEFYK1IPQKHV  
AVCP1LTGMA1S1SAK1DLCLQ1ILRDV1DANEAT1RNKN1TGDD1S1MRKEN1ALK1KL1TASSH1SAT1TLAQ1FTALR  
C1LL1HLE1PNS1DFNS1IRN1QLL1QSS1HGR1LDG1FK1IK1FRVDR1PAE1IGQ1FRSE1VGN1TRSL1FHAF1APR1SLL1GI  
LSRGL1LL1PKTV1VGE1FQV1ERT1D1GML1CG1YFSD1S1STS1VKY1ARRAA1RDG1GRV1LAV1DC1VAL1GRCH1LVR1RR  
DRSLA1AP1QGH1DSL1HGARA1TPG1ASE1FED1EFV1YD1PRQ1K1RY1IVQ1FCL1SDV1K1EENS1DAEE1FYEA1P  
ET1ADER1IL1PEP1N1PELL1PEQ1GE1PKQ1RL1SGL1HSG1VGS1VPV1LKAV1HVRAN1LD1TAQV1VMV1QEY1DNN1STEP  
IEAKY1T1P1DEMA1A1VCS1FEAF1NGKH1V1GV1KEKE1TAHQY1RNAV1SQGH1AY1LMD1QES1PDV1FV1SVGN1LP  
PACRV1L1KVT1YV1CE1LAA1EGA1VR1FL1PGN1LAP1WQ1RL1ATG1DVT1QET1VET1LAV1AKH1SGRL1SVQ1SVEM1PYE  
1I1NVT1P1THAIR1KRT1ACKAV1LEASS1D1SLG1SE1FQL1LV1FPAQ1I1HEPR1MW1VE1QN1PETS1QAC1IL1TFY1PE  
AP1SHS1EGVD1IV1LDC1SASMT1Q1PLTDV1KR1L1FAL1RHL1PPG1SR1FNV1L1KFG1HYKEL1FPV1FRESS1PNS1IA  
TAVS1F1KR1HAD1AGN1ELMR1PLRS1VALL1AGG1VGS1RDA1AAP1PV1SVLL1TDG1VAQ1SEAR1ATREAK1ENVR1LL  
RVL1AC1GVGET1PN1RY1FLN1ALARN1SG1GACE1FFTAKNR1STWT1DKM1ALMEKAT1QV1CRDV1T1VEW1QR1FDR1GAL1G  
GDR1VEM1QAP1R1ISV1FCG1TRL1V1VY1G1VPHCT1QAT1L1HAI1NNQ1E1FT1MV1STN1LQ1TRG1MK1HLR1L1TAHA1I1  
Q1VED1GN1LHP1DE1TQHEV1IAEM1KSR1L1EL1SKE1YS1I1TP1T1SFVA1VER1SD1T1ADEAT1G1PAL1DELL1SKE1SV  
D1PL1YV1GW1VEE1KARKK1GSG1MFL1RAB1K1K1P1V1G1GRG1GLAS1SK1IKY1KTR1PAC1SL11PEK1TQ1PE1EF  
GSA1ERAN1L1S1PTE1EAA1DAS1QV1PS1EQPK1FAH1SAVE1AP1CNS1NEG1P1NL1SRD1VKD1HG1VSAS1R1TMSA  
SSRF1GER1HL1LHRA1PV1L1KEAF1ECRR1SQ1GCG1FS1AYAPR1SV1VH1Q1LNSA1ET1PV1L1RAQ1AF1L1T1FND1VQ  
PGV1SLG1V1I1MET1PSR1TPPY1QD1TER1GQARR1QSD1R1FNS1AY1P1FK1QK1LAR1VKK1PP1PL1LC1TAR1SPSS  
AAL1MPD1VELH1RAAG1LSRV1PECAK1RDV1CAL1Q1PNR1D1SP1PTD1PE1P1R1L1P1PP1PAQ1HAS1RG1QPM1HDD1FQS  
ST1CQAAS1RL1CEE1SP1GG1SN1LSE1FSD1GYM1PF1ESC1LM1FHT1SPGV1SLCG1SG1SSE1SD1TT1PWQ1HAD1LS  
KIT1CT1QNK1DGS1WDG1VEL1SSL1GWS1PDH1TV1ILK1QGI1QSL1GLR1MEE1A1VRL1VW1TL1VL1QL1RL1RML1GAS  
SLNE1FV1LLL1RRD1VST1AEL1DMF1G1SAD1AFARA1SW1R1STES1VCP1CVCT1R1EL1G1PNW1QAAT1CS1LL1GVA

>XP\_019636962.1 PREDICTED: poly [ADP-ribose] polymerase 4-like [Branchiostoma belcheri]  
MIFQPPEASSKEK1WKEGEK1GPDGAFKHPD1MEG1SVSD1PLLVD1GRF1EVARY1VFLQKDHCKV1TKKGAAAP1VV  
QVLELQV1ASG1D1PDSK1GE1FKY1R1VMT1QETG1KA1EY1YMQ1TAGE1AVQV1G1LYDR1CTKH1PHS1YSRLAP1DGD1T  
PWT1VGS1QL1HQML1REVEAR1PSS1V1PRVL1G1VDS1LMEET1LGN1SH1LTG1DV1LN1LDQ1EKA1E1LL1QLK1Q  
AVERK1APNDEL1QKLS1EFF1SAI1PHRP1DHKDT11KNK1RE1ARK1QDMC1QL1RDM1SVSEAT1GWT1SHPS1AVARY  
HAL1RCN1QSLAR1DSE1DYRT1LESM1HSS1QENG1TP1K1KVES1FVR1C1R1SMEET1GFT1SAI1GN1QT1KFHSS1QAQ1N  
FV1G1LSR1GL1MLPK1VV1DDF1GG1TR1D1AGM1LGH1Y1FSD1AST1SAK1Y1SSPSK1TRGR1K1Y1MV1SEVAL1GKCK1D1VY  
QQD1TSL1Q1PP1Q1G1NSV1HG1VNR1TDD11P1SE1FKDNE1Y1V1NNQ1Q1K1MY1L1VE1FL1SP1DQ1Q1TV1P1VDEA1YL1HL1LT  
F1VE1IE1ED1Q1D1NK11S1LED1VQ1N1AD1PL1DK1V1K1G1L1SK1SGEEM1P1VL1K1SV1HV1RAK1LD1LAQ1V1VL1Q1SK1NE  
NNVA1EAK1V1F1FL1DMA1V1GV1PEAF1NGKH1V1GV1K1E1K1E1AH1REY1QAI1SEGH1AY1LMD1EET1FV1F1TV1SV1G  
N1FL1PRAS1VL1KIT1Y1SEL1AVE1G1EN1IC1FL1PG1SVAP1WQ1K1D1S1EE11QK1D1ETV1KY1G1K1D1AG1KE1F1SLQ1VAME  
MP1D1RT1T1Q1SP1SHK1IR1VKT1ASKAV1LE1EKN1CML1GD1GFL1LQ1GLAE1IH1VR1MW1VER1HP1DKDS1QACML1TFY  
PE1QAE1VM1QGHEV1ILL1DAS1N1MR1GS1PLEA1AKK1VALL1CL1SH1LPKE1CS1FN1VAF1GT1GYE1EL1FV1S1Q1PRIKS  
NVS1K1EA1NF1Q1DLK1ASK1GNT1DAWR1PL1HG1FLL1P1SPG1KTR1NV1FL1SDGH1V1NAD1Q1TSL1D1IAH1YLE1TRV1FS  
CGV1G1ST1SNK1HLL1RA1IAR1VGG1GAF1EY1FDD1K1SK1WER1K1VKS1QLM1KAA1Q1GLT1SV1SV1D1WQ1QDD1D1APP1VQ1A  
PNQ1IV1SL1FNG1SRQ1VV1GYV1PHCT1QAT1L1KAV1NNR1E1STM1V1ST1SELS1ITAG1K1L1HQL1TARAV1R1DME1DGT1L  
HYDR1THE1TK1MGL1K1PY11S1LS1KEY1S1VT1QFT1SFVA1VEK1RE1Q1GED1LT1GDG1PT1KEL1VQK1ESVD1ILSYMG  
WQ1QDE1GL1D1STEL1FEV1K1VGL1GLSD1GRD1PE1VR1VQL1TDD1SLV1LQ1RE1TVY1GNS1LAA1SS1QVNN1FD1SN  
RERS1V1LR1QK1SGGL1GLS1IMG1AE1HN1P1VLL1S1IVK1D1QAAD1T1GQL1FV1GDA1IK1VGN1VNEH1STHDD1VQ1  
HLK1NS1PDD1VK1LTV1RY1RAAT1PY1LAPAK1WS1RY1SSE1Q1CNG1NAS1PAD1NETT1SSEW1KAE1V1TDY1EDMS1CEMT1V  
E1MT1L1GY1SEG1VQ1RMAG1ILD1SS1VE1LEE1SE1D1EME1FGL1FQ1EGWMA1A1DEE1KE11LAK1PEME1KK1V1ALLEK  
CS1RLAS1PMS1RS1AVAT1STAY1S1PTS1TKL1VAYS1V1SKPS1QK1MAL1KRAE1KE1EAP1R1PET1DEV1TV1DT1LKAS  
LDG1I1QAR1DR1LE1DL1EKS1DTL1SAA1PV1FFQAST1A1SEEL1FAATA1EPT1VHEAT1LESK1PAVL1RKS1GRAP1PK  
GAR1FV1RE1PE1PV1SE1VAQ1SAP1SAAS1RAP1AGF1IP1PGAS1FGK1SAG1LVGG1PPT1AEET1K1KE1VAF1GGQ  
FGSD1AV1SQ1GAG1GAT1PFGAP1L1DAT1PFGAP1PFGAP1Q1GAP1Q1GAAK1TK1QE1AQ1RGS1DAV1SQ1GAG1GAT1P  
FGAP1L1GAT1PFGAP1L1GAT1PFGAP1Q1GAAK1KTQEAA1FGQ1GSSNAV1SRGAD1V1TFF1PGAT1SGAT1PS1A

TPFGGTPFASTISLFGHSTTAAKEPEAALFGPASSATPSGGGGFSGSTSSDIPLKDEDKSSVPIDSSKG  
LKGPAPLEEKGTTTGFRRFGSSQAKMIPQGGGFI SHPQMQQQQQAQSNVDRARIPGRKAQSARKTTGGK  
ALRPAADKVASDGVKADSPDVTVMFDESDDAKETKTPTSAKSPKLMIPATCCMCMVYDMPPLYYQQGSPFP  
PAPSRGPPPLPPTSQQEPPPPPPPCAGPPLPAGAPPPPPQFRKSLLLALSQEKLGKSGSQSPTEMIQP  
PPSRAPPPSMGRRPPPPPSMGRRPPPPMTRAPPNNMARLVRDADALYVYVLGETTKRMGARIGARIGAR  
SLKAAELPKGEEEEPMEEVESPAICGEQVEESMDLKRKLKKKKVLELRAEFKKYSELFPVDEREERD  
GRSSLLNQIMRGTSLRRGPGAYHSASPHTSDSAGYFSGTETVVVPVITTRSGSLTERTVDQLFALLKHT  
DQGSWIEFSPELDQLLGISSSTCVQIFNTAGLRSLGAKVAKLLQLVATLLVLQLMLHLPLQFFPSSCSL  
LHLDVMQVAEWRSAVQQVLAWAKGVDTMHPFSVSRLELGRKSWDDLTKKLIGVGVSLVHE

>XP\_032219396.1 protein mono-ADP-ribosyltransferase PARP4 isoform X1 [Nematostella vectensis]

MSVTFPSGLLVLDSSGLPGFSFKQQLRSLKITSNGGTTSYILTKKTDYVLTSDGERTLSSYKGRATAAKL  
GVVPVHIDFIDSLSSGLSAPDPTYILSETPEKQFSSGKIVITAPKGGCFNKKVSSSVQVLQADLSKI  
RFFPYFKSGKPSYDEKSYEIAKHVLYQRRADAGEVLVFAIELHVIPPSTCFDGHYRVFHHHGNFKALK  
EGNDAEQCTKECSYHGSSEALGTIYIALCAKVTQPPHNLTCCKWTLSSKIGSDMKKEESMDTRSSGEGES  
VSQEVASLVLYLWTEAIGCLNSTLSVPLESIKLQKVQEAAILMSLKEEFNTQNKESIKSLMEEFDSLI  
PHQIKIKDSTVNRGLIAEKQNLCLQIRDMVTISEATNMSTVSSHAKYKALRCHIEALHPFEEAEYKAIKE  
LATIEEQTSNDIIVLNVFSLHRPVEDINRYHGLGRQKLLFHASRVNRFVGLSRGLLLPTIVVDDFGGQR  
SDAGMLGHGIYFADRASTSAKYSPPGMLGSRFMLVNRKVALGKSEYRKFTKDLTRPPDGYNSVIGVKATE  
TQPSDFKDDFVVYDTQQQMRYLEVFALPEDDI IARDNVSVDSGVVEEPLDNEDEIEVDLSDVMSIPDP  
LLKVEAGLGKTDKADVPVLKAVHIRAKLLDLAAQVVMQAYCNNSDVPIEAKYVFLPDDMAAVCGFEAFIN  
GKHIIGEVKEKEQARKEYREAI SAGHGAYLMDDEETPDVFTVNVGNLPPAAVSLIKITIYVAELTVEGELIC  
FRLPGSAVPWQRQAADDVTQTDVDTICVDEENQSTNSVQVSEMPFEIRAILCPGHDVKVKRTSTKAVV  
EMAPGGTLGSGFQLQIQLAELHVPFMMVERHDEADSGACMLAFYPEFESGPPHHVEVIFVLDASCSMGK  
KALQEAARKLITMLCSLMEEEMAFNIVFVGSNYSELFTQSQKKDKETVARAAKFVKSVAKVGSTDLMRVL  
RSLLYLLRNSADPNSNVFLFTDGHVTESETTLAIIRDILRLTRVFTFGVGTCTNRHFLRSMARVGAAGAY  
ELFDSKYSKMERKVESQLSKAQPVLTLSVKVAMQQHDSYAKPVOAAPHIVSLFNGSKQVYVYGLVDNCT  
QASLTAEDVGRVSVTWSLSELSITTKGVHLQJLARAARIOWEEGSLDPNHTKHMAKRDMDKPIISLSK  
RFSIYVQFTSFVAIEHRKKDEKFDASLGPSIDELVSHEDVDVPIYVSWEEEPESRDVGKPESSSKSTGDRV  
AGLVSEARVLERFSVLQAETLYKRACDTALSAESPONRATYKAFLSLAQFYVDVHGLQKAEALTMLHG  
ALGGIEHDVSSRSRNFDDLLEHLRQDSSSYDEVGRIVAEFNPMKDKINKSKRVIASPPFNVDYPMWQTVVYN  
KLFEACRSESTETGTSASSTSSSESEELSDNSEDSDWGSDEFYEDNIDDEVYQDAVGESEEEEGED  
DVGCMLEAEAEVERSEAPTPLVIVDGSMMWKGFGAGDDAPKGVFPPIVGRPRHQGVMMGQMGKDSYVGM  
EASHKRGILSLSTPQKREARPTPPLQDRPPPLQDRPPPEAMEGRALTDRVWIPFIEEAPLDHTASIDLEE  
QEDLVVMDKGEVLDDGLFEAMCENNAQKAASLAMGKKRRQVDQLTLDSDYDIEHVLPSNTQVAATLDTD  
DMVMDMNRATSSALKERAVSYDIQDLSCEVAEDAVKEEAEERPITAFGLDSCIARVSSSEKSSLYDEI  
PSPNNRPFKKKVANIPSPKPRPPRASKIAAPPAAPSLQAVCIDLPEPPLKAGDSPLKRSVKAPLPPPPPPQ  
ASRIIDYRASYGAAPAPSLQAVCIDLPEPPLKAGDSPLKRSVKPLPPPPPPQQAARIDYRASVGAAPLPP  
KRGGGPPPLPKRGGGPPPLFGAMALRTGAPSKASKSPFGGRGQPVFATSAEILHPLARTPSELAPKGV  
PSQTNDIEAPVMSRLQLLESIRAKKTKETDREDIMKQDSDGEADI LRREAHQHSMETLEADRNEAEMG  
VRPFRKKGRKMLEKAAAEQKKEAMEEPSESLQNRMKRMWTADKLELFAHQNDGYWSEKELEVAFRDI  
CSFLSRLLLNAGASLGDFAETILKMLTITII TLAILKTYLPDQFPVSLVQGVSSGLVTSSEWRNVQGRA  
LSWLKMRMRKPSVCSRELGLPGDWIDVAKGIIIDDKVHLMI GVR

>XP\_047129290.1 protein mono-ADP-ribosyltransferase PARP4 isoform X5 [Hydra vulgaris]

MFSGCIVTLDLITNASFREKEILRKAIIVNNGGVSYIITKSKTHVNVASKEFAQTSYRCERALKYGVFVV  
TSDFTKSYEAGFLNHHESFLAFKIEKESVDLKSGLSTKSSNNNNCMKKVSEAEVLLNCRVMSDGKGP  
WNNDLILFEPVKYFLLLSENSKDGNRPFCLIELHVSCDAGMARVMQVGNVTEKETSKNVCEYRAAKDAYE  
CEITLFGACINQYKKEFQNKNELESEPLSKSYAIGSKYLYEWPGRNSEVTRTEMTNSHLNVNTIWAQAQNL  
KDLLANSIHSYILADVRAEIGILLQICEFEEKDEKLTLEEYFYSIIKLKNNNVLDNAKII SRMFDLC  
QVTKDVGVSSTNMKTIPIISNAKYKALGNIKELHYEALGELKTTISMSMEAKEIEVLSAFEINRISE  
KGVDFVGFVFFHSTSTENLVGILSRGLLLPKVYVDQHGGERTDVGMNGYIFASAASTCIKYSKPSQTS  
GSRFMLCELNLGKTKTYRKFKDLEAPAGYDSTHGKSTSNESPFDDEFCVYDVRQRITHIVEFK  
LASDNVHHTLNNVDSEDEGISDFDSESELIKDVSVDQDPLSKVYVSLQSSNTQPVPLTAVHIRAKLQE  
FSSEVVVLQAYRNDINPIEAKYVPLESSAAVCSFEAFINGKHIVGKVEKEQARKEYKEAIQQGHGAY  
LMEEQESPDVFTVTVGNLPPNSDVLKITYVAELSLDDQISFSLPGCVAPVWKDQALATKMQNELETI  
NVNNSGFEFSLEISLEMPCAIRSIVSPHTGNILIKKTATKAVVMKNDPLGTSFQLLIALAEIHVPRMMWQK  
SPQDESQKACMLSPFFPEDGIDGHEVIFLIDASNSMKDHFIELQKLYLYTEKMPQSTKFNVMVFNFDY  
KELFFYSRKFDESKQQVMSLLKLLKNCNGGTHLWSVLKMIEMLSCESTMKNVFLFSDGHI FDEISTLARI  
RNLKNVRVLTFFGVGTTPNKHI LQKMACLGSGYFFEYFDNRNAKSKQKKVLELQLEKCCQPVLTNIKIHWIQ  
HDEDAKPLQAPNEITTLFNGNRLVVGFPVPHCTMANLSAILNGKELNITVSTSELSTTVGLTIHRLAK  
SVINDMDQMLHPOQYKHEAIIKARKKGLIQLSIEYSIVTKFTSFIAVEERKNKEGKVTAFTINELVIA  
ETVDLIPMGFETKTSVPMQAKAFSLSEILDGMHMLKDELSLSEDDVDNDSLSLQSESEEEKLYKPK  
IILDIGMAETKAGFAGCRAPKVIPTLVGRPRHQGVMMVGMQKDAYVNEALS KRGILLTLLSPTKLKDG  
ETDSTPLQLIGDGTINIVKPTSKAINPKFKIAKCKREL SKGLSTLQHSVQQSINIDSDVDYQKSYIM  
LTKQKECAEIEQTSDDFLSMQSDNLMMDYCEMLASKEIYLESDSVKDIHQFKLREKKSATPPSSSTRNV  
SSLRKKQPFPEPMVSKVCLQAQMPLDMPMPPPQLMPLFGAKQPSAEPMMLKACSPAKMPDLPMPMPQLM  
PLFGAKQPSAEPMMLKACSPGKTSFFSQPPPPPPAQSMYLFQAKQPLPEPTLSKDCPLGKTSFFSQPPPP  
PPAQSMYLFQAKQPLPEPTLSKDCPLGMLGKKLAAAPPAQSVSLFGSNKSSLMFSRNCFSDDLGMFKR  
EESHLDLDCDDLEMLADEKLSLDYRPAATGTISACHFVKPISCAYYEPCFLERKKTISIENGLSKSVDFCFFK  
DEKFERFPLDGRSFVFLNKTSNEDLINTLEFLVENQHSDDGYWELEDIFDQDQSTISFDILFVDVCRKLA  
LSLCEKYSSEIQRLIATIIIVCVI PKLASNDKALWSYPHYLRNESNKASDKLTSAPFFKGSYILHEDCK  
FPSIHTRLGLGYSLEEMTFQVYRLASQSFDKRMELRL

>XP\_019851276.1 PREDICTED: uncharacterized protein LOC100633591 isoform X2 [Amphimedon queenslandica]

MENLDSLFRGQITLELDSISPFKKKSAKQSVIQYGGIVSFIVTKKTHLVVNNVEKAQDSYKSRMAQK  
WGIPVVVISKFIEDCIENKGLLEPDQFVVAGKTPSEELSSGKIVASMEDKSNDRKKRKPKNVNLNQIKV  
WPMFHADGKMTPLFPEDGYEIVRHAFPKYKMSKLTSFVAIEIHVVPTSVTEDKPLYRVFVHKHGLEQR  
LKTGELGTCECRIVETSLDAEAVIAYLQKQITSSPYSMERVQIQLSMIGSPGLRKLMSETWPRGVAGSRE  
DLDBLVSKLYEYVSEALIEIGFPLTVLQNIKLQVEKEAEALMSIRKLLDEGRIGDDEDIKKTYKQYN  
SALPNSKAPRIDSXKVIANRQEPFCQVIRDLVSVSESTNWSHKSGVPVAKYHALRCQMCPIDVPVSKEYSDVK  
EHIMSSLTNDSNDPEILSIYSVQRVVEESQFSSHLSGNKRLFLHSSQLQNFVGLSLRGLLLPKVIVVDDPVG  
SRSDPQMLGSGGIYFADSASLSVKFSQPKRHRGTRMLMNEVALGNVKEFTSYQKELLAAPNGFHSYKGV  
KGTTEEPSDFKENEYVVYKTEQQRMRYLIEFRLPQDEEIQDQTESEKYEENEEIEDEESNIVTDGVSL  
DVKNVTDPLSKVEAGLVKDGGVPLKAVHVKALQIDLAAKVIVLQSYKNESLVPTEAKYVFLDDMAAVC  
GFEAFINGKHII GEVKEKEQAHREYQKAISEGHGAYLMDDEETPDVFTVSVGNLPPGASVLIKITIYVAELQ  
AEGENVVFLSPGSVAPWKQEAALDETTQVDVEKVKRSDADLSVQISIDMPFTIRTIESPAHKIKMKKT  
DTKATVELCPGEKLTGTGFQLLIGLAEIHVPRMVEENDKGHHACMLTFYEFEEAESIVENEIFLLDVSN  
SMKGDALDNAAKVVLLLLLHHLPPKTYFNVFTFGAMFEIFFPSSVQINNETLSFATKQVQSCQAVMGNTDI  
WRPLHSLYLLSEAASSSTGGLTNSSTLPPCSPFVIVSDGHMTEAPLSAIKDGAQNYRVFTFGVSSSTANR  
HFLRSMARVGGCSEFFDSQKKSRRERKVKELSKAFQPALTGVGVQWQHEDENAPPIQAPKSIITSLFS  
GSRQVYVGVPHCKQASLKAFI GRKEIQTMVSTSLDATTSGQTLHQLTAQALIRDWSEGLNDRDTEHEI  
MKRDLKFTIINTSKEYSIVSQFTSFVAIEKREKDEKFDATKGPSIEDLVSKENVDKLYMGWEIQDQADP  
VKIAAESIIDVVIASMAGETDVIKLDITAFNKNVSESTQNTLPNSHPARVKLLKMRLEVLLKMKDKLSDGQELL  
EGLITDHLHRLGSDISTRILNVLEIGIRDGFSRMI DAKRKAEEAEAAARRSRMMI VAEAAKSLRQSTLETERD  
GGIIEGARMEILKSRITAFKQKIEIESLESKLHLITRRRGRALKKDIIPAEERKASPKVPLKKKKAVAKNRGP  
IRQESPEKDEISIVAEGRRSIRMEBEPDEEDIPVAVITDGMDTVAKGAGAGDGRSVFPAIVGRFRHQ  
GVMMQMGKDSYVGEAKSKRGILLTKSPFERPSKPMMAASQPIVQYVEKEKESASVTEEDVNLNLFQ  
YDGRNYESIDFSMAENYQVNEVLMDELEMDSELMQESLMVESAEIYEELEQOSEETIAYNQKELRSRKYK  
KSIPGTSPTSLLLKGLGSKPEQEGQLGTGLAGFASKPPEGYLSLIDIEGLAMPANKETYSPLSQTYNPVSP  
VYSPTSVTPSPAYSPTSPSYSPSLPSYVPTCTTSPAYNAPTNGKLSAPSVPGLTNRNSDKVSDSSSETSR  
NLSQLSAYLGS GKSRFESVLSLEKSAPLSQPTAAPPSRSRIVRFEAGALTGSSSQAPLEVPVPPPLPP  
RAVMTKSAPSEPIYPSFDGIPAFSVRNAISSSPGSPPELTWMSSPFKSPPLPRSAPLPGGPPAKPSRS  
SGRALMQSGGPPPPPPPPGTGAPMQLSEKSPPPPPVPLRSRDRGPMVPQSTVLSGRPPPPPPPHFMLC  
GEVPMPSGGPPPPPLPYLSRGIAQRLLPGGPPPPPPPPPGGAAGAPLPGSSKVA PKGKSKVSYAGLADKK  
TTPQASPFSGAGGKKEPSGTGRGALLSSIKKGVSLQKVTEKKEEKSVASLMQALQSRKAPEAFNLKL  
VDYSKWSVEMSDDDSDDDDEDDDEGGGGGGGRSLLVNEFFAFQDQERAEDKVQGESEEEEEESDNNMA  
FGLFDSFDEEALSNASYSMSENAQESDGEKVI EVQNFVFINSSQIYMMYSLQKDDGSWLLSDLDITVIM  
PGTGDRVLVNLNEAGAKSLGSRVYKELLSIATCTFVLRLLNLFNDAYKITFSPHFEIDMSNGDPGDIAT  
PMKNSLVLCNKLHKQNPSVTRLELGYSLIDAVDKILKLA

## Alignment

|                                 |                                                                |     |
|---------------------------------|----------------------------------------------------------------|-----|
| XP_047129290.1[H.vulgaris]      | -----MFGSCIVTDLA--TNASFREKEILRKAINVNGGVSYIITKKSTHVVVA          | 48  |
| XP_032828733.1[P.marinus]       | -----MGLFSACFIVLDLP---SWPRQRRLQLKEQLTAHGAIIASHAVTSHCTHLVVS     | 49  |
| XP_032219396.1[N.vectensis]     | -----MSVIFSGLLFVLDDSSGLPGFSFKQKQLRSKITSNGGTISYILTKKTDYVLTS     | 53  |
| XP_019851276.1[A.queenslandica] | ----MENLDSLFRGCQTLELD--SSIPFKKKSALQSVTIQYGGIVSFIIVTKKTTHLVNV   | 54  |
| XP_019636962.1[B.belcheri]      | -----                                                          | 0   |
| XP_014020296.2[S.salar]         | MDKSTYKSMAPFDCNCFVLELK---TLPYKEKKRKLKLAITENGSGISVYINKQCTLVVTI  | 57  |
| XP_041440458.1[X.laevis]        | -----MTVAIFSDCVFLKIN---DLSFKERKALKSTITSNNGVTSFVLNKKQCTHVNVN    | 51  |
| XP_046764289.1[G.gallus]        | -----MTIPANCVPFIKLK---YSSIQKKNLSKACIEENGGAIDFVLNNKCTHVLVD      | 49  |
| EDL36193.1[M.musculus]          | -----MTLGIFANCIFCLKVK---YLPQQKKKLLQTDIKENGKGFSLNLPQCTHIVID     | 51  |
| NP_006428.2[H.sapiens]          | -----MVMGIFANCIFCLKVK---YLPQQKKKLLQTDIKENGKGFSLNLPQCTHIIID     | 51  |
| NP_001125927.1[P.abelii]        | -----MMMGIANCIFCLKVK---YLPQQKKKLLQTDIKENGKGFSLNLPQCTHIIID      | 51  |
|                                 |                                                                |     |
| XP_047129290.1[H.vulgaris]      | SKEFAQTSYRCERALKYGVVPTSDFITKSVEAGFLLNHESFLAFKIEKESVDE---LKS    | 105 |
| XP_032828733.1[P.marinus]       | AEG-AGSPSRLKLAAKHGVRVVCPEFLDRCFATGQLLEPALADDPADNNNIAGNEEREN    | 108 |
| XP_032219396.1[N.vectensis]     | DGERTLSYKGRATAAKLGVPVVIDFIDSCLSGGLSAPDPTYILSETPESKQFS-S---     | 109 |
| XP_019851276.1[A.queenslandica] | NVEKAQDSYKSRMAQKWGIPVVSIKFIEDCIENGKLLPEDPQFVAGKTP-SEELS-S---   | 109 |
| XP_019636962.1[B.belcheri]      | -----                                                          | 0   |
| XP_014020296.2[S.salar]         | SMS-SLSASRVRSIKKHQTPVVGVEYVSRCLEKGVLIPVEDYCLPPPPSTSLIPP--RPA   | 114 |
| XP_041440458.1[X.laevis]        | TIA-FLSASQLKTQKHQIQIVDSHFIMKCLEEKLLIDYQYLTAGVTPSEKEPQ-SWQA     | 109 |
| XP_046764289.1[G.gallus]        | NAN-VLSHHNKLTKQYQLPVLADFWKSVENGKLLVTDAFEV--NTSQGNISN-QWPG      | 105 |
| EDL36193.1[M.musculus]          | SAD-VLSRCHLNSIQKNDVQIANPAFIQDSVQRLLLDVRNYDP--LSPAPAAP---PA     | 104 |
| NP_006428.2[H.sapiens]          | NAD-VLSQYQLNSIQKNHVIANPDFIWSIREKRLLDVKNYDP--YKPLDITP----PP     | 104 |
| NP_001125927.1[P.abelii]        | NAD-VLSQYQLNSIQKNHVIANPDFIWESVREKRLLDVKNYDP--YKPLDIIIP----PP   | 104 |
|                                 |                                                                |     |
| XP_047129290.1[H.vulgaris]      | GKLSLKSSNNNMCKKVS-----EAEVLLNCRVMSDGK-----GPMN                 | 142 |
| XP_032828733.1[P.marinus]       | GV-VTSAIRT-KTRD-HKRGPPAEETFELNKNVKLVWDDD-----EDINRPA           | 151 |
| XP_032219396.1[N.vectensis]     | GKIVTAPKQG-GCFNKKYSVVQVLQADLSKIRFFPY-----KGSKGPSY              | 153 |
| XP_019851276.1[A.queenslandica] | GKIVASMEDK-SNSDRKKRR--PKSNVNLIQIKVMPWPHA-----DGMKTPLF          | 154 |
| XP_019636962.1[B.belcheri]      | -----MIF-----Q-PPEA-----SSKEKVMKEGEGKPDGAFKHPDMEGSVSDPLL       | 40  |
| XP_014020296.2[S.salar]         | SPLPSLSVLK-GTSQ-PAEVQIQTVN-AVN--QAESAGNQERTYLGKFRVYTESDNDLFT   | 169 |
| XP_041440458.1[X.laevis]        | D--PEKTVF-----P-----E-----NVPTLQNKDELWDRDYSE---FDSETFT         | 143 |
| XP_046764289.1[G.gallus]        | G--HGLEDL-----S-SSENKIATNQNESDNSNLTVIGESDKRIEFKVGTLRFHSENASV   | 157 |
| EDL36193.1[M.musculus]          | E--R-----SR-----E-VQ--SE-----YLPSDNTEPEKENTEVTEVAENVEIPP       | 141 |
| NP_006428.2[H.sapiens]          | D--Q--KA-----S-SSEVK--TE-----GLCPDSATEEEDTVELTEFGMQNVEIPH      | 144 |
| NP_001125927.1[P.abelii]        | D--Q--KP-----S-SPEVK--TE-----GLCPDSATEQEDTVELTEFGTQNVEIPH      | 144 |
|                                 |                                                                |     |
| XP_047129290.1[H.vulgaris]      | NDILFEVPKYFLLLENSKSDG----NRPFCLIELHVS CDG-----AMRWVCQYGN-      | 188 |
| XP_032828733.1[P.marinus]       | FPEEFEMVRSAIFCKTSEKQ---TKEQHMVAVVEVQAAPHS-----SGLVFRVAAYHATC   | 203 |
| XP_032219396.1[N.vectensis]     | DEKSYELAKHVLQRRADAQE---VLVFSALELHVIIPS---TCFDGHYRVFHHHGNF      | 206 |
| XP_019851276.1[A.queenslandica] | PEDGVEIVMHAFFPKYKMKSK---LTSFVAIEIHVVPTS---VTECKPLRVFVHKHGL     | 207 |
| XP_019636962.1[B.belcheri]      | VDGRFEVARYVPLQKDHCCKYTKKGAAPVQVQLVQASGDPSSKGEFKYKVMT--QE-      | 97  |
| XP_014020296.2[S.salar]         | YPTNFQVAKYSIFGKANS-----STWSVLELQSGSTE-----GGQQYRVVRYWRE-       | 215 |
| XP_041440458.1[X.laevis]        | DPDDEFAKYSFFHK-----GSNVAFLELLCFPE-----SSSFLFKISKVICD-          | 186 |
| XP_046764289.1[G.gallus]        | FPQDFEVAKYNVLEKINSKG-----SKDFVVIELHCSQE-----QYEFRLFCAHFA-S-    | 205 |
| EDL36193.1[M.musculus]          | FLQDFEVVKYNILEKV---G-----GPETVVVELQSSQD-----PESCPFITAHFLL-     | 186 |
| NP_006428.2[H.sapiens]          | LPQDFEVAKYNTLEKVGMEG-----GQEAUVVELQCSRD-----SRDCPFLISSHFL-     | 192 |
| NP_001125927.1[P.abelii]        | LPQDFEVAKYNTLEKVGMEG-----GQEAUVVELQCSRD-----SRDCPFLISSHFL-     | 192 |
|                                 | :: : . : :                                                     |     |
|                                 |                                                                |     |
| XP_047129290.1[H.vulgaris]      | --NVTEKETSKNVCEYRAAKDAYECEILFGACINQYKPEQNKNELSEPLSKSYAIGSK-    | 245 |
| XP_032828733.1[P.marinus]       | KNSDKV---TSRLTKVRMAGSGREAELVGHACEVLTGERCGMVKVDQ-LPGDLQLGSRM    | 259 |
| XP_032219396.1[N.vectensis]     | KALKEGNDAEQCTKECSYHGSSSEALGTYIALCAKVTQPPHNLTCWC--TLSSKIGS--    | 262 |
| XP_019851276.1[A.queenslandica] | EQRKKTGEL--GTCECRYVETSLDAEAVYALCKQYTSSSPYSMERV-Q--YLSFMIGSPG   | 262 |
| XP_019636962.1[B.belcheri]      | ---TGG-----AKERYMQTAGAEAVQVYIGLYDRCTKHPHYSKRLADGDTPTWVGSPQ     | 148 |
| XP_014020296.2[S.salar]         | ---DHGAKSAAVQDKQVFLSMSEEAIVEYQTLRKLELQVRGLTLRTPL--PEAPYLGSA    | 270 |
| XP_041440458.1[X.laevis]        | ---SNGAEP---DSSQFANTAEASQKYKECTEALQKQFKRVKRIIP--PKVALLTSEA     | 238 |
| XP_046764289.1[G.gallus]        | ---SNCKKK---DKQFLINKTAEIRENYDILVANLKSQOFLIRETFP--PEACLASTK     | 257 |
| EDL36193.1[M.musculus]          | ---ADQK-T---RESTCKQTSDEAIEYFESYVEDLKQOGLLQEHFT--AEATQLASEK     | 237 |
| NP_006428.2[H.sapiens]          | ---DDGMEF---RRQFAIKTSEDASEYFENYIEELKKQGLLREHFT--PEATQLASEQ     | 244 |
| NP_001125927.1[P.abelii]        | ---DDGMQT---RRQFAIKTSEDASEYFENYIEELKKQGLLREHFT--PEATQLASEQ     | 244 |
|                                 | : *                                                            |     |
|                                 |                                                                |     |
| XP_047129290.1[H.vulgaris]      | ---YLYEWPGRNSEVTRMTSNLSHLVNTIWADAQNLKDLLANSIHSYILADVVRAG       | 301 |
| XP_032828733.1[P.marinus]       | FQQAQTE-----ISMANFHLSKEVGRFVSTVWSEALGHLSQLQVPIILLIEPKQVTKAEA   | 314 |
| XP_032219396.1[N.vectensis]     | --DKMKESMDTRSSGEGESVQEVASLVVDYLWTEAIGCLNSTLVSPLIESIKLQKVQEAEA  | 321 |
| XP_019851276.1[A.queenslandica] | LRKLMSETWPRGVAGSREDLPLVSKLVEYVWSEATGIEGLFTVPLQNKLEQVEKAEA      | 322 |
| XP_019636962.1[B.belcheri]      | LHQMLREVE-----ARPPSSVSPRVLGLVDSLMEETLGNLSHILTGVDVINLNDQIEKAEA  | 203 |
| XP_014020296.2[S.salar]         | LQQLLLEEK-----LSCSSLSQEVGVFVLLMAEALGCLDNVLKVPITSLSINDVSRAEG    | 325 |
| XP_041440458.1[X.laevis]        | LQKVLLLEA-----INATKLSPVGVGFVESVWTEALGHLDKILSRPVNSISLNDVSKAEG   | 293 |
| XP_046764289.1[G.gallus]        | LQKLLLEES-----INSSAICQEVSDFVELIWAELAGHLDSLLLESVNNSISLNDVSKAEG  | 312 |
| EDL36193.1[M.musculus]          | LQALLLEEV-----ISSGALSQEVSDLEVIWTEALGHLENTLLKPVNSMSISLNDVSKAEG  | 292 |
| NP_006428.2[H.sapiens]          | LQALLLEEV-----MNSSTLSQEVSDLVEMIWAELAGHLEHMLLKPVNRISLNDVSKAEG   | 299 |
| NP_001125927.1[P.abelii]        | LQALLLEEV-----MNSSTLSQEVSDLVEMIWAELAGHLEHMLLKPVNRISLNDVSKAEG   | 299 |
|                                 | : : . : : : * : : : : : : : : : : *                            |     |
|                                 |                                                                |     |
| XP_047129290.1[H.vulgaris]      | ILLQIKCEFKKDD---EKLKTLSEFPYSIKLKKNNN-VLDNAKISRMPDLQCVIKD       | 355 |
| XP_032828733.1[P.marinus]       | ILLQLKKAVALSKDVH--DEGALERLSNEFPYKIPQKHVAVCPITGMASISAKLIDLQILRD | 373 |
| XP_032219396.1[N.vectensis]     | IILMSLKEEFDNTQ---NKEKISKLWEEFDSLIPHQIKIKDSTVNGKLIAEQNLQCLIRD   | 378 |
| XP_019851276.1[A.queenslandica] | ALMSIRKLLDEGRT--GDEDIKKYTKDYSALPNKS---APIDSKKVIANRQEFQCVIRD    | 379 |
| XP_019636962.1[B.belcheri]      | ILLQLQKAVERKA---PNDELQKLSSEFFSAIPHRPDHKDTINKNKEIARKQDMCQLIRD   | 260 |
| XP_014020296.2[S.salar]         | ILLQVQRKLRARQGEQPDTEVASIMEEVYTLPHKTDQSHLPLHTKLISSQLDLQCLIRD    | 385 |
| XP_041440458.1[X.laevis]        | ILLQVRKALDTGETF---GDISKAMAEFYRLPHKKFML-VNINKKLLSTQKDLQCLIRD    | 349 |
| XP_046764289.1[G.gallus]        | ILLQVKNALNEGANE---TALQEMMEFYQLIRHKTEID-YEVTKRLLSRKQDLQCLMRD    | 368 |
| EDL36193.1[M.musculus]          | ILLLVKTKALNGDSP---GQLQKTMAEFYRLPHRHPAS--EEVNLRLLAQKEDLCQLVRD   | 348 |
| NP_006428.2[H.sapiens]          | ILLLVKAALNGETA---EQLQKMMTEFYRLIPHKGTMP--KEVNLGLLAKKADLCQLIRD   | 355 |
| NP_001125927.1[P.abelii]        | ILLLVKAALNGETA---EQLQKMMAEFYRLIPHKGTTTP--KEVNLGLLAKKADLCQLIRD  | 355 |
|                                 | *: : . : : : : : : : : : : : : : : : *                         |     |
|                                 |                                                                |     |
| XP_047129290.1[H.vulgaris]      | VVGVSSESTN-----WKTIPLSNARYKALGNIKELHYEAL--                     | 390 |
| XP_032828733.1[P.marinus]       | VVDANEATNRKNKTGGDDSSMRKENLAKKLTASSHSAITLAQPTALRCSLHLHLEPNSSDF  | 433 |
| XP_032219396.1[N.vectensis]     | MVTISEATN-----MSTVSHLAKYKALRCCKIEALHPEEAAY                     | 415 |
| XP_019851276.1[A.queenslandica] | LVSVSSESTN-----WSHSGKGVAKYHALRCQMCPIDPVSKEY                    | 416 |
| XP_019636962.1[B.belcheri]      | MVSVSEATG-----WTSHSAAVARYHALRCNQSILARDSBY                      | 297 |
| XP_014020296.2[S.salar]         | VILNVSEATL-----RSPISPCGLKYKALRCSTIERVPPGPELL                   | 422 |
| XP_041440458.1[X.laevis]        | MVSVCEATNL-----SKPNPSILAKYQALRCQIEHVESDTEEF                    | 386 |
| XP_046764289.1[G.gallus]        | MINIRETSM-----SCPNPSSLAKYKALRCCKIDAVDPMSEF                     | 405 |
| EDL36193.1[M.musculus]          | MVNVCEATNL-----SKPNPNSLAKYKALRCCKIEHVQDQNTTEF                  | 385 |
| NP_006428.2[H.sapiens]          | MVNVCEATNL-----SKPNPSSLAKYKALRCCKIEHVQDQNTTEF                  | 392 |
| NP_001125927.1[P.abelii]        | MVNVCEATNL-----SKPSPPSLAKYKALRCCKIEHVQDQNTTEF                  | 392 |
|                                 | :: *. : : : : : : : : : : : : : : : *                          |     |
|                                 |                                                                |     |
| XP_047129290.1[H.vulgaris]      | GELKKTISMS-SMEAKEIEVLSAFELNRISEKGG---VDFVGPFPHSTSTENLVGILSR    | 445 |
| XP_032828733.1[P.marinus]       | NSIRNQLQSSHGRLDGFKILKIFRVDRAPIQGFRSEVGNTRSLFHAFAPRSLLGILSR     | 493 |
| XP_032219396.1[N.vectensis]     | KAIKELATEE-QTGSNDIIVLVFSLHRPVEDINRYHGLGRQKLFLPHASRVNRFVILSR    | 474 |
| XP_019851276.1[A.queenslandica] | SDVKEHIMSSLDNSNDPEILSIYSVQRPVVEESQFSHSLGNRKLFLHSSQLQNFVILSR    | 476 |
| XP_019636962.1[B.belcheri]      | RTLSEMIHSSQNGTTPPIKVESVFRVCRSMEEGTFTSAIGNIKTQFHSSQAQNFVILSR    | 357 |
| XP_014020296.2[S.salar]         | YVT-----EL-LQDRQVQILQVLRVNRGVELQMFRDLGNVKPFLHSSSPSSFGVILSR     | 445 |
| XP_041440458.1[X.laevis]        | HQVSQQIRENK-HCEESI KILKIFRVGLKSEATGQQRNLGNVKSLHLHASSPSHFVILSR  | 445 |

|                                  |                                                                   |     |
|----------------------------------|-------------------------------------------------------------------|-----|
| XP_04764289.1 [G.gallus]         | LVQVERVQLKNN--YNGCSVRILQVVRIGVRSVTEAFGLSGLNVRSLFPHASVVRNFMGILSR   | 444 |
| EDL36193.1 [M.musculus]          | SRVKEVQLQNN--RSEQPVDFVIGVYFSDSISTSVKYARRAARADGRGLVAVCDVALGR       | 504 |
| NP_006428.2 [H.sapiens]          | LRVKEVQLQNN--HKSFPVDVLQVFRVGRVNETTEFLSKLGNVRFLHSGSPQVQNVGILCR     | 451 |
| NP_00125927.1 [P.abelii]         | LRVKEVQLQNN--HKSFPVDVLQVFRVGRVNETTEFLSKLGNVRFLHSGSPQVQNVGILCR     | 451 |
|                                  | *****                                                             |     |
| XP_047129290.1 [H.vulgaris]      | GLLLPKVVVDVQHGGERTDVGMLGNGIYFASAASSTCIKYSKSPST--SGSRFMLLCELNLNGK  | 504 |
| XP_032828733.1 [P.marinus]       | GLLLPKTVGVGEFVERTDITMGLGCGYIFSDSISTSVKYARRAARADGRGLVAVCDVALGR     | 504 |
| XP_032219396.1 [N.vectensis]     | GLLLPTIVVDVQGGSRSDAGMLGHGIVFADRASTAKYSSPGM--LGSFRMLKNVAKVALG      | 536 |
| XP_019851276.1 [A.queenslandica] | GLLLPKPIVVDVDFGGRSDPMLGSGSIVFADSSASLVSFKSGPGKKRRHTRMLNVEALNG      | 532 |
| XP_019636662.1 [B.belcheri]      | GLMLPKVVVDVDFGGRITDAGMLGSGIYFSDA--TSAKYSKSPST--RGRMYVSEVALGK      | 515 |
| XP_014020296.2 [S.salar]         | GLLLPKVGVGEHGIERTDITNGLNGGIVYFSDAMTSLKYSKSPST--DGSRLLVCDVALGR     | 445 |
| XP_01440458.1 [X.laevis]         | GLLLPKNVEDDLGLERTDITNGLNGGIVYFSDISTGVKYSSEPSV--NGARLLVCDVALNG     | 504 |
| EDL36193.1 [M.musculus]          | GLMLPKVVDVDFGGRSDPMLGSGSIVFADSSASLVSFKSGPGKKRRHTRMLNVEALNG        | 502 |
| XP_04764289.1 [G.gallus]         | GLLLPKV--AEDRGVQRTDVGNLGSGIYFSDSLTSLIKYAHAGET--DGSRLVVCVDAKLG     | 523 |
| NP_006428.2 [H.sapiens]          | GLLLPKV--VEDRGVQRTDVGNLGSGIYFSDSLTSLIKYSHPGET--DGTRLLLICVDAKLG    | 509 |
| NP_00125927.1 [P.abelii]         | GLLLPKV--VEDHGVQRTDVGNLGSGIYFSDSLTSLIKYSHPGET--DGTRLLLICVDAKLG    | 509 |
|                                  | *****                                                             |     |
| XP_047129290.1 [H.vulgaris]      | TKTYRKQFKDNLAEAPAGSDSHTGKVSSTNEPSDDDDDEFVYDVSRQRTITHIVEFKLASD     | 616 |
| XP_032828733.1 [P.marinus]       | HLVRRRRDSLAAAPGSDSHLGHARTLTGSSEFFDEFCVYDVRQKRLYIVQFCSLE           | 613 |
| XP_032219396.1 [N.vectensis]     | SKKEYRKFTKDLTRPPDGNSYVIGKATETQPSDFDKDEFVYVTKQQMRVLYIEFALPDE       | 592 |
| XP_019851276.1 [A.queenslandica] | VKEFTSYQKELLAAANGFHSKVGKVGITTEPDSGLSPFENEYVYVTKQQMRVLYIEFALPQ     | 596 |
| XP_019636662.1 [B.belcheri]      | CKDVYQQDTSLTQTPGNSYVHVGKVTNDITSEFEEKDNEVYVYVNNQQMRVLYIEFALPQ      | 475 |
| XP_014020296.2 [S.salar]         | CTDLQKRDTSLTQPEGSHVHVGVRHPTPKKPSFEDNEVYVYVSPQMRVLYIEFALPQ         | 594 |
| XP_01440458.1 [X.laevis]         | CRDLYKRDFTSLTEANGPDSVHVGVRTPGFRKGSDFDEFCVYVYVSKQDQMRVLYVQFCTAKD   | 564 |
| XP_04764289.1 [G.gallus]         | CLDLYVERDTSILMAAPSGNSVHVGKRTADNDSFDEFCVYVYVTKQVIRVYVQFCTAED       | 583 |
| EDL36193.1 [M.musculus]          | CYNLFKPKDFTSLTPGNSYVHVGKSETTSVTPGNSYVHVGKSETTSVTPGNSYVHVGKSETTSV  | 562 |
| NP_006428.2 [H.sapiens]          | CMDLHEKDFSLTEAPGSDSHVHVGSTASVTTTDFDEFCVYVYVTKQVIRVYVQFCTAED       | 569 |
| NP_00125927.1 [P.abelii]         | CMDLHKDFTSLTEAPGSDSHVHVGSTASVTTTDFDEFCVYVYVTKQVIRVYVQFCTAED       | 569 |
|                                  | *****                                                             |     |
| XP_047129290.1 [H.vulgaris]      | NVHHTLNDVDSED-----EGIESDFTSESLISKDVSVDQPSKSVYQSQSTNQ--P           | 616 |
| XP_032828733.1 [P.marinus]       | VVKEENSDAVEEYFPEATPAD-ER-IL-PEPNI-PELPGQEGFQRLSGHSGVGS--P         | 618 |
| XP_032219396.1 [N.vectensis]     | DIARINVNDVSGFVEEPLDN-----EDEIVLSDVMISIPDLLKVEAGLKGDTADK--P        | 645 |
| XP_019851276.1 [A.queenslandica] | EEIDQDDETESEK--YENEEIEDEESNIVDTGVSLSKDNVDTPLSKVEAGLKVDD--GG--V    | 652 |
| XP_019636662.1 [B.belcheri]      | QVTPVDVEAYLLH--LTPVEIEEDQDLN-ILKSLEDQNIADPLDKVKGLLKSQGEEMP        | 530 |
| XP_014020296.2 [S.salar]         | QLKDQFPTDITDTS--TEPLPVPSPDSLSCGEAEEDVGSKNPLEEVATGLLDCSQG--P       | 652 |
| XP_01440458.1 [X.laevis]         | QVMNEHDKLPFWV--EPTDEED--GEFV--QAEDEPMLENIPEFRSILKGGLSVQGN--Q      | 616 |
| XP_04764289.1 [G.gallus]         | QIKQFQPTCEVEI--EQDNTEPEFSQCHL-----QNEDESPANSINIVDTGVSLSKQDRLGN--P | 636 |
| EDL36193.1 [M.musculus]          | QIKQFHPHSDHTEL--EYRPREFSN--FS--KVEDYQLPDAKTSSTSSKAGLQDASGN--L     | 613 |
| NP_006428.2 [H.sapiens]          | QIKDHPHSDHTEL--EYRPREFSN--FS--KVEDYQLPDAKTSSTSSKAGLQDASGN--L      | 620 |
| NP_00125927.1 [P.abelii]         | QIKDHPHSDHTEL--EYRPREFSN--FS--KVEDYQLPDAKTSSTSSKAGLQDASGN--L      | 620 |
|                                  | **                                                                |     |
| XP_047129290.1 [H.vulgaris]      | VPLTAVHIVRAKLLQEYFSEVVVLQAYRNDNISNPIEAKYVFFLESAACVGSFEAFINGKHV    | 726 |
| XP_032828733.1 [P.marinus]       | VPLKAVHVRANILDTQAIVVQYENDNSTPEVIEAKYVFFLEDAEAAVCSFEAFINGKHV       | 678 |
| XP_032219396.1 [N.vectensis]     | VPLKAVHIVRAKLLDLAAQVVMVQACNNSDVPIEAKYVFFLDDMAAVCGFEAFINGKHV       | 705 |
| XP_019851276.1 [A.queenslandica] | VPLKAVHVVQAQLDLIAAKVILVQSYKENSELVPVIEAKYVFFLDDMAAVCGFEAFINGKHV    | 712 |
| XP_019636662.1 [B.belcheri]      | VPLKSVHVRKALLDLIAAQVILVQSYKNNENVAIEAKYVFFLDDMAAVCGFEAFINGKHV      | 710 |
| XP_014020296.2 [S.salar]         | VLQQAIVHVARILMDLSQVILFQTYTNKSSVPIEAKYVFFLDDMAAVCGFEAFINGKHV       | 592 |
| XP_01440458.1 [X.laevis]         | PLENIHIVGRMDILVMEVIFQTYTNKSSVPIEAKYVFFLDDMAAVCGFEAFINGKHV         | 596 |
| XP_04764289.1 [G.gallus]         | VPLSVHVIKARIIDTFAVQVVFQTYTNKSHVPIEAKYVFFLDDMAAVCGFEAFINGKHV       | 676 |
| EDL36193.1 [M.musculus]          | VPLSVHVIKARIIDTFAVQVVFQTYTNKSHVPIEAKYVFFLDDMAAVCGFEAFINGKHV       | 713 |
| NP_006428.2 [H.sapiens]          | VPLSVHVIKARIIDTFAVQVVFQTYTNKSHVPIEAKYVFFLDDMAAVCGFEAFINGKHV       | 680 |
| NP_00125927.1 [P.abelii]         | VPLSVHVIKARIIDTFAVQVVFQTYTNKSHVPIEAKYVFFLDDMAAVCGFEAFINGKHV       | 680 |
|                                  | *****                                                             |     |
| XP_047129290.1 [H.vulgaris]      | GKVKVEKQKAEYKEAYKIQGGHGYALMEEQEESPVDFTVTVGNLPSNDSVLIKITYVLAELS    | 736 |
| XP_032828733.1 [P.marinus]       | GKVKKEKETHAQQYRNAYVSGHGYALMQD--ESPVDFTVTVGNLPSNDFACRVLKITYVLCELA  | 786 |
| XP_032219396.1 [N.vectensis]     | GEVKEKEQKAEYKEAYKISAGHGYALMDE--ETPDFTVTVGNLPSNDFACRVLKITYVLCELA   | 763 |
| XP_019851276.1 [A.queenslandica] | GEVKEKEQKAEYKEAYKISAGHGYALMDE--ETPDFTVTVGNLPSNDFACRVLKITYVLCELA   | 770 |
| XP_019636662.1 [B.belcheri]      | GEVKEKEAHEAYKEAYKISAGHGYALMDE--ETPDFTVTVGNLPSNDFACRVLKITYVLCELA   |     |

|                                   |                                                                      |      |
|-----------------------------------|----------------------------------------------------------------------|------|
| XP_01936962.1 [B. belcheri]       | -----KCESFNVVAPGTGYEELFAVSPRIKSNVSKAEFMFDQLKASKSGNTDAMWPLHGFFLLP     | 872  |
| XP_014002096.2 [S. salar]         | HHSVRVNIVSPGSDQKAFLLDANPLVE-ALQPAKKFMSSPVGGSTLWRLPRLVLSLSP           | 878  |
| XP_041440458.1 [X. laevis]        | -----SWLSINIIISPTGSPKFCEVCVCKPENNI-LIPELVQFTMKFPMGMNGLTWLKLQSLCLLA   | 963  |
| XP_046764289.1 [G. gallus]        | -----SRQNVNLIKFGTNSSEDFSSFKNTSK-DLASLTFEFTTSATMTGMDLWKLTRYLSLFL      | 981  |
| EDL36193.1 [M. musculus]          | -----EEQKVNIIQGGTGYKELFSPYKCIOTD-----SKMATFEMSAAFSMGNTDFWKLRYLSLly   | 957  |
| NP_006428.2 [H. sapiens]          | -----EKQKVINI1QGGTGYKELFSPYKHITH-----NTMAAEFIMSATPTMGNTDFWKLTRYLSLly | 964  |
| NP_001125927.1 [P. abelii]        | -----EKQKVINI1QGGTGYKELFSPYKHITH-----NTMAAEFIMSATPTMGNTDFWKLTRYLSLly | 964  |
|                                   | ..*:. * . : : : : : * * * * : *                                      |      |
| XP_047129290.1 [H. vulgaris]      | CES-----TMKNVFLFSDGHI DEISTLARINRLKKNVRLTFPGVGTTPNKH                 | 1001 |
| XP_032828733.1 [P. marinus]       | GGV-----G-GSRDAAAPSVSVLLLTLDGVAQSEARATREARNVRLTLRVLCAGGETPNRY        | 1037 |
| XP_032219396.1 [N. vectensis]     | -----TADYPSVFLFTDGHVTEESTTLAYLRIDRLKTRTFVFGVGTTCNRH                  | 1064 |
| XP_019851276.1 [A. queenslandica] | EAASSSTGGTLNSTSLTLLFVGVYISDGHVTEESLTAISLKGAGVRYVTEFGVSTANRH          | 1051 |
| XP_019636962.1 [B. belcheri]      | PSP-----GKTNVNLI1DGHVWDAQPLTSDIHAHLETRVSPGCVGSTSNKH                  | 920  |
| XP_014002096.2 [S. salar]         | PSQ-----GV-RNLLLSDDGHVQNALTLQVLRQHAQSRLTFCGLSTANRH                   | 1045 |
| XP_041440458.1 [X. laevis]        | PSS-----GTMQNVLLISDGHQENNRVFLQILKNAGKVRLETCGVGATANRH                 | 1011 |
| XP_046764289.1 [G. gallus]        | PSQ-----GH-RNLLISDGHQENSVTFVQKSDRNVHTRTLCTCGVSTANRH                  | 1028 |
| EDL36193.1 [M. musculus]          | PSE-----GF-RNLLISDGHQESLTLQVVKRNIQHTRTFVTCVAGSTANRH                  | 1004 |
| NP_006428.2 [H. sapiens]          | PAR-----GS-RNLLISDGHQESLTLQVVKRNIQHTRTFVTCVAGSTANRH                  | 1004 |
| NP_001125927.1 [P. abelii]        | PAR-----GS-RNLLISDGHQESLTLQVVKRNIQHTRTFVTCVAGSTANRH                  | 1004 |
|                                   | .....* * : : : : : * : : : * * : *                                   |      |
| XP_047129290.1 [H. vulgaris]      | ILQKMACLSGSGYEYFDKNAKSKWKQKVELQLEKCCQPVLTNIKIHIHQHDEDA---PK          | 1057 |
| XP_032828733.1 [P. marinus]       | FLNALARNAGGAEFFFTKARNRSTDRMLALMEKATPVPCVRDTVWQQRFDAGLGDGRV           | 1023 |
| XP_032219396.1 [N. vectensis]     | FLRSMARVGGAGAYELFDFKSKSRWKERVKSLSKARQVDRVSTMVSTSELSITTGVLVHLQ        | 1194 |
| XP_019851276.1 [A. queenslandica] | PK FLRSMARVGGCGSEFFDSQKRSRWRKVEGLSKAFQALGTGVDVQWQHQHDEDA-----PP      | 1107 |
| XP_019636962.1 [B. belcheri]      | LLRAARVKGVEGKFDOTKTSKWRKVEGLSKAFQALGTGVDVQWQHQHDEDA-----PP           | 1107 |
| XP_014002096.2 [S. salar]         | MLLAQAGGAGAYEFFDTKTHKTRWEKVAQVRSIMSPGCSVSVYKQGFNPSA                  | 1071 |
| XP_041440458.1 [X. laevis]        | PMRLCLAQYGAGFEFFEDKSKNWEKIMEAQLEKMSNPACTSASVVKQGFSEND-----PE         | 1067 |
| XP_046764289.1 [G. gallus]        | MLRSLSGYAGAGFEYFDKSKSYNNAEKIQNVQSRISFVCKSSVYIKWQGFINDA-----PK        | 1084 |
| EDL36193.1 [M. musculus]          | ILRLTSLQCCGAGVEYFNNAKSKHSWKQIEAQQTRISFSPSCHSVYKWKQGLSRDA-----PE      | 1060 |
| NP_006428.2 [H. sapiens]          | VLRILSLQCCGAGVEYFNNAKSKHSWKQIEDQMTRLCSFSPSCHSVYKWKQGLNPDV-----PE     | 1067 |
| NP_001125927.1 [P. abelii]        | ILRLSLQCCGAGVEYFNNAKSKHSWKQIEDQMTRLCSFSPSCHSVYKWKQGLNPDG-----PE      | 1067 |
|                                   | ..* : : : * * * * : : : : : * : : : *                                |      |
| XP_047129290.1 [H. vulgaris]      | PLQAPNEITTTLPNGNRLLVYGVFPHCTMANLSALINLNGELNLTIVSTSELSTVTLTIHRL       | 1117 |
| XP_032828733.1 [P. marinus]       | EMQAPRMIRSVFCGTRLVYGVFPHCTQATLHAIIINNQEFTSMVSTSNLTQITRGMRLVHL        | 1184 |
| XP_032219396.1 [N. vectensis]     | PVQAPHDVISFNGSRQVYGVLDVNCQTQASLTAEVDRVSTMVSTSELSITTGVLVHLQ           | 1153 |
| XP_019851276.1 [A. queenslandica] | PIQAPKSIITSLFSGSRQVYGVFPHCTQASLRAIFGRKIEIQTMVSTSELDLTTSGTLLQHL       | 1107 |
| XP_019636962.1 [B. belcheri]      | PVQAPHQVSLFNGSRQVYGVFPHCTQATLKAIVNNRISITMVSTSELSITAGTLLIHL           | 1036 |
| XP_014002096.2 [S. salar]         | PVQAPQIHALFDLFIHLYGVFPHCTQATLLOGLSDQVSTSELTQITKTGTFHLK               | 1161 |
| XP_041440458.1 [X. laevis]        | PVQAPAHIPALFKNSSLVYGVFPHCTQAKIQLIDDKELDTMASTTELTQITKTGTMHLK          | 1127 |
| XP_046764289.1 [G. gallus]        | PMQAPAGIQLSLFNNRLLVYGVFPHCTQATLRAIINDQBLQTVSTTELTQITGTVLHLK          | 1144 |
| EDL36193.1 [M. musculus]          | PLQAPAMVPSLFFNNRLLVYGVFPHCTQATQAFIQKEKFTMVSTTELTQITGTGMHLK           | 1120 |
| NP_006428.2 [H. sapiens]          | ALQAPAGVSLFFNNRLLVYGVFPHCTQATLQALIQKEKFTMVSTTELTQITGTGMHLK           | 1127 |
| NP_001125927.1 [P. abelii]        | ALQAPAGVSLFFNNRLLVYGVFPHCTQATLQALIQKEKFTMVSTTELTQITGTGMHLK           | 1127 |
|                                   | **** : : * : : * : * * : * : * : * : * : * : * : *                   |      |
| XP_047129290.1 [H. vulgaris]      | AAKSVINDDNGMLHQQQKHEAIAKEMKGIQLISLEYISVTFKTSFIAVEERKEKNG             | 1176 |
| XP_032828733.1 [P. marinus]       | TAHAIIQDYEDGNLPHDQTEQHEVI1AEMKRSI1LISKEYSI1PTPYSFVAVERDSTLA          | 1243 |
| XP_032219396.1 [N. vectensis]     | TARAI1RDWEEGSLDPNHTKHEMAKRMKDPI1LSLKRFS1VSQFTSFVAIEHRKKDEKF          | 1213 |
| XP_019851276.1 [A. queenslandica] | TAQALI1RDWEEGSLDNDTHEIMKRLDTP1INTSKEYSI1VSQFTSFVAIEHRKKDEKF          | 1297 |
| XP_019636962.1 [B. belcheri]      | TARAVIRDDGTLIVDRTHETKMGMLKPKFI1LSKEYSI1VTFKTSFIAVEERKEQEDL           | 1026 |
| XP_014002096.2 [S. salar]         | TARAVIRDDGTLIVDRTHETKMGMLKPKFI1LSKEYSI1VTFKTSFIAVEERDSE-Q            | 1026 |
| XP_041440458.1 [X. laevis]        | TAQALIRDDGTLFHEHEHEHEMKQKTLKSI1LTSKYSI1VTFKTSFIAVEERKDAEK            | 1186 |
| XP_046764289.1 [G. gallus]        | TARAFIRDDGTLIHENETHEMKKQTLKXNMI1LTSKYSI1VTFKTSFIAVEERKDAE1           | 1203 |
| EDL36193.1 [M. musculus]          | AARALIRDDGTLIHDDENHEMKKINMKS1LITLKSNSI1TQFTSFVAVEKRDNEI1             | 1179 |
| NP_006428.2 [H. sapiens]          | AARALIRDDGTLIHENETHEMKKQTLKSI1LITLKSNSI1TQFTSFVAVEKRDENES            | 1186 |
| NP_001125927.1 [P. abelii]        | AARALIRDDGTLIHENETHEMKKQTLKSI1LITLKSNSI1TQFTSFVAVEKRDENES            | 1186 |
|                                   | **** : * : * : * : * : * : * : * : * : * : * : *                     |      |
| XP_047129290.1 [H. vulgaris]      | KDVTAPTINELVLMETVDILPYMGFEFTKTSVPMOKAR-----FSLSEILD-----             | 1222 |
| XP_032828733.1 [P. marinus]       | DEATGPALDELILSKESVDPLPYVWVEEKAARKKKGSMQF-----HLR-----                | 1286 |
| XP_032219396.1 [N. vectensis      |                                                                      |      |

|                                 |                                                                     |      |
|---------------------------------|---------------------------------------------------------------------|------|
| XP_032828733.1[P.marinus]       | -----ACFS-----                                                      | 1316 |
| XP_032219396.1[N.vectensis]     | ---KLFEACRSSESTETGTSASSTSSSESSSEELSDNSDSDWGS-----                   | 1444 |
| XP_019851276.1[A.queenslandica] | LESKLHLITRR-----RGKALKKD---IPPAEER--KASPKVPLKKK-----                | 1461 |
| XP_019636962.1[B.belcheri]      | -----QCN-----GNAS-----PADN-----ETSSSEWKAETDYEDMSCEMVT-----          | 1330 |
| XP_014020296.2[S.salar]         | -----QCN-----GNAS-----PADN-----DESWEGL-----NYSYLM-----              | 1310 |
| XP_041440458.1[X.laervis]       | -----FPGWKEN-----FCGKY-----                                         | 1234 |
| XP_046764289.1[G.gallus]        | -----GEFFY-----                                                     | 1245 |
| EDL36193.1[M.musculus]          | -----SSRLK-----                                                     | 1224 |
| NP_006428.2[H.sapiens]          | -----SSEWPEL-----RLSKRK-----                                        | 1239 |
| NP_001125927.1[P.abelii]        | -----SSEWQKL-----YSSKPK-----                                        | 1239 |
| XP_047129290.1[H.vulgaris]      | -----NDDSSLRQES-----EEKKKL-----                                     | 1256 |
| XP_032828733.1[P.marinus]       | -----LIPEKTEQTPEIEFGSAAER-----A-----                                | 1337 |
| XP_032219396.1[N.vectensis]     | -----EFYEDNIDDEV-YQDAVGEEEEEGEDDVY---GMCLEEAEEVERSE-----            | 1487 |
| XP_019851276.1[A.queenslandica] | -----KAVAK-----NRGPIREQESPEKDEDISVAEEGRRSIRMEEEPEEE-----            | 1502 |
| XP_019636962.1[B.belcheri]      | EIMTLGYSEGVMKAGKILD-----SSVELEEESEDEMEFGLFDQEGW-MAADEEKE-----       | 1383 |
| XP_014020296.2[S.salar]         | GSMVFGSPVTVSAA-TKPPDMLTKSEG-AVTDEEMECFNDMYFGLQE-SEH-----            | 1358 |
| XP_041440458.1[X.laervis]       | -----GGPVSV-----ERASLDEEEE-----S---LP-----                          | 1254 |
| XP_046764289.1[G.gallus]        | -----IPPFDAVLQ-----DSDAQSDCFTTKRCETE-----GLQLQPEDLT-----            | 1281 |
| EDL36193.1[M.musculus]          | H---NKL-----SD-----GHGVLQLSHS-----                                  | 1240 |
| NP_006428.2[H.sapiens]          | H---RKIPFSKRKM-----EL---SQPEVSEDFEED-----GLGVLPAFTS-----            | 1274 |
| NP_001125927.1[P.abelii]        | L---R---AKRKK---KL---SQPEVSEDFEED-----GLGVLPAFTS-----               | 1270 |
| XP_047129290.1[H.vulgaris]      | YKKPILLIDIGMAETKAGFAGCRAPKVVITLVGRPRHQGVVMGMGQKDAYVNEALSKRG-----    | 1316 |
| XP_032828733.1[P.marinus]       | NLSPPFEIAAAD-----TASQYPSSEIQPKFAHAS-----                            | 1366 |
| XP_032219396.1[N.vectensis]     | APTPLVIDVGSMMKVGFPAGDDAPKGVFFPIVGRPRHQGVVMGMGQKDSYVGEAHSKRG-----    | 1547 |
| XP_019851276.1[A.queenslandica] | DIPVAVIDTGMDTVKAGFAGDGRPSVFPALVGRPRHQGVVMGMGQKDSYVGEAKSKRG-----     | 1562 |
| XP_019636962.1[B.belcheri]      | ILAKPEM-----E---KKKVALLEKCSRLASPVMSRS-----AVATSTAYSPTSPTKLVA-----   | 1430 |
| XP_014020296.2[S.salar]         | PLRGSVI-----MHSEALTSFYSPTLHTI-----TGQSSTPVTPLYATKMLA-----           | 1400 |
| XP_041440458.1[X.laervis]       | -----FSFAPPPFDE-----EEE-----                                        | 1268 |
| XP_046764289.1[G.gallus]        | V-----TK-----ESISQ-----                                             | 1289 |
| EDL36193.1[M.musculus]          | PINLSEI-----PTI-H-----                                              | 1251 |
| NP_006428.2[H.sapiens]          | NLERGGV-----EKL-LDLSWTESCKPTA-----TEPLFKKVPWETST-----               | 1312 |
| NP_001125927.1[P.abelii]        | NLERGGV-----EKL-LDLSWTESCKPTA-----TEPLFKKVPWETST-----               | 1308 |
| XP_047129290.1[H.vulgaris]      | I--LTLSPFKLDKGSSETD--STKPLQLI-----GDTG--NIVKPE-----                 | 1351 |
| XP_032828733.1[P.marinus]       | --VEAVP-----CSNEGPNLSRRDV-----KDHGV--SASR-----                      | 1394 |
| XP_032219396.1[N.vectensis]     | I--LSLSTPQKREARPTPLQDRPPPPPLQDRPP-----FAMEGRA-----LTKDR-----        | 1590 |
| XP_019851276.1[A.queenslandica] | I--LTLKSPFERPSKPMAMSYSQPIVQVEEKE-----KESSATVEEDVNDLFGYDYG-----      | 1613 |
| XP_019636962.1[B.belcheri]      | YSVYSKPSPOKMAALKRAE-KELEAPRPETDEVTVDTLKASLDGIQAQRDLLEDLIEKSD-----   | 1489 |
| XP_014020296.2[S.salar]         | MTVETD-----                                                         | 1406 |
| XP_041440458.1[X.laervis]       | -----SL-----                                                        | 1270 |
| XP_046764289.1[G.gallus]        | -----                                                               | 1289 |
| EDL36193.1[M.musculus]          | -----                                                               | 1251 |
| NP_006428.2[H.sapiens]          | -----SS-----                                                        | 1314 |
| NP_001125927.1[P.abelii]        | -----SS-----                                                        | 1310 |
| XP_047129290.1[H.vulgaris]      | TSKAINPKFKIAKCKRE---LSKGLST-LQHSSVQQSI-----N-----                   | 1386 |
| XP_032828733.1[P.marinus]       | -ITMS-----ASSRFRGERHLLHRAAP-----V-----                              | 1416 |
| XP_032219396.1[N.vectensis]     | VIMPIE-EAPLDHTASI-----DLEE-----QEDL-----YVDMKGEV-----               | 1623 |
| XP_019851276.1[A.queenslandica] | RNYEIS-DFSMENYQVNEVLMDELEM-----DESL-----MEQSLM-----                 | 1649 |
| XP_019636962.1[B.belcheri]      | TLSAEAPVFFQASTAISEELFAATAEPTVHEATLVESKPAVLKRSKSGRA--PPKGARFVRE----- | 1547 |
| XP_014020296.2[S.salar]         | -----PIPELSETI-----QSLPEIVRHAKSRQGDFRADRHRK-----                    | 1440 |
| XP_041440458.1[X.laervis]       | -----IYN--SPAV--A-----                                              | 1278 |
| XP_046764289.1[G.gallus]        | -----EVIPQDYGPHDD-----                                              | 1302 |
| EDL36193.1[M.musculus]          | -----DSEPLLGLFKD-----                                               | 1262 |
| NP_006428.2[H.sapiens]          | -----FFPILAPAV-----GSYLPPTARAHS-----                                | 1335 |
| NP_001125927.1[P.abelii]        | -----LFGVSPFVV-----GSYLRPTAHAPR-----                                | 1331 |
| XP_047129290.1[H.vulgaris]      | IDSDSV---DYQK-----S---YIMLTQKQKCAEIEQTS-----                        | 1415 |
| XP_032828733.1[P.marinus]       | -----ILKEAFECRRS-----                                               | 1427 |
| XP_032219396.1[N.vectensis]     | LDDDLGFEAMCNAQKAA-----SL--AMGKRQRQDVQDLT-----                       | 1656 |
| XP_019851276.1[A.queenslandica] | VESAELYEELQOSEETIAVNQKELRSRKVKKSIPGTSPTSLKGLGSKEPQEGQLGTG-----      | 1709 |
| XP_019636962.1[B.belcheri]      | VEPEPVSEEVQASAPSAS-----RSAPAFGPIPPGAS-----FGKKS-----                | 1586 |
| XP_014020296.2[S.salar]         | VCADPAFDVTETQK--KSL-----SVA-DVPRPPPSVL-----QLKSCA-----              | 1476 |
| XP_041440458.1[X.laervis]       | -----F-----SFAPPPP--PPPL-----S-----                                 | 1291 |
| XP_046764289.1[G.gallus]        | -----I--ATV-----KFAAAMPFVPCPKPF-----VMSYCN-----                     | 1326 |
| EDL36193.1[M.musculus]          | -----LCSR-----MGFSCG-----                                           | 1273 |
| NP_006428.2[H.sapiens]          | -----PASLS-----FASYRQ-----                                          | 1346 |
| NP_001125927.1[P.abelii]        | -----AASMP-----FASYCQ-----                                          | 1342 |
| XP_047129290.1[H.vulgaris]      | --DFLSMQ-----SDNL-----                                              | 1425 |
| XP_032828733.1[P.marinus]       | -----QQFGSSAYAPRSV-----VHQLNSAET-----                               | 1450 |
| XP_032219396.1[N.vectensis]     | L-----DSYD-----P---I---HEVLPSNTQVATLDDT-----DD-----                 | 1681 |
| XP_019851276.1[A.queenslandica] | LAFGASKPREGYL-----SLDI-EGLAMPANKETYSLSQTYNPVSP-----                 | 1750 |
| XP_019636962.1[B.belcheri]      | ---GLVGGPPTTAEETKTKEVAFQGGFGSDAVSQAGFATPFAGAPPLDATPFAGPPFGA-----    | 1644 |
| XP_014020296.2[S.salar]         | VADALLPPAS-----VVGs-----PGPPPPPSVLSSPG-----                         | 1506 |
| XP_041440458.1[X.laervis]       | VAKT-----FDS-----PTPAVPFSPFAP--PP-----                              | 1311 |
| XP_046764289.1[G.gallus]        | TAPL-----FGS-----AVGAAYMTQKN--SF-----                               | 1346 |
| EDL36193.1[M.musculus]          | TA-F-----SGS-----FASSKDFDPGKFSQG-----                               | 1294 |
| NP_006428.2[H.sapiens]          | VA-S-----FGS-----AAPPRQFDASQFSQG-----                               | 1367 |
| NP_001125927.1[P.abelii]        | AA-S-----FGS-----AAPPRQFDAPQFSQS-----                               | 1363 |
| XP_047129290.1[H.vulgaris]      | -----MMDYCEMIASKES-----                                             | 1438 |
| XP_032828733.1[P.marinus]       | -----PVP-----LIRAQAFAP-----                                         | 1462 |
| XP_032219396.1[N.vectensis]     | -----MYVDMKN-----RATSSALKE-----RAVSYDI-----QDSLCEV-----             | 1711 |
| XP_019851276.1[A.queenslandica] | -----VYSPT-----SVTSPAYSP-----TSPSYSP-----SLPSYVPTCTSPAYNAP-----     | 1788 |
| XP_019636962.1[B.belcheri]      | PQFGAPQFGAAKTKTQEAQRFGSDAVSQAGGATPFAGAPPLGATPFAGPLGATPFAGAP-----    | 1704 |
| XP_014020296.2[S.salar]         | -----PPPS-----                                                      | 1510 |
| XP_041440458.1[X.laervis]       | -----PPP-----                                                       | 1314 |
| XP_046764289.1[G.gallus]        | -----PTT-----                                                       | 1349 |
| EDL36193.1[M.musculus]          | -----PNN-----                                                       | 1297 |
| NP_006428.2[H.sapiens]          | -----PVP-----                                                       | 1370 |
| NP_001125927.1[P.abelii]        | -----PAP-----                                                       | 1366 |
| XP_047129290.1[H.vulgaris]      | -----IYLESDSVK-----DIHQ-----                                        | 1451 |
| XP_032828733.1[P.marinus]       | -----AEDAVK-----                                                    | 1462 |
| XP_032219396.1[N.vectensis]     | TVNGKLSAPSVPLTFNRSSDKVS-----                                        | 1717 |
| XP_019851276.1[A.queenslandica] | QFGAAKIKTQEAAGQGFSSNAVSRGADVSTTPFGATSFGATPSIATPFPGTTFFASTISL-----   | 1812 |
| XP_019636962.1[B.belcheri]      | -----RLQS-----                                                      | 1764 |
| XP_014020296.2[S.salar]         | -----                                                               | 1514 |
| XP_041440458.1[X.laervis]       | -----                                                               | 1314 |
| XP_046764289.1[G.gallus]        | -----                                                               | 1349 |
| EDL36193.1[M.musculus]          | -----                                                               | 1297 |
| NP_006428.2[H.sapiens]          | -----                                                               | 1370 |
| NP_001125927.1[P.abelii]        | -----                                                               | 1366 |

|                                 |                                                                 |      |
|---------------------------------|-----------------------------------------------------------------|------|
| XP_047129290.1[H.vulgaris]      | FKL-----REKKSATPPPSST-RNV--SSLRKKQPFPEPMVS-----                 | 1485 |
| XP_032828733.1[P.marinus]       | -----L--TIFDNV-QPPG--VSLGVIAMETP-----SR                         | 1486 |
| XP_032219396.1[N.vectensis]     | -----EEEAEPIAIFGLDSCIARVS-----SS-EEKSSLYDEI--PSPNRPFFKKK        | 1761 |
| XP_019851276.1[A.queenslandica] | -----SDSSETSRNIIQLSSAYLGSGKS--RRFESVLSLEKSAPLSQPT--AAPPNSRSRIVR | 1864 |
| XP_019636962.1[B.belcheri]      | FGHSTTAAKEPEAALFGPASSATPSGGGFSFGSTS--SDIPLKDEDKSSVPIDSSKGLK     | 1822 |
| XP_014020296.2[S.salar]         | FSAAVSDALPPPPFAVFLSSGPPFPSRL-QSFSATV-----                       | 1549 |
| XP_041440458.1[X.laavis]        | -----FSAFPPPPPLA-L-----                                         | 1328 |
| XP_046764289.1[G.gallus]        | -----AL-ASSGAHLRLC-G-----                                       | 1362 |
| EDL36193.1[M.musculus]          | -----ISFSPKAPEMGVIL-H-----                                      | 1311 |
| NP_006428.2[H.sapiens]          | -----GTCADWIPQSASC-P-----                                       | 1384 |
| NP_001125927.1[P.abelii]        | -----GSCADWIPQSASC-P-----                                       | 1380 |
|                                 |                                                                 |      |
| XP_047129290.1[H.vulgaris]      | -----KV-----CLQAKMP-----                                        | 1494 |
| XP_032828733.1[P.marinus]       | FTPPYQDTFERGQARRQS-----                                         | 1504 |
| XP_032219396.1[N.vectensis]     | -----VA--NI-----PSPKPRPPFRASKI                                  | 1778 |
| XP_019851276.1[A.queenslandica] | -----FEAGALTFGSSSQAPLEP-----VPPPLPPRAVMT                        | 1895 |
| XP_019636962.1[B.belcheri]      | FGAPLEEKGGTTGFRFGGSSQAKMIQQGGFISHPQMQQQQQAQSNVPRDRIRPGRKAQS     | 1882 |
| XP_014020296.2[S.salar]         | -----                                                           | 1549 |
| XP_041440458.1[X.laavis]        | -----                                                           | 1328 |
| XP_046764289.1[G.gallus]        | -----                                                           | 1362 |
| EDL36193.1[M.musculus]          | -----                                                           | 1311 |
| NP_006428.2[H.sapiens]          | -----                                                           | 1384 |
| NP_001125927.1[P.abelii]        | -----                                                           | 1380 |
|                                 |                                                                 |      |
| XP_047129290.1[H.vulgaris]      | -----DLPMPPPQIMPL-----                                          | 1507 |
| XP_032828733.1[P.marinus]       | -----DRFT-----NSAY-----                                         | 1512 |
| XP_032219396.1[N.vectensis]     | --AA-----PPAPSLQAV-----                                         | 1789 |
| XP_019851276.1[A.queenslandica] | --KSAPSEPIYPSFDGIPAFSVRNAISSSPGSPPELTPWSS--PSFKSPPLPSAPL        | 1949 |
| XP_019636962.1[B.belcheri]      | ARKTTGGKALRPAADKVASDGVK-----ADSSPDTVVFMDESADKAKETKTPTSAKSPL     | 1935 |
| XP_014020296.2[S.salar]         | -----SDALPFTPPA-----                                            | 1559 |
| XP_041440458.1[X.laavis]        | -----G-----                                                     | 1329 |
| XP_046764289.1[G.gallus]        | -----Q-----                                                     | 1362 |
| EDL36193.1[M.musculus]          | -----T-----                                                     | 1312 |
| NP_006428.2[H.sapiens]          | -----T-----                                                     | 1385 |
| NP_001125927.1[P.abelii]        | -----T-----                                                     | 1381 |
|                                 |                                                                 |      |
| XP_047129290.1[H.vulgaris]      | FGAKQPSAEPMLLKACSPAKMPDLPMP--PPQ-----LMPLFGAKQPSAEPM---LLK-     | 1556 |
| XP_032828733.1[P.marinus]       | FF--KP---QKCL---ARVKKPPP-----LLC--FTARSFSSAALMPDVHEL            | 1550 |
| XP_032219396.1[N.vectensis]     | CI--DLPEPLKAGDSPLKRSVKAPLF-PPPPQQA---SRI---                     | 1829 |
| XP_019851276.1[A.queenslandica] | PG--GPPAKFSKSGRALMQSGGPPPPPPFTGT---APMQLSEKS-PPPPVPV---LRS      | 2001 |
| XP_019636962.1[B.belcheri]      | KM--IPATCCMVCYDMPLPYQQGSPPPP--PAPSRGPPPLPPTSQEQEPPIPPPPP        | 1984 |
| XP_014020296.2[S.salar]         | -----SVLSSPGPPPS-R-----LQSFSAITVDALPPPPPA                       | 1589 |
| XP_041440458.1[X.laavis]        | -----MPFSFAPPPPP-P-----PLALGMFSPFAPPPPPPP                       | 1359 |
| XP_046764289.1[G.gallus]        | -----SPVYSPPS-----PLVGMKYDNSFV-----                             | 1382 |
| EDL36193.1[M.musculus]          | -----SPFCSPPKPPS-A-----PPLVTNVLCS-                              | 1335 |
| NP_006428.2[H.sapiens]          | -----G--PPQNPPS-S-----PYCGIVFSGSSL-----                         | 1406 |
| NP_001125927.1[P.abelii]        | -----G--PPQNLSF-A-----PFCGIAFSGSSL-----                         | 1402 |
|                                 |                                                                 |      |
| XP_047129290.1[H.vulgaris]      | -----ACSPGKTSFFSQPPPPPAQSMYLFAGAKPLPEPTLSKD--CLPGKTSFFSQPP      | 1608 |
| XP_032828733.1[P.marinus]       | RAAGLM-----SRVPECAK--RDVCAQLP--NRDSPTD--FPEP                    | 1585 |
| XP_032219396.1[N.vectensis]     | -----YGAAPPAPSLQAVCID--LPEPLK--AGDSPKRSVKKPLP                   | 1867 |
| XP_019851276.1[A.queenslandica] | RDRGPMMPVQSTVSSGRPPPPPHFMLCGE--VPMS-----G-----GPP               | 2041 |
| XP_019636962.1[B.belcheri]      | -----CPAGPPLPAGAPPPPPQFRKSL--LALSQEKLGKSGQSPTMT--QPPP           | 2032 |
| XP_014020296.2[S.salar]         | -----FVLS-----SPGPPPSRLQ-SFS-----ATVSDA--LPP                    | 1615 |
| XP_041440458.1[X.laavis]        | -----LPAA-----KSH-STDEVY-SLD--VALL-----GAQQVSVC--APPP           | 1391 |
| XP_046764289.1[G.gallus]        | -----DH--IP-----                                                | 1386 |
| EDL36193.1[M.musculus]          | -----                                                           | 1335 |
| NP_006428.2[H.sapiens]          | -----SS--AQSA-----                                              | 1412 |
| NP_001125927.1[P.abelii]        | -----SP--TQLP-----                                              | 1408 |
|                                 |                                                                 |      |
| XP_047129290.1[H.vulgaris]      | PPPPAQ-SM---YLFGA-----KQPLPEPTLS-----KD                         | 1633 |
| XP_032828733.1[P.marinus]       | PRLPPP-----PPAQHASR--FGQP-----MHD-----                          | 1606 |
| XP_032219396.1[N.vectensis]     | PPPPQQAARDYRASYGAPPLPKRGGGPPLPKRGGGPPLFGAMALR--TGAPSKASKP       | 1925 |
| XP_019851276.1[A.queenslandica] | PPLPYLSRGIAQRRLPGGPPPP--PPPPPPGAAGAPLPGSSKVA--PKGKSKV--S        | 2091 |
| XP_019636962.1[B.belcheri]      | SRAPPP-----SMGRRPPPPSMGRRPPPPMTRAPPP-----NMARLRVDAD             | 2075 |
| XP_014020296.2[S.salar]         | --TPPA-----SVLSSPGPPPSRLQSFSDAVSDSLPPPSALVSNEFRAIKHKMRG--H      | 1664 |
| XP_041440458.1[X.laavis]        | PPPPPG-----SICA--PPPPGFCAP-----SPPAFDELLQV-----                 | 1422 |
| XP_046764289.1[G.gallus]        | -----N-----TIMF--GCASTYSSD-----KTNAEQV-----                     | 1409 |
| EDL36193.1[M.musculus]          | -----APQSYFLNL-----QSAAVHQS-----                                | 1352 |
| NP_006428.2[H.sapiens]          | PLQHGP-----GFTT--RPSAGTFFEL-----DSPQLHFSLPTDPD                  | 1446 |
| NP_001125927.1[P.abelii]        | PPQFPG-----GCTT--RPSAGTSPEL-----DSPQLHFSLPTDPD                  | 1442 |
|                                 |                                                                 |      |
| XP_047129290.1[H.vulgaris]      | CLPGLMGKKLAAPPAQSVSLFGSN-----KSSLMFSRNSCFSS-----                | 1672 |
| XP_032828733.1[P.marinus]       | -----DFQSSSTC-----                                              | 1613 |
| XP_032219396.1[N.vectensis]     | SFGGRGQPOVFAT--SASEILHPRLA--RTPSEL-----A-----                   | 1956 |
| XP_019851276.1[A.queenslandica] | YYAGLADKKT--T--QASPPSKAGGK--KEPSGP-----TGRGAL--LSSI-----        | 2129 |
| XP_019636962.1[B.belcheri]      | A-----L-----                                                    | 2077 |
| XP_014020296.2[S.salar]         | PKPGVGAI--SHT--ATFFKLQAGKD-LLLSKPREPYVELCETSKMWTVDNSLSEDKDC     | 1719 |
| XP_041440458.1[X.laavis]        | -----LEQ-----TQLAVS-----MIETE-----                              | 1436 |
| XP_046764289.1[G.gallus]        | -----T--HNSPVPQHKKTKLKAKYRKK-----MVTGL-----                     | 1436 |
| EDL36193.1[M.musculus]          | -----PNN-RVSEIIMES-----VESSL-----                               | 1369 |
| NP_006428.2[H.sapiens]          | PIRFGGSY--HPS--ASSPFHFQPSAASLTANLRLP-----MASAL-----             | 1483 |
| NP_001125927.1[P.abelii]        | PIRFGGSY--HLS--ASSPFHFQPSAASLTANLRLP-----IASAL-----             | 1479 |
|                                 |                                                                 |      |
| XP_047129290.1[H.vulgaris]      | -----DDL-----GMPKREE-----                                       | 1682 |
| XP_032828733.1[P.marinus]       | -----PKGVP-----SQ-----TNDEAP-----                               | 1614 |
| XP_032219396.1[N.vectensis]     | -----KKGVS--LQ--KYTVKKKEEKS-----                                | 1969 |
| XP_019851276.1[A.queenslandica] | -----YYVGLGETTKRMGARIGARIGARSLKKAELPKGEEEP-----                 | 2116 |
| XP_019636962.1[B.belcheri]      | GLVEMDHQPSVVPASVPPSGFSFGGRVSGSQSSQHHGSMFGDTAN--ACYIPGLFEASS     | 1777 |
| XP_014020296.2[S.salar]         | -----PE-----KAEHEGADFPVRPAR--KKKIYNTVEEP-----                   | 1464 |
| XP_041440458.1[X.laavis]        | -----P-----SDYSSRDA--SS-----                                    | 1436 |
| XP_046764289.1[G.gallus]        | -----P-----EALCSQSR--TTPVDLCLLEES-----                          | 1380 |
| EDL36193.1[M.musculus]          | -----P-----EALCSQSQ--TTPVDLCLLQES-----                          | 1504 |
| NP_006428.2[H.sapiens]          | -----P-----                                                     | 1500 |
| NP_001125927.1[P.abelii]        | -----P-----                                                     | 1500 |
|                                 |                                                                 |      |
| XP_047129290.1[H.vulgaris]      | -----HSLDLCDDL-----EMLADEKLSL-----DYRPAATG                      | 1709 |
| XP_032828733.1[P.marinus]       | -----AASRLCEESFPGSSNLS-----ESF-----SSED-----                    | 1639 |
| XP_032219396.1[N.vectensis]     | VFMSRLQLLESTR--AK-----KKTETDRED--I--MKQDSS-----                 | 2001 |
| XP_019851276.1[A.queenslandica] | VSASLMQALQSRK-----APEAFNLKLVDSYKWSVEMSDDD--SWDDDEEDDEGGGG       | 2200 |
| XP_019636962.1[B.belcheri]      | M-----EVEESPAICGEQVEESMDLKRLLKKKKVLELRAEFKKYESLPVDER--EE        | 2168 |
| XP_014020296.2[S.salar]         | A-----GSLFGPTLPYLGGSSGRSMGLS-----FEAPLT-----                    | 1805 |
| XP_041440458.1[X.laavis]        | M-----GRLGHSRRCVRGEEVA--LS-----QK-----                          | 1485 |
| XP_046764289.1[G.gallus]        | -----QDATASEQ-----E-----F-----                                  | 1446 |



|                                 |                                                               |      |
|---------------------------------|---------------------------------------------------------------|------|
| EDL36193.1[M.musculus]          | Y-----LALEGAEDSLGGSSF---ET-----D-----                         | 1400 |
| NP_006428.2[H.sapiens]          | V-----GSLEGRCPVFVAFQSS---DT-----E-----                        | 1524 |
| NP_001125927.1[P.abelii]        | V-----GSLEGRCPVFVFRSS---DT-----E-----                         | 1520 |
|                                 |                                                               |      |
| XP_047129290.1[H.vulgaris]      | TISACHFVKP-----ISCAYYE-PCF                                    | 1729 |
| XP_032828733.1[P.marinus]       | -----DYGMPF-----ESCIMFH---                                    | 1652 |
| XP_032219396.1[N.vectensis]     | --GEADILRREAHQH-----SMETEL-----EADRNEAMGVRPVPRKRGRKMLE-KK-    | 2046 |
| XP_019851276.1[A.queenslandica] | GGGRSRLLVNEFFAPQDQERAEKVVQQEEEEESDDNMAFGLPDSF--DEALSN-ASY     | 2257 |
| XP_019636962.1[B.belcheri]      | RDGRSLLNQIMRGTSL-----RGRPGAYHSASF                             | 2197 |
| XP_014020296.2[S.salar]         | -GGHLNSPLPTTHGFNLTH-----FLGASLGSSLFQ-SSL                      | 1838 |
| XP_041440458.1[X.laervis]       | -----RERAPPVF--NAL                                            | 1496 |
| XP_046764289.1[G.gallus]        | -----PERPKRLLPSCF                                             | 1459 |
| EDL36193.1[M.musculus]          | -----TDEAAFIANDLL                                             | 1413 |
| NP_006428.2[H.sapiens]          | -----SDELSEVLQDSCF                                            | 1537 |
| NP_001125927.1[P.abelii]        | -----SDELSEVLQDSRI                                            | 1533 |
|                                 |                                                               |      |
| XP_047129290.1[H.vulgaris]      | LERKKTSIENG-----LKSVDCCFFKDEKFERPFLDGRSFVFLNKTSNEDLINNTLEFL   | 1783 |
| XP_032828733.1[P.marinus]       | --TS-----PGVSLCGSSG-----SSEFSDTTPWQ--HADLSKI                  | 1682 |
| XP_032219396.1[N.vectensis]     | --AA-----EQK-----KEAMEEPS-----ESLQNRMRKWMATDKLLEL             | 2078 |
| XP_019851276.1[A.queenslandica] | YSMS-----ENA-----QESDGKVV-----IEVQNQF-PVINSSQIYMM             | 2290 |
| XP_019636962.1[B.belcheri]      | HPTS-----DSAGYPSGTETVVVPI-----VTRGSGSLTEKTVDQLFAL             | 2236 |
| XP_014020296.2[S.salar]         | RTLQQHHLVQAQKPLDIKKNIQKLVGDSER-REG-----LEFRKNLT--DVVKWTEI     | 1888 |
| XP_041440458.1[X.laervis]       | LDLQC-----EGSVCAPPPPIRFI-SVTP--PV-----ALSQKRGR--ALPAFNAL      | 1536 |
| XP_046764289.1[G.gallus]        | ITT-----EK-E-----RSQKLEL-----TPVMWEEI                         | 1481 |
| EDL36193.1[M.musculus]          | TSI-----E-TSSD-EBC-----AFCDDEQE--SPVFWASL                     | 1440 |
| NP_006428.2[H.sapiens]          | LQIKC-----DTKD--DSLCLFL-EVKE-EDE-----IVCIQHWQ--DAVPWTEL       | 1576 |
| NP_001125927.1[P.abelii]        | LQIKC-----DTKD--DSIPCFLE-VEIE-EDE-----IVCTQHWQ--DAVPWTEL      | 1572 |
|                                 |                                                               |      |
| XP_047129290.1[H.vulgaris]      | VENQHSDGYWELEDIFQDQOSTISFDILFVDVCRKLALSLCGEYSSEIQRLIATIIVCV   | 1843 |
| XP_032828733.1[P.marinus]       | TCLQNKDGSDGGVELSSL-VGWSPDH-ITVILKKQGIQSLGLRMEEAIVRLVMTLLVLQ   | 1740 |
| XP_032219396.1[N.vectensis]     | FASQHNDGYWSEK-ELEVA-FRI-DCSFLSRLLVNAGAQLGDEAFETILKMLTTIITLA   | 2135 |
| XP_019851276.1[A.queenslandica] | YSLQKDDGWSLLS-DLDTI-VMPGTGDRVLKVLNEAGAKSLGRVYKELSLIATCFVLR    | 2348 |
| XP_019636962.1[B.belcheri]      | LKHTDQSGYWEFSPELDQL-LGISSSTCVQ-IFNTAGLSLGAKVAKQLLVLATLLVLQ    | 2294 |
| XP_014020296.2[S.salar]         | FALQHSSEGYWECSASLGLS-LGVVDVYFANVFLKNRGISSLGVRRAHADLRLVASLLVLQ | 1947 |
| XP_041440458.1[X.laervis]       | LDLQCEEGYWLNLNEELGCL-LNMNVNYLIEVFLSKNGIQSLGKRGKDEVKLKIATLLVLQ | 1595 |
| XP_046764289.1[G.gallus]        | FDLQNGDGSWNLSPLGKI-LKFDVDYLINHFLIRNGIQSLGKRGKDEVKLKIATLLVLQ   | 1540 |
| EDL36193.1[M.musculus]          | FALQTENGFWKLTPELGLI-LNLNVNALL-TSLEEKGIRSLGTGRERLLDIATLLVLQ    | 1498 |
| NP_006428.2[H.sapiens]          | LSLQTEDGFWKLTPELGLI-LNLNTNGLH-SFLKQKGIQSLGVKGRECLLDLIATMLVLQ  | 1634 |
| NP_001125927.1[P.abelii]        | FSLQTEDGFWKLTPELGLI-LNLNTNALH-SFLKQKGIQSLGKGRERLLDIATMLVLQ    | 1630 |
|                                 |                                                               |      |
| XP_047129290.1[H.vulgaris]      | IFKLALSNDKALWSY--P-YHLRESNLKA-----SDKLTSAFFKGYSYLHEDCKFPSIHT  | 1896 |
| XP_032828733.1[P.marinus]       | ILRLRMGLASSINEFVLLLLRRDVSSTAELDMFMGSADAFARAASWIRSTESVCPVCVT   | 1800 |
| XP_032219396.1[N.vectensis]     | ILKTYLPDQFPVSLV--QQVSEGE--LV-----TSEWRNQVGRALSWLRKMDRKMPSVCS  | 2186 |
| XP_019851276.1[A.queenslandica] | LLNLNFPDAYKITFS--PHFEIDMSNGD-----PGDIATKMKNLSVLCKNLHKQNPVSVT  | 2401 |
| XP_019636962.1[B.belcheri]      | LIMLHLPLQFPSCSS--L-LHLDVMQVA-----AE-WRSAVQQVLAWAKGVDTHMPSVYS  | 2345 |
| XP_014020296.2[S.salar]         | LMRVRLLEEGKLLLS--L-FRLDLHSP--QPRCERWEAVRRAVDWVKWADREYPCVCS    | 2002 |
| XP_041440458.1[X.laervis]       | TI-CTYELVNVTFKN--L-MKLDESFT--SP---FYETIEKSMKWARCKDKQYPGICY    | 1645 |
| XP_046764289.1[G.gallus]        | FIRCANELQGIVFKS--L-MKLDNLTT--SGVHWAFESIKKATEWVKRTEGQYPSICY    | 1594 |
| EDL36193.1[M.musculus]          | FLYTKLEQEGMVAKS--L-IMDDAFIS---RNIPWAFENIKKAREWARKTEGQYPSICQ   | 1552 |
| NP_006428.2[H.sapiens]          | FIRTRLEKEGIVFKS--L-MKMDASIS---RNIPWAFENIKKASEWVRTEGQYPSICP    | 1688 |
| NP_001125927.1[P.abelii]        | FIRTRLEKEGIVFKS--L-MKMDPSIS---RNIPWAFENIKKASEWVRTEGQYPSICP    | 1684 |
|                                 |                                                               |      |
| XP_047129290.1[H.vulgaris]      | RLGLGYSLEEMTFQVYRLASQSFDKRMELRL-----                          | 1927 |
| XP_032828733.1[P.marinus]       | RLELGPNNQAAATCSLLGVA-----                                     | 1819 |
| XP_032219396.1[N.vectensis]     | RLELGPMDVVAAGIIDDKVHLMIGVR-----                               | 2213 |
| XP_019851276.1[A.queenslandica] | RLELGYSLIDAVDKILKL---CA-----                                  | 2421 |
| XP_019636962.1[B.belcheri]      | RLELGKSWDDLTKLIGVGVSLVHE-----                                 | 2370 |
| XP_014020296.2[S.salar]         | RLEFQWDMESSRQLLGTDPPHPLSLPLILGT--TGGVRAQ                      | 2041 |
| XP_041440458.1[X.laervis]       | RLGLGKDWDSATRKLLSIDPVDPSDLFFAVESVESIV--                       | 1684 |
| XP_046764289.1[G.gallus]        | RLELGKDWDSATKMLIGIKCN-----                                    | 1615 |
| EDL36193.1[M.musculus]          | RLELGKDWDSATKQLLGIQPOAN-TSLHRLIYYSQG----                      | 1587 |
| NP_006428.2[H.sapiens]          | RLELGNDWDSATKQLLGLPISTVSLPHRVLHYSQG----                       | 1724 |
| NP_001125927.1[P.abelii]        | RLELGKDWDSATKQLLGLQPVNTVSLPHRVLHYSQG----                      | 1720 |
|                                 | ** : * . : :                                                  |      |

### Percent identity matrix:

```
#
#
# Percent Identity Matrix - created by Clustal2.1
#
#
1: XP_047129290.1[H.vulgaris] 100.00 32.26 38.59 36.70 35.72 31.35 33.51 32.90 32.98 31.27 31.01
2: XP_032828733.1[P.marinus] 32.26 100.00 35.34 33.67 38.19 37.01 37.08 36.52 37.52 35.76 35.56
3: XP_032219396.1[N.vectensis] 38.59 35.34 100.00 40.86 39.21 34.87 34.69 35.85 35.81 33.82 33.88
4: XP_019851276.1[A.queenslandica] 36.70 33.67 40.86 100.00 37.82 33.09 35.17 34.30 34.63 31.77 31.83
5: XP_019636962.1[B.belcheri] 35.72 38.19 39.21 37.82 100.00 37.25 39.20 38.54 38.25 35.98 35.56
6: XP_014020296.2[S.salar] 31.35 37.01 34.87 33.09 37.25 100.00 41.80 43.30 41.68 40.36 39.81
7: XP_041440458.1[X.laevis] 33.51 37.08 34.69 35.17 39.20 41.80 100.00 48.16 47.33 47.32 46.94
8: XP_046764289.1[G.gallus] 32.90 36.52 35.85 34.30 38.54 43.30 48.16 100.00 52.14 53.34 53.41
9: EDL36193.1[M.musculus] 32.98 37.52 35.81 34.63 38.25 41.68 47.33 52.14 100.00 70.25 70.02
10: NP_006428.2[H.sapiens] 31.27 35.76 33.82 31.77 35.98 40.36 47.32 53.34 70.25 100.00 94.36
11: NP_001125927.1[P.abelii] 31.01 35.56 33.88 31.83 35.56 39.81 46.94 53.41 70.02 94.36 100.00
```
