# Supplementary material for: An Evolutionary Perspective on the Origin, Conservation and Binding Partner Acquisition of Tankyrases
Source: MDPI journal article supplement (doi:10.3390/biom12111688), 2022-11-15
Supplement: s1 [file s1]

# Notch2

## Homo sapiens:

>Q04721.3 NOTCH2\_HUMAN Neurogenic locus notch homolog protein 2 OS=Homo sapiens OX=9606 GN=NOTCH2 PE=1 SV=3  
MPALRPALLWALLALWLC AAPAHALQCRDGYEPCVNEGMCVITYHNGTGYCKCEPGEFLGEYQCQRHDPCEKNRCQNGGT CVAQAMLGKATCRCA SGFTGEDCQYSTSHPCFVSRPCLNGGTC HMLS RDTY  
ECTCQVGFTTGKECQWTDACL SHPCANGSTCTT VANQFSCCKLTGFTGQKCETDVNECDIPGHCGHG GTCLNLPGSYQCQCQPGFTGQYCD SLYVPCAPSPCVNGGTCRQTGDFTFE CNCLPGFEGSTCE  
RNIDDCPNHR CQNGGVCVDGVNTYNCRCPPQWTGQFCTEDVDECLLQPNACQNGGTCANRNGG YGCVCVNWSGDDCSENIDDCAFASCTPGSTCIDRVASFSCMCPEGAGLLCHLDDACISN PCHKG  
ALCDTNPLNGQYICTCPQGYKGADCTEDVDECAMANSNPCEHAGKCVNTDGA FHCECLKGYAGPRCEMDINECHSDP CQN DATCLDKIGGFTCLCMPGFKGVHCELEINECQSNPCVNNGQCVDKVNRF  
QCLCPGFTGPVQCIDIDDCSS TPC LINGAKC I DHPNGYECQCATGFTGVLCEENIDMCDPDPCHHGQ CQDGDISTYTCINPGYMGAI CSDQIDECYSSPC LNDGRC I DLVNGYQCNCQPGTSGVNC E IN  
FDDCASNP C I H G I C M D G I N R Y S C V C S P G F T G Q R C N I D I D E C A S N P C R K G A T C I N G V N G F R C I C P E G P H P F S C Y S Q V N E C L S N P C I H G N C T G G L S G Y K K C L D A G W V G I N C E V D K N E C L S N P C Q N G G T C D N  
LVNGYRCTCKKGFKGYNCQVNI DECA SNPCLNQGTCFDDISGYTCHCVLPYTGKNQCQTVLAPCS PNP CENAAVCKESPNFESY TCLCAPGWQ GQRCITIDI DECISKPCMNHGLCHNTQGSYMCCEPPGF  
SGMDCEEDIDDCLANPCQNGGSCMDGVNTFSCLCLPGFTGDKCQ TDMNECLSEPCKNNGTCS DVS YNSYTCCKQAGDFGVHCENNINECTESSCFNGGTCVDGINSFSC LCPVGTGSCFLHEINECSSH  
PCLNEGTCVDGLGTYRCS C P L G Y T G K N C Q T L V N L C S R S P C K N K G T C V Q K K A E S Q C L P S G W A G A Y C D V P N V S C D I A A S R R G V L V E H L C Q H S G V C I N A G N T H Y C C Q L P G Y T G S Y C E E Q L D E C A S N P C Q H G  
ATCSDFTIGGYRCECVPGYQGVNCEYEVDE CQNQPCQNGGTC I D L V N H F K C S C P P G T R G L L C E E N I D D C A R G P H C L N G G Q C M D R I G G Y S C R C L P G F A G E R C E G D I N E C L S N P C S S E G S L D C I Q L T N D Y L C  
VCRSAFTGRHCETFLVDVCQMPCLNGGTCAVASNM PDGFI CRCP P G F S G A R C Q S S C G Q V K C R K G E Q C V H T A S G P R C F C P S P R D C E S G A S S P C Q H G S C H P Q R P P P Y S C Q C A P P F S G S R C E L Y T A P P S  
TPPATCLSQYCADKARDGYCDEACNSHACQWDG GDCSLTMENPWANCSSPLPCWDYINNQCDEL CNTVECLDFNFECQGN SKTCKYDKYCADHFKDNHCDQGCNSEECGWDGLDCAADQPENLAEGTLV  
IVVLMPEQLLQDARSFLRALGTLTLHNLRIK RDSQ GELMVYPYGEKSAAMKQRMTRRSLPGEQE QEVAGSKVFLEIDNRQCVQDS DHCFKNTDAAAALLASHAIQGTLSYPLVS VVS E S L T P E R T Q  
L L Y L L A V A V V I I L F I L L G V I M A K R K R K H G S L W L P E G F T L R R D A S N H K **REFVEQCL**AVGLKNLSVQVSEANLIGTGTSEHWVDDEGPQPKKVAE D A L L S E E D D P I D R R P W T Q Q H L E A A D I R H T P S L A  
LTPPQAEQEV D V L D V N V R G P D G C T P L M L A S L R G G S S D L S D E D E D A E D S S A N I I T D L V Y Q G A S L Q A Q T D R T G E M A L H L A A R Y S R A D A A K R L L D A G A D A N A Q D N M G R C P L H A A V A A D A Q G V F Q I L I R N R V T  
D L D A R M N D G T T P L I L A A R L A V E G M V A E L I N C Q A D V N A V D D H G K S A L H W A A V N N V E A T L L L K N G A N R M D Q N K E E T P L F L A A R E G S Y E A A K I L L D H F A N R D I T D H M D R L P R D V A R D R M H D I V R L L D E  
Y N V T P S P P G T V L T S A L S P V I C G P N R S F L S L K H T P M G K S R R P S A K S T M P T S L P N L A K E A K D A K S R R K K S L S E K V Q L S E S S V T L S P V D S L E S P H T Y V S D T T S S M I T S P G L I Q A S P N P M L A T A A P P A P V  
H A Q H A L S F S N L H E M Q P L A H G A S T V L P S V Q L L S H H I V S P G S G A G S L S R L H P V P V P A D W M N R M E V N E T Q Y N E M F G M V L A P A E G T H P G I A P Q S R P P E G K H I T T P R E L P P I V T F Q L I P K G S I A Q P A G A P  
Q Q S T C P P A V A G P L P T M Y Q I P E M A R L P S V A F T T A M P P Q D G Q V A Q T I L P A Y H P P F A S V G K Y T P P S Q H S Y A S S N A A E R T P S H S G H L Q G E H P Y L T P S P E S P D Q W S S S P H S A S D W S D V T T S P T P G G A G G G  
Q R G P G T H M S E P P H N M Q V Y A

## Pongo abelii:

>XP\_009243797.2 neurogenic locus notch homolog protein 2 isoform X1 [Pongo abelii]  
MPAIRPALFWALLALWLC AAPARALQCRDGYEPCVNEGMCVITYHNGTGYCKCEPGEFLGEYQCQRHDPCEKNRCQNGGT CVAQAMLGKATCRCA SGFTGEDCQYSTSHPCFVSRPCLNGGTC HMLS RDTY  
ECTCQVGFTTGKECQWTDACL SHPCANGSTCTT VANQFSCCKCLPGFTGQKCETDVNECDIPGHCGHG GTCLNLPGSYQCQCQPGFTGQYCD SLYVPCAPSPCVNGGTCRQTGDFTFE CSCLPGFEGSTCE  
RNIDDCPNHR CQNGGVCVDGVNTYNCRCPPQWTGQFCTEDVDECLLQPNACQNGGTCANRNGG YGCVCVNWSGDDCSENIDDCAFASCTPGSTCIDRVASFSCMCPEGAGLLCHLDDACISN PCHKG  
ALCDTNPLNGQYICTCPQGYKGADCTEDVDECAMANSNPCEHAGKCVNTDGA FHCECLKGYAGPRCEMDINECHSDP CQN DATCLDKIGGFTCLCMPGFKGVHCELEINECQSNPCVNNGQCVDKVNRF  
QCLCPGFTGPVQCIDIDDCSS TPC LINGAKC I DHPNGYECQCATGFTGVLCEENIDMCDPDPCHHGQ CQDGDISTYTCINPGYMGAI CSDQIDECYSSPC LNDGRC I DLVNGYQCNCQPGTSGVNC E IN  
FDDCASNP C I H G I C M D G I N R Y S C V C S P G F T G Q R C N I D I D E C A S N P C R K G A T C I N G V N G F R C I C P E G P H P F S C Y S Q V N E C L S N P C I H G N C T G G L S G Y K K C L D A G I N G C E V D K N E C L S N P C Q N G G T C D N  
LVNGYRCTCKKGFKGYNCQVNI DECA SNPCLNQGTCFDDISGYTCHCVLPYTGKNQCQTVLAPCS PNP CENAAVCKESPNFESY TCLCAPGWQ GQRCITIDI DECISKPCMNHGLCHNTQGSYMCCEPPGF  
SGMDCEEDIDDCLANPCQNGGSCVDGVNAFSC LLLGFTGDKCQ TDMNECLSEPCKNNGTCS DVS YNSYTCCKQAGDFGVHCENNINECTESSCFNGGTCVDGINSFSC LCPVGTGSCFLHEINECSSH  
PCLNEGTCVDGLGTYRCS C P L G Y T G K N C Q T L V N L C S R S P C K N K G T C V Q K K A E S Q C L P S G W A G A Y C D V P N V S C D I A A S R R G V L V E H L C Q H S G V C I N A G N T H Y C C Q L P G Y T G S Y C E E Q L D E C V S N P C Q H G  
ATCSDFTIGGYRCECVPGYQGVNCEYEVDE CQNQPCQNGGTC I D L V N H F K C S C P P G T R G L L C E E N I D D C A R G P H C L N G G Q C M D R I G G Y S C R C L P G F A G E R C E G D I N E C L S N P C S S E G S L D C I Q L T N D Y L C  
VCRSAFTGRHCETFLVDVCQMPCLNGGTCAVASNM PDGFI CRCP P G F S G A R C Q S S C G Q V K C R K G E Q C V H T A S G P R C F C P S P R D C E S G A S S P C Q H G S C H P Q R P P P Y S C Q C A P P F S G S R C E L Y T A P P S  
TPPATCLSQYCADKARDGYCDEACNSHACQWDG GDCSLTMENPWANCSSPLPCWDYINNQCDEL CNTVECLDFNFECQGN SKTCKYDKYCADHFKDNHCDQGCNSEECGWDGLDCAADQPENLAEGTLV  
IVVLMPEQLLQDARSFLRALGTLTLHNLRIK RDSQ GELMVYPYGEKSAAMKQRMTRRSLPGEQE QEVAGSKVFLEIDNRQCVQDS DHCFKNTDAAAALLASHAIQGTLSYPLVS VVS E S L T P E R T Q  
L L Y L L A V A V V I I L F I L L G V I M A K R K R K H G S L W L P E G F T L R R D A S N H K **REFVEQCL**AVGLKNLSVQVSEANLIGTGTSEHWVDDEGPQPKKVAE D A L L S E E D D P I D R R P W T Q Q H L E A A D I R H T P S L A  
LTPPQAEQEV D V L D V N V R G P D G C T P L M L A S L R G G S S D L S D E D E D A E D S S A N I I T D L V Y Q G A S L Q A Q T D R T G E M A L H L A A R Y S R A D A A K R L L D A G A D A N A Q D N M G R C P L H A A V A A D A Q G V F Q I L I R N R V T  
D L D A R M N D G T T P L I L A A R L A V E G M V A E L I N C Q A D V N A V D D H G K S A L H W A A V N N V E A T L L L K N G A N R M D Q N K E E T P L F L A A R E G S Y E A A K I L L D H F A N R D I T D H M D R L P R D V A R D R M H D I V R L L D E  
Y N V T P S P P G T V L T S A L S P V I C G P N R S F L S L K H T P M G K S R R P S A K S T M P T S L P N L A K E A K D A K S R R K K S L S E K V Q L S E S S V T L S P V D S L E S P H T Y V S D T T S S M I T S P G L I Q A S P N P M L A T A A P P A P V  
H A Q H A L S F S N L H E M Q P L A H G A S T V L P S V Q L L S H H I V S P G S G A G S L S R L H P V P V P A D W M N R M E V N E T Q Y N E M F G M V L A P A E G T H P G I A P Q S R P P E G K H I T T P R E L P P I V T F Q L I P K G S I A Q P A G A P  
Q Q S T C P P A V A G P L P T M Y Q I P E M A R L P S V A F T T A M P P Q D G Q V A Q T I L P A Y H P P F A S M G K Y T P P S Q H S Y A S S N A A E R T P S H S G H L Q G E H P Y L T P S P E S P D Q W S S S P H S A S D W S D V T T S P T P G G A G G G  
Q R G P G T H M S E P P H N M Q V Y A

## Mus musculus:

>NP\_035058.2 neurogenic locus notch homolog protein 2 precursor [Mus musculus]  
MPALRPAARALLWLLWLCAGAPAHALQCRGGQEPVCNEGTCVITYHNGTGFCRCPEGLGEYQCQRHDPCEKNRCQNGGT CVPQGMGLKATCRCA PGTGEDCQYSTSHPCFVSRPCQNGGTC HMLS RDTY  
ECTCQVGFTGQKCQWTDACL SHPCENGSTCTSVASQFSCCKCPAGLTGQKCEADINNECDIPGRCQHGGTCLNLPGSYRCQCQPGFTGQHCDS PYPVPCAPSPCVNGGTCRQTGDFTFE CNCLPGFEGSTCE  
RNIDDCPNH K C Q N G G V C V D G V N T Y N C R C P P Q W T G Q F C T E D V D E C L L Q P N A C Q N G G T C T N R N G G Y G C V C V N W S G D D C S E N I D D C A Y A S C T P G S T C I D R V A S F S C L P E G K A G L L C H L D D A C I S N P C H K G  
ALCDTNPLNGQYICTCPQGYKGADCTEDVDECAMANSNPCEHAGKCVNTDGA FHCECLKGYAGPRCEMDINECHSDP CQN DATCLDKIGGFTCLCMPGFKGVHCELEINECQSNPCVNNGQCVDKVNRF  
QCLCPGFTGPVQCIDIDDCSS TPC LINGAKC I DHPNGYECQCATGFTGILCDENIDMCDPDPCHHGQ CQDGDISTYTCINPGYMGAI CSDQIDECYSSPC LNDGRC I DLVNGYQCNCQPGTSGNLCE IN  
FDDCASNP CMHG C V D G I N R Y S C V C S P G F T G Q R C N I D I D E C A S N P C R K G A T C I N G V N G F R C I C P E G P H P F S C Y S Q V N E C L S N P C I H G N C T G G L S G Y K K C L D A G I N G C E V D K N E C L S N P C Q N G G T C N N  
LVNGYRCTCKKGFKGYNCQVNI DECA SNPCLNQGTCFDDVSGYTGCHMPLYTGNKQCQTVLAPCS PNP CENAAVCKEAPNFESFSC LCAPGWQ GQRCITVDVDECISKPCMNNGVCHNTQGSYVCECP P G F  
SGMDCEEDIDDCLANPCQNGGSCVDHVN T F S C Q C H P G F I G D K C Q T D M N E C L S E P C K N G G T C S D V N S Y T C T C P A G F H G V H C E N N I D E C T E S S C F N G G T C V D G I N S F S C L C P V G T G P F C L H D I N E C S N  
PCLNAGTCVDGLGTYR C I C P L G Y T G K N C Q T L V N L C S R S P C K N K G T C V Q E K A R P H C L P P G W D G A Y C D V L N V S C K A A L Q K G V P V E H L C Q H S G I C I N A G N T H Y C C Q L P G Y T G S Y C E E Q L D E C A S N P C Q H G  
ATCNDFTIGGYRCECVPGYQGVNCEYEVDE CQNQPCQNGGTC I D L V N H F K C S C P P G T R G L L C E E N I D E C A G P H C L N G Q C V D R I G G Y T C R C L P G F A C E R C E G D I N E C L S N P C S S E G S L D C I Q L K N N Y N C  
ICRSAFTGRHCETFLVDVCQPKCLNGGTCAVASNM PDGFI CRCP P G F S G A R C Q S S C G Q V K C R R G E Q C I H T D S G P R C F C L N P K D C E S G C A S N P C Q H G G T C Y P Q R P P H Y S C R C P S P F G G S H C E L Y T A P T S  
TPPATCQSQYCADKARDGICDEACNSHACQWDG GDCSLTMDPWANCTSTLRWEYINNQCDEQCNTAECLDFNFECQRNSKTCKYDKYCADHFKDNHCDQGCNSEECGWDGLDCAADQPENLAEGTLI  
IVVLLPPEQLLQDSR S F L R A L G T L L H N L R I K R D S Q G A L M V Y P Y F G E K S A A M K Q K M T R R S L P E E Q E Q E V I G S K I F L E I D N R Q C V Q D S D Q C F K N T D A A A L L A S H A I Q G T L S Y P L V S V F S E L S P R N  
A Q L L Y L L A V A V V I I L F I L L G V I M A K R K R K H G F L W L P E G F T L R R D S S N H K **REFVEQCL**AVGLKNLSVQVSEANLIGSGTSEHWVDDEGPQPKKA E D A L L S E E D D P I D R R P W T Q Q H L E A A D I R H T P S L  
ALTTPPQAEQEV D V L D V N V R G P D G C T P L M L A S L R G G S S D L S D E D E D A E D S S A N I I T D L V Y Q G A S L Q A Q T D R T G E M A L H L A A R Y S R A D A A K R L L D A G A D A N A Q D N M G R C P L H A A V A A D A Q G V F Q I L I R N R V T  
D L D A R M N D G T T P L I L A A R L A V E G M V A E L I N C Q A D V N A V D D H G K S A L H W A A V N N V E A T L L L K N G A N R M D Q N K E E T P L F L A A R E G S Y E A A K I L L D H F A N R D I T D H M D R L P R D V A R D R M H D I V R L L D E  
Y N V T P S P P G T V L T S A L S P V I C G P N R S F L S L K H T P M G K K A R R P N T K S T M P T S L P N L A K E A K D A K S R R K K L S E K V Q L S E S S V T L S P V D S L E S P H T Y V S D T T S P G L I Q A S P T P L A A A P A A P  
V H T Q H A L S F S N L H D M Q P L A P A G A S T V L P S V Q L L S H H I A P P G S S A G S L G R L H P V P V P A D W M N R M E V N E T Q Y S E M F G M V L A P A E G A H P G I A A P Q S R P P E G K H M S T Q R E P L P P I V T F Q L I P K G S I A Q A A G  
A P Q T Q S S C P P A V A G P L P S M Y Q I P E M P R L P S V A F P P T M M Q Q E G G V A Q T I V T Y T H P P F A S V G K Y T P P S Q H S Y A S S N A A E R T P S H G H L Q G E H P Y L T P S P E S P D Q W S S S P H S A S D W S D V T T S P T P G G G G  
G Q R G P G T H M S E P P H S N M Q V Y A

## Gallus gallus:

>NP\_001238962.2 neurogenic locus notch homolog protein 2 precursor [Gallus gallus]  
MARGAGAFALFGLVLAVLSRAEPAAALQCMDDSKPCVNEGKCIYPQNGTGYCKREGLDYGCYQRPNESNTCKNGGTCETTSLIGKATCKCAPGFTGEDCQYSESHICYVSQ PCLNGGTC HPHSQ  
ETNEVCVCPGYTGKDCQWTDAC T G Q P C A N G S T C T V S G H K F S C I C Q S G Y T G Q K C I D V N E C A T S G L C H H G G T C I N L P G S F R C Q C K P G Y T G H R C E S N Y V P C S P S P C M N G G T C H Q T S D F T F E C N C L P G F E G S T C E  
ICEKNYDCPNHNCQNGGTCVDGVNTYNCRCPPQWTGQFCTEDVDE CQLQPNACQNGGTC T N H N G Y A C V C V N W S G D D C S K N I D D C T A S C A N G S T C I D R V A S F S C I C P E G K A G L L C H L D D A C V S N P C  
QKGA L C D T P N V N G H Y I C T C P Q C H K G A D C T E D V D E C A M A N S N P C E H A G K C V N T E D S F G H C E C L K G Y T P R C E M D I N E C H S N P C Q N D A T C L D K I G G F T C L C M P G F K G V H C E B D I D E C L S N P C V N N G C E L D K V  
N R F L C S C P P F S G A V Q C I D I D D C S T P C L N G A K C I D H P N G Y E C Q C A T G F T G V L C E E N I D M C D P D P C H H G Q C Q D G I D S Y T C I N P G Y M G A I C S E Q I N E C H S N P C S S E G S L D C I Q L K N N Y N C  
ENNFDCCASNPCVHGDCIDGINRYNCA CKPGFTGPRCNVDIDE CASSPCNNGGTCINEVNGFRVCPEGYHHPCQSGADGCLSNPCVHGNC THIVSGYKVCVDPGWIGDYCSTEGNECKSNPCQNGGT  
CEDILLNGYRCTCRKGFKGYNCQVVAPCS P D P C E N S G I Q E S P D S E G Y T C C A P G W E G E R C T V D I D E C L S K P C N A L H C N I Q G S Y L C E C R P G T T G G C D S N I D D C L S N P C Q N G A S C V D G I N S F C I C L  
P G F H G D K Q C T D N E C L S E P C R N G G T C T H V N S Y T C K Q C P G F E G T N C E N N I D E C T E S S C F N G G T C V D G I N S T C Q C P V G T G P F C L M E I N E C D S H P C L N K G S C V S L D K Y N C I P L G Y T G S R C E Q T P M D L C  
S C S P C K N K G T C F Q S G A Q T R C D C P S G W T G A Y C D V P N V S C Q V A A S Q R G I T V D Q L C Q H S H C L N V N T H R C Q R V G Y T G S Y C E E Q L D E C D S S P C Q N G A T C R H L L G G Y Q C E C V P G Y Q G V N C E Y E V D E C Q F C P C  
Q N G T C I D L V N H F R C S C P P G T R G L E N A V D D C I S E S G G R P C F N G G Q C I D Q I G G Y S C L C L P G F A G E R C E G D I N E C L S N P C N P R G S L D C I Q L I N D Y T C I C R S A F T G R H C E S V I D V C P R K P C Q N G G T C A V A  
S N M P D G F I C Q C P P G Y S A K C E F S S H S T C G Q V K K K G E Q C I H T S S G P R C Y C P R L A V G E E Q C T N T G C A S A P C Q N G S S C H P R S Q P P Y Y C Q C P A H A G S C Q E Q L V H P S Q E P L G C L D S Q C A E K A R D Y G C D E D C

NTHACQWDGDCSLTMEDPWANCSSSLRCWMLFNGQCDEFNTPCECLFDNFECQQNSRMCKYDKYCADHYGDGRCDQGCNSEECGWDGLDCAGDKAERLAEGTLIIIVLMRPPDELLDRDVSFLRTLGTLLHTNLRILKLDSSQGNPMVFPYYEGKSAARSSRVVVVRKHRELEQEVILGTRVFLIEDNRQCAEDSEQFHNTAAALAAQAIKGMLPYFPFVSQSEPLLPKTKQLLYLLAVALIILLILLGVMMAKRRKHGSLWLPPEGFIILRRPDSNH**REFPVQGL**AVGLKNLSVQIPEGNMADSGPTEHWAGDGGGPKRKRVTEDQALLPEADEQIDQRQWTOQHLEAADVCGSTSLATLPQADQEVVDLVNNVGRPDGCTPLMLASLRVSGSDISEDDGEDSSANITIDLIIYQGANLQAQTDRTGEMALHLAARYSRADAARLLDAGADANARDNMGRTPLHAAVAADAQGVFQJILIRNRVITDLDRMADGTEFPLILAAARLAVEGMVAELINCQADVNAVDDHGKSALHWAAAVNNVEATLVLLKNGANRDMQDNKEETPLFLAAREGSFEAAKILLDHFANRDTIDHMDRLPRDVAQDRMHHDIVQLLNEYNVAHSPTGHGPAMLNSALSPVICGPNRSFLNLKHASLSKKSRRKPNAGIMPTNLTKDAKRRRKKSLSESKGQFSESSVTLSPVDSLESPLHAFASEPTSSPMPSPGVLHSSPSSLTAPSVQAAHSMSPSNLHMQLPGRGSSVTLPSPVSQQLSQHRTTTPSSGLGRLPANVSTEWNNRMEMNESQYNEMFGMVPVVMHSHSPVSQSQGLVQADTKHLGVSRSEPTSPMITPQLVPKGINQQALPQQAQSNCAQNMAGPLSSSMYQISDLAQLPSASFMAAIPQQDGQVPQTILPAYHQFQSSGMKYPTPPSQHSYSSATERTPSHNRHLQGEHPYLTSPSPESPDQWSSSSPHSASDWSDVATSPGNINQRGPAAAHVPEQQRNNMQVYA

**Xenopus laevis:**

>XP\_018114267.1 neurogenic locus notch homolog protein 2 isoform X1 [Xenopus laevis]  
MGVQAVFGLCVLLGMPCCDGLQCRGASEPCLNEGRCITSDDGSAYCKCPDAFVGVEYQCLQNPQJETVCLNNGGSKCVSPDLSKGVCTCAPFGSGENCKQPVASVCSLTQPCMNNGGTCRLLTLEHYECICPFGWRGKDCEFIDACASQPCANGSTCLPNEQNQYSCTCQAGYTLGKCEMDVNECTSPGLCKNGGTCENLPGSRYCQCHPGYIGORCESPFIPCSFSPCMNGGTCRQTSEFAYECNCLPFGDGKNCESNIDDCPSHHKQNGGTCVDGVNTYRCNCPFPQWTGQFCETEDVDECLLQPNACQNGGTCITNSNGYCNVCVNGWSGDDCQNIIDDCATAACANGSTCIDRVASFICVCPPEGKIGILLCHKNDACFSNPCIHGISLCDTNPLTGAICTCPCPGYKGTACTEIDECSLVNSPCEHAGKCVNTEGSFYCECSKSGTGPCEMDINECLSEPCNDCTCLDKIGGFTCLCMPGYKGIHCEIHEVEDECLSNPCVNNVGVCDVKNRNVFCICPPGTFPGVQCIDIDDDCSSTPQNQAGKCVDPHAGFYDCLCATGFTGLVCEENINCEPFPCHYQCDQIGDSYTCICEFPGMGAICSDQIDECHSNPCLNEGRCVLDVNGQCNCLPSTGSPRCKENVDDCASNPCTGKNCVDGNIIRDVCVSPGFTGPQCKDDIDECASSPCHNGGTCVNEQNRFRCICEPFGRPQSPCFSQVDECVNPNCIHGNCITDDEVNGYKCLCQPGWNGKCEVDRNECLSDPCQNGGTCDDLVNGYRCSCKTKYGNKQCIDTNECASPNCLNHGTCRDGINGYTHCHALPYTGTRNCQNIILTPCSPEPCHNGGICQSESDFKFSFSLCATGWQQRCTIDVDECVNTPNCRNYGRCTNRTGGYKXCHCPCDFGSGFNCENNIDDCLSNFCQNGASCLDGINTFSCNCLAGFHGDKQQRDVBECASNPKCNGGSCITYDINSYTCCKQCPGFDGICHDNNIDECTDTSCFNATGCTVDGVNSFSCQCPQGTGPFCLFEINECGSHPCINGGTCVDGMGTGTHCTCPIGYRGKNCEVLDLNCQADVNAVDDHGKSALHWAAAVNNVEATVLLKNGANRDMQDNKEETPLFLAAREGSFEAAKMLLDYFANREITDHDMDRLPRDIAKDRMHHDIVRLLEDEYNLHNSLTGQGPGLSMNLSLPSQSGNSRSLNLKHAAQAKKTRRPSAKNVGRCPNLPLNAKEPKDTKNRRRKKSDTDNKGQLESSESVTLSPVDSLESPLHAFASEPTSSPMTPLTSPGTLTSPGQMHAATSTLQPPHTTMSMTNLSTIGCAANNMLPSVQGLLSQAQNNVLDAQORQLNLLSSDWLSRMERNNITQYNEMFGLVHHDTNNHSCIQNGIMQADIKPTLHMGVARDALPITMTFQLIPKSGMMQQTLLVQQTSHAQNVAGMYQMPDRARITGSSVPIAMMHQHDGQLSQTMLTSYHPLQNPMGKYPTPPSQHSYASTDKTPNNHNGHLPEGHPYLTSPSPESPDQWSSSSPNSASDWSDVTTSTPTNGSQRMFATHMFEQSHNGMQVYA

**Salmo salar:**

>XP\_014025097.1 neurogenic locus notch homolog protein 2-like isoform X3 [Salmo salar]  
MGQLPVFSSGKVLVIVVCCVRLSLALQCLDIAVKPCVNNATCATFTNGTGYCRCAAGFLGDYCHKHDKPCHPGYCLNNGNCVAVSGIPGSPSTCSCPLGYTGHCQCTPQNSTCYPNPNCANQGVCTLLSLDKYKQCAHNGTGMRCNREDSCLSGPCANGGTCSSPPGGKFGCTCPPGYLGPRLCNDTDECAASAPVCQNGRCVNTPGSYRCNCAPEGFTGRQCBETPYIPCSFSPCLNNGGTCRPTSETSYWCHCLPGFNGTNCENIIDDCPDHGCNRNGTCMDGVNTYNCQCPPEWTGQFCTEDVDECLRLQNPCTQNGGTCINSQGSYTCVVCVNGWSGLDCSENIIDDCATAACTKGSTCIDRVASFICVCPYKGTGLLCHVNDACISSPCRDGAQCDTNPIINGMFCNCAFPYIGSTCNDVDNECIIIPNPCEHHGSCVNTDGSFTCNCAQGDYGRCEITINEACSSPCQNDGTCDLRIDYDYSICIMEGFEHTHCEIDINECASSPCNLNGQCTCLDQVKRYVCWCPGLFGSGEMQCIDIDECSSSTPCNLNGAKCIDRPNGYECECAEGFSGLCENIIDDCDPEPCHHGVCRDGIATFSCDDCPGYTGSCINVQVMECHSNPCQNGRCIDLVNMYQCNCLPGTSGVNCERNVDDCASNPCEYEQCDQGINEXYKVCAPGYTGAKCDVDIHCNSSPCMSGSGCTVDKXNGEIQCCPPTHGFLCHSGTIDHCAQPQCVPHGDCVQSQSGRYNCECCSGWVGQHCDCQSSQSSPQHSKCSVDRLNGYCGSCQRPGFTGVCNEECASSPCENHGTCTVDGVNTYSLCLDPFYSKGHCHEELYPGASHPHCEYGGVCQTPDYTYFTRCPRGQGRCTEDVDECKNRQCNKRCINQSGVYKCRPGYSGLNCQITIIDDCSPNPLCNGGSCVDVEVGGSFSCDRQGFDFGERCEAEVDECASQPCQNGAVCRDYNVSFVCVCRPGFDGILCEHNIPECTESSCLNNGTCVDDINTFSRCRCPFGYGTFCFCEYQNECDSQPCKNNGTCITDGLGSYRCTCPVYNGNQCNQNFVNLCSQPLCQNGGSCSQSETTWLCKHPVGTGMYDDVPNMSQDYAARNQIQVELVCKHSGRCVNVNQAHHQCLPGYTGSGYCNEMVEDCLSNPCRNAGATMDQYGTCECMCKAGYQVNCHEYDVDECHSNPCHHGCTCINLIRNFASCAPPGTNGVNDCAAPKPGSWELRCLNNGGQVDGVGRYTCNCPGFAHGGGCVNCLSGHSCPSGLDCVQLANDYQCRCLRGYTGHRHCSMVDLQSKPCHNSGTCSMNMSVHYGTICIQPGFTGFNCEVEBVGYNCAKLRQCNQNGHCQETQVGRPHRCRQCPGFSGPRCETVHSQCNRPCLNNGGTCMKDPHYQYSCHCAHFSGRHNEGVIDFDPSPSTAPCEPYVECEQHSQGDVCPQCNSHCEQWDGDCSLHWRQPVWNCTAPVPWEFLFNRGRCDPDCDNSGCLFDSFCEQESAQSYCKYDKYCAAHYANKIKDKGCNTEACGWDLGDCSGDTPAEVAADGTILVIVLLQPEELMGDMRGFLRSLGTLHTNLNRVKMDDQKQPMPLYPPYLEHDDNGEGQPTMTLRKRELDKKEIVISGVLYLEIDNRKCSERSMDCSFSTELAASFIAEAYLEKSELPYPVSVSNPDTEPYKFNFLLYLAVGAAMIIILLIIVLGVLAARKRRKHGVLWLPDGLFLAKDD**REFPVQGL**DFGMKNKFTQDGGMIDGGQRMEEEAAPKKVTRTEDKPLPMGVDCGVDRREITLQHHKAADISLTTPQTDLEADCLDVNVKPGDGTPLMLASLRNGGASDCGLQAEEEEEESGGDEPCPNAISDLITQGATLMAQTDRTGETALHLAARYARADAARLLDAGADANAHNDMGRTPLHAAVAADAGQGVFQJILIRNRATELDARMNDGTPPLILAAARLAVEGMVEELVHCHADINAVDDHGKSALHWAAAVNNVEATLVLLKNGANRDMQDNKEETPLFLAAREGSFEAAQLLDHYSNRDTIDHLDRLPRDTAQERMHHDIVRLLDQYNLVHSPHNGFNMGHGHSLVCGNGAGYMGMRPGQKKRSRGAAGVGGVAGTAQQLKMDKAKRRKKTPGTGEGPAGVGASGNGTKAAGGLLESPLMSPVDSLESPLIYFGDAAGASAKTTNSPLLGSPPSRPLLPVPSHMLGQQQSWGLKHGYGGHMFSLLPQQMGSGHPSMSQHHQGGLLTPMNVMTSREQLPPIVTFQMMAPEGGQALLKQPGQGVQSQQQGQPGQSQQQGPTHLCGPCQMLYQMPNVSLQHSLSLGHPLHAGVMVDGQSRQQLPPYQAMQSFVVKYPTPPSQHSYATAGSETTTPGPAHPSHHPYLTSPSPESPDQWSSSSPHSNSDWSDVTTSTPTPLGNHALPPLHHTHIEQLQPGSQQTQQNFPQQRGNMQVFA

**Petromyzon marinus:**

>XP\_032815028.1 neurogenic locus notch homolog protein 1-like isoform X1 [Petromyzon marinus]  
MEPFLALPILLRLLLLLALGARISRGLCQQDSNQPCINGGTCTCFANGTGIKCKQHNFVGIYQCLDNHCASSPCQNGGTCSTVVRGGVPDYACEPLGFMDPVCLITPADNACLGVPCHNNGGTCRLLSLHRFECHELLGWSGCTEKADPCASNPCAQHGSCRAVGSRYACACRPGFSGMCRNADTDECAASPCNRNGGSCAVNPVGSYACACPAAYTGRHCETAYVFCAPSPLNNGGTCRGTGDTAYDCSLCPGFGEGRDCNVNDDCPGNRCNDGATCVDGVNTYNCQSPQWTGYCTEDVDECLQLPACNLNGGTCNHTHGGYCNVCVNGWGTDCENIIDCAIACFNAGTACHDRVSLFGCTPGKLTGLLCHLDDACSDPCHEGAICTDNPINGKAICTCRAGFTGGACNQDVDECSIGANPCEHGGRCINTQGSFRNQCQTAGTTPGRCETDINECNSMPLCNDATCLDKIGEFTCICMPGFEGRHCEIDINECGSGPCLNDGNCTDHVNGFLRCRPPFGTGMQCIDMDECASTPCNLGAKCVDRPNAYSCETEGFAGLVCELVNNECQDPDCHHGKGVGDIASFYCVCSFGPYTGFLCDSQLNECQSSPGWKGKCVLDVNRHYHCTEGVNCETNFDGAGELCQRGKCVDGVNEYRCLDAGYTGLOCDVELNECESSPCHNGGSCCKLDVADAFCEVCLPGFHGFLCYSETDACYASPCLHGTCLDHGESYRACAEAGWTGPLCEVIDIECESSPGQNGGACQEHDDGYTCRCRDGKFGKTCQKNRYECVSNPCNLNRGTCVDGVAGYTCLTDLPTFGRNCEAVMAPACQSPCHNAATCYCSESVNLSFSFCACPPGWRGATGCLDIDECAGAPCGQGGACMNTGGFRCSRCPGYTGPTCQTDIDDCSPNCPQNGSGCTDGVGAFSCKCRGFERGSRCETEVNECASNPCKNRNGGSCADYNSYTCRCRPFNGIHCEHDIETCTDSSCLNGGSCVDGINATYCLCRGGFTGSVCYQFDIECESQPQCQHGCTCLDGLGTKYCTCRPGTYKNGQALVDWCSSSPCKNSGSCVQSRSTSYRDCSHGWTGLYCDIPNMSDCDIAARNKGLSVSHLCRHGGRCIDAGNTHQCTCRGFGESYCEKEVDECTSNPNCGATCRNFLSGYKCECPVGYHGLNCDYEINECLSQPCQNGGKCIDLVRNFCVCPPGTQGILCEINTDDCNPGDPAMPGPRCFNGGSCVDGVGSFTCSCPPGFGVGERCEGDVNECLSNPCDPRGSLDCIQLVNDYKQCRPGFTGHNCEVVINTCRLEPCRNNGTCMITVNTLLGTCLCAPGYAGHACEDNAYACGNLSCRNGGTCLPDRAAGPLCVCPRAWRGPEQYHSGGGGSSACASSPCENGAACYEEVVRPFYRCVCPPLFTGPRCVRVLGPKVPGDASSGRALPVPPVPLEESCPVAECESHAGDGLCDRDCNNHACAWDGGDCSLHFPSPWRNCSVRLQCWLRFRNGECEQCNLSLGLCDFDQGLGMKNCNPLYNAYCTAHYADQHCDDQGCNSDECWDDGGDCAGEVERLADGVLLIMLPLPARVHNSANFLRQLGSLLHATVRFKIDTNGQDMIFFYYGDEARGGGPRLERAAARSLSRFVREMERPLIGSKVYVEIDNRHCYQTSDRCFSSAAADAAFLAAQATHGSLPLPLLGVSSSEVPDVVTAAPRVQVYVLLGLVLLVLMVVVLLGLVLRKRRREOGTLWFFPEGFILGPPSDKK**REFPVQGL**DVGMTLLSQSSVEDSLIDGNQNEAWLDGSPVTKRRKLEEQMLPEAEFEPVDRHWTQQLHEAADIRTAPALVIALTPPQGEADDGMVNRHOGTPTPLMVASFHGGGLDSSLDBEESSDGLFEDGTDDGASANVITDLICQGAALHAQTDRTGETALHLAARYARSDAARLLDAGADANLCPDNMGRSPLHAASVADAGQGVFQJILIRNRATDVDMVNRHGTTPPLILAAARLAVEGMAEELINCHADVNVKVDLGRKSLHWAAAVNNVEATLVLLKNGANKDMQDNKEETPLFLAAREGSYETAKLLLDHFASRDITDHDVRLPRDIAQERLHHDIVRLLEYNVVRNPSGPNGLASPPQANGAYAHGAKAGKGVRRPGNKSGVAHDAACKKCAQKKNVNGVASGGGSDGAPLLGLDGSASLSPVNSESSQSGDGTSPSLTSPHVAHSLYASMEAVGCGPPRVGHPMAFRNGAIAVASGWINPMQNVPLSQGTTHQGHSGLTSSHPQSNHRAMSSPLHPAMINQHQMILAFOQNNLYSRNPKLMEAPQHHPPEARAGGAFFQSGKMPMIQFSNQLAASQSQLLASVSGNFPPLSQQQHQIAPVQMOSFVGSEGFESFASNDYKPNKESHQSCTVLQTPVPPPEQANVSQSSQLAKREGAAPAEQFPTTPSQHSRSGSGPHAPPFTGEPHYLTSPPETPERWSTCSPRSASDWSDDGVSSPGLAARAQRRPADQQLHNLQALM

**Branchiostoma belcheri:**

>XP\_019643529.1 PREDICTED: neurogenic locus notch homolog protein 1-like [Branchiostoma belcheri]  
MRSFLGAVTLLAAAGPALVQGLVQANNPCLNGGICETDSSSGQSCVCTDGVWGVEYQCEVDPASNPCRHHGTCVVHNDATWSCDPCPLGYRDMICLTVVNDPCVTNPNNGGTCCELITIDEYRCNCQPGYTGDGTCVVHEYCSQPKNGGTCSTSESGYTCACLGGFEGSTCQTDIDECAGTQNGGQCNQTMGFTCTCPKERTGRCLBEEYIPCSFSPCQHGGTCESEYDTEYTHCMSGFTGDDCEVNVDDCVHLCENGAACVQDGVNEYTCTPSEWQGRYCNEDVDECMQSPNICNSGTCHNTVGGYSCVCVNGIWDGDCSENFDDCATAACHFACGTACHDRVGFMMCECAPGKTGLLLCHLDDACESSPCEAGIACDTNPFVNGPCTCTCPDGYAGQLCAGDLCSLGENPCEHDCGNPNVPGSFCTCTGDTGDRCEVNEINCASNPQNGQCTIDICEFRACMPGFAGLDCLCTDIDAGVSCPLCINGICRDNINKYCECEDPGYEGTTCEVNNINECASGFCRNGAHCTDLVTATYCTCLEGFTGTDCENIIDCQSNQCGHGTCDVEVASFTCSCEPGYNGPLCESPVDECDSDPCQNGGTCEDLVNGYRCNCLPGTSGDNCENVQDDCTGNLCVHVGQDGLNTYTCMCDGGYEGENCBESIDECASSPCHNGGICHLVNAFSCBCEPFGYHLLCYHLLCYNECESSPCEHGTQDQGINDYTCTCTGYEGNCKNDVNIDECASNPCQHGEGQDDGIGRYECPCLPGYEGVNCQITDCEGQNPQNGGQGLDGVNNYQCHCELPFVGINQCIELACPENPCNANGSNCISPNADYQTTFTCDCAEGFEGTCADDINECQSNPKNCQNIINLEGDFRCDCLDGLSCVNIIDDCDPPCHNGGTCNDGINSYTCSCMPGFGGTNCEIDIECYSNPCQNGGQCTDAVNGYACDVLGFTGTNGCTNKKDDCTSSSCFSGGTICDGINFTTCQCPGFTGSGNQHIEINESCHFPQNGATCVDQTYGFSCICTGYEGVNTCQKDLCDASDRCRNGGTCQSGDRYECLEDEWTGLICDMTKTYSACAAASERGVLGELCQNGGSCVDTGNSHNCNCPAGRYGSCSEIDECASSPCQNGAQCRDGLGTYSVCVRAGYQVNCQEINEICISNPQNGGTCIDMVNRYRCSPPGTQGLLCEINNDNCFAGACYHDTGTVDGIETTCRCRPGYVGRCEGDVNECLSNPCDAEGTQDCVQLENDRYRCDCKPGYTTG

RRDPVGQEVGMKSFT

[illegible][illegible]

XP\_032230096.1 neurogenic locus notch homolog protein 1 [Nematostella vectensis]  
MSSVLLNFWFLTLFVNAAAGFYQRLKTSSEGKTRPRLAEKLPKYCGSHSTPCENIKDCTKPNQDQICDEBDCNICTDPTTNCCTGCTNGGVCSEAGGVVTCSPKPNFTGAARCELDVDECTTSLSPQC  
GSGVTCDSNVYGVGMCRCITGWDGADCSVNIEDCKQNDFFKCEAGKCTVDKJIGSYICICPPGKTGLNVCDFEACASNPSCANATCTVYGFSGKASICNSGWTGKNCDDVIECEBQDSSTCYPHGCTCRDI  
PGSFVGCDCVPFGAGACREINCEBSPNVHGLLCKDQNPFRKFCACSKGQYTGRLCDVEINCEBSPNLGNCCQDGLNGYSCICTQVGVVGEICQTYNDDCASNPQDCQDQJGDIACPLGLFTGKCK  
CETNTNCECAGNPMCMNGTCIDGINSFRCQCPGLGFTGNRCETEIDECSSPCQNGGCTCKDKINGVYVICPPGASGTHCENDPNDCPANACQNGGVICIDGMNTYSCKCHKPGFTGFGSCGVVNECASSPCRN  
GCTEDGGVAYQYCCRDGVTGKNCVRLISDCHITQNGACSVSTPYASQCKPGYTGQYCTEDVDECAARPVCNAGVCADGVNGFICRCDPFGTGDRGCINVDQCSSPCVHGSSGIDSLINTYTCQY  
CKPGFTGPRCEIHINCEBSSDPGKCEGDCSRIAGSYSCYRPGYTGSNQYGLPDRACNDPCRNAGTCRTGDELDSPFCECKPLGKYGITCDPVCBSAVAGAITCANGGTGCTPSNQGVSCTCKPGFTGYSYCR  
TNIECAKCEPKCYKQACHDAVANYTCTTAGTGTGNKDININECASNPQCRGSLDLNLVNGLYLSCCKPGYIGKHCENIADDFVACNFGNGSCVDGIAEFKCTCPLFGSGSREVDVDECASSPCSAJLT  
QCEINNI GAYHCKQKQFGLGRHCLDINELCSYPCRNCGEKGDKAGYEYTCGLCPHGSGFDCERRVYCTDQPCLNSTGTCRTVHNTYSCSPRGVYGKCEWNNKDCAPACRNGGTIDGYSYSCYKCP  
LPGFAGANCEGIDNCSYCPCKNGGSCRDIVNGYCKDCPSMKITGKNCETVVLQDCVPVNCAGKFDGGKCNPKNCTHENCWDTGTSCLGIEPWSNCTYTGTSKACYQVANGVCDRENTGCGCLDFDGGC  
KPSVPGKCAADYCAARFANAEACTCNVACQNDGLDCSKFKFEIVETGLIVLVVLEAPFMNRSVFMRLSRTLNTAIFKSDSGEKLKVYVLPSPAPVPAERKRKRSAEIKFVIDSJLTSHRFR  
RAAQVQSGVQVQINILNDRGCECTFQSTQEAQYILGAQSTGKLNLYPEKYSVTEKEPTVETPGTGPELWIALILCVGVLPIFVGLAGGKRVYITKLWLEPGVRRVPHQSS[Redacted]SHMS  
MNRKSDLEEEBAGVGDLTLPQEARADAKRVLEEVDSQVRKVESEKDTQWRLHREAADTVNRNLTALTPQGESEKPGITGVDAARGPGETLPHLASCRTGLDRCSSIDDDKESDGGAMV  
SDLLALGASYGARTDIEKETPLHLAARHSADAAKRLLHAGADPNARDKLGRTPLHLAVGADAQGVQILLNRNTDLEAAMEDGTTPLILAARLDLLDIVDKLIKASCKVMNVDAQGSALHWAAMVN  
SHEVTSLECNKNAQNKQDQKQGTPLFLGAREDSLEAVRILLYSANRMIADMDKTFEEVARQANDIVELSDSSGSCSAPAAPTSPDQRSPLNGTASPDSPMDISQGNKVYTHFFVSAGTTR  
PTKNTSTTRGARSQVQENMGAKKKRKKRRLDLPNGNKASQGGASSTYSPYGLKCSGSGANSPAPFVNVNGLSPQGSAGTSPSNSTLSLPQSHSDSPMSQFPLSDSPFDGGLDLDIFDL  
TDQDLDHGFASPCACGLRGSTDLHDLSIMLPEPTIGPVQNDSSVPTTSCMYPPLRSHVAFGHTAPRLYSAHSSPNLCADNESRQLIVASHNGYPSNQSSIQACKLSNRLEEHVMMETTLHHNNQSMC  
VPVESGPRFREKHTTTPSAHSGTSSYSDSPQKPLISYLTSPSPSPKDWSSACVSSDWSNIC

XP\_018853114.1 PREDICTED: neurogenic locus notch homolog protein 1-like [Amphimedon queenslandica]  
MDTRTKAAIIYLGVGSLVFSVAQNLCFVNCTSNNGTCTIENGSDVCMCPSPYSTGMTCEIENVVSGCSTTKCKNGCTCNDEDGVRKCDLPIFTGQFCDSLNMGDCSNPFCNEATCSNFFGAFCVSCPPG  
FTGRCQCTETDNDCAASNPCADGGTCTIDEVNGTCECPGPTGNSCNVDDCRGSDVECHNMGDGLDLVDVYDCTEEFGGRNCIEBSCDPLDNLTKCENNGFCFHRNTSSCSCTGYGTTCYETELNEC  
DSNPNCNGCTCVDKIGTGSFCSCNPFPGYTQCEEVIDMCPQCYNMGACINSSDPCFCRQGYTGQCLVDEIDCLSSCPGNGCNTCEIEMDFGSCGLPGYSGTGQCIDESCSQCNQDGTCTIAGNLT

SCVCSLDYTDENCTTFFITPCYFEPCLNGATCINEDLDNYTCSCLPGFTEEDCSVNIDDCGSNPCQNEGTCLDLVNDYQCDCSAGYTGSDCQTDIDECLMTPCFNNGTCTDLVNSVSCECPPGFNGSLCQ  
NNINECSSSPCSSGSTCIDEIDDFTCCLPMGLTGTCQDISIIDCSMDPCGNNGTCTDTPGGYECSSSGYTGVMCMVNINDCLPHPCNNGTCIDGINEYVCICPEDYTDNCETPIDHCDNPPCSSLAT  
CITNPGGYQCICPIDFTGTDCDFDINDCQPNPCNNGTCSDLIGTFNCSCPLGFEGSICEYDINECASPLCLNGGNCITDLVNGYSCSPHGFNGTNCENSTITTTCESVVCENGGMCDPTTGFECCLCPN  
GYTGPHYCQNNIDDCLSNPCLNNATCIDEIANYTCECTEGFDCRNCAIDTDLCSPPCFNNGGTCSSETSDFSFTCTCLGYFGSHCQNTLDPCSSSPCLNSGICTNVNGTNFSCACSQAYGGERCEIKLFPPD  
CLDMPCLNNGTCAELVSGSGNIGGSGAGEPGPRIYCCQPLGYAGEFCENITDLCVSSPCKNNATCIGDSANFTCTCLPGFTGTLCETELTGCHTELYPCLNGGECMEMDGGQFMCNCAPGFTGPLCGYGIN  
ECRNQPCLNNGGTCRDFFRYYVICPPNFTGTDCESMIDPCTNIDCNGGSCIGDMGTYTCQCDPGWTGLQCESEINECDGVDCITNGTCVDLINNYTCQCSDGFTGQFCEINIDDCAGINCNNGTCTVDGIG  
SYQCDCLLGYTGPSCDTIIIDCAGMPCMNNASCIDLFNNYTCVCSDGFTGRFCEVNIDCLNINCNNGSCEDLINDHMCNCFPGFTDQRCETDINECDGNPCNDGTCTDGINSFSCCPPDYTGDTCDT  
EINLCLEMQPCLNNGTCTSDKIEGPIYNCSCSVPLYSGDNCEQINCSLSPCQNNATCTGNLTGDYTCCHCSENYGTHCERFDYCHSNPCQNDGTCTINGSPGNLISDTFLCICMPQFNGSDCSMELS  
PCSIDPCMNGGTCTVEDGSTYCCQCPVGYTGNNCEVFSSDTPYFNGDSYTLVPYSPNNNNSQSLINLHFRSSQSGLLLYISEEDHSSYLSLGEAGLLSLMRQEGSFQSVARYHPVSDDRWHYVEV  
TQNGLEIKTEIDGYPNSTSLIDMFLIFEPAVTYIGGFNDYTSLPFAVLQSSGFIGYINATIQLGGEALHIIDDSIAGRDIAGGEAAGSCGPETCSNGGICVEESQSSFLCLCPIGFRGDTCEQDTEIIV  
PYFNTRSyaIVSNDAFSLYGGIDIDITLHTSSPNGLIYYLYDSTNVTNDYFTLYLEEGGIGIEYSMEGSAHIVSYQGNVSDNEWHLMTVQLNTSGLYLILDGSVLVLYSNNATLSSIIYLTSPFLGGLPN  
GLIADSVSGSGLNGCIRDVQISNTSLGLIENNVLVYGLGLECPQSLCPLVQCLNGGTCVSDSVSFGFECSCSPSGYNGTYCEVLLSTCIPNPFCLFDGVCTDFNNMTYSQCQCTLGRQGRICDEELNITVP  
AFYGNsYLAYSSLSITNVQSNLILSLTFKTPSPSGLLLFNHGSNTDFSQYVSI SLVNSSVYKFDLGSGLATISSPITLGLNQWHTITAYRTGRVGFRLVNDEELNTSLGLTNGLNLIAGDMWLGGT  
DRFNIISQHAGVGTGLTGCISSSVNGIISINLVSSAERGLNIGECNMTSCSSFPFCFNGGTCTETGSSFFICQCPAGYEGGLCGLQTFSCLSPPCGNGGTCTIEGVAEGGYNCLPLGFGGNNCNEMLQVST  
PSFNRTSYQEYSSPAPISLSTIISLSFHPTSSNGLILYIGDVSTTRDFLSLSLVSGRIQLRYDLGSGPAI IASPSV I PLNQWTSVTNVRVRKDVVLVVDVSVSTNGSSPGFAGLLNPAGNLYIGGGAGGV  
GGYQVSPNAGSHVGLTGCVDTATLRVNSFGLGAVISSRGVIQCQVDPCSHSPCQNGGSCVSSDLTYSCVCPLGYSGDQCQEISNATEGAAISQCPTSVA CNVNPNCLNGGKCI AVLNGIIEERCQCSLP  
FAAGAKCEQRVSFSSAFFAGDGYLLFFAVNIPLSSITIHTEIRLSIIPSNGSGLLLYIGHANPSTGNVLLVGMNEGVLEFRFQLGSGVGLVETSQPLAIGQQHNITLLRTDYRGRILMSQGNNTTVFTDG  
MSQSSSRHLNLSPYDFVFLFGLGAPNVPLISQQVYQTGFSGCLVSVVQLGYSMNPEVPVPTDSSYGENVITCS

## Alignment:

|                                 |                                                               |     |
|---------------------------------|---------------------------------------------------------------|-----|
| XP_012554603.1[H.vulgaris]      | MVFYMLLLFHVLMVACNTNVKGYVDSKQNNFEYAANYKCPNGWQQRCEKCYLYVNESKQ   | 60  |
| XP_019853114.1[A.queenslandica] | -----                                                         | 0   |
| XP_032230096.1[N.vectensis]     | -----                                                         | 0   |
| NF_001245510.1[D.melanogaster]  | -----                                                         | 0   |
| XP_019643529.1[B.belcheri]      | -----                                                         | 0   |
| XP_032815028.1[P.marinus]       | -----                                                         | 0   |
| XP_014025097.1[S.salar]         | -----                                                         | 0   |
| XP_018114267.1[X.laevis]        | -----                                                         | 0   |
| NF_001238962.2[G.gallus]        | -----                                                         | 0   |
| NF_035058.2[M.musculus]         | -----                                                         | 0   |
| Q04721.3[H.sapiens]             | -----                                                         | 0   |
| XP_009243797.2[P.abelii]        | -----                                                         | 0   |
|                                 |                                                               |     |
| XP_012554603.1[H.vulgaris]      | WTDAQYYCKQNGGNLVTIKEDAVNLFRLARYVQYSSRLAITIWTGLHARKVHKEFQWVDNS | 120 |
| XP_019853114.1[A.queenslandica] | -----                                                         | 0   |
| XP_032230096.1[N.vectensis]     | -----                                                         | 0   |
| NF_001245510.1[D.melanogaster]  | -----                                                         | 0   |
| XP_019643529.1[B.belcheri]      | -----                                                         | 0   |
| XP_032815028.1[P.marinus]       | -----                                                         | 0   |
| XP_014025097.1[S.salar]         | -----                                                         | 0   |
| XP_018114267.1[X.laevis]        | -----                                                         | 0   |
| NF_001238962.2[G.gallus]        | -----                                                         | 0   |
| NF_035058.2[M.musculus]         | -----                                                         | 0   |
| Q04721.3[H.sapiens]             | -----                                                         | 0   |
| XP_009243797.2[P.abelii]        | -----                                                         | 0   |
|                                 |                                                               |     |
| XP_012554603.1[H.vulgaris]      | ESVHYEFRWLPGQPNMVTLDGECVEMYTKSRQYLWDDVSCSKESPFCQTGDCIIGTQRC   | 180 |
| XP_019853114.1[A.queenslandica] | -----                                                         | 0   |
| XP_032230096.1[N.vectensis]     | -----                                                         | 0   |
| NF_001245510.1[D.melanogaster]  | -----                                                         | 0   |
| XP_019643529.1[B.belcheri]      | -----                                                         | 0   |
| XP_032815028.1[P.marinus]       | -----                                                         | 0   |
| XP_014025097.1[S.salar]         | -----                                                         | 0   |
| XP_018114267.1[X.laevis]        | -----                                                         | 0   |
| NF_001238962.2[G.gallus]        | -----                                                         | 0   |
| NF_035058.2[M.musculus]         | -----                                                         | 0   |
| Q04721.3[H.sapiens]             | -----                                                         | 0   |
| XP_009243797.2[P.abelii]        | -----                                                         | 0   |
|                                 |                                                               |     |
| XP_012554603.1[H.vulgaris]      | DNGKCVSKHLFCDSKNDCGDFSDEKNCTKCNEHYTAQEGSISSPNFPQHYGNRDCRWLI   | 240 |
| XP_019853114.1[A.queenslandica] | -----                                                         | 0   |
| XP_032230096.1[N.vectensis]     | -----                                                         | 0   |
| NF_001245510.1[D.melanogaster]  | -----                                                         | 0   |
| XP_019643529.1[B.belcheri]      | -----                                                         | 0   |
| XP_032815028.1[P.marinus]       | -----                                                         | 0   |
| XP_014025097.1[S.salar]         | -----                                                         | 0   |
| XP_018114267.1[X.laevis]        | -----                                                         | 0   |
| NF_001238962.2[G.gallus]        | -----                                                         | 0   |
| NF_035058.2[M.musculus]         | -----                                                         | 0   |
| Q04721.3[H.sapiens]             | -----                                                         | 0   |
| XP_009243797.2[P.abelii]        | -----                                                         | 0   |
|                                 |                                                               |     |
| XP_012554603.1[H.vulgaris]      | EVESYIIIEIKFLEFFIENSFDWVEVFDGPTLASKSFGKFSGNFKPEVILSSSSKILVHL  | 300 |
| XP_019853114.1[A.queenslandica] | -----                                                         | 0   |
| XP_032230096.1[N.vectensis]     | -----                                                         | 0   |
| NF_001245510.1[D.melanogaster]  | -----                                                         | 0   |
| XP_019643529.1[B.belcheri]      | -----                                                         | 0   |
| XP_032815028.1[P.marinus]       | -----                                                         | 0   |
| XP_014025097.1[S.salar]         | -----                                                         | 0   |
| XP_018114267.1[X.laevis]        | -----                                                         | 0   |
| NF_001238962.2[G.gallus]        | -----                                                         | 0   |
| NF_035058.2[M.musculus]         | -----                                                         | 0   |
| Q04721.3[H.sapiens]             | -----                                                         | 0   |
| XP_009243797.2[P.abelii]        | -----                                                         | 0   |
|                                 |                                                               |     |
| XP_012554603.1[H.vulgaris]      | KSDKSTSDDKFFARYKAVKGCNVDLIINSNKPEYISSPNFPLNYPDNTKCEWTIRNEDP   | 360 |
| XP_019853114.1[A.queenslandica] | -----                                                         | 0   |
| XP_032230096.1[N.vectensis]     | -----                                                         | 0   |
| NF_001245510.1[D.melanogaster]  | -----                                                         | 0   |
| XP_019643529.1[B.belcheri]      | -----                                                         | 0   |
| XP_032815028.1[P.marinus]       | -----                                                         | 0   |
| XP_014025097.1[S.salar]         | -----                                                         | 0   |
| XP_018114267.1[X.laevis]        | -----                                                         | 0   |
| NF_001238962.2[G.gallus]        | -----                                                         | 0   |
| NF_035058.2[M.musculus]         | -----                                                         | 0   |
| Q04721.3[H.sapiens]             | -----                                                         | 0   |
| XP_009243797.2[P.abelii]        | -----                                                         | 0   |
|                                 |                                                               |     |
| XP_012554603.1[H.vulgaris]      | SKILTFQLELETEENDFIEVRDGLTEDNALLGKFFGNFSNIQKRHIFTSNFKMHVKFQS   | 420 |
| XP_019853114.1[A.queenslandica] | -----                                                         | 0   |
| XP_032230096.1[N.vectensis]     | -----                                                         | 0   |
| NF_001245510.1[D.melanogaster]  | -----                                                         | 0   |
| XP_019643529.1[B.belcheri]      | -----                                                         | 0   |
| XP_032815028.1[P.marinus]       | -----                                                         | 0   |
| XP_014025097.1[S.salar]         | -----                                                         | 0   |
| XP_018114267.1[X.laevis]        | -----                                                         | 0   |

|                                 |                                                               |     |
|---------------------------------|---------------------------------------------------------------|-----|
| NF_001238962.2[G.gallus]        | -----                                                         | 0   |
| NF_035058.2[M.musculus]         | -----                                                         | 0   |
| Q04721.3[H.sapiens]             | -----                                                         | 0   |
| XP_009243797.2[P.abelii]        | -----                                                         | 0   |
|                                 |                                                               |     |
| XP_012554603.1[H.vulgaris]      | NFQLNQKGFRVIFSGCTATINATHGTISSPNFGVGNYPNNILCSWTVHAQTDEKVSIVIF  | 480 |
| XP_019853114.1[A.queenslandica] | -----                                                         | 0   |
| XP_032230096.1[N.vectensis]     | -----                                                         | 0   |
| NF_001245510.1[D.melanogaster]  | -----                                                         | 0   |
| XP_019643529.1[B.belcheri]      | -----                                                         | 0   |
| XP_032815028.1[P.marinus]       | -----                                                         | 0   |
| XP_014025097.1[S.salar]         | -----                                                         | 0   |
| XP_018114267.1[X.laervis]       | -----                                                         | 0   |
| NF_001238962.2[G.gallus]        | -----                                                         | 0   |
| NF_035058.2[M.musculus]         | -----                                                         | 0   |
| Q04721.3[H.sapiens]             | -----                                                         | 0   |
| XP_009243797.2[P.abelii]        | -----                                                         | 0   |
|                                 |                                                               |     |
| XP_012554603.1[H.vulgaris]      | HSFDTEYKQDVTVLRTCDDVMIKECYGSNKTTLGKEMPLLEPIVFNSSCFKVIKSDETY   | 540 |
| XP_019853114.1[A.queenslandica] | -----                                                         | 0   |
| XP_032230096.1[N.vectensis]     | -----                                                         | 0   |
| NF_001245510.1[D.melanogaster]  | -----                                                         | 0   |
| XP_019643529.1[B.belcheri]      | -----                                                         | 0   |
| XP_032815028.1[P.marinus]       | -----                                                         | 0   |
| XP_014025097.1[S.salar]         | -----                                                         | 0   |
| XP_018114267.1[X.laervis]       | -----                                                         | 0   |
| NF_001238962.2[G.gallus]        | -----                                                         | 0   |
| NF_035058.2[M.musculus]         | -----                                                         | 0   |
| Q04721.3[H.sapiens]             | -----                                                         | 0   |
| XP_009243797.2[P.abelii]        | -----                                                         | 0   |
|                                 |                                                               |     |
| XP_012554603.1[H.vulgaris]      | SLEGFNATFSIGCPMLPAINGGSFRQDQKFYGASVEYKCDRSFRIKSENGNVRKCMYGGN  | 600 |
| XP_019853114.1[A.queenslandica] | -----                                                         | 0   |
| XP_032230096.1[N.vectensis]     | -----                                                         | 0   |
| NF_001245510.1[D.melanogaster]  | -----                                                         | 0   |
| XP_019643529.1[B.belcheri]      | -----                                                         | 0   |
| XP_032815028.1[P.marinus]       | -----                                                         | 0   |
| XP_014025097.1[S.salar]         | -----                                                         | 0   |
| XP_018114267.1[X.laervis]       | -----                                                         | 0   |
| NF_001238962.2[G.gallus]        | -----                                                         | 0   |
| NF_035058.2[M.musculus]         | -----                                                         | 0   |
| Q04721.3[H.sapiens]             | -----                                                         | 0   |
| XP_009243797.2[P.abelii]        | -----                                                         | 0   |
|                                 |                                                               |     |
| XP_012554603.1[H.vulgaris]      | WSEPAFPCEEINCGHPGTIENGGFIEIYPLNSTFVFMSTVKYSCNVGYILVGEPNRVCQVN | 660 |
| XP_019853114.1[A.queenslandica] | -----                                                         | 0   |
| XP_032230096.1[N.vectensis]     | -----                                                         | 0   |
| NF_001245510.1[D.melanogaster]  | -----                                                         | 0   |
| XP_019643529.1[B.belcheri]      | -----                                                         | 0   |
| XP_032815028.1[P.marinus]       | -----                                                         | 0   |
| XP_014025097.1[S.salar]         | -----                                                         | 0   |
| XP_018114267.1[X.laervis]       | -----                                                         | 0   |
| NF_001238962.2[G.gallus]        | -----                                                         | 0   |
| NF_035058.2[M.musculus]         | -----                                                         | 0   |
| Q04721.3[H.sapiens]             | -----                                                         | 0   |
| XP_009243797.2[P.abelii]        | -----                                                         | 0   |
|                                 |                                                               |     |
| XP_012554603.1[H.vulgaris]      | STWSGGVERKCEVLKCPDPGTPVNGTRSGNEFNVGSSITFSCEKGFRRHGARTITCGITG  | 720 |
| XP_019853114.1[A.queenslandica] | -----                                                         | 0   |
| XP_032230096.1[N.vectensis]     | -----                                                         | 0   |
| NF_001245510.1[D.melanogaster]  | -----                                                         | 0   |
| XP_019643529.1[B.belcheri]      | -----                                                         | 0   |
| XP_032815028.1[P.marinus]       | -----                                                         | 0   |
| XP_014025097.1[S.salar]         | -----                                                         | 0   |
| XP_018114267.1[X.laervis]       | -----                                                         | 0   |
| NF_001238962.2[G.gallus]        | -----                                                         | 0   |
| NF_035058.2[M.musculus]         | -----                                                         | 0   |
| Q04721.3[H.sapiens]             | -----                                                         | 0   |
| XP_009243797.2[P.abelii]        | -----                                                         | 0   |
|                                 |                                                               |     |
| XP_012554603.1[H.vulgaris]      | KWSSETPLCKVVVCQLPSFSLNTIISSSSIGFNTPYKTVLHISCKKGFELIGSVNITCTE  | 780 |
| XP_019853114.1[A.queenslandica] | -----                                                         | 0   |
| XP_032230096.1[N.vectensis]     | -----                                                         | 0   |
| NF_001245510.1[D.melanogaster]  | -----                                                         | 0   |
| XP_019643529.1[B.belcheri]      | -----                                                         | 0   |
| XP_032815028.1[P.marinus]       | -----                                                         | 0   |
| XP_014025097.1[S.salar]         | -----                                                         | 0   |
| XP_018114267.1[X.laervis]       | -----                                                         | 0   |
| NF_001238962.2[G.gallus]        | -----                                                         | 0   |
| NF_035058.2[M.musculus]         | -----                                                         | 0   |
| Q04721.3[H.sapiens]             | -----                                                         | 0   |
| XP_009243797.2[P.abelii]        | -----                                                         | 0   |
|                                 |                                                               |     |
| XP_012554603.1[H.vulgaris]      | SGAWKPDVPQCIDINECLNNPCRGLGSQCTNLMGSYKCTCKSGFRQIDETTCEDIDECKS  | 840 |
| XP_019853114.1[A.queenslandica] | -----                                                         | 0   |
| XP_032230096.1[N.vectensis]     | -----                                                         | 0   |
| NF_001245510.1[D.melanogaster]  | -----                                                         | 0   |
| XP_019643529.1[B.belcheri]      | -----                                                         | 0   |

|                                 |                                                               |      |
|---------------------------------|---------------------------------------------------------------|------|
| XP_032815028.1[P.marinus]       | -----                                                         | 0    |
| XP_014025097.1[S.salar]         | -----                                                         | 0    |
| XP_018114267.1[X.laevis]        | -----                                                         | 0    |
| NP_001238962.2[G.gallus]        | -----                                                         | 0    |
| NP_035058.2[M.musculus]         | -----                                                         | 0    |
| Q04721.3[H.sapiens]             | -----                                                         | 0    |
| XP_009243797.2[P.abelii]        | -----                                                         | 0    |
|                                 |                                                               |      |
| XP_012554603.1[H.vulgaris]      | SGKTVKCNQKCTNIDGGYFCSCEDGYFLYDGDNKTVNRVEAEESFVNHTCLGNPCKLPKI  | 900  |
| XP_019853114.1[A.queenslandica] | -----                                                         | 0    |
| XP_032230096.1[N.vectensis]     | -----                                                         | 0    |
| NP_001245510.1[D.melanogaster]  | -----                                                         | 0    |
| XP_019643529.1[B.belcheri]      | -----                                                         | 0    |
| XP_032815028.1[P.marinus]       | -----                                                         | 0    |
| XP_014025097.1[S.salar]         | -----                                                         | 0    |
| XP_018114267.1[X.laevis]        | -----                                                         | 0    |
| NP_001238962.2[G.gallus]        | -----                                                         | 0    |
| NP_035058.2[M.musculus]         | -----                                                         | 0    |
| Q04721.3[H.sapiens]             | -----                                                         | 0    |
| XP_009243797.2[P.abelii]        | -----                                                         | 0    |
|                                 |                                                               |      |
| XP_012554603.1[H.vulgaris]      | PENGYILNYGNRYPTTEITFCQDKGWIVDGDLSIKCLKNGSWGSGISDCIAARCNPDPVP  | 960  |
| XP_019853114.1[A.queenslandica] | -----                                                         | 0    |
| XP_032230096.1[N.vectensis]     | -----                                                         | 0    |
| NP_001245510.1[D.melanogaster]  | -----                                                         | 0    |
| XP_019643529.1[B.belcheri]      | -----                                                         | 0    |
| XP_032815028.1[P.marinus]       | -----                                                         | 0    |
| XP_014025097.1[S.salar]         | -----                                                         | 0    |
| XP_018114267.1[X.laevis]        | -----                                                         | 0    |
| NP_001238962.2[G.gallus]        | -----                                                         | 0    |
| NP_035058.2[M.musculus]         | -----                                                         | 0    |
| Q04721.3[H.sapiens]             | -----                                                         | 0    |
| XP_009243797.2[P.abelii]        | -----                                                         | 0    |
|                                 |                                                               |      |
| XP_012554603.1[H.vulgaris]      | NSSSVVDGGLVKGQYSQGTIYTYTCINGYEIISGNSKRMCSQNATASFWSGSSPVCERVS  | 1020 |
| XP_019853114.1[A.queenslandica] | -----                                                         | 0    |
| XP_032230096.1[N.vectensis]     | -----                                                         | 0    |
| NP_001245510.1[D.melanogaster]  | -----                                                         | 0    |
| XP_019643529.1[B.belcheri]      | -----                                                         | 0    |
| XP_032815028.1[P.marinus]       | -----                                                         | 0    |
| XP_014025097.1[S.salar]         | -----                                                         | 0    |
| XP_018114267.1[X.laevis]        | -----                                                         | 0    |
| NP_001238962.2[G.gallus]        | -----                                                         | 0    |
| NP_035058.2[M.musculus]         | -----                                                         | 0    |
| Q04721.3[H.sapiens]             | -----                                                         | 0    |
| XP_009243797.2[P.abelii]        | -----                                                         | 0    |
|                                 |                                                               |      |
| XP_012554603.1[H.vulgaris]      | CGPLENPKNGHVNITGDKYGDSSKFFCDGGYIITGNDSSTCQANGRWSASSPFCLASPCP  | 1080 |
| XP_019853114.1[A.queenslandica] | -----                                                         | 0    |
| XP_032230096.1[N.vectensis]     | -----                                                         | 0    |
| NP_001245510.1[D.melanogaster]  | -----                                                         | 0    |
| XP_019643529.1[B.belcheri]      | -----                                                         | 0    |
| XP_032815028.1[P.marinus]       | -----                                                         | 0    |
| XP_014025097.1[S.salar]         | -----                                                         | 0    |
| XP_018114267.1[X.laevis]        | -----                                                         | 0    |
| NP_001238962.2[G.gallus]        | -----                                                         | 0    |
| NP_035058.2[M.musculus]         | -----                                                         | 0    |
| Q04721.3[H.sapiens]             | -----                                                         | 0    |
| XP_009243797.2[P.abelii]        | -----                                                         | 0    |
|                                 |                                                               |      |
| XP_012554603.1[H.vulgaris]      | DPGIPINGEIIIGLISLDQTTIFRCLVNGSILIGDNKRTCIFNKSTGLNQWNGSQPFCKDT | 1140 |
| XP_019853114.1[A.queenslandica] | -----                                                         | 0    |
| XP_032230096.1[N.vectensis]     | -----                                                         | 0    |
| NP_001245510.1[D.melanogaster]  | -----                                                         | 0    |
| XP_019643529.1[B.belcheri]      | -----                                                         | 0    |
| XP_032815028.1[P.marinus]       | -----                                                         | 0    |
| XP_014025097.1[S.salar]         | -----                                                         | 0    |
| XP_018114267.1[X.laevis]        | -----                                                         | 0    |
| NP_001238962.2[G.gallus]        | -----                                                         | 0    |
| NP_035058.2[M.musculus]         | -----                                                         | 0    |
| Q04721.3[H.sapiens]             | -----                                                         | 0    |
| XP_009243797.2[P.abelii]        | -----                                                         | 0    |
|                                 |                                                               |      |
| XP_012554603.1[H.vulgaris]      | STPTFKFCPMSTIEFTLPQSEKSMVNWTLPTLTDNVHLLNITVSPDYVSPMVMPAGLN    | 1200 |
| XP_019853114.1[A.queenslandica] | -----                                                         | 0    |
| XP_032230096.1[N.vectensis]     | -----                                                         | 0    |
| NP_001245510.1[D.melanogaster]  | -----                                                         | 0    |
| XP_019643529.1[B.belcheri]      | -----                                                         | 0    |
| XP_032815028.1[P.marinus]       | -----                                                         | 0    |
| XP_014025097.1[S.salar]         | -----                                                         | 0    |
| XP_018114267.1[X.laevis]        | -----                                                         | 0    |
| NP_001238962.2[G.gallus]        | -----                                                         | 0    |
| NP_035058.2[M.musculus]         | -----                                                         | 0    |
| Q04721.3[H.sapiens]             | -----                                                         | 0    |
| XP_009243797.2[P.abelii]        | -----                                                         | 0    |
|                                 |                                                               |      |
| XP_012554603.1[H.vulgaris]      | IITYTATYKDGSTAVCEVKINVQDKEIPKIFCPKNIVIKSDLSSKVFWSGDIYTDNVGIK  | 1260 |
| XP_019853114.1[A.queenslandica] | -----MDTR-----                                                | 4    |

|                                 |                                                              |      |
|---------------------------------|--------------------------------------------------------------|------|
| XP_032230096.1[N.vectensis]     | -----                                                        | 0    |
| NF_001245510.1[D.melanogaster]  | -----MQSQSRRRRSRAPN-----TWICFWINKMHAV----                    | 27   |
| XP_019643529.1[B.belcheri]      | -----                                                        | 0    |
| XP_032815028.1[P.marinus]       | -----MEPRAL-----                                             | 6    |
| XP_014025097.1[S.salar]         | -----MGQL-----                                               | 4    |
| XP_018114267.1[X.laavis]        | -----                                                        | 0    |
| NF_001238962.2[G.gallus]        | -----MARGAG-----                                             | 6    |
| NF_035058.2[M.musculus]         | -----MP--A-----                                              | 3    |
| Q04721.3[H.sapiens]             | -----MP--A-----                                              | 3    |
| XP_009243797.2[P.abelii]        | -----MP--A-----                                              | 3    |
|                                 |                                                              |      |
| XP_012554603.1[H.vulgaris]      | NVIFNPNG--TILESNKYHKVTMTVEDISGNSDSCVMEIYVEGCGCTQRTCDYKQRNGQ  | 1318 |
| XP_019853114.1[A.queenslandica] | -----TKAAILYLLVGCWLSFS-----VAQNLCFVNTCSNNGTCYI-ENG           | 44   |
| XP_032230096.1[N.vectensis]     | -----                                                        | 0    |
| NF_001245510.1[D.melanogaster]  | --ASLPASLPL-LLTLAFANLPNTV---R-GTDTALVAASCTSVGCQNGGTCVTQLNGK  | 80   |
| XP_019643529.1[B.belcheri]      | ---MRSLFAVVLALLAAGPALV-----Q-----GLVCQANNSPCLNGGTCETDSSGQ    | 44   |
| XP_032815028.1[P.marinus]       | --LPL-LRL-LLLLALLGARLS-----R-----GLQCQDSNQPCINGGTCETFANGT    | 50   |
| XP_014025097.1[S.salar]         | --PVF-SSG-KVLIVTVCCVRLS-----L-----ALQCLDAVKPCVNNATCATFTNGT   | 48   |
| XP_018114267.1[X.laavis]        | --MGVQAVF-GLCVL-LLGMPC-----D-----GLQCRGASEPCVNEGRCITSDDGS    | 44   |
| NF_001238962.2[G.gallus]        | --PAPAALF-GLVLAVLSRAEPA-----A-----ALQCMDDSKPCVNEGKCIPYQNGT   | 51   |
| NF_035058.2[M.musculus]         | --LRPALR-ALLWLWLCGAGPA-----H-----ALQCRGQEPVCVNEGTCVTYHNGT    | 48   |
| Q04721.3[H.sapiens]             | --LRPALLW-ALLALWLCCAAPA-----H-----ALQCRDGYEPCVNEGMCVTYHNGT   | 48   |
| XP_009243797.2[P.abelii]        | --LRPALPW-ALLALWLCCAAPA-----R-----ALQCRDGYEPCVNEGMCVTYHNGT   | 48   |
|                                 |                                                              |      |
| XP_012554603.1[H.vulgaris]      | SVCTIAPGVVPTDVII-----S                                       | 1335 |
| XP_019853114.1[A.queenslandica] | DVCMCPSPSYTGMTCEIEVVSGQSTTKNGGTCND---EDGVVRCDCLPIFTGQFCDL    | 100  |
| XP_032230096.1[N.vectensis]     | -----                                                        | 0    |
| NF_001245510.1[D.melanogaster]  | TYCACDSHYVGDYCEH--RNPCNSMRCQNGGTCQVTFRNGRPGISCKPLGFDESLSCEIA | 138  |
| XP_019643529.1[B.belcheri]      | GSCVCTDGMVGEYQCE--VDPASNPCRHGCTCVVH---DNATWSCDCPLGYRDMICLTV  | 99   |
| XP_032815028.1[P.marinus]       | GICKQHNFFVGIYQQL--DNRCASSPCQNGGTCSTVVRGGVDPDYACEPLGFMDPVCLTP | 108  |
| XP_014025097.1[S.salar]         | GYCRCAAGFLGDYCHH--KDPCHPGYCLNGGNCVAVSGIPGSPTCSCPLGYTGQHCQTP  | 106  |
| XP_018114267.1[X.laavis]        | AYCKCPDAFVGEYQCL--QNPCEVTVCLNGGSKV--SPDLSKGVCTCAPGFSGENCKQP  | 100  |
| NF_001238962.2[G.gallus]        | GYCKCREGLDGYCQY--RNPCESNTCKNGGTCET--TSLIGKATCKCAPGFTGEDCQYS  | 107  |
| NF_035058.2[M.musculus]         | GFCRCPEGLGEYQCH--RDPCEKNRCQNGGTCVP--QGMLGKATCRCAPGFTGEDCQYS  | 104  |
| Q04721.3[H.sapiens]             | GYCKCPEGLGEYQCH--RDPCEKNRCQNGGTCVA--QAMLGKATCRCASGFTGEDCQYS  | 104  |
| XP_009243797.2[P.abelii]        | GYCKCPEGLGEYQCH--RDPCEKNRCQNGGTCVA--QAMLGKATCRCASGFTGEDCQYS  | 104  |
|                                 |                                                              |      |
| XP_012554603.1[H.vulgaris]      | CNLN-----CFQNKTTFRVSNTEFEKTSNVMCIPNKGWENKSPSGCVERKPLISCLKGS  | 1389 |
| XP_019853114.1[A.queenslandica] | LN-GC-DSNPCFNEATCSNF-FGA-----FVSCSPPGTGRQCTDNNDCASNPADGG     | 151  |
| XP_032230096.1[N.vectensis]     | -----MWSVLNIFWF-LTIFVNAKA---                                 | 19   |
| NF_001245510.1[D.melanogaster]  | VPNAC-DHVTCLNGGTCQLKLEE-----YTACANGYTGERCETK-NLCASSPCRNGA    | 190  |
| XP_019643529.1[B.belcheri]      | VDPNC-VTPNCPNNGGTCELITIDE-----YRCNCQPGYTGDTCDDV-EHCYSQPCKNNG | 151  |
| XP_032815028.1[P.marinus]       | ADNAC-LGVPCPNNGGTCRLLSLHR-----FECHLLGWSGKTCEKA-DPCASNPCAHHG  | 160  |
| XP_014025097.1[S.salar]         | QNSTCYPNNPCANQGVCTLLSLDK-----YKCCQAHGWTGMRNRE-DSCLSGPCANGG   | 159  |
| XP_018114267.1[X.laavis]        | VASVCSLTQPCMNNGGTCRLLTLEH-----YECICPFGRGKDCEFI-DACASQPCANGS  | 153  |
| NF_001238962.2[G.gallus]        | ESHICYVSQPCNLNGGTCPHSQET-----YECVCPPGYTGKDCQWI-DACTSQPCANGS  | 160  |
| NF_035058.2[M.musculus]         | TSHPCFVSRRPCQNGGTCCHLSRDT-----YECTCQVGTGKQCQWT-DACLSPCANGS   | 157  |
| Q04721.3[H.sapiens]             | TSHPCFVSRRPCNLNGGTCCHLSRDT-----YECTCQVGTGKQCQWT-DACLSPCANGS  | 157  |
| XP_009243797.2[P.abelii]        | TSHPCFVSRRPCNLNGGTCCHLSRDT-----YECTCQVGTGKQCQWT-DACLSPCANGS  | 157  |
|                                 |                                                              |      |
| XP_012554603.1[H.vulgaris]      | LSIDFTTGDNTNEKPLDIFTFLNNLNKSTCSFIYQTGNLISNGTSVAGDFKILSHDDG   | 1449 |
| XP_019853114.1[A.queenslandica] | TCIDE--VNGYT-----CECPPGFTGSNCS-----                          | 174  |
| XP_032230096.1[N.vectensis]     | -----AGFY-----YQRLKTSEKTCR-----                              | 36   |
| NF_001245510.1[D.melanogaster]  | TCTALAGSSSFT-----CSCPFGTGDTC-----                            | 215  |
| XP_019643529.1[B.belcheri]      | TCTS-TE-SGYT-----CACLGFEFGSTCQ-----                          | 174  |
| XP_032815028.1[P.marinus]       | SCRA-VG-SRYA-----CACRPFSGPMCR-----                           | 183  |
| XP_014025097.1[S.salar]         | TCSSPPG-GKFG-----CTCPCGYLGRCL-----                           | 183  |
| XP_018114267.1[X.laavis]        | TCPL-NE-NQYS-----CTCQAGYTLKCE-----                           | 176  |
| NF_001238962.2[G.gallus]        | TCTV-SG-HKFS-----CICQSGYTGQKCE-----                          | 183  |
| NF_035058.2[M.musculus]         | TCTS-VA-SQFS-----CKCPAGLTGQKCE-----                          | 180  |
| Q04721.3[H.sapiens]             | TCTT-VA-NQFS-----CKCLTGFTGQKCE-----                          | 180  |
| XP_009243797.2[P.abelii]        | TCTT-VA-NQFS-----CKCLPGFTGQKCE-----                          | 180  |
|                                 |                                                              |      |
| XP_012554603.1[H.vulgaris]      | VIPLLNGLHECKTILLKDLDFKTLNLLQTLSSVDIKLLNISSCCPLNKSYYCCPTGHLIK | 1509 |
| XP_019853114.1[A.queenslandica] | -----INIDDCRG-----DVECHNDGECLDLVDDYDCDTEE--                  | 207  |
| XP_032230096.1[N.vectensis]     | -----PRLEAKL-----YKPF-----                                   | 46   |
| NF_001245510.1[D.melanogaster]  | -----YDIEECQSN-----PCKYGGTCVNTHGSYQCMCTG--                   | 246  |
| XP_019643529.1[B.belcheri]      | -----TDIDECAGT-----NPCQSGGQCNQTMGSFTCTCPKE--                 | 206  |
| XP_032815028.1[P.marinus]       | -----ADVDECAAS-----PCRNNGGSCANVPGSYACAPAA--                  | 214  |
| XP_014025097.1[S.salar]         | -----NDTDECAAS-----APVCQNGRCVNTPGSYRCNCAPG--                 | 216  |
| XP_018114267.1[X.laavis]        | -----MDVNECTSP-----GLCKNGGTCENLPGSYRCQCHPG--                 | 208  |
| NF_001238962.2[G.gallus]        | -----IDVNECATS-----GLCHHGGTCINLPGSYRCQCPQG--                 | 215  |
| NF_035058.2[M.musculus]         | -----ADINECDIP-----GRCQHGCTCLNLPGSYRCQCPQG--                 | 212  |
| Q04721.3[H.sapiens]             | -----TDVNECDIP-----GHCQHGCTCLNLPGSYRCQCPQG--                 | 212  |
| XP_009243797.2[P.abelii]        | -----TDVNECDIP-----GHCQHGCTCLNLPGSYRCQCPQG--                 | 212  |
|                                 |                                                              |      |
| XP_012554603.1[H.vulgaris]      | TTGLTVKASY-CIPG----LGMYNHSTNN--KCLNCPVGFYNDLEFADQCKRCPNETN   | 1561 |
| XP_019853114.1[A.queenslandica] | FGGRNCEIESDCPLDNLTCENNGFCHRNST---SCSCITGYTGTYC-ETELNECDS--   | 260  |
| XP_032230096.1[N.vectensis]     | YC-----GSHTPCENIKDCTKPN--QCICD-EDCGNIC-TDPTNCTT--            | 86   |
| NF_001245510.1[D.melanogaster]  | YTGKDDCTKYK--PCSPSPCQNGGTCISNG-LSYECKCPKGFEGKNC-EQNYDDCLG--  | 299  |
| XP_019643529.1[B.belcheri]      | RTGLCEEEYI--PCSPSPCQHGCTCESVDTYEYTHCMSGFTGDDC-EVNVDCCVD--    | 260  |
| XP_032815028.1[P.marinus]       | YTRGHCETAYV--PCAPSPCLNGGTCRQTGDTAYDCSCCLPGFEGRDC-DVNVDDCPG-- | 268  |
| XP_014025097.1[S.salar]         | FTGRQCETPYI--PCSPSPCLNGGTCRPTSETSYWCHCLPGFNNGTNC-ENNIDDCPD-- | 270  |
| XP_018114267.1[X.laavis]        | YIGQRCESPFI--PCSPSPCMNGGTCRQTSEFAYECNCLPGFDGKNC-ESNIDDCPS--  | 262  |
| NF_001238962.2[G.gallus]        | YTHRCESNYV--PCSPSPCMNGGTCRQTSDTFECNCLPGFEGKNC-EKNVDDCPN--    | 269  |
| NF_035058.2[M.musculus]         | FTGQHCDSYV--PCAPSPCVNGGTCRQTGDTFECNCLPGFEGSTC-ERNIDDCPN--    | 266  |
| Q04721.3[H.sapiens]             | FTGQYCDLSYV--PCAPSPCVNGGTCRQTGDTFECNCLPGFEGSTC-ERNIDDCPN--   | 266  |
| XP_009243797.2[P.abelii]        | FTGQYCDLSYV--PCAPSPCVNGGTCRQTGDTFECNCLPGFEGSTC-ERNIDDCPN--   | 266  |



|                                 |                                                                |      |
|---------------------------------|----------------------------------------------------------------|------|
| XP_012554603.1[H.vulgaris]      | NLKVQSDSCTKMAAGSYSTGLEP-----TCRK-----C-DYGEY                   | 1596 |
| XP_019853114.1[A.queenslandica] | -----NPCNN-GTCVDKIGSFSCNCFPGYTQQCEEVIDMCQ---PQPCYNGAMC         | 306  |
| XP_032230096.1[N.vectensis]     | -----GWCNTGGVCSSEAGGVVTCSPKNTFGARCEIDVDECTTL-SQPCQNGGTC        | 135  |
| NP_001245510.1[D.melanogaster]  | -----HLCQNGGTCIDGISDYTCRCPPNFTGRFCQDDVDECAQRDHPVCQNGATC        | 349  |
| XP_019643529.1[B.belcheri]      | -----HLCENGAAACVDGVNEYTCTCPSEWQGRYCNEDVDECMQS-PNICLNSGTC       | 309  |
| XP_032815028.1[P.marinus]       | -----NRCDNAGTCVDGVNTYNCQCSPPQWTGGYCTEDVDECLQ-PNACLNGGTC        | 317  |
| XP_014025097.1[S.salar]         | -----HQCNRGGTCMDGVNTYNCQCPPEWTGQFCTEDVDECLQ-PNTCQNGGTC         | 319  |
| XP_018114267.1[X.laavis]        | -----HLCQNGGTCVDGVNTYNCRCPPQWTGQFCTEDVDECLQ-PNACQNGGTC         | 311  |
| NP_001238962.2[G.gallus]        | -----HNCQNGGICVDGVNTYNCRCPPQWTGQFCTEDVDECLQ-PNACQNGGTC         | 318  |
| NP_035058.2[M.musculus]         | -----HRCQNGGVCVDGVNTYNCRCPPQWTGQFCTEDVDECLQ-PNACQNGGTC         | 315  |
| Q04721.3[H.sapiens]             | -----HRCQNGGVCVDGVNTYNCRCPPQWTGQFCTEDVDECLQ-PNACQNGGTC         | 315  |
| XP_009243797.2[P.abelii]        | -----HRCQNGGVCVDGVNTYNCRCPPQWTGQFCTEDVDECLQ-PNACQNGGTC         | 315  |
|                                 | * . . *                                                        |      |
| XP_012554603.1[H.vulgaris]      | QSQVGAYNCIKCPYNLTSRSGSENISEKACQSPGTYSSSTGLEPCTKCAKGLFQNEIGR    | 1656 |
| XP_019853114.1[A.queenslandica] | VSSINGFDCFCRQ--GYTGQFCQVDIDECLSS-----PCQNGGNCCTEMVN            | 349  |
| XP_032230096.1[N.vectensis]     | SNVYGGVMCRCT--GWDGADCSVNIDECKQN-----DPFPRCQHGCTCVKIG           | 182  |
| NP_001245510.1[D.melanogaster]  | TNTHCSYSICIVN--GWAGLDCSNNTDDCKQA-----ACFYGATCIDGVC             | 392  |
| XP_019643529.1[B.belcheri]      | HNTVGGYSCVVCV--GWIGDDCSSENFDDCATA-----ACFHGATCHDRVG            | 352  |
| XP_032815028.1[P.marinus]       | HNTGGYNCVVCV--GWTGEDCSSENIDDCAIA-----ACFNAGATCHDRVA            | 360  |
| XP_014025097.1[S.salar]         | SNIQGSYTCVVCV--GWSGLDCSENIDDCATA-----ACTKGSTCIDRVA             | 362  |
| XP_018114267.1[X.laavis]        | TNSNGGYNCVVCV--GWSGDDCSQNIDDCATA-----ACANGSTCIDRVA             | 354  |
| NP_001238962.2[G.gallus]        | TNHNNGYACVVCV--GWSGDDCSKNIDDCFTA-----SCANGSTCIDRVA             | 361  |
| NP_035058.2[M.musculus]         | TNRNGGYGCVCV--GWSGDDCSSENIDDCAYA-----SCTPGSTCIDRVA             | 358  |
| Q04721.3[H.sapiens]             | ANRNGGYGCVCV--GWSGDDCSSENIDDCAFA-----SCTPGSTCIDRVA             | 358  |
| XP_009243797.2[P.abelii]        | ANRNGGYGCVCV--GWSGDDCSSENIDDCAFA-----SCTPGSTCIDRVA             | 358  |
|                                 | . . . * . . . : * *                                            |      |
| XP_012554603.1[H.vulgaris]      | SYCKLCPSSGIYLMGEA-----TSEANCPKSNACDE                           | 1688 |
| XP_019853114.1[A.queenslandica] | GFSCGCLPGYSGTQCEIDSCSSQPCQNDGTCIANGLTYSVCVSLDYTDENCTFTITPCYF   | 409  |
| XP_032230096.1[N.vectensis]     | SYTCICPPGKTLGLVCFND-----DECAS                                  | 205  |
| NP_001245510.1[D.melanogaster]  | SFYCQCTKGKTLGLCHLD-----DACTS                                   | 415  |
| XP_019643529.1[B.belcheri]      | FFMCECAPKGTGLLCHLD-----DACES                                   | 375  |
| XP_032815028.1[P.marinus]       | SFFCQCPGLKGTGLLCHLD-----DACVS                                  | 383  |
| XP_014025097.1[S.salar]         | SFLCVCPYKGTGLLCHVN-----DACIS                                   | 385  |
| XP_018114267.1[X.laavis]        | SFICVCPGKIGLGLCHKN-----DACFS                                   | 377  |
| NP_001238962.2[G.gallus]        | SFSCICPEGKAGLLCHLD-----DACVS                                   | 384  |
| NP_035058.2[M.musculus]         | SFSCLCPEGKAGLLCHLD-----DACIS                                   | 381  |
| Q04721.3[H.sapiens]             | SFSCMCPEGKAGLLCHLD-----DACIS                                   | 381  |
| XP_009243797.2[P.abelii]        | SFSCMCPEGKAGLLCHLD-----DACIS                                   | 381  |
|                                 | : * * *                                                        |      |
| XP_012554603.1[H.vulgaris]      | KPCRNGATCNAGN--YSYTCCKPGWTGVNCEVDIDEC---ASSPCGRHGTCTNLINDFN    | 1743 |
| XP_019853114.1[A.queenslandica] | EPCLNGATCINEDL-DNYTCSCLPGFTEEDCSVNIDDC---GSNFCQNEGTCTDLVNDYQ   | 465  |
| XP_032230096.1[N.vectensis]     | NPCSANATCVTS-FSGKASCICNSGWTGKNCDDVDIKECEG-DSSPCYHGGTCRDI PGSFV | 263  |
| NP_001245510.1[D.melanogaster]  | NPCHADAICTSPINGSYACSCATGYKGVDCSEDI DECDQ---GSPCEHNGICVNTPGSYR  | 473  |
| XP_019643529.1[B.belcheri]      | SPCNEGAICDTPNPVNGQPICTPCDGYAGQLCMQDIDECSL-GENPCEHDEGCNNVPGSFT  | 434  |
| XP_032815028.1[P.marinus]       | DPCHEGAICDTPNPINGKAICTCRAGFTGGACNQDVDECSI-GANPCEHGGRCINTQGSFR  | 442  |
| XP_014025097.1[S.salar]         | SPCRDGAQCDTPNPINGMFCNCAPGYIGSTCNDVNECII-GPNPCEHGGSCVNTDGSFT    | 437  |
| XP_018114267.1[X.laavis]        | NPCHIGSLCDTNPILTGQAICTCPPGYKGTACTEDIDECSLVNSNPCEHAGKCVNTEGSFY  | 444  |
| NP_001238962.2[G.gallus]        | NPCQKALCDTNPVNGHYICTCPQGHKGADCTEDVDECAMANSNPCEHAGKCVNTEGSFH    | 444  |
| NP_035058.2[M.musculus]         | NPCHKALCDTNPVNGQYICTCPQGYKGADCTEDVDECAMANSNPCEHAGKCVNTDGAFH    | 441  |
| Q04721.3[H.sapiens]             | NPCHKALCDTNPVNGQYICTCPQGYKGADCTEDVDECAMANSNPCEHAGKCVNTDGAFH    | 441  |
| XP_009243797.2[P.abelii]        | NPCHKALCDTNPVNGQYICTCPQGYKGADCTEDVDECAMANSNPCEHAGKCVNTDGAFH    | 441  |
|                                 | .* . : * * * * * . : . : *                                     |      |
| XP_012554603.1[H.vulgaris]      | CTCIKIGIIGKQCEINIDDKNDTCRNGGICNDLVDDFKCLCAAGFEGKRCEINKNECEPN   | 1803 |
| XP_019853114.1[A.queenslandica] | CDCSAGYTGSDQCTDIDECMLTPCFNNGTCTDLVNSVSCCEPPGFNGSLCQNNINECSSS   | 525  |
| XP_032230096.1[N.vectensis]     | CDVCPGFAGARCEBINECESNPVH-GLCLDYQNKFEACACSKGYTGRLCDVEINECDN     | 322  |
| NP_001245510.1[D.melanogaster]  | CNCSQGTGPRCETINECESHPCQNEGSLDDPGTFRVCVMPGFTGTQCEIDIDECQSN      | 533  |
| XP_019643529.1[B.belcheri]      | CTCTDGTGDRCEVINECASNPQNGTCTIDDIGEFRCACMPGFAGDLCECTDVDECASS     | 494  |
| XP_032815028.1[P.marinus]       | CQCTAGTGTGPRCETINECSMPCNDATCLDKIGFTCTCMPGFEGRHCEIDINECQSG      | 502  |
| XP_014025097.1[S.salar]         | CNCARGYDGRPCETIDINECASSPCQNDGTCLDRIGDYSCIMEGFEHGTCEIDINECASS   | 504  |
| XP_018114267.1[X.laavis]        | CECSKGTGTGPRCEMDINECLSEPCQNDATCLDKIGGFTCLCMPGYKGIHCEIEVDECLSN  | 497  |
| NP_001238962.2[G.gallus]        | CECLKGYTGPRCEMDINECHSNPCQNDATCLDKIGGFTCLCMPGFKGVHCEEDIDECCLN   | 504  |
| NP_035058.2[M.musculus]         | CECLKGAGPRCEMDINECHSDPCQNDATCLDKIGGFTCLCMPGFKGVHCELEVNQCQN     | 501  |
| Q04721.3[H.sapiens]             | CECLKGAGPRCEMDINECHSDPCQNDATCLDKIGGFTCLCMPGFKGVHCELEINECQSN    | 501  |
| XP_009243797.2[P.abelii]        | CECLKGAGPRCEMDINECHSDPCQNDATCLDKIGGFTCLCMPGFKGVHCELEINECQSN    | 501  |
|                                 | * * * * * : : * * * * * * * * * : : * *                        |      |
| XP_012554603.1[H.vulgaris]      | PCLKNSTCEDLINDFKNCIPGYVGLCDVDIDECAMSPCFNNATCVDKVNAFECKCQPG     | 1863 |
| XP_019853114.1[A.queenslandica] | PCSSGSTCIDEIDFPTCLCPMGLTGTQCDISIIDCSDMPCGNGNTCTDTPGGYECSSSG    | 585  |
| XP_032230096.1[N.vectensis]     | PCLNGGQCHDGLNYSTCQGVYVGEICQTNYYDCASNPCQNDGTQDGLAQYTCCLPLG      | 382  |
| NP_001245510.1[D.melanogaster]  | PCLNDGTCHDKINGFKSCALGFTGARCQINIDDCSQSPCRNRGICHDSIAGYSECPPG     | 593  |
| XP_019643529.1[B.belcheri]      | PCLN-GICRDGINKYCECDPGYEGTTCEVNIINECASGPCRNAGHCTDLVTAYTCTCLEG   | 553  |
| XP_032815028.1[P.marinus]       | PCLNDGNTDHNVGLCRCPGFTGPMQIDMDECASTPCLNGAKCVDRPNAYSECTEG        | 562  |
| XP_014025097.1[S.salar]         | PCLNQGTCLDQVVRVVCQPLGFSGEMCQIDIDECSSTPCLNGAKCIDRPNGYECECAEG    | 564  |
| XP_018114267.1[X.laavis]        | PCVNNGVCCVDKVNRFVCI CPGFTGPVCQIDIDDCSSTPCQNGAKCVDPHAGYDCLCATG  | 557  |
| NP_001238962.2[G.gallus]        | PCVNNGECLDKVNRFVLCVPPGFSGAVCQIDIDDCSSTPCLNGAKCIDHPNGYECQCATG   | 564  |
| NP_035058.2[M.musculus]         | PCVNNGQCVDKVNRFQCLCPGFTGPVCQIDIDDCSSTPCLNGAKCIDHPNGYECQCATG    | 561  |
| Q04721.3[H.sapiens]             | PCVNNGQCVDKVNRFQCLCPGFTGPVCQIDIDDCSSTPCLNGAKCIDHPNGYECQCATG    | 561  |
| XP_009243797.2[P.abelii]        | PCVNNGQCVDKVNRFQCLCPGFTGPVCQIDIDDCSSTPCLNGAKCIDHPNGYECQCATG    | 561  |
|                                 | ** . . * * : : * * * * * : . : * * * * * * * * : * * *         |      |
| XP_012554603.1[H.vulgaris]      | FNGTLC-----ETDIDECSTQPCANNGS                                   | 1886 |
| XP_019853114.1[A.queenslandica] | YTVHCMVNNIDCLPHPCNNGTCIDGINEYVICPEDYTGDNCTETPDHDCSNPCSSLAT     | 645  |
| XP_032230096.1[N.vectensis]     | FTGKSC-----                                                    | 388  |
| NP_001245510.1[D.melanogaster]  | YTGTSCEININDCDSNPCHRGKCIDVNSFKCLCDPGYTGTYICQKQINECESNPQFDDH    | 653  |
| XP_019643529.1[B.belcheri]      | FTGTDEINIDDCQSNQCQHGTCVDEVASFTCEPFGYNGPLCESPVDECDSDPCQNGGT     | 613  |
| XP_032815028.1[P.marinus]       | FAGLVCELNVNECQDPDCHHGKVDGIAFYCVCSPGYTGFLCDSQLNECQSSPCQNGGK     | 622  |
| XP_014025097.1[S.salar]         | FSGPLCKENIDDCDEPCHHGVCRDGIATFSCDCDPGYTGSI CNVQVMECHSNPCQNRGR   | 624  |
| XP_018114267.1[X.laavis]        | FTGVLCENINNCEPPCHYGTQDQIDSYTCICEPFGYMAICSDQIDECCHSNPCLNEGR     | 617  |
| NP_001238962.2[G.gallus]        | FTGVLCENINNCDPCHHGECQDQIDSYTCICNPGYMAICSEQINECHSNPCLHQGR       | 624  |
| NP_035058.2[M.musculus]         | FTGILCENIDNCDPCHHGQCDQIDSYTCICNPGYMAICSDQIDECYSSPCLNDGR        | 621  |

|                                 |                                                                |      |
|---------------------------------|----------------------------------------------------------------|------|
| Q04721.3[H.sapiens]             | FTGVLCEENIDNCDPDPCHHGQCQDGDIDSYTCICNPGYMGAIACSDQIDECYSSPCLNDGR | 621  |
| XP_009243797.2[P.abelii]        | FTGVLCEENIDNCDPDPCHHGQCQDGDIDSYTCICNPGYMGAIACSDQIDECYSSPCLNDGR | 621  |
|                                 | : * *                                                          |      |
| XP_012554603.1[H.vulgaris]      | CIDIVNGFLCKCIDGFRGSNCISINIDCDPSPCLHNSCTVDQINGFGQCECSPGYFGLRCE  | 1946 |
| XP_019853114.1[A.queenslandica] | CITNPGGYQCICPIDFTGTDFDQINDCQPNPCNNGGTCSDLIGTFNCSCPLGFEGSICE    | 705  |
| XP_032230096.1[N.vectensis]     | -----ETNTNECAGNPCMNMGTICIDGINSFRCQCPGLFTGNRCE                  | 427  |
| NP_001245510.1[D.melanogaster]  | CQDRVGSYYCQAGTSGKNCENVNNECHSNPCNNGATCIDGINSYKCCQCPGFTGQHCE     | 713  |
| XP_019643529.1[B.belcheri]      | CEDLVNGYRCNCLPGTSGDNCEVNQDDCTGNLCVHG-VQDGLNTYTCMCDGGYEGENCE    | 672  |
| XP_032815028.1[P.marinus]       | CVDLVNRYHCQCLEGTGVCNEFTNFDDCAGELCQQRG-KCVDGNEYRCLCDAGYTGLOCD   | 681  |
| XP_014025097.1[S.salar]         | CIDLNVKYQCNCPLPGTSGVNCENFNVDDCASNPCEYG-ECQDGINEYKVCVAPGYTGAKCD | 683  |
| XP_018114267.1[X.laevis]        | CVDLVNGYQCNCPLPGTSGPRCEKNVDDCASNPCTYG-NCVDGINRYDCVCSPGFTGPQCK  | 676  |
| NP_001238962.2[G.gallus]        | CIDLNVGYQCNCPLPGTSGVNCENFDDCASNPVHG-DCIDGINRYNCACKPGFTGPRCN    | 683  |
| NP_035058.2[M.musculus]         | CIDLNVGYQCNCQPGTSGLNCEINFDDCASNPCHMG-VCDGINRYSCVCSPGFTGQRGN    | 680  |
| Q04721.3[H.sapiens]             | CIDLNVGYQCNCQPGTSGVNCINFDDCASNPCHMG-ICMDGINRYSCVCSPGFTGQRGN    | 680  |
| XP_009243797.2[P.abelii]        | CIDLNVGYQCNCQPGTSGVNCINFDDCASNPCHMG-ICMDGINRYSCVCSPGFTGQRGN    | 680  |
|                                 | : : * . * * * : : * * * : * *                                  |      |
| XP_012554603.1[H.vulgaris]      | TEINECESQPSCNNATCVDKINDYQCLCNIGFEKQCEIDINECQNPNCVN-GSCKDLVG    | 2005 |
| XP_019853114.1[A.queenslandica] | YDINECASLPCLNGNCTDLNVNGYSCSCPFGFNGT-----                       | 740  |
| XP_032230096.1[N.vectensis]     | TEIDECESSPCQNGGTCKDKINGVYVICPPGASG-----                        | 461  |
| NP_001245510.1[D.melanogaster]  | KNVDECISPPCANNGVCIQVNGYKCECPRGFYDAHLSDVDECASNPVNEGRCEDEGIN     | 773  |
| XP_019643529.1[B.belcheri]      | SEIDECASSPCHNGGICHDLVNAFSCPCPGYHDLCLCYSNVNECESSPCEH-GTCQDGIN   | 731  |
| XP_032815028.1[P.marinus]       | VELNECESSPCHNGGSKDLVDAFEVCVCLPGFHPGLCYSETDACYASPCILH-GTCLDHGE  | 740  |
| XP_014025097.1[S.salar]         | VDIHECNSSPCMSGGTCTVDKVNFGICQCPFGTHGPLCHSGTDHCAPOPCVH-GDCVEQQS  | 742  |
| XP_018114267.1[X.laevis]        | DDIDECASSPCHNGGTCTVNEQNRFRCICPEGFRQPSCFSQSDECVNPNCH-GNCTDDVN   | 735  |
| NP_001238962.2[G.gallus]        | VDIDECASSPCNNNGGTCTINEVNGFRVCPEGYHHPHCQSQADGCLSNPCVH-GNCTHIVS  | 742  |
| NP_035058.2[M.musculus]         | IDIDECASNPCKRGATCINDVNGFRVCICPEGPHHPCSYQVNECLSNPCH-GNCTGGLS    | 739  |
| Q04721.3[H.sapiens]             | IDIDECASNPCKRGATCINGVNGFRVCICPEGPHHPCSYQVNECLSNPCH-GNCTGGLS    | 739  |
| XP_009243797.2[P.abelii]        | IDIDECASNPCKRGATCINGVNGFRVCICPEGPHHPCSYQVNECLSNPCH-GNCTGGLS    | 739  |
|                                 | : : * * * * . . . * : : * * *                                  |      |
| XP_012554603.1[H.vulgaris]      | DYLCECQPGFDRNCNSNL-IDNCFSLPCKNNGNCTNKVNNYTCTCQAGFSGSDCETNINE   | 2064 |
| XP_019853114.1[A.queenslandica] | -----CENSTITTTCESVVCENGMCDDTPTGFECLCPNGYTGYPYQNNIDD            | 787  |
| XP_032230096.1[N.vectensis]     | -----THCEND-PNDCEPANACQNGGVCIDGMNTYSCKCHPGTGFSGVFPVNE          | 508  |
| NP_001245510.1[D.melanogaster]  | EFICHCPPGYTGKRCELD-IDCESSNPCQHGHTCYDKLNAFSCQMPGYTGQKCEINIDD    | 832  |
| XP_019643529.1[B.belcheri]      | DYTCCTCTGYEGKNCNVN-IDECASNPCQHEGQCDGIGRYECQCLPGYEGVNCQINTDE    | 790  |
| XP_032815028.1[P.marinus]       | SYRCACEAGWTGPLCEVD-IDCESSPCQNGGACQHELDGTYCRCRDGFKGPTCQKNVNE    | 799  |
| XP_014025097.1[S.salar]         | GYNCECDSPGWGQHCQDE-KDECSPPCQSHSGSCVDRLNGYSCQCRPGFTGVNCEFNME    | 801  |
| XP_018114267.1[X.laevis]        | GYKCLCQPGWNGKKEVD-KNECLSDPCQNGGTCDLVNGYRCSCKKGFKGYNCQIDTNE     | 794  |
| NP_001238962.2[G.gallus]        | GYKVCVDPGWIGDYCSTE-GNECKSNPCQNGGTCEDDLNGYRCTCRKGFKGYNVCQ----   | 796  |
| NP_035058.2[M.musculus]         | GYKCLCDAGWVGVNCEVD-KNECLSNPCQNGGTCTNNLVNGYRCTCKKGFKGYNQVNI     | 798  |
| Q04721.3[H.sapiens]             | GYKCLCDAGWVGINCEVD-KNECLSNPCQNGGTCDNLVNGYRCTCKKGFKGYNQVNI      | 798  |
| XP_009243797.2[P.abelii]        | GYKCLCDAGWIGINCEVD-KNECLSNPCQNGGTCDNLVNGYRCTCKKGFKGYNQVNI      | 798  |
|                                 | * . * : * : * * : : * * * : * *                                |      |
| XP_012554603.1[H.vulgaris]      | CDPDPSCSNALNCTDLINGYICYCKLGRGENCSEIIDNCPQPCRNHSTCTNRFTVND-     | 2123 |
| XP_019853114.1[A.queenslandica] | CLSNPCLNN-ATCIDIANYTECECTEGFDGRNCAIDTDLCSQPQCFNGGTSETSD--SF    | 844  |
| XP_032230096.1[N.vectensis]     | CASSPCRNNG-GTCEDGVAQYRCRCDGYTGKNCVEVRIDSCIDHTCQNGASCVSSTP----  | 563  |
| NP_001245510.1[D.melanogaster]  | CVTNPCQNGG-GTCDKVNKYKCVCKVPFTGRDCESKMDPCASNRCNKAECTPSSNFLDF    | 891  |
| XP_019643529.1[B.belcheri]      | CGSNPCQNGG-GQCLDGVNNGYQCHCELPFVGINQCIELAPCNPNPCANSNGSCIPADYQTF | 849  |
| XP_032815028.1[P.marinus]       | CVSNPCLNLR-GTCVDGVAGYTCCLTLPFTGRNCEAVMAPCASQPCNNAATCKESVNLSSF  | 858  |
| XP_014025097.1[S.salar]         | CASSPCRNH-GTCDVGNTYISCLDPPYSKGHCEELVPCASHPCERGVCQPTPDYTFY      | 860  |
| XP_018114267.1[X.laevis]        | CASNPCLNH-GTCRDGINGYTCCHALPYTGTCNQILTPCSPEPCHNGGICQESDFKSF     | 853  |
| NP_001238962.2[G.gallus]        | -----VVVAPCSPPDCENSIGICQESPDSEGY                               | 822  |
| NP_035058.2[M.musculus]         | CASNPCLNQ-GTCFDDVSGYTCCHMLPYTGKNCQTVLAPCSNPNCENAAVCKEAPNFESF   | 857  |
| Q04721.3[H.sapiens]             | CASNPCLNQ-GTCFDDISGYTCHVLPYTGKNCQTVLAPCSNPNCENAAVCKEAPNFESY    | 857  |
| XP_009243797.2[P.abelii]        | CASNPCLNQ-GTCFDDISGYTCHVLPYTGKNCQTVLAPCSNPNCENAAVCKEAPNFESY    | 857  |
|                                 | * . * . . *                                                    |      |
| XP_012554603.1[H.vulgaris]      | -----                                                          | 2123 |
| XP_019853114.1[A.queenslandica] | FCTCPLGYFGSHCQNTLDPCS-SSPCLNSGICTNVNGTNFSCACSQAYGGERCEIKLFPD   | 903  |
| XP_032230096.1[N.vectensis]     | -----Y-----                                                    | 563  |
| NP_001245510.1[D.melanogaster]  | SCTCKLGYTGRYCEDIDECSSSPCRNGASCLNVPG-SYRCLCTKGYEGRDCAIN-TDD     | 949  |
| XP_019643529.1[B.belcheri]      | TCDCAEFGFEGETCADDINECQ-SNPCKNGAPCINLEG-DFRCDCLTGFSGELCSVN-IDD  | 906  |
| XP_032815028.1[P.marinus]       | SCACPPGWRGATCSLIDIECA-GAPCQHGGAAMNTQG-GFRCSRPGYTGPTCQTD-IDD    | 915  |
| XP_014025097.1[S.salar]         | TCRCPRGQWGPRCTDVIDECL-KNPCNRRARCINSQG-SYVCKCRPGYSGLNCQTN-IDD   | 917  |
| XP_018114267.1[X.laevis]        | SLCLCATGWQQRCTIDVDECV-TNPCRNYGRQCNTKG-GYKCHCPDGFSGFNCENN-IDD   | 910  |
| NP_001238962.2[G.gallus]        | TCQCAPGWEGERCTVIDIECL-SKPCRNHALCHNIQG-SYLCECRPGFTGGDCDSN-IDD   | 879  |
| NP_035058.2[M.musculus]         | SLCLAPGWQQRCTVDVDECI-SKPCMNHGVCHNTQG-SYVCECPGFSGMDCEED-IDD     | 914  |
| Q04721.3[H.sapiens]             | TCLCAPGWQQRCTIDIECI-SKPCMNHGLCHNTQG-SYMCECPGFSGMDCEED-IDD      | 914  |
| XP_009243797.2[P.abelii]        | TCLCAPGWQQRCTIDIECI-SKPCMNHGLCHNTQG-SYMCECPGFSGMDCEED-IDD      | 914  |
|                                 |                                                                |      |
| XP_012554603.1[H.vulgaris]      | -----FHNCNSLGYEGDRCEIEIDECKALPCKN                              | 2151 |
| XP_019853114.1[A.queenslandica] | CLDMPCLNNGTCAELVGSNGIGSGAGEPGPRIYQCPLGYAGEFCENITDLCVSSPCKN     | 963  |
| XP_032230096.1[N.vectensis]     | -----Y-----AYSQCCKPGYTGQYCEITDVIDECAARPCVN                     | 593  |
| NP_001245510.1[D.melanogaster]  | CASFPCQNGTCLDGI-----DYSCLCVDGFDGKHCEITDINECLSQPCQN             | 995  |
| XP_019643529.1[B.belcheri]      | CDPDPCHNGGTCTNDGIN-----SYTSCMPGFGGTNCEEDIDECYSNPQCN            | 952  |
| XP_032815028.1[P.marinus]       | CSPNPCCQNGSGCTDGVG-----AFSCKCRPGFRGSRCETEVNECASNPCKN           | 961  |
| XP_014025097.1[S.salar]         | CSPNPCLNGSGCVDEVG-----GFSCDRCQFGDGERCEAEVDECAASQPCQN           | 963  |
| XP_018114267.1[X.laevis]        | CLSNPCQNGASCLDGIN-----TFSCNCLAGFHGDKCQTDVDECAASNPCKN           | 956  |
| NP_001238962.2[G.gallus]        | CLSNPCQNGASCVDGIN-----SFSCICLPGFHGDQCTDTNECLSEPCRN             | 925  |
| NP_035058.2[M.musculus]         | CLANPCQNGGSCVDHVN-----TFSCQCHPGFTGDKCQTDMECLSEPCRN             | 960  |
| Q04721.3[H.sapiens]             | CLANPCQNGGSCMDGVN-----TFSCCLCPGFTGDKCQTDMECLSEPCRN             | 960  |
| XP_009243797.2[P.abelii]        | CLANPCQNGGSCVDGVN-----AFSCLCLLGTGDKCQTDMECLSEPCRN              | 960  |
|                                 | * * * : * * : : * * *                                          |      |
| XP_012554603.1[H.vulgaris]      | GGNCTDLPGKYLCTCPPGFTGVDCEINIDCKN--VSCLNGGKCIDLINSYVCECPVTHK    | 2209 |
| XP_019853114.1[A.queenslandica] | NATCIGDSANFTCTCLPGFTGTLCETELTGCHTELYPCLNGGECMEMDQGFMCNAPGFT    | 1023 |
| XP_032230096.1[N.vectensis]     | G-ACVDGVNGFICRCDPGFTGDRQCINVDQCS--SPCVHGGSCIDSINTYTCQCPKGFT    | 650  |
| NP_001245510.1[D.melanogaster]  | GATCSQVNSYTYCTCLPGFSGINCQTNDECTE--SSCLNGGSCIDGINGYNCSCLAGYS    | 1053 |
| XP_019643529.1[B.belcheri]      | GGQCIDAVNGYACDVLGFTGNTCQTNKDDCTS--SSCFSGGTCTIDINTTCQCPKGFT     | 1010 |
| XP_032815028.1[P.marinus]       | GGSCADVNSYTCRCRPGFNHCEHDIETCTD--SSCLNGGSCVDGINAYTCLCRGGFT      | 1019 |
| XP_014025097.1[S.salar]         | GAUCRDYVNSFVVCVRPGFDGILCEHNIPECTE--SSCLMNGTCVDDINTFSCRCRPGFY   | 1021 |

|                                 |                                                               |      |
|---------------------------------|---------------------------------------------------------------|------|
| XP_018114267.1[X.laewis]        | GGSCDTYVNSYTKCKQPGFDGIHCNNIDECD--TSCFNGATCVDGVNSFSCQCPQGFT    | 1014 |
| NP_001238962.2[G.gallus]        | GGTCTHYVNSYTKCKQPGFEGTNCENNIDECE--SSCFNGGTCVDGINSFTCCQCPVGFT  | 983  |
| NP_035058.2[M.musculus]         | GGTCSDYVNSYTKCTCPAGFHGVHCENNIDECE--SSCFNGGTCVDGINSFSCCLCPVGFT | 1018 |
| Q04721.3[H.sapiens]             | GGTCSDYVNSYTKCKQAGFDGVHCENNINECTE--SSCFNGGTCVDGINSFSCCLCPVGFT | 1018 |
| XP_009243797.2[P.abelii]        | GGTCSDYVNSYTKCKQAGFDGVHCENNINECTE--SSCFNGGTCVDGINSFSCCLCPVGFT | 1018 |
|                                 | . * : * * * * * : : * . . . * : . : * * .                     |      |
| XP_012554603.1[H.vulgaris]      | GKHCEKKIPDDVDI-----TFPGGDSYIKHCVKGNASKEFSISLWFRFLGRSRGVFLN    | 2263 |
| XP_019853114.1[A.queenslandica] | GPLCGYGINECRNQPCNLNGGTCRDFFRYYVICPPNFTGTDCES-----MID          | 1070 |
| XP_032230096.1[N.vectensis]     | GPRCIHIHNECSSDPCQHGGTCSDRIGSYSCYCRPGYTGSNCQH-----PLD          | 697  |
| NP_001245510.1[D.melanogaster]  | GANCCYKLNKCDSPNCLNGATCHEQNNIYTHCPSGFTGKQCSE-----YVD           | 1100 |
| XP_019643529.1[B.belcheri]      | GSNCQHEINECESHPCONGATCVDQTYGFCICTYGYEGVTCQN-----QKD           | 1057 |
| XP_032815028.1[P.marinus]       | GSYCQFDIDECESSQPCQHGGTCLDGLGYKCTCPRGYTGGNCQA-----LVD          | 1066 |
| XP_014025097.1[S.salar]         | GTFCHEYQNECDSQPCKNNGTCTDGLGSYRCTCPVYNGNQNCQN-----FVN          | 1068 |
| XP_018114267.1[X.laewis]        | GPFCLEINEECGSHPCINGGTCVDGMGTYHCTCPIGYRGNKEE-----LVD           | 1061 |
| NP_001238962.2[G.gallus]        | GPFCLEINEECDSHPCLNKGSCVSLGKYRCICPLGYTGKNCQT-----PMD           | 1030 |
| NP_035058.2[M.musculus]         | GPFCLEINEECSSNPCLNAGTCVDGLGYRCICPLGYTGKNCQT-----LVN           | 1065 |
| Q04721.3[H.sapiens]             | GSFCLHEINECSSHPCLNEGTCTVDGLGYRCSPLGYTGKNCQT-----LVN           | 1065 |
| XP_009243797.2[P.abelii]        | GSFCLHEINECSSHPCLNEGTCTVDGLGYRCSPLGYTGKNCQT-----LVN           | 1065 |
|                                 | * * . . : : * . . . : :                                       |      |
| XP_012554603.1[H.vulgaris]      | L--GFGCETVRPFLIMSHSSIRFQFRNQFSFVMDNLKINNEKLVINNGVWHHIYIALSS   | 2321 |
| XP_019853114.1[A.queenslandica] | PCTNIDCNGGSCI-----GDM-----GTYTCQCDPFGWTGLQCESEI               | 1106 |
| XP_032230096.1[N.vectensis]     | RCANDPCRNAGATC-----RRGTGDL-----SDFHCECPLGYKGTICDVKE           | 737  |
| NP_001245510.1[D.melanogaster]  | WCGQSPCENGATC-----SQMK-----HQFSCCKSAGWTGKLCVDVQT              | 1137 |
| XP_019643529.1[B.belcheri]      | LCASDFCRNGGTC-----TQSG-----DRYECLCEDEWTGLICDMTK               | 1094 |
| XP_032815028.1[P.marinus]       | WCSSSPCKNSGSC-----VQSR-----TSYRCDCHSGWTGLYCDIPN               | 1103 |
| XP_014025097.1[S.salar]         | LCSQPLCQNGGSC-----SQSE-----TTWLCHCPVGWTGMXCDVFN               | 1105 |
| XP_018114267.1[X.laewis]        | LCNGFPCKNKGIC-----KQVK-----TEPKCICPTGWTGYCDIPD                | 1098 |
| NP_001238962.2[G.gallus]        | LCSSPCKNKGTC-----FQSG-----AQTRCDPCSGWTGAYCDVFN                | 1067 |
| NP_035058.2[M.musculus]         | LCSSPCKNKGTC-----VQEK-----ARPHCLCPPGWDGAYCDVFN                | 1102 |
| Q04721.3[H.sapiens]             | LCSSPCKNKGTC-----VQKK-----AESQCLCPSGWAGAYCDVFN                | 1102 |
| XP_009243797.2[P.abelii]        | LCSSPCKNKGTC-----VQKK-----AESQCLCPSGWAGAYCDVFN                | 1102 |
|                                 | * . . : :                                                     |      |
| XP_012554603.1[H.vulgaris]      | VTLNFKVVLGGIIVQEEQKAELSGMTFFNESGTILIGKSLLDGKLIESGFIGDVSQVALF  | 2381 |
| XP_019853114.1[A.queenslandica] | NECDGVD-----C-----TNGTCV-DLINNYTCQCSGFTGQFCEINID              | 1144 |
| XP_032230096.1[N.vectensis]     | VSCAVA-----GTIC-----ANGGTCF-DSNGVQSCCTCKPGFTGSYCRNTID         | 778  |
| NP_001245510.1[D.melanogaster]  | ISCDQAADRKGLSLRQLC-----NN-GTCK-DYGNSHVCYCSQGYAGSYCKEID        | 1185 |
| XP_019643529.1[B.belcheri]      | VSCAAAASERGVLLGELC-----QNGGSCV-DTGNSHNCCNCPAGYRGSYCSBEID      | 1143 |
| XP_032815028.1[P.marinus]       | MSCDTAARNKGLSVSHLC-----RHGGRCI-DAGNTHHCQCSRGFEGSYCEKEVD       | 1152 |
| XP_014025097.1[S.salar]         | MSCQDYAARNGIQVELVC-----KHSGRGV-NVGNHAGQCQCLPGYTGSCYCNEMVD     | 1154 |
| XP_018114267.1[X.laewis]        | VSCVEAASQRGVAVQDLC-----QHAGVCI-NTGFSHRCQCRQGYIGSYCEGELD       | 1147 |
| NP_001238962.2[G.gallus]        | VSCQVAASQRGITVDQLC-----QSSHCL-NVGNTHRCQCRVGYTGSYCEEQLD        | 1116 |
| NP_035058.2[M.musculus]         | VSCKAAALQKGVVPEHLC-----QHSIGCI-NAGNTHHCQCLPGYTGSYCEEQLD       | 1151 |
| Q04721.3[H.sapiens]             | VSCDIAASRRGVLEHLC-----QHSGVCI-NAGNTHYCCQCLPGYTGSYCEEQLD       | 1151 |
| XP_009243797.2[P.abelii]        | VSCDIAASRRGVLEHLC-----QHSGVCI-NAGNTHYCCQCLPGYTGSYCEEQLD       | 1151 |
|                                 | . . . * : * . . :                                             |      |
| XP_012554603.1[H.vulgaris]      | KRV-----LDS---TETAGL-VRNCSRNISDSIIPWVGLMADAGPNVSLLET          | 2424 |
| XP_019853114.1[A.queenslandica] | DCAGINCNGN-TCVDIGISYQCDCLLGYTGPSCDTIIDDCAG---MPCMNASCIDLFNN   | 1200 |
| XP_032230096.1[N.vectensis]     | ECAGKPCYKYGATCHADVANTCTCTAGFTGKNCININECAS---NPCQR-GSCLDLVNG   | 834  |
| NP_001245510.1[D.melanogaster]  | ECQSQPCQNGGTCRDILGAYECQCRQFQGCQNCENLIDDCAP---NPCQNGGTCRDVRN   | 1242 |
| XP_019643529.1[B.belcheri]      | ECASSPCQNGAQCRDGLGTYSVCRCRAGYQGVNCEQEINECIS---NPCQNGGTCIDMVNE | 1200 |
| XP_032815028.1[P.marinus]       | ECSNPNCHNGATCRNFGSYKCECPVGYHGLNCDYENECLS---QPCQNGGTCIDLVNR    | 1209 |
| XP_014025097.1[S.salar]         | ECLSNPCRNAGATCMDYQGTCECMCKAGYQGVNCEYDVECHS---NPCHHGGTCINLINR  | 1211 |
| XP_018114267.1[X.laewis]        | ECASNPCQNSAACVDRHGGYECKCLPGYQGVNCEYEIDEQCL---QPCNNGGTCVDLVNQ  | 1204 |
| NP_001238962.2[G.gallus]        | ECDSPPCQNGATCRDLGGYQCECPVGYQGVNCEYEVDEQCF---QPCQNGGTCIDLVNH   | 1173 |
| NP_035058.2[M.musculus]         | ECASNPCQHGATCNDFIGGYRCECPVGYQGVNCEYEVDEQCN---QPCQNGGTCIDLVNH  | 1208 |
| Q04721.3[H.sapiens]             | ECASNPCQHGATCSDFIGGYRCECPVGYQGVNCEYEVDEQCN---QPCQNGGTCIDLVNH  | 1208 |
| XP_009243797.2[P.abelii]        | ECVSNPCQHGATCSDFIGGYRCECPVGYQGVNCEYEVDEQCN---QPCQNGGTCIDLVNH  | 1208 |
|                                 | . * * . . . : . . .                                           |      |
| XP_012554603.1[H.vulgaris]      | WTCGTNVCPPEFTGKFCQTKIDKIPTTVVF-----CPSPIKVYTEESSVFVWTW        | 2472 |
| XP_019853114.1[A.queenslandica] | YTC---VCSGDTGRFCEVNIDDCINI-----NCNNGSCEDLINDHM--CNCFPGF       | 1246 |
| XP_032230096.1[N.vectensis]     | YLC---SCPKGYIGKHCEVNADDCFVN-----ACFNNGSCVDGIAEFK--CTCPPLGF    | 881  |
| NP_001245510.1[D.melanogaster]  | FSC---SCPPGTGMIIICEINKDDCKPG-----ACHNNGSCIDRVGGFE--CVCPQPGF   | 1289 |
| XP_019643529.1[B.belcheri]      | YRC---SCPPGTQGLLCEINNDCNCFAG-----ACYHDGTCVDGIGFT--CRCRPGY     | 1247 |
| XP_032815028.1[P.marinus]       | FNC---VCPPGTGQRLCEINTDDCNPGDPAMPGPGRFCFNGGSCVDGVGSFT--CSCPPGF | 1264 |
| XP_014025097.1[S.salar]         | FSC---ACPPGTNGVQCEVNDDCAPKPG--SWELRCLNGGQCVGVGGRYT--CSCPPGF   | 1264 |
| XP_018114267.1[X.laewis]        | FRC---SCPPGTGRGLCEENIDDCAPSAE-----GPHCFNGGRCIDRIGGYR--CECLPGF | 1255 |
| NP_001238962.2[G.gallus]        | FRC---SCPPGTGRGLCEENVDCCISESG---GPRCFNGGQCIDQIGGYS--CLCLPGF   | 1224 |
| NP_035058.2[M.musculus]         | FKC---SCPPGTGRGLCEENIDEC---AG---GPHCLNGGQCVDRIGGYT--CRCLPGF   | 1256 |
| Q04721.3[H.sapiens]             | FKC---SCPPGTGRGLCEENIDDC---AR---GPHCLNGGQCMRIGGYS--CRCLPGF    | 1256 |
| XP_009243797.2[P.abelii]        | FKC---SCPPGTGRGLCEENIDDC---AR---GPHCLNGGQCMRIGGYS--CRCLPGF    | 1256 |
|                                 | : * * * * * : : * . . . : :                                   |      |
| XP_012554603.1[H.vulgaris]      | KEPQFDDDVAVVEVIRSHSPNGLFSWGDYVITYI-----AK-DAFE                | 2512 |
| XP_019853114.1[A.queenslandica] | TDQRCETDINECDGN-PCNDG---TCTDGINSFSCSCPPDYTGDTCDTEINLCLMEQFCL  | 1302 |
| XP_032230096.1[N.vectensis]     | SGSRCEVDVDECASS-PCSALGTEKCNINNGAYHCQKQGLGRHCDLNECLSL-YPGR     | 939  |
| NP_001245510.1[D.melanogaster]  | VGARCEGDINECLSN-PCSNAGTLDCVQLVNNYHCNCRPHGMGRHCEHKVDFCAQ-SPCQ  | 1347 |
| XP_019643529.1[B.belcheri]      | VGPRCEGDVNECLSN-PCDAEGTQDCVQLENDYRCDCKPGYTGRCERTVDSCE-SDPCL   | 1305 |
| XP_032815028.1[P.marinus]       | VGERCEGDVNECLSN-PCDPRGSLDCIQLVNDYKQCRCRPGFTGHNCVINTCRL-EPGR   | 1322 |
| XP_014025097.1[S.salar]         | AGEHCEGDVNECLSG-PCSPGSLDCVQLANDYQCRCLRYGTGRHCESMVLDCCS-KPCH   | 1322 |
| XP_018114267.1[X.laewis]        | AGERCEGDVNECLSS-PCSSGSLDCIQLANNYLCKCKPVFTGRHCETIQDLCP-SRPL    | 1313 |
| NP_001238962.2[G.gallus]        | AGERCEGDINECLSN-PCNPRGSLDCIQLINDYTCICRSATGRHCESVIDVCP-KPCQ    | 1282 |
| NP_035058.2[M.musculus]         | AGERCEGDINECLSN-PCSSGSLDCVQLKNNYCNICRSATGRHCETFLDVCP-KPCL     | 1314 |
| Q04721.3[H.sapiens]             | AGERCEGDINECLSN-PCSSGSLDCIQLTNDYLCVCRSAFTGRHCETFDVCPQ-MPCL    | 1314 |
| XP_009243797.2[P.abelii]        | AGERCEGDINECLSN-PCSSGSLDCIQLTNDYLCVCRSAFTGRHCETFDVCPQ-MPCL    | 1314 |
|                                 | : : * : : : :                                                 |      |
| XP_012554603.1[H.vulgaris]      | NSVSTCFEI-N-VTFPN-----CSE-----FQTANNSIH                       | 2539 |
| XP_019853114.1[A.queenslandica] | NNGTCTSDKIEGPIYNCSSVPLYSGDNCEQIN--SCSLSPCQNNATCTGNLTGDTYC     | 1360 |
| XP_032230096.1[N.vectensis]     | NGGCEKDA---GEYTCCLP-HGFSGDDCERRV-YTCSQPCLNSGTCT--VHNTYNC      | 991  |
| NP_001245510.1[D.melanogaster]  | NGGNCNIRQ---SGHHICCN-NGFYGNKCELSG-QDCDS-----                  | 1381 |

|                                 |                                                                |      |
|---------------------------------|----------------------------------------------------------------|------|
| XP_019643529.1[B.belcheri]      | NGGACSQSG----NNYVDCDQ-PGFGGDNCELVC-----D-----                  | 1335 |
| XP_032815028.1[P.marinus]       | NGGTCTMTV-NTLLGFTCLCA-PGYAGHACEDNA-YACGN-----                  | 1359 |
| XP_014025097.1[S.salar]         | NSGTCSMMN-SSVHGTYCICQ-PGFTGFNCGEVGYNCAK-----                   | 1360 |
| XP_018114267.1[X.laavis]        | NGGTCAVAV-NMPEGFTCCQP-SGFLGSKQYSN-NTCEH-----                   | 1350 |
| NP_001238962.2[G.gallus]        | NGGTCAVAS-NMPDGFICQCP-PGYSGAKCEFSSHSTCGQ-----                  | 1320 |
| NP_035058.2[M.musculus]         | NGGTCAVAS-NMPDGFICRCP-PGFSGARCG-----SSCGQ-----                 | 1348 |
| Q04721.3[H.sapiens]             | NGGTCAVAS-NMPDGFICRCP-PGFSGARCG-----SSCGQ-----                 | 1348 |
| XP_009243797.2[P.abelii]        | NGGTCAVAS-NMPDGFICRCP-PGFSGARCG-----SSCGQ-----                 | 1348 |
|                                 | *. *                                                           |      |
| XP_012554603.1[H.vulgaris]      | ACGTWKYGRFCDYKCH-----EKY-                                      | 2558 |
| XP_019853114.1[A.queenslandica] | HCSENNYGTHCER-FDYCHSNPCQNDGTICNGSPGNLISDTFLCICMPQFNNGSDCSMEL-  | 1418 |
| XP_032230096.1[N.vectensis]     | SCRPGVYGRKQCEWNKDECLSAPCRNNGGTCIDYGS-----YSCKPLGFAGANCEESI-    | 1044 |
| NP_001245510.1[D.melanogaster]  | -----NPCRVGNVVADEGF-----GYRCECPRGTLGEHCEIDT-                   | 1415 |
| XP_019643529.1[B.belcheri]      | -----RECKNRGQCLYTDGE-----FRCSCPSNYAGDSQCFHE-                   | 1368 |
| XP_032815028.1[P.marinus]       | -----LSCRNGGTCLPDRAA-----GPLCVCPRAWRGPECQYHSG                  | 1394 |
| XP_014025097.1[S.salar]         | -----LRCQNGHGCOETQVG-----RPHCRCPQFSGPRCETVH-                   | 1394 |
| XP_018114267.1[X.laavis]        | -----YKCKVGENCIQTHMG-----PRCYCPMGPAGYACQSNL-                   | 1383 |
| NP_001238962.2[G.gallus]        | -----VKCKKGEQCIHTSSG-----PRCYCPRLAVGEECQNT-                    | 1353 |
| NP_035058.2[M.musculus]         | -----VKCRRGECQIHTDSG-----PRCFCLNPK-----DCES-                   | 1376 |
| Q04721.3[H.sapiens]             | -----VKCRKGEQCVHTASG-----PRCFCPSPR-----DCES-                   | 1376 |
| XP_009243797.2[P.abelii]        | -----VKCRKGEQCVHTASG-----PRCFCPSPR-----DCES-                   | 1376 |
|                                 |                                                                |      |
| XP_012554603.1[H.vulgaris]      | -----ELAVPKPPFYVCGRPGTWSHGPT--YPENPDLLVSECT--                  | 2595 |
| XP_019853114.1[A.queenslandica] | -----SPCSDPCMMNGGTCVDEG--STRYQCQPVGYTGNNCEVFSSDTPYFNGDSY--     | 1468 |
| XP_032230096.1[N.vectensis]     | -----NECLSQPCKNNGGSCARDI--VNGYKCDPCSMKMGKNCETVV-----           | 1082 |
| NP_001245510.1[D.melanogaster]  | ----LDECSFNPCAQGAACEDL--LGDIYELCPKSKWKGRCDIYDANYPGWNGSGSGND    | 1469 |
| XP_019643529.1[B.belcheri]      | -----SNPCFSLPCYNNNGECQQTG-IDSYRCMCPEDYNGVLCEIYIPDVTP-----GP--- | 1415 |
| XP_032815028.1[P.marinus]       | GGGGSSACASSPCENGAAACEYEVPRFPYRCVCPPLFTGPRCVRVLGPKVPGDASS-GR--- | 1450 |
| XP_014025097.1[S.salar]         | -----SCQNRPCNLNGTCKMKDP-HYQYSCHCPAHFSGRHCENVIF-----            | 1433 |
| XP_018114267.1[X.laavis]        | -----GCASQPCKNNGVCQKRAQPPFYTCCHCPKGVVGPQCEIPI-----             | 1422 |
| NP_001238962.2[G.gallus]        | -----GCASAPCQNGGCHPRSPQPPYYQCFAHAGQSQCEQLV-----                | 1392 |
| NP_035058.2[M.musculus]         | -----GCASNPCQHGTCTYFQRPQPHYSCRCPPSFGGSHCELYT-----              | 1415 |
| Q04721.3[H.sapiens]             | -----GCASSPCQHGGSCHPQRPQPPYYSCQCAPFFSGSRCELYT-----             | 1415 |
| XP_009243797.2[P.abelii]        | -----GCASSPCQHGGSCHPQRPQPPYYSCQCAPFFSGSRCELYT-----             | 1415 |
|                                 | *                                                              |      |
| XP_012554603.1[H.vulgaris]      | --ATTPFNITITNKISFPTSSCDDSFKNDFV----E----S-----FKQLITELQDVW     | 2638 |
| XP_019853114.1[A.queenslandica] | --TLVPYSPNNNNSSQLINLHFTSSQSGLLLYISEEDHSSVLSLGIEAGLLSLMRQEG     | 1526 |
| XP_032230096.1[N.vectensis]     | -----KDQCPV-----PNCAKKFDGGKC-----NPKCNT-HECNWDGTCTSLG-IEPW     | 1123 |
| NP_001245510.1[D.melanogaster]  | RYAADLEQQRAMCDK---RGCTEKQNGNIC-----DSDCNT-YACNFDGNDCSLG-INPW   | 1519 |
| XP_019643529.1[B.belcheri]      | GVTMIPPHIEPSCPF---EHCASKARDGRC-----DEECNI-HECDWDGTDGALG-NNPW   | 1465 |
| XP_032815028.1[P.marinus]       | ALPVPFPVLEESCPV---AECESHAGDGLC-----DRDCNN-HACAWDGGDCSLHFPSPW   | 1501 |
| XP_014025097.1[S.salar]         | ----DPSPSTPASCYP---VECEQHSQDKVC-----DPQCNS-HECQWDGGDCSLHWRQPW  | 1481 |
| XP_018114267.1[X.laavis]        | ---E-----TDRCHK---YQCEPKARDGYC-----DQECNI-HECLWDGGDCSLTMGDWP   | 1465 |
| NP_001238962.2[G.gallus]        | ---HPSQE-PLGCLD---SQCAEKARDGYC-----DEDNT-HACQWDGGDCSLTMEDPW    | 1439 |
| NP_035058.2[M.musculus]         | ---APTSTPPATCQS---QYCADKARDGIC-----DEACNS-HACQWDGGDCSLTMEDPW   | 1463 |
| Q04721.3[H.sapiens]             | ---APPSTPPATCLS---QYCADKARDGVC-----DEACNS-HACQWDGGDCSLTMENPW   | 1463 |
| XP_009243797.2[P.abelii]        | ---APPSTPPATCLS---QYCADKARDGVC-----DEACNS-HACQWDGGDCSLTMENPW   | 1463 |
|                                 | :                                                              |      |
| XP_012554603.1[H.vulgaris]      | SICGTTCDKFKNIKVSCPKDAKRFRDMDPK-----WTGPKFILD-----SFD           | 2681 |
| XP_019853114.1[A.queenslandica] | SFIQSVARYHPVSDRWHYVEVTQNGLEIKTEIDGYPNSTSLIDMFLIFEPATYIGGFD     | 1586 |
| XP_032230096.1[N.vectensis]     | SNCTTV---TKSGKACYQVFANGVCDRECN-----GGCL-----FDGFD              | 1160 |
| NP_001245510.1[D.melanogaster]  | ANCTA-----NECWNKFKNGKNEECNN-----AACH-----YDGH                  | 1551 |
| XP_019643529.1[B.belcheri]      | ANCTSS-----LQCNWYFSNGHCDQCCNN-----EECL-----YDGR                | 1498 |
| XP_032815028.1[P.marinus]       | RNCVSR-----LQCNLRFNRGECDEQCNS-----LGCL-----FDGFD               | 1534 |
| XP_014025097.1[S.salar]         | VNCTAP-----VPCWELFRNGRCDPDCN-----SGCL-----FDSFE                | 1514 |
| XP_018114267.1[X.laavis]        | ANCSSS-----LRCWEYF-NGQCDELNT-----PECL-----FDNFE                | 1497 |
| NP_001238962.2[G.gallus]        | ANCSSS-----LRCWMLF-NGQCDEFNT-----PECL-----FDNFE                | 1471 |
| NP_035058.2[M.musculus]         | ANCTST-----LRCWEYI-NNQCDEQCN-----AECL-----FDNFE                | 1495 |
| Q04721.3[H.sapiens]             | ANCSSP-----LPCWDYI-NNQCDELNT-----VECL-----FDNFE                | 1495 |
| XP_009243797.2[P.abelii]        | ANCSSP-----LPCWDYI-NNQCDELNT-----AECL-----FDNFE                | 1495 |
|                                 | :                                                              |      |
|                                 | .                                                              |      |
| XP_012554603.1[H.vulgaris]      | ATNETNLAKIQNGIKTFKNMTVIVNNVSISSDLLNVEKTVCNNGSILKNDICVKCPAG     | 2741 |
| XP_019853114.1[A.queenslandica] | NYTSLPSAVLQSS---GF-IGYINATIQLGGEAL-----HIIDDSIAGRDI-           | 1629 |
| XP_032230096.1[N.vectensis]     | CKPSVP---KC---GA-----DKYCAARFA-                                | 1179 |
| NP_001245510.1[D.melanogaster]  | CERKLG-S-CDS---LF-----DAYCQKHYG-                               | 1572 |
| XP_019643529.1[B.belcheri]      | CEENFHPT--CNP---VY-----DTYCGNFR-                               | 1520 |
| XP_032815028.1[P.marinus]       | CQLGMK-N-CNP---LY-----NAYCTAHYA-                               | 1555 |
| XP_014025097.1[S.salar]         | CQESAQ-S---YC---KY-----DKYCAAHYA-                              | 1534 |
| XP_018114267.1[X.laavis]        | CQQKE--P---IC---KY-----DKYCEDHYA-                              | 1516 |
| NP_001238962.2[G.gallus]        | CQQNS--R---MC---KY-----DKYCADHYG-                              | 1490 |
| NP_035058.2[M.musculus]         | CQRNS--K---TC---KY-----DKYCADHFK-                              | 1514 |
| Q04721.3[H.sapiens]             | CQGNS--K---TC---KY-----DKYCADHFK-                              | 1514 |
| XP_009243797.2[P.abelii]        | CQGNS--K---TC---KY-----DKYCADHFK-                              | 1514 |
|                                 | :                                                              |      |
|                                 | .                                                              |      |
| XP_012554603.1[H.vulgaris]      | TFKNVTNELCEKCPFGSYSKEAGSEMC---INCPANT--TTTSEGSTEESCKVKCLFG     | 2795 |
| XP_019853114.1[A.queenslandica] | -----HGEA---AG---SCGPETCSNGGICVEES-----                        | 1652 |
| XP_032230096.1[N.vectensis]     | -----NAEC---DA---ICNNVACQNDGLDCSFKK--PEIVEGTL-----VLV----      | 1214 |
| NP_001245510.1[D.melanogaster]  | -----DGFC---DY---GCNNAECSDWGLDCENKTQSPVLAEGAM-----SVV----      | 1609 |
| XP_019643529.1[B.belcheri]      | -----DGNL---DS---GCNNLECGYDGGDCDEY-PPVTAKGYL-----VMI----       | 1556 |
| XP_032815028.1[P.marinus]       | -----DQHC---DQ---GCNSEDGWDGDCAGEV-PERLADGVL-----VLI----        | 1591 |
| XP_014025097.1[S.salar]         | -----NKIC---DK---GCNTEACGWDGLDCSGDT-PAEVADGTL-----VIV----      | 1570 |
| XP_018114267.1[X.laavis]        | -----NGHC---DK---SCNTKECGWDGLDCSTDR-PENLAEGTL-----VVV----      | 1552 |
| NP_001238962.2[G.gallus]        | -----DGRG---DQ---GCNSEECGWDGLDCAGDK-AERLAEGTL-----IIV----      | 1526 |
| NP_035058.2[M.musculus]         | -----DNHC---DQ---GCNSEECGWDGLDCASQ-PENLAEGTL-----IIV----       | 1550 |
| Q04721.3[H.sapiens]             | -----DNHC---DQ---GCNSEECGWDGLDCAADQ-PENLAEGTL-----VIV----      | 1550 |
| XP_009243797.2[P.abelii]        | -----DNHC---DQ---GCNSEECGWDGLDCAADQ-PENLAEGTL-----VIV----      | 1550 |
|                                 | *                                                              |      |
| XP_012554603.1[H.vulgaris]      | AYLENNECKDCPIGFYKETAGFEKQCPALGLTTKTKTGAUTKQCKNDCTLGQELVNNTC    | 2855 |

|                                 |                                                              |      |
|---------------------------------|--------------------------------------------------------------|------|
| XP_019853114.1[A.queenslandica] | -----QSSFL-----CLC-----                                      | 1660 |
| XP_032230096.1[N.vectensis]     | LLV-----VPEAFMNGSRVFM-----RELSRTL-----                       | 1237 |
| NP_001245510.1[D.melanogaster]  | MLM-----NVEAFREIQAQFL-----RNMSHML-----                       | 1632 |
| XP_019643529.1[B.belcheri]      | VAA-----PPEVLLNNSISFL-----RMLSIIIL-----                      | 1579 |
| XP_032815028.1[P.marinus]       | MLL-----PPARVHNSANFL-----RQLGSL-----                         | 1614 |
| XP_014025097.1[S.salar]         | VLL-----QPEELMGDMGRFL-----RSLGTLL-----                       | 1593 |
| XP_018114267.1[X.laavis]        | VLM-----PPSELLKNSRNFL-----RVLGSL-----                        | 1575 |
| NP_001238962.2[G.gallus]        | VLM-----RPDELLRDRVSFL-----RTLGTLL-----                       | 1549 |
| NP_035058.2[M.musculus]         | VLL-----PPEQLQDSRSFL-----RALGTLL-----                        | 1573 |
| Q04721.3[H.sapiens]             | VLM-----PPEQLQDARSFL-----RALGTLL-----                        | 1573 |
| XP_009243797.2[P.abelii]        | VLM-----PPEQLQDARSFL-----RALGTLL-----                        | 1573 |
|                                 | *                                                            |      |
| XP_012554603.1[H.vulgaris]      | QPCRMGYRRNNSDQFVCLPCPNYQST-YQLGATSP-VCY-AVCEVGKEIS-SDGLK---C | 2908 |
| XP_019853114.1[A.queenslandica] | ---PIGFRGDTCEQDTEIIVPYFNTRSYAIVSNDAFSLYGG---IDIDI-----TLHTS  | 1708 |
| XP_032230096.1[N.vectensis]     | ---NTIAFIKKDSEKELVKVYPLPPSAPVPAERRKRSAEKIWFIDSDLTESHRRFRAAV  | 1294 |
| NP_001245510.1[D.melanogaster]  | ---RTTVRLKDALGHDIIINWKNVVRPEIEDTD--FA-----RKNKILYTTQV        | 1677 |
| XP_019643529.1[B.belcheri]      | ---RSSMSFKVDEGNPMVYPWYGEVDETISKRAIRSVFR-----ALSGRYRRATES     | 1629 |
| XP_032815028.1[P.marinus]       | ---HATVRVKFIDTNGQDMIFPYQDEARGCGGFRLEAAR-----SLSRFVREMER      | 1662 |
| XP_014025097.1[S.salar]         | ---HTNLRVKMDDQKPMLYPYGLEHDDGNEG--QPST-----MTLRGKRELDK        | 1638 |
| XP_018114267.1[X.laavis]        | ---HTNLRKKNPDGSYMVFYFRENASSQSRRR--SLK-----LRVIREL-E          | 1618 |
| NP_001238962.2[G.gallus]        | ---HTNLRKLDGSGNPMVYPYGEKSAARSRR--SVV-----VVRKHRELEQ          | 1592 |
| NP_035058.2[M.musculus]         | ---HTNLRKQDSQGALMVYPYGEKSAAMKKQ--KMTR-----RSLPEEQEQEQ        | 1618 |
| Q04721.3[H.sapiens]             | ---HTNLRKRDGSGELMVYPYGEKSAAMKKQ--RMTR-----RSLPGEQ--EQ        | 1616 |
| XP_009243797.2[P.abelii]        | ---HTNLRKRDGSGELMVYPYGEKSAAMKKQ--RMTR-----RSLPGEQ--EQ        | 1616 |
|                                 | :                                                            |      |
| XP_012554603.1[H.vulgaris]      | MECAIGYKNNNNNAKTSCKCPAGLTTKQLASTSIDQCIEKSSDS-KYYDVQVAITSLTWS | 2967 |
| XP_019853114.1[A.queenslandica] | SPNGLIYYL-YDS-----TNVNDYFTLYLEEGGIG--                        | 1738 |
| XP_032230096.1[N.vectensis]     | QKNGVQVQINLNRG-CE-----TDCFQSTEQAAKYLGAQOSTGKLN--             | 1335 |
| NP_001245510.1[D.melanogaster]  | HQTGIQIYLEIDNRK-CT-----ECFTHAVEAAEFLAATAAKHQLR--             | 1717 |
| XP_019643529.1[B.belcheri]      | EVQGSIVYLEMDNSK-CY-----RVHDDCFETAKEAADFLAALFLHNGLS-          | 1673 |
| XP_032815028.1[P.marinus]       | PLIGSKVYVEIDNRH-CY-----QTSDRCFSSAADAALFLAAQATHG----          | 1703 |
| XP_014025097.1[S.salar]         | EVIGSKVYLEIDNRK-CE-----ERSMDCFSSTELAAAFIAEYKLS-----          | 1679 |
| XP_018114267.1[X.laavis]        | QPIGSKVSLEINNQE-CV-----MDSQDCFKTSESAALLAAHAVRG----           | 1659 |
| NP_001238962.2[G.gallus]        | EVIGTRVFLEIDNRQ-CA-----EDSEQCFHNTAAAAALLAAQAIKG--            | 1633 |
| NP_035058.2[M.musculus]         | EVIGSKIFLEIDNRQ-CV-----QDSQCFKNTDAAAALLASHAIQG-----          | 1659 |
| Q04721.3[H.sapiens]             | EVAGSKVFLEIDNRQ-CV-----QSDHCFKNTDAAAALLASHAIQG-----          | 1657 |
| XP_009243797.2[P.abelii]        | EVAGSKVFLEIDNRQ-CV-----QSDHCFKNTDAAAALLASHAIQG-----          | 1657 |
|                                 | :                                                            |      |
| XP_012554603.1[H.vulgaris]      | DNLNQNQSVVEYRDVAYKIIIE-----SVYGVYLNMSYLLFVNITKLSSGSVVANLT    | 3017 |
| XP_019853114.1[A.queenslandica] | -----IEYSMEGSAHIVSYQ-GNVS-DNEW--HMTVQLNTSGLYLILDGSLVLYS-     | 1785 |
| XP_032230096.1[N.vectensis]     | -----LPYPVYSVKTEEK---PTVEPETGFQPEPLWIALCVGVPFLFVIGVL--AG-    | 1381 |
| NP_001245510.1[D.melanogaster]  | -----NDQFIHSVRGINKPGDEDNGEPANVKYVITG-IILVIALAFFGMVLSTQ-      | 1767 |
| XP_019643529.1[B.belcheri]      | -----QLNYPVKLSYS---GDDPEPSTPTFNPLVYVVAAVGLLVMVGLVGLMTTK-     | 1722 |
| XP_032815028.1[P.marinus]       | -----SLPLPLLVGSS---EV-PDVVTAAPRVQVYVLLGLVLLVMVVLGVLVGRK-     | 1751 |
| XP_014025097.1[S.salar]         | -----ELPYPVVSVNS---DP-TEPY-KPNFLLYLAVGAA-VIILLILVLGVL-AAK-   | 1724 |
| XP_018114267.1[X.laavis]        | -----TLNYPVLSVEV---EN-APMS-HQTLM-YILPVTI-AIIVILLMVVV-LAK-    | 1703 |
| NP_001238962.2[G.gallus]        | -----MLPYPFVSVQS---EP-LLPP-KTQLL-YLLAVAA-LIILLILLGVM-MAK-    | 1677 |
| NP_035058.2[M.musculus]         | -----TLYSPLVSVS---EL-ESPR-NAQLL-YLLAVAV-VIILFFILLGVI-MAK-    | 1703 |
| Q04721.3[H.sapiens]             | -----TLYSPLVSVS---ES-LTPE-RTQLL-YLLAVAV-VIILFILLGVI-MAK-     | 1701 |
| XP_009243797.2[P.abelii]        | -----TLYSPLVSVS---ES-LTPE-RTQLL-YLLAVAV-VIILFILLGVI-MAK-     | 1701 |
|                                 | :                                                            |      |
| XP_012554603.1[H.vulgaris]      | LGFNSSVKDPLFAFDSAVKSQQFYKLTVPDPSLIADRCCKHIV-----CPMEQV----   | 3065 |
| XP_019853114.1[A.queenslandica] | ---NNATLSSIYL-TSP-----LFLGGLPNGLIADSVSGSL-NGCIRDVOISNTSLGL   | 1834 |
| XP_032230096.1[N.vectensis]     | ---GKRVYTKLWL-----PEGFVRPVPVH---RRLSLR <b>RPVVGQ</b> -HSM    | 1417 |
| NP_001245510.1[D.melanogaster]  | ---RRRAHGVTWF-----PEGFRAPAAVMSRR--- <b>RRDPHGQ</b> ---M      | 1800 |
| XP_019643529.1[B.belcheri]      | ---RRRESGQLWY-----PEGFKLTKEKRKDARRSTR <b>RRDPVQ</b> -HVM     | 1762 |
| XP_032815028.1[P.marinus]       | ---RRREQGTLWF-----PEGFILGPPSDKKK--- <b>RRFPVQ</b> QDVGM      | 1787 |
| XP_014025097.1[S.salar]         | ---RRKRKHGVLWL-----PDGFLAKD--DK--- <b>RRFPVQ</b> QDFGM       | 1757 |
| XP_018114267.1[X.laavis]        | ---RRKRKHGALWF-----PEGFFLHRENSNQ--- <b>RRFPVQ</b> QAVGM      | 1739 |
| NP_001238962.2[G.gallus]        | ---RRKRKHGSLWL-----PEGFILRRDPSNHK--- <b>RRFPVQ</b> QAVGL     | 1713 |
| NP_035058.2[M.musculus]         | ---RRKRKHGFLWL-----PEGFTLRDSSNHK--- <b>RRFPVQ</b> QAVGL      | 1739 |
| Q04721.3[H.sapiens]             | ---RRKRKHGSLWL-----PEGFTLRDASNHK--- <b>RRFPVQ</b> QAVGL      | 1737 |
| XP_009243797.2[P.abelii]        | ---RRKRKHGSLWL-----PEGFTLRDASNHK--- <b>RRFPVQ</b> QAVGL      | 1737 |
|                                 | :                                                            |      |
|                                 | *::                                                          |      |
|                                 | :                                                            |      |
| XP_012554603.1[H.vulgaris]      | CSYDTRV-ECKCTVGK-----QKSPDGE-K-CYDTCCLKGCPGQECFSNSTF---N     | 3111 |
| XP_019853114.1[A.queenslandica] | I-----ENNVLVYGL-----GLLECPQSLCLPLVQCLNGGTCVDSVSVFGF          | 1874 |
| XP_032230096.1[N.vectensis]     | RSMNKSSDLEEGAVGG-----DLTPPQEARDAKRVKLE-----EVD----           | 1454 |
| NP_001245510.1[D.melanogaster]  | RNLNKQVAMQSQGVGQ-----PGAHSDDSDMPLPKRQR-----SDPVSQV           | 1842 |
| XP_019643529.1[B.belcheri]      | KSFTFPQGATAANVDNDNETVRDSSAWEDDMVPPEAKRMKT-----QQPTPGS        | 1810 |
| XP_032815028.1[P.marinus]       | KTLSQSSVEDSLIDGNQ-----NEAWLDGSPVSTKRRKLE-----EQGM---         | 1826 |
| XP_014025097.1[S.salar]         | KNFKTQ--DGGMIDGG-----QRWMEEEP-PKKV RTE-----DKPL---           | 1791 |
| XP_018114267.1[X.laavis]        | KNLSVPIVDVNLDSNQ-----NDHWSDDRGPPKKSKSE-----GQAL---           | 1778 |
| NP_001238962.2[G.gallus]        | KNLSVQIPEGNMADSGP-----TEHWAGDGGPPKKRVKTE-----DQAL---         | 1752 |
| NP_035058.2[M.musculus]         | KNLSVQVSEANLIGSGT-----SEHWVDDEGPPKKAKAE-----DEAL---          | 1778 |
| Q04721.3[H.sapiens]             | KNLSVQVSEANLIGTGT-----SEHWVDDEGPPKKVKAE-----DEAL---          | 1776 |
| XP_009243797.2[P.abelii]        | KNLSVQVSEANLIGSGT-----SEHWVDDEGPPKKVKAE-----DEAL---          | 1776 |
|                                 |                                                              |      |
| XP_012554603.1[H.vulgaris]      | ECRCKDGG---VLS-----SDKKECIYTCEL-----KG-----                  | 3136 |
| XP_019853114.1[A.queenslandica] | ECSCPSGYNGTYCEVLLSTCIPNCLFDGVCDFNNMTYSCQCTL--GRQGRICDEELNI   | 1932 |
| XP_032230096.1[N.vectensis]     | -----ESQ-R-----VKVSEKEKDRQWTRLHREAADVTVRNCT-ALAL             | 1491 |
| NP_001245510.1[D.melanogaster]  | GL----GNNGGYASDHT-----MVSEYEEADQRVWSQAHLVDVVDVRA-----IM      | 1882 |
| XP_019643529.1[B.belcheri]      | -----DATADQ-----TLDYDDTDHRQWTQQHLEAADIRNPACLAQVAL            | 1850 |
| XP_032815028.1[P.marinus]       | -----L-----PEAEPEVDHRPWTQQHLEAADIRTPAL-VLAL                  | 1859 |
| XP_014025097.1[S.salar]         | -----L-----PMGVDGGVDRREWTLQHHKAADI-----SL                    | 1817 |
| XP_018114267.1[X.laavis]        | -----L-----LGGDDQVDSRQWTQQHLEAADIRMTPSL---AL                 | 1809 |
| NP_001238962.2[G.gallus]        | -----L-----PEADEIDQRQWTQQHLEAADVCGSTSL---AL                  | 1783 |
| NP_035058.2[M.musculus]         | -----L-----S-EDDPIDRRPWTQQHLEAADIRHTPSL---AL                 | 1808 |
| Q04721.3[H.sapiens]             | -----L-----SEEDDPIDRRPWTQQHLEAADIRHTPSL---AL                 | 1807 |
| XP_009243797.2[P.abelii]        | -----L-----SEEDDPIDRRPWTQQHLEAADIRHTPSL---AL                 | 1807 |

|                                 |                                                              |                                                      |      |
|---------------------------------|--------------------------------------------------------------|------------------------------------------------------|------|
|                                 |                                                              |                                                      |      |
| XP_012554603.1[H.vulgaris]      | C-----                                                       |                                                      | 3137 |
| XP_019853114.1[A.queenslandica] | TVPAFYGNISLAYSSLSITNVQSNLILSLTFKPTSPSGLLLFNHGSNTDFSQYVSISLV  |                                                      | 1992 |
| XP_032230096.1[N.vectensis]     | TPPQEGES-----EKPGLDITGDVARGPGGFT-----                        | PLHLASCR                                             | 1525 |
| NP_001245510.1[D.melanogaster]  | TPPA-HQ-----DGG--KHDVDARGPCGLT-----                          | PLMIAAVR                                             | 1912 |
| XP_019643529.1[B.belcheri]      | TPPQTEG-----EADPCSVDVNVVRGPDGLT-----                         | PLMLASFR                                             | 1883 |
| XP_032815028.1[P.marinus]       | TPPQGEA-----DD--GMDVNVVRGPNGFT-----                          | PLMVASFH                                             | 1889 |
| XP_014025097.1[S.salar]         | TPPQTDL-----EAD--CLDVNVVRGPDGFT-----                         | PLMLASLR                                             | 1848 |
| XP_018114267.1[X.laevis]        | TPPQAEQ-----DID--VIDVNVVRGPDGCT-----                         | PLMLASLR                                             | 1840 |
| NP_001238962.2[G.gallus]        | TPPQADQ-----EVD--VLDVNVVRGPDGCT-----                         | PLMLASLR                                             | 1814 |
| NP_035058.2[M.musculus]         | TPPQAEQ-----EVD--VLDVNVVRGPDGCT-----                         | PLMLASLR                                             | 1839 |
| Q04721.3[H.sapiens]             | TPPQAEQ-----EVD--VLDVNVVRGPDGCT-----                         | PLMLASLR                                             | 1838 |
| XP_009243797.2[P.abelii]        | TPPQAEQ-----EVD--VLDVNVVRGPDGCT-----                         | PLMLASLR                                             | 1838 |
|                                 |                                                              |                                                      |      |
| XP_012554603.1[H.vulgaris]      | -----                                                        |                                                      | 3137 |
| XP_019853114.1[A.queenslandica] | NSSVVY-----KFDLGSGLATISSPITLGLNQWHITITAYRTGRVG----           |                                                      | 2032 |
| XP_032230096.1[N.vectensis]     | CTLVDCCSIDD-----DKESDDSGAMVSDLLALGASYGA--RTDIEKETPLHLAAR     |                                                      | 1575 |
| NP_001245510.1[D.melanogaster]  | GGGLDTG-----E-----DIENNEDSTAQVISDLLAQGAELNA--TMDKTGETSLHLAAR |                                                      | 1960 |
| XP_019643529.1[B.belcheri]      | GGGLEYY-----ED-----HQEDGEDESANVITDMLMQGANINA--QDRTGETSLHLAAR |                                                      | 1932 |
| XP_032815028.1[P.marinus]       | GGGLDSSLCDDEESSDGLFEDGTDDGSANVITDLICQGAALHA--QDRTGETALHLAAR  |                                                      | 1947 |
| XP_014025097.1[S.salar]         | NGGASDCGLQAEED-----ESGGDEPCPNAISDLITQGATLMA--QDRTGETALHLAAR  |                                                      | 1902 |
| XP_018114267.1[X.laevis]        | MGSPhL-----EE-----DDEADDPANVITDLIYQGACQLA--QDRTGETALHLAAR    |                                                      | 1888 |
| NP_001238962.2[G.gallus]        | VGGSID-----SE-----DDEGEDSSANITDLIYQGANLQA--QDRTGEMALHLAAR    |                                                      | 1862 |
| NP_035058.2[M.musculus]         | GGSSDL-----SD-----EDEADDPANVITDLVYQGASLQA--QDRTGEMALHLAAR    |                                                      | 1887 |
| Q04721.3[H.sapiens]             | GGSSDL-----SD-----EDEADDPANVITDLVYQGASLQA--QDRTGEMALHLAAR    |                                                      | 1886 |
| XP_009243797.2[P.abelii]        | GGSSDL-----SD-----EDEADDPANVITDLVYQGASLQA--QDRTGEMALHLAAR    |                                                      | 1886 |
|                                 |                                                              |                                                      |      |
| XP_012554603.1[H.vulgaris]      | -----                                                        | PEGQECFSNSTFN--                                      | 3150 |
| XP_019853114.1[A.queenslandica] | FLRVNDEELLTNTSLGTNLGLNIAGDMWLGGTDRFNIISQHAGVGTGLTGCISSVSVNGI |                                                      | 2092 |
| XP_032230096.1[N.vectensis]     | HSRADAARLLDHAGA-----D--PNARDKLGRTPLHLAVGADAQGVFQILLRNR-      |                                                      | 1622 |
| NP_001245510.1[D.melanogaster]  | NP_001245510.1[D.melanogaster]                               | NP_001245510.1[D.melanogaster]                       | 2007 |
| XP_019643529.1[B.belcheri]      | YARADRAKRLLDAGA-----D--ANARDNTGRTPLHAAIASDAQGVFQILLRNR-      |                                                      | 1979 |
| XP_032815028.1[P.marinus]       | YARSDAAKRLLDAGA-----D--ANLPDNGMGRPLHAAVSADAQGVFQILLRNR-      |                                                      | 1994 |
| XP_014025097.1[S.salar]         | YARADAARLLLDAGA-----D--ANAHDNMGRTPHAAVAADAQGVFQILLRNR-       |                                                      | 1949 |
| XP_018114267.1[X.laevis]        | YSRADAARLLLDAGA-----D--ANSQDSMGRTPHAAVSADAQGVFQILLRNR-       |                                                      | 1935 |
| NP_001238962.2[G.gallus]        | NP_001238962.2[G.gallus]                                     | NP_001238962.2[G.gallus]                             | 1909 |
| NP_035058.2[M.musculus]         | YSRADAARLLLDAGA-----D--ANAQDNMGRCPHAAVAADAQGVFQILLRNR-       |                                                      | 1934 |
| Q04721.3[H.sapiens]             | YSRADAARLLLDAGA-----D--ANAQDNMGRCPHAAVAADAQGVFQILLRNR-       |                                                      | 1933 |
| XP_009243797.2[P.abelii]        | YSRADAARLLLDAGA-----D--ANAQDNMGRCPHAAVAADAQGVFQILLRNR-       |                                                      | 1933 |
|                                 |                                                              |                                                      |      |
| XP_012554603.1[H.vulgaris]      | -----                                                        | ECRCKDKVLSFDPKKRCINQCSLHYCKNGGSCQLKETGPVCRCSKNYSGDQC | 3202 |
| XP_019853114.1[A.queenslandica] | SINLVSSAERGLNIGE-----CNMTSCSSFPFCFNGGTCTETGSSFCQCPAGYEGGLC   |                                                      | 2145 |
| XP_032230096.1[N.vectensis]     | ---TTDLAEMEDGT-----                                          | TPILAAARLLDLIDIV                                     | 1650 |
| NP_001245510.1[D.melanogaster]  | ---ATNLNARMHDGT-----                                         | TPILAAARLAIEGMVE                                     | 2035 |
| XP_019643529.1[B.belcheri]      | ---ATDLADARTNDGT-----                                        | TPILAAARLAVEGVVE                                     | 2007 |
| XP_032815028.1[P.marinus]       | ---ATDVDARMHDGT-----                                         | TPILAAARLAVEGMAE                                     | 2022 |
| XP_014025097.1[S.salar]         | ---ATELDARMNDGT-----                                         | TPILAAARLAVEGMVE                                     | 1977 |
| XP_018114267.1[X.laevis]        | ---VTDLARMNDGT-----                                          | TPILAAARLAVEGMVA                                     | 1963 |
| NP_001238962.2[G.gallus]        | ---VTDLARMNDGT-----                                          | TPILAAARLAVEGMVA                                     | 1937 |
| NP_035058.2[M.musculus]         | ---VTDLARMNDGT-----                                          | TPILAAARLAVEGMVA                                     | 1962 |
| Q04721.3[H.sapiens]             | ---VTDLARMNDGT-----                                          | TPILAAARLAVEGMVA                                     | 1961 |
| XP_009243797.2[P.abelii]        | ---VTDLARMNDGT-----                                          | TPILAAARLAVEGMVA                                     | 1961 |
|                                 |                                                              |                                                      |      |
| XP_012554603.1[H.vulgaris]      | QTLQTKSN--AL-----MIVLVSLSTVAVVLIVIVLKNRKKRIYN--ECRNDLM--     |                                                      | 3248 |
| XP_019853114.1[A.queenslandica] | GLQTFSCLSPPCGNGGTCIEGVAEGGYN---C---LCPLGFGGNNCNEMLQVSTPSPNRT |                                                      | 2199 |
| XP_032230096.1[N.vectensis]     | DLIKASCKVNVNDAQGKSALHWAAVNNEHEVT--SELCKNGAKKMDQDKGTPLFLGA    |                                                      | 1707 |
| NP_001245510.1[D.melanogaster]  | DLITADADINAADNSGTALHWAAVNNEATEV--NILLMHANRDAQDDKDETPFLFAA    |                                                      | 2092 |
| XP_019643529.1[B.belcheri]      | ELLNSHADANACDDNGKSALHWAATNNEEAV--ISLLSHGVNVDQDNKEETPLFLAA    |                                                      | 2064 |
| XP_032815028.1[P.marinus]       | ELINCHADVKNVDDHGKSALHWAAVNNEATEV--LVLLKNGANKDMQDNKEETPLFLAA  |                                                      | 2079 |
| XP_014025097.1[S.salar]         | ELVHCHADINAVDDHGKSALHWAAVNNEATEV--LVLLKNGANRDMQDNKEETPLFLAA  |                                                      | 2034 |
| XP_018114267.1[X.laevis]        | DLINCQADVNAVDDHGKSALHWAAVNNEATEV--MVLLKNGANRDMQDNKEETPLFLAA  |                                                      | 2020 |
| NP_001238962.2[G.gallus]        | ELINCQADVNAVDDHGKSALHWAAVNNEATEV--LVLLKNGANRDMQDNKEETPLFLAA  |                                                      | 1994 |
| NP_035058.2[M.musculus]         | ELINCQADVNAVDDHGKSALHWAAVNNEATEV--LLLLKNGANRDMQDNKEETPLFLAA  |                                                      | 2019 |
| Q04721.3[H.sapiens]             | ELINCQADVNAVDDHGKSALHWAAVNNEATEV--LLLLKNGANRDMQDNKEETPLFLAA  |                                                      | 2018 |
| XP_009243797.2[P.abelii]        | ELINCQADVNAVDDHGKSALHWAAVNNEATEV--LLLLKNGANRDMQDNKEETPLFLAA  |                                                      | 2018 |
|                                 |                                                              |                                                      |      |
| XP_012554603.1[H.vulgaris]      | -----                                                        | YDDEKSLELSVKNSNLDKKS-VTL                             | 3271 |
| XP_019853114.1[A.queenslandica] | SYQYSSPAPISLSTIISLSFHTSSNGLILYIGDVSTTRDFLSLSLVSGR-----IQ     |                                                      | 2252 |
| XP_032230096.1[N.vectensis]     | REGSLEAV-----RILLLSYAN-----RMIADNMDKTPPEVARQRAHNDIVELL       |                                                      | 1751 |
| NP_001245510.1[D.melanogaster]  | REGSYEAC-----KALLDNFAN-----REITDHMDRLPRDVASERLHHDIVRLL       |                                                      | 2136 |
| XP_019643529.1[B.belcheri]      | REGSFQAA-----KILLDHYAN-----RDITDHMDRLPRDIAQERMHSDIVKLL       |                                                      | 2108 |
| XP_032815028.1[P.marinus]       | REGSYETA-----KLLLDHFAS-----RDITDHMDRLPRDIAQERLHHDIVRLL       |                                                      | 2123 |
| XP_014025097.1[S.salar]         | REGSFEAA-----QVLLDHYSN-----RDITDHMDRLPRDIAQERMHHDIVRLL       |                                                      | 2078 |
| XP_018114267.1[X.laevis]        | REGSFEAA-----KMLLDYFAN-----REITDHMDRLPRDIAKDRMHHDIVRLL       |                                                      | 2064 |
| NP_001238962.2[G.gallus]        | REGSFEAA-----KILLDHAN-----RDITDHMDRLPRDVAQDRMHHDIVQLL        |                                                      | 2038 |
| NP_035058.2[M.musculus]         | REGSYEAA-----KILLDHAN-----RDITDHMDRLPRDVARDRMHHDIVRLL        |                                                      | 2063 |
| Q04721.3[H.sapiens]             | REGSYEAA-----KILLDHAN-----RDITDHMDRLPRDVARDRMHHDIVRLL        |                                                      | 2062 |
| XP_009243797.2[P.abelii]        | REGSYEAA-----KILLDHAN-----RDITDHMDRLPRDVARDRMHHDIVRLL        |                                                      | 2062 |
|                                 |                                                              |                                                      |      |
| XP_012554603.1[H.vulgaris]      | TRYDHLRSSEKLG-----                                           |                                                      | 3284 |
| XP_019853114.1[A.queenslandica] | LRDYLGSPPAITASPSVPLNQWTSVTNVNRVRKDGVLVVDVSSTNGSSPGFAGLLNPAGN |                                                      | 2312 |
| XP_032230096.1[N.vectensis]     | SDWSIGCNSPKAAPSPSPDQSRPL--NGTASPPSMDQIS--GN-----             |                                                      | 1792 |
| NP_001245510.1[D.melanogaster]  | DEHVP-RSPQMLSMTPQA--MIGSPP--PGQQPQLITQPTVISAGNG-----G        |                                                      | 2180 |
| XP_019643529.1[B.belcheri]      | DEYNLVRSPPSQA-----AANCQNSF-----G--G-----H                    |                                                      | 2131 |
| XP_032815028.1[P.marinus]       | DEYNVVRNPSGP-----NGLASFPQ-----ANG-----                       |                                                      | 2146 |
| XP_014025097.1[S.salar]         | DQYNLVHSPHNG-----PNHMGGGH-----SSLVCGGNG-----A                |                                                      | 2108 |
| XP_018114267.1[X.laevis]        | DEYNLVHSTQCG-----PGSMLSNS-----LSPAVCGSN-----R                |                                                      | 2094 |
| NP_001238962.2[G.gallus]        | NEYNVHSPSTGH-----PGAMLNSA-----LSPVICGPN-----R                |                                                      | 2068 |

|                                 |                                                                 |      |
|---------------------------------|-----------------------------------------------------------------|------|
| NF_035058.2[M.musculus]         | DEYNVTSP-----PGTVLTSA---LSPVLCGPN-----R                         | 2090 |
| Q04721.3[H.sapiens]             | DEYNVTSP-----PGTVLTSA---LSPVICGPN-----R                         | 2089 |
| XP_009243797.2[P.abelii]        | DEYNVTSP-----PGTVLTSA---LSPVICGPN-----R                         | 2089 |
| .                               |                                                                 |      |
| XP_012554603.1[H.vulgaris]      | -RINGGATFD-----DNSPAPLIRNS-----DQK--R----                       | 3308 |
| XP_019853114.1[A.queenslandica] | LYIGGGAGGV---GGYQVSPNAGSH--VGL-----TGCV-----DTATLR----          | 2347 |
| XP_032230096.1[N.vectensis]     | KVV---THFP---VSAGTTRPKTNSTSTRGARS-----KVQENNGAKRRKRRRK          | 1835 |
| NF_001245510.1[D.melanogaster]  | NNNGNGASGKQSNQTAQKQ-AAKKAKLIEGSPDNGLDATGSLRRKASSKKTSAASKKAAN    | 2239 |
| XP_019643529.1[B.belcheri]      | HFMNGPTTKQ---QRAKPKRPNGK--MQHHT-----IARADASKMRKKK               | 2171 |
| XP_032815028.1[P.marinus]       | AYA-HG-AKA---GKKGVRRPKNKSGVAHDAK-----CKKAQ-KKV                  | 2182 |
| XP_014025097.1[S.salar]         | GYMGMR-PGP---QKKSRRGGAKEVGVGG--A-----TAKELKDMKAKRRKKP           | 2151 |
| XP_018114267.1[X.laavis]        | SFLNLK-HAA---QAKKTRRPSAKNVGPRSLPN-----LAKEPKDTKNRRRKK           | 2139 |
| NF_001238962.2[G.gallus]        | SFLNLK-HAS---LSKKSRKPNAGKIMPTNLTK-----D-----AKRRRK-KS           | 2106 |
| NF_035058.2[M.musculus]         | SFLSLK-HTP---MGKKARRPNTKSTMTPSLNP-----LAKEAKDAKGSRR-KK          | 2134 |
| Q04721.3[H.sapiens]             | SFLSLK-HTP---MGKKSRRPSAKSTMTPSLNP-----LAKEAKDAKGSRR-KK          | 2133 |
| XP_009243797.2[P.abelii]        | SFLSLK-HTP---MGKKSRRPSAKSTMTPSLNP-----LAKEAKDAKGSRR-KK          | 2133 |
| :                               |                                                                 |      |
| XP_012554603.1[H.vulgaris]      | -----VNSFGLGAVISSRGVQCQVDPCHSHSPCQNG--GSCV                      | 3308 |
| XP_019853114.1[A.queenslandica] | DDDLPHGNRKAS-----QGG---ASSTY-----SPYGKE-LSPC--SSGANFS           | 2382 |
| XP_032230096.1[N.vectensis]     | LNGLN--PGQLTGGVSGVPGVPPNTNSAAQAAAAA-AAVAAMSHLEGSFVGVGMGGNLP     | 1872 |
| NF_001245510.1[D.melanogaster]  | LEGTGTMF-----RHMDSTAL-----SPDGLGGSFPHGNTG-TP                    | 2296 |
| XP_019643529.1[B.belcheri]      | NGGVASGGGGDG-----APLLGLDGSASL-----SPVNSE-SSQ---SDG-TS           | 2206 |
| XP_032815028.1[P.marinus]       | TGGEPAVGASGNGTKAAGLLESSVTM-----SPVDSL-ESPHLYIGDA-AG             | 2220 |
| XP_014025097.1[S.salar]         | -----DTDNKGQLESSESVTL-----SPVDSL-ESPHA-----TS                   | 2198 |
| XP_018114267.1[X.laavis]        | -----LSEKGVQLESSESVTL-----SPVDSL-ESPHAFASEP-TS                  | 2167 |
| NF_001238962.2[G.gallus]        | -----CLNEKVQLESSESVTL-----SPVDSL-ESPHYTVSDA-TS                  | 2139 |
| NF_035058.2[M.musculus]         | -----SLSEKVQLESSESVTL-----SPVDSL-ESPHYTVSDT-TS                  | 2167 |
| Q04721.3[H.sapiens]             | -----SLSEKVQLESSESVTL-----SPVDSL-ESPHYTVSDT-TS                  | 2166 |
| XP_009243797.2[P.abelii]        | -----SLSEKVQLESSESVTL-----SPVDSL-ESPHYTVSDT-TS                  | 2166 |
| :                               |                                                                 |      |
| XP_012554603.1[H.vulgaris]      | -----SSDLTYSVCVPLGYSGDQCCEISNATEGAAISQCPTSVA-----CNVNPCL        | 3308 |
| XP_019853114.1[A.queenslandica] | PPAFSVVNGL-----SPQSSATG-----ISPSNSTTLSPQQ                       | 2428 |
| XP_032230096.1[N.vectensis]     | SPYDT-----SSMYSNAMAAPLANGNPNTGAKQPPSYEDCIKNAQSMQSLQ             | 1904 |
| NF_001245510.1[D.melanogaster]  | PPNSMYGVGSQHLALS-----HPNLHGVDTVHTTSTPQIV-----NSFSFTNGQPMRRLS    | 2342 |
| XP_019643529.1[B.belcheri]      | PSLLT---SPHVAHS---LYASMEAVGC--GPPRVG-----HPMAFRN-----           | 2257 |
| XP_032815028.1[P.marinus]       | ASKTT---NSPL-----LGSP-----                                      | 2255 |
| XP_014025097.1[S.salar]         | SPTIT---SPGTLHT---SPGQMHAATSTLQPH-----TTM---SMTNLQSIG           | 2211 |
| XP_018114267.1[X.laavis]        | SPVMP---SPGVLSH---SPSLLTAP---SVQAA---HSMFSNLHEMQPLG             | 2206 |
| NF_001238962.2[G.gallus]        | SPMIT---SPGILQA---SPTPLAAAPAPVHTQ---HALSFSNLHDMQPLA             | 2180 |
| NF_035058.2[M.musculus]         | SPMIT---SPGILQA---SPNFMATAAPAPVHAQ---HALSFSNLHEMQPLA            | 2212 |
| Q04721.3[H.sapiens]             | SPMIT---SPGILQA---SPNFMATAAPAPVHAQ---HALSFSNLHEMQPLA            | 2211 |
| XP_009243797.2[P.abelii]        | SPMIT---SPGILQA---SPNFMATAAPAPVHAQ---HALSFSNLHEMQPLA            | 2211 |
| :                               |                                                                 |      |
| XP_012554603.1[H.vulgaris]      | -----NGGKCI AVL-----V-NGIIEERCQCSLPFA---AGAKCEQRVSFSSAFFA----   | 3308 |
| XP_019853114.1[A.queenslandica] | HSSLD-----GDGYLLFPA-----VNIPLSSITIHTIIRLSIIPNSGSL-----L         | 2470 |
| XP_032230096.1[N.vectensis]     | GNGLDMIKLDNYAYSMGSPFQQLLNG--QGLMGNGNGRNG---VGPGVLPGLGCMGG       | 1932 |
| NF_001245510.1[D.melanogaster]  | HH---T-----ADSN-S---HQ-DQSTLGRGETGLGLHLDPPVSPVSDWLASLDS         | 2398 |
| XP_019643529.1[B.belcheri]      | -----SQRTHQGHSLGLTSSHPQSNHR-----GAIVASGWINPMQN                  | 2299 |
| XP_032815028.1[P.marinus]       | -----SSRPL-----LPPV-SHMLGO-Q-----QSWVG---L                      | 2270 |
| XP_014025097.1[S.salar]         | CAANNM-----LPSV-QQLLSQ-AAQN-----NVLAGQRQLNLSDDLSRMR             | 2233 |
| XP_018114267.1[X.laavis]        | RGSSTV-----LPSV-SQLLSQ-HRTTPPSS---GLGRLRPANVSTWEMNRMEM          | 2247 |
| NF_001238962.2[G.gallus]        | PGASTV-----LPSV-SQLLSH-HHIAPPGSSSAGSLRLHPVPVPADWMNRVEM          | 2224 |
| NF_035058.2[M.musculus]         | HGASTV-----LPSV-SQLLSH-HHIVSPGSGSAGSLRLHPVPVPADWMNRMEV          | 2260 |
| Q04721.3[H.sapiens]             | HGASTV-----LPSV-SQLLSH-HHIVSPGSGSAGSLRLHPVPVPADWMNRMEV          | 2259 |
| XP_009243797.2[P.abelii]        | HGASTV-----LPSV-SQLLSH-HHIVSPGSGSAGSLRLHPVPVPADWMNRMEV          | 2259 |
| :                               |                                                                 |      |
| XP_012554603.1[H.vulgaris]      | -----EDLTDQDLHGDFASPCGLRGS-----TSDLHDSISMPLPETTIGVPQDSSVPTTSACM | 3308 |
| XP_019853114.1[A.queenslandica] | SGA-----GNGNSHEQGLSPPYSNQSPPHSVQSSSLALSPHAYLGSPSPAKSRP---SLP    | 2506 |
| XP_032230096.1[N.vectensis]     | RNH---HYTQFSFRMHMTA---GLNHMPQ-----SQSPP---SGL                   | 1986 |
| NF_001245510.1[D.melanogaster]  | VPL-----SQFTHQGHSLGLTSSHPQSNHR-----AM                           | 2449 |
| XP_019643529.1[B.belcheri]      | KH-----GYGGMFSLLPQOMSGHPSMSQH-----HGQG-----L                    | 2332 |
| XP_032815028.1[P.marinus]       | NN-----TQYNEMFGLVHHDNTN--HS-CIQ-----NGIMQ---ADI                 | 2297 |
| XP_014025097.1[S.salar]         | NE-----SQYNEMFGMVPVPMH-SHPVSQ-----SGLVQ-----                    | 2264 |
| XP_018114267.1[X.laavis]        | NE-----TQYSEMFGMVLAPAEGAHPGIA-----PQSRP-----                    | 2279 |
| NF_001238962.2[G.gallus]        | NE-----TQYNEMFGMVLAPAEGTHPGIA-----PQSRP-----                    | 2254 |
| NF_035058.2[M.musculus]         | NE-----TQYSEMFGMVLAPAEGTHPGIA-----PQSRP-----                    | 2290 |
| Q04721.3[H.sapiens]             | NE-----TQYSEMFGMVLAPAEGTHPGIA-----PQSRP-----                    | 2288 |
| XP_009243797.2[P.abelii]        | NE-----TQYSEMFGMVLAPAEGTHPGIA-----PQSRP-----                    | 2288 |
| :                               |                                                                 |      |
| XP_012554603.1[H.vulgaris]      | -----LYIGHAN-----PSTGNYLLVGMNE-----GVLEFRFQ                     | 3308 |
| XP_019853114.1[A.queenslandica] | YLPKHS-----VAPFGHT-----                                         | 2534 |
| XP_032230096.1[N.vectensis]     | TSPTHQAMRHATQKQFGGSNLNSLLGGANGGVVGGGGGGGGVGGQGPQNSPVSLGII       | 1999 |
| NF_001245510.1[D.melanogaster]  | LSPPHSH-----GSITGGSPAQMAAFQAL                                   | 2509 |
| XP_019643529.1[B.belcheri]      | MSPLHP-----AMINNHQHMLAFQQN                                      | 2356 |
| XP_032815028.1[P.marinus]       | LTPMNV-----TMSREQLPPIVTFQMM                                     | 2319 |
| XP_014025097.1[S.salar]         | KPTLHM-----GVARDALPPIVTFQLI                                     | 2286 |
| XP_018114267.1[X.laavis]        | ADTKHL-----GVSRSLPPIVTFQLI                                      | 2301 |
| NF_001238962.2[G.gallus]        | PEGKHM-----STQREPLPPIVTFQLI                                     | 2276 |
| NF_035058.2[M.musculus]         | PEGKHI-----TTPREPLPPIVTFQLI                                     | 2312 |
| Q04721.3[H.sapiens]             | PEGKHI-----TTPREPLPPIVTFQLI                                     | 2310 |
| XP_009243797.2[P.abelii]        | PEGKHI-----TTPREPLPPIVTFQLI                                     | 2310 |
| :                               |                                                                 |      |
| XP_012554603.1[H.vulgaris]      | -----LGSGV---GLVETSQ---PL-----AIGQQHNITLLRTDYRGRILMSQNTTVF      | 3308 |
| XP_019853114.1[A.queenslandica] | A-----PRLYSAH-----SSPN-----LCADNESRQLIVAHISINGY                 | 2577 |
| XP_032230096.1[N.vectensis]     | SPTGSDMGIMLAPPQ-----SSKNSAIMQTIISPQQQ---QQQQQQQQQQQQQQQQQQQ     | 2030 |
| NF_001245510.1[D.melanogaster]  | SSSNAKQ-----QLAHS---NHNHNRMY                                    | 2560 |
| XP_019643529.1[B.belcheri]      | LYSPRNKPLMEAPQHHPQARGGAFFQSKMPMIQPSN---LQAASQSQLLASVSQSNMF      | 2379 |
| XP_032815028.1[P.marinus]       |                                                                 | 2377 |

|                           |                                     |      |
|---------------------------|-------------------------------------|------|
| XP_014025097.1[S.salar]   | -----APGGGQA-----LLKQPQPGQVQSQGQNGQ | 2312 |
| XP_018114267.1[X.laervis] | -----PKSGMNQ-----QTLVQQT-----       | 2315 |
| NP_001238962.2[G.gallus]  | -----PKGGINQ-----QALPQQA-----       | 2290 |
| NP_035058.2[M.musculus]   | -----PKGSIAQ-----AAGAPQT-----       | 2326 |
| Q04721.3[H.sapiens]       | -----PKGSIAQ-----PAGAPQP-----       | 2324 |
| XP_009243797.2[P.abelii]  | -----PKGSIAQ-----PAGAPQP-----       | 2324 |

|                                 |                                                           |      |
|---------------------------------|-----------------------------------------------------------|------|
| XP_012554603.1[H.vulgaris]      | -----                                                     | 3308 |
| XP_019853114.1[A.queenslandica] | TDGMSQGSSRHLNLSFYDFV---LFLGG---APNVPLISQ---QVYQTGFSGL---  | 2622 |
| XP_032230096.1[N.vectensis]     | PSN--QSSIQAC--K-----LS--NRLEEHVMMET-----T                 | 2055 |
| NP_001245510.1[D.melanogaster]  | Q-Q--QQQQQL--GGLEFGSAGLDLNGFCGSPD--SFHSGQMNPSSIQS-----    | 2603 |
| XP_019643529.1[B.belcheri]      | H-D--QHGNAGH--GS-----PLGGG-----GRMHDPIPLNVI PPGE-----     | 2412 |
| XP_032815028.1[P.marinus]       | PSL--QQHQGI--AV-----FMQSFVGSFEGESFASNDYKFKNEKSHSQTSCVLTQT | 2425 |
| XP_014025097.1[S.salar]         | PQS--QQGPETHL--HC-----PQGMLYQMPNVSLQHSLSHSLP-HPHG-----L   | 2351 |
| XP_018114267.1[X.laervis]       | --S-H-----AQ-----NVAGMYQMPDRARITGSSVPIA-M-----            | 2342 |
| NP_001238962.2[G.gallus]        | --Q--SNCAQNM--AG-----PLSSMYQISDLAQLPSASFMA-A-----         | 2323 |
| NP_035058.2[M.musculus]         | --Q--SSCPCPAV--AG-----PLPSMYQIPEMPRLPSVAFPTA-M-----       | 2359 |
| Q04721.3[H.sapiens]             | --Q--STCCPAV--AG-----PLPTMYQIPEMARLPSVAFPTA-M-----        | 2357 |
| XP_009243797.2[P.abelii]        | --Q--STCCPAV--AG-----PLPTMYQIPEMARLPSVAFPTA-M-----        | 2357 |

|                                 |                                                                |      |
|---------------------------------|----------------------------------------------------------------|------|
| XP_012554603.1[H.vulgaris]      | -----                                                          | 3308 |
| XP_019853114.1[A.queenslandica] | -----VSVVQLGYSMNPEVPVFDTSVGENVTTC-S-----                       | 2652 |
| XP_032230096.1[N.vectensis]     | LH---HN---NQSMCV-PVESGMFKEKHHTPPSAHSYGTSSYDS-SPQ-----KLPI      | 2099 |
| NP_001245510.1[D.melanogaster]  | --SMSSGSSPSTNMLSPSSQHNAQAFYQYLTSPSSQHSQSGH-----TPQH-----LVQTLD | 2650 |
| XP_019643529.1[B.belcheri]      | LPPHSHQTVLPFGSCAQFSSNNPAEQLTPTPSQHSNGNPQSHECTPTHYLSHAETIVPE    | 2472 |
| XP_032815028.1[P.marinus]       | VPPPQEANPSVQSSQLAKREGAAPAEQFTPTPSQHSRGEQSPGH---APPP---GTPGEH   | 2479 |
| XP_014025097.1[S.salar]         | AHGMVQDGG--SRQQLPYQAMQSPVDKYPTPPSQHSYATAGSEGTTPGYPA---HPPSEH   | 2407 |
| XP_018114267.1[X.laervis]       | --MHQHDGQLSQTMLTSYHPLQNPMGKYPTPPSQHSYAS---TDKTPNHNG---HLPGEH   | 2394 |
| NP_001238962.2[G.gallus]        | --IPQDGGQVPQTILPAYHQFQSSMGKYPTPPSQHSYAS-SATERTPSHNR---HLQGEH   | 2377 |
| NP_035058.2[M.musculus]         | --MPQDGGQVAQTIIVPTYHFFPASVGKYPTPPSQHSYASSNAERTPSHGG---HLQGEH   | 2414 |
| Q04721.3[H.sapiens]             | --MPQDGGQVAQTIILPAYHFFPASVGKYPTPPSQHSYASSNAERTPSHSG---HLQGEH   | 2412 |
| XP_009243797.2[P.abelii]        | --MPQDGGQVAQTIILPAYHFFPASMGKYPTPPSQHSYASSNAERTPSHSG---HLQGEH   | 2412 |

|                                 |                                                                |      |
|---------------------------------|----------------------------------------------------------------|------|
| XP_012554603.1[H.vulgaris]      | -----                                                          | 3308 |
| XP_019853114.1[A.queenslandica] | -----                                                          | 2652 |
| XP_032230096.1[N.vectensis]     | SYLTSPSPESPKDWSSS-PSS-HSDWSNC-----                             | 2125 |
| NP_001245510.1[D.melanogaster]  | SYPTSPSPESPGHWSSSSPRS-NSDWSEGVQSPAANNLYIS-----GGHQ-----        | 2693 |
| XP_019643529.1[B.belcheri]      | NYLTSPSPSPDQWSSSSPHSATSDWSGDISPPAAQSQRQPYI-PETHN-----          | 2520 |
| XP_032815028.1[P.marinus]       | PYLTSPSPETPERWSTCSPRSGASDWSGVSPPGLAARARRPA-----                | 2523 |
| XP_014025097.1[S.salar]         | PYLTSPSPSPDPWSSSSSPHS-NSDWSDVTTSTPTPLGNPHALPPLHHTHIPEQLQPQSQQT | 2466 |
| XP_018114267.1[X.laervis]       | PYLTSPSPSPDQWSSSSSPNS-ASDWSDVTTSTPTPNGS---QRM-PATHMPE-----     | 2440 |
| NP_001238962.2[G.gallus]        | PYLTSPSPSPDQWSSSSSPHS-ASDWSDVATSPGNN-----QRGPAAAHVPE-----      | 2422 |
| NP_035058.2[M.musculus]         | PYLTSPSPSPDQWSSSSSPHS-ASDWSDVTTSTPTGGGGGQGRGP-GTHMSE-----      | 2463 |
| Q04721.3[H.sapiens]             | PYLTSPSPSPDQWSSSSSPHS-ASDWSDVTTSTPTGGAGGGQGRGP-GTHMSE-----     | 2461 |
| XP_009243797.2[P.abelii]        | PYLTSPSPSPDQWSSSSSPHS-ASDWSDVTTSTPTGGAGGGQGRGP-GTHMSE-----     | 2461 |

|                                 |                  |      |
|---------------------------------|------------------|------|
| XP_012554603.1[H.vulgaris]      | -----            | 3308 |
| XP_019853114.1[A.queenslandica] | -----            | 2652 |
| XP_032230096.1[N.vectensis]     | -----            | 2125 |
| NP_001245510.1[D.melanogaster]  | -----ANKGSEAIYI  | 2703 |
| XP_019643529.1[B.belcheri]      | ---TRQGGHSALPVFI | 2533 |
| XP_032815028.1[P.marinus]       | --DPQQQ-LHNLQALM | 2536 |
| XP_014025097.1[S.salar]         | QQNPQQPQRGNMQVFA | 2482 |
| XP_018114267.1[X.laervis]       | -----QSHNGMQVYA  | 2450 |
| NP_001238962.2[G.gallus]        | -----QQRNNMQVYA  | 2432 |
| NP_035058.2[M.musculus]         | -----PPHSNMQVYA  | 2473 |
| Q04721.3[H.sapiens]             | -----PPHNNMQVYA  | 2471 |
| XP_009243797.2[P.abelii]        | -----PPHNNMQVYA  | 2471 |
